# Supplementary material for: Synaptic connectivity to L2/3 of primary visual cortex measured by two-photon optogenetic stimulation
Source: eLife. 2022 Jan 21;11:e71103. doi: 10.7554/eLife.71103 (PMC8824465; doi:10.7554/eLife.71103)
Supplement: Figure 1—figure supplement 1—source data 1. [file elife-71103-fig1-figsupp1-data1.xlsx]

## Sheet: Penk_eyfp_jitter
X2019_04_02_exp1_TH_power(mW)	33.5	98.3
X2019_04_02_exp1_TH_jitter(ms)	0.338611	0.676019
X2019_04_02_exp2_TH_power(mW)	8.2	15.2	33.5	98.3
X2019_04_02_exp2_TH_jitter(ms)	0.493334	0.127923	0.195541	0.187533
X2019_04_02_exp3_TH_power(mW)	44.1
X2019_04_02_exp3_TH_jitter(ms)	0.842962
X2019_04_02_exp4_TH_power(mW)	33.5	98.3
X2019_04_02_exp4_TH_jitter(ms)	0.0824531	0.352981
X2019_04_02_exp5_TH_power(mW)	8.2	15.2	33.5	98.3
X2019_04_02_exp5_TH_jitter(ms)	0.958445	0.178087	0.286251	1.29476
X2019_04_02_exp6_TH_power(mW)	23.4	33.5	98.3
X2019_04_02_exp6_TH_jitter(ms)	0.139223	0.113591	0.546477
X2020_08_21_exp4_TH_power(mW)	36.6	46.3	56	65.8	81.4
X2020_08_21_exp4_TH_jitter(ms)	0.588972	0.205664	0.209723	0.234749	0.280973
X2020_08_21_exp5_TH_power(mW)	36.6	56	81.4
X2020_08_21_exp5_TH_jitter(ms)	1.27095	0.401496	0.223267
binned_power(mW)	11.7	33.0125	50.6	65.8	93.23
binned_jitter(ms)	0.439447	0.37695	0.414961	0.234749	0.562652
binned_jitter_sd(ms)	0.381933	0.396305	0.299608	nan	0.492909

## Sheet: Rorb_eyfp_jitter
X2019_01_04_exp1_TH_power(mW)	33.5	98.3
X2019_01_04_exp1_TH_jitter(ms)	0.59898	0.654252
X2019_01_04_exp2_TH_power(mW)	15.2	33.5	98.3
X2019_01_04_exp2_TH_jitter(ms)	1.41447	0.370275	0.711643
X2019_01_04_exp3_TH_power(mW)	8.2	15.2	33.5
X2019_01_04_exp3_TH_jitter(ms)	0.84121	0.591714	0.257208
X2019_01_04_exp4_TH_power(mW)	15.2	33.5
X2019_01_04_exp4_TH_jitter(ms)	0.570677	0.353928
X2019_01_04_exp5_TH_power(mW)	44.1	98.3
X2019_01_04_exp5_TH_jitter(ms)	0.321297	0.538888
X2019_01_04_exp6_TH_power(mW)	8.2	15.2	33.5	98.3
X2019_01_04_exp6_TH_jitter(ms)	0.949698	0.227675	0.168715	0.298404
X2019_03_18_exp1_TH_power(mW)	23.4	33.5	55.6	98.3
X2019_03_18_exp1_TH_jitter(ms)	0.448591	0.228381	0.584531	0.268302
X2019_03_18_exp2_TH_power(mW)	23.4	33.5	44.1	98.3
X2019_03_18_exp2_TH_jitter(ms)	0.643017	0.707692	0.772059	0.993219
X2019_03_18_exp3_TH_power(mW)	55.6	67	98.3
X2019_03_18_exp3_TH_jitter(ms)	0.33223	1.08858	0.593561
X2019_03_18_exp4_TH_power(mW)	33.5	67	98.3
X2019_03_18_exp4_TH_jitter(ms)	0.251981	0.451772	0.388522
binned_power(mW)	12.8667	31.8167	49.85	67	98.3
binned_jitter(ms)	0.765908	0.416502	0.502529	0.706495	0.56623
binned_jitter_sd(ms)	0.404534	0.187245	0.216962	0.63265	0.296364

## Sheet: Tlx3_eyfp_jitter
X2019_02_14_exp1_TH_power(mW)	23.4	33.5	98.3
X2019_02_14_exp1_TH_jitter(ms)	1.15228	0.302275	0.315537
X2019_02_14_exp2_TH_power(mW)	33.5	55.6	98.3
X2019_02_14_exp2_TH_jitter(ms)	0.275857	0.167419	0.128406
X2019_02_14_exp3_TH_power(mW)	55.6	98.3
X2019_02_14_exp3_TH_jitter(ms)	0.80534	0.282959
X2019_02_14_exp4_TH_power(mW)	8.2	15.2	33.5	98.3
X2019_02_14_exp4_TH_jitter(ms)	1.52918	0.901166	0.429507	0.301099
X2019_02_14_exp5_TH_power(mW)	8.2	15.2	33.5	55.6
X2019_02_14_exp5_TH_jitter(ms)	3.40264	0.880988	0.473962	0.513232
X2019_02_14_exp6_TH_power(mW)	23.4	33.5	55.6	98.3
X2019_02_14_exp6_TH_jitter(ms)	0.660844	0.239955	0.286138	0.325588
X2019_02_14_exp8_TH_power(mW)	8.2	15.2	33.5
X2019_02_14_exp8_TH_jitter(ms)	2.79182	0.125362	0.161911
X2019_02_14_exp9_TH_power(mW)	98.3
X2019_02_14_exp9_TH_jitter(ms)	1.50957
X2019_02_18_exp3_TH_power(mW)	23.4	33.5	55.6	98.3
X2019_02_18_exp3_TH_jitter(ms)	0.715132	0.119479	0.28998	0.403567
X2019_02_18_exp4_TH_power(mW)	23.4	33.5	55.6	98.3
X2019_02_18_exp4_TH_jitter(ms)	0.410745	0.245495	0.251379	0.257423
X2020_05_29_exp3_TH_power(mW)	27.9	56	81.4
X2020_05_29_exp3_TH_jitter(ms)	0.729143	0.580096	0.192108
X2020_07_09_exp4_TH_power(mW)	56	81.4
X2020_07_09_exp4_TH_jitter(ms)	5.80106	1.10329
binned_power(mW)	11.7	29.9615	55.6889	94.6786
binned_jitter(ms)	1.60519	0.455122	0.994003	0.506728
binned_jitter_sd(ms)	1.25337	0.291318	1.81414	0.485393

## Sheet: Pvalb_eyfp_jitter
X2018_12_17_exp1_TH_power(mW)	8.2	33.5
X2018_12_17_exp1_TH_jitter(ms)	0.632734	0.498847
X2018_12_17_exp4_TH_power(mW)	15.2	33.5
X2018_12_17_exp4_TH_jitter(ms)	0.321637	0.286127
X2018_12_17_exp5_TH_power(mW)	23.4	33.5
X2018_12_17_exp5_TH_jitter(ms)	0.186002	0.133543
X2020_03_18_exp1_TH_power(mW)	6.6	12.8	27.9
X2020_03_18_exp1_TH_jitter(ms)	1.3005	0.718561	0.423651
X2020_03_18_exp2_TH_power(mW)	0.5	2.8	6.6	12.8	27.9
X2020_03_18_exp2_TH_jitter(ms)	1.27843	0.589675	0.299719	0.197614	0.183363
X2020_03_18_exp3_TH_power(mW)	2.8	6.6	12.8	27.9
X2020_03_18_exp3_TH_jitter(ms)	1.2466	0.36484	0.21969	0.114913
X2020_03_18_exp4_TH_power(mW)	2.8	6.6	12.8	27.9
X2020_03_18_exp4_TH_jitter(ms)	2.06788	0.944925	0.376516	0.156996
X2020_03_18_exp5_TH_power(mW)	6.6	12.8	27.9
X2020_03_18_exp5_TH_jitter(ms)	0.482875	0.280657	0.147899
X2020_03_18_exp6_TH_power(mW)	2.8	6.6	12.8	27.9
X2020_03_18_exp6_TH_jitter(ms)	1.05757	0.471117	0.406628	0.168154
binned_power(mW)	7.985	29.2824	nan	nan
binned_jitter(ms)	0.694545	0.223484	nan	nan
binned_jitter_sd(ms)	0.490958	0.154837	nan	nan

## Sheet: Sst_eyfp_jitter
X2018_12_06_exp1_TH_power(mW)	8.2	15.2	33.5	55.6
X2018_12_06_exp1_TH_jitter(ms)	0.259241	0.231079	0.183788	0.582932
X2018_12_06_exp2_TH_power(mW)	8.2	15.2	33.5	55.6
X2018_12_06_exp2_TH_jitter(ms)	0.859599	0.51302	0.365467	0.260053
X2018_12_06_exp3_TH_power(mW)	8.2	15.2	33.5
X2018_12_06_exp3_TH_jitter(ms)	0.745237	0.257734	0.140956
X2018_12_06_exp4_TH_power(mW)	8.2	15.2	33.5
X2018_12_06_exp4_TH_jitter(ms)	1.73393	0.281599	0.181224
X2018_12_06_exp5_TH_power(mW)	23.4	33.5
X2018_12_06_exp5_TH_jitter(ms)	0.346549	0.341713
X2018_12_06_exp6_TH_power(mW)	8.2	15.2	33.5
X2018_12_06_exp6_TH_jitter(ms)	2.06024	1.04103	0.801043
X2018_12_06_exp7_TH_power(mW)	23.4	33.5
X2018_12_06_exp7_TH_jitter(ms)	0.684156	0.987303
X2019_03_06_exp4_TH_power(mW)	15.2	33.5
X2019_03_06_exp4_TH_jitter(ms)	0.0863534	0.204166
X2019_03_06_exp5_TH_power(mW)	8.2	15.2	33.5
X2019_03_06_exp5_TH_jitter(ms)	1.13012	0.284893	0.632917
X2019_03_11_exp2_TH_power(mW)	8.2	15.2	33.5
X2019_03_11_exp2_TH_jitter(ms)	0.216957	0.142354	0.130331
X2019_03_11_exp3_TH_power(mW)	15.2	33.5
X2019_03_11_exp3_TH_jitter(ms)	0.173835	0.125667
X2019_03_11_exp4_TH_power(mW)	15.2	33.5
X2019_03_11_exp4_TH_jitter(ms)	0.291179	0.422507
X2019_08_02_exp2_TH_power(mW)	15.2	33.5
X2019_08_02_exp2_TH_jitter(ms)	0.174878	0.162111
X2019_08_02_exp3_TH_power(mW)	8.2	15.2	33.5
X2019_08_02_exp3_TH_jitter(ms)	1.03575	1.1562	0.326696
X2020_08_20_exp2_TH_power(mW)	9.7	12.8	19.8	36.6
X2020_08_20_exp2_TH_jitter(ms)	3.41356	0.643407	1.8684	0.301439
binned_power(mW)	12.6217	32.8893	55.6	nan
binned_jitter(ms)	0.808721	0.37251	0.421492	nan
binned_jitter_sd(ms)	0.816354	0.298873	0.22831	nan

## Sheet: Rorb_Ai_jitter
X2018_04_04_exp1_AB_power(mW)	16.7	23.3	53.2	87
X2018_04_04_exp1_AB_jitter(ms)	0.908602	0.0954318	0.218	0.314949
X2018_04_04_exp2_AB_power(mW)	87
X2018_04_04_exp2_AB_jitter(ms)	0.293131
X2018_04_04_exp2_TH_power(mW)	18	40	66.3
X2018_04_04_exp2_TH_jitter(ms)	0.177327	0.230153	0.113435
X2018_04_04_exp3_AB_power(mW)	37.7	67.3	87
X2018_04_04_exp3_AB_jitter(ms)	0.31035	0.272167	0.186342
X2018_04_04_exp3_TH_power(mW)	9.8
X2018_04_04_exp3_TH_jitter(ms)	0.329048
X2018_04_04_exp4_AB_power(mW)	16.7	23.3	37.7	87
X2018_04_04_exp4_AB_jitter(ms)	0.277982	0.163465	0.302529	0.555264
X2018_04_04_exp5_AB_power(mW)	11.3	23.3	45.2
X2018_04_04_exp5_AB_jitter(ms)	0.660061	0.139702	0.392544
X2018_04_04_exp5_TH_power(mW)	18
X2018_04_04_exp5_TH_jitter(ms)	0.212953
X2018_04_04_exp6_TH_power(mW)	19.6	27.8	52.3
X2018_04_04_exp6_TH_jitter(ms)	0.373777	0.29576	0.228593
X2019_06_07_exp10_TH_power(mW)	33.5	55.6	67	98.3
X2019_06_07_exp10_TH_jitter(ms)	0.410536	0.201976	0.173615	0.364131
X2019_06_07_exp11_TH_power(mW)	33.5	55.6	98.3
X2019_06_07_exp11_TH_jitter(ms)	0.404074	0.3166	0.665642
X2019_06_07_exp1_TH_power(mW)	15.2	33.5	55.6	78.3	98.3
X2019_06_07_exp1_TH_jitter(ms)	1.15515	0.464345	0.202846	0.252893	0.294919
X2019_06_07_exp2_TH_power(mW)	15.2	55.6	98.3
X2019_06_07_exp2_TH_jitter(ms)	0.227231	0.0910855	0.229161
X2019_06_07_exp4_TH_power(mW)	15.2	55.6	98.3
X2019_06_07_exp4_TH_jitter(ms)	0.13825	0.0647523	0.0893902
X2019_06_07_exp5_TH_power(mW)	15.2	55.6	98.3
X2019_06_07_exp5_TH_jitter(ms)	0.547471	0.236774	0.206956
X2019_06_07_exp6_TH_power(mW)	67	98.3
X2019_06_07_exp6_TH_jitter(ms)	0.215316	0.209612
X2019_06_07_exp7_TH_power(mW)	33.5	55.6	98.3
X2019_06_07_exp7_TH_jitter(ms)	0.230604	0.209254	0.370373
X2019_06_07_exp9_TH_power(mW)	15.2	55.6	98.3
X2019_06_07_exp9_TH_jitter(ms)	0.586739	0.571274	0.381308
binned_power(mW)	15.5083	31.5545	58.6471	96.2455
binned_jitter(ms)	0.466216	0.276995	0.226601	0.31694
binned_jitter_sd(ms)	0.316818	0.118427	0.122183	0.186539

## Sheet: Scnn1a_Ai_jitter
X2018_04_02_exp1_AB_power(mW)	37.7	53.2	67.3	79.3	87
X2018_04_02_exp1_AB_jitter(ms)	0.126357	0.202785	0.177516	0.22557	0.175269
X2018_04_02_exp1_TH_power(mW)	18	40	79.6
X2018_04_02_exp1_TH_jitter(ms)	2.14087	2.37044	1.70391
X2018_04_02_exp2_AB_power(mW)	3.4	6.7	87
X2018_04_02_exp2_AB_jitter(ms)	7.12259	0.419801	0.634362
X2018_04_02_exp2_TH_power(mW)	12.7	19.3
X2018_04_02_exp2_TH_jitter(ms)	0.433633	0.281468
X2018_04_02_exp3_TH_power(mW)	27.8	40
X2018_04_02_exp3_TH_jitter(ms)	1.50589	0.757977
X2018_04_02_exp4_AB_power(mW)	37.7	67.3	87
X2018_04_02_exp4_AB_jitter(ms)	0.878184	0.145321	0.323233
X2018_04_02_exp4_TH_power(mW)	81.4	87
X2018_04_02_exp4_TH_jitter(ms)	1.17081	0.610796
X2018_04_02_exp5_AB_power(mW)	6.7	87
X2018_04_02_exp5_AB_jitter(ms)	0.391918	3.55318
X2018_04_02_exp5_TH_power(mW)	4.2
X2018_04_02_exp5_TH_jitter(ms)	0.870957
X2018_04_02_exp6_AB_power(mW)	23.3	37.7	87
X2018_04_02_exp6_AB_jitter(ms)	0.11099	0.245598	0.228051
X2018_04_02_exp6_TH_power(mW)	79.6	93.6
X2018_04_02_exp6_TH_jitter(ms)	0.891694	0.39315
X2018_04_02_exp7_AB_power(mW)	6.7	11.3	23.3	37.7	87
X2018_04_02_exp7_AB_jitter(ms)	3.53711	0.893285	0.781496	0.270704	0.271881
X2018_04_02_exp7_TH_power(mW)	18	27.8
X2018_04_02_exp7_TH_jitter(ms)	0.422713	0.411774
X2018_04_02_exp8_AB_power(mW)	11.3	37.7	87
X2018_04_02_exp8_AB_jitter(ms)	1.03162	0.320006	0.153387
X2018_04_02_exp8_TH_power(mW)	18
X2018_04_02_exp8_TH_jitter(ms)	0.533869
binned_power(mW)	11.3583	33.7	71.05	87.0909
binned_jitter(ms)	1.50665	0.70722	0.557799	0.738629
binned_jitter_sd(ms)	2.00607	0.691032	0.628684	0.981592

## Sheet: Ntsr1_Ai_jitter
X2018_04_24_exp1_TH_power(mW)	15.2	33.5	55.6	88.8
X2018_04_24_exp1_TH_jitter(ms)	0.214305	0.163647	0.147892	0.108268
X2018_04_24_exp2_AB_power(mW)	13.7	28.9	92.6
X2018_04_24_exp2_AB_jitter(ms)	0.0994353	0.0521829	0.0525193
X2018_04_24_exp2_TH_power(mW)	15.2	33.5	88.8
X2018_04_24_exp2_TH_jitter(ms)	0.170793	0.0704689	0.114235
X2018_04_24_exp3_AB_power(mW)	7.9	13.7	92.6
X2018_04_24_exp3_AB_jitter(ms)	0.538876	0.103542	0.245934
X2018_04_24_exp3_TH_power(mW)	15.2	23.4	88.8
X2018_04_24_exp3_TH_jitter(ms)	0.122146	0.164792	0.0875096
X2018_04_24_exp4_AB_power(mW)	13.7	20.6	66.7	92.6
X2018_04_24_exp4_AB_jitter(ms)	0.18975	0.394345	0.0912612	0.0748072
X2018_04_24_exp4_TH_power(mW)	15.2	23.4	88.8
X2018_04_24_exp4_TH_jitter(ms)	0.517841	0.0602739	0.060951
X2020_02_10_exp2_TH_power(mW)	8.2	12.8	33.5	81.4
X2020_02_10_exp2_TH_jitter(ms)	0.26474	0.145025	0.261698	0.123768
X2020_02_10_exp3_TH_power(mW)	36.6	46.3	81.4
X2020_02_10_exp3_TH_jitter(ms)	1.074	1.10938	0.745572
X2020_02_10_exp4_TH_power(mW)	2.8	6.6	27.9	81.4
X2020_02_10_exp4_TH_jitter(ms)	0.5718	0.366525	0.109384	0.0720263
binned_power(mW)	11.6833	29.0333	56.2	88.5538
binned_jitter(ms)	0.275398	0.261199	0.449511	0.146528
binned_jitter_sd(ms)	0.177728	0.324166	0.572165	0.187488

## Sheet: Sst_Ai_jitter
X2018_03_01_exp4_TH_power(mW)	66.3	79.6
X2018_03_01_exp4_TH_jitter(ms)	0.425923	0.230561
X2018_03_01_exp5_TH_power(mW)	27.8	40	66.3
X2018_03_01_exp5_TH_jitter(ms)	0.883186	0.506563	0.251083
X2018_03_02_exp1_TH_power(mW)	66.3
X2018_03_02_exp1_TH_jitter(ms)	0.548897
X2018_03_02_exp2_TH_power(mW)	93.6
X2018_03_02_exp2_TH_jitter(ms)	0.282134
X2018_03_02_exp3_TH_power(mW)	79.6	93.6
X2018_03_02_exp3_TH_jitter(ms)	0.373686	0.182933
X2018_03_02_exp4_AB_power(mW)	87
X2018_03_02_exp4_AB_jitter(ms)	0.292381
X2018_03_02_exp5_TH_power(mW)	40	52.3	79.6
X2018_03_02_exp5_TH_jitter(ms)	2.07198	0.657129	0.275755
X2018_05_07_exp1_AB_power(mW)	8.2	23.4	44.1	88.8
X2018_05_07_exp1_AB_jitter(ms)	0.408544	0.222712	0.137239	0.184608
X2018_05_07_exp2_AB_power(mW)	23.4
X2018_05_07_exp2_AB_jitter(ms)	1.338
X2018_05_07_exp3_AB_power(mW)	78.3	88.8	98.3
X2018_05_07_exp3_AB_jitter(ms)	0.283366	0.356203	0.156464
X2018_11_09_exp1_TH_power(mW)	15.2	23.4	33.5	55.6	78.3	98.3
X2018_11_09_exp1_TH_jitter(ms)	4.0746	0.137986	0.251706	0.0849105	0.152553	0.438683
X2018_11_09_exp2_TH_power(mW)	33.5	55.6	98.3
X2018_11_09_exp2_TH_jitter(ms)	1.75541	1.05057	0.571676
X2018_11_09_exp3_TH_power(mW)	15.2	33.5	55.6	98.3
X2018_11_09_exp3_TH_jitter(ms)	1.01832	0.264136	0.276643	0.222575
X2018_11_09_exp4_TH_power(mW)	15.2	23.4	33.5	55.6	98.3
X2018_11_09_exp4_TH_jitter(ms)	4.50483	0.605226	0.514946	0.457632	0.267731
X2018_11_09_exp5_TH_power(mW)	15.2	33.5	55.6	98.3
X2018_11_09_exp5_TH_jitter(ms)	2.47368	0.392266	0.51571	0.790645
X2018_11_09_exp6_TH_power(mW)	23.4	33.5	55.6	78.3	98.3
X2018_11_09_exp6_TH_jitter(ms)	0.15866	0.173662	0.121928	0.134008	0.179537
X2018_11_09_exp7_TH_power(mW)	67	98.3
X2018_11_09_exp7_TH_jitter(ms)	1.25938	0.830909
binned_power(mW)	13.8	30.4143	64.9778	96.0944
binned_jitter(ms)	2.49599	0.662603	0.402054	0.355085
binned_jitter_sd(ms)	1.80754	0.626178	0.320003	0.223127

## Sheet: Rorb_eyfp_latency
X2019_01_04_exp1_TH_power(mW)	33.5	98.3
X2019_01_04_exp1_TH_latency(ms)	9.31641	5.46877
X2019_01_04_exp2_TH_power(mW)	15.2	33.5	98.3
X2019_01_04_exp2_TH_latency(ms)	9.24692	5.33426	5.23371
X2019_01_04_exp3_TH_power(mW)	8.2	15.2	33.5
X2019_01_04_exp3_TH_latency(ms)	7.6892	6.10685	4.67103
X2019_01_04_exp4_TH_power(mW)	15.2	33.5
X2019_01_04_exp4_TH_latency(ms)	8.06688	6.26836
X2019_01_04_exp5_TH_power(mW)	44.1	98.3
X2019_01_04_exp5_TH_latency(ms)	10.2411	7.22759
X2019_01_04_exp6_TH_power(mW)	8.2	15.2	33.5	98.3
X2019_01_04_exp6_TH_latency(ms)	12.6812	7.76288	5.3286	3.5217
X2019_03_18_exp1_TH_power(mW)	23.4	33.5	55.6	98.3
X2019_03_18_exp1_TH_latency(ms)	6.4759	5.94857	4.90155	4.15431
X2019_03_18_exp2_TH_power(mW)	23.4	33.5	44.1	98.3
X2019_03_18_exp2_TH_latency(ms)	14.1037	14.5144	11.401	11.3292
X2019_03_18_exp3_TH_power(mW)	55.6	67	98.3
X2019_03_18_exp3_TH_latency(ms)	11.9367	11.3048	7.33397
X2019_03_18_exp4_TH_power(mW)	33.5	67	98.3
X2019_03_18_exp4_TH_latency(ms)	9.02871	8.61861	5.70432
binned_power(mW)	12.8667	31.8167	49.85	67	98.3
binned_latency(ms)	8.59232	7.97005	9.6201	9.69309	6.30542
binned_latency_sd(ms)	2.24073	3.45959	3.22432	2.98131	2.19448

[truncated: 43 more sheets: Tlx3_eyfp_latency, Pvalb_eyfp_latency, Sst_eyfp_latency, Rorb_Ai_latency, Scnn1a_Ai_latency, Sst_Ai_latency, Ntsr1_Ai_latency, Penk_eyfp_numAPs, Rorb_eyfp_numAPs, Tlx3_eyfp_numAPs, Pvalb_eyfp_numAPs, Sst_eyfp_numAPs, Rorb_Ai_numAPs, Scnn1a_Ai_numAPs, Ntsr1_Ai_numAPs, Sst_Ai_numAPs, Pvalb_lat_lateral_res_heat, Sst_EYFP_lat_lateral_res_heat, SstAi_lat_lateral_res_heat, Ntsr1_lat_lateral_res_heat …]
