# Supplementary material for: Synaptic connectivity to L2/3 of primary visual cortex measured by two-photon optogenetic stimulation
Source: eLife. 2022 Jan 21;11:e71103. doi: 10.7554/eLife.71103 (PMC8824465; doi:10.7554/eLife.71103)
Supplement: Figure 1—source data 1. [file elife-71103-fig1-data1.xlsx]

## Sheet: Figure 1B
Sst:Ai167_power(mW)	8.2	15.2	15.2	15.2	15.2	23.4	23.4	27.8	33.5	40	66.3	66.3	67	78.3	79.6	85	93.6	128.3	147.8
Sst:Ai167_fraction	0.0526316	0.105263	0.157895	0.210526	0.263158	0.315789	0.368421	0.421053	0.473684	0.526316	0.578947	0.631579	0.684211	0.736842	0.789474	0.842105	0.894737	0.947368	1
Rorb:Ai167_power(mW)	9.8	11.3	15.2	15.2	15.2	15.2	15.2	16.7	16.7	18	18	19.6	33.5	33.5	33.5	37.7	67	87	nan
Rorb:Ai167_fraction	0.0526316	0.105263	0.157895	0.210526	0.263158	0.315789	0.368421	0.421053	0.473684	0.526316	0.578947	0.631579	0.684211	0.736842	0.789474	0.842105	0.894737	0.947368	1
Scnn1a:Ai167_power(mW)	3.4	4.2	6.7	6.7	11.3	12.7	18	18	18	27.8	37.7	37.7	79.6	87	136.6
Scnn1a:Ai167_fraction	0.0666667	0.133333	0.2	0.266667	0.333333	0.4	0.466667	0.533333	0.6	0.666667	0.733333	0.8	0.866667	0.933333	1
Ntsr1:Ai167_power(mW)	2.8	7.9	8.2	13.7	13.7	15.2	15.2	15.2	15.2	36.6
Ntsr1:Ai167_fraction	0.1	0.2	0.3	0.4	0.5	0.6	0.7	0.8	0.9	1
Sst:AAV_power(mW)	8.2	8.2	8.2	8.2	8.2	8.2	8.2	8.2	9.7	15.2	15.2	15.2	15.2	23.4	23.4	107.1
Sst:AAV_fraction	0.0625	0.125	0.1875	0.25	0.3125	0.375	0.4375	0.5	0.5625	0.625	0.6875	0.75	0.8125	0.875	0.9375	1
Rorb:AAV_power(mW)	8.2	8.2	15.2	15.2	23.4	23.4	33.5	33.5	44.1	55.6
Rorb:AAV_fraction	0.1	0.2	0.3	0.4	0.5	0.6	0.7	0.8	0.9	1
Tlx3:AAV_powe(mW)	8.2	8.2	8.2	23.4	23.4	23.4	23.4	27.9	33.5	55.6	56	98.3
Tlx3:AAV_fraction	0.0833333	0.166667	0.25	0.333333	0.416667	0.5	0.583333	0.666667	0.75	0.833333	0.916667	1
Penk:AAV_power(mW)	8.2	8.2	23.4	33.5	33.5	36.6	36.6	44.1
Penk:AAV_fraction	0.125	0.25	0.375	0.5	0.625	0.75	0.875	1
Pvalb:AAV_power(mW)	0.5	2.8	2.8	2.8	2.8	2.8	6.6	8.2	12.8	15.2	16.8	23.4	44.1	nan
Pvalb:AAV_fraction	0.0714286	0.142857	0.214286	0.285714	0.357143	0.428571	0.5	0.571429	0.642857	0.714286	0.785714	0.857143	0.928571	1

## Sheet: Figure 1C
Cre:effector	spike_count	spike_count_sd	latency(ms)	latency_sd(ms)	jitter(ms)	jitter_sd(ms)	lateral_FWHM(um)	lateral_res_FWHM(um)	axial_FWHM(um)	axial_FWHM_sd(um)
Rorb:Ai167	1.43636	0.672271	4.62002	1.97777	0.31694	0.186539	13.2	8.77	62.39	26.74
Scnn1a:Ai167	1.46364	0.774949	6.92647	2.79255	0.738629	0.981592	23.32	5.01	49.49	8.9
Ntsr1:Ai167	1.88462	0.810191	2.41995	1.53861	0.146528	0.187488	15.6607	6.781	68.16	26.08
Sst:Ai167	1.87222	0.811539	6.25994	3.06567	0.355085	0.223127	15.05	4.96	63.5	14.9
Penk:AAV	2.79	0.8144	5.756	1.8697	0.5328	0.47795	12.48	3.47	52.9	11.66
Rorb:AAV	1.62857	0.456456	6.30542	2.19448	0.56623	0.296364	19.39	2.07	75.29	28.19
Tlx3:AAV	2.2143	1.2402	7.333	3.077	0.4942	0.47088	13.65	4.92	37.97	10.67
Pvalb:AAV	3.359	1.659	3.436	2.552	0.2235	0.1548	18.82	10.39	52.53	18.97
Sst:AAV	3.029	1.646	5.4115	2.9357	0.3725	0.29887	15.38	9.13	47.26	26.25
