# Supplementary material for: Synaptic connectivity to L2/3 of primary visual cortex measured by two-photon optogenetic stimulation
Source: eLife. 2022 Jan 21;11:e71103. doi: 10.7554/eLife.71103 (PMC8824465; doi:10.7554/eLife.71103)
Supplement: Figure 2—source data 1. [file elife-71103-fig2-data1.xlsx]

## Sheet: Fig2B
Penk:AAV density (cells/mm^3)	4838.43	6206.1	6841.11	8425.15	8544.86	8563.65	8835.41	8922.51	9988.25	9995.04	10099	10113.8	10261.3	10760.2	10844	11756.5	12351.5
Rorb:AAV density (cells/mm^3)	10250.9	10286	14721	15378.1	16678.4	17394.2	17809.1	18755.1	19268.2	19870.1	20051.2	20284.4	22149.9	22285	22476	22505.8	23633.7	28127.3	34525.4
Tlx3:AAV density (cells/mm^3)	11304.7	14562.1	16123.5	20109.1	21573.9	22270.3	23834.6	24202.6	24662.7	25155.7	25430.7	26514.5	27988.1	28894.5
Sst:AAV density (cells/mm^3)	1140.28	1378.32	1433	1859.59	2027.2	2076.94	2083.36	2247.31	2406.52	2415.64	2468	2692.32	3120.81	3323.14	3450.25	3591.42	3698.23	3711.83	3836.09	4065.56	4098.39	4115.19	4186.65	4225.68	4288.26	4344.01	4473.31	4481.97	4573.08	4686.06	4763.86	4779.18	4794.73	5168.34	5187.24	5239.1	5281.4	5338.45	5373.22	5435.28	5481.3	5517	5612.64	5690.73	5726.38	6469.44	6785.83	7448.42
Pvalb:AAV density (cells/mm^3)	896.14	1091.72	1401.13	1459.56	1548.57	1577.94	2046.75	2251.15	2400.24	2567.96	2576.93	2941.55	3005.67	3060.88	3110.3	3220.47	3311.31	4166.49	4224.11	4489.01	4510.08	4516.42	5931.48	6043.97	7038.53	7690.14
Cre:AAV	Penk	Rorb	Tlx3	Sst	Pvalb
Cre_tdT_density	13859	18703.8	24947.5	4843.94	4594.79
AAV_tdT_density	9255.7	19813.1	22330.5	4095.65	3349.17

## Sheet: Fig2C
Rorb:Ai167 density (cells/mm^3)	828.225	2001.24	2211.68	2273.43	2355.87	2495.45	2566.75	2770.05	2868.64	2915.7	2944.68	2965.89	3440.11	3464.17	3521.74	3620.82	3789.29	3989.56	4088.89	4494.78	5190.25	5571.81	5598.48	5927.08	6045.77	6157.79	6236.02	7459.44	7851.91	8337.96	8618.85	8991.7
Scnn1a:Ai167 density (cells/mm^3)	570.729	668.156	676.884	752.437	779.812	864.788	997.726	1051.63	1398.51	1560.36	1683.19	1727.72	2469.95	3260.69	3833.2	5384.25
Ntsr1:Ai167 density (cells/mm^3)	4050.93	4204.37	4527.6	6452.11	7416.39	7906.45	8944.86	12496	14536.5	14668.8	15846.5	20077.5
Sst:Ai167 density (cells/mm^3)	280.043	292.724	495.128	510.776	642.598	723.56	731.245	805.46	888.894	1037.87	1130.06	1156.79	1185.94	1207.13	1236.49	1269.06	1275.1	1289.08	1528.1	1530.86	1607.7	1646.8	1652.63	1687.45	1816.76	1895.87	1926.73	2099.39	2100.29	2379.61	2551.42	2551.42	4054.92
Cre:Ai167	Rorb	Scnn1a	Ntsr1	Sst
Cre_tdT_density	18703.8	16299.5	28170.2	4843.94
Ai167_tdT_density	4424.81	1730	10094	1429.94

## Sheet: Fig2F_Tlx3neighbors
0.0147059	0.0257353	0.113971	0.0992647	0.176471	0.180147	0.253676	0.231618	0.231618	0.283088
0.00301205	0.0421687	0.0753012	0.123494	0.141566	0.180723	0.204819	0.210843	0.283133	0.277108
0.00959233	0.0527578	0.119904	0.146283	0.206235	0.201439	0.18705	0.268585	0.270983	0.270983
0.0114723	0.0439771	0.0783939	0.082218	0.185468	0.1587	0.219885	0.198853	0.210325	0.260038
0.00645161	0.0596774	0.0967742	0.130645	0.183871	0.198387	0.219355	0.253226	0.253226	0.290323
0.0134409	0.0564516	0.0954301	0.166667	0.159946	0.198925	0.229839	0.271505	0.290323	0.25
0.0124434	0.0622172	0.0904977	0.128959	0.173077	0.184389	0.202489	0.251131	0.271493	0.270362
0.0122075	0.0539166	0.104781	0.142421	0.169888	0.178026	0.234995	0.23703	0.269583	0.284842
0.0090009	0.049505	0.108011	0.143114	0.20072	0.227723	0.253825	0.253825	0.272727	0.29883
0.00561347	0.0457097	0.0874098	0.131516	0.177225	0.184443	0.206897	0.255012	0.291099	0.274258
0.00892193	0.0453532	0.0914498	0.146468	0.184387	0.206691	0.241636	0.233457	0.272862	0.296654
0.00671592	0.0369375	0.13096	0.199463	0.169913	0.255876	0.276024	0.29953	0.294829	0.308932
0.00955882	0.0426471	0.0911765	0.145588	0.168382	0.208824	0.228676	0.228676	0.269118	0.2875
0.00474684	0.0482595	0.0901899	0.135285	0.178797	0.19462	0.219937	0.246835	0.296677	0.272152
0.0095986	0.0506108	0.100349	0.146597	0.205061	0.21466	0.243455	0.269634	0.26178	0.292321
0.0105871	0.0461983	0.102021	0.124158	0.159769	0.172281	0.231954	0.222329	0.251203	0.276227
0.0129171	0.0548977	0.0904198	0.125942	0.172228	0.182992	0.194833	0.240043	0.276642	0.270183
0.0125313	0.0601504	0.0902256	0.154135	0.155388	0.185464	0.224311	0.246867	0.261905	0.250627
0.00442478	0.0589971	0.0929204	0.129794	0.172566	0.190265	0.20649	0.244838	0.235988	0.266962
0.0142096	0.0373002	0.0781528	0.0888099	0.179396	0.150977	0.204263	0.195382	0.22913	0.250444
0.00645161	0.0580645	0.107527	0.133333	0.193548	0.187097	0.189247	0.253763	0.215054	0.251613
0.00539084	0.0404313	0.0808625	0.107817	0.126685	0.167116	0.196765	0.210243	0.280323	0.250674
0.0140351	0.0280702	0.112281	0.119298	0.2	0.214035	0.266667	0.245614	0.277193	0.315789

## Sheet: Fig2F_Tlx3_photostim
6.45315e-05	6.45315e-05	6.45315e-05	6.45315e-05	2.98617e-06	5.43895e-09	2.79348e-12	4.04584e-16	1.65235e-20	1.90294e-25
0.000338886	0.000338886	0.000338886	0.000338886	2.98617e-06	5.43895e-09	2.79348e-12	4.04584e-16	1.65235e-20	1.90294e-25
0.00152215	0.00152215	0.00152215	0.000462323	2.98617e-06	5.43895e-09	2.79348e-12	4.04584e-16	1.65235e-20	1.90294e-25
0.00584767	0.00584767	0.00584767	0.000462323	2.98617e-06	5.43895e-09	2.79348e-12	4.04584e-16	1.65235e-20	1.90294e-25
0.0192146	0.0192146	0.0192146	0.000462323	2.98617e-06	5.43895e-09	2.79348e-12	4.04584e-16	1.65235e-20	1.90294e-25
0.0540008	0.0540008	0.020184	0.000462323	2.98617e-06	5.43895e-09	2.79348e-12	4.04584e-16	1.65235e-20	1.90294e-25
0.129805	0.129805	0.020184	0.000462323	2.98617e-06	5.43895e-09	2.79348e-12	4.04584e-16	1.65235e-20	1.90294e-25
0.266873	0.248485	0.020184	0.000462323	2.98617e-06	5.43895e-09	2.79348e-12	4.04584e-16	1.65235e-20	1.90294e-25
0.469289	0.248485	0.020184	0.000462323	2.98617e-06	5.43895e-09	2.79348e-12	4.04584e-16	1.65235e-20	1.90294e-25
0.705827	0.248485	0.020184	0.000462323	2.98617e-06	5.43895e-09	2.79348e-12	4.04584e-16	1.65235e-20	1.90294e-25
0.862628	0.248485	0.020184	0.000462323	2.98617e-06	5.43895e-09	2.79348e-12	4.04584e-16	1.65235e-20	1.90294e-25
0.862628	0.248485	0.020184	0.000462323	2.98617e-06	5.43895e-09	2.79348e-12	4.04584e-16	1.65235e-20	1.90294e-25
0.862628	0.248485	0.020184	0.000462323	2.98617e-06	5.43895e-09	2.79348e-12	4.04584e-16	1.65235e-20	1.90294e-25
0.756741	0.248485	0.020184	0.000462323	2.98617e-06	5.43895e-09	2.79348e-12	4.04584e-16	1.65235e-20	1.90294e-25
0.520972	0.248485	0.020184	0.000462323	2.98617e-06	5.43895e-09	2.79348e-12	4.04584e-16	1.65235e-20	1.90294e-25
0.306764	0.248485	0.020184	0.000462323	2.98617e-06	5.43895e-09	2.79348e-12	4.04584e-16	1.65235e-20	1.90294e-25
0.154495	0.154495	0.020184	0.000462323	2.98617e-06	5.43895e-09	2.79348e-12	4.04584e-16	1.65235e-20	1.90294e-25
0.06655	0.06655	0.020184	0.000462323	2.98617e-06	5.43895e-09	2.79348e-12	4.04584e-16	1.65235e-20	1.90294e-25
0.024519	0.024519	0.020184	0.000462323	2.98617e-06	5.43895e-09	2.79348e-12	4.04584e-16	1.65235e-20	1.90294e-25
0.00772645	0.00772645	0.00772645	0.000462323	2.98617e-06	5.43895e-09	2.79348e-12	4.04584e-16	1.65235e-20	1.90294e-25
0.00208247	0.00208247	0.00208247	0.000462323	2.98617e-06	5.43895e-09	2.79348e-12	4.04584e-16	1.65235e-20	1.90294e-25
0.000480065	0.000480065	0.000480065	0.000462323	2.98617e-06	5.43895e-09	2.79348e-12	4.04584e-16	1.65235e-20	1.90294e-25
9.46548e-05	9.46548e-05	9.46548e-05	9.46548e-05	2.98617e-06	5.43895e-09	2.79348e-12	4.04584e-16	1.65235e-20	1.90294e-25

## Sheet: Fig2F_Tlx3_product
9.48992e-07	1.66074e-06	7.35469e-06	6.4057e-06	5.26971e-07	9.7981e-10	7.08641e-13	9.37087e-17	3.82713e-21	5.38701e-26
1.02074e-06	1.42904e-05	2.55185e-05	4.18503e-05	4.22741e-07	9.82942e-10	5.72159e-13	8.53038e-17	4.67834e-21	5.27322e-26
1.46009e-05	8.03052e-05	0.000182512	6.76299e-05	6.15853e-07	1.09561e-09	5.22522e-13	1.08665e-16	4.47759e-21	5.15666e-26
6.70861e-05	0.000257163	0.000458421	3.80112e-05	5.5384e-07	8.6316e-10	6.14246e-13	8.04526e-17	3.4753e-21	4.94838e-26
0.000123965	0.00114668	0.00185947	6.04002e-05	5.4907e-07	1.07902e-09	6.12764e-13	1.02451e-16	4.18417e-21	5.52468e-26
0.000725817	0.00304843	0.00192616	7.70538e-05	4.77627e-07	1.08194e-09	6.4205e-13	1.09847e-16	4.79714e-21	4.75736e-26
0.00161522	0.00807611	0.00182661	5.96208e-05	5.16837e-07	1.00288e-09	5.65649e-13	1.01604e-16	4.48601e-21	5.14484e-26
0.00325786	0.0133975	0.0021149	6.58445e-05	5.07315e-07	9.68276e-10	6.56454e-13	9.58983e-17	4.45445e-21	5.42039e-26
0.00422403	0.0123012	0.00218009	6.6165e-05	5.99384e-07	1.23857e-09	7.09057e-13	1.02694e-16	4.5064e-21	5.68656e-26
0.00396214	0.0113582	0.00176428	6.08027e-05	5.29225e-07	1.00317e-09	5.77962e-13	1.03174e-16	4.80996e-21	5.21898e-26
0.00769631	0.0112696	0.00184582	6.77157e-05	5.5061e-07	1.12418e-09	6.75005e-13	9.4453e-17	4.50864e-21	5.64516e-26
0.00579334	0.00917842	0.0026433	9.22162e-05	5.07388e-07	1.3917e-09	7.71069e-13	1.21185e-16	4.8716e-21	5.87881e-26
0.00824571	0.0105971	0.00184031	6.73088e-05	5.02818e-07	1.13578e-09	6.38804e-13	9.25188e-17	4.44676e-21	5.47096e-26
0.00359213	0.0119918	0.00182039	6.25452e-05	5.3392e-07	1.05853e-09	6.14389e-13	9.98656e-17	4.90214e-21	5.1789e-26
0.00500061	0.012576	0.00202544	6.77751e-05	6.12347e-07	1.16752e-09	6.80089e-13	1.09089e-16	4.32552e-21	5.56271e-26
0.00324774	0.0114796	0.00205919	5.7401e-05	4.77097e-07	9.37027e-10	6.47959e-13	8.99507e-17	4.15075e-21	5.25645e-26
0.00199563	0.00848143	0.00182503	5.82258e-05	5.14303e-07	9.95286e-10	5.44263e-13	9.71175e-17	4.57108e-21	5.14143e-26
0.00083396	0.00400301	0.00182111	7.12603e-05	4.64016e-07	1.00873e-09	6.26608e-13	9.98784e-17	4.32758e-21	4.76928e-26
0.000108491	0.00144655	0.0018755	6.00065e-05	5.15312e-07	1.03484e-09	5.76825e-13	9.90573e-17	3.89935e-21	5.08013e-26
0.00010979	0.000288198	0.000603843	4.10589e-05	5.35707e-07	8.21155e-10	5.70605e-13	7.90483e-17	3.78602e-21	4.76581e-26
1.34353e-05	0.000120918	0.000223922	6.1643e-05	5.77968e-07	1.01761e-09	5.28659e-13	1.02669e-16	3.55344e-21	4.78805e-26
2.58795e-06	1.94096e-05	3.88193e-05	4.98461e-05	3.78302e-07	9.08934e-10	5.49661e-13	8.50607e-17	4.63192e-21	4.77018e-26
1.32849e-06	2.65698e-06	1.06279e-05	1.12922e-05	5.97234e-07	1.16413e-09	7.44929e-13	9.93714e-17	4.58019e-21	6.0093e-26

## Sheet: Fig2G_Sst_neighbors
0.00289	0.00867	0.0145	0.0173	0.0116	0.0173	0.0607	0.0347	0.0462	0.0347
0.00719	0.012	0.0216	0.0144	0.0312	0.024	0.0192	0.0216	0.0384	0.0432
0	0.0102	0.0122	0.0244	0.0305	0.0285	0.0366	0.0427	0.0447	0.0407
0.00522	0.0087	0.00348	0.0243	0.0226	0.0209	0.0209	0.0452	0.0226	0.0574
0	0.00933	0.0171	0.0109	0.0218	0.0171	0.0202	0.0311	0.0358	0.0342
0.00134	0.00668	0.024	0.0267	0.0227	0.0174	0.028	0.0307	0.0334	0.0494
0	0	0.0146	0.0158	0.0134	0.0182	0.0195	0.0353	0.0292	0.0353
0.00112	0.00899	0.0124	0.0213	0.0202	0.027	0.0326	0.0371	0.0303	0.0382
0	0.00834	0.0136	0.0167	0.0219	0.0344	0.0302	0.0313	0.0323	0.0365
0	0.0107	0.00583	0.0165	0.0224	0.0214	0.0321	0.0389	0.0457	0.0369
0.00272	0.0118	0.00454	0.0127	0.0263	0.0254	0.0254	0.0517	0.0345	0.0372
0	0.00248	0.019	0.0215	0.0166	0.0257	0.0257	0.0389	0.0513	0.0306
0.00186	0.0112	0.0028	0.0121	0.0242	0.0205	0.0252	0.0475	0.0354	0.0391
0.000994	0.0109	0.00696	0.0149	0.0229	0.0258	0.0348	0.0497	0.0467	0.0417
0	0.00979	0.0131	0.0207	0.025	0.0316	0.0316	0.0337	0.0337	0.0403
0.0012	0.00722	0.0132	0.0229	0.0229	0.0289	0.0349	0.0385	0.0385	0.0409
0	0.00402	0.0174	0.0161	0.0134	0.0228	0.0254	0.0375	0.0295	0.0348
0.00149	0.00746	0.0224	0.0328	0.0269	0.0224	0.0254	0.0358	0.0343	0.0522
0	0.00826	0.0231	0.0132	0.0231	0.0231	0.0281	0.0281	0.043	0.038
0.00375	0.0113	0.00563	0.0244	0.0244	0.0188	0.0225	0.0563	0.0281	0.0675
0.00215	0.0108	0.0129	0.028	0.0323	0.0344	0.0323	0.0516	0.0387	0.043
0.00506	0.0101	0.0228	0.0101	0.0304	0.0203	0.0278	0.0177	0.0405	0.0456
0.00645	0.0129	0.0194	0.0258	0.0226	0.0258	0.071	0.0484	0.0645	0.0484

## Sheet: Fig2G_Sst_photostim
0.000144456	0.000144456	0.000144456	0.000144456	6.27937e-07	5.35255e-10	1.10727e-13	5.55893e-18	6.77295e-23	2.00268e-28
0.000680418	0.000680418	0.000680418	0.00017878	6.27937e-07	5.35255e-10	1.10727e-13	5.55893e-18	6.77295e-23	2.00268e-28
0.00276073	0.00276073	0.00276073	0.00017878	6.27937e-07	5.35255e-10	1.10727e-13	5.55893e-18	6.77295e-23	2.00268e-28
0.00964896	0.00964896	0.00964896	0.00017878	6.27937e-07	5.35255e-10	1.10727e-13	5.55893e-18	6.77295e-23	2.00268e-28
0.0290499	0.0290499	0.0123529	0.00017878	6.27937e-07	5.35255e-10	1.10727e-13	5.55893e-18	6.77295e-23	2.00268e-28
0.0753381	0.0753381	0.0123529	0.00017878	6.27937e-07	5.35255e-10	1.10727e-13	5.55893e-18	6.77295e-23	2.00268e-28
0.168303	0.168303	0.0123529	0.00017878	6.27937e-07	5.35255e-10	1.10727e-13	5.55893e-18	6.77295e-23	2.00268e-28
0.323875	0.207141	0.0123529	0.00017878	6.27937e-07	5.35255e-10	1.10727e-13	5.55893e-18	6.77295e-23	2.00268e-28
0.536871	0.207141	0.0123529	0.00017878	6.27937e-07	5.35255e-10	1.10727e-13	5.55893e-18	6.77295e-23	2.00268e-28
0.766602	0.207141	0.0123529	0.00017878	6.27937e-07	5.35255e-10	1.10727e-13	5.55893e-18	6.77295e-23	2.00268e-28
0.842968	0.207141	0.0123529	0.00017878	6.27937e-07	5.35255e-10	1.10727e-13	5.55893e-18	6.77295e-23	2.00268e-28
0.842968	0.207141	0.0123529	0.00017878	6.27937e-07	5.35255e-10	1.10727e-13	5.55893e-18	6.77295e-23	2.00268e-28
0.842968	0.207141	0.0123529	0.00017878	6.27937e-07	5.35255e-10	1.10727e-13	5.55893e-18	6.77295e-23	2.00268e-28
0.716871	0.207141	0.0123529	0.00017878	6.27937e-07	5.35255e-10	1.10727e-13	5.55893e-18	6.77295e-23	2.00268e-28
0.485486	0.207141	0.0123529	0.00017878	6.27937e-07	5.35255e-10	1.10727e-13	5.55893e-18	6.77295e-23	2.00268e-28
0.283217	0.207141	0.0123529	0.00017878	6.27937e-07	5.35255e-10	1.10727e-13	5.55893e-18	6.77295e-23	2.00268e-28
0.142322	0.142322	0.0123529	0.00017878	6.27937e-07	5.35255e-10	1.10727e-13	5.55893e-18	6.77295e-23	2.00268e-28
0.0616067	0.0616067	0.0123529	0.00017878	6.27937e-07	5.35255e-10	1.10727e-13	5.55893e-18	6.77295e-23	2.00268e-28
0.0229717	0.0229717	0.0123529	0.00017878	6.27937e-07	5.35255e-10	1.10727e-13	5.55893e-18	6.77295e-23	2.00268e-28
0.00737846	0.00737846	0.00737846	0.00017878	6.27937e-07	5.35255e-10	1.10727e-13	5.55893e-18	6.77295e-23	2.00268e-28
0.00204148	0.00204148	0.00204148	0.00017878	6.27937e-07	5.35255e-10	1.10727e-13	5.55893e-18	6.77295e-23	2.00268e-28
0.000486555	0.000486555	0.000486555	0.00017878	6.27937e-07	5.35255e-10	1.10727e-13	5.55893e-18	6.77295e-23	2.00268e-28
9.98909e-05	9.98909e-05	9.98909e-05	9.98909e-05	6.27937e-07	5.35255e-10	1.10727e-13	5.55893e-18	6.77295e-23	2.00268e-28

## Sheet: Fig2G_Sst_product
4.17502e-07	1.2525e-06	2.08751e-06	2.50501e-06	7.25938e-09	9.28187e-12	6.7204e-15	1.92795e-19	3.132e-24	6.94571e-30
4.89509e-06	8.15849e-06	1.46853e-05	2.57237e-06	1.9576e-08	1.28358e-11	2.12425e-15	1.19977e-19	2.59873e-24	8.64466e-30
0	2.80562e-05	3.36675e-05	4.36049e-06	1.91444e-08	1.52308e-11	4.05098e-15	2.37271e-19	3.02855e-24	8.14097e-30
5.03424e-05	8.3904e-05	3.35616e-05	4.3529e-06	1.41968e-08	1.11705e-11	2.31082e-15	2.5136e-19	1.53128e-24	1.14936e-29
0	0.000271072	0.000211325	1.94628e-06	1.3672e-08	9.15677e-12	2.23864e-15	1.72906e-19	2.42267e-24	6.85209e-30
0.000100585	0.000502925	0.000296865	4.77383e-06	1.42522e-08	9.29013e-12	3.10449e-15	1.70702e-19	2.26066e-24	9.89308e-30
0	0	0.000180334	2.82742e-06	8.40305e-09	9.76742e-12	2.15526e-15	1.96118e-19	1.9775e-24	7.06541e-30
0.000363905	0.00186194	0.000152676	3.81665e-06	1.26998e-08	1.44338e-11	3.60795e-15	2.06118e-19	2.05471e-24	7.65069e-30
0	0.00172798	0.000167453	2.98277e-06	1.37504e-08	1.84186e-11	3.34836e-15	1.73898e-19	2.18938e-24	7.30905e-30
0	0.00221434	7.20286e-05	2.9536e-06	1.40355e-08	1.14437e-11	3.551e-15	2.16091e-19	3.09357e-24	7.39571e-30
0.00229483	0.00244359	5.60476e-05	2.27125e-06	1.65247e-08	1.35999e-11	2.81338e-15	2.87531e-19	2.3355e-24	7.45099e-30
0	0.000514423	0.000235196	3.84791e-06	1.03963e-08	1.37358e-11	2.8415e-15	2.16283e-19	3.47618e-24	6.13404e-30
0.00157124	0.00231658	3.45375e-05	2.16602e-06	1.52156e-08	1.09745e-11	2.78623e-15	2.64218e-19	2.39862e-24	7.83901e-30
0.000712595	0.00226496	8.59546e-05	2.6657e-06	1.43564e-08	1.38336e-11	3.85232e-15	2.76289e-19	3.1643e-24	8.36109e-30
0	0.00202859	0.0001613	3.69621e-06	1.57155e-08	1.68905e-11	3.4941e-15	1.87516e-19	2.28467e-24	8.06302e-30
0.000340815	0.0014956	0.000163516	4.08763e-06	1.43572e-08	1.54586e-11	3.86411e-15	2.14062e-19	2.60811e-24	8.19388e-30
0	0.000571572	0.000214977	2.87197e-06	8.40612e-09	1.21812e-11	2.81634e-15	2.08367e-19	1.99471e-24	6.9705e-30
9.19504e-05	0.000459752	0.000276557	5.87039e-06	1.68699e-08	1.19833e-11	2.80948e-15	1.99126e-19	2.32504e-24	1.04618e-29
0	0.000189849	0.000285852	2.36403e-06	1.45308e-08	1.23861e-11	3.11133e-15	1.56201e-19	2.91069e-24	7.61349e-30
2.76865e-05	8.30596e-05	4.15298e-05	4.36049e-06	1.53155e-08	1.00423e-11	2.49291e-15	3.12885e-19	1.90608e-24	1.35265e-29
4.39028e-06	2.19514e-05	2.63417e-05	4.99815e-06	2.0256e-08	1.84174e-11	3.57183e-15	2.86913e-19	2.62179e-24	8.61368e-30
2.46357e-06	4.92714e-06	1.10861e-05	1.81043e-06	1.90766e-08	1.08406e-11	3.08353e-15	9.85127e-20	2.74347e-24	9.12613e-30
6.44457e-07	1.28891e-06	1.93337e-06	2.57783e-06	1.41792e-08	1.3813e-11	7.85802e-15	2.68981e-19	4.36964e-24	9.69038e-30

## Sheet: Fig2H_offtarget_vs_density
Cre	effector	avg_dens	xy_sig	z_sig	off_est
RorbKv	AAV	19813.1	6.77531	27.6356	0.839901
SstKv	AAV	4095.65	5.04223	15.5339	0.027499
Tlx3Kv	AAV	22330.5	5.33278	15.1767	0.214073
PenkKv	AAV	9255.7	5.44462	21.1104	0.129875
PvalbKv	AAV	3349.17	9.57963	23.2244	0.129822
RorbAi	Ai167	4424.81	6.64958	24.7293	0.0606265
Ntsr1Ai	Ai167	10094	10.0638	28.3702	0.942927
Scnn1aAi	Ai167	1730	6.47351	20.5529	0.0285778
SstAi	Ai167	1429.94	6.09054	22.7669	0.0124954

## Sheet: Fig2H_offT_v_dens_homogenous
densities(cell/mm3)	1000	2000	3000	4000	5000	6000	7000	8000	9000	10000	11000	12000	13000	14000	15000	16000	17000	18000	19000	20000	21000	22000	23000	24000	25000	26000	27000	28000	29000	30000	31000	32000	33000	34000	35000	36000	37000	38000	39000	40000	41000	42000	43000	44000	45000	46000	47000	48000	49000
high_res_offT	0.00912781	0.0182556	0.0273834	0.0365112	0.045639	0.0547669	0.0638947	0.0730225	0.0821503	0.0912781	0.100406	0.109534	0.118662	0.127789	0.136917	0.146045	0.155173	0.164301	0.173428	0.182556	0.191684	0.200812	0.20994	0.219067	0.228195	0.237323	0.246451	0.255579	0.264706	0.273834	0.282962	0.29209	0.301218	0.310346	0.319473	0.328601	0.337729	0.346857	0.355985	0.365112	0.37424	0.383368	0.392496	0.401624	0.410751	0.419879	0.429007	0.438135	0.447263
low_res_offT	0.0656742	0.131348	0.197023	0.262697	0.328371	0.394045	0.45972	0.525394	0.591068	0.656742	0.722416	0.788091	0.853765	0.919439	0.985113	1.05079	1.11646	1.18214	1.24781	1.31348	1.37916	1.44483	1.51051	1.57618	1.64186	1.70753	1.7732	1.83888	1.90455	1.97023	2.0359	2.10158	2.16725	2.23292	2.2986	2.36427	2.42995	2.49562	2.56129	2.62697	2.69264	2.75832	2.82399	2.88967	2.95534	3.02101	3.08669	3.15236	3.21804
[truncated: 114 more columns]

[truncated: 2 more sheets: Fig2I_responseProb_v_cnxProb, transgenic_characterization_lin]
