# Supplementary material for: Synaptic connectivity to L2/3 of primary visual cortex measured by two-photon optogenetic stimulation
Source: eLife. 2022 Jan 21;11:e71103. doi: 10.7554/eLife.71103 (PMC8824465; doi:10.7554/eLife.71103)
Supplement: Figure 3—figure supplement 1—source data 1. [file elife-71103-fig3-figsupp1-data1.xlsx]

## Sheet: Fig3_S1_data
experiment	headstage	cell_class	cell_layer	cell_reporter	cell_subclass	internal	presynapticCre	presynapticEffector	exp_id	toPia	toWM	post_depth	Ri	tau	sag	rheo	peak	height	FWHM	trough	updown	fi_slope	adaptation	average_rate	rest	Cm	u1	u2	Kcluster
2018_02_28_exp2_TH	0	interneuron	4	negative	unknown	standard	Scnn1a	Ai167	2018_02_28_exp2_TH				1.36125e+08	6.19769	0.066853	150	6.96875	63.4375	0.628793	-56.4688	1.8042	0.62923	0.0013437	18.1557	-68.0144	4.55e-08	2.9571	-0.689755	1
2018_05_07_exp1_CAB	2	interneuron	5	positive	Sst	standard	Sst	Ai167	2018_05_07_exp1_CAB			50	2.86365e+08	19.5582	0.112712	70	34.4062	87.7188	1.08124	-53.3125	2.01786	0.611397	0.1552	22.4464	-45.4944	6.83e-08	-0.612588	-1.13756	2
2018_05_07_exp4_AB	1	interneuron	5	positive	Sst	standard	Sst	Ai167	2018_05_07_exp4_AB			75	2.92888e+08	24.6177	0.167636	70	25.9688	77.75	0.875862	-51.7812	2.05691	0.225189	0.178332	19.6043	-63.3968	8.41e-08	-0.747033	-0.998831	2
2018_05_08_exp1_AB	1	interneuron	5	positive	Sst	standard	Sst	Ai167	2018_05_08_exp1_AB			73	182427675	19.5695	0.0600306	90	21.2812	82.2812	0.954815	-61	1.98319	0.313329	0.00795127	21.231	-70.8838	1.07e-07	-0.142146	-0.015569	2
2018_08_21_exp2_CAB	1	interneuron	2	negative	unknown	standard	Scnn1a	Ai167	2018_08_21_exp2_CAB	301		57	1.20051e+08	10.167	0.044418	130	4.59375	49.0625	1.11147	-44.4688	2.53968	0.17305	0.190359	7.33439	-56.6079	8.47e-08	1.06899	-0.639835	2
2018_08_30_exp2_TH	3	interneuron	5	negative	unknown	standard	Ntsr1	Ai167	2018_08_30_exp2_TH				2.42113e+08	26.5416	0.0644872	30	27.0625	82.7812	0.895644	-55.7188	2.57983	0.470561	0.130944	12.1944	-71.9613	1.1e-07	-0.420623	0.0161308	2
2018_09_06_exp3_TH	1	interneuron	4	negative	unknown	standard	Sst	Ai167	2018_09_06_exp3_TH			50	2.3108e+08	14.3183	0.0721343	70	33	89.375	0.701185	-56.375	2.02367	0.591716	0.702296	25.2679	-56.022	6.2e-08	-0.909753	-0.611527	2
2018_10_18_exp1_CAB	1	interneuron	2	positive	Sst	standard	Sst	Chrimson-Kv/H2b-mTFP	2018_10_18_exp1_CAB				2.5714e+08	20.7418	0.0669818	70	7.65625	55.875	0.951894	-48.2188	1.91429	0.607574	0.0440316	17.724	-62.6617	8.07e-08	1.03287	-1.06645	2
2018_10_19_exp1_CAB	3	interneuron	5	positive	Sst	standard	Sst	Chrimson-Kv/H2b-mTFP	2018_10_19_exp1_CAB				2.37494e+08	13.4456	0.16056	30	14.3438	71.875	0.949167	-57.5312	1.62393	0.0843925	0.0253408	23.6928	-47.0168	5.66e-08	-0.204494	-1.48753	2
2018_11_15_exp2_TH	1	interneuron	2	negative	unknown	standard	Sst	Ai167	2018_11_15_exp2_TH	210	749	66	6.58552e+07	4.90053	0.101717	230	26.8438	84.5	0.444929	-57.6562	1.77358	0.607793	-0.0661472	12.1559	-66.1013	7.44e-08	5.55432	-1.07643	1
2018_11_19_exp1_CAB	1	interneuron	5	positive	Sst	standard	Sst	Ai167	2018_11_19_exp1_CAB			71	1.91066e+08	12.9219	0.0159368	170	35.4062	92.9062	0.739263	-57.5	1.89503	0.97312	0.00790331	52.3596	-61.8355	6.76e-08	4.99702	-1.91442	1
2018_11_30_exp2_TH	2	interneuron	2	negative	unknown	standard	Rorb	Ai167	2018_11_30_exp2_TH	185	749	96	9.48826e+07	3.68021	0.0532389	390	7.90625	64.4062	0.406887	-56.5	1.65351	0.586035	0.00622286	19.7564	-64.3327	3.88e-08	3.62378	-0.921353	1
2018_12_13_exp1_CAB	1	interneuron	2	positive	Sst	standard	Sst	ChrimsonR_kv_eyfp_AAV	2018_12_13_exp1_CAB				3.89123e+08	32.3201	0.108883	30	24.4375	80.4062	1.10152	-55.9688	2.03571	0.422772	0.0158025	20.7627	-56.503	8.31e-08	-0.380257	-1.04957	2
2019_01_24_exp1_TH	0	interneuron	2	negative	unknown	standard	Rorb	Ai167	2019_01_24_exp1_TH	266	683	68	114788136	6.24505	0.033004	130	19.5312	74.5312	0.631044	-55	1.65896	0.786662	0.00114757	52.6704	-70.4213	5.44e-08	3.84298	-2.25478	1
2019_02_15_exp1_TH	1	interneuron	2	negative	unknown	standard	Tlx3	ChrimsonR_kv_eyfp_AAV	2019_02_15_exp1_TH	231	822	44	5.40783e+07	11.4992	0.0345873	270	17	63.2812	0.529297	-46.2812	1.56395	0.637305	0.00341813	44.2032	-68.7472	2.13e-07	3.99499	-0.461624	1
2019_02_15_exp1_TH	3	interneuron	2	negative	unknown	standard	Tlx3	ChrimsonR_kv_eyfp_AAV	2019_02_15_exp1_TH	220	809	65	178420482	15.031	0.115471	110	-2.59375	42.4375	0.754995	-45.0312	1.87342	0.277399	0.0726427	21.2514	-66.1737	8.42e-08	1.21452	-0.963686	2
2019_02_15_exp2_TH	0	interneuron	4	negative	unknown	standard	Tlx3	ChrimsonR_kv_eyfp_AAV	2019_02_15_exp2_TH	379	628	77	9.19797e+07	4.955	0.0631852	270	29.7188	94.0625	0.390691	-64.3438	1.52099	0.79787	0.00203161	112.146	-77.8748	5.39e-08	3.89464	-2.23451	1
2019_02_18_exp1_TH	1	interneuron	2	negative	unknown	standard	Tlx3	ChrimsonR_kv_eyfp_AAV	2019_02_18_exp1_TH	241	770	65	164391722	14.8054	0.330757	130	42.0938	101.344	0.551526	-59.25	1.77308	0.372902	0.0402908	18.4956	-65.469	9.01e-08	-1.60685	-1.40644	2
2019_02_20_exp1_TH	1	interneuron	2	negative	unknown	standard	Sst	ChrimsonR_kv_eyfp_AAV	2019_02_20_exp1_TH	197	823	68	3.53926e+07	8.77212	0.0697706	550	36.5	76.5938	0.499534	-40.0938	1.55955	0.845738	-0.0110352	38.2942	-63.1665	2.48e-07	4.09269	-0.483011	1
2019_02_28_exp1_TH	1	interneuron	2	negative	unknown	standard	Tlx3	ChrimsonR_kv_eyfp_AAV	2019_02_28_exp1_TH	209	769	57	6.15157e+07	4.83401	0.0403056	370	18.0625	66.0938	0.615001	-48.0312	1.66118	0.758232	0.015356	41.3405	-68.314	7.86e-08	3.50807	-1.51141	1
2019_03_04_exp1_TH	0	interneuron	5	negative	unknown	standard	Sst	ChrimsonR_kv_eyfp_AAV	2019_03_04_exp1_TH	624	325	55	345806295	14.3063	0.092297	30	27.5625	81.25	1.28537	-53.6875	3.65161	0.69537	0.0316138	20.9194	-64.0336	4.14e-08	-0.235548	1.02587	3
2019_03_12_exp1_TH	0	interneuron	6	positive	Sst	standard	Sst	ChrimsonR_kv_eyfp_AAV	2019_03_12_exp1_TH	702	317	51	229874740	22.4967	0.292128	90	31.25	92.9062	1.33076	-61.6562	1.90323	0.309679	0.0129711	16.2461	-55.2479	9.79e-08	-1.30665	-1.50062	2
2019_03_15_exp1_TH	1	interneuron	2	negative	unknown	standard	Ntsr1	Ai167	2019_03_15_exp1_TH	158	898	73	146796285	11.8896	0.169146	130	46.9688	98.5312	0.962448	-51.5625	2.79339	0.129581	0.227473	6.54624	-59.945	8.1e-08	-1.22136	-0.39825	3
2019_03_19_exp2_TH	2	interneuron	6	negative	unknown	standard	Ntsr1	Ai167	2019_03_19_exp2_TH	712	238	48	227222898	13.8029	0.0531729	50	30.125	75.4688	1.63498	-45.3438	3.12698	0.375738	0.0314558	13.886	-71.0305	6.07e-08	0.345157	1.08207	3
2019_03_20_exp1_TH	1	interneuron	2	negative	unknown	standard	Rorb	ChrimsonR_kv_eyfp_AAV	2019_03_20_exp1_TH	138	789	46	118965402	5.89696	0.0357933	150	11.5	68.7812	0.865652	-57.2812	2.03756	0.590065	0.0266256	32.2067	-73.8683	4.96e-08	3.21175	-0.800751	1
2019_04_05_exp1_TH	1	interneuron	2	negative	unknown	standard	Rorb	ChrimsonR_kv_eyfp_AAV	2019_04_05_exp1_TH	224	875	50	8.96415e+07	7.69298	0.0514882	190	23.5312	80.5312	0.620492	-57	1.58398	0.646752	-0.0185965	23.7952	-74.2268	8.58e-08	5.33438	-1.0434	1
2019_04_09_exp1_TH	3	interneuron	2	positive	Sst	standard	Sst	ChrimsonR_kv_eyfp_AAV	2019_04_09_exp1_TH	267	774	95	150333190	17.0556	0.141372	150	26.6562	78	0.742713	-51.3438	1.90909	0.411457	0.0126957	25.2242	-60.0111	1.13e-07	0.0492976	-0.490577	2
2019_04_12_exp1_TH	0	interneuron	4	positive	Sst	standard	Sst	ChrimsonR_kv_eyfp_AAV	2019_04_12_exp1_TH	390	591	56	200308862	18.4652	0.368027	110	31.75	89.625	0.634104	-57.875	1.72139	0.295499	0.13995	11.1581	-67.8704	9.22e-08	-1.48789	-1.13934	2
2019_04_15_exp2_TH	3	interneuron	5	positive	Sst	standard	Sst	ChrimsonR_kv_eyfp_AAV	2019_04_15_exp2_TH	597	394	53	113644315	11.0744	0.0830296	190	34.0625	89.5625	0.466007	-55.5	1.64982	0.264954	0.13901	10.5982	-74.6183	9.74e-08	5.44758	-0.814469	1
2019_05_06_exp1_TH	0	interneuron	4	positive	Sst	standard	Sst	ChrimsonR_kv_eyfp_AAV	2019_05_06_exp1_TH	472	525	55	284433611	18.8265	0	50	12.7812	64.9688	0.692023	-52.1875	2.00787	0.105343	0.134152	28.2675	-51.0799	6.62e-08	0.353344	-0.960745	2
2019_05_06_exp2_TH	2	interneuron	4	positive	Sst	standard	Sst	ChrimsonR_kv_eyfp_AAV	2019_05_06_exp2_TH	412	581	57	308614105	20.3005	0.0427936	50	19	75.8125	0.662765	-56.8125	2.25161	0.203327	0.0684027	14.3069	-58.3352	6.58e-08	-0.0347838	-0.791565	2
2019_05_09_exp2_TH	2	interneuron	4	negative	unknown	standard	Ntsr1	Ai167	2019_05_09_exp2_TH	472	489	82	116189749	4.98034	0.0814067	250	17.8438	74	0.602895	-56.1562	1.67544	0.69044	-0.0017321	54.1873	-71.3645	4.29e-08	3.95683	-2.0731	1
2019_05_17_exp2_TH	1	interneuron	4	positive	Sst	standard	Sst	ChrimsonR_kv_eyfp_AAV	2019_05_17_exp2_TH	430	553	70	183145773	19.2376	0.143456	90	14.2188	67.3125	0.847094	-53.0938	1.92982	0.341531	0.0457422	17.2141	-60.9393	1.05e-07	0.34893	-0.711011	2
2019_05_29_exp2_TH	0	interneuron	2	negative	unknown	standard	Rorb	ChrimsonR_kv_eyfp_AAV	2019_05_29_exp2_TH	248	753	49	106547965	6.46717	0.0637637	250	22.125	74.0938	0.445145	-51.9688	1.48062	0.828092	0.0580981	31.5893	-67.6208	6.07e-08	4.20111	-1.66019	1
2019_06_05_exp2_TH	0	interneuron	2	negative	unknown	standard	Rorb	ChrimsonR_kv_eyfp_AAV	2019_06_05_exp2_TH	219	791	56	328107607	22.4186	0.256044	50	41.7188	100.875	0.737395	-59.1562	1.94624	0.244533	0.014726	21.2182	-59.5075	6.83e-08	-1.11573	-1.74335	2
2019_06_05_exp2_TH	2	interneuron	2	negative	unknown	standard	Rorb	ChrimsonR_kv_eyfp_AAV	2019_06_05_exp2_TH	216	816	64	251399593	17.7667	0.100053	70	21.6875	66.2812	0.762573	-44.5938	2.38723	0.11181	0.329297	10.0664	-58.4494	7.07e-08	-0.605124	-0.619407	2
2019_07_22_exp1_TH	1	interneuron	2	negative	unknown	standard	Rorb	Ai167	2019_07_22_exp1_TH	202	806	49	145075028	7.25481	0.0735945	130	22.0938	76.8125	1.62378	-54.7188	3.14876	0.170592	0.0118377	9.46074	-73.3852	5e-08	0.495975	0.780993	3
2019_08_09_exp3_TH	0	interneuron	2	negative	unknown	standard	Tlx3	ChrimsonR_kv_eyfp_AAV	2019_08_09_exp3_TH	198	744	57	5.39938e+07	3.4284	0.0735079	310	20.25	75.8438	0.451222	-55.5938	1.5497	0.994517	0.00353952	52.4602	-69.726	6.35e-08	3.91523	-1.95521	1
2020_01_31_exp1_TH	1	interneuron	5	negative	unknown	standard	Sst	Ai167	2020_01_31_exp1_TH	665	355	80	219804596	20.0589	0.137345	70	28.875	69.5938	1.17621	-40.7188	2.37423	0.270674	0.0918053	10.2038	-68.977	9.13e-08	0.205839	0.996339	3
2020_02_03_exp1_TH	3	interneuron	5	negative	unknown	standard	Sst	Ai167	2020_02_03_exp1_TH	648	410	40	3.48755e+08	21.4267	0.240976	30	40.0625	96.0312	1.53023	-55.9688	4.06164	0.17887	0.065769	12.9309	-55.9521	6.14e-08	-0.504734	1.25043	3
2020_02_03_exp2_TH	1	interneuron	5	negative	unknown	standard	Sst	Ai167	2020_02_03_exp2_TH	716	265	42	3.68581e+08	15.3986	0.123491	30	30.75	86.125	1.19136	-55.375	3.67416	0.2708	0.0508301	16.0036	-60.522	4.18e-08	-0.219367	1.2029	3
2020_02_03_exp3_TH	1	interneuron	5	negative	unknown	standard	Sst	Ai167	2020_02_03_exp3_TH	568	392	33	3.13085e+08	25.5643	0.123673	30	40.4375	81.5625	1.29042	-41.125	4.01399	0.141965	0.242513	8.07778	-66.3594	8.17e-08	-0.0810114	1.26422	3
2020_02_18_exp1_TH	0	interneuron	5	negative	unknown	standard	Sst	ChrimsonR_kv_eyfp_AAV	2020_02_18_exp1_TH	703	271	69	9.11819e+07	6.1509	0.0823435	310	20.55	72.95	0.476721	-52.4	1.82061	1.03165	-0.00765922	33.4614	-57.6053	6.75e-08	4.02424	-1.47557	1
2020_02_19_exp1_TH	0	interneuron	2	negative	unknown	standard	Sst	ChrimsonR_kv_eyfp_AAV	2020_02_19_exp1_TH	205	756	23	8.85325e+07	2.28419	0.0454315	210	5.175	56.0437	1.36348	-50.8687	3.30843	0.239295	-0.100713	9.99979	-40.0477	2.58e-08	0.975796	-0.0809156	3
2020_02_26_exp1_TH	0	interneuron	2	negative	unknown	standard	Sst	ChrimsonR_kv_eyfp_AAV	2020_02_26_exp1_TH	188	714	40	113136283	8.30879	0.03211	190	6.71875	64.4937	0.754205	-57.775	1.84122	0.599083	0.00288104	30.1681	-72.7012	7.34e-08	3.07482	-0.841883	1
2020_02_26_exp2_TH	3	interneuron	2	negative	unknown	standard	Sst	ChrimsonR_kv_eyfp_AAV	2020_02_26_exp2_TH	285	589	47	84455485	6.74173	0.0358386	210	23.9937	79.8	0.67119	-55.8062	1.76596	0.799303	0.00497483	36.0738	-74.1419	7.98e-08	4.70435	-1.62674	1
2020_05_21_exp1_TH	3	interneuron	2	negative	unknown	standard	Pvalb	ChrimsonR_kv_eyfp_AAV	2020_05_21_exp1_TH	236	610	63	1.36303e+08	9.81351	0.247073	170	20.9187	82.55	0.574355	-61.6312	1.74425	0.387424	0.0135343	16.6077	-58.5788	7.2e-08	-1.34665	-1.61917	2
2020_05_26_exp2_TH	3	interneuron	2	negative	unknown	standard	Penk	ChrimsonR_kv_eyfp_AAV	2020_05_26_exp2_TH	171	796	64	1.29778e+08	6.75733	0.0811647	150	27.9625	84.6938	0.772025	-56.7313	2.03731	0.593197	0.00392476	33.8005	-72.8252	5.21e-08	5.08094	-1.7423	1
2020_05_27_exp3_TH	0	interneuron	2	negative	unknown	standard	Penk	ChrimsonR_kv_eyfp_AAV	2020_05_27_exp3_TH	185	692	65	1.36332e+08	7.02009	0.0183656	170	-2.83125	40.225	1.0486	-43.0562	2.13253	0.748932	0.00339506	33.0356	-66.9714	5.15e-08	2.51712	-1.23696	1
2020_05_28_exp2_TH	0	interneuron	2	negative	unknown	standard	Rorb	ChrimsonR_kv_eyfp_AAV	2020_05_28_exp2_TH	235	665	52	7.74855e+07	6.87324	0.111923	370	18.3125	78.2812	0.485097	-59.9688	1.58644	0.6366	0.0378365	21.5066	-67.9505	8.87e-08	4.66977	-0.720622	1
2020_05_28_exp2_TH	1	interneuron	2	negative	unknown	standard	Rorb	ChrimsonR_kv_eyfp_AAV	2020_05_28_exp2_TH	240	660	48	7.43335e+07	5.68235	0.0146782	270	17.6125	70.8375	0.574928	-53.225	1.86628	0.446123	0.000678058	32.1572	-74.362	7.64e-08	4.09371	-1.00099	1
2020_05_29_exp1_TH	2	interneuron	2	negative	unknown	standard	Tlx3	ChrimsonR_kv_eyfp_AAV	2020_05_29_exp1_TH	197	695	78	2.92911e+08	19.7429	0.269043	70	16.4187	72.9187	0.800699	-56.5	2.1303	0.245206	0.0390546	15.4829	-60.9573	6.74e-08	-0.780622	-1.57279	2
2020_06_11_exp2_TH	1	interneuron	2	negative	unknown	standard	Rorb	Ai167	2020_06_11_exp2_TH	240	687	52	9.78759e+07	7.07831	0.037328	230	24.5437	80.7562	0.665823	-56.2125	1.9671	0.281744	0.00695313	38.1083	-68.934	7.23e-08	4.71487	-1.35789	1
2020_07_02_exp1_TH	2	interneuron	5	positive	Sst	standard	Sst	ChrimsonR_kv_eyfp_AAV	2020_07_02_exp1_TH	542	341	50	308055813	17.6217	0.196852	30	15.2	66.4125	1.15038	-51.2125	2.09587	0.48593	0.0255277	28.0924	-59.9892	5.72e-08	-0.00563356	-1.25222	2
2020_07_02_exp3_TH	0	interneuron	5	negative	unknown	standard	Sst	ChrimsonR_kv_eyfp_AAV	2020_07_02_exp3_TH	495	410	82	166761403	7.12757	0.0362644	130	13.5	68.7562	0.653407	-55.2562	1.88102	1.10019	0.00300386	75.7073	-68.8381	4.27e-08	3.6073	-2.14517	1
2020_07_02_exp4_TH	2	interneuron	5	positive	Sst	standard	Sst	ChrimsonR_kv_eyfp_AAV	2020_07_02_exp4_TH	636	334	59	3.61978e+08	19.3863	0.0994415	30	-1.1125	48.8812	0.936443	-49.9937	2.30104	0.213311	0.0837057	18.4835	-64.9721	5.36e-08	0.823032	-0.916586	2
2020_07_03_exp2_TH	1	interneuron	2	negative	unknown	standard	Rorb	ChrimsonR_kv_eyfp_AAV	2020_07_03_exp2_TH	219	693	66	5.5011e+07	5.40456	0.212851	550	28.5437	81.8875	0.45164	-53.3438	1.71925	0.345723	-0.0290877	3.76511	-57.1079	9.82e-08	4.43056	-0.630611	1
2020_07_03_exp4_TH	1	interneuron	2	negative	unknown	standard	Tlx3	ChrimsonR_kv_eyfp_AAV	2020_07_03_exp4_TH	200	639	65	2.60728e+08	15.5335	0.252075	70	31.375	76.5	1.1886	-45.125	4.40984	0.112366	0.0502124	9.04307	-56.6432	5.96e-08	-0.321837	1.34642	3
2020_07_10_exp2_TH	0	interneuron	2	negative	unknown	standard	Penk	ChrimsonR_kv_eyfp_AAV	2020_07_10_exp2_TH	275	647	82	51688914	5.49437	0.0547711	490	26.6938	83.9062	0.407109	-57.2125	1.51495	0.7064	0.00166347	32.512	-73.8926	1.06e-07	4.69104	-0.802961	1
2020_07_10_exp2_TH	1	interneuron	2	negative	unknown	standard	Penk	ChrimsonR_kv_eyfp_AAV	2020_07_10_exp2_TH	241	681	70	3.1053e+08	19.4954	0.0657624	30	30.425	81.05	1.14522	-50.625	2.74165	0.194397	0.0473484	15.2444	-71.5603	6.28e-08	-0.0285915	0.82934	3
2020_07_19_exp1_TH	1	interneuron	2	positive	Pvalb	standard	Pvalb	ChrimsonR_kv_eyfp_AAV	2020_07_19_exp1_TH	177	717	68	1.19178e+08	8.32367	0.0295808	150	13.2562	61.7125	0.866113	-48.4562	1.71344	0.604183	0.00879086	25.9536	-66.1745	6.98e-08	2.89195	-1.15358	1
2020_07_19_exp2_TH	2	interneuron	2	negative	unknown	standard	Pvalb	ChrimsonR_kv_eyfp_AAV	2020_07_19_exp2_TH	163	734	74	1.94687e+08	15.0219	0.0832345	110	13.2875	64.6438	0.880102	-51.3563	2.68682	0.179336	0.0694184	12.6992	-61.0232	7.72e-08	0.682176	-0.504471	2
2020_07_23_exp1_TH	2	interneuron	2	positive	Pvalb	standard	Pvalb	ChrimsonR_kv_eyfp_AAV	2020_07_23_exp1_TH	133	832	88	1.07037e+08	7.48589	0.0352797	290	10.1375	49.2562	1.03903	-39.1187	2.21895	0.698783	0.0065216	34.8175	-67.9583	6.99e-08	2.56651	-1.32772	1
2020_07_24_exp2_TH	0	interneuron	2	negative	unknown	standard	Pvalb	ChrimsonR_kv_eyfp_AAV	2020_07_24_exp2_TH	192	704	63	8.30726e+07	6.10931	0.180781	250	20.8813	74.75	1.4514	-53.8687	3.2579	0.0688909	0.00661473	9.22747	-53.0781	7.35e-08	0.761116	0.150958	3
2020_07_24_exp2_TH	3	interneuron	2	negative	unknown	standard	Pvalb	ChrimsonR_kv_eyfp_AAV	2020_07_24_exp2_TH	212	687	59	1.82831e+08	10.1926	0.116377	230	12.55	62.2875	0.733648	-49.7375	1.62639	0.202544	0.0134542	32.7435	-68.2889	5.57e-08	2.41993	-0.679306	1
2020_07_24_exp3_TH	0	interneuron	2	positive	Pvalb	standard	Pvalb	ChrimsonR_kv_eyfp_AAV	2020_07_24_exp3_TH	260	628	62	1.04784e+08	7.81487	0.062938	150	27.6	84.925	0.486868	-57.325	1.54124	0.603991	0.0222087	23.6622	-76.5563	7.46e-08	5.4198	-1.23692	1
2020_07_24_exp3_TH	1	interneuron	2	positive	Pvalb	standard	Pvalb	ChrimsonR_kv_eyfp_AAV	2020_07_24_exp3_TH	171	716	61	9.69101e+07	6.50873	0.0483768	210	13.5125	61.1125	0.601854	-47.6	1.80887	1.15068	0.0129662	43.4976	-73.9849	6.72e-08	3.43867	-1.69121	1
2020_07_26_exp3_TH	0	interneuron	2	negative	unknown	standard	Pvalb	ChrimsonR_kv_eyfp_AAV	2020_07_26_exp3_TH	296	629	51	2.57135e+08	15.5817	0.0942011	30	26.9312	79.7125	1.13832	-52.7812	3.05464	0.175101	0.0277441	15.5666	-70.3328	6.06e-08	0.00898807	0.906951	3
2020_07_26_exp3_TH	2	interneuron	2	positive	Pvalb	standard	Pvalb	ChrimsonR_kv_eyfp_AAV	2020_07_26_exp3_TH	160	780	54	8.5373e+07	5.83682	0.164199	310	18.8438	70.3687	0.44822	-51.525	1.61606	0.476542	0.00443143	25.1255	-68.6972	6.84e-08	3.91589	-0.903815	1
2020_08_02_exp2_TH	0	interneuron	2	positive	Sst	standard	Sst	ChrimsonR_kv_eyfp_AAV	2020_08_02_exp2_TH	149	781	86	1.74784e+08	19.9216	0.321717	150	37.5	91.9437	0.707987	-54.4437	2.01858	0.311709	0.048646	15.5246	-65.0023	1.14e-07	-1.52355	-1.20456	2
2020_08_02_exp3_TH	1	interneuron	5	positive	Sst	standard	Sst	ChrimsonR_kv_eyfp_AAV	2020_08_02_exp3_TH	525	372	42	2.49082e+08	22.211	0.222623	70	21.9812	76.35	1.00373	-54.3687	1.74304	0.330644	0.148942	12.5057	-55.4588	8.92e-08	-0.780058	-1.31133	2
2020_08_13_exp1_TH	0	interneuron	4	positive	Sst	standard	Sst	ChrimsonR_kv_eyfp_AAV	2020_08_13_exp1_TH	373	628	47	154060443	9.99405	0.0355178	150	5.15	60.8188	0.663271	-55.6688	1.74189	0.504875	0.0158735	16.3561	-62.7886	6.49e-08	2.6077	-0.819164	2
2020_08_13_exp1_TH	3	interneuron	2	positive	Sst	standard	Sst	ChrimsonR_kv_eyfp_AAV	2020_08_13_exp1_TH	312	685	61	1.90618e+08	21.963	0.254008	130	32.6437	84.8062	0.765745	-52.1625	1.91266	0.273994	0.110293	7.38656	-60.9271	1.15e-07	-1.17692	-0.959033	2
2020_08_13_exp2_TH	2	interneuron	2	negative	unknown	standard	Sst	ChrimsonR_kv_eyfp_AAV	2020_08_13_exp2_TH	170	736	42	1.41493e+08	6.76264	0.0302257	210	14.1937	62.0437	1.73089	-47.85	2.86498	0.413765	0.00821915	20.7739	-73.0405	4.78e-08	0.778474	0.548045	3
2020_08_20_exp2_TH	3	interneuron	5	positive	Sst	standard	Sst	ChrimsonR_kv_eyfp_AAV	2020_08_20_exp2_TH	457	535	23	3.06243e+08	19.9168	0.0285629	50	31.7937	87.3312	0.650382	-55.5375	2.43688	0.433168	0.0160887	25.4072	-65.938	6.5e-08	-0.111981	0.372807	2
2020_08_21_exp1_TH	3	interneuron	2	negative	unknown	standard	Penk	ChrimsonR_kv_eyfp_AAV	2020_08_21_exp1_TH	133	851	66	1.03306e+08	5.81064	0.0708849	170	27.0938	85.3062	0.478822	-58.2125	1.58931	0.589637	0.00588035	30.6157	-72.1244	5.62e-08	5.31888	-1.29868	1
2020_09_03_exp1_TH	3	interneuron	2	positive	Pvalb	standard	Pvalb	ChrimsonR_kv_eyfp_AAV	2020_09_03_exp1_TH	256	635	53	1.094e+08	7.95222	0.028179	270	12.6687	63.8375	0.749143	-51.1688	1.21538	0.673621	-0.013011	32.2557	-67.3696	7.27e-08	3.41149	-1.18567	1
2020_09_03_exp2_TH	1	interneuron	2	positive	Pvalb	standard	Pvalb	ChrimsonR_kv_eyfp_AAV	2020_09_03_exp2_TH	69	816	61	7.68256e+07	4.02283	0.0270458	150	25.2062	79.0062	0.630129	-53.8	1.72084	0.610516	0.00212684	20.9865	-66.0795	5.24e-08	5.30161	-1.51749	1
2020_09_03_exp2_TH	2	interneuron	2	positive	Pvalb	standard	Pvalb	ChrimsonR_kv_eyfp_AAV	2020_09_03_exp2_TH	86	802	43	1.1567e+08	8.04629	0.0583542	170	32.0687	84.4125	0.717473	-52.3438	1.48703	0.659911	0.0167233	23.1484	-63.6435	6.96e-08	5.21936	-1.58173	1
2020_09_03_exp2_TH	3	interneuron	2	positive	Pvalb	standard	Pvalb	ChrimsonR_kv_eyfp_AAV	2020_09_03_exp2_TH	70	818	63	1.17785e+08	7.22965	0.0489075	170	22.4625	69.3437	0.8912	-46.8812	1.81144	0.737673	0.00484851	38.0697	-66.0115	6.14e-08	3.12877	-1.51398	1
2020_09_04_exp2_TH	0	interneuron	2	negative	unknown	standard	Sst	ChrimsonR_kv_eyfp_AAV	2020_09_04_exp2_TH	206	708	88	73201621	5.23445	0.0669677	190	20.1687	79.55	0.495659	-59.3812	1.48962	0.505088	-1.33e-05	26.198	-76.4929	7.15e-08	5.15428	-0.994386	1
2020_09_25_exp1_TH	3	interneuron	2	positive	GAD2	standard	GAD2	ChrimsonR_kv_eyfp_AAV	2020_09_25_exp1_TH	185	859		2.05935e+08	25.2476	0.0583068	130	40.2875	92.8	1.0047	-52.5125	2.04414	0.10832	0.172947	5.07294	-62.31	1.23e-07	-0.94085	-0.326887	2
2020_10_16_exp1_TH	0	interneuron	5	positive	Pvalb	standard	Pvalb	ChrimsonR_kv_eyfp_AAV	2020_10_16_exp1_TH	449	477	55	1.09867e+08	8.52185	0.0427447	250	12.2625	62.3625	0.596714	-50.1	1.64666	0.49651	-0.00984043	32.6996	-75.0048	7.76e-08	3.15437	-1.067	1
2020_10_16_exp1_TH	2	interneuron	5	negative	unknown	standard	Pvalb	ChrimsonR_kv_eyfp_AAV	2020_10_16_exp1_TH	443	491	64	1.40275e+08	18.4216	0.0558845	110	15.4688	74.475	0.654886	-59.0062	1.79353	0.36394	0.016853	17.2312	-69.9327	1.31e-07	0.0499713	-0.182334	2
2020_10_22_exp1_TH	1	interneuron	2	negative	unknown	standard	Sst	ChrimsonR_kv_eyfp_AAV	2020_10_22_exp1_TH	159	788	74	5.06391e+07	6.4396	0.0222334	310	20.6625	77.2625	0.440195	-56.6	1.74721	0.41517	0.0130971	22.3841	-76.709	1.27e-07	4.80159	-0.733146	1
2020_10_22_exp1_TH	3	interneuron	2	positive	Sst	standard	Sst	ChrimsonR_kv_eyfp_AAV	2020_10_22_exp1_TH	246	703	81	1.38607e+08	13.0054	0.100595	210	15.9312	68.1812	0.764739	-52.25	1.66311	0.346935	0.0145248	18.2879	-52.2781	9.38e-08	0.562243	-0.676953	2
2020_10_23_exp2_TH	1	interneuron	2	negative	unknown	standard	Tlx3	ChrimsonR_kv_eyfp_AAV	2020_10_23_exp2_TH	219	738	95	7.87872e+07	4.9743	0.0220048	270	23.6437	81.275	0.46474	-57.6312	1.60762	0.630711	0.0178649	21.6789	-74.1386	6.31e-08	5.24701	-1.09094	1
2020_10_30_exp1_TH	3	interneuron	4	positive	Sst	standard	Sst	ChrimsonR_kv_eyfp_AAV	2020_10_30_exp1_TH	468	502	64	1.45102e+08	17.7333	0.0493843	130	27.9375	82.4625	0.762595	-54.525	2.01326	0.295726	0.186746	9.13119	-69.8039	1.22e-07	-0.533421	-0.121766	2
2020_10_30_exp2_TH	3	interneuron	5	positive	Sst	standard	Sst	ChrimsonR_kv_eyfp_AAV	2020_10_30_exp2_TH	497	357	79	2.75544e+08	39.0001	0.109844	50	30.475	83.5	0.823736	-53.025	1.67125	0.253892	0.107984	27.2115	-49.7422	1.42e-07	-0.485027	-1.09143	2
2020_11_05_exp4_TH	0	interneuron	2	positive	Sst	standard	Sst	ChrimsonR_kv_eyfp_AAV	2020_11_05_exp4_TH	262	683	45	2.38978e+08	14.5307	0.12117	70	24.5938	77.7938	0.894116	-53.2	1.87418	0.36748	0.000149033	28.8121	-70.4396	6.08e-08	0.0347698	0.32907	2
2020_11_06_exp3_TH	0	interneuron	4	positive	Sst	standard	Sst	ChrimsonR_kv_eyfp_AAV	2020_11_06_exp3_TH	475	515	92	4.22611e+08	38.6365	0.098399	30	20.2625	74.8687	1.53146	-54.6063	1.39423	0.183483	0.117646	14.2815	-59.4405	9.14e-08	-0.245023	-1.17859	2
2020_11_12_exp1_TH	0	interneuron	2	negative	unknown	standard	Penk	ChrimsonR_kv_eyfp_AAV	2020_11_12_exp1_TH	149	866	58	2.14371e+08	12.0379	0.075993	50	38.225	88.2937	0.963555	-50.0687	4.40828	0.160099	0.0806408	13.4507	-67.7715	5.62e-08	-0.15616	1.20208	3
2020_11_12_exp2_TH	3	interneuron	2	negative	unknown	standard	Penk	ChrimsonR_kv_eyfp_AAV	2020_11_12_exp2_TH	194	780	109	2.28077e+08	11.6033	0.134533	50	41.7188	93.9437	0.856036	-52.225	2.99191	0.367977	0.0805087	45.4353	-69.1507	5.09e-08	-0.233353	0.711238	3
2020_11_13_exp2_TH	1	interneuron	4	negative	unknown	standard	Sst	ChrimsonR_kv_eyfp_AAV	2020_11_13_exp2_TH	347	677	77	9.069e+07	5.07975	0.0249729	270	13.3	69.4875	0.565097	-56.1875	1.62227	0.586235	0.000698547	43.9327	-55.8908	5.6e-08	3.89631	-1.58211	1
2020_11_13_exp3_TH	1	interneuron	4	negative	unknown	standard	Sst	ChrimsonR_kv_eyfp_AAV	2020_11_13_exp3_TH	470	548	104	9.07325e+07	5.21837	0.0195404	250	19.6125	75.6562	0.530636	-56.0438	2.03908	0.678681	0.00338172	42.4554	-70.2245	5.75e-08	4.12327	-1.85667	1
2020_11_19_exp3_TH	2	interneuron	4	negative	unknown	standard	Pvalb	ChrimsonR_kv_eyfp_AAV	2020_11_19_exp3_TH	435	609	84	2.75649e+08	19.2456	0.228556	70	29.3687	89.0375	0.712453	-59.6688	2.0391	0.35035	0.0337572	18.7014	-59.1495	6.98e-08	-1.16888	-1.55867	2
2020_11_20_exp1_TH	3	interneuron	2	positive	Pvalb	standard	Pvalb	ChrimsonR_kv_eyfp_AAV	2020_11_20_exp1_TH	285	666	73	6.33895e+07	6.16137	0.0793822	350	23.7687	79.75	0.747017	-55.9813	1.42558	1.00061	0.0188846	13.4431	-62.5672	9.72e-08	4.49829	-1.0691	1
2017_11_27_exp1_TH	0	interneuron	5	negative	unknown	standard	Tlx3	Ai136	2017_11_27_exp1_TH				1.63275e+08	8.48288	0.0388537	190	17.5312	69.0938	0.7325	-51.5625	1.85816	0.811445	0.00242174	45.6893	-67.4601	5.2e-08	3.38421	-1.85128	1
2018_03_21_exp1_AB	1	interneuron	5	negative	unknown	standard	Tlx3	Ai136	2018_03_21_exp1_AB				7.03391e+07	4.1699	0.0884527	340	20.6562	71.4375	0.384551	-50.7812	1.39781	0.654192	0.00190525	67.1043	-76.5219	5.93e-08	3.83337	-2.09268	1
2018_10_16_exp1_TH	1	interneuron	2	positive	Sst	standard	Sst	ChrimsonR-Kv-TFP	2018_10_16_exp1_TH				3.75343e+08	28.4783	0.246665	30	29.375	84.1562	0.902425	-54.7812	2.3719	0.0551474	0.00575616	20.1341	-62.3497	7.59e-08	-0.92519	-1.51611	2

## Sheet: notes
Each row in the previous tab represents one postsynaptic/patched cell. K-means clustering was performed using intrinsic features in rows M-AA.
Resulting clusters are numbered as in the corresponding Figure.
