# Supplementary material for: Synaptic connectivity to L2/3 of primary visual cortex measured by two-photon optogenetic stimulation
Source: eLife. 2022 Jan 21;11:e71103. doi: 10.7554/eLife.71103 (PMC8824465; doi:10.7554/eLife.71103)
Supplement: Figure 3—source data 1. [file elife-71103-fig3-data1.xlsx]

## Sheet: Fig3B_PenkToL23PC
exp_id	headstage	post_class	post_layer	postPia	post_z	MP_ID	prePia	x_ap	pre_z	cnx
2020_11_12_exp2_TH	1	pyramidal	2	129	252.114	Point 11	143.312	90.485	251.254	no cnx
2020_11_12_exp2_TH	1	pyramidal	2	129	252.114	Point 10	141.01	78.0073	251.254	no cnx
2020_11_12_exp2_TH	1	pyramidal	2	129	252.114	Point 13	109.728	131.992	240.424	no cnx
2020_11_12_exp2_TH	1	pyramidal	2	129	252.114	Point 12	133.015	136.474	240.424	no cnx
2020_11_12_exp2_TH	1	pyramidal	2	129	252.114	Point 15	94.206	181.442	248.474	no cnx
2020_11_12_exp2_TH	1	pyramidal	2	129	252.114	Point 14	140.516	91.6491	237.864	no cnx
2020_11_12_exp2_TH	1	pyramidal	2	129	252.114	Point 17	165.163	238.431	248.474	no cnx
2020_11_12_exp2_TH	1	pyramidal	2	129	252.114	Point 16	82.954	222.321	248.474	no cnx
2020_11_12_exp2_TH	1	pyramidal	2	129	252.114	Point 19	218.489	162.097	266.494	no cnx
2020_11_12_exp2_TH	1	pyramidal	2	129	252.114	Point 18	133.366	255.898	248.474	no cnx
2020_11_12_exp2_TH	1	pyramidal	2	129	252.114	Point 31	151.76	111.788	308.944	no cnx
2020_11_12_exp2_TH	1	pyramidal	2	129	252.114	Point 30	195.439	148.169	292.384	no cnx
2020_11_12_exp2_TH	1	pyramidal	2	129	252.114	Point 37	174.746	-137.139	253.714	no cnx
2020_11_12_exp2_TH	1	pyramidal	2	129	252.114	Point 36	166.649	-104.334	253.714	no cnx
2020_11_12_exp2_TH	1	pyramidal	2	129	252.114	Point 35	154.925	-140.941	253.714	no cnx
2020_11_12_exp2_TH	1	pyramidal	2	129	252.114	Point 34	205.88	-147.643	253.714	no cnx
2020_11_12_exp2_TH	1	pyramidal	2	129	252.114	Point 5	206.953	19.4265	255.574	no cnx
2020_11_12_exp2_TH	1	pyramidal	2	129	252.114	Point 4	118.963	126.853	255.574	no cnx
2020_11_12_exp2_TH	1	pyramidal	2	129	252.114	Point 7	233.133	85.7037	255.574	no cnx
2020_11_12_exp2_TH	1	pyramidal	2	129	252.114	Point 6	226.906	67.2659	255.574	no cnx
2020_11_12_exp2_TH	1	pyramidal	2	129	252.114	Point 1	152.299	55.533	263.364	no cnx
2020_11_12_exp2_TH	1	pyramidal	2	129	252.114	Point 3	154.722	-67.7957	255.574	no cnx
2020_11_12_exp2_TH	1	pyramidal	2	129	252.114	Point 2	114.662	-62.4276	263.364	no cnx
2020_11_12_exp2_TH	1	pyramidal	2	129	252.114	Point 9	168.091	-62.3688	251.254	no cnx
2020_11_12_exp2_TH	1	pyramidal	2	129	252.114	Point 8	96.6223	-4.27031	251.254	no cnx
2020_11_12_exp2_TH	1	pyramidal	2	129	252.114	Point 32	244.738	168.251	308.944	no cnx
2020_11_12_exp2_TH	1	pyramidal	2	129	252.114	Point 28	182.92	124.424	292.384	no cnx
2020_11_12_exp2_TH	1	pyramidal	2	129	252.114	Point 29	219.784	121.661	292.384	no cnx
2020_11_12_exp2_TH	1	pyramidal	2	129	252.114	Point 20	229.874	225.308	266.494	no cnx
2020_11_12_exp2_TH	1	pyramidal	2	129	252.114	Point 21	147.659	354.094	266.494	no cnx
2020_11_12_exp2_TH	1	pyramidal	2	129	252.114	Point 22	173.08	204.665	273.794	no cnx
2020_11_12_exp2_TH	1	pyramidal	2	129	252.114	Point 23	98.8119	268.658	273.794	no cnx
2020_11_12_exp2_TH	1	pyramidal	2	129	252.114	Point 24	197.38	324.742	273.794	no cnx
2020_11_12_exp2_TH	1	pyramidal	2	129	252.114	Point 25	162.011	111.56	281.114	no cnx
2020_11_12_exp2_TH	1	pyramidal	2	129	252.114	Point 26	135.398	92.4947	281.114	no cnx
2020_11_12_exp2_TH	1	pyramidal	2	129	252.114	Point 27	207.958	209.511	281.114	no cnx
2020_11_12_exp2_TH	1	pyramidal	2	129	252.114	Point 39	114.388	-74.2476	236.944	no cnx
2020_11_12_exp2_TH	1	pyramidal	2	129	252.114	Point 33	245.474	83.8196	308.944	no cnx
2020_11_12_exp2_TH	1	pyramidal	2	129	252.114	Point 38	162.286	-152.001	236.944	no cnx
2020_11_12_exp1_TH	3	pyramidal	2	139	386.944	Point 11	196.71	118.141	359.974	no cnx
2020_11_12_exp1_TH	3	pyramidal	2	139	386.944	Point 10	158.485	8.55304	359.974	direct
2020_11_12_exp1_TH	3	pyramidal	2	139	386.944	Point 13	197.309	23.9609	359.974	excitatory
2020_11_12_exp1_TH	3	pyramidal	2	139	386.944	Point 12	114.34	18.9159	359.974	no cnx
2020_11_12_exp1_TH	3	pyramidal	2	139	386.944	Point 15	89.2917	-190.672	353.464	no cnx
2020_11_12_exp1_TH	3	pyramidal	2	139	386.944	Point 14	78.0854	22.2283	359.974	no cnx
2020_11_12_exp1_TH	3	pyramidal	2	139	386.944	Point 17	168.844	-79.3238	353.464	no cnx
2020_11_12_exp1_TH	3	pyramidal	2	139	386.944	Point 16	145.956	-48.5272	353.464	no cnx
2020_11_12_exp1_TH	3	pyramidal	2	139	386.944	Point 19	176.905	-43.3159	346.184	no cnx
2020_11_12_exp1_TH	3	pyramidal	2	139	386.944	Point 18	108.16	-150.712	353.464	no cnx
2020_11_12_exp1_TH	3	pyramidal	2	139	386.944	Point 5	65.3717	-214.013	362.084	no cnx
2020_11_12_exp1_TH	3	pyramidal	2	139	386.944	Point 4	162.085	-111.677	373.034	no cnx
2020_11_12_exp1_TH	3	pyramidal	2	139	386.944	Point 7	159.785	-69.2398	362.084	no cnx
2020_11_12_exp1_TH	3	pyramidal	2	139	386.944	Point 6	77.6618	-154.123	362.084	no cnx
2020_11_12_exp1_TH	3	pyramidal	2	139	386.944	Point 1	52.509	-212.105	373.034	no cnx
2020_11_12_exp1_TH	3	pyramidal	2	139	386.944	Point 3	237.207	-170.956	373.034	no cnx
2020_11_12_exp1_TH	3	pyramidal	2	139	386.944	Point 2	163.921	-198.692	373.034	no cnx
2020_11_12_exp1_TH	3	pyramidal	2	139	386.944	Point 9	60.5774	-67.2028	362.084	no cnx
2020_11_12_exp1_TH	3	pyramidal	2	139	386.944	Point 8	41.8649	-141.552	362.084	no cnx
2020_11_12_exp1_TH	3	pyramidal	2	139	386.944	Point 28	86.5464	-252.822	326.264	no cnx
2020_11_12_exp1_TH	3	pyramidal	2	139	386.944	Point 20	158.383	85.7727	346.184	no cnx
2020_11_12_exp1_TH	3	pyramidal	2	139	386.944	Point 21	121.053	116.454	346.184	no cnx
2020_11_12_exp1_TH	3	pyramidal	2	139	386.944	Point 22	126.814	164.224	346.184	no cnx
2020_11_12_exp1_TH	3	pyramidal	2	139	386.944	Point 23	175.257	99.549	333.554	no cnx
2020_11_12_exp1_TH	3	pyramidal	2	139	386.944	Point 24	144.944	43.2559	333.554	no cnx
2020_11_12_exp1_TH	3	pyramidal	2	139	386.944	Point 25	147.79	-25.2973	333.554	no cnx
2020_11_12_exp1_TH	3	pyramidal	2	139	386.944	Point 26	142.811	-41.8227	333.554	no cnx
2020_11_12_exp1_TH	3	pyramidal	2	139	386.944	Point 27	88.3588	-273.396	326.264	no cnx
2020_08_21_exp2_TH	1	pyramidal	2	178	34.5241	Point 11	146.337	-123.275	-8.156	no cnx
2020_08_21_exp2_TH	1	pyramidal	2	178	34.5241	Point 10	153.602	-81.381	1.384	no cnx
2020_08_21_exp2_TH	1	pyramidal	2	178	34.5241	Point 13	206.679	-214.197	-8.156	no cnx
2020_08_21_exp2_TH	1	pyramidal	2	178	34.5241	Point 12	110.641	-175.075	-8.156	no cnx
2020_08_21_exp2_TH	1	pyramidal	2	178	34.5241	Point 15	144.594	-289.267	5.494	no cnx
2020_08_21_exp2_TH	1	pyramidal	2	178	34.5241	Point 14	83.3173	-251.327	-8.156	no cnx
2020_08_21_exp2_TH	1	pyramidal	2	178	34.5241	Point 17	267.77	-317.67	5.494	no cnx
2020_08_21_exp2_TH	1	pyramidal	2	178	34.5241	Point 16	120.661	-286.582	5.494	no cnx
2020_08_21_exp2_TH	1	pyramidal	2	178	34.5241	Point 19	277.267	-199.032	21.004	no cnx
2020_08_21_exp2_TH	1	pyramidal	2	178	34.5241	Point 18	120.731	-307.104	5.494	no cnx
2020_08_21_exp2_TH	1	pyramidal	2	178	34.5241	Point 31	185.734	-112.904	23.124	no cnx
2020_08_21_exp2_TH	1	pyramidal	2	178	34.5241	Point 30	234.969	-114.004	23.124	no cnx
2020_08_21_exp2_TH	1	pyramidal	2	178	34.5241	Point 5	95.6578	-173.289	11.204	no cnx
2020_08_21_exp2_TH	1	pyramidal	2	178	34.5241	Point 4	170.511	-164.04	11.204	no cnx
2020_08_21_exp2_TH	1	pyramidal	2	178	34.5241	Point 7	173.317	-113.775	1.384	no cnx
2020_08_21_exp2_TH	1	pyramidal	2	178	34.5241	Point 6	141.328	-107.053	1.384	no cnx
2020_08_21_exp2_TH	1	pyramidal	2	178	34.5241	Point 1	163.737	-85.1493	11.204	no cnx
2020_08_21_exp2_TH	1	pyramidal	2	178	34.5241	Point 3	74.0178	-116.349	11.204	no cnx
2020_08_21_exp2_TH	1	pyramidal	2	178	34.5241	Point 2	277.824	-141.171	11.204	no cnx
2020_08_21_exp2_TH	1	pyramidal	2	178	34.5241	Point 9	112.65	-191.98	1.384	no cnx
2020_08_21_exp2_TH	1	pyramidal	2	178	34.5241	Point 8	97.8548	-113.687	1.384	no cnx
2020_08_21_exp2_TH	1	pyramidal	2	178	34.5241	Point 32	196.949	-130.42	23.124	no cnx
2020_08_21_exp2_TH	1	pyramidal	2	178	34.5241	Point 28	108.343	-238.286	-20.896	no cnx
2020_08_21_exp2_TH	1	pyramidal	2	178	34.5241	Point 29	89.0544	-287.439	-20.896	no cnx
2020_08_21_exp2_TH	1	pyramidal	2	178	34.5241	Point 20	320.612	-179.837	21.004	no cnx
2020_08_21_exp2_TH	1	pyramidal	2	178	34.5241	Point 21	257.394	-286.619	21.004	no cnx
2020_08_21_exp2_TH	1	pyramidal	2	178	34.5241	Point 22	170.068	-240.637	21.004	no cnx
2020_08_21_exp2_TH	1	pyramidal	2	178	34.5241	Point 23	230.482	-357.781	21.004	no cnx
2020_08_21_exp2_TH	1	pyramidal	2	178	34.5241	Point 24	94.4366	-251.42	-20.896	no cnx
2020_08_21_exp2_TH	1	pyramidal	2	178	34.5241	Point 25	201.56	-103.473	-20.896	no cnx
2020_08_21_exp2_TH	1	pyramidal	2	178	34.5241	Point 26	139.922	-184.277	-20.896	no cnx
2020_08_21_exp2_TH	1	pyramidal	2	178	34.5241	Point 27	258.6	-245.727	-20.896	no cnx
2020_08_21_exp2_TH	1	pyramidal	2	178	34.5241	Point 33	182.276	-189.156	23.124	no cnx
2020_08_21_exp2_TH	0	pyramidal	2	153	24.2539	Point 11	141.322	-175.107	-8.156	no cnx
2020_08_21_exp2_TH	0	pyramidal	2	153	24.2539	Point 10	148.587	-133.213	1.384	no cnx
2020_08_21_exp2_TH	0	pyramidal	2	153	24.2539	Point 13	201.664	-266.029	-8.156	no cnx
2020_08_21_exp2_TH	0	pyramidal	2	153	24.2539	Point 12	105.626	-226.907	-8.156	no cnx
2020_08_21_exp2_TH	0	pyramidal	2	153	24.2539	Point 15	139.579	-341.099	5.494	no cnx
2020_08_21_exp2_TH	0	pyramidal	2	153	24.2539	Point 14	78.3023	-303.159	-8.156	no cnx
2020_08_21_exp2_TH	0	pyramidal	2	153	24.2539	Point 17	262.755	-369.502	5.494	no cnx
2020_08_21_exp2_TH	0	pyramidal	2	153	24.2539	Point 16	115.646	-338.414	5.494	no cnx
2020_08_21_exp2_TH	0	pyramidal	2	153	24.2539	Point 19	272.252	-250.864	21.004	no cnx
2020_08_21_exp2_TH	0	pyramidal	2	153	24.2539	Point 18	115.716	-358.936	5.494	no cnx
2020_08_21_exp2_TH	0	pyramidal	2	153	24.2539	Point 31	180.719	-164.736	23.124	no cnx
2020_08_21_exp2_TH	0	pyramidal	2	153	24.2539	Point 30	229.954	-165.836	23.124	no cnx
2020_08_21_exp2_TH	0	pyramidal	2	153	24.2539	Point 5	90.6428	-225.121	11.204	no cnx
2020_08_21_exp2_TH	0	pyramidal	2	153	24.2539	Point 4	165.496	-215.872	11.204	no cnx
2020_08_21_exp2_TH	0	pyramidal	2	153	24.2539	Point 7	168.302	-165.607	1.384	no cnx
2020_08_21_exp2_TH	0	pyramidal	2	153	24.2539	Point 6	136.313	-158.885	1.384	no cnx
2020_08_21_exp2_TH	0	pyramidal	2	153	24.2539	Point 1	158.722	-136.981	11.204	no cnx
2020_08_21_exp2_TH	0	pyramidal	2	153	24.2539	Point 3	69.0028	-168.181	11.204	no cnx
2020_08_21_exp2_TH	0	pyramidal	2	153	24.2539	Point 2	272.809	-193.003	11.204	no cnx
2020_08_21_exp2_TH	0	pyramidal	2	153	24.2539	Point 9	107.635	-243.812	1.384	no cnx
2020_08_21_exp2_TH	0	pyramidal	2	153	24.2539	Point 8	92.8398	-165.519	1.384	no cnx
2020_08_21_exp2_TH	0	pyramidal	2	153	24.2539	Point 32	191.934	-182.251	23.124	no cnx
2020_08_21_exp2_TH	0	pyramidal	2	153	24.2539	Point 28	103.328	-290.118	-20.896	no cnx
2020_08_21_exp2_TH	0	pyramidal	2	153	24.2539	Point 29	84.0394	-339.271	-20.896	no cnx
2020_08_21_exp2_TH	0	pyramidal	2	153	24.2539	Point 20	315.597	-231.668	21.004	no cnx
2020_08_21_exp2_TH	0	pyramidal	2	153	24.2539	Point 21	252.379	-338.451	21.004	no cnx
2020_08_21_exp2_TH	0	pyramidal	2	153	24.2539	Point 22	165.053	-292.469	21.004	no cnx
2020_08_21_exp2_TH	0	pyramidal	2	153	24.2539	Point 23	225.467	-409.612	21.004	no cnx
2020_08_21_exp2_TH	0	pyramidal	2	153	24.2539	Point 24	89.4216	-303.251	-20.896	no cnx
2020_08_21_exp2_TH	0	pyramidal	2	153	24.2539	Point 25	196.545	-155.305	-20.896	no cnx
2020_08_21_exp2_TH	0	pyramidal	2	153	24.2539	Point 26	134.907	-236.108	-20.896	no cnx
2020_08_21_exp2_TH	0	pyramidal	2	153	24.2539	Point 27	253.585	-297.559	-20.896	no cnx
2020_08_21_exp2_TH	0	pyramidal	2	153	24.2539	Point 33	177.261	-240.988	23.124	no cnx
2020_08_21_exp1_TH	2	pyramidal	2	97	62.664	Point 11	233.518	65.8702	54.564	no cnx
2020_08_21_exp1_TH	2	pyramidal	2	97	62.664	Point 10	193.571	98.1983	59.584	no cnx
2020_08_21_exp1_TH	2	pyramidal	2	97	62.664	Point 13	201.091	129.367	45.364	no cnx
2020_08_21_exp1_TH	2	pyramidal	2	97	62.664	Point 12	321.103	-11.4605	54.564	no cnx
2020_08_21_exp1_TH	2	pyramidal	2	97	62.664	Point 15	97.9506	67.7436	45.364	excitatory
2020_08_21_exp1_TH	2	pyramidal	2	97	62.664	Point 14	130.286	80.9147	45.364	no cnx
2020_08_21_exp1_TH	2	pyramidal	2	97	62.664	Point 17	247.497	17.3671	45.364	no cnx
2020_08_21_exp1_TH	2	pyramidal	2	97	62.664	Point 16	178.737	-86.6088	43.054	no cnx
2020_08_21_exp1_TH	2	pyramidal	2	97	62.664	Point 19	227.069	-112.913	43.054	no cnx
2020_08_21_exp1_TH	2	pyramidal	2	97	62.664	Point 18	165.823	-115.061	43.054	no cnx
2020_08_21_exp1_TH	2	pyramidal	2	97	62.664	Point 31	143.415	126.56	23.344	no cnx
2020_08_21_exp1_TH	2	pyramidal	2	97	62.664	Point 30	276.06	37.1482	23.344	no cnx
2020_08_21_exp1_TH	2	pyramidal	2	97	62.664	Point 37	86.3498	-11.2116	15.704	no cnx
2020_08_21_exp1_TH	2	pyramidal	2	97	62.664	Point 36	173.734	123.188	15.704	no cnx
2020_08_21_exp1_TH	2	pyramidal	2	97	62.664	Point 35	155.048	155.828	15.704	no cnx
2020_08_21_exp1_TH	2	pyramidal	2	97	62.664	Point 34	168.808	148.249	23.344	no cnx
2020_08_21_exp1_TH	2	pyramidal	2	97	62.664	Point 5	243.452	81.9964	68.664	no cnx
2020_08_21_exp1_TH	2	pyramidal	2	97	62.664	Point 4	106.564	57.7907	68.664	no cnx
2020_08_21_exp1_TH	2	pyramidal	2	97	62.664	Point 7	120.831	-6.81957	59.584	direct
2020_08_21_exp1_TH	2	pyramidal	2	97	62.664	Point 6	153.238	49.1036	68.664	no cnx
2020_08_21_exp1_TH	2	pyramidal	2	97	62.664	Point 1	150.098	-125.373	76.574	no cnx
2020_08_21_exp1_TH	2	pyramidal	2	97	62.664	Point 3	78.9443	56.4635	76.574	no cnx
2020_08_21_exp1_TH	2	pyramidal	2	97	62.664	Point 2	306.744	-131.563	76.574	no cnx
2020_08_21_exp1_TH	2	pyramidal	2	97	62.664	Point 9	149.758	81.9932	59.584	no cnx
2020_08_21_exp1_TH	2	pyramidal	2	97	62.664	Point 8	167.86	51.916	59.584	no cnx
2020_08_21_exp1_TH	2	pyramidal	2	97	62.664	Point 32	102.413	121.585	23.344	no cnx
2020_08_21_exp1_TH	2	pyramidal	2	97	62.664	Point 48	93.7229	-2.66097	47.894	no cnx
2020_08_21_exp1_TH	2	pyramidal	2	97	62.664	Point 49	249.807	108.787	47.894	no cnx
2020_08_21_exp1_TH	2	pyramidal	2	97	62.664	Point 42	203.544	22.6864	7.464	no cnx
2020_08_21_exp1_TH	2	pyramidal	2	97	62.664	Point 43	91.7952	-13.8706	7.464	no cnx
2020_08_21_exp1_TH	2	pyramidal	2	97	62.664	Point 40	145.084	114.892	7.464	no cnx
2020_08_21_exp1_TH	2	pyramidal	2	97	62.664	Point 41	84.6401	48.8881	7.464	no cnx
2020_08_21_exp1_TH	2	pyramidal	2	97	62.664	Point 46	177.822	39.6661	47.894	no cnx
2020_08_21_exp1_TH	2	pyramidal	2	97	62.664	Point 47	151.679	58.9827	47.894	no cnx
2020_08_21_exp1_TH	2	pyramidal	2	97	62.664	Point 44	109.441	0.379217	7.464	no cnx
2020_08_21_exp1_TH	2	pyramidal	2	97	62.664	Point 45	136.983	98.6641	47.894	no cnx
2020_08_21_exp1_TH	2	pyramidal	2	97	62.664	Point 28	115.364	47.3076	23.344	no cnx
2020_08_21_exp1_TH	2	pyramidal	2	97	62.664	Point 29	171.523	73.8458	23.344	no cnx
2020_08_21_exp1_TH	2	pyramidal	2	97	62.664	Point 20	228.474	-121.443	43.054	no cnx
2020_08_21_exp1_TH	2	pyramidal	2	97	62.664	Point 21	123.838	-72.1759	35.484	no cnx
2020_08_21_exp1_TH	2	pyramidal	2	97	62.664	Point 22	149.692	-54.4254	35.484	no cnx
2020_08_21_exp1_TH	2	pyramidal	2	97	62.664	Point 23	199.456	-45.8021	35.484	no cnx
2020_08_21_exp1_TH	2	pyramidal	2	97	62.664	Point 24	256.029	-54.137	35.484	no cnx
2020_08_21_exp1_TH	2	pyramidal	2	97	62.664	Point 25	170.767	-55.4643	35.484	no cnx
2020_08_21_exp1_TH	2	pyramidal	2	97	62.664	Point 26	124.894	-54.7442	35.484	no cnx
2020_08_21_exp1_TH	2	pyramidal	2	97	62.664	Point 27	189.865	-84.2087	23.344	no cnx
2020_08_21_exp1_TH	2	pyramidal	2	97	62.664	Point 39	209.727	178.99	15.704	no cnx
2020_08_21_exp1_TH	2	pyramidal	2	97	62.664	Point 33	283.662	111.247	23.344	no cnx
2020_08_21_exp1_TH	2	pyramidal	2	97	62.664	Point 38	111.413	64.0612	15.704	no cnx
2020_08_21_exp1_TH	1	pyramidal	2	95	56.3338	Point 11	233.842	-24.8459	54.564	no cnx
2020_08_21_exp1_TH	1	pyramidal	2	95	56.3338	Point 10	193.895	7.48215	59.584	no cnx
2020_08_21_exp1_TH	1	pyramidal	2	95	56.3338	Point 13	201.415	38.6507	45.364	no cnx
2020_08_21_exp1_TH	1	pyramidal	2	95	56.3338	Point 12	321.427	-102.177	54.564	no cnx
2020_08_21_exp1_TH	1	pyramidal	2	95	56.3338	Point 15	98.2747	-22.9725	45.364	no cnx
2020_08_21_exp1_TH	1	pyramidal	2	95	56.3338	Point 14	130.61	-9.80137	45.364	no cnx
2020_08_21_exp1_TH	1	pyramidal	2	95	56.3338	Point 17	247.821	-73.349	45.364	no cnx
2020_08_21_exp1_TH	1	pyramidal	2	95	56.3338	Point 16	179.061	-177.325	43.054	no cnx
2020_08_21_exp1_TH	1	pyramidal	2	95	56.3338	Point 19	227.393	-203.629	43.054	no cnx
2020_08_21_exp1_TH	1	pyramidal	2	95	56.3338	Point 18	166.147	-205.777	43.054	no cnx
2020_08_21_exp1_TH	1	pyramidal	2	95	56.3338	Point 31	143.739	35.8442	23.344	no cnx
2020_08_21_exp1_TH	1	pyramidal	2	95	56.3338	Point 30	276.384	-53.568	23.344	no cnx
2020_08_21_exp1_TH	1	pyramidal	2	95	56.3338	Point 37	86.6739	-101.928	15.704	no cnx
2020_08_21_exp1_TH	1	pyramidal	2	95	56.3338	Point 36	174.058	32.4718	15.704	no cnx
2020_08_21_exp1_TH	1	pyramidal	2	95	56.3338	Point 35	155.372	65.1116	15.704	no cnx
2020_08_21_exp1_TH	1	pyramidal	2	95	56.3338	Point 34	169.132	57.5333	23.344	no cnx
2020_08_21_exp1_TH	1	pyramidal	2	95	56.3338	Point 5	243.776	-8.71975	68.664	no cnx
2020_08_21_exp1_TH	1	pyramidal	2	95	56.3338	Point 4	106.888	-32.9254	68.664	no cnx
2020_08_21_exp1_TH	1	pyramidal	2	95	56.3338	Point 7	121.155	-97.5357	59.584	no cnx
2020_08_21_exp1_TH	1	pyramidal	2	95	56.3338	Point 6	153.562	-41.6125	68.664	no cnx
2020_08_21_exp1_TH	1	pyramidal	2	95	56.3338	Point 1	150.422	-216.089	76.574	no cnx
2020_08_21_exp1_TH	1	pyramidal	2	95	56.3338	Point 3	79.2683	-34.2526	76.574	no cnx
2020_08_21_exp1_TH	1	pyramidal	2	95	56.3338	Point 2	307.068	-222.279	76.574	no cnx
2020_08_21_exp1_TH	1	pyramidal	2	95	56.3338	Point 9	150.082	-8.7229	59.584	no cnx
2020_08_21_exp1_TH	1	pyramidal	2	95	56.3338	Point 8	168.184	-38.8001	59.584	no cnx
2020_08_21_exp1_TH	1	pyramidal	2	95	56.3338	Point 32	102.737	30.8694	23.344	no cnx
2020_08_21_exp1_TH	1	pyramidal	2	95	56.3338	Point 48	94.047	-93.3771	47.894	no cnx
2020_08_21_exp1_TH	1	pyramidal	2	95	56.3338	Point 49	250.131	18.0704	47.894	no cnx
2020_08_21_exp1_TH	1	pyramidal	2	95	56.3338	Point 42	203.868	-68.0297	7.464	no cnx
2020_08_21_exp1_TH	1	pyramidal	2	95	56.3338	Point 43	92.1192	-104.587	7.464	no cnx
2020_08_21_exp1_TH	1	pyramidal	2	95	56.3338	Point 40	145.408	24.1758	7.464	no cnx
2020_08_21_exp1_TH	1	pyramidal	2	95	56.3338	Point 41	84.9642	-41.828	7.464	no cnx
2020_08_21_exp1_TH	1	pyramidal	2	95	56.3338	Point 46	178.146	-51.05	47.894	no cnx
2020_08_21_exp1_TH	1	pyramidal	2	95	56.3338	Point 47	152.003	-31.7334	47.894	no cnx
2020_08_21_exp1_TH	1	pyramidal	2	95	56.3338	Point 44	109.765	-90.3369	7.464	no cnx
2020_08_21_exp1_TH	1	pyramidal	2	95	56.3338	Point 45	137.307	7.948	47.894	no cnx
2020_08_21_exp1_TH	1	pyramidal	2	95	56.3338	Point 28	115.688	-43.4085	23.344	excitatory
2020_08_21_exp1_TH	1	pyramidal	2	95	56.3338	Point 29	171.847	-16.8704	23.344	no cnx
2020_08_21_exp1_TH	1	pyramidal	2	95	56.3338	Point 20	228.798	-212.159	43.054	no cnx
2020_08_21_exp1_TH	1	pyramidal	2	95	56.3338	Point 21	124.162	-162.892	35.484	no cnx
2020_08_21_exp1_TH	1	pyramidal	2	95	56.3338	Point 22	150.016	-145.141	35.484	no cnx
2020_08_21_exp1_TH	1	pyramidal	2	95	56.3338	Point 23	199.78	-136.518	35.484	no cnx
2020_08_21_exp1_TH	1	pyramidal	2	95	56.3338	Point 24	256.353	-144.853	35.484	no cnx
2020_08_21_exp1_TH	1	pyramidal	2	95	56.3338	Point 25	171.091	-146.18	35.484	no cnx
2020_08_21_exp1_TH	1	pyramidal	2	95	56.3338	Point 26	125.218	-145.46	35.484	no cnx
2020_08_21_exp1_TH	1	pyramidal	2	95	56.3338	Point 27	190.189	-174.925	23.344	no cnx
2020_08_21_exp1_TH	1	pyramidal	2	95	56.3338	Point 39	210.052	88.2741	15.704	no cnx
2020_08_21_exp1_TH	1	pyramidal	2	95	56.3338	Point 33	283.986	20.5305	23.344	no cnx
2020_08_21_exp1_TH	1	pyramidal	2	95	56.3338	Point 38	111.737	-26.6549	15.704	excitatory
2020_08_21_exp1_TH	0	pyramidal	2	109	26.124	Point 11	231.031	-128.865	54.564	no cnx
2020_08_21_exp1_TH	0	pyramidal	2	109	26.124	Point 10	191.084	-96.5367	59.584	no cnx
2020_08_21_exp1_TH	0	pyramidal	2	109	26.124	Point 13	198.605	-65.3681	45.364	no cnx
2020_08_21_exp1_TH	0	pyramidal	2	109	26.124	Point 12	318.617	-206.195	54.564	no cnx
2020_08_21_exp1_TH	0	pyramidal	2	109	26.124	Point 15	95.464	-126.991	45.364	no cnx
2020_08_21_exp1_TH	0	pyramidal	2	109	26.124	Point 14	127.8	-113.82	45.364	no cnx
2020_08_21_exp1_TH	0	pyramidal	2	109	26.124	Point 17	245.01	-177.368	45.364	no cnx
2020_08_21_exp1_TH	0	pyramidal	2	109	26.124	Point 16	176.25	-281.344	43.054	no cnx
2020_08_21_exp1_TH	0	pyramidal	2	109	26.124	Point 19	224.582	-307.648	43.054	no cnx
2020_08_21_exp1_TH	0	pyramidal	2	109	26.124	Point 18	163.336	-309.796	43.054	no cnx
2020_08_21_exp1_TH	0	pyramidal	2	109	26.124	Point 31	140.928	-68.1747	23.344	no cnx
2020_08_21_exp1_TH	0	pyramidal	2	109	26.124	Point 30	273.574	-157.587	23.344	no cnx
2020_08_21_exp1_TH	0	pyramidal	2	109	26.124	Point 37	83.8632	-205.947	15.704	no cnx
2020_08_21_exp1_TH	0	pyramidal	2	109	26.124	Point 36	171.247	-71.5471	15.704	no cnx
2020_08_21_exp1_TH	0	pyramidal	2	109	26.124	Point 35	152.562	-38.9073	15.704	no cnx
2020_08_21_exp1_TH	0	pyramidal	2	109	26.124	Point 34	166.321	-46.4855	23.344	no cnx
2020_08_21_exp1_TH	0	pyramidal	2	109	26.124	Point 5	240.965	-112.739	68.664	no cnx
2020_08_21_exp1_TH	0	pyramidal	2	109	26.124	Point 4	104.078	-136.944	68.664	no cnx
2020_08_21_exp1_TH	0	pyramidal	2	109	26.124	Point 7	118.345	-201.555	59.584	no cnx
2020_08_21_exp1_TH	0	pyramidal	2	109	26.124	Point 6	150.752	-145.631	68.664	no cnx
2020_08_21_exp1_TH	0	pyramidal	2	109	26.124	Point 1	147.611	-320.108	76.574	no cnx
2020_08_21_exp1_TH	0	pyramidal	2	109	26.124	Point 3	76.4576	-138.271	76.574	no cnx
2020_08_21_exp1_TH	0	pyramidal	2	109	26.124	Point 2	304.257	-326.298	76.574	no cnx
2020_08_21_exp1_TH	0	pyramidal	2	109	26.124	Point 9	147.271	-112.742	59.584	no cnx
2020_08_21_exp1_TH	0	pyramidal	2	109	26.124	Point 8	165.373	-142.819	59.584	no cnx
2020_08_21_exp1_TH	0	pyramidal	2	109	26.124	Point 32	99.926	-73.1495	23.344	no cnx
2020_08_21_exp1_TH	0	pyramidal	2	109	26.124	Point 48	91.2363	-197.396	47.894	no cnx
2020_08_21_exp1_TH	0	pyramidal	2	109	26.124	Point 49	247.321	-85.9484	47.894	no cnx
2020_08_21_exp1_TH	0	pyramidal	2	109	26.124	Point 42	201.057	-172.049	7.464	no cnx
2020_08_21_exp1_TH	0	pyramidal	2	109	26.124	Point 43	89.3085	-208.606	7.464	no cnx
2020_08_21_exp1_TH	0	pyramidal	2	109	26.124	Point 40	142.597	-79.843	7.464	no cnx
2020_08_21_exp1_TH	0	pyramidal	2	109	26.124	Point 41	82.1535	-145.847	7.464	no cnx
2020_08_21_exp1_TH	0	pyramidal	2	109	26.124	Point 46	175.335	-155.069	47.894	no cnx
2020_08_21_exp1_TH	0	pyramidal	2	109	26.124	Point 47	149.193	-135.752	47.894	no cnx
2020_08_21_exp1_TH	0	pyramidal	2	109	26.124	Point 44	106.954	-194.356	7.464	no cnx
2020_08_21_exp1_TH	0	pyramidal	2	109	26.124	Point 45	134.496	-96.0709	47.894	no cnx
2020_08_21_exp1_TH	0	pyramidal	2	109	26.124	Point 28	112.877	-147.427	23.344	no cnx
2020_08_21_exp1_TH	0	pyramidal	2	109	26.124	Point 29	169.036	-120.889	23.344	no cnx
2020_08_21_exp1_TH	0	pyramidal	2	109	26.124	Point 20	225.987	-316.178	43.054	no cnx
2020_08_21_exp1_TH	0	pyramidal	2	109	26.124	Point 21	121.352	-266.911	35.484	no cnx
2020_08_21_exp1_TH	0	pyramidal	2	109	26.124	Point 22	147.206	-249.16	35.484	no cnx
2020_08_21_exp1_TH	0	pyramidal	2	109	26.124	Point 23	196.969	-240.537	35.484	no cnx
2020_08_21_exp1_TH	0	pyramidal	2	109	26.124	Point 24	253.543	-248.872	35.484	no cnx
2020_08_21_exp1_TH	0	pyramidal	2	109	26.124	Point 25	168.28	-250.199	35.484	no cnx
2020_08_21_exp1_TH	0	pyramidal	2	109	26.124	Point 26	122.407	-249.479	35.484	no cnx
2020_08_21_exp1_TH	0	pyramidal	2	109	26.124	Point 27	187.378	-278.944	23.344	no cnx
2020_08_21_exp1_TH	0	pyramidal	2	109	26.124	Point 39	207.241	-15.7448	15.704	no cnx
2020_08_21_exp1_TH	0	pyramidal	2	109	26.124	Point 33	281.175	-83.4883	23.344	no cnx
2020_08_21_exp1_TH	0	pyramidal	2	109	26.124	Point 38	108.926	-130.674	15.704	no cnx
2020_08_06_exp2_TH	3	pyramidal	2	248	210.264	Point 11	237.274	-605.216	203.484	no cnx
2020_08_06_exp2_TH	3	pyramidal	2	248	210.264	Point 10	226.26	-188.287	187.244	no cnx
2020_08_06_exp2_TH	3	pyramidal	2	248	210.264	Point 13	211.807	-552.103	203.484	no cnx
2020_08_06_exp2_TH	3	pyramidal	2	248	210.264	Point 12	280.732	-534.348	203.484	no cnx
2020_08_06_exp2_TH	3	pyramidal	2	248	210.264	Point 15	232.061	-592.771	203.484	no cnx
2020_08_06_exp2_TH	3	pyramidal	2	248	210.264	Point 14	254.435	-448.521	203.484	no cnx
2020_08_06_exp2_TH	3	pyramidal	2	248	210.264	Point 17	149.158	-431.181	203.484	no cnx
2020_08_06_exp2_TH	3	pyramidal	2	248	210.264	Point 16	234.175	-525.178	203.484	no cnx
2020_08_06_exp2_TH	3	pyramidal	2	248	210.264	Point 19	252.521	-334.44	203.484	no cnx
2020_08_06_exp2_TH	3	pyramidal	2	248	210.264	Point 18	200.876	-381.429	203.484	no cnx
2020_08_06_exp2_TH	3	pyramidal	2	248	210.264	Point 31	126.057	-329.605	190.314	no cnx
2020_08_06_exp2_TH	3	pyramidal	2	248	210.264	Point 30	281.592	-407.125	190.314	no cnx
2020_08_06_exp2_TH	3	pyramidal	2	248	210.264	Point 37	349.516	-305.43	184.694	no cnx
2020_08_06_exp2_TH	3	pyramidal	2	248	210.264	Point 36	261.589	-323.35	184.694	no cnx
2020_08_06_exp2_TH	3	pyramidal	2	248	210.264	Point 35	182.969	-336.501	184.694	no cnx
2020_08_06_exp2_TH	3	pyramidal	2	248	210.264	Point 34	275.639	-314.855	184.694	no cnx
2020_08_06_exp2_TH	3	pyramidal	2	248	210.264	Point 5	122.839	44.8607	194.774	no cnx
2020_08_06_exp2_TH	3	pyramidal	2	248	210.264	Point 4	144.454	13.6962	194.774	no cnx
2020_08_06_exp2_TH	3	pyramidal	2	248	210.264	Point 7	256.946	-119.347	187.244	no cnx
2020_08_06_exp2_TH	3	pyramidal	2	248	210.264	Point 6	147.042	-229.811	194.774	no cnx
2020_08_06_exp2_TH	3	pyramidal	2	248	210.264	Point 1	198.163	-1.92488	194.774	no cnx
2020_08_06_exp2_TH	3	pyramidal	2	248	210.264	Point 3	186.588	-20.1797	194.774	no cnx
2020_08_06_exp2_TH	3	pyramidal	2	248	210.264	Point 2	120.384	-56.4731	194.774	no cnx
2020_08_06_exp2_TH	3	pyramidal	2	248	210.264	Point 9	178.54	-270.015	187.244	no cnx
2020_08_06_exp2_TH	3	pyramidal	2	248	210.264	Point 8	161.443	-62.6148	187.244	no cnx
2020_08_06_exp2_TH	3	pyramidal	2	248	210.264	Point 32	281.36	-498.614	190.314	no cnx
2020_08_06_exp2_TH	3	pyramidal	2	248	210.264	Point 48	284.63	83.0582	183.844	no cnx
2020_08_06_exp2_TH	3	pyramidal	2	248	210.264	Point 42	164.53	-176.489	169.054	no cnx
2020_08_06_exp2_TH	3	pyramidal	2	248	210.264	Point 43	296.625	-74.5325	169.054	no cnx
2020_08_06_exp2_TH	3	pyramidal	2	248	210.264	Point 40	250.783	-404.873	177.214	no cnx
2020_08_06_exp2_TH	3	pyramidal	2	248	210.264	Point 41	243.266	-248.723	169.054	no cnx
2020_08_06_exp2_TH	3	pyramidal	2	248	210.264	Point 46	180.248	-152.956	183.844	no cnx
2020_08_06_exp2_TH	3	pyramidal	2	248	210.264	Point 47	310.216	75.9502	183.844	no cnx
2020_08_06_exp2_TH	3	pyramidal	2	248	210.264	Point 44	94.5899	-55.9148	169.054	no cnx
2020_08_06_exp2_TH	3	pyramidal	2	248	210.264	Point 45	298.192	34.8658	183.844	no cnx
2020_08_06_exp2_TH	3	pyramidal	2	248	210.264	Point 28	199.582	-470.826	190.314	no cnx
2020_08_06_exp2_TH	3	pyramidal	2	248	210.264	Point 29	228.535	-561.739	190.314	no cnx
2020_08_06_exp2_TH	3	pyramidal	2	248	210.264	Point 20	242.494	-483.921	200.294	no cnx
2020_08_06_exp2_TH	3	pyramidal	2	248	210.264	Point 21	249.258	-412.925	200.294	no cnx
2020_08_06_exp2_TH	3	pyramidal	2	248	210.264	Point 22	277.509	-589.103	200.294	no cnx
2020_08_06_exp2_TH	3	pyramidal	2	248	210.264	Point 23	246.841	-473.862	200.294	no cnx
2020_08_06_exp2_TH	3	pyramidal	2	248	210.264	Point 24	185.926	-585.632	200.294	no cnx
2020_08_06_exp2_TH	3	pyramidal	2	248	210.264	Point 25	206.15	-366.703	200.294	no cnx
2020_08_06_exp2_TH	3	pyramidal	2	248	210.264	Point 26	185.692	-450.123	190.314	no cnx
2020_08_06_exp2_TH	3	pyramidal	2	248	210.264	Point 27	279.588	-423.616	190.314	no cnx
2020_08_06_exp2_TH	3	pyramidal	2	248	210.264	Point 39	185.412	-475.083	177.214	no cnx
2020_08_06_exp2_TH	3	pyramidal	2	248	210.264	Point 33	213.242	-407.731	184.694	no cnx
2020_08_06_exp2_TH	3	pyramidal	2	248	210.264	Point 38	303.313	-520.606	177.214	no cnx
2020_08_06_exp2_TH	2	pyramidal	2	226	218.614	Point 11	234.751	-564.359	203.484	no cnx
2020_08_06_exp2_TH	2	pyramidal	2	226	218.614	Point 10	223.737	-147.43	187.244	no cnx
2020_08_06_exp2_TH	2	pyramidal	2	226	218.614	Point 13	209.284	-511.246	203.484	no cnx
2020_08_06_exp2_TH	2	pyramidal	2	226	218.614	Point 12	278.209	-493.491	203.484	no cnx
2020_08_06_exp2_TH	2	pyramidal	2	226	218.614	Point 15	229.538	-551.914	203.484	no cnx
2020_08_06_exp2_TH	2	pyramidal	2	226	218.614	Point 14	251.911	-407.664	203.484	no cnx
2020_08_06_exp2_TH	2	pyramidal	2	226	218.614	Point 17	146.634	-390.324	203.484	no cnx
2020_08_06_exp2_TH	2	pyramidal	2	226	218.614	Point 16	231.652	-484.321	203.484	no cnx
2020_08_06_exp2_TH	2	pyramidal	2	226	218.614	Point 19	249.998	-293.583	203.484	no cnx
2020_08_06_exp2_TH	2	pyramidal	2	226	218.614	Point 18	198.352	-340.572	203.484	no cnx
2020_08_06_exp2_TH	2	pyramidal	2	226	218.614	Point 31	123.534	-288.748	190.314	no cnx
2020_08_06_exp2_TH	2	pyramidal	2	226	218.614	Point 30	279.069	-366.268	190.314	no cnx
2020_08_06_exp2_TH	2	pyramidal	2	226	218.614	Point 37	346.992	-264.573	184.694	no cnx
2020_08_06_exp2_TH	2	pyramidal	2	226	218.614	Point 36	259.066	-282.493	184.694	no cnx
2020_08_06_exp2_TH	2	pyramidal	2	226	218.614	Point 35	180.445	-295.644	184.694	no cnx
2020_08_06_exp2_TH	2	pyramidal	2	226	218.614	Point 34	273.116	-273.998	184.694	no cnx
2020_08_06_exp2_TH	2	pyramidal	2	226	218.614	Point 5	120.316	85.7177	194.774	no cnx
2020_08_06_exp2_TH	2	pyramidal	2	226	218.614	Point 4	141.931	54.5532	194.774	no cnx
2020_08_06_exp2_TH	2	pyramidal	2	226	218.614	Point 7	254.422	-78.4897	187.244	no cnx
2020_08_06_exp2_TH	2	pyramidal	2	226	218.614	Point 6	144.518	-188.954	194.774	no cnx
2020_08_06_exp2_TH	2	pyramidal	2	226	218.614	Point 1	195.639	38.9321	194.774	no cnx
2020_08_06_exp2_TH	2	pyramidal	2	226	218.614	Point 3	184.065	20.6773	194.774	no cnx
2020_08_06_exp2_TH	2	pyramidal	2	226	218.614	Point 2	117.861	-15.6161	194.774	no cnx
2020_08_06_exp2_TH	2	pyramidal	2	226	218.614	Point 9	176.017	-229.158	187.244	no cnx
2020_08_06_exp2_TH	2	pyramidal	2	226	218.614	Point 8	158.92	-21.7578	187.244	no cnx
2020_08_06_exp2_TH	2	pyramidal	2	226	218.614	Point 32	278.836	-457.757	190.314	no cnx
2020_08_06_exp2_TH	2	pyramidal	2	226	218.614	Point 48	282.107	123.915	183.844	no cnx
2020_08_06_exp2_TH	2	pyramidal	2	226	218.614	Point 42	162.007	-135.632	169.054	no cnx
2020_08_06_exp2_TH	2	pyramidal	2	226	218.614	Point 43	294.102	-33.6755	169.054	no cnx
2020_08_06_exp2_TH	2	pyramidal	2	226	218.614	Point 40	248.26	-364.016	177.214	no cnx
2020_08_06_exp2_TH	2	pyramidal	2	226	218.614	Point 41	240.743	-207.866	169.054	no cnx
2020_08_06_exp2_TH	2	pyramidal	2	226	218.614	Point 46	177.725	-112.099	183.844	no cnx
2020_08_06_exp2_TH	2	pyramidal	2	226	218.614	Point 47	307.693	116.807	183.844	no cnx
2020_08_06_exp2_TH	2	pyramidal	2	226	218.614	Point 44	92.0667	-15.0578	169.054	no cnx
2020_08_06_exp2_TH	2	pyramidal	2	226	218.614	Point 45	295.669	75.7228	183.844	no cnx
2020_08_06_exp2_TH	2	pyramidal	2	226	218.614	Point 28	197.059	-429.969	190.314	no cnx
2020_08_06_exp2_TH	2	pyramidal	2	226	218.614	Point 29	226.012	-520.882	190.314	no cnx
2020_08_06_exp2_TH	2	pyramidal	2	226	218.614	Point 20	239.971	-443.064	200.294	no cnx
2020_08_06_exp2_TH	2	pyramidal	2	226	218.614	Point 21	246.735	-372.068	200.294	no cnx
2020_08_06_exp2_TH	2	pyramidal	2	226	218.614	Point 22	274.986	-548.246	200.294	no cnx
2020_08_06_exp2_TH	2	pyramidal	2	226	218.614	Point 23	244.318	-433.005	200.294	no cnx
2020_08_06_exp2_TH	2	pyramidal	2	226	218.614	Point 24	183.402	-544.775	200.294	no cnx
2020_08_06_exp2_TH	2	pyramidal	2	226	218.614	Point 25	203.627	-325.846	200.294	no cnx
2020_08_06_exp2_TH	2	pyramidal	2	226	218.614	Point 26	183.169	-409.266	190.314	no cnx
2020_08_06_exp2_TH	2	pyramidal	2	226	218.614	Point 27	277.064	-382.759	190.314	no cnx
2020_08_06_exp2_TH	2	pyramidal	2	226	218.614	Point 39	182.889	-434.226	177.214	no cnx
2020_08_06_exp2_TH	2	pyramidal	2	226	218.614	Point 33	210.718	-366.874	184.694	no cnx
2020_08_06_exp2_TH	2	pyramidal	2	226	218.614	Point 38	300.79	-479.749	177.214	no cnx
2020_08_06_exp1_TH	3	pyramidal	2	210	254.964	Point 5	181.35	-271.575	246.964	no cnx
2020_08_06_exp1_TH	3	pyramidal	2	210	254.964	Point 4	112.174	-172.945	246.964	no cnx
2020_08_06_exp1_TH	3	pyramidal	2	210	254.964	Point 6	120.352	-12.1467	246.964	no cnx
2020_08_06_exp1_TH	3	pyramidal	2	210	254.964	Point 1	186.537	-119.658	246.964	no cnx
2020_08_06_exp1_TH	3	pyramidal	2	210	254.964	Point 3	133.621	-63.3707	246.964	no cnx
2020_08_06_exp1_TH	3	pyramidal	2	210	254.964	Point 2	182.879	-61.2654	246.964	no cnx
2020_08_06_exp1_TH	0	pyramidal	2	206	228.774	Point 11	224.75	137.321	239.434	no cnx
2020_08_06_exp1_TH	0	pyramidal	2	206	228.774	Point 10	183.478	85.6799	239.434	no cnx
2020_08_06_exp1_TH	0	pyramidal	2	206	228.774	Point 13	91.762	46.3872	227.994	no cnx
2020_08_06_exp1_TH	0	pyramidal	2	206	228.774	Point 38	197.826	-168.363	220.304	no cnx
2020_08_06_exp1_TH	0	pyramidal	2	206	228.774	Point 15	201.619	90.2566	227.994	no cnx
2020_08_06_exp1_TH	0	pyramidal	2	206	228.774	Point 14	188.494	-69.7489	227.994	no cnx
2020_08_06_exp1_TH	0	pyramidal	2	206	228.774	Point 17	220.362	120.978	227.994	no cnx
2020_08_06_exp1_TH	0	pyramidal	2	206	228.774	Point 16	159.051	-6.38742	227.994	no cnx
2020_08_06_exp1_TH	0	pyramidal	2	206	228.774	Point 19	207.31	-12.2399	211.464	no cnx
2020_08_06_exp1_TH	0	pyramidal	2	206	228.774	Point 18	93.2802	154.93	227.994	no cnx
2020_08_06_exp1_TH	0	pyramidal	2	206	228.774	Point 31	204.653	-413.407	206.304	no cnx
2020_08_06_exp1_TH	0	pyramidal	2	206	228.774	Point 30	246.582	-133.833	220.304	no cnx
2020_08_06_exp1_TH	0	pyramidal	2	206	228.774	Point 37	226.476	-248.662	220.304	no cnx
2020_08_06_exp1_TH	0	pyramidal	2	206	228.774	Point 36	242.124	-331.153	206.304	no cnx
2020_08_06_exp1_TH	0	pyramidal	2	206	228.774	Point 35	254.17	-215.593	206.304	no cnx
2020_08_06_exp1_TH	0	pyramidal	2	206	228.774	Point 34	205.247	-400.476	206.304	no cnx
2020_08_06_exp1_TH	0	pyramidal	2	206	228.774	Point 5	191.387	-48.1421	246.964	no cnx
2020_08_06_exp1_TH	0	pyramidal	2	206	228.774	Point 4	122.212	50.4873	246.964	no cnx
2020_08_06_exp1_TH	0	pyramidal	2	206	228.774	Point 7	122.833	148.934	239.434	no cnx
2020_08_06_exp1_TH	0	pyramidal	2	206	228.774	Point 6	130.389	211.286	246.964	no cnx
2020_08_06_exp1_TH	0	pyramidal	2	206	228.774	Point 1	196.574	103.775	246.964	no cnx
2020_08_06_exp1_TH	0	pyramidal	2	206	228.774	Point 3	143.659	160.062	246.964	no cnx
2020_08_06_exp1_TH	0	pyramidal	2	206	228.774	Point 2	192.917	162.167	246.964	no cnx
2020_08_06_exp1_TH	0	pyramidal	2	206	228.774	Point 9	159.925	42.4691	239.434	no cnx
2020_08_06_exp1_TH	0	pyramidal	2	206	228.774	Point 8	253.208	-14.5804	239.434	no cnx
2020_08_06_exp1_TH	0	pyramidal	2	206	228.774	Point 32	281.131	-283.182	206.304	no cnx
2020_08_06_exp1_TH	0	pyramidal	2	206	228.774	Point 40	212.603	-158.167	220.304	no cnx
2020_08_06_exp1_TH	0	pyramidal	2	206	228.774	Point 41	196.202	-290.182	220.304	no cnx
2020_08_06_exp1_TH	0	pyramidal	2	206	228.774	Point 28	202.387	-307.243	220.304	no cnx
2020_08_06_exp1_TH	0	pyramidal	2	206	228.774	Point 29	243.426	-255.11	220.304	no cnx
2020_08_06_exp1_TH	0	pyramidal	2	206	228.774	Point 20	186.079	53.8257	211.464	excitatory
2020_08_06_exp1_TH	0	pyramidal	2	206	228.774	Point 21	168.307	119.732	211.464	no cnx
2020_08_06_exp1_TH	0	pyramidal	2	206	228.774	Point 22	201.105	-55.0919	211.464	no cnx
2020_08_06_exp1_TH	0	pyramidal	2	206	228.774	Point 23	146.399	-258.322	220.304	no cnx
2020_08_06_exp1_TH	0	pyramidal	2	206	228.774	Point 24	218.65	-300.679	220.304	no cnx
2020_08_06_exp1_TH	0	pyramidal	2	206	228.774	Point 25	183.501	-377.516	220.304	no cnx
2020_08_06_exp1_TH	0	pyramidal	2	206	228.774	Point 26	156.231	-202.612	220.304	no cnx
2020_08_06_exp1_TH	0	pyramidal	2	206	228.774	Point 27	244.95	-151.847	220.304	no cnx
2020_08_06_exp1_TH	0	pyramidal	2	206	228.774	Point 39	216.815	-228.473	220.304	no cnx
2020_08_06_exp1_TH	0	pyramidal	2	206	228.774	Point 33	208.591	-338.944	206.304	no cnx
2020_07_31_exp2_TH	3	pyramidal	2	193	301.934	Point 59	181.391	-17.3838	315.634	direct
2020_07_31_exp2_TH	3	pyramidal	2	193	301.934	Point 58	224.19	48.6891	315.634	excitatory
2020_07_31_exp2_TH	3	pyramidal	2	193	301.934	Point 55	125.47	352.637	207.954	no cnx
2020_07_31_exp2_TH	3	pyramidal	2	193	301.934	Point 54	144.406	354.814	207.954	no cnx
2020_07_31_exp2_TH	3	pyramidal	2	193	301.934	Point 57	197.355	-11.1073	315.634	direct
2020_07_31_exp2_TH	3	pyramidal	2	193	301.934	Point 56	163.362	291.199	207.954	no cnx
2020_07_31_exp2_TH	3	pyramidal	2	193	301.934	Point 51	146.208	412.282	207.954	no cnx
2020_07_31_exp2_TH	3	pyramidal	2	193	301.934	Point 50	231.997	411.714	234.704	no cnx
2020_07_31_exp2_TH	3	pyramidal	2	193	301.934	Point 53	237.417	400.281	207.954	no cnx
2020_07_31_exp2_TH	3	pyramidal	2	193	301.934	Point 52	160.844	346.098	207.954	no cnx
2020_07_31_exp2_TH	3	pyramidal	2	193	301.934	Point 11	102.729	-68.7285	272.524	no cnx
2020_07_31_exp2_TH	3	pyramidal	2	193	301.934	Point 10	149.325	10.6791	272.524	no cnx
2020_07_31_exp2_TH	3	pyramidal	2	193	301.934	Point 13	130.497	-92.8115	265.514	no cnx
2020_07_31_exp2_TH	3	pyramidal	2	193	301.934	Point 12	138.652	-41.1	272.524	no cnx
2020_07_31_exp2_TH	3	pyramidal	2	193	301.934	Point 15	178.475	-112.676	258.524	no cnx
2020_07_31_exp2_TH	3	pyramidal	2	193	301.934	Point 14	124.728	-75.9353	265.514	no cnx
2020_07_31_exp2_TH	3	pyramidal	2	193	301.934	Point 17	119.777	42.3446	258.524	no cnx
2020_07_31_exp2_TH	3	pyramidal	2	193	301.934	Point 16	131.387	-1.44089	258.524	no cnx
2020_07_31_exp2_TH	3	pyramidal	2	193	301.934	Point 19	123.423	-125.861	258.524	no cnx
2020_07_31_exp2_TH	3	pyramidal	2	193	301.934	Point 18	117.878	0.735407	258.524	no cnx
2020_07_31_exp2_TH	3	pyramidal	2	193	301.934	Point 31	154.616	-43.8462	238.744	no cnx
2020_07_31_exp2_TH	3	pyramidal	2	193	301.934	Point 30	61.0752	118.408	238.744	no cnx
2020_07_31_exp2_TH	3	pyramidal	2	193	301.934	Point 37	178.99	164.275	268.344	no cnx
2020_07_31_exp2_TH	3	pyramidal	2	193	301.934	Point 36	139.771	127.873	260.744	no cnx
2020_07_31_exp2_TH	3	pyramidal	2	193	301.934	Point 35	157.225	126.919	260.744	no cnx
2020_07_31_exp2_TH	3	pyramidal	2	193	301.934	Point 34	184.176	139.826	260.744	no cnx
2020_07_31_exp2_TH	3	pyramidal	2	193	301.934	Point 5	133.784	17.6278	283.004	no cnx
2020_07_31_exp2_TH	3	pyramidal	2	193	301.934	Point 4	229.458	47.0604	283.004	no cnx
2020_07_31_exp2_TH	3	pyramidal	2	193	301.934	Point 7	239.573	5.77615	283.004	direct
2020_07_31_exp2_TH	3	pyramidal	2	193	301.934	Point 6	111.379	-89.1802	283.004	no cnx
2020_07_31_exp2_TH	3	pyramidal	2	193	301.934	Point 1	97.5352	18.0948	283.004	no cnx
2020_07_31_exp2_TH	3	pyramidal	2	193	301.934	Point 3	153.221	31.202	283.004	no cnx
2020_07_31_exp2_TH	3	pyramidal	2	193	301.934	Point 2	137.671	-111.983	283.004	no cnx
2020_07_31_exp2_TH	3	pyramidal	2	193	301.934	Point 9	166.326	-99.9868	272.524	no cnx
2020_07_31_exp2_TH	3	pyramidal	2	193	301.934	Point 8	102.809	-55.6328	272.524	no cnx
2020_07_31_exp2_TH	3	pyramidal	2	193	301.934	Point 32	153.514	6.36618	238.744	direct
2020_07_31_exp2_TH	3	pyramidal	2	193	301.934	Point 48	136.844	383.376	234.704	no cnx
2020_07_31_exp2_TH	3	pyramidal	2	193	301.934	Point 49	135.3	346.745	234.704	no cnx
2020_07_31_exp2_TH	3	pyramidal	2	193	301.934	Point 42	105.254	316.278	248.194	no cnx
2020_07_31_exp2_TH	3	pyramidal	2	193	301.934	Point 43	73.7338	246.04	234.704	no cnx
2020_07_31_exp2_TH	3	pyramidal	2	193	301.934	Point 40	108.24	337.743	248.194	no cnx
2020_07_31_exp2_TH	3	pyramidal	2	193	301.934	Point 41	148.691	259.472	248.194	no cnx
2020_07_31_exp2_TH	3	pyramidal	2	193	301.934	Point 46	177.887	387.341	234.704	no cnx
2020_07_31_exp2_TH	3	pyramidal	2	193	301.934	Point 47	128.501	250.635	234.704	no cnx
2020_07_31_exp2_TH	3	pyramidal	2	193	301.934	Point 44	114.451	294.463	234.704	no cnx
2020_07_31_exp2_TH	3	pyramidal	2	193	301.934	Point 45	166.601	308.134	234.704	no cnx
2020_07_31_exp2_TH	3	pyramidal	2	193	301.934	Point 28	130.187	151.349	246.514	no cnx
2020_07_31_exp2_TH	3	pyramidal	2	193	301.934	Point 29	255.683	236.908	238.744	no cnx
2020_07_31_exp2_TH	3	pyramidal	2	193	301.934	Point 20	87.5983	-72.572	252.764	no cnx
2020_07_31_exp2_TH	3	pyramidal	2	193	301.934	Point 21	190.504	153.734	252.764	no cnx
2020_07_31_exp2_TH	3	pyramidal	2	193	301.934	Point 22	116.032	103.026	252.764	no cnx
2020_07_31_exp2_TH	3	pyramidal	2	193	301.934	Point 23	213.175	214.547	252.764	no cnx
2020_07_31_exp2_TH	3	pyramidal	2	193	301.934	Point 24	147.435	100.837	252.764	no cnx
2020_07_31_exp2_TH	3	pyramidal	2	193	301.934	Point 25	167.425	178.588	252.764	no cnx
2020_07_31_exp2_TH	3	pyramidal	2	193	301.934	Point 26	151.272	167.817	246.514	no cnx
2020_07_31_exp2_TH	3	pyramidal	2	193	301.934	Point 27	229.875	191.245	246.514	no cnx
2020_07_31_exp2_TH	3	pyramidal	2	193	301.934	Point 39	212.701	369.948	248.194	no cnx
2020_07_31_exp2_TH	3	pyramidal	2	193	301.934	Point 33	143.699	29.4062	238.744	no cnx
2020_07_31_exp2_TH	3	pyramidal	2	193	301.934	Point 38	134.989	187.643	268.344	no cnx
2020_07_31_exp2_TH	0	pyramidal	2	141	285.264	Point 55	119.991	507.574	207.954	no cnx
2020_07_31_exp2_TH	0	pyramidal	2	141	285.264	Point 54	138.927	509.752	207.954	no cnx
2020_07_31_exp2_TH	0	pyramidal	2	141	285.264	Point 56	157.882	446.137	207.954	no cnx
2020_07_31_exp2_TH	0	pyramidal	2	141	285.264	Point 51	140.728	567.219	207.954	no cnx
2020_07_31_exp2_TH	0	pyramidal	2	141	285.264	Point 50	226.517	566.652	234.704	no cnx
2020_07_31_exp2_TH	0	pyramidal	2	141	285.264	Point 53	231.937	555.219	207.954	no cnx
2020_07_31_exp2_TH	0	pyramidal	2	141	285.264	Point 52	155.364	501.035	207.954	no cnx
2020_07_31_exp2_TH	0	pyramidal	2	141	285.264	Point 11	97.2496	86.2089	272.524	no cnx
2020_07_31_exp2_TH	0	pyramidal	2	141	285.264	Point 10	143.845	165.617	272.524	no cnx
2020_07_31_exp2_TH	0	pyramidal	2	141	285.264	Point 13	125.017	62.1259	265.514	excitatory
2020_07_31_exp2_TH	0	pyramidal	2	141	285.264	Point 12	133.172	113.837	272.524	no cnx
2020_07_31_exp2_TH	0	pyramidal	2	141	285.264	Point 15	172.995	42.2617	258.524	no cnx
2020_07_31_exp2_TH	0	pyramidal	2	141	285.264	Point 14	119.248	79.0021	265.514	no cnx
2020_07_31_exp2_TH	0	pyramidal	2	141	285.264	Point 17	114.297	197.282	258.524	no cnx
2020_07_31_exp2_TH	0	pyramidal	2	141	285.264	Point 16	125.907	153.497	258.524	no cnx
2020_07_31_exp2_TH	0	pyramidal	2	141	285.264	Point 19	117.944	29.0764	258.524	no cnx
2020_07_31_exp2_TH	0	pyramidal	2	141	285.264	Point 18	112.399	155.673	258.524	no cnx
2020_07_31_exp2_TH	0	pyramidal	2	141	285.264	Point 31	149.137	111.091	238.744	no cnx
2020_07_31_exp2_TH	0	pyramidal	2	141	285.264	Point 30	55.5955	273.346	238.744	no cnx
2020_07_31_exp2_TH	0	pyramidal	2	141	285.264	Point 37	173.51	319.212	268.344	no cnx
2020_07_31_exp2_TH	0	pyramidal	2	141	285.264	Point 36	134.292	282.81	260.744	no cnx
2020_07_31_exp2_TH	0	pyramidal	2	141	285.264	Point 35	151.745	281.856	260.744	no cnx
2020_07_31_exp2_TH	0	pyramidal	2	141	285.264	Point 34	178.696	294.764	260.744	no cnx
2020_07_31_exp2_TH	0	pyramidal	2	141	285.264	Point 5	128.305	172.565	283.004	no cnx
2020_07_31_exp2_TH	0	pyramidal	2	141	285.264	Point 4	223.978	201.998	283.004	no cnx
2020_07_31_exp2_TH	0	pyramidal	2	141	285.264	Point 7	234.093	160.714	283.004	no cnx
2020_07_31_exp2_TH	0	pyramidal	2	141	285.264	Point 6	105.899	65.7572	283.004	no cnx
2020_07_31_exp2_TH	0	pyramidal	2	141	285.264	Point 1	92.0555	173.032	283.004	no cnx
2020_07_31_exp2_TH	0	pyramidal	2	141	285.264	Point 3	147.741	186.139	283.004	no cnx
2020_07_31_exp2_TH	0	pyramidal	2	141	285.264	Point 2	132.191	42.9541	283.004	no cnx
2020_07_31_exp2_TH	0	pyramidal	2	141	285.264	Point 9	160.846	54.9506	272.524	no cnx
2020_07_31_exp2_TH	0	pyramidal	2	141	285.264	Point 8	97.3296	99.3046	272.524	no cnx
2020_07_31_exp2_TH	0	pyramidal	2	141	285.264	Point 32	148.034	161.304	238.744	no cnx
2020_07_31_exp2_TH	0	pyramidal	2	141	285.264	Point 48	131.364	538.314	234.704	no cnx
2020_07_31_exp2_TH	0	pyramidal	2	141	285.264	Point 49	129.82	501.682	234.704	no cnx
2020_07_31_exp2_TH	0	pyramidal	2	141	285.264	Point 42	99.7742	471.215	248.194	no cnx
2020_07_31_exp2_TH	0	pyramidal	2	141	285.264	Point 43	68.2541	400.978	234.704	no cnx
2020_07_31_exp2_TH	0	pyramidal	2	141	285.264	Point 40	102.761	492.68	248.194	no cnx
2020_07_31_exp2_TH	0	pyramidal	2	141	285.264	Point 41	143.211	414.41	248.194	no cnx
2020_07_31_exp2_TH	0	pyramidal	2	141	285.264	Point 46	172.407	542.279	234.704	no cnx
2020_07_31_exp2_TH	0	pyramidal	2	141	285.264	Point 47	123.022	405.572	234.704	no cnx
2020_07_31_exp2_TH	0	pyramidal	2	141	285.264	Point 44	108.971	449.4	234.704	no cnx
2020_07_31_exp2_TH	0	pyramidal	2	141	285.264	Point 45	161.121	463.071	234.704	no cnx
2020_07_31_exp2_TH	0	pyramidal	2	141	285.264	Point 28	124.707	306.287	246.514	no cnx
2020_07_31_exp2_TH	0	pyramidal	2	141	285.264	Point 29	250.203	391.845	238.744	no cnx
2020_07_31_exp2_TH	0	pyramidal	2	141	285.264	Point 20	82.1185	82.3654	252.764	no cnx
2020_07_31_exp2_TH	0	pyramidal	2	141	285.264	Point 21	185.025	308.671	252.764	no cnx
2020_07_31_exp2_TH	0	pyramidal	2	141	285.264	Point 22	110.552	257.963	252.764	no cnx
2020_07_31_exp2_TH	0	pyramidal	2	141	285.264	Point 23	207.696	369.484	252.764	no cnx
2020_07_31_exp2_TH	0	pyramidal	2	141	285.264	Point 24	141.955	255.775	252.764	excitatory
2020_07_31_exp2_TH	0	pyramidal	2	141	285.264	Point 25	161.946	333.525	252.764	no cnx
2020_07_31_exp2_TH	0	pyramidal	2	141	285.264	Point 26	145.792	322.754	246.514	no cnx
2020_07_31_exp2_TH	0	pyramidal	2	141	285.264	Point 27	224.396	346.183	246.514	no cnx
2020_07_31_exp2_TH	0	pyramidal	2	141	285.264	Point 39	207.222	524.885	248.194	no cnx
2020_07_31_exp2_TH	0	pyramidal	2	141	285.264	Point 33	138.219	184.344	238.744	no cnx
2020_07_31_exp2_TH	0	pyramidal	2	141	285.264	Point 38	129.509	342.581	268.344	no cnx
2020_07_31_exp1_TH	2	pyramidal	2	184	361.944	Point 5	152.765	26.0314	368.204	no cnx
2020_07_31_exp1_TH	2	pyramidal	2	184	361.944	Point 4	147.012	167.787	374.964	no cnx
2020_07_31_exp1_TH	2	pyramidal	2	184	361.944	Point 7	232.842	76.8924	368.204	no cnx
2020_07_31_exp1_TH	2	pyramidal	2	184	361.944	Point 6	210.409	39.6495	368.204	no cnx
2020_07_31_exp1_TH	2	pyramidal	2	184	361.944	Point 1	205.459	85.3612	374.964	no cnx
2020_07_31_exp1_TH	2	pyramidal	2	184	361.944	Point 3	188.168	119.452	374.964	no cnx
2020_07_31_exp1_TH	2	pyramidal	2	184	361.944	Point 2	226.935	178.158	374.964	no cnx
2020_07_31_exp1_TH	2	pyramidal	2	184	361.944	Point 21	134.698	216.081	335.504	no cnx
2020_07_31_exp1_TH	2	pyramidal	2	184	361.944	Point 9	196.367	162.556	368.204	no cnx
2020_07_31_exp1_TH	2	pyramidal	2	184	361.944	Point 8	258.87	145.559	368.204	no cnx
2020_07_31_exp1_TH	2	pyramidal	2	184	361.944	Point 11	258.608	185.531	350.334	no cnx
2020_07_31_exp1_TH	2	pyramidal	2	184	361.944	Point 10	128.904	171.237	368.204	no cnx
2020_07_31_exp1_TH	2	pyramidal	2	184	361.944	Point 13	194.245	235.595	350.334	no cnx
2020_07_31_exp1_TH	2	pyramidal	2	184	361.944	Point 12	256.886	267.979	350.334	no cnx
2020_07_31_exp1_TH	2	pyramidal	2	184	361.944	Point 15	161.702	222.392	335.504	no cnx
2020_07_31_exp1_TH	2	pyramidal	2	184	361.944	Point 14	125.342	215.002	350.334	no cnx
2020_07_31_exp1_TH	2	pyramidal	2	184	361.944	Point 17	158.216	253.429	335.504	no cnx
2020_07_31_exp1_TH	2	pyramidal	2	184	361.944	Point 16	199.959	376.265	335.504	no cnx
2020_07_31_exp1_TH	2	pyramidal	2	184	361.944	Point 19	193.381	395.977	335.504	no cnx
2020_07_31_exp1_TH	2	pyramidal	2	184	361.944	Point 18	132.543	276.762	335.504	no cnx
2020_07_31_exp1_TH	2	pyramidal	2	184	361.944	Point 20	187.272	362.128	335.504	no cnx
2020_07_30_exp3_TH	3	pyramidal	2	231	151	Point 11	57.9567	110.961	124.844	no cnx
2020_07_30_exp3_TH	3	pyramidal	2	231	151	Point 10	108.177	-213.521	125.594	no cnx
2020_07_30_exp3_TH	3	pyramidal	2	231	151	Point 13	41.5809	126.752	124.844	no cnx
2020_07_30_exp3_TH	3	pyramidal	2	231	151	Point 12	94.9596	235.09	124.844	no cnx
2020_07_30_exp3_TH	3	pyramidal	2	231	151	Point 15	102.972	345.387	124.844	no cnx
2020_07_30_exp3_TH	3	pyramidal	2	231	151	Point 14	114.457	269.439	124.844	no cnx
2020_07_30_exp3_TH	3	pyramidal	2	231	151	Point 17	87.5425	362.295	124.844	no cnx
2020_07_30_exp3_TH	3	pyramidal	2	231	151	Point 16	105.255	186.062	124.844	no cnx
2020_07_30_exp3_TH	3	pyramidal	2	231	151	Point 19	105.407	239.299	108.504	no cnx
2020_07_30_exp3_TH	3	pyramidal	2	231	151	Point 18	92.8727	283.43	108.504	no cnx
2020_07_30_exp3_TH	3	pyramidal	2	231	151	Point 31	94.8822	8.43883	89.344	no cnx
2020_07_30_exp3_TH	3	pyramidal	2	231	151	Point 30	133.393	230.339	87.534	no cnx
2020_07_30_exp3_TH	3	pyramidal	2	231	151	Point 36	329.467	-69.2834	156.564	no cnx
2020_07_30_exp3_TH	3	pyramidal	2	231	151	Point 35	192.636	-231.866	120.234	no cnx
2020_07_30_exp3_TH	3	pyramidal	2	231	151	Point 34	115.337	-140.165	120.234	no cnx
2020_07_30_exp3_TH	3	pyramidal	2	231	151	Point 5	72.8109	89.3421	113.314	no cnx
2020_07_30_exp3_TH	3	pyramidal	2	231	151	Point 4	83.2811	70.1339	113.314	no cnx
2020_07_30_exp3_TH	3	pyramidal	2	231	151	Point 7	115.674	-13.3369	101.564	no cnx
2020_07_30_exp3_TH	3	pyramidal	2	231	151	Point 6	93.6184	-31.3781	101.564	no cnx
2020_07_30_exp3_TH	3	pyramidal	2	231	151	Point 1	171.068	-26.6588	129.814	no cnx
2020_07_30_exp3_TH	3	pyramidal	2	231	151	Point 3	130.302	-138.693	113.314	no cnx
2020_07_30_exp3_TH	3	pyramidal	2	231	151	Point 2	145.931	27.4822	129.814	no cnx
2020_07_30_exp3_TH	3	pyramidal	2	231	151	Point 9	165.369	0.755146	95.704	no cnx
2020_07_30_exp3_TH	3	pyramidal	2	231	151	Point 8	109.844	74.5276	95.704	no cnx
2020_07_30_exp3_TH	3	pyramidal	2	231	151	Point 32	97.0328	89.6902	89.344	no cnx
2020_07_30_exp3_TH	3	pyramidal	2	231	151	Point 28	119.511	415.752	87.534	no cnx
2020_07_30_exp3_TH	3	pyramidal	2	231	151	Point 29	81.4396	381.328	87.534	no cnx
2020_07_30_exp3_TH	3	pyramidal	2	231	151	Point 20	89.1789	369.988	108.504	no cnx
2020_07_30_exp3_TH	3	pyramidal	2	231	151	Point 21	148.848	442.833	108.504	no cnx
2020_07_30_exp3_TH	3	pyramidal	2	231	151	Point 22	116.728	425.116	108.504	no cnx
2020_07_30_exp3_TH	3	pyramidal	2	231	151	Point 23	97.9614	444.197	99.454	no cnx
2020_07_30_exp3_TH	3	pyramidal	2	231	151	Point 24	109.674	293.445	99.454	no cnx
2020_07_30_exp3_TH	3	pyramidal	2	231	151	Point 25	118.553	349.387	99.454	no cnx
2020_07_30_exp3_TH	3	pyramidal	2	231	151	Point 26	120.707	374.659	99.454	no cnx
2020_07_30_exp3_TH	3	pyramidal	2	231	151	Point 27	137.237	462.775	87.534	no cnx
2020_07_30_exp3_TH	3	pyramidal	2	231	151	Point 33	87.3779	141.009	89.344	no cnx
2020_07_30_exp3_TH	1	pyramidal	2	254	171	Point 11	29.5514	373.703	124.844	no cnx
2020_07_30_exp3_TH	1	pyramidal	2	254	171	Point 10	79.772	49.2208	125.594	no cnx
2020_07_30_exp3_TH	1	pyramidal	2	254	171	Point 13	13.1756	389.494	124.844	no cnx
2020_07_30_exp3_TH	1	pyramidal	2	254	171	Point 12	66.5543	497.832	124.844	no cnx
2020_07_30_exp3_TH	1	pyramidal	2	254	171	Point 15	74.5664	608.129	124.844	no cnx
2020_07_30_exp3_TH	1	pyramidal	2	254	171	Point 14	86.052	532.181	124.844	no cnx
2020_07_30_exp3_TH	1	pyramidal	2	254	171	Point 17	59.1373	625.037	124.844	no cnx
2020_07_30_exp3_TH	1	pyramidal	2	254	171	Point 16	76.8497	448.804	124.844	no cnx
2020_07_30_exp3_TH	1	pyramidal	2	254	171	Point 19	77.0016	502.041	108.504	no cnx
2020_07_30_exp3_TH	1	pyramidal	2	254	171	Point 18	64.4674	546.172	108.504	no cnx
2020_07_30_exp3_TH	1	pyramidal	2	254	171	Point 31	66.477	271.181	89.344	no cnx
2020_07_30_exp3_TH	1	pyramidal	2	254	171	Point 30	104.988	493.081	87.534	no cnx
2020_07_30_exp3_TH	1	pyramidal	2	254	171	Point 36	301.062	193.459	156.564	no cnx
2020_07_30_exp3_TH	1	pyramidal	2	254	171	Point 35	164.23	30.876	120.234	no cnx
2020_07_30_exp3_TH	1	pyramidal	2	254	171	Point 34	86.9313	122.577	120.234	no cnx
2020_07_30_exp3_TH	1	pyramidal	2	254	171	Point 7	87.2688	249.405	101.564	no cnx
2020_07_30_exp3_TH	1	pyramidal	2	254	171	Point 6	65.2131	231.364	101.564	no cnx
2020_07_30_exp3_TH	1	pyramidal	2	254	171	Point 9	136.964	263.497	95.704	no cnx
2020_07_30_exp3_TH	1	pyramidal	2	254	171	Point 8	81.4385	337.27	95.704	no cnx
2020_07_30_exp3_TH	1	pyramidal	2	254	171	Point 32	68.6275	352.432	89.344	no cnx
2020_07_30_exp3_TH	1	pyramidal	2	254	171	Point 28	91.1062	678.494	87.534	no cnx
2020_07_30_exp3_TH	1	pyramidal	2	254	171	Point 29	53.0343	644.07	87.534	no cnx
2020_07_30_exp3_TH	1	pyramidal	2	254	171	Point 20	60.7736	632.73	108.504	no cnx
2020_07_30_exp3_TH	1	pyramidal	2	254	171	Point 21	120.443	705.575	108.504	no cnx
2020_07_30_exp3_TH	1	pyramidal	2	254	171	Point 22	88.3222	687.858	108.504	no cnx
2020_07_30_exp3_TH	1	pyramidal	2	254	171	Point 23	69.5561	706.939	99.454	no cnx
2020_07_30_exp3_TH	1	pyramidal	2	254	171	Point 24	81.2687	556.187	99.454	no cnx
2020_07_30_exp3_TH	1	pyramidal	2	254	171	Point 25	90.148	612.129	99.454	no cnx
2020_07_30_exp3_TH	1	pyramidal	2	254	171	Point 26	92.3017	637.401	99.454	no cnx
2020_07_30_exp3_TH	1	pyramidal	2	254	171	Point 27	108.831	725.517	87.534	no cnx
2020_07_30_exp3_TH	1	pyramidal	2	254	171	Point 33	58.9726	403.751	89.344	no cnx
2020_07_30_exp2_TH	3	pyramidal	2	158	118.604	Point 11	106.618	89.4906	116.494	no cnx
2020_07_30_exp2_TH	3	pyramidal	2	158	118.604	Point 10	175.756	60.0859	113.964	no cnx
2020_07_30_exp2_TH	3	pyramidal	2	158	118.604	Point 13	111.763	-18.3681	116.164	no cnx
2020_07_30_exp2_TH	3	pyramidal	2	158	118.604	Point 12	120.624	40.1105	113.964	no cnx
2020_07_30_exp2_TH	3	pyramidal	2	158	118.604	Point 14	106.889	20.215	116.164	no cnx
2020_07_30_exp2_TH	3	pyramidal	2	158	118.604	Point 16	163.069	53.5482	115.754	no cnx
2020_07_30_exp2_TH	3	pyramidal	2	158	118.604	Point 19	146.093	93.1836	102.774	no cnx
2020_07_30_exp2_TH	3	pyramidal	2	158	118.604	Point 18	106.101	168.053	116.164	no cnx
2020_07_30_exp2_TH	3	pyramidal	2	158	118.604	Point 31	119.766	302.528	93.924	no cnx
2020_07_30_exp2_TH	3	pyramidal	2	158	118.604	Point 30	112.703	281.451	93.924	no cnx
2020_07_30_exp2_TH	3	pyramidal	2	158	118.604	Point 37	56.591	237.671	65.054	no cnx
2020_07_30_exp2_TH	3	pyramidal	2	158	118.604	Point 36	166.645	224.704	82.454	no cnx
2020_07_30_exp2_TH	3	pyramidal	2	158	118.604	Point 35	117.964	274.181	82.454	no cnx
2020_07_30_exp2_TH	3	pyramidal	2	158	118.604	Point 34	80.5278	238.125	82.454	no cnx
2020_07_30_exp2_TH	3	pyramidal	2	158	118.604	Point 5	198.984	104.762	120.754	no cnx
2020_07_30_exp2_TH	3	pyramidal	2	158	118.604	Point 4	226.172	78.9886	120.744	no cnx
2020_07_30_exp2_TH	3	pyramidal	2	158	118.604	Point 7	97.8614	-70.9856	113.964	no cnx
2020_07_30_exp2_TH	3	pyramidal	2	158	118.604	Point 6	181.612	-83.8386	113.964	no cnx
2020_07_30_exp2_TH	3	pyramidal	2	158	118.604	Point 1	192.579	-167.389	120.744	no cnx
2020_07_30_exp2_TH	3	pyramidal	2	158	118.604	Point 3	153.23	-10.6756	120.744	no cnx
2020_07_30_exp2_TH	3	pyramidal	2	158	118.604	Point 2	153.394	-82.3951	120.744	no cnx
2020_07_30_exp2_TH	3	pyramidal	2	158	118.604	Point 9	116.254	-2.20354	113.964	no cnx
2020_07_30_exp2_TH	3	pyramidal	2	158	118.604	Point 8	74.0717	-32.4903	113.964	no cnx
2020_07_30_exp2_TH	3	pyramidal	2	158	118.604	Point 32	162.232	74.4869	82.454	no cnx
2020_07_30_exp2_TH	3	pyramidal	2	158	118.604	Point 48	177.714	-142.753	91.214	no cnx
2020_07_30_exp2_TH	3	pyramidal	2	158	118.604	Point 42	105.892	-174.792	98.944	no cnx
2020_07_30_exp2_TH	3	pyramidal	2	158	118.604	Point 43	128.715	-156.191	98.944	no cnx
2020_07_30_exp2_TH	3	pyramidal	2	158	118.604	Point 40	80.9687	335.546	65.054	no cnx
2020_07_30_exp2_TH	3	pyramidal	2	158	118.604	Point 41	154.084	343.015	65.054	no cnx
2020_07_30_exp2_TH	3	pyramidal	2	158	118.604	Point 46	177.067	-9.96416	91.214	direct
2020_07_30_exp2_TH	3	pyramidal	2	158	118.604	Point 47	93.845	-3.24432	91.214	no cnx
2020_07_30_exp2_TH	3	pyramidal	2	158	118.604	Point 44	89.9041	-118.665	91.214	no cnx
2020_07_30_exp2_TH	3	pyramidal	2	158	118.604	Point 45	119.733	-70.5218	91.214	no cnx
2020_07_30_exp2_TH	3	pyramidal	2	158	118.604	Point 28	94.4668	300.344	93.924	no cnx
2020_07_30_exp2_TH	3	pyramidal	2	158	118.604	Point 29	120.004	232.65	93.924	no cnx
2020_07_30_exp2_TH	3	pyramidal	2	158	118.604	Point 20	112.05	98.3551	102.774	excitatory
2020_07_30_exp2_TH	3	pyramidal	2	158	118.604	Point 21	95.6619	140.579	102.774	no cnx
2020_07_30_exp2_TH	3	pyramidal	2	158	118.604	Point 22	118.206	134.415	102.774	no cnx
2020_07_30_exp2_TH	3	pyramidal	2	158	118.604	Point 23	92.283	224.474	102.774	no cnx
2020_07_30_exp2_TH	3	pyramidal	2	158	118.604	Point 24	148.26	297.034	102.774	no cnx
2020_07_30_exp2_TH	3	pyramidal	2	158	118.604	Point 25	100.529	165.476	102.774	no cnx
2020_07_30_exp2_TH	3	pyramidal	2	158	118.604	Point 26	111.207	151.768	93.924	no cnx
2020_07_30_exp2_TH	3	pyramidal	2	158	118.604	Point 27	117.718	205.987	93.924	no cnx
2020_07_30_exp2_TH	3	pyramidal	2	158	118.604	Point 39	87.8592	295.979	65.054	no cnx
2020_07_30_exp2_TH	3	pyramidal	2	158	118.604	Point 33	135.794	89.9693	82.454	no cnx
2020_07_30_exp2_TH	3	pyramidal	2	158	118.604	Point 38	96.3183	233.762	65.054	no cnx
2020_07_30_exp2_TH	2	pyramidal	2	183	112.564	Point 11	112.547	154.2	116.494	no cnx
2020_07_30_exp2_TH	2	pyramidal	2	183	112.564	Point 10	181.685	124.795	113.964	no cnx
2020_07_30_exp2_TH	2	pyramidal	2	183	112.564	Point 13	117.693	46.3411	116.164	no cnx
2020_07_30_exp2_TH	2	pyramidal	2	183	112.564	Point 12	126.554	104.82	113.964	no cnx
2020_07_30_exp2_TH	2	pyramidal	2	183	112.564	Point 15	116.033	262.457	116.164	no cnx
2020_07_30_exp2_TH	2	pyramidal	2	183	112.564	Point 14	112.818	84.9242	116.164	no cnx
2020_07_30_exp2_TH	2	pyramidal	2	183	112.564	Point 17	172.252	170.378	116.164	no cnx
2020_07_30_exp2_TH	2	pyramidal	2	183	112.564	Point 16	168.998	118.257	115.754	no cnx
2020_07_30_exp2_TH	2	pyramidal	2	183	112.564	Point 19	152.023	157.893	102.774	no cnx
2020_07_30_exp2_TH	2	pyramidal	2	183	112.564	Point 18	112.031	232.762	116.164	no cnx
2020_07_30_exp2_TH	2	pyramidal	2	183	112.564	Point 31	125.696	367.237	93.924	no cnx
2020_07_30_exp2_TH	2	pyramidal	2	183	112.564	Point 30	118.633	346.16	93.924	no cnx
2020_07_30_exp2_TH	2	pyramidal	2	183	112.564	Point 37	62.5205	302.38	65.054	no cnx
2020_07_30_exp2_TH	2	pyramidal	2	183	112.564	Point 36	172.574	289.413	82.454	no cnx
2020_07_30_exp2_TH	2	pyramidal	2	183	112.564	Point 35	123.894	338.891	82.454	no cnx
2020_07_30_exp2_TH	2	pyramidal	2	183	112.564	Point 34	86.4574	302.835	82.454	no cnx
2020_07_30_exp2_TH	2	pyramidal	2	183	112.564	Point 5	204.914	169.471	120.754	no cnx
2020_07_30_exp2_TH	2	pyramidal	2	183	112.564	Point 4	232.101	143.698	120.744	no cnx
2020_07_30_exp2_TH	2	pyramidal	2	183	112.564	Point 7	103.791	-6.27642	113.964	no cnx
2020_07_30_exp2_TH	2	pyramidal	2	183	112.564	Point 6	187.542	-19.1294	113.964	no cnx
2020_07_30_exp2_TH	2	pyramidal	2	183	112.564	Point 1	198.509	-102.68	120.744	no cnx
2020_07_30_exp2_TH	2	pyramidal	2	183	112.564	Point 3	159.159	54.0336	120.744	no cnx
2020_07_30_exp2_TH	2	pyramidal	2	183	112.564	Point 2	159.323	-17.6859	120.744	no cnx
2020_07_30_exp2_TH	2	pyramidal	2	183	112.564	Point 9	122.184	62.5057	113.964	no cnx
2020_07_30_exp2_TH	2	pyramidal	2	183	112.564	Point 8	80.0012	32.2189	113.964	no cnx
2020_07_30_exp2_TH	2	pyramidal	2	183	112.564	Point 32	168.161	139.196	82.454	no cnx
2020_07_30_exp2_TH	2	pyramidal	2	183	112.564	Point 40	86.8983	400.256	65.054	no cnx
2020_07_30_exp2_TH	2	pyramidal	2	183	112.564	Point 28	100.396	365.053	93.924	no cnx
2020_07_30_exp2_TH	2	pyramidal	2	183	112.564	Point 29	125.934	297.36	93.924	no cnx
2020_07_30_exp2_TH	2	pyramidal	2	183	112.564	Point 20	117.979	163.064	102.774	no cnx
2020_07_30_exp2_TH	2	pyramidal	2	183	112.564	Point 21	101.591	205.288	102.774	no cnx
2020_07_30_exp2_TH	2	pyramidal	2	183	112.564	Point 22	124.135	199.124	102.774	no cnx
2020_07_30_exp2_TH	2	pyramidal	2	183	112.564	Point 23	98.2126	289.183	102.774	no cnx
2020_07_30_exp2_TH	2	pyramidal	2	183	112.564	Point 24	154.189	361.743	102.774	no cnx
2020_07_30_exp2_TH	2	pyramidal	2	183	112.564	Point 25	106.459	230.186	102.774	no cnx
2020_07_30_exp2_TH	2	pyramidal	2	183	112.564	Point 26	117.136	216.477	93.924	no cnx
2020_07_30_exp2_TH	2	pyramidal	2	183	112.564	Point 27	123.647	270.696	93.924	no cnx
2020_07_30_exp2_TH	2	pyramidal	2	183	112.564	Point 33	141.723	154.679	82.454	no cnx
2020_07_30_exp2_TH	2	pyramidal	2	183	112.564	Point 38	102.248	298.471	65.054	no cnx
2020_07_30_exp1_TH	0	pyramidal	2	188	294.414	Point 5	107.554	232.986	215.894	no cnx
2020_07_30_exp1_TH	0	pyramidal	2	188	294.414	Point 4	138.529	220.346	238.184	no cnx
2020_07_30_exp1_TH	0	pyramidal	2	188	294.414	Point 7	115.321	259.453	206.204	no cnx
2020_07_30_exp1_TH	0	pyramidal	2	188	294.414	Point 6	110.294	278.013	215.894	no cnx
2020_07_30_exp1_TH	0	pyramidal	2	188	294.414	Point 1	140.457	83.7854	236.064	no cnx
2020_07_30_exp1_TH	0	pyramidal	2	188	294.414	Point 3	92.4559	213.439	238.184	no cnx
2020_07_30_exp1_TH	0	pyramidal	2	188	294.414	Point 2	127.4	80.2096	236.064	no cnx
2020_07_30_exp1_TH	0	pyramidal	2	188	294.414	Point 9	60.3182	254.265	206.204	no cnx
2020_07_30_exp1_TH	0	pyramidal	2	188	294.414	Point 8	140.802	288.905	206.204	no cnx
2020_07_30_exp1_TH	0	pyramidal	2	188	294.414	Point 11	114.048	292.279	202.264	no cnx
2020_07_30_exp1_TH	0	pyramidal	2	188	294.414	Point 10	58.0695	337.554	202.264	no cnx
2020_07_30_exp1_TH	0	pyramidal	2	188	294.414	Point 13	107.924	348.108	189.324	no cnx
2020_07_30_exp1_TH	0	pyramidal	2	188	294.414	Point 12	81.6471	326.034	189.324	no cnx
2020_07_30_exp1_TH	0	pyramidal	2	188	294.414	Point 14	151.092	390.574	189.324	no cnx
2020_05_27_exp2_TH	2	pyramidal	2	161	13.4309	Point 11	153.462	-292.847	-15.429	no cnx
2020_05_27_exp2_TH	2	pyramidal	2	161	13.4309	Point 10	163.925	-28.6383	-15.429	direct
2020_05_27_exp2_TH	2	pyramidal	2	161	13.4309	Point 13	152.874	-67.6342	-15.429	excitatory
2020_05_27_exp2_TH	2	pyramidal	2	161	13.4309	Point 12	225.838	-122.869	-15.429	no cnx
2020_05_27_exp2_TH	2	pyramidal	2	161	13.4309	Point 15	164.07	-223.51	-22.929	no cnx
2020_05_27_exp2_TH	2	pyramidal	2	161	13.4309	Point 14	168.635	-221.375	-15.429	no cnx
2020_05_27_exp2_TH	2	pyramidal	2	161	13.4309	Point 17	163.797	-133.729	-22.569	no cnx
2020_05_27_exp2_TH	2	pyramidal	2	161	13.4309	Point 16	161.487	-195.795	-22.929	no cnx
2020_05_27_exp2_TH	2	pyramidal	2	161	13.4309	Point 19	135.374	-82.9531	-22.929	no cnx
2020_05_27_exp2_TH	2	pyramidal	2	161	13.4309	Point 18	113.454	-116.428	-22.569	no cnx
2020_05_27_exp2_TH	2	pyramidal	2	161	13.4309	Point 5	193.614	-240.926	-6.609	no cnx
2020_05_27_exp2_TH	2	pyramidal	2	161	13.4309	Point 4	264.013	-36.387	-6.609	no cnx
2020_05_27_exp2_TH	2	pyramidal	2	161	13.4309	Point 7	131.11	-285.982	-15.429	no cnx
2020_05_27_exp2_TH	2	pyramidal	2	161	13.4309	Point 6	202.878	-58.8121	-6.609	no cnx
2020_05_27_exp2_TH	2	pyramidal	2	161	13.4309	Point 1	110.198	-228.013	-6.609	no cnx
2020_05_27_exp2_TH	2	pyramidal	2	161	13.4309	Point 3	206.701	-37.8385	-6.599	direct
2020_05_27_exp2_TH	2	pyramidal	2	161	13.4309	Point 2	222.285	-170.596	-6.609	no cnx
2020_05_27_exp2_TH	2	pyramidal	2	161	13.4309	Point 9	284.437	-146.104	-15.429	no cnx
2020_05_27_exp2_TH	2	pyramidal	2	161	13.4309	Point 8	175.839	-148.844	-15.429	no cnx
2020_05_27_exp2_TH	2	pyramidal	2	161	13.4309	Point 20	191.345	-51.2297	-22.569	direct
2020_05_27_exp2_TH	1	pyramidal	2	166	13.0408	Point 11	159.074	-173.35	-15.429	no cnx
2020_05_27_exp2_TH	1	pyramidal	2	166	13.0408	Point 10	169.538	90.8587	-15.429	no cnx
2020_05_27_exp2_TH	1	pyramidal	2	166	13.0408	Point 13	158.486	51.8628	-15.429	no cnx
2020_05_27_exp2_TH	1	pyramidal	2	166	13.0408	Point 12	231.45	-3.3718	-15.429	no cnx
2020_05_27_exp2_TH	1	pyramidal	2	166	13.0408	Point 15	169.682	-104.013	-22.929	no cnx
2020_05_27_exp2_TH	1	pyramidal	2	166	13.0408	Point 14	174.247	-101.878	-15.429	no cnx
2020_05_27_exp2_TH	1	pyramidal	2	166	13.0408	Point 17	169.409	-14.2324	-22.569	no cnx
2020_05_27_exp2_TH	1	pyramidal	2	166	13.0408	Point 16	167.099	-76.2983	-22.929	no cnx
2020_05_27_exp2_TH	1	pyramidal	2	166	13.0408	Point 19	140.986	36.5439	-22.929	no cnx
2020_05_27_exp2_TH	1	pyramidal	2	166	13.0408	Point 18	119.067	3.06889	-22.569	excitatory
2020_05_27_exp2_TH	1	pyramidal	2	166	13.0408	Point 31	173.31	-193.444	11.431	no cnx
2020_05_27_exp2_TH	1	pyramidal	2	166	13.0408	Point 30	195.576	-292.48	11.431	no cnx
2020_05_27_exp2_TH	1	pyramidal	2	166	13.0408	Point 37	244.279	-94.7256	2.991	no cnx
2020_05_27_exp2_TH	1	pyramidal	2	166	13.0408	Point 36	260.929	-192.772	2.991	no cnx
2020_05_27_exp2_TH	1	pyramidal	2	166	13.0408	Point 35	210.12	-78.4581	2.991	no cnx
2020_05_27_exp2_TH	1	pyramidal	2	166	13.0408	Point 34	226.571	-247.17	11.431	no cnx
2020_05_27_exp2_TH	1	pyramidal	2	166	13.0408	Point 5	199.226	-121.429	-6.609	no cnx
2020_05_27_exp2_TH	1	pyramidal	2	166	13.0408	Point 4	269.625	83.11	-6.609	no cnx
2020_05_27_exp2_TH	1	pyramidal	2	166	13.0408	Point 7	136.722	-166.485	-15.429	no cnx
2020_05_27_exp2_TH	1	pyramidal	2	166	13.0408	Point 6	208.49	60.6849	-6.609	no cnx
2020_05_27_exp2_TH	1	pyramidal	2	166	13.0408	Point 1	115.81	-108.516	-6.609	no cnx
2020_05_27_exp2_TH	1	pyramidal	2	166	13.0408	Point 3	212.313	81.6585	-6.599	no cnx
2020_05_27_exp2_TH	1	pyramidal	2	166	13.0408	Point 2	227.897	-51.0988	-6.609	no cnx
2020_05_27_exp2_TH	1	pyramidal	2	166	13.0408	Point 9	290.049	-26.6068	-15.429	no cnx
2020_05_27_exp2_TH	1	pyramidal	2	166	13.0408	Point 8	181.452	-29.3473	-15.429	excitatory
2020_05_27_exp2_TH	1	pyramidal	2	166	13.0408	Point 32	283.346	-168.061	11.431	no cnx
2020_05_27_exp2_TH	1	pyramidal	2	166	13.0408	Point 40	274.516	-249.301	2.991	no cnx
2020_05_27_exp2_TH	1	pyramidal	2	166	13.0408	Point 41	202.617	-342.682	2.991	no cnx
2020_05_27_exp2_TH	1	pyramidal	2	166	13.0408	Point 28	165.088	185.256	5.861	no cnx
2020_05_27_exp2_TH	1	pyramidal	2	166	13.0408	Point 29	340.565	157.14	5.861	no cnx
2020_05_27_exp2_TH	1	pyramidal	2	166	13.0408	Point 20	196.958	68.2673	-22.569	no cnx
2020_05_27_exp2_TH	1	pyramidal	2	166	13.0408	Point 21	271.547	-36.0267	5.861	no cnx
2020_05_27_exp2_TH	1	pyramidal	2	166	13.0408	Point 22	218.137	-62.089	5.861	no cnx
2020_05_27_exp2_TH	1	pyramidal	2	166	13.0408	Point 23	140.049	-94.7564	5.861	no cnx
2020_05_27_exp2_TH	1	pyramidal	2	166	13.0408	Point 24	151.205	-61.5941	5.861	no cnx
2020_05_27_exp2_TH	1	pyramidal	2	166	13.0408	Point 25	228.666	98.757	5.861	no cnx
2020_05_27_exp2_TH	1	pyramidal	2	166	13.0408	Point 26	155.998	114.86	5.861	no cnx
2020_05_27_exp2_TH	1	pyramidal	2	166	13.0408	Point 27	207.156	5.20313	5.861	direct
2020_05_27_exp2_TH	1	pyramidal	2	166	13.0408	Point 39	182.128	-133.081	2.991	no cnx
2020_05_27_exp2_TH	1	pyramidal	2	166	13.0408	Point 33	262.627	-262.523	11.431	no cnx
2020_05_27_exp2_TH	1	pyramidal	2	166	13.0408	Point 38	263.41	-247.834	2.991	no cnx
2020_05_27_exp2_TH	0	pyramidal	2	238	19.961	Point 11	159.588	-103.465	-15.429	no cnx
2020_05_27_exp2_TH	0	pyramidal	2	238	19.961	Point 10	170.051	160.744	-15.429	no cnx
2020_05_27_exp2_TH	0	pyramidal	2	238	19.961	Point 13	159	121.748	-15.429	no cnx
2020_05_27_exp2_TH	0	pyramidal	2	238	19.961	Point 12	231.964	66.513	-15.429	no cnx
2020_05_27_exp2_TH	0	pyramidal	2	238	19.961	Point 15	170.196	-34.1286	-22.929	no cnx
2020_05_27_exp2_TH	0	pyramidal	2	238	19.961	Point 14	174.761	-31.993	-15.429	no cnx
2020_05_27_exp2_TH	0	pyramidal	2	238	19.961	Point 17	169.923	55.6524	-22.569	no cnx
2020_05_27_exp2_TH	0	pyramidal	2	238	19.961	Point 16	167.613	-6.41348	-22.929	no cnx
2020_05_27_exp2_TH	0	pyramidal	2	238	19.961	Point 19	141.5	106.429	-22.929	no cnx
2020_05_27_exp2_TH	0	pyramidal	2	238	19.961	Point 18	119.58	72.9537	-22.569	no cnx
2020_05_27_exp2_TH	0	pyramidal	2	238	19.961	Point 31	173.824	-123.559	11.431	no cnx
2020_05_27_exp2_TH	0	pyramidal	2	238	19.961	Point 30	196.09	-222.595	11.431	no cnx
2020_05_27_exp2_TH	0	pyramidal	2	238	19.961	Point 37	244.793	-24.8408	2.991	no cnx
2020_05_27_exp2_TH	0	pyramidal	2	238	19.961	Point 36	261.443	-122.887	2.991	no cnx
2020_05_27_exp2_TH	0	pyramidal	2	238	19.961	Point 35	210.634	-8.57331	2.991	no cnx
2020_05_27_exp2_TH	0	pyramidal	2	238	19.961	Point 34	227.084	-177.285	11.431	no cnx
2020_05_27_exp2_TH	0	pyramidal	2	238	19.961	Point 5	199.739	-51.5437	-6.609	no cnx
2020_05_27_exp2_TH	0	pyramidal	2	238	19.961	Point 4	270.139	152.995	-6.609	no cnx
2020_05_27_exp2_TH	0	pyramidal	2	238	19.961	Point 7	137.236	-96.6	-15.429	no cnx
2020_05_27_exp2_TH	0	pyramidal	2	238	19.961	Point 6	209.004	130.57	-6.609	no cnx
2020_05_27_exp2_TH	0	pyramidal	2	238	19.961	Point 1	116.324	-38.6307	-6.609	no cnx
2020_05_27_exp2_TH	0	pyramidal	2	238	19.961	Point 3	212.827	151.543	-6.599	no cnx
2020_05_27_exp2_TH	0	pyramidal	2	238	19.961	Point 2	228.411	18.7861	-6.609	no cnx
2020_05_27_exp2_TH	0	pyramidal	2	238	19.961	Point 9	290.563	43.278	-15.429	no cnx
2020_05_27_exp2_TH	0	pyramidal	2	238	19.961	Point 8	181.965	40.5375	-15.429	no cnx
2020_05_27_exp2_TH	0	pyramidal	2	238	19.961	Point 32	283.86	-98.1758	11.431	no cnx
2020_05_27_exp2_TH	0	pyramidal	2	238	19.961	Point 40	275.03	-179.416	2.991	no cnx
2020_05_27_exp2_TH	0	pyramidal	2	238	19.961	Point 41	203.131	-272.797	2.991	no cnx
2020_05_27_exp2_TH	0	pyramidal	2	238	19.961	Point 28	165.601	255.141	5.861	no cnx
2020_05_27_exp2_TH	0	pyramidal	2	238	19.961	Point 29	341.079	227.025	5.861	no cnx
2020_05_27_exp2_TH	0	pyramidal	2	238	19.961	Point 20	197.471	138.152	-22.569	no cnx
2020_05_27_exp2_TH	0	pyramidal	2	238	19.961	Point 21	272.06	33.8581	5.861	no cnx
2020_05_27_exp2_TH	0	pyramidal	2	238	19.961	Point 22	218.651	7.79581	5.861	no cnx
2020_05_27_exp2_TH	0	pyramidal	2	238	19.961	Point 23	140.562	-24.8715	5.861	no cnx
2020_05_27_exp2_TH	0	pyramidal	2	238	19.961	Point 24	151.718	8.29072	5.861	no cnx
2020_05_27_exp2_TH	0	pyramidal	2	238	19.961	Point 25	229.179	168.642	5.861	no cnx
2020_05_27_exp2_TH	0	pyramidal	2	238	19.961	Point 26	156.512	184.745	5.861	no cnx
2020_05_27_exp2_TH	0	pyramidal	2	238	19.961	Point 27	207.67	75.088	5.861	no cnx
2020_05_27_exp2_TH	0	pyramidal	2	238	19.961	Point 39	182.642	-63.196	2.991	no cnx
2020_05_27_exp2_TH	0	pyramidal	2	238	19.961	Point 33	263.14	-192.638	11.431	no cnx
2020_05_27_exp2_TH	0	pyramidal	2	238	19.961	Point 38	263.924	-177.949	2.991	no cnx
2020_05_27_exp1_TH	1	pyramidal	2	164	67.371	Point 5	178.751	-146.15	73.551	excitatory
2020_05_27_exp1_TH	1	pyramidal	2	164	67.371	Point 4	148.891	-92.4171	73.551	no cnx
2020_05_27_exp1_TH	1	pyramidal	2	164	67.371	Point 7	195.157	-166.63	73.551	no cnx
2020_05_27_exp1_TH	1	pyramidal	2	164	67.371	Point 6	203.143	-61.6668	73.551	no cnx
2020_05_27_exp1_TH	1	pyramidal	2	164	67.371	Point 1	174.896	-172.432	73.551	no cnx
2020_05_27_exp1_TH	1	pyramidal	2	164	67.371	Point 3	196.139	-149.682	73.551	no cnx
2020_05_27_exp1_TH	1	pyramidal	2	164	67.371	Point 2	217.899	-78.5251	73.551	no cnx
2020_05_27_exp1_TH	1	pyramidal	2	164	67.371	Point 9	192.06	-107.365	68.701	no cnx
2020_05_27_exp1_TH	1	pyramidal	2	164	67.371	Point 8	176.589	46.9663	68.701	no cnx
2020_05_27_exp1_TH	1	pyramidal	2	164	67.371	Point 11	190.005	-189.577	68.701	no cnx
2020_05_27_exp1_TH	1	pyramidal	2	164	67.371	Point 10	203.474	-151.839	68.701	no cnx
2020_05_27_exp1_TH	1	pyramidal	2	164	67.371	Point 12	158.809	75.5771	68.711	no cnx
2020_05_26_exp2_TH	2	pyramidal	2	135	-3.05895	Point 51	177.443	293.555	-41.099	no cnx
2020_05_26_exp2_TH	2	pyramidal	2	135	-3.05895	Point 50	123.257	268.496	-41.099	no cnx
2020_05_26_exp2_TH	2	pyramidal	2	135	-3.05895	Point 11	172.186	-113.693	8.881	direct
2020_05_26_exp2_TH	2	pyramidal	2	135	-3.05895	Point 13	161.351	4.1294	8.881	no cnx
2020_05_26_exp2_TH	2	pyramidal	2	135	-3.05895	Point 12	142.241	-160.048	8.881	no cnx
2020_05_26_exp2_TH	2	pyramidal	2	135	-3.05895	Point 15	150.275	65.4368	8.881	direct
2020_05_26_exp2_TH	2	pyramidal	2	135	-3.05895	Point 14	320.853	13.9745	8.881	no cnx
2020_05_26_exp2_TH	2	pyramidal	2	135	-3.05895	Point 17	306.493	146.792	-0.129	no cnx
2020_05_26_exp2_TH	2	pyramidal	2	135	-3.05895	Point 16	312.056	57.7228	8.881	no cnx
2020_05_26_exp2_TH	2	pyramidal	2	135	-3.05895	Point 19	161.979	-35.4122	-0.129	no cnx
2020_05_26_exp2_TH	2	pyramidal	2	135	-3.05895	Point 18	202.196	-5.35715	-0.129	no cnx
2020_05_26_exp2_TH	2	pyramidal	2	135	-3.05895	Point 31	257.544	31.0173	-18.389	no cnx
2020_05_26_exp2_TH	2	pyramidal	2	135	-3.05895	Point 30	124.063	-10.2312	-18.389	direct
2020_05_26_exp2_TH	2	pyramidal	2	135	-3.05895	Point 37	109.777	40.2494	-29.339	no cnx
2020_05_26_exp2_TH	2	pyramidal	2	135	-3.05895	Point 35	139.073	75.047	-18.389	no cnx
2020_05_26_exp2_TH	2	pyramidal	2	135	-3.05895	Point 34	111.134	67.2766	-18.389	no cnx
2020_05_26_exp2_TH	2	pyramidal	2	135	-3.05895	Point 32	123.53	105.983	-18.389	no cnx
2020_05_26_exp2_TH	2	pyramidal	2	135	-3.05895	Point 48	164.208	313.498	-41.099	no cnx
2020_05_26_exp2_TH	2	pyramidal	2	135	-3.05895	Point 49	219.138	417.149	-41.099	no cnx
2020_05_26_exp2_TH	2	pyramidal	2	135	-3.05895	Point 42	164.896	254.795	-29.339	no cnx
2020_05_26_exp2_TH	2	pyramidal	2	135	-3.05895	Point 43	222.011	151.01	-28.709	no cnx
2020_05_26_exp2_TH	2	pyramidal	2	135	-3.05895	Point 40	151.184	185.654	-29.339	no cnx
2020_05_26_exp2_TH	2	pyramidal	2	135	-3.05895	Point 41	121.519	136.372	-29.339	no cnx
2020_05_26_exp2_TH	2	pyramidal	2	135	-3.05895	Point 46	109.673	122.476	-38.199	no cnx
2020_05_26_exp2_TH	2	pyramidal	2	135	-3.05895	Point 47	141.953	270.974	-38.199	no cnx
2020_05_26_exp2_TH	2	pyramidal	2	135	-3.05895	Point 44	124.928	294.936	-29.339	no cnx
2020_05_26_exp2_TH	2	pyramidal	2	135	-3.05895	Point 28	102.293	-20.1167	-18.389	no cnx
2020_05_26_exp2_TH	2	pyramidal	2	135	-3.05895	Point 29	155.517	-102.493	-18.389	no cnx
2020_05_26_exp2_TH	2	pyramidal	2	135	-3.05895	Point 20	156.949	-123.479	-0.129	no cnx
2020_05_26_exp2_TH	2	pyramidal	2	135	-3.05895	Point 21	129.449	-95.4973	-0.129	no cnx
2020_05_26_exp2_TH	2	pyramidal	2	135	-3.05895	Point 22	135.489	59.5055	-0.129	no cnx
2020_05_26_exp2_TH	2	pyramidal	2	135	-3.05895	Point 23	148.531	-37.7736	-0.129	no cnx
2020_05_26_exp2_TH	2	pyramidal	2	135	-3.05895	Point 24	193.031	-48.5576	-3.349	no cnx
2020_05_26_exp2_TH	2	pyramidal	2	135	-3.05895	Point 25	205.657	-34.4652	-6.149	no cnx
2020_05_26_exp2_TH	2	pyramidal	2	135	-3.05895	Point 26	108.977	-65.5288	-6.149	no cnx
2020_05_26_exp2_TH	2	pyramidal	2	135	-3.05895	Point 27	124.54	61.331	-3.349	no cnx
2020_05_26_exp2_TH	2	pyramidal	2	135	-3.05895	Point 39	173.559	84.1569	-29.339	no cnx
2020_05_26_exp2_TH	2	pyramidal	2	135	-3.05895	Point 33	130.238	-25.6874	-18.389	no cnx
2020_05_26_exp2_TH	2	pyramidal	2	135	-3.05895	Point 38	209.696	96.311	-29.339	no cnx
2020_05_26_exp2_TH	1	pyramidal	2	146	15.4418	Point 51	168.676	424.172	-41.099	no cnx
2020_05_26_exp2_TH	1	pyramidal	2	146	15.4418	Point 50	114.491	399.113	-41.099	no cnx
2020_05_26_exp2_TH	1	pyramidal	2	146	15.4418	Point 11	163.42	16.9237	8.881	patched
2020_05_26_exp2_TH	1	pyramidal	2	146	15.4418	Point 13	152.584	134.746	8.881	no cnx
2020_05_26_exp2_TH	1	pyramidal	2	146	15.4418	Point 12	133.474	-29.4312	8.881	no cnx
2020_05_26_exp2_TH	1	pyramidal	2	146	15.4418	Point 15	141.508	196.054	8.881	no cnx
2020_05_26_exp2_TH	1	pyramidal	2	146	15.4418	Point 14	312.086	144.591	8.881	no cnx
2020_05_26_exp2_TH	1	pyramidal	2	146	15.4418	Point 17	297.727	277.409	-0.129	no cnx
2020_05_26_exp2_TH	1	pyramidal	2	146	15.4418	Point 16	303.29	188.34	8.881	no cnx
2020_05_26_exp2_TH	1	pyramidal	2	146	15.4418	Point 19	153.212	95.2048	-0.129	excitatory
2020_05_26_exp2_TH	1	pyramidal	2	146	15.4418	Point 18	193.429	125.26	-0.129	no cnx
2020_05_26_exp2_TH	1	pyramidal	2	146	15.4418	Point 31	248.777	161.634	-18.389	no cnx
2020_05_26_exp2_TH	1	pyramidal	2	146	15.4418	Point 37	101.01	170.866	-29.339	no cnx
2020_05_26_exp2_TH	1	pyramidal	2	146	15.4418	Point 35	130.307	205.664	-18.389	no cnx
2020_05_26_exp2_TH	1	pyramidal	2	146	15.4418	Point 34	102.367	197.894	-18.389	no cnx
2020_05_26_exp2_TH	1	pyramidal	2	146	15.4418	Point 32	114.763	236.6	-18.389	no cnx
2020_05_26_exp2_TH	1	pyramidal	2	146	15.4418	Point 48	155.441	444.115	-41.099	no cnx
2020_05_26_exp2_TH	1	pyramidal	2	146	15.4418	Point 49	210.372	547.766	-41.099	no cnx
2020_05_26_exp2_TH	1	pyramidal	2	146	15.4418	Point 42	156.129	385.412	-29.339	no cnx
2020_05_26_exp2_TH	1	pyramidal	2	146	15.4418	Point 43	213.244	281.627	-28.709	no cnx
2020_05_26_exp2_TH	1	pyramidal	2	146	15.4418	Point 40	142.417	316.271	-29.339	no cnx
2020_05_26_exp2_TH	1	pyramidal	2	146	15.4418	Point 41	112.752	266.989	-29.339	no cnx
2020_05_26_exp2_TH	1	pyramidal	2	146	15.4418	Point 46	100.906	253.093	-38.199	no cnx
2020_05_26_exp2_TH	1	pyramidal	2	146	15.4418	Point 47	133.186	401.591	-38.199	no cnx
2020_05_26_exp2_TH	1	pyramidal	2	146	15.4418	Point 44	116.162	425.553	-29.339	no cnx
2020_05_26_exp2_TH	1	pyramidal	2	146	15.4418	Point 28	93.5264	110.5	-18.389	no cnx
2020_05_26_exp2_TH	1	pyramidal	2	146	15.4418	Point 29	146.75	28.1241	-18.389	direct
2020_05_26_exp2_TH	1	pyramidal	2	146	15.4418	Point 20	148.183	7.13831	-0.129	direct
2020_05_26_exp2_TH	1	pyramidal	2	146	15.4418	Point 21	120.682	35.1197	-0.129	direct
2020_05_26_exp2_TH	1	pyramidal	2	146	15.4418	Point 22	126.723	190.122	-0.129	excitatory
2020_05_26_exp2_TH	1	pyramidal	2	146	15.4418	Point 23	139.764	92.8434	-0.129	direct
2020_05_26_exp2_TH	1	pyramidal	2	146	15.4418	Point 24	184.265	82.0594	-3.349	excitatory
2020_05_26_exp2_TH	1	pyramidal	2	146	15.4418	Point 25	196.891	96.1518	-6.149	direct
2020_05_26_exp2_TH	1	pyramidal	2	146	15.4418	Point 26	100.21	65.0882	-6.149	no cnx
2020_05_26_exp2_TH	1	pyramidal	2	146	15.4418	Point 27	115.774	191.948	-3.349	no cnx
2020_05_26_exp2_TH	1	pyramidal	2	146	15.4418	Point 39	164.793	214.774	-29.339	no cnx
2020_05_26_exp2_TH	1	pyramidal	2	146	15.4418	Point 33	121.471	104.93	-18.389	no cnx
2020_05_26_exp2_TH	1	pyramidal	2	146	15.4418	Point 38	200.929	226.928	-29.339	no cnx

## Sheet: Fig3B_PenkToL23FSI
exp_id	headstage	post_class	post_layer	postPia	post_z	MP_ID	prePia	x_ap	pre_z	cnx
2020_08_21_exp1_TH	3	interneuron	2	133	67.844	Point 11	224.337	141.728	54.564	no cnx
2020_08_21_exp1_TH	3	interneuron	2	133	67.844	Point 10	184.39	174.056	59.584	no cnx
2020_08_21_exp1_TH	3	interneuron	2	133	67.844	Point 13	191.911	205.225	45.364	no cnx
2020_08_21_exp1_TH	3	interneuron	2	133	67.844	Point 12	311.923	64.3973	54.564	no cnx
2020_08_21_exp1_TH	3	interneuron	2	133	67.844	Point 15	88.7701	143.601	45.364	no cnx
2020_08_21_exp1_TH	3	interneuron	2	133	67.844	Point 14	121.106	156.772	45.364	no cnx
2020_08_21_exp1_TH	3	interneuron	2	133	67.844	Point 17	238.316	93.2248	45.364	no cnx
2020_08_21_exp1_TH	3	interneuron	2	133	67.844	Point 16	169.557	-10.751	43.054	no cnx
2020_08_21_exp1_TH	3	interneuron	2	133	67.844	Point 19	217.888	-37.0548	43.054	no cnx
2020_08_21_exp1_TH	3	interneuron	2	133	67.844	Point 18	156.642	-39.2035	43.054	excitatory
2020_08_21_exp1_TH	3	interneuron	2	133	67.844	Point 31	134.234	202.418	23.344	no cnx
2020_08_21_exp1_TH	3	interneuron	2	133	67.844	Point 30	266.88	113.006	23.344	no cnx
2020_08_21_exp1_TH	3	interneuron	2	133	67.844	Point 37	77.1693	64.6461	15.704	no cnx
2020_08_21_exp1_TH	3	interneuron	2	133	67.844	Point 36	164.553	199.046	15.704	no cnx
2020_08_21_exp1_TH	3	interneuron	2	133	67.844	Point 35	145.868	231.685	15.704	no cnx
2020_08_21_exp1_TH	3	interneuron	2	133	67.844	Point 34	159.628	224.107	23.344	no cnx
2020_08_21_exp1_TH	3	interneuron	2	133	67.844	Point 5	234.271	157.854	68.664	no cnx
2020_08_21_exp1_TH	3	interneuron	2	133	67.844	Point 4	97.3838	133.648	68.664	no cnx
2020_08_21_exp1_TH	3	interneuron	2	133	67.844	Point 7	111.651	69.0382	59.584	no cnx
2020_08_21_exp1_TH	3	interneuron	2	133	67.844	Point 6	144.058	124.961	68.664	no cnx
2020_08_21_exp1_TH	3	interneuron	2	133	67.844	Point 1	140.917	-49.5152	76.574	no cnx
2020_08_21_exp1_TH	3	interneuron	2	133	67.844	Point 3	69.7638	132.321	76.574	no cnx
2020_08_21_exp1_TH	3	interneuron	2	133	67.844	Point 2	297.563	-55.705	76.574	no cnx
2020_08_21_exp1_TH	3	interneuron	2	133	67.844	Point 9	140.577	157.851	59.584	no cnx
2020_08_21_exp1_TH	3	interneuron	2	133	67.844	Point 8	158.68	127.774	59.584	no cnx
2020_08_21_exp1_TH	3	interneuron	2	133	67.844	Point 32	93.2321	197.443	23.344	no cnx
2020_08_21_exp1_TH	3	interneuron	2	133	67.844	Point 48	84.5424	73.1968	47.894	no cnx
2020_08_21_exp1_TH	3	interneuron	2	133	67.844	Point 49	240.627	184.644	47.894	no cnx
2020_08_21_exp1_TH	3	interneuron	2	133	67.844	Point 42	194.363	98.5442	7.464	no cnx
2020_08_21_exp1_TH	3	interneuron	2	133	67.844	Point 43	82.6147	61.9872	7.464	no cnx
2020_08_21_exp1_TH	3	interneuron	2	133	67.844	Point 40	135.904	190.75	7.464	no cnx
2020_08_21_exp1_TH	3	interneuron	2	133	67.844	Point 41	75.4596	124.746	7.464	no cnx
2020_08_21_exp1_TH	3	interneuron	2	133	67.844	Point 46	168.641	115.524	47.894	no cnx
2020_08_21_exp1_TH	3	interneuron	2	133	67.844	Point 47	142.499	134.84	47.894	no cnx
2020_08_21_exp1_TH	3	interneuron	2	133	67.844	Point 44	100.26	76.237	7.464	no cnx
2020_08_21_exp1_TH	3	interneuron	2	133	67.844	Point 45	127.803	174.522	47.894	no cnx
2020_08_21_exp1_TH	3	interneuron	2	133	67.844	Point 28	106.183	123.165	23.344	excitatory
2020_08_21_exp1_TH	3	interneuron	2	133	67.844	Point 29	162.342	149.704	23.344	no cnx
2020_08_21_exp1_TH	3	interneuron	2	133	67.844	Point 20	219.294	-45.5852	43.054	no cnx
2020_08_21_exp1_TH	3	interneuron	2	133	67.844	Point 21	114.658	3.68187	35.484	excitatory
2020_08_21_exp1_TH	3	interneuron	2	133	67.844	Point 22	140.512	21.4324	35.484	excitatory
2020_08_21_exp1_TH	3	interneuron	2	133	67.844	Point 23	190.275	30.0556	35.484	no cnx
2020_08_21_exp1_TH	3	interneuron	2	133	67.844	Point 24	246.849	21.7207	35.484	no cnx
2020_08_21_exp1_TH	3	interneuron	2	133	67.844	Point 25	161.586	20.3934	35.484	excitatory
2020_08_21_exp1_TH	3	interneuron	2	133	67.844	Point 26	115.713	21.1136	35.484	no cnx
2020_08_21_exp1_TH	3	interneuron	2	133	67.844	Point 27	180.684	-8.35097	23.344	excitatory
2020_08_21_exp1_TH	3	interneuron	2	133	67.844	Point 39	200.547	254.848	15.704	no cnx
2020_08_21_exp1_TH	3	interneuron	2	133	67.844	Point 33	274.481	187.104	23.344	no cnx
2020_08_21_exp1_TH	3	interneuron	2	133	67.844	Point 38	102.233	139.919	15.704	no cnx
2020_05_27_exp3_TH	0	interneuron	2	185	63.6512	Point 11	234.15	79.9643	46.841	no cnx
2020_05_27_exp3_TH	0	interneuron	2	185	63.6512	Point 10	176.778	-82.6858	46.841	no cnx
2020_05_27_exp3_TH	0	interneuron	2	185	63.6512	Point 13	195.92	-86.8029	50.661	excitatory
2020_05_27_exp3_TH	0	interneuron	2	185	63.6512	Point 12	268.746	42.2753	50.661	excitatory
2020_05_27_exp3_TH	0	interneuron	2	185	63.6512	Point 15	144.43	56.7296	46.841	no cnx
2020_05_27_exp3_TH	0	interneuron	2	185	63.6512	Point 14	197.383	-141.284	46.841	no cnx
2020_05_27_exp3_TH	0	interneuron	2	185	63.6512	Point 17	236.703	1.01596	41.561	excitatory
2020_05_27_exp3_TH	0	interneuron	2	185	63.6512	Point 16	205.054	-4.13911	41.561	excitatory
2020_05_27_exp3_TH	0	interneuron	2	185	63.6512	Point 19	188.582	126.335	35.851	no cnx
2020_05_27_exp3_TH	0	interneuron	2	185	63.6512	Point 18	178.263	56.807	35.851	no cnx
2020_05_27_exp3_TH	0	interneuron	2	185	63.6512	Point 31	139.453	-83.1682	45.861	no cnx
2020_05_27_exp3_TH	0	interneuron	2	185	63.6512	Point 30	249.982	-124.951	50.701	no cnx
2020_05_27_exp3_TH	0	interneuron	2	185	63.6512	Point 37	190.947	-150.333	45.861	no cnx
2020_05_27_exp3_TH	0	interneuron	2	185	63.6512	Point 36	290.838	-179.299	45.861	no cnx
2020_05_27_exp3_TH	0	interneuron	2	185	63.6512	Point 35	180.022	-134.52	45.861	no cnx
2020_05_27_exp3_TH	0	interneuron	2	185	63.6512	Point 34	182.961	-234.756	45.861	no cnx
2020_05_27_exp3_TH	0	interneuron	2	185	63.6512	Point 5	198.924	-103.631	51.061	excitatory
2020_05_27_exp3_TH	0	interneuron	2	185	63.6512	Point 4	269.327	-97.201	49.671	no cnx
2020_05_27_exp3_TH	0	interneuron	2	185	63.6512	Point 7	177.808	-169.014	49.671	no cnx
2020_05_27_exp3_TH	0	interneuron	2	185	63.6512	Point 6	232.715	-134.324	51.061	excitatory
2020_05_27_exp3_TH	0	interneuron	2	185	63.6512	Point 1	168.776	-43.0204	51.061	no cnx
2020_05_27_exp3_TH	0	interneuron	2	185	63.6512	Point 3	192.155	-77.9339	49.671	no cnx
2020_05_27_exp3_TH	0	interneuron	2	185	63.6512	Point 2	257.852	32.7424	49.671	no cnx
2020_05_27_exp3_TH	0	interneuron	2	185	63.6512	Point 9	205.947	-91.8689	51.061	excitatory
2020_05_27_exp3_TH	0	interneuron	2	185	63.6512	Point 8	334.649	-125.042	51.061	no cnx
2020_05_27_exp3_TH	0	interneuron	2	185	63.6512	Point 32	223.504	-2.17299	45.861	excitatory
2020_05_27_exp3_TH	0	interneuron	2	185	63.6512	Point 28	318.642	-164.134	50.701	no cnx
2020_05_27_exp3_TH	0	interneuron	2	185	63.6512	Point 29	324.288	-83.9697	50.701	no cnx
2020_05_27_exp3_TH	0	interneuron	2	185	63.6512	Point 20	249.83	203.312	35.851	no cnx
2020_05_27_exp3_TH	0	interneuron	2	185	63.6512	Point 21	190.869	55.7529	35.851	no cnx
2020_05_27_exp3_TH	0	interneuron	2	185	63.6512	Point 22	246.889	140.5	35.851	no cnx
2020_05_27_exp3_TH	0	interneuron	2	185	63.6512	Point 23	203.499	119.527	41.561	excitatory
2020_05_27_exp3_TH	0	interneuron	2	185	63.6512	Point 24	138.814	-249.502	50.701	no cnx
2020_05_27_exp3_TH	0	interneuron	2	185	63.6512	Point 25	181.389	-151.047	50.701	no cnx
2020_05_27_exp3_TH	0	interneuron	2	185	63.6512	Point 26	177.851	-229.05	50.701	no cnx
2020_05_27_exp3_TH	0	interneuron	2	185	63.6512	Point 27	213.161	-271.666	50.701	no cnx
2020_05_27_exp3_TH	0	interneuron	2	185	63.6512	Point 33	196.785	-169.475	45.861	no cnx
2020_05_26_exp2_TH	3	interneuron	2	171	0.950862	Point 51	176.285	204.147	-41.099	no cnx
2020_05_26_exp2_TH	3	interneuron	2	171	0.950862	Point 50	122.1	179.088	-41.099	no cnx
2020_05_26_exp2_TH	3	interneuron	2	171	0.950862	Point 11	171.029	-203.101	8.881	no cnx
2020_05_26_exp2_TH	3	interneuron	2	171	0.950862	Point 13	160.193	-85.2786	8.881	no cnx
2020_05_26_exp2_TH	3	interneuron	2	171	0.950862	Point 12	141.083	-249.456	8.881	no cnx
2020_05_26_exp2_TH	3	interneuron	2	171	0.950862	Point 15	149.117	-23.9712	8.881	no cnx
2020_05_26_exp2_TH	3	interneuron	2	171	0.950862	Point 14	319.695	-75.4335	8.881	no cnx
2020_05_26_exp2_TH	3	interneuron	2	171	0.950862	Point 17	305.336	57.3837	-0.129	no cnx
2020_05_26_exp2_TH	3	interneuron	2	171	0.950862	Point 16	310.899	-31.6852	8.881	no cnx
2020_05_26_exp2_TH	3	interneuron	2	171	0.950862	Point 19	160.822	-124.82	-0.129	excitatory
2020_05_26_exp2_TH	3	interneuron	2	171	0.950862	Point 18	201.038	-94.7652	-0.129	no cnx
2020_05_26_exp2_TH	3	interneuron	2	171	0.950862	Point 31	256.386	-58.3907	-18.389	no cnx
2020_05_26_exp2_TH	3	interneuron	2	171	0.950862	Point 30	122.906	-99.6393	-18.389	no cnx
2020_05_26_exp2_TH	3	interneuron	2	171	0.950862	Point 37	108.619	-49.1586	-29.339	no cnx
2020_05_26_exp2_TH	3	interneuron	2	171	0.950862	Point 35	137.916	-14.361	-18.389	excitatory
2020_05_26_exp2_TH	3	interneuron	2	171	0.950862	Point 34	109.976	-22.1314	-18.389	excitatory
2020_05_26_exp2_TH	3	interneuron	2	171	0.950862	Point 32	122.372	16.5746	-18.389	excitatory
2020_05_26_exp2_TH	3	interneuron	2	171	0.950862	Point 48	163.05	224.09	-41.099	no cnx
2020_05_26_exp2_TH	3	interneuron	2	171	0.950862	Point 49	217.981	327.741	-41.099	no cnx
2020_05_26_exp2_TH	3	interneuron	2	171	0.950862	Point 42	163.738	165.387	-29.339	no cnx
2020_05_26_exp2_TH	3	interneuron	2	171	0.950862	Point 43	220.853	61.6017	-28.709	excitatory
2020_05_26_exp2_TH	3	interneuron	2	171	0.950862	Point 40	150.026	96.2456	-29.339	no cnx
2020_05_26_exp2_TH	3	interneuron	2	171	0.950862	Point 41	120.361	46.9644	-29.339	no cnx
2020_05_26_exp2_TH	3	interneuron	2	171	0.950862	Point 46	108.515	33.0682	-38.199	excitatory
2020_05_26_exp2_TH	3	interneuron	2	171	0.950862	Point 47	140.795	181.566	-38.199	excitatory
2020_05_26_exp2_TH	3	interneuron	2	171	0.950862	Point 44	123.771	205.528	-29.339	no cnx
2020_05_26_exp2_TH	3	interneuron	2	171	0.950862	Point 28	101.135	-109.525	-18.389	excitatory
2020_05_26_exp2_TH	3	interneuron	2	171	0.950862	Point 29	154.359	-191.901	-18.389	excitatory
2020_05_26_exp2_TH	3	interneuron	2	171	0.950862	Point 20	155.792	-212.887	-0.129	no cnx
2020_05_26_exp2_TH	3	interneuron	2	171	0.950862	Point 21	128.291	-184.905	-0.129	no cnx
2020_05_26_exp2_TH	3	interneuron	2	171	0.950862	Point 22	134.332	-29.9025	-0.129	excitatory
2020_05_26_exp2_TH	3	interneuron	2	171	0.950862	Point 23	147.373	-127.182	-0.129	no cnx
2020_05_26_exp2_TH	3	interneuron	2	171	0.950862	Point 24	191.874	-137.966	-3.349	no cnx
2020_05_26_exp2_TH	3	interneuron	2	171	0.950862	Point 25	204.5	-123.873	-6.149	no cnx
2020_05_26_exp2_TH	3	interneuron	2	171	0.950862	Point 26	107.819	-154.937	-6.149	no cnx
2020_05_26_exp2_TH	3	interneuron	2	171	0.950862	Point 27	123.383	-28.0771	-3.349	excitatory
2020_05_26_exp2_TH	3	interneuron	2	171	0.950862	Point 39	172.402	-5.25108	-29.339	excitatory
2020_05_26_exp2_TH	3	interneuron	2	171	0.950862	Point 33	129.08	-115.095	-18.389	excitatory
2020_05_26_exp2_TH	3	interneuron	2	171	0.950862	Point 38	208.538	6.903	-29.339	no cnx

## Sheet: Fig3B_PenkToL23VIP
exp_id	headstage	post_class	post_layer	postPia	post_z	MP_ID	prePia	x_ap	pre_z	cnx
2020_11_12_exp2_TH	3	interneuron	2	194	261.034	Point 11	152.813	-26.3982	251.254	no cnx
2020_11_12_exp2_TH	3	interneuron	2	194	261.034	Point 10	150.511	-38.8759	251.254	excitatory
2020_11_12_exp2_TH	3	interneuron	2	194	261.034	Point 13	119.229	15.1086	240.424	excitatory
2020_11_12_exp2_TH	3	interneuron	2	194	261.034	Point 12	142.516	19.5911	240.424	excitatory
2020_11_12_exp2_TH	3	interneuron	2	194	261.034	Point 15	103.707	64.559	248.474	no cnx
2020_11_12_exp2_TH	3	interneuron	2	194	261.034	Point 14	150.018	-25.2341	237.864	excitatory
2020_11_12_exp2_TH	3	interneuron	2	194	261.034	Point 17	174.664	121.548	248.474	no cnx
2020_11_12_exp2_TH	3	interneuron	2	194	261.034	Point 16	92.4552	105.438	248.474	no cnx
2020_11_12_exp2_TH	3	interneuron	2	194	261.034	Point 19	227.99	45.2136	266.494	no cnx
2020_11_12_exp2_TH	3	interneuron	2	194	261.034	Point 18	142.867	139.015	248.474	no cnx
2020_11_12_exp2_TH	3	interneuron	2	194	261.034	Point 31	161.261	-5.09536	308.944	no cnx
2020_11_12_exp2_TH	3	interneuron	2	194	261.034	Point 30	204.94	31.2857	292.384	excitatory
2020_11_12_exp2_TH	3	interneuron	2	194	261.034	Point 37	184.248	-254.022	253.714	no cnx
2020_11_12_exp2_TH	3	interneuron	2	194	261.034	Point 36	176.15	-221.217	253.714	no cnx
2020_11_12_exp2_TH	3	interneuron	2	194	261.034	Point 35	164.426	-257.824	253.714	no cnx
2020_11_12_exp2_TH	3	interneuron	2	194	261.034	Point 34	215.381	-264.527	253.714	no cnx
2020_11_12_exp2_TH	3	interneuron	2	194	261.034	Point 5	216.454	-97.4567	255.574	no cnx
2020_11_12_exp2_TH	3	interneuron	2	194	261.034	Point 4	128.464	9.96974	255.574	no cnx
2020_11_12_exp2_TH	3	interneuron	2	194	261.034	Point 7	242.634	-31.1795	255.574	no cnx
2020_11_12_exp2_TH	3	interneuron	2	194	261.034	Point 6	236.408	-49.6173	255.574	no cnx
2020_11_12_exp2_TH	3	interneuron	2	194	261.034	Point 1	161.801	-61.3502	263.364	no cnx
2020_11_12_exp2_TH	3	interneuron	2	194	261.034	Point 3	164.223	-184.679	255.574	no cnx
2020_11_12_exp2_TH	3	interneuron	2	194	261.034	Point 2	124.163	-179.311	263.364	no cnx
2020_11_12_exp2_TH	3	interneuron	2	194	261.034	Point 9	177.592	-179.252	251.254	no cnx
2020_11_12_exp2_TH	3	interneuron	2	194	261.034	Point 8	106.124	-121.154	251.254	no cnx
2020_11_12_exp2_TH	3	interneuron	2	194	261.034	Point 32	254.24	51.3681	308.944	no cnx
2020_11_12_exp2_TH	3	interneuron	2	194	261.034	Point 28	192.422	7.54103	292.384	no cnx
2020_11_12_exp2_TH	3	interneuron	2	194	261.034	Point 29	229.286	4.7775	292.384	excitatory
2020_11_12_exp2_TH	3	interneuron	2	194	261.034	Point 20	239.375	108.425	266.494	no cnx
2020_11_12_exp2_TH	3	interneuron	2	194	261.034	Point 21	157.16	237.21	266.494	no cnx
2020_11_12_exp2_TH	3	interneuron	2	194	261.034	Point 22	182.581	87.7814	273.794	no cnx
2020_11_12_exp2_TH	3	interneuron	2	194	261.034	Point 23	108.313	151.775	273.794	no cnx
2020_11_12_exp2_TH	3	interneuron	2	194	261.034	Point 24	206.881	207.859	273.794	no cnx
2020_11_12_exp2_TH	3	interneuron	2	194	261.034	Point 25	171.512	-5.32321	281.114	no cnx
2020_11_12_exp2_TH	3	interneuron	2	194	261.034	Point 26	144.899	-24.3885	281.114	no cnx
2020_11_12_exp2_TH	3	interneuron	2	194	261.034	Point 27	217.459	92.6278	281.114	no cnx
2020_11_12_exp2_TH	3	interneuron	2	194	261.034	Point 39	123.889	-191.131	236.944	no cnx
2020_11_12_exp2_TH	3	interneuron	2	194	261.034	Point 33	254.975	-33.0636	308.944	no cnx
2020_11_12_exp2_TH	3	interneuron	2	194	261.034	Point 38	171.787	-268.884	236.944	no cnx
2020_11_12_exp1_TH	0	interneuron	2	149	387.644	Point 4	161.892	96.9948	373.034	no cnx
2020_11_12_exp1_TH	0	interneuron	2	149	387.644	Point 1	52.3151	-3.43356	373.034	no cnx
2020_11_12_exp1_TH	0	interneuron	2	149	387.644	Point 3	237.013	37.7153	373.034	excitatory
2020_11_12_exp1_TH	0	interneuron	2	149	387.644	Point 2	163.727	9.97965	373.034	no cnx

## Sheet: Fig3C_2P_paired_exc_comp
Fig3C_L23exc_L23exc_bins	0	100	200	300	400	500
Fig3C_L23exc_L23exc_paired_probed	135	48	0	2	0
Fig3C_L23exc_L23exc_paired_cnx	8	2	0	0	0
Fig3C_L23exc_L23exc_paired_fraction	0.0592593	0.0416667
Fig3C_L23exc_L23exc_paired_CI_low	0.0284115	0.00875828
Fig3C_L23exc_L23exc_paired_CI_high	0.108692	0.12701
Fig3C_L23exc_L23exc_2P_probed	205	312	175	103	56
Fig3C_L23exc_L23exc_2P_cnx	12	3	1	0	0
Fig3C_L23exc_L23exc_2P_fraction	0.0585366	0.00961538	0.00571429	0	0
Fig3C_L23exc_L23exc_2P_CI_low	0.0323944	0.00271534	0.000617251	4.75576e-06	8.72938e-06
Fig3C_L23exc_L23exc_2P_CI_high	0.0970069	0.025436	0.0263935	0.024035	0.0436732
Fig3C_L23exc_L23fsi_bins	0	100	200	300	400	500
Fig3C_L23exc_L23fsi_paired_probed	28	27	3	0	0
Fig3C_L23exc_L23fsi_paired_cnx	13	8	0	0	0
Fig3C_L23exc_L23fsi_paired_fraction	0.464286	0.296296	0
Fig3C_L23exc_L23fsi_paired_CI_low	0.290681	0.151206	0.000150636
Fig3C_L23exc_L23fsi_paired_CI_high	0.644862	0.482485	0.535583
Fig3C_L23exc_L23fsi_2P_probed	41	60	23	1	0
Fig3C_L23exc_L23fsi_2P_cnx	19	9	0	0	0
Fig3C_L23exc_L23fsi_2P_fraction	0.463415	0.15	0
Fig3C_L23exc_L23fsi_2P_CI_low	0.317626	0.0768981	2.11183e-05
Fig3C_L23exc_L23fsi_2P_CI_high	0.61417	0.255876	0.102394
Fig3C_L23exc_L23vip_bins	0	100	200	300	400	500
Fig3C_L23exc_L23vip_paired_probed	25	28	4	0	0
Fig3C_L23exc_L23vip_paired_cnx	6	4	0	0	0
Fig3C_L23exc_L23vip_paired_fraction	0.24	0.142857	0
Fig3C_L23exc_L23vip_paired_CI_low	0.106923	0.0502066	0.000115333
Fig3C_L23exc_L23vip_paired_CI_high	0.429386	0.304758	0.444763
Fig3C_L23exc_L23vip_2P_probed	24	11	8	0	0
Fig3C_L23exc_L23vip_2P_cnx	7	0	0	0	0
Fig3C_L23exc_L23vip_2P_fraction	0.291667	0	0
Fig3C_L23exc_L23vip_2P_CI_low	0.141025	4.36358e-05	5.94903e-05
Fig3C_L23exc_L23vip_2P_CI_high	0.489236	0.199995	0.262217

## Sheet: Fig3_suppl3_2P_paired_inh_comp
Fig3_fs3_L23Sst_L23exc_bins	0	100	200	300	400	500
Fig3_fs3_L23Sst_L23exc_paired_probed	38	22	1	2	0
Fig3_fs3_L23Sst_L23exc_paired_cnx	9	6	0	0	0
Fig3_fs3_L23Sst_L23exc_paired_fraction	0.236842	0.272727
Fig3_fs3_L23Sst_L23exc_paired_CI_low	0.124156	0.122705
Fig3_fs3_L23Sst_L23exc_paired_CI_high	0.387883	0.478231
Fig3_fs3_L23Sst_L23exc_2P_probed	102	167	63	40	18
Fig3_fs3_L23Sst_L23exc_2P_cnx	45	39	4	0	0
Fig3_fs3_L23Sst_L23exc_2P_fraction	0.441176	0.233533	0.0634921	0	0
Fig3_fs3_L23Sst_L23exc_2P_CI_low	0.347582	0.174301	0.0218085	1.21993e-05	2.69031e-05
Fig3_fs3_L23Sst_L23exc_2P_CI_high	0.538057	0.301908	0.143909	0.060498	0.128558
Fig3_fs3_L23SstAi167_L23exc_bins	0	100	200	300	400	500
Fig3_fs3_L23SstAi167_L23exc_paired_probed	38	22	1	2	0
Fig3_fs3_L23SstAi167_L23exc_paired_cnx	9	6	0	0	0
Fig3_fs3_L23SstAi167_L23exc_paired_fraction	0.236842	0.272727
Fig3_fs3_L23SstAi167_L23exc_paired_CI_low	0.124156	0.122705
Fig3_fs3_L23SstAi167_L23exc_paired_CI_high	0.387883	0.478231
Fig3_fs3_L23SstAi167_L23exc_2P_probed	38	31	16	8	4
Fig3_fs3_L23SstAi167_L23exc_2P_cnx	20	7	0	0	0
Fig3_fs3_L23SstAi167_L23exc_2P_fraction	0.526316	0.225806	0	0
Fig3_fs3_L23SstAi167_L23exc_2P_CI_low	0.370535	0.107114	3.02135e-05	5.94903e-05
Fig3_fs3_L23SstAi167_L23exc_2P_CI_high	0.678254	0.39299	0.143184	0.262217
Fig3_fs3_L23SstAAV_L23exc_bins	0	100	200	300	400	500
Fig3_fs3_L23SstAAV_L23exc_paired_probed	38	22	1	2	0
Fig3_fs3_L23SstAAV_L23exc_paired_cnx	9	6	0	0	0
Fig3_fs3_L23SstAAV_L23exc_paired_fraction	0.236842	0.272727
Fig3_fs3_L23SstAAV_L23exc_paired_CI_low	0.124156	0.122705
Fig3_fs3_L23SstAAV_L23exc_paired_CI_high	0.387883	0.478231
Fig3_fs3_L23SstAAV_L23exc_2P_probed	64	136	47	32	14
Fig3_fs3_L23SstAAV_L23exc_2P_cnx	25	32	4	0	0
Fig3_fs3_L23SstAAV_L23exc_2P_fraction	0.390625	0.235294	0.0851064	0	0
Fig3_fs3_L23SstAAV_L23exc_2P_CI_low	0.278076	0.170065	0.0294119	1.52253e-05	3.44527e-05
Fig3_fs3_L23SstAAV_L23exc_2P_CI_high	0.51282	0.311651	0.189757	0.0749278	0.161553
Fig3_fs3_L23Sst_L23fsi_bins	0	100	200	300	400	500
Fig3_fs3_L23Sst_L23fsi_paired_probed	36	35	9	0	0
Fig3_fs3_L23Sst_L23fsi_paired_cnx	8	4	0	0	0
Fig3_fs3_L23Sst_L23fsi_paired_fraction	0.222222	0.114286	0
Fig3_fs3_L23Sst_L23fsi_paired_CI_low	0.111078	0.0398292	5.30641e-05
Fig3_fs3_L23Sst_L23fsi_paired_CI_high	0.375983	0.249207	0.23761
Fig3_fs3_L23Sst_L23fsi_2P_probed	12	26	8	2	2
Fig3_fs3_L23Sst_L23fsi_2P_cnx	2	4	0	0	0
Fig3_fs3_L23Sst_L23fsi_2P_fraction	0.166667	0.153846	0
Fig3_fs3_L23Sst_L23fsi_2P_CI_low	0.0363378	0.0542462	5.94903e-05
Fig3_fs3_L23Sst_L23fsi_2P_CI_high	0.436248	0.325437	0.262217
Fig3_fs3_L23Pvalb_L23exc_bins	0	100	200	300	400	500
Fig3_fs3_L23Pvalb_L23exc_paired_probed	31	30	4	0	0
Fig3_fs3_L23Pvalb_L23exc_paired_cnx	17	9	0	0	0
Fig3_fs3_L23Pvalb_L23exc_paired_fraction	0.548387	0.3
Fig3_fs3_L23Pvalb_L23exc_paired_CI_low	0.375465	0.159993
Fig3_fs3_L23Pvalb_L23exc_paired_CI_high	0.71273	0.476544
Fig3_fs3_L23Pvalb_L23exc_2P_probed	50	95	40	18	7
Fig3_fs3_L23Pvalb_L23exc_2P_cnx	17	17	3	1	0
Fig3_fs3_L23Pvalb_L23exc_2P_fraction	0.34	0.178947	0.075	0.0555556	0
Fig3_fs3_L23Pvalb_L23exc_2P_CI_low	0.220575	0.112076	0.0215767	0.00606134	6.76865e-05
Fig3_fs3_L23Pvalb_L23exc_2P_CI_high	0.477354	0.265026	0.186814	0.231612	0.292436
Fig3_fs3_L23Pvalb_L23Pvalb_bins	0	100	200	300	400	500
Fig3_fs3_L23Pvalb_L23Pvalb_paired_probed	82	102	9	2	0
Fig3_fs3_L23Pvalb_L23Pvalb_paired_cnx	30	32	0	0	0
Fig3_fs3_L23Pvalb_L23Pvalb_paired_fraction	0.365854	0.313725	0
Fig3_fs3_L23Pvalb_L23Pvalb_paired_CI_low	0.267696	0.229844	5.30641e-05
Fig3_fs3_L23Pvalb_L23Pvalb_paired_CI_high	0.473295	0.40801	0.23761
Fig3_fs3_L23Pvalb_L23Pvalb_2P_probed	16	35	14	4	3
Fig3_fs3_L23Pvalb_L23Pvalb_2P_cnx	5	14	3	0	0
Fig3_fs3_L23Pvalb_L23Pvalb_2P_fraction	0.3125	0.4	0.214286
Fig3_fs3_L23Pvalb_L23Pvalb_2P_CI_low	0.130582	0.250901	0.0643351
Fig3_fs3_L23Pvalb_L23Pvalb_2P_CI_high	0.555704	0.564892	0.469024

## Sheet: Fig3D_connectivity_comp
connection class	intersomatic distance (μm)	paired connections tested	paired connections found	2P opto connections tested	2P opto connections found	paired fraction connected	2P opto fraction connected	Fisher's Exact p-value	Benjamini/Hochberg p-value
L2/3 excitatory to L2/3 excitatory	0-100	135	8	205	12	0.0592593	0.0585366	1	1
	100-200	48	2	312	3	0.0416667	0.00961539	0.133801	0.508867
L2/3 excitatory to L2/3 Pvalb	0-100	28	13	41	19	0.464286	0.463415	1	1
	100-200	27	8	60	9	0.296296	0.15	0.145391	0.508867
L2/3 excitatory to L2/3 VIP	0-100	25	6	24	7	0.24	0.291667	0.753614	1
	100-200	28	4	11	0	0.142857	0	0.309115	0.721268
L2/3 Sst to L2/3 excitatory	0-100	38	9	101	45	0.236842	0.445545	0.0314577	0.440408
	100-200	22	6	167	38	0.272727	0.227545	0.600734	1
L2/3 Sst to L2/3 Pvalb	0-100	36	8	12	2	0.222222	0.166667	1	1
	100-200	35	4	26	4	0.114286	0.153846	0.713381	1
L2/3 Pvalb to L2/3 excitatory	0-100	31	17	50	17	0.548387	0.34	0.104213	0.508867
	100-200	30	9	96	18	0.3	0.1875	0.208089	0.582649
L2/3 Pvalb to L2/3 Pvalb	0-100	82	30	17	6	0.365854	0.352941	1	1
	100-200	102	32	35	14	0.313725	0.4	0.408287	0.816575
