# Supplementary material for: Synaptic connectivity to L2/3 of primary visual cortex measured by two-photon optogenetic stimulation
Source: eLife. 2022 Jan 21;11:e71103. doi: 10.7554/eLife.71103 (PMC8824465; doi:10.7554/eLife.71103)
Supplement: Figure 4—source data 1. [file elife-71103-fig4-data1.xlsx]

## Sheet: Fig4B_RorbKv_L23pyr
exp_id	headstage	post_class	post_layer	postPia	post_z	MP_ID	prePia	x_ap	pre_z	cnx
2020_07_03_exp3_TH	1	pyramidal	2	220	242.974	Point 11	365.508	179.941	268.554	no cnx
2020_07_03_exp3_TH	1	pyramidal	2	220	242.974	Point 10	339.62	137.405	268.554	no cnx
2020_07_03_exp3_TH	1	pyramidal	2	220	242.974	Point 13	367.745	94.8584	268.554	no cnx
2020_07_03_exp3_TH	1	pyramidal	2	220	242.974	Point 12	374.627	40.9906	268.554	no cnx
2020_07_03_exp3_TH	1	pyramidal	2	220	242.974	Point 15	287.026	-7.20419	268.554	no cnx
2020_07_03_exp3_TH	1	pyramidal	2	220	242.974	Point 14	298.716	43.9864	268.554	no cnx
2020_07_03_exp3_TH	1	pyramidal	2	220	242.974	Point 17	404.018	34.6233	268.554	no cnx
2020_07_03_exp3_TH	1	pyramidal	2	220	242.974	Point 16	303.469	22.1381	268.554	no cnx
2020_07_03_exp3_TH	1	pyramidal	2	220	242.974	Point 19	327.655	-17.0761	268.554	no cnx
2020_07_03_exp3_TH	1	pyramidal	2	220	242.974	Point 18	304.916	0.528655	268.554	excitatory
2020_07_03_exp3_TH	1	pyramidal	2	220	242.974	Point 5	325.035	129.281	287.084	no cnx
2020_07_03_exp3_TH	1	pyramidal	2	220	242.974	Point 4	362.448	145.858	287.084	no cnx
2020_07_03_exp3_TH	1	pyramidal	2	220	242.974	Point 7	307.917	35.252	268.554	no cnx
2020_07_03_exp3_TH	1	pyramidal	2	220	242.974	Point 6	321.61	94.6436	287.084	no cnx
2020_07_03_exp3_TH	1	pyramidal	2	220	242.974	Point 1	315.337	72.9485	287.084	no cnx
2020_07_03_exp3_TH	1	pyramidal	2	220	242.974	Point 3	319.053	31.4714	287.084	no cnx
2020_07_03_exp3_TH	1	pyramidal	2	220	242.974	Point 2	340.983	127.584	287.084	no cnx
2020_07_03_exp3_TH	1	pyramidal	2	220	242.974	Point 9	339.374	98.7685	268.554	no cnx
2020_07_03_exp3_TH	1	pyramidal	2	220	242.974	Point 8	314.088	57.0404	268.554	no cnx
2020_07_03_exp3_TH	1	pyramidal	2	220	242.974	Point 20	374.965	-48.9157	268.554	no cnx
2020_07_03_exp3_TH	1	pyramidal	2	220	242.974	Point 21	315.635	-2.26818	280.054	excitatory
2020_07_03_exp3_TH	1	pyramidal	2	220	242.974	Point 22	326.27	-11.9447	276.964	no cnx
2020_05_28_exp1_TH	1	pyramidal	2	154	118.784	Point 11	296.366	50.7172	163.254	no cnx
2020_05_28_exp1_TH	1	pyramidal	2	154	118.784	Point 10	456.071	124.773	163.254	no cnx
2020_05_28_exp1_TH	1	pyramidal	2	154	118.784	Point 13	383.959	-20.2351	161.474	excitatory
2020_05_28_exp1_TH	1	pyramidal	2	154	118.784	Point 12	369.53	17.5138	155.624	excitatory
2020_05_28_exp1_TH	1	pyramidal	2	154	118.784	Point 15	384.62	50.0824	155.624	no cnx
2020_05_28_exp1_TH	1	pyramidal	2	154	118.784	Point 14	418.811	12.0325	155.624	inhibitory
2020_05_28_exp1_TH	1	pyramidal	2	154	118.784	Point 17	379.763	-52.5873	161.474	no cnx
2020_05_28_exp1_TH	1	pyramidal	2	154	118.784	Point 16	332.731	35.22	155.624	no cnx
2020_05_28_exp1_TH	1	pyramidal	2	154	118.784	Point 19	540.722	53.0472	161.484	no cnx
2020_05_28_exp1_TH	1	pyramidal	2	154	118.784	Point 18	569.313	25.6991	161.484	no cnx
2020_05_28_exp1_TH	1	pyramidal	2	154	118.784	Point 31	455.015	-29.6016	160.534	no cnx
2020_05_28_exp1_TH	1	pyramidal	2	154	118.784	Point 30	409.025	-30.7696	160.534	no cnx
2020_05_28_exp1_TH	1	pyramidal	2	154	118.784	Point 37	426.748	-104.471	150.864	no cnx
2020_05_28_exp1_TH	1	pyramidal	2	154	118.784	Point 36	510.86	-20.0335	150.864	no cnx
2020_05_28_exp1_TH	1	pyramidal	2	154	118.784	Point 35	458.44	-6.31722	150.864	excitatory
2020_05_28_exp1_TH	1	pyramidal	2	154	118.784	Point 34	446.228	-134.027	160.534	no cnx
2020_05_28_exp1_TH	1	pyramidal	2	154	118.784	Point 5	373.062	53.2986	147.044	no cnx
2020_05_28_exp1_TH	1	pyramidal	2	154	118.784	Point 4	351.11	-69.172	147.044	no cnx
2020_05_28_exp1_TH	1	pyramidal	2	154	118.784	Point 7	339.759	7.36594	163.244	no cnx
2020_05_28_exp1_TH	1	pyramidal	2	154	118.784	Point 6	352.957	-117.207	147.044	no cnx
2020_05_28_exp1_TH	1	pyramidal	2	154	118.784	Point 1	277.146	69.2227	147.044	no cnx
2020_05_28_exp1_TH	1	pyramidal	2	154	118.784	Point 3	349.415	-84.7387	147.044	no cnx
2020_05_28_exp1_TH	1	pyramidal	2	154	118.784	Point 2	279.727	-72.7333	147.044	no cnx
2020_05_28_exp1_TH	1	pyramidal	2	154	118.784	Point 9	361.142	126.364	163.254	no cnx
2020_05_28_exp1_TH	1	pyramidal	2	154	118.784	Point 8	381.162	19.0066	163.244	excitatory
2020_05_28_exp1_TH	1	pyramidal	2	154	118.784	Point 32	446.486	7.38353	160.534	excitatory
2020_05_28_exp1_TH	1	pyramidal	2	154	118.784	Point 40	462.441	3.77506	130.494	no cnx
2020_05_28_exp1_TH	1	pyramidal	2	154	118.784	Point 41	445.167	-18.2365	130.534	excitatory
2020_05_28_exp1_TH	1	pyramidal	2	154	118.784	Point 28	485.743	-69.3768	152.974	no cnx
2020_05_28_exp1_TH	1	pyramidal	2	154	118.784	Point 29	400.205	-69.7272	160.534	no cnx
2020_05_28_exp1_TH	1	pyramidal	2	154	118.784	Point 20	563.613	-7.01635	161.484	no cnx
2020_05_28_exp1_TH	1	pyramidal	2	154	118.784	Point 21	522.414	-60.909	161.484	no cnx
2020_05_28_exp1_TH	1	pyramidal	2	154	118.784	Point 22	529.34	-7.83158	152.964	no cnx
2020_05_28_exp1_TH	1	pyramidal	2	154	118.784	Point 23	597.701	-42.5784	152.974	no cnx
2020_05_28_exp1_TH	1	pyramidal	2	154	118.784	Point 24	441.882	35.5402	152.974	no cnx
2020_05_28_exp1_TH	1	pyramidal	2	154	118.784	Point 25	484.405	39.1724	152.974	no cnx
2020_05_28_exp1_TH	1	pyramidal	2	154	118.784	Point 26	587.309	129.732	152.974	no cnx
2020_05_28_exp1_TH	1	pyramidal	2	154	118.784	Point 27	571.591	-53.2827	152.974	no cnx
2020_05_28_exp1_TH	1	pyramidal	2	154	118.784	Point 39	420.937	-158.711	150.864	no cnx
2020_05_28_exp1_TH	1	pyramidal	2	154	118.784	Point 33	444.855	-4.07411	160.534	no cnx
2020_05_28_exp1_TH	1	pyramidal	2	154	118.784	Point 38	417.269	-117.366	150.864	no cnx
2019_07_09_exp2_TH	3	pyramidal	2	244	341.764	Point 11	515.923	-163.928	374.454	no cnx
2019_07_09_exp2_TH	3	pyramidal	2	244	341.764	Point 10	466.87	-72.6735	374.384	no cnx
2019_07_09_exp2_TH	3	pyramidal	2	244	341.764	Point 13	354.282	28.7008	374.454	no cnx
2019_07_09_exp2_TH	3	pyramidal	2	244	341.764	Point 12	489.725	-113.202	374.454	no cnx
2019_07_09_exp2_TH	3	pyramidal	2	244	341.764	Point 15	439.744	20.887	374.454	excitatory
2019_07_09_exp2_TH	3	pyramidal	2	244	341.764	Point 14	468.719	93.0774	374.454	no cnx
2019_07_09_exp2_TH	3	pyramidal	2	244	341.764	Point 17	529.894	23.3385	374.454	no cnx
2019_07_09_exp2_TH	3	pyramidal	2	244	341.764	Point 16	424.282	-41.9054	374.454	no cnx
2019_07_09_exp2_TH	3	pyramidal	2	244	341.764	Point 19	563.185	-116.731	374.454	no cnx
2019_07_09_exp2_TH	3	pyramidal	2	244	341.764	Point 18	505.808	-84.1461	374.454	no cnx
2019_07_09_exp2_TH	3	pyramidal	2	244	341.764	Point 31	394.586	68.08	372.714	no cnx
2019_07_09_exp2_TH	3	pyramidal	2	244	341.764	Point 30	341.083	55.4927	372.704	no cnx
2019_07_09_exp2_TH	3	pyramidal	2	244	341.764	Point 37	492.024	22.0946	372.714	no cnx
2019_07_09_exp2_TH	3	pyramidal	2	244	341.764	Point 36	421.797	19.9197	372.714	no cnx
2019_07_09_exp2_TH	3	pyramidal	2	244	341.764	Point 35	345.565	-56.1401	372.714	no cnx
2019_07_09_exp2_TH	3	pyramidal	2	244	341.764	Point 34	443.018	93.8414	372.714	excitatory
2019_07_09_exp2_TH	3	pyramidal	2	244	341.764	Point 5	504.503	73.1709	374.384	no cnx
2019_07_09_exp2_TH	3	pyramidal	2	244	341.764	Point 4	455.878	-118.723	374.384	no cnx
2019_07_09_exp2_TH	3	pyramidal	2	244	341.764	Point 7	350.54	0.445952	374.384	no cnx
2019_07_09_exp2_TH	3	pyramidal	2	244	341.764	Point 6	447.097	44.9756	374.384	no cnx
2019_07_09_exp2_TH	3	pyramidal	2	244	341.764	Point 1	503.235	-136.993	374.384	excitatory
2019_07_09_exp2_TH	3	pyramidal	2	244	341.764	Point 3	479.436	40.2476	374.384	excitatory
2019_07_09_exp2_TH	3	pyramidal	2	244	341.764	Point 2	500.012	-70.1045	374.384	no cnx
2019_07_09_exp2_TH	3	pyramidal	2	244	341.764	Point 9	330.136	-55.1565	374.384	no cnx
2019_07_09_exp2_TH	3	pyramidal	2	244	341.764	Point 8	500.185	135.54	374.384	no cnx
2019_07_09_exp2_TH	3	pyramidal	2	244	341.764	Point 32	343.531	-71.3833	372.714	no cnx
2019_07_09_exp2_TH	3	pyramidal	2	244	341.764	Point 42	413.365	275.406	381.904	no cnx
2019_07_09_exp2_TH	3	pyramidal	2	244	341.764	Point 43	447.111	146.207	381.904	no cnx
2019_07_09_exp2_TH	3	pyramidal	2	244	341.764	Point 40	447.273	285.312	381.904	no cnx
2019_07_09_exp2_TH	3	pyramidal	2	244	341.764	Point 41	377.459	193.544	381.904	excitatory
2019_07_09_exp2_TH	3	pyramidal	2	244	341.764	Point 46	456.618	112.595	381.904	no cnx
2019_07_09_exp2_TH	3	pyramidal	2	244	341.764	Point 44	368.962	29.4748	381.904	no cnx
2019_07_09_exp2_TH	3	pyramidal	2	244	341.764	Point 45	381.61	313.232	381.904	no cnx
2019_07_09_exp2_TH	3	pyramidal	2	244	341.764	Point 28	478.19	-56.7856	372.704	no cnx
2019_07_09_exp2_TH	3	pyramidal	2	244	341.764	Point 29	391.825	-88.773	372.704	no cnx
2019_07_09_exp2_TH	3	pyramidal	2	244	341.764	Point 20	478.935	-23.0739	374.454	no cnx
2019_07_09_exp2_TH	3	pyramidal	2	244	341.764	Point 22	359.996	-100.594	372.704	excitatory
2019_07_09_exp2_TH	3	pyramidal	2	244	341.764	Point 23	496.829	-15.0989	372.704	no cnx
2019_07_09_exp2_TH	3	pyramidal	2	244	341.764	Point 24	360.452	-48.2455	372.714	no cnx
2019_07_09_exp2_TH	3	pyramidal	2	244	341.764	Point 25	297.545	120.234	372.704	no cnx
2019_07_09_exp2_TH	3	pyramidal	2	244	341.764	Point 26	386.218	169.573	372.704	no cnx
2019_07_09_exp2_TH	3	pyramidal	2	244	341.764	Point 27	331.199	81.4817	372.704	no cnx
2019_07_09_exp2_TH	3	pyramidal	2	244	341.764	Point 39	449.627	183.432	381.904	no cnx
2019_07_09_exp2_TH	3	pyramidal	2	244	341.764	Point 33	313.626	119.146	372.714	no cnx
2019_07_09_exp2_TH	3	pyramidal	2	244	341.764	Point 38	342.175	217.995	381.904	no cnx
2019_07_09_exp2_TH	2	pyramidal	2	214	343.62	Point 11	511.559	-66.4105	374.454	no cnx
2019_07_09_exp2_TH	2	pyramidal	2	214	343.62	Point 10	462.506	24.8436	374.384	no cnx
2019_07_09_exp2_TH	2	pyramidal	2	214	343.62	Point 13	349.918	126.218	374.454	no cnx
2019_07_09_exp2_TH	2	pyramidal	2	214	343.62	Point 12	485.361	-15.685	374.454	no cnx
2019_07_09_exp2_TH	2	pyramidal	2	214	343.62	Point 15	435.38	118.404	374.454	no cnx
2019_07_09_exp2_TH	2	pyramidal	2	214	343.62	Point 14	464.355	190.594	374.454	excitatory
2019_07_09_exp2_TH	2	pyramidal	2	214	343.62	Point 17	525.53	120.856	374.454	no cnx
2019_07_09_exp2_TH	2	pyramidal	2	214	343.62	Point 16	419.918	55.6117	374.454	no cnx
2019_07_09_exp2_TH	2	pyramidal	2	214	343.62	Point 19	558.821	-19.2138	374.454	no cnx
2019_07_09_exp2_TH	2	pyramidal	2	214	343.62	Point 18	501.445	13.371	374.454	no cnx
2019_07_09_exp2_TH	2	pyramidal	2	214	343.62	Point 31	390.223	165.597	372.714	no cnx
2019_07_09_exp2_TH	2	pyramidal	2	214	343.62	Point 30	336.72	153.01	372.704	no cnx
2019_07_09_exp2_TH	2	pyramidal	2	214	343.62	Point 37	487.661	119.612	372.714	excitatory
2019_07_09_exp2_TH	2	pyramidal	2	214	343.62	Point 36	417.434	117.437	372.714	excitatory
2019_07_09_exp2_TH	2	pyramidal	2	214	343.62	Point 35	341.201	41.377	372.714	no cnx
2019_07_09_exp2_TH	2	pyramidal	2	214	343.62	Point 34	438.654	191.358	372.714	no cnx
2019_07_09_exp2_TH	2	pyramidal	2	214	343.62	Point 5	500.139	170.688	374.384	no cnx
2019_07_09_exp2_TH	2	pyramidal	2	214	343.62	Point 4	451.515	-21.2054	374.384	no cnx
2019_07_09_exp2_TH	2	pyramidal	2	214	343.62	Point 7	346.176	97.963	374.384	no cnx
2019_07_09_exp2_TH	2	pyramidal	2	214	343.62	Point 6	442.734	142.493	374.384	no cnx
2019_07_09_exp2_TH	2	pyramidal	2	214	343.62	Point 1	498.871	-39.4764	374.384	excitatory
2019_07_09_exp2_TH	2	pyramidal	2	214	343.62	Point 3	475.072	137.765	374.384	excitatory
2019_07_09_exp2_TH	2	pyramidal	2	214	343.62	Point 2	495.648	27.4126	374.384	no cnx
2019_07_09_exp2_TH	2	pyramidal	2	214	343.62	Point 9	325.773	42.3606	374.384	excitatory
2019_07_09_exp2_TH	2	pyramidal	2	214	343.62	Point 8	495.821	233.057	374.384	no cnx
2019_07_09_exp2_TH	2	pyramidal	2	214	343.62	Point 32	339.167	26.1338	372.714	no cnx
2019_07_09_exp2_TH	2	pyramidal	2	214	343.62	Point 42	409.001	372.923	381.904	no cnx
2019_07_09_exp2_TH	2	pyramidal	2	214	343.62	Point 43	442.747	243.724	381.904	no cnx
2019_07_09_exp2_TH	2	pyramidal	2	214	343.62	Point 40	442.91	382.829	381.904	no cnx
2019_07_09_exp2_TH	2	pyramidal	2	214	343.62	Point 41	373.095	291.061	381.904	excitatory
2019_07_09_exp2_TH	2	pyramidal	2	214	343.62	Point 46	452.255	210.112	381.904	no cnx
2019_07_09_exp2_TH	2	pyramidal	2	214	343.62	Point 44	364.599	126.992	381.904	no cnx
2019_07_09_exp2_TH	2	pyramidal	2	214	343.62	Point 45	377.247	410.749	381.904	no cnx
2019_07_09_exp2_TH	2	pyramidal	2	214	343.62	Point 28	473.826	40.7315	372.704	no cnx
2019_07_09_exp2_TH	2	pyramidal	2	214	343.62	Point 29	387.461	8.74408	372.704	no cnx
2019_07_09_exp2_TH	2	pyramidal	2	214	343.62	Point 20	474.572	74.4432	374.454	no cnx
2019_07_09_exp2_TH	2	pyramidal	2	214	343.62	Point 22	355.633	-3.07729	372.704	excitatory
2019_07_09_exp2_TH	2	pyramidal	2	214	343.62	Point 23	492.466	82.4181	372.704	no cnx
2019_07_09_exp2_TH	2	pyramidal	2	214	343.62	Point 24	356.089	49.2716	372.714	no cnx
2019_07_09_exp2_TH	2	pyramidal	2	214	343.62	Point 25	293.181	217.752	372.704	excitatory
2019_07_09_exp2_TH	2	pyramidal	2	214	343.62	Point 26	381.854	267.09	372.704	excitatory
2019_07_09_exp2_TH	2	pyramidal	2	214	343.62	Point 27	326.835	178.999	372.704	no cnx
2019_07_09_exp2_TH	2	pyramidal	2	214	343.62	Point 39	445.263	280.949	381.904	excitatory
2019_07_09_exp2_TH	2	pyramidal	2	214	343.62	Point 33	309.263	216.663	372.714	no cnx
2019_07_09_exp2_TH	2	pyramidal	2	214	343.62	Point 38	337.811	315.512	381.904	no cnx
2019_07_09_exp2_TH	1	pyramidal	2	199	360.62	Point 11	488.804	62.2935	374.454	excitatory
2019_07_09_exp2_TH	1	pyramidal	2	199	360.62	Point 10	439.752	153.548	374.384	no cnx
2019_07_09_exp2_TH	1	pyramidal	2	199	360.62	Point 13	327.164	254.922	374.454	no cnx
2019_07_09_exp2_TH	1	pyramidal	2	199	360.62	Point 12	462.606	113.019	374.454	no cnx
2019_07_09_exp2_TH	1	pyramidal	2	199	360.62	Point 15	412.626	247.108	374.454	excitatory
2019_07_09_exp2_TH	1	pyramidal	2	199	360.62	Point 14	441.601	319.298	374.454	no cnx
2019_07_09_exp2_TH	1	pyramidal	2	199	360.62	Point 17	502.775	249.56	374.454	no cnx
2019_07_09_exp2_TH	1	pyramidal	2	199	360.62	Point 16	397.163	184.316	374.454	no cnx
2019_07_09_exp2_TH	1	pyramidal	2	199	360.62	Point 19	536.067	109.49	374.454	no cnx
2019_07_09_exp2_TH	1	pyramidal	2	199	360.62	Point 18	478.69	142.075	374.454	no cnx
2019_07_09_exp2_TH	1	pyramidal	2	199	360.62	Point 31	367.468	294.301	372.714	no cnx
2019_07_09_exp2_TH	1	pyramidal	2	199	360.62	Point 30	313.965	281.714	372.704	no cnx
2019_07_09_exp2_TH	1	pyramidal	2	199	360.62	Point 37	464.906	248.316	372.714	no cnx
2019_07_09_exp2_TH	1	pyramidal	2	199	360.62	Point 36	394.679	246.141	372.714	no cnx
2019_07_09_exp2_TH	1	pyramidal	2	199	360.62	Point 35	318.447	170.081	372.714	no cnx
2019_07_09_exp2_TH	1	pyramidal	2	199	360.62	Point 34	415.9	320.062	372.714	excitatory
2019_07_09_exp2_TH	1	pyramidal	2	199	360.62	Point 5	477.384	299.392	374.384	no cnx
2019_07_09_exp2_TH	1	pyramidal	2	199	360.62	Point 4	428.76	107.499	374.384	no cnx
2019_07_09_exp2_TH	1	pyramidal	2	199	360.62	Point 7	323.421	226.667	374.384	excitatory
2019_07_09_exp2_TH	1	pyramidal	2	199	360.62	Point 6	419.979	271.197	374.384	no cnx
2019_07_09_exp2_TH	1	pyramidal	2	199	360.62	Point 1	476.117	89.2276	374.384	no cnx
2019_07_09_exp2_TH	1	pyramidal	2	199	360.62	Point 3	452.318	266.469	374.384	no cnx
2019_07_09_exp2_TH	1	pyramidal	2	199	360.62	Point 2	472.894	156.117	374.384	no cnx
2019_07_09_exp2_TH	1	pyramidal	2	199	360.62	Point 9	303.018	171.065	374.384	no cnx
2019_07_09_exp2_TH	1	pyramidal	2	199	360.62	Point 8	473.066	361.761	374.384	no cnx
2019_07_09_exp2_TH	1	pyramidal	2	199	360.62	Point 32	316.413	154.838	372.714	no cnx
2019_07_09_exp2_TH	1	pyramidal	2	199	360.62	Point 42	386.247	501.627	381.904	no cnx
2019_07_09_exp2_TH	1	pyramidal	2	199	360.62	Point 43	419.993	372.428	381.904	no cnx
2019_07_09_exp2_TH	1	pyramidal	2	199	360.62	Point 40	420.155	511.533	381.904	no cnx
2019_07_09_exp2_TH	1	pyramidal	2	199	360.62	Point 41	350.341	419.765	381.904	no cnx
2019_07_09_exp2_TH	1	pyramidal	2	199	360.62	Point 46	429.5	338.816	381.904	no cnx
2019_07_09_exp2_TH	1	pyramidal	2	199	360.62	Point 44	341.844	255.696	381.904	no cnx
2019_07_09_exp2_TH	1	pyramidal	2	199	360.62	Point 45	354.492	539.453	381.904	no cnx
2019_07_09_exp2_TH	1	pyramidal	2	199	360.62	Point 28	451.072	169.435	372.704	excitatory
2019_07_09_exp2_TH	1	pyramidal	2	199	360.62	Point 29	364.707	137.448	372.704	no cnx
2019_07_09_exp2_TH	1	pyramidal	2	199	360.62	Point 20	451.817	203.147	374.454	no cnx
2019_07_09_exp2_TH	1	pyramidal	2	199	360.62	Point 22	332.878	125.627	372.704	excitatory
2019_07_09_exp2_TH	1	pyramidal	2	199	360.62	Point 23	469.711	211.122	372.704	no cnx
2019_07_09_exp2_TH	1	pyramidal	2	199	360.62	Point 24	333.334	177.976	372.714	no cnx
2019_07_09_exp2_TH	1	pyramidal	2	199	360.62	Point 25	270.427	346.455	372.704	no cnx
2019_07_09_exp2_TH	1	pyramidal	2	199	360.62	Point 26	359.1	395.794	372.704	no cnx
2019_07_09_exp2_TH	1	pyramidal	2	199	360.62	Point 27	304.081	307.703	372.704	no cnx
2019_07_09_exp2_TH	1	pyramidal	2	199	360.62	Point 39	422.509	409.653	381.904	no cnx
2019_07_09_exp2_TH	1	pyramidal	2	199	360.62	Point 33	286.508	345.367	372.714	no cnx
2019_07_09_exp2_TH	1	pyramidal	2	199	360.62	Point 38	315.057	444.216	381.904	no cnx
2019_07_09_exp1_TH	3	pyramidal	2	268	343.844	Point 11	461.462	83.8934	379.574	no cnx
2019_07_09_exp1_TH	3	pyramidal	2	268	343.844	Point 10	439.463	20.0101	379.574	no cnx
2019_07_09_exp1_TH	3	pyramidal	2	268	343.844	Point 13	338.293	-49.176	379.574	no cnx
2019_07_09_exp1_TH	3	pyramidal	2	268	343.844	Point 12	505.473	-34.8155	379.574	no cnx
2019_07_09_exp1_TH	3	pyramidal	2	268	343.844	Point 15	476.99	-101.541	374.134	no cnx
2019_07_09_exp1_TH	3	pyramidal	2	268	343.844	Point 14	528.099	-139.728	379.574	no cnx
2019_07_09_exp1_TH	3	pyramidal	2	268	343.844	Point 17	457.537	111.515	374.134	no cnx
2019_07_09_exp1_TH	3	pyramidal	2	268	343.844	Point 16	370.381	100.503	374.134	excitatory
2019_07_09_exp1_TH	3	pyramidal	2	268	343.844	Point 19	374.081	-85.1145	374.134	no cnx
2019_07_09_exp1_TH	3	pyramidal	2	268	343.844	Point 18	385.234	55.6971	374.134	no cnx
2019_07_09_exp1_TH	3	pyramidal	2	268	343.844	Point 31	399.442	89.4798	389.094	excitatory
2019_07_09_exp1_TH	3	pyramidal	2	268	343.844	Point 30	533.059	147.225	389.094	no cnx
2019_07_09_exp1_TH	3	pyramidal	2	268	343.844	Point 5	498.229	-44.0632	379.574	no cnx
2019_07_09_exp1_TH	3	pyramidal	2	268	343.844	Point 4	396.893	-90.2174	379.574	excitatory
2019_07_09_exp1_TH	3	pyramidal	2	268	343.844	Point 7	399.502	24.5762	379.574	no cnx
2019_07_09_exp1_TH	3	pyramidal	2	268	343.844	Point 6	347.044	23.7881	379.574	no cnx
2019_07_09_exp1_TH	3	pyramidal	2	268	343.844	Point 1	367.285	-95.6261	379.574	no cnx
2019_07_09_exp1_TH	3	pyramidal	2	268	343.844	Point 3	369.134	-31.7238	379.574	no cnx
2019_07_09_exp1_TH	3	pyramidal	2	268	343.844	Point 2	516.306	-2.91396	379.574	no cnx
2019_07_09_exp1_TH	3	pyramidal	2	268	343.844	Point 9	487.495	69.9311	379.574	no cnx
2019_07_09_exp1_TH	3	pyramidal	2	268	343.844	Point 8	396.003	73.4278	379.574	no cnx
2019_07_09_exp1_TH	3	pyramidal	2	268	343.844	Point 32	500.439	36.314	389.094	no cnx
2019_07_09_exp1_TH	3	pyramidal	2	268	343.844	Point 28	457.811	-16.2667	389.094	no cnx
2019_07_09_exp1_TH	3	pyramidal	2	268	343.844	Point 29	370.426	-123.21	389.094	no cnx
2019_07_09_exp1_TH	3	pyramidal	2	268	343.844	Point 20	498.632	119.513	374.134	no cnx
2019_07_09_exp1_TH	3	pyramidal	2	268	343.844	Point 21	514.295	42.8751	374.134	no cnx
2019_07_09_exp1_TH	3	pyramidal	2	268	343.844	Point 22	517.207	110.474	379.754	excitatory
2019_07_09_exp1_TH	3	pyramidal	2	268	343.844	Point 23	600.784	-108.076	376.994	no cnx
2019_07_09_exp1_TH	3	pyramidal	2	268	343.844	Point 24	463.81	126.142	379.754	excitatory
2019_07_09_exp1_TH	3	pyramidal	2	268	343.844	Point 25	397.012	-163.006	376.994	no cnx
2019_07_09_exp1_TH	3	pyramidal	2	268	343.844	Point 26	426.814	-77.5415	376.994	no cnx
2019_07_09_exp1_TH	3	pyramidal	2	268	343.844	Point 27	378.194	-157.081	389.094	no cnx
2019_07_09_exp1_TH	2	pyramidal	2	226	338.004	Point 11	457.647	105.925	379.574	no cnx
2019_07_09_exp1_TH	2	pyramidal	2	226	338.004	Point 10	435.648	42.0417	379.574	no cnx
2019_07_09_exp1_TH	2	pyramidal	2	226	338.004	Point 13	334.478	-27.1443	379.574	no cnx
2019_07_09_exp1_TH	2	pyramidal	2	226	338.004	Point 12	501.658	-12.7838	379.574	no cnx
2019_07_09_exp1_TH	2	pyramidal	2	226	338.004	Point 15	473.175	-79.5089	374.134	no cnx
2019_07_09_exp1_TH	2	pyramidal	2	226	338.004	Point 14	524.284	-117.696	379.574	no cnx
2019_07_09_exp1_TH	2	pyramidal	2	226	338.004	Point 17	453.722	133.547	374.134	no cnx
2019_07_09_exp1_TH	2	pyramidal	2	226	338.004	Point 16	366.566	122.535	374.134	inhibitory
2019_07_09_exp1_TH	2	pyramidal	2	226	338.004	Point 19	370.267	-63.0828	374.134	no cnx
2019_07_09_exp1_TH	2	pyramidal	2	226	338.004	Point 18	381.419	77.7287	374.134	no cnx
2019_07_09_exp1_TH	2	pyramidal	2	226	338.004	Point 31	395.627	111.511	389.094	excitatory
2019_07_09_exp1_TH	2	pyramidal	2	226	338.004	Point 30	529.244	169.256	389.094	no cnx
2019_07_09_exp1_TH	2	pyramidal	2	226	338.004	Point 37	429.542	217.914	381.914	no cnx
2019_07_09_exp1_TH	2	pyramidal	2	226	338.004	Point 36	453.494	188.397	381.914	excitatory
2019_07_09_exp1_TH	2	pyramidal	2	226	338.004	Point 35	375.826	158.946	381.914	no cnx
2019_07_09_exp1_TH	2	pyramidal	2	226	338.004	Point 34	420.051	232.476	381.914	excitatory
2019_07_09_exp1_TH	2	pyramidal	2	226	338.004	Point 5	494.414	-22.0315	379.574	no cnx
2019_07_09_exp1_TH	2	pyramidal	2	226	338.004	Point 4	393.078	-68.1858	379.574	excitatory
2019_07_09_exp1_TH	2	pyramidal	2	226	338.004	Point 7	395.687	46.6079	379.574	no cnx
2019_07_09_exp1_TH	2	pyramidal	2	226	338.004	Point 6	343.229	45.8197	379.574	no cnx
2019_07_09_exp1_TH	2	pyramidal	2	226	338.004	Point 1	363.47	-73.5944	379.574	no cnx
2019_07_09_exp1_TH	2	pyramidal	2	226	338.004	Point 3	365.319	-9.69215	379.574	no cnx
2019_07_09_exp1_TH	2	pyramidal	2	226	338.004	Point 2	512.491	19.1177	379.574	no cnx
2019_07_09_exp1_TH	2	pyramidal	2	226	338.004	Point 9	483.68	91.9628	379.574	no cnx
2019_07_09_exp1_TH	2	pyramidal	2	226	338.004	Point 8	392.188	95.4594	379.574	no cnx
2019_07_09_exp1_TH	2	pyramidal	2	226	338.004	Point 32	496.624	58.3456	389.094	no cnx
2019_07_09_exp1_TH	2	pyramidal	2	226	338.004	Point 42	471.647	200.148	381.914	no cnx
2019_07_09_exp1_TH	2	pyramidal	2	226	338.004	Point 43	387.565	186.693	381.914	no cnx
2019_07_09_exp1_TH	2	pyramidal	2	226	338.004	Point 40	535.854	266.314	381.914	no cnx
2019_07_09_exp1_TH	2	pyramidal	2	226	338.004	Point 41	367.09	197.285	381.914	no cnx
2019_07_09_exp1_TH	2	pyramidal	2	226	338.004	Point 46	346.952	214.038	381.914	no cnx
2019_07_09_exp1_TH	2	pyramidal	2	226	338.004	Point 47	393.607	262.746	381.914	no cnx
2019_07_09_exp1_TH	2	pyramidal	2	226	338.004	Point 44	351.905	235.916	381.914	no cnx
2019_07_09_exp1_TH	2	pyramidal	2	226	338.004	Point 45	477.665	272.112	381.914	no cnx
2019_07_09_exp1_TH	2	pyramidal	2	226	338.004	Point 28	453.996	5.76493	389.094	no cnx
2019_07_09_exp1_TH	2	pyramidal	2	226	338.004	Point 29	366.611	-101.179	389.094	no cnx
2019_07_09_exp1_TH	2	pyramidal	2	226	338.004	Point 20	494.817	141.545	374.134	excitatory
2019_07_09_exp1_TH	2	pyramidal	2	226	338.004	Point 21	510.48	64.9067	374.134	no cnx
2019_07_09_exp1_TH	2	pyramidal	2	226	338.004	Point 22	513.392	132.505	379.754	excitatory
2019_07_09_exp1_TH	2	pyramidal	2	226	338.004	Point 23	596.969	-86.0447	376.994	no cnx
2019_07_09_exp1_TH	2	pyramidal	2	226	338.004	Point 24	459.995	148.174	379.754	no cnx
2019_07_09_exp1_TH	2	pyramidal	2	226	338.004	Point 25	393.197	-140.974	376.994	no cnx
2019_07_09_exp1_TH	2	pyramidal	2	226	338.004	Point 26	422.999	-55.5098	376.994	no cnx
2019_07_09_exp1_TH	2	pyramidal	2	226	338.004	Point 27	374.379	-135.049	389.094	no cnx
2019_07_09_exp1_TH	2	pyramidal	2	226	338.004	Point 39	413.121	196.425	381.914	no cnx
2019_07_09_exp1_TH	2	pyramidal	2	226	338.004	Point 33	427.464	175.456	381.914	no cnx
2019_07_09_exp1_TH	2	pyramidal	2	226	338.004	Point 38	277.641	215.107	381.914	no cnx
2019_07_09_exp1_TH	1	pyramidal	2	185	344.684	Point 11	459.879	246.521	379.574	no cnx
2019_07_09_exp1_TH	1	pyramidal	2	185	344.684	Point 10	437.88	182.638	379.574	no cnx
2019_07_09_exp1_TH	1	pyramidal	2	185	344.684	Point 13	336.71	113.452	379.574	no cnx
2019_07_09_exp1_TH	1	pyramidal	2	185	344.684	Point 12	503.89	127.812	379.574	no cnx
2019_07_09_exp1_TH	1	pyramidal	2	185	344.684	Point 15	475.407	61.087	374.134	no cnx
2019_07_09_exp1_TH	1	pyramidal	2	185	344.684	Point 14	526.516	22.8996	379.574	no cnx
2019_07_09_exp1_TH	1	pyramidal	2	185	344.684	Point 17	455.954	274.143	374.134	no cnx
2019_07_09_exp1_TH	1	pyramidal	2	185	344.684	Point 16	368.797	263.131	374.134	no cnx
2019_07_09_exp1_TH	1	pyramidal	2	185	344.684	Point 19	372.498	77.5131	374.134	no cnx
2019_07_09_exp1_TH	1	pyramidal	2	185	344.684	Point 18	383.651	218.325	374.134	no cnx
2019_07_09_exp1_TH	1	pyramidal	2	185	344.684	Point 5	496.646	118.564	379.574	no cnx
2019_07_09_exp1_TH	1	pyramidal	2	185	344.684	Point 4	395.31	72.4102	379.574	no cnx
2019_07_09_exp1_TH	1	pyramidal	2	185	344.684	Point 7	397.919	187.204	379.574	no cnx
2019_07_09_exp1_TH	1	pyramidal	2	185	344.684	Point 6	345.461	186.416	379.574	no cnx
2019_07_09_exp1_TH	1	pyramidal	2	185	344.684	Point 1	365.701	67.0015	379.574	no cnx
2019_07_09_exp1_TH	1	pyramidal	2	185	344.684	Point 3	367.551	130.904	379.574	no cnx
2019_07_09_exp1_TH	1	pyramidal	2	185	344.684	Point 2	514.723	159.714	379.574	no cnx
2019_07_09_exp1_TH	1	pyramidal	2	185	344.684	Point 9	485.912	232.559	379.574	no cnx
2019_07_09_exp1_TH	1	pyramidal	2	185	344.684	Point 8	394.42	236.055	379.574	no cnx
2019_07_09_exp1_TH	1	pyramidal	2	185	344.684	Point 20	497.049	282.141	374.134	no cnx
2019_07_09_exp1_TH	1	pyramidal	2	185	344.684	Point 21	512.712	205.503	374.134	no cnx
2019_07_09_exp1_TH	0	pyramidal	2	230	322.744	Point 11	460.953	252.645	379.574	no cnx
2019_07_09_exp1_TH	0	pyramidal	2	230	322.744	Point 10	438.954	188.762	379.574	no cnx
2019_07_09_exp1_TH	0	pyramidal	2	230	322.744	Point 13	337.784	119.576	379.574	no cnx
2019_07_09_exp1_TH	0	pyramidal	2	230	322.744	Point 12	504.964	133.936	379.574	excitatory
2019_07_09_exp1_TH	0	pyramidal	2	230	322.744	Point 15	476.481	67.2112	374.134	no cnx
2019_07_09_exp1_TH	0	pyramidal	2	230	322.744	Point 14	527.59	29.0238	379.574	no cnx
2019_07_09_exp1_TH	0	pyramidal	2	230	322.744	Point 17	457.028	280.267	374.134	no cnx
2019_07_09_exp1_TH	0	pyramidal	2	230	322.744	Point 16	369.872	269.255	374.134	excitatory
2019_07_09_exp1_TH	0	pyramidal	2	230	322.744	Point 19	373.572	83.6373	374.134	no cnx
2019_07_09_exp1_TH	0	pyramidal	2	230	322.744	Point 18	384.725	224.449	374.134	no cnx
2019_07_09_exp1_TH	0	pyramidal	2	230	322.744	Point 31	398.933	258.232	389.094	no cnx
2019_07_09_exp1_TH	0	pyramidal	2	230	322.744	Point 30	532.55	315.976	389.094	no cnx
2019_07_09_exp1_TH	0	pyramidal	2	230	322.744	Point 37	432.848	364.635	381.914	no cnx
2019_07_09_exp1_TH	0	pyramidal	2	230	322.744	Point 36	456.8	335.118	381.914	no cnx
2019_07_09_exp1_TH	0	pyramidal	2	230	322.744	Point 35	379.132	305.666	381.914	no cnx
2019_07_09_exp1_TH	0	pyramidal	2	230	322.744	Point 34	423.357	379.196	381.914	no cnx
2019_07_09_exp1_TH	0	pyramidal	2	230	322.744	Point 5	497.72	124.689	379.574	excitatory
2019_07_09_exp1_TH	0	pyramidal	2	230	322.744	Point 4	396.384	78.5344	379.574	no cnx
2019_07_09_exp1_TH	0	pyramidal	2	230	322.744	Point 7	398.993	193.328	379.574	no cnx
2019_07_09_exp1_TH	0	pyramidal	2	230	322.744	Point 6	346.535	192.54	379.574	no cnx
2019_07_09_exp1_TH	0	pyramidal	2	230	322.744	Point 1	366.776	73.1257	379.574	no cnx
2019_07_09_exp1_TH	0	pyramidal	2	230	322.744	Point 3	368.625	137.028	379.574	no cnx
2019_07_09_exp1_TH	0	pyramidal	2	230	322.744	Point 2	515.797	165.838	379.574	no cnx
2019_07_09_exp1_TH	0	pyramidal	2	230	322.744	Point 9	486.986	238.683	379.574	excitatory
2019_07_09_exp1_TH	0	pyramidal	2	230	322.744	Point 8	395.494	242.18	379.574	no cnx
2019_07_09_exp1_TH	0	pyramidal	2	230	322.744	Point 32	499.93	205.066	389.094	no cnx
2019_07_09_exp1_TH	0	pyramidal	2	230	322.744	Point 42	474.953	346.868	381.914	no cnx
2019_07_09_exp1_TH	0	pyramidal	2	230	322.744	Point 40	539.16	413.034	381.914	excitatory
2019_07_09_exp1_TH	0	pyramidal	2	230	322.744	Point 41	370.396	344.005	381.914	no cnx
2019_07_09_exp1_TH	0	pyramidal	2	230	322.744	Point 28	457.302	152.485	389.094	no cnx
2019_07_09_exp1_TH	0	pyramidal	2	230	322.744	Point 29	369.917	45.5416	389.094	no cnx
2019_07_09_exp1_TH	0	pyramidal	2	230	322.744	Point 20	498.123	288.265	374.134	no cnx
2019_07_09_exp1_TH	0	pyramidal	2	230	322.744	Point 21	513.786	211.627	374.134	no cnx
2019_07_09_exp1_TH	0	pyramidal	2	230	322.744	Point 22	516.698	279.225	379.754	no cnx
2019_07_09_exp1_TH	0	pyramidal	2	230	322.744	Point 23	600.275	60.6754	376.994	no cnx
2019_07_09_exp1_TH	0	pyramidal	2	230	322.744	Point 24	463.301	294.894	379.754	no cnx
2019_07_09_exp1_TH	0	pyramidal	2	230	322.744	Point 25	396.503	5.74625	376.994	no cnx
2019_07_09_exp1_TH	0	pyramidal	2	230	322.744	Point 26	426.305	91.2103	376.994	no cnx
2019_07_09_exp1_TH	0	pyramidal	2	230	322.744	Point 27	377.685	11.6711	389.094	no cnx
2019_07_09_exp1_TH	0	pyramidal	2	230	322.744	Point 33	430.77	322.176	381.914	no cnx
2019_07_09_exp1_TH	0	pyramidal	2	230	322.744	Point 38	280.947	361.827	381.914	no cnx
2019_06_28_exp2_TH	1	pyramidal	2	177	-5618.7	Point 59	365.575	-540.914	-5620.11	no cnx
2019_06_28_exp2_TH	1	pyramidal	2	177	-5618.7	Point 58	523.714	-571.256	-5628.66	no cnx
2019_06_28_exp2_TH	1	pyramidal	2	177	-5618.7	Point 55	412.95	-355.578	-5628.66	no cnx
2019_06_28_exp2_TH	1	pyramidal	2	177	-5618.7	Point 54	575.955	-392.8	-5628.66	no cnx
2019_06_28_exp2_TH	1	pyramidal	2	177	-5618.7	Point 57	444.296	-455.963	-5628.66	no cnx
2019_06_28_exp2_TH	1	pyramidal	2	177	-5618.7	Point 56	407.346	-372.964	-5628.66	no cnx
2019_06_28_exp2_TH	1	pyramidal	2	177	-5618.7	Point 51	391.758	-521.726	-5628.66	no cnx
2019_06_28_exp2_TH	1	pyramidal	2	177	-5618.7	Point 53	420.76	-504.853	-5628.66	no cnx
2019_06_28_exp2_TH	1	pyramidal	2	177	-5618.7	Point 52	385.27	-566.825	-5628.66	no cnx
2019_06_28_exp2_TH	1	pyramidal	2	177	-5618.7	Point 11	523.333	-291.603	-5626.47	excitatory
2019_06_28_exp2_TH	1	pyramidal	2	177	-5618.7	Point 10	578.446	8.93525	-5618.63	excitatory
2019_06_28_exp2_TH	1	pyramidal	2	177	-5618.7	Point 13	558.133	-337.231	-5626.47	no cnx
2019_06_28_exp2_TH	1	pyramidal	2	177	-5618.7	Point 12	343.612	-339.36	-5626.47	no cnx
2019_06_28_exp2_TH	1	pyramidal	2	177	-5618.7	Point 15	364.235	-340.741	-5626.47	no cnx
2019_06_28_exp2_TH	1	pyramidal	2	177	-5618.7	Point 14	413.759	-485.567	-5626.47	no cnx
2019_06_28_exp2_TH	1	pyramidal	2	177	-5618.7	Point 17	534.378	-392.952	-5626.47	no cnx
2019_06_28_exp2_TH	1	pyramidal	2	177	-5618.7	Point 16	382.601	-274.505	-5626.47	no cnx
2019_06_28_exp2_TH	1	pyramidal	2	177	-5618.7	Point 19	383.388	-390.838	-5626.47	no cnx
2019_06_28_exp2_TH	1	pyramidal	2	177	-5618.7	Point 18	572.137	-310.671	-5626.47	excitatory
2019_06_28_exp2_TH	1	pyramidal	2	177	-5618.7	Point 31	579.197	-333.839	-5636.5	no cnx
2019_06_28_exp2_TH	1	pyramidal	2	177	-5618.7	Point 30	386.666	-324.303	-5636.5	no cnx
2019_06_28_exp2_TH	1	pyramidal	2	177	-5618.7	Point 37	532.084	-477.757	-5636.5	no cnx
2019_06_28_exp2_TH	1	pyramidal	2	177	-5618.7	Point 36	400.064	-350.534	-5636.5	no cnx
2019_06_28_exp2_TH	1	pyramidal	2	177	-5618.7	Point 35	577.567	-359.504	-5636.5	no cnx
2019_06_28_exp2_TH	1	pyramidal	2	177	-5618.7	Point 34	360.958	-302.634	-5636.5	no cnx
2019_06_28_exp2_TH	1	pyramidal	2	177	-5618.7	Point 5	543.928	45.1073	-5618.64	excitatory
2019_06_28_exp2_TH	1	pyramidal	2	177	-5618.7	Point 4	575.042	-201.941	-5618.64	no cnx
2019_06_28_exp2_TH	1	pyramidal	2	177	-5618.7	Point 7	414.613	-99.0934	-5618.63	no cnx
2019_06_28_exp2_TH	1	pyramidal	2	177	-5618.7	Point 6	553.442	-82.7958	-5618.64	excitatory
2019_06_28_exp2_TH	1	pyramidal	2	177	-5618.7	Point 1	403.777	-154.562	-5618.64	no cnx
2019_06_28_exp2_TH	1	pyramidal	2	177	-5618.7	Point 3	417.336	-17.3993	-5618.64	no cnx
2019_06_28_exp2_TH	1	pyramidal	2	177	-5618.7	Point 2	572.126	-26.8568	-5618.64	no cnx
2019_06_28_exp2_TH	1	pyramidal	2	177	-5618.7	Point 68	296.081	57.6604	-5585.34	no cnx
2019_06_28_exp2_TH	1	pyramidal	2	177	-5618.7	Point 9	424.644	-199.9	-5618.63	no cnx
2019_06_28_exp2_TH	1	pyramidal	2	177	-5618.7	Point 8	498.844	-199.164	-5618.63	no cnx
2019_06_28_exp2_TH	1	pyramidal	2	177	-5618.7	Point 69	361.656	-146.822	-5585.34	no cnx
2019_06_28_exp2_TH	1	pyramidal	2	177	-5618.7	Point 32	424.38	-264.733	-5636.5	no cnx
2019_06_28_exp2_TH	1	pyramidal	2	177	-5618.7	Point 70	449.033	-9.30412	-5585.34	no cnx
2019_06_28_exp2_TH	1	pyramidal	2	177	-5618.7	Point 48	376.198	-448.27	-5628.66	no cnx
2019_06_28_exp2_TH	1	pyramidal	2	177	-5618.7	Point 49	337.208	-484.068	-5628.66	no cnx
2019_06_28_exp2_TH	1	pyramidal	2	177	-5618.7	Point 42	424.47	-448.321	-5637.49	no cnx
2019_06_28_exp2_TH	1	pyramidal	2	177	-5618.7	Point 43	486.671	-506.916	-5637.49	no cnx
2019_06_28_exp2_TH	1	pyramidal	2	177	-5618.7	Point 40	460.406	-528.359	-5637.49	no cnx
2019_06_28_exp2_TH	1	pyramidal	2	177	-5618.7	Point 41	372.451	-494.089	-5637.49	no cnx
2019_06_28_exp2_TH	1	pyramidal	2	177	-5618.7	Point 46	546.607	-531.354	-5637.49	no cnx
2019_06_28_exp2_TH	1	pyramidal	2	177	-5618.7	Point 47	396.349	-539.255	-5628.66	no cnx
2019_06_28_exp2_TH	1	pyramidal	2	177	-5618.7	Point 44	580.888	-541.605	-5637.49	no cnx
2019_06_28_exp2_TH	1	pyramidal	2	177	-5618.7	Point 45	456.732	-546.207	-5637.49	no cnx
2019_06_28_exp2_TH	1	pyramidal	2	177	-5618.7	Point 28	569.844	-444.081	-5626.47	no cnx
2019_06_28_exp2_TH	1	pyramidal	2	177	-5618.7	Point 29	504.5	-455.461	-5626.47	no cnx
2019_06_28_exp2_TH	1	pyramidal	2	177	-5618.7	Point 66	379.699	-214.251	-5606.17	no cnx
2019_06_28_exp2_TH	1	pyramidal	2	177	-5618.7	Point 67	367.234	-160.465	-5585.34	no cnx
2019_06_28_exp2_TH	1	pyramidal	2	177	-5618.7	Point 60	413.849	-554.395	-5620.11	no cnx
2019_06_28_exp2_TH	1	pyramidal	2	177	-5618.7	Point 61	531.755	-453.575	-5620.11	no cnx
2019_06_28_exp2_TH	1	pyramidal	2	177	-5618.7	Point 62	550.95	-544.37	-5620.11	no cnx
2019_06_28_exp2_TH	1	pyramidal	2	177	-5618.7	Point 63	365.795	16.8047	-5606.17	no cnx
2019_06_28_exp2_TH	1	pyramidal	2	177	-5618.7	Point 21	574.15	-235.448	-5626.47	no cnx
2019_06_28_exp2_TH	1	pyramidal	2	177	-5618.7	Point 22	553.874	-375.256	-5626.47	no cnx
2019_06_28_exp2_TH	1	pyramidal	2	177	-5618.7	Point 23	579.341	-273.428	-5626.47	no cnx
2019_06_28_exp2_TH	1	pyramidal	2	177	-5618.7	Point 24	573.582	-420.794	-5626.47	no cnx
2019_06_28_exp2_TH	1	pyramidal	2	177	-5618.7	Point 25	534.875	-496.245	-5626.47	no cnx
2019_06_28_exp2_TH	1	pyramidal	2	177	-5618.7	Point 26	536.39	-372.493	-5626.47	no cnx
2019_06_28_exp2_TH	1	pyramidal	2	177	-5618.7	Point 27	587.133	-506.657	-5626.47	no cnx
2019_06_28_exp2_TH	1	pyramidal	2	177	-5618.7	Point 64	344.366	-152.38	-5606.17	no cnx
2019_06_28_exp2_TH	1	pyramidal	2	177	-5618.7	Point 65	465.588	2.39014	-5606.17	no cnx
2019_06_28_exp2_TH	1	pyramidal	2	177	-5618.7	Point 39	395.262	-268.539	-5636.5	no cnx
2019_06_28_exp2_TH	1	pyramidal	2	177	-5618.7	Point 71	417.833	-156.9	-5585.34	no cnx
2019_06_28_exp2_TH	1	pyramidal	2	177	-5618.7	Point 33	596.228	-457.514	-5636.5	no cnx
2019_06_28_exp2_TH	1	pyramidal	2	177	-5618.7	Point 38	387.358	-301.143	-5636.5	no cnx
2019_06_28_exp1_TH	2	pyramidal	2	247	-5644.11	Point 11	561.218	184.715	-5649.12	no cnx
2019_06_28_exp1_TH	2	pyramidal	2	247	-5644.11	Point 10	390.647	252.5	-5649.12	no cnx
2019_06_28_exp1_TH	2	pyramidal	2	247	-5644.11	Point 13	594.855	161.966	-5649.12	no cnx
2019_06_28_exp1_TH	2	pyramidal	2	247	-5644.11	Point 12	423.184	220.663	-5649.12	excitatory
2019_06_28_exp1_TH	2	pyramidal	2	247	-5644.11	Point 15	407.814	195.001	-5649.12	no cnx
2019_06_28_exp1_TH	2	pyramidal	2	247	-5644.11	Point 14	439.688	186.178	-5649.12	no cnx
2019_06_28_exp1_TH	2	pyramidal	2	247	-5644.11	Point 17	589.76	142.493	-5649.12	no cnx
2019_06_28_exp1_TH	2	pyramidal	2	247	-5644.11	Point 16	454.696	152.628	-5649.12	no cnx
2019_06_28_exp1_TH	2	pyramidal	2	247	-5644.11	Point 19	461.368	134.581	-5649.12	no cnx
2019_06_28_exp1_TH	2	pyramidal	2	247	-5644.11	Point 18	416.429	29.384	-5649.12	no cnx
2019_06_28_exp1_TH	2	pyramidal	2	247	-5644.11	Point 31	631.68	137.787	-5657.93	no cnx
2019_06_28_exp1_TH	2	pyramidal	2	247	-5644.11	Point 30	598.699	148.621	-5657.93	no cnx
2019_06_28_exp1_TH	2	pyramidal	2	247	-5644.11	Point 37	334.684	281.896	-5665.02	no cnx
2019_06_28_exp1_TH	2	pyramidal	2	247	-5644.11	Point 36	423.419	140.641	-5657.93	no cnx
2019_06_28_exp1_TH	2	pyramidal	2	247	-5644.11	Point 35	402.876	60.2025	-5657.93	excitatory
2019_06_28_exp1_TH	2	pyramidal	2	247	-5644.11	Point 34	471.378	189.872	-5657.93	no cnx
2019_06_28_exp1_TH	2	pyramidal	2	247	-5644.11	Point 5	485.756	156.185	-5635.42	no cnx
2019_06_28_exp1_TH	2	pyramidal	2	247	-5644.11	Point 4	413.712	217.399	-5635.42	no cnx
2019_06_28_exp1_TH	2	pyramidal	2	247	-5644.11	Point 7	425.013	186.228	-5649.12	no cnx
2019_06_28_exp1_TH	2	pyramidal	2	247	-5644.11	Point 6	396.689	237.557	-5635.42	no cnx
2019_06_28_exp1_TH	2	pyramidal	2	247	-5644.11	Point 1	389.852	128.243	-5635.42	no cnx
2019_06_28_exp1_TH	2	pyramidal	2	247	-5644.11	Point 3	413.194	178.453	-5635.42	no cnx
2019_06_28_exp1_TH	2	pyramidal	2	247	-5644.11	Point 2	461.127	242.546	-5635.42	no cnx
2019_06_28_exp1_TH	2	pyramidal	2	247	-5644.11	Point 9	418.643	281.6	-5649.12	no cnx
2019_06_28_exp1_TH	2	pyramidal	2	247	-5644.11	Point 8	546.434	298.554	-5649.12	no cnx
2019_06_28_exp1_TH	2	pyramidal	2	247	-5644.11	Point 32	607.437	226.81	-5657.93	no cnx
2019_06_28_exp1_TH	2	pyramidal	2	247	-5644.11	Point 42	561.26	172.386	-5665.02	no cnx
2019_06_28_exp1_TH	2	pyramidal	2	247	-5644.11	Point 43	460.69	156.119	-5665.02	no cnx
2019_06_28_exp1_TH	2	pyramidal	2	247	-5644.11	Point 40	376.679	280.59	-5665.02	no cnx
2019_06_28_exp1_TH	2	pyramidal	2	247	-5644.11	Point 41	430.782	215.066	-5665.02	no cnx
2019_06_28_exp1_TH	2	pyramidal	2	247	-5644.11	Point 28	585.133	119.704	-5657.93	no cnx
2019_06_28_exp1_TH	2	pyramidal	2	247	-5644.11	Point 29	404.249	205.799	-5657.93	no cnx
2019_06_28_exp1_TH	2	pyramidal	2	247	-5644.11	Point 20	588.283	104.512	-5649.12	no cnx
2019_06_28_exp1_TH	2	pyramidal	2	247	-5644.11	Point 21	435.207	164.19	-5649.12	no cnx
2019_06_28_exp1_TH	2	pyramidal	2	247	-5644.11	Point 22	452.329	206.38	-5649.12	no cnx
2019_06_28_exp1_TH	2	pyramidal	2	247	-5644.11	Point 23	423.741	120.876	-5657.92	no cnx
2019_06_28_exp1_TH	2	pyramidal	2	247	-5644.11	Point 24	543.061	232.194	-5657.92	no cnx
2019_06_28_exp1_TH	2	pyramidal	2	247	-5644.11	Point 25	653.234	139.711	-5657.92	no cnx
2019_06_28_exp1_TH	2	pyramidal	2	247	-5644.11	Point 26	373.359	254.69	-5657.92	no cnx
2019_06_28_exp1_TH	2	pyramidal	2	247	-5644.11	Point 27	536.465	217.195	-5657.93	no cnx
2019_06_28_exp1_TH	2	pyramidal	2	247	-5644.11	Point 39	572.663	165.348	-5665.02	no cnx
2019_06_28_exp1_TH	2	pyramidal	2	247	-5644.11	Point 33	559.506	264.642	-5657.93	excitatory
2019_06_28_exp1_TH	2	pyramidal	2	247	-5644.11	Point 38	528.611	284.047	-5665.02	no cnx
2019_06_28_exp1_TH	0	pyramidal	2	256	-5637.3	Point 11	573.638	23.3164	-5649.12	no cnx
2019_06_28_exp1_TH	0	pyramidal	2	256	-5637.3	Point 10	403.066	91.1011	-5649.12	no cnx
2019_06_28_exp1_TH	0	pyramidal	2	256	-5637.3	Point 13	607.275	0.567386	-5649.12	no cnx
2019_06_28_exp1_TH	0	pyramidal	2	256	-5637.3	Point 12	435.604	59.2643	-5649.12	no cnx
2019_06_28_exp1_TH	0	pyramidal	2	256	-5637.3	Point 15	420.233	33.6029	-5649.12	no cnx
2019_06_28_exp1_TH	0	pyramidal	2	256	-5637.3	Point 14	452.108	24.7794	-5649.12	no cnx
2019_06_28_exp1_TH	0	pyramidal	2	256	-5637.3	Point 17	602.18	-18.9053	-5649.12	no cnx
2019_06_28_exp1_TH	0	pyramidal	2	256	-5637.3	Point 16	467.115	-8.77017	-5649.12	no cnx
2019_06_28_exp1_TH	0	pyramidal	2	256	-5637.3	Point 19	473.787	-26.8176	-5649.12	no cnx
2019_06_28_exp1_TH	0	pyramidal	2	256	-5637.3	Point 18	428.849	-132.014	-5649.12	no cnx
2019_06_28_exp1_TH	0	pyramidal	2	256	-5637.3	Point 30	611.118	-12.7771	-5657.93	no cnx
2019_06_28_exp1_TH	0	pyramidal	2	256	-5637.3	Point 5	498.176	-5.21291	-5635.42	excitatory
2019_06_28_exp1_TH	0	pyramidal	2	256	-5637.3	Point 4	426.131	56.0005	-5635.42	no cnx
2019_06_28_exp1_TH	0	pyramidal	2	256	-5637.3	Point 7	437.432	24.8298	-5649.12	no cnx
2019_06_28_exp1_TH	0	pyramidal	2	256	-5637.3	Point 6	409.109	76.1584	-5635.42	no cnx
2019_06_28_exp1_TH	0	pyramidal	2	256	-5637.3	Point 1	402.271	-33.1551	-5635.42	no cnx
2019_06_28_exp1_TH	0	pyramidal	2	256	-5637.3	Point 3	425.614	17.055	-5635.42	no cnx
2019_06_28_exp1_TH	0	pyramidal	2	256	-5637.3	Point 2	473.546	81.1474	-5635.42	no cnx
2019_06_28_exp1_TH	0	pyramidal	2	256	-5637.3	Point 9	431.063	120.202	-5649.12	no cnx
2019_06_28_exp1_TH	0	pyramidal	2	256	-5637.3	Point 8	558.853	137.155	-5649.12	no cnx
2019_06_28_exp1_TH	0	pyramidal	2	256	-5637.3	Point 28	597.552	-41.6942	-5657.93	no cnx
2019_06_28_exp1_TH	0	pyramidal	2	256	-5637.3	Point 29	416.669	44.4007	-5657.93	no cnx
2019_06_28_exp1_TH	0	pyramidal	2	256	-5637.3	Point 20	600.702	-56.8866	-5649.12	no cnx
2019_06_28_exp1_TH	0	pyramidal	2	256	-5637.3	Point 21	447.626	2.79185	-5649.12	no cnx
2019_06_28_exp1_TH	0	pyramidal	2	256	-5637.3	Point 22	464.748	44.9817	-5649.12	no cnx
2019_06_28_exp1_TH	0	pyramidal	2	256	-5637.3	Point 23	436.16	-40.5226	-5657.92	no cnx
2019_06_28_exp1_TH	0	pyramidal	2	256	-5637.3	Point 24	555.48	70.7958	-5657.92	no cnx
2019_06_28_exp1_TH	0	pyramidal	2	256	-5637.3	Point 25	665.653	-21.687	-5657.92	no cnx
2019_06_28_exp1_TH	0	pyramidal	2	256	-5637.3	Point 26	385.779	93.2914	-5657.92	no cnx
2019_06_28_exp1_TH	0	pyramidal	2	256	-5637.3	Point 27	548.885	55.7971	-5657.93	no cnx
2019_06_05_exp3_TH	1	pyramidal	2	187	598.675	Point 11	527.874	-63.4495	577.605	no cnx
2019_06_05_exp3_TH	1	pyramidal	2	187	598.675	Point 10	450.882	-40.7822	577.605	no cnx
2019_06_05_exp3_TH	1	pyramidal	2	187	598.675	Point 13	510.781	-55.48	577.605	no cnx
2019_06_05_exp3_TH	1	pyramidal	2	187	598.675	Point 12	448.146	26.2387	577.605	no cnx
2019_06_05_exp3_TH	1	pyramidal	2	187	598.675	Point 15	513.606	75.0591	568.385	no cnx
2019_06_05_exp3_TH	1	pyramidal	2	187	598.675	Point 14	381.214	49.5397	568.385	no cnx
2019_06_05_exp3_TH	1	pyramidal	2	187	598.675	Point 17	531.634	-79.5193	568.385	no cnx
2019_06_05_exp3_TH	1	pyramidal	2	187	598.675	Point 16	423.371	-70.3369	568.385	no cnx
2019_06_05_exp3_TH	1	pyramidal	2	187	598.675	Point 19	487.894	-42.744	568.385	no cnx
2019_06_05_exp3_TH	1	pyramidal	2	187	598.675	Point 18	523.306	49.669	568.385	no cnx
2019_06_05_exp3_TH	1	pyramidal	2	187	598.675	Point 31	445.912	-221.518	571.245	no cnx
2019_06_05_exp3_TH	1	pyramidal	2	187	598.675	Point 30	392.156	-148.916	571.245	no cnx
2019_06_05_exp3_TH	1	pyramidal	2	187	598.675	Point 5	474.439	34.3562	577.605	no cnx
2019_06_05_exp3_TH	1	pyramidal	2	187	598.675	Point 4	591.439	110.188	577.605	no cnx
2019_06_05_exp3_TH	1	pyramidal	2	187	598.675	Point 7	396.401	-29.7082	577.605	no cnx
2019_06_05_exp3_TH	1	pyramidal	2	187	598.675	Point 6	444.875	-34.6024	577.605	no cnx
2019_06_05_exp3_TH	1	pyramidal	2	187	598.675	Point 1	494.394	9.79945	577.605	no cnx
2019_06_05_exp3_TH	1	pyramidal	2	187	598.675	Point 3	448.568	-74.5858	577.605	no cnx
2019_06_05_exp3_TH	1	pyramidal	2	187	598.675	Point 2	426.879	-13.7397	577.605	no cnx
2019_06_05_exp3_TH	1	pyramidal	2	187	598.675	Point 9	460.163	-101.175	577.605	no cnx
2019_06_05_exp3_TH	1	pyramidal	2	187	598.675	Point 8	483.854	-93.5506	577.605	no cnx
2019_06_05_exp3_TH	1	pyramidal	2	187	598.675	Point 28	484.716	-184.234	571.245	no cnx
2019_06_05_exp3_TH	1	pyramidal	2	187	598.675	Point 29	387.459	-220.283	571.245	no cnx
2019_06_05_exp3_TH	1	pyramidal	2	187	598.675	Point 20	412.201	-109.542	568.385	excitatory
2019_06_05_exp3_TH	1	pyramidal	2	187	598.675	Point 21	479.977	7.01604	568.385	no cnx
2019_06_05_exp3_TH	1	pyramidal	2	187	598.675	Point 22	592.318	-45.1734	568.385	no cnx
2019_06_05_exp3_TH	1	pyramidal	2	187	598.675	Point 23	495.001	-42.5983	580.005	excitatory
2019_06_05_exp3_TH	1	pyramidal	2	187	598.675	Point 24	394.122	82.8335	580.005	no cnx
2019_06_05_exp3_TH	1	pyramidal	2	187	598.675	Point 25	380.22	-26.8213	580.005	no cnx
2019_06_05_exp3_TH	1	pyramidal	2	187	598.675	Point 26	431.002	41.5079	580.005	no cnx
2019_06_05_exp3_TH	1	pyramidal	2	187	598.675	Point 27	534.936	-158.671	571.245	excitatory
2019_06_05_exp3_TH	0	pyramidal	2	266	598.471	Point 11	530.931	-192.741	577.605	no cnx
2019_06_05_exp3_TH	0	pyramidal	2	266	598.471	Point 10	453.939	-170.074	577.605	no cnx
2019_06_05_exp3_TH	0	pyramidal	2	266	598.471	Point 13	513.839	-184.772	577.605	no cnx
2019_06_05_exp3_TH	0	pyramidal	2	266	598.471	Point 12	451.203	-103.053	577.605	no cnx
2019_06_05_exp3_TH	0	pyramidal	2	266	598.471	Point 15	516.663	-54.2328	568.385	no cnx
2019_06_05_exp3_TH	0	pyramidal	2	266	598.471	Point 14	384.272	-79.7522	568.385	no cnx
2019_06_05_exp3_TH	0	pyramidal	2	266	598.471	Point 17	534.691	-208.811	568.385	no cnx
2019_06_05_exp3_TH	0	pyramidal	2	266	598.471	Point 16	426.429	-199.629	568.385	no cnx
2019_06_05_exp3_TH	0	pyramidal	2	266	598.471	Point 19	490.952	-172.036	568.385	no cnx
2019_06_05_exp3_TH	0	pyramidal	2	266	598.471	Point 18	526.363	-79.6229	568.385	no cnx
2019_06_05_exp3_TH	0	pyramidal	2	266	598.471	Point 31	448.97	-350.81	571.245	no cnx
2019_06_05_exp3_TH	0	pyramidal	2	266	598.471	Point 30	395.213	-278.208	571.245	no cnx
2019_06_05_exp3_TH	0	pyramidal	2	266	598.471	Point 5	477.497	-94.9357	577.605	no cnx
2019_06_05_exp3_TH	0	pyramidal	2	266	598.471	Point 4	594.496	-19.1043	577.605	no cnx
2019_06_05_exp3_TH	0	pyramidal	2	266	598.471	Point 7	399.459	-159	577.605	no cnx
2019_06_05_exp3_TH	0	pyramidal	2	266	598.471	Point 6	447.932	-163.894	577.605	no cnx
2019_06_05_exp3_TH	0	pyramidal	2	266	598.471	Point 1	497.451	-119.492	577.605	no cnx
2019_06_05_exp3_TH	0	pyramidal	2	266	598.471	Point 3	451.626	-203.878	577.605	no cnx
2019_06_05_exp3_TH	0	pyramidal	2	266	598.471	Point 2	429.936	-143.032	577.605	no cnx
2019_06_05_exp3_TH	0	pyramidal	2	266	598.471	Point 9	463.22	-230.467	577.605	no cnx
2019_06_05_exp3_TH	0	pyramidal	2	266	598.471	Point 8	486.911	-222.843	577.605	no cnx
2019_06_05_exp3_TH	0	pyramidal	2	266	598.471	Point 28	487.774	-313.526	571.245	no cnx
2019_06_05_exp3_TH	0	pyramidal	2	266	598.471	Point 29	390.516	-349.575	571.245	no cnx
2019_06_05_exp3_TH	0	pyramidal	2	266	598.471	Point 20	415.259	-238.834	568.385	no cnx
2019_06_05_exp3_TH	0	pyramidal	2	266	598.471	Point 21	483.034	-122.276	568.385	no cnx
2019_06_05_exp3_TH	0	pyramidal	2	266	598.471	Point 22	595.376	-174.465	568.385	no cnx
2019_06_05_exp3_TH	0	pyramidal	2	266	598.471	Point 23	498.059	-171.89	580.005	no cnx
2019_06_05_exp3_TH	0	pyramidal	2	266	598.471	Point 24	397.179	-46.4584	580.005	no cnx
2019_06_05_exp3_TH	0	pyramidal	2	266	598.471	Point 25	383.278	-156.113	580.005	no cnx
2019_06_05_exp3_TH	0	pyramidal	2	266	598.471	Point 26	434.06	-87.784	580.005	excitatory
2019_06_05_exp3_TH	0	pyramidal	2	266	598.471	Point 27	537.994	-287.963	571.245	no cnx
2019_06_05_exp2_TH	1	pyramidal	2	202	542.485	Point 55	494.049	-520.732	546.955	no cnx
2019_06_05_exp2_TH	1	pyramidal	2	202	542.485	Point 54	445.133	-429.625	546.955	no cnx
2019_06_05_exp2_TH	1	pyramidal	2	202	542.485	Point 57	475.32	-440.829	546.955	no cnx
2019_06_05_exp2_TH	1	pyramidal	2	202	542.485	Point 56	429.385	-467.23	546.955	no cnx
2019_06_05_exp2_TH	1	pyramidal	2	202	542.485	Point 51	447.087	-501.961	546.955	no cnx
2019_06_05_exp2_TH	1	pyramidal	2	202	542.485	Point 50	488.205	-412.59	546.955	no cnx
2019_06_05_exp2_TH	1	pyramidal	2	202	542.485	Point 53	464.74	-346.285	546.955	no cnx
2019_06_05_exp2_TH	1	pyramidal	2	202	542.485	Point 52	422.153	-316.147	546.955	no cnx
2019_06_05_exp2_TH	1	pyramidal	2	202	542.485	Point 11	552.953	-74.7452	554.205	no cnx
2019_06_05_exp2_TH	1	pyramidal	2	202	542.485	Point 10	439.401	-133.459	554.205	no cnx
2019_06_05_exp2_TH	1	pyramidal	2	202	542.485	Point 13	500.583	-210.13	554.205	no cnx
2019_06_05_exp2_TH	1	pyramidal	2	202	542.485	Point 12	413.206	-59.4082	554.205	no cnx
2019_06_05_exp2_TH	1	pyramidal	2	202	542.485	Point 15	531.092	-142.384	554.205	no cnx
2019_06_05_exp2_TH	1	pyramidal	2	202	542.485	Point 14	467.725	-109.762	554.205	no cnx
2019_06_05_exp2_TH	1	pyramidal	2	202	542.485	Point 17	502.024	-191.526	554.205	no cnx
2019_06_05_exp2_TH	1	pyramidal	2	202	542.485	Point 16	521.841	-96.6122	554.205	no cnx
2019_06_05_exp2_TH	1	pyramidal	2	202	542.485	Point 19	616.646	-137.482	542.655	no cnx
2019_06_05_exp2_TH	1	pyramidal	2	202	542.485	Point 18	696.565	-58.2847	542.655	no cnx
2019_06_05_exp2_TH	1	pyramidal	2	202	542.485	Point 31	535.658	-210.191	541.315	no cnx
2019_06_05_exp2_TH	1	pyramidal	2	202	542.485	Point 30	548.536	-245.574	541.315	no cnx
2019_06_05_exp2_TH	1	pyramidal	2	202	542.485	Point 37	591.499	-487.774	534.485	no cnx
2019_06_05_exp2_TH	1	pyramidal	2	202	542.485	Point 36	701.166	-304.728	534.485	no cnx
2019_06_05_exp2_TH	1	pyramidal	2	202	542.485	Point 35	545.044	-315.977	534.485	no cnx
2019_06_05_exp2_TH	1	pyramidal	2	202	542.485	Point 34	536.02	-438.01	534.485	no cnx
2019_06_05_exp2_TH	1	pyramidal	2	202	542.485	Point 5	397.429	261.705	554.205	no cnx
2019_06_05_exp2_TH	1	pyramidal	2	202	542.485	Point 4	428.625	263.729	554.205	no cnx
2019_06_05_exp2_TH	1	pyramidal	2	202	542.485	Point 7	392.169	75.5108	554.205	no cnx
2019_06_05_exp2_TH	1	pyramidal	2	202	542.485	Point 6	403.667	142.915	554.205	no cnx
2019_06_05_exp2_TH	1	pyramidal	2	202	542.485	Point 3	447.54	247.793	554.205	no cnx
2019_06_05_exp2_TH	1	pyramidal	2	202	542.485	Point 2	412.41	220.467	554.205	no cnx
2019_06_05_exp2_TH	1	pyramidal	2	202	542.485	Point 9	550.427	-207.741	554.205	no cnx
2019_06_05_exp2_TH	1	pyramidal	2	202	542.485	Point 8	390.635	-72.519	554.205	no cnx
2019_06_05_exp2_TH	1	pyramidal	2	202	542.485	Point 32	564.561	-165.558	534.485	no cnx
2019_06_05_exp2_TH	1	pyramidal	2	202	542.485	Point 48	444.9	-305.014	546.955	no cnx
2019_06_05_exp2_TH	1	pyramidal	2	202	542.485	Point 49	509.925	-324.298	546.955	no cnx
2019_06_05_exp2_TH	1	pyramidal	2	202	542.485	Point 42	477.383	-361.446	534.485	no cnx
2019_06_05_exp2_TH	1	pyramidal	2	202	542.485	Point 43	526.719	-378.882	534.485	no cnx
2019_06_05_exp2_TH	1	pyramidal	2	202	542.485	Point 40	568.829	-351.715	534.485	excitatory
2019_06_05_exp2_TH	1	pyramidal	2	202	542.485	Point 41	589.05	-421.203	534.485	no cnx
2019_06_05_exp2_TH	1	pyramidal	2	202	542.485	Point 46	444.543	-406.52	534.485	no cnx
2019_06_05_exp2_TH	1	pyramidal	2	202	542.485	Point 47	515.339	-405.377	534.485	no cnx
2019_06_05_exp2_TH	1	pyramidal	2	202	542.485	Point 44	539.822	-457.205	534.485	no cnx
2019_06_05_exp2_TH	1	pyramidal	2	202	542.485	Point 45	514.299	-359.677	534.485	no cnx
2019_06_05_exp2_TH	1	pyramidal	2	202	542.485	Point 28	557.964	-125.379	541.315	excitatory
2019_06_05_exp2_TH	1	pyramidal	2	202	542.485	Point 29	621.663	-82.4264	541.315	no cnx
2019_06_05_exp2_TH	1	pyramidal	2	202	542.485	Point 20	548.279	-175.986	542.655	no cnx
2019_06_05_exp2_TH	1	pyramidal	2	202	542.485	Point 21	599.314	56.428	542.655	no cnx
2019_06_05_exp2_TH	1	pyramidal	2	202	542.485	Point 22	684.069	-142.045	542.655	no cnx
2019_06_05_exp2_TH	1	pyramidal	2	202	542.485	Point 23	680.331	-84.5329	542.655	no cnx
2019_06_05_exp2_TH	1	pyramidal	2	202	542.485	Point 24	575.192	-253.501	542.655	no cnx
2019_06_05_exp2_TH	1	pyramidal	2	202	542.485	Point 25	711.332	-79.5491	542.655	no cnx
2019_06_05_exp2_TH	1	pyramidal	2	202	542.485	Point 26	574.799	-126.169	542.655	no cnx
2019_06_05_exp2_TH	1	pyramidal	2	202	542.485	Point 27	592.473	-218.365	542.655	no cnx
2019_06_05_exp2_TH	1	pyramidal	2	202	542.485	Point 39	599.483	-304.688	534.485	no cnx
2019_06_05_exp2_TH	1	pyramidal	2	202	542.485	Point 33	438.239	-380.381	534.485	no cnx
2019_06_05_exp2_TH	1	pyramidal	2	202	542.485	Point 38	531.603	-272.813	534.485	no cnx
2019_06_05_exp1_TH	2	pyramidal	2	245	476.825	Point 11	422.036	-128.085	500.315	no cnx
2019_06_05_exp1_TH	2	pyramidal	2	245	476.825	Point 10	516.442	10.3216	517.945	no cnx
2019_06_05_exp1_TH	2	pyramidal	2	245	476.825	Point 13	516.24	-7.5681	500.315	no cnx
2019_06_05_exp1_TH	2	pyramidal	2	245	476.825	Point 12	554.452	-98.3409	500.315	no cnx
2019_06_05_exp1_TH	2	pyramidal	2	245	476.825	Point 15	414.632	-47.9224	500.315	no cnx
2019_06_05_exp1_TH	2	pyramidal	2	245	476.825	Point 14	566.226	-30.7116	500.315	no cnx
2019_06_05_exp1_TH	2	pyramidal	2	245	476.825	Point 17	581.916	131.28	500.315	no cnx
2019_06_05_exp1_TH	2	pyramidal	2	245	476.825	Point 16	410.579	13.3879	500.315	no cnx
2019_06_05_exp1_TH	2	pyramidal	2	245	476.825	Point 19	526.891	-34.5961	500.315	no cnx
2019_06_05_exp1_TH	2	pyramidal	2	245	476.825	Point 18	469.682	-110.645	500.315	no cnx
2019_06_05_exp1_TH	2	pyramidal	2	245	476.825	Point 31	411.4	-98.3423	477.375	no cnx
2019_06_05_exp1_TH	2	pyramidal	2	245	476.825	Point 30	487.126	-215.976	503.545	no cnx
2019_06_05_exp1_TH	2	pyramidal	2	245	476.825	Point 37	550.105	-15.0104	477.375	no cnx
2019_06_05_exp1_TH	2	pyramidal	2	245	476.825	Point 36	549.683	36.4933	477.375	no cnx
2019_06_05_exp1_TH	2	pyramidal	2	245	476.825	Point 35	532.34	5.73729	477.375	no cnx
2019_06_05_exp1_TH	2	pyramidal	2	245	476.825	Point 34	599.281	0.00996979	477.375	no cnx
2019_06_05_exp1_TH	2	pyramidal	2	245	476.825	Point 5	550.975	149.816	517.945	no cnx
2019_06_05_exp1_TH	2	pyramidal	2	245	476.825	Point 4	511.257	48.8901	517.945	no cnx
2019_06_05_exp1_TH	2	pyramidal	2	245	476.825	Point 7	406.57	85.801	517.945	no cnx
2019_06_05_exp1_TH	2	pyramidal	2	245	476.825	Point 6	448.074	79.933	517.945	no cnx
2019_06_05_exp1_TH	2	pyramidal	2	245	476.825	Point 1	494.196	7.04938	517.945	no cnx
2019_06_05_exp1_TH	2	pyramidal	2	245	476.825	Point 3	528.876	-81.044	517.945	no cnx
2019_06_05_exp1_TH	2	pyramidal	2	245	476.825	Point 2	445.139	-6.77766	517.945	no cnx
2019_06_05_exp1_TH	2	pyramidal	2	245	476.825	Point 9	465.833	-150.365	517.945	no cnx
2019_06_05_exp1_TH	2	pyramidal	2	245	476.825	Point 8	498.173	-121.266	517.945	no cnx
2019_06_05_exp1_TH	2	pyramidal	2	245	476.825	Point 32	598	27.6419	477.375	no cnx
2019_06_05_exp1_TH	2	pyramidal	2	245	476.825	Point 42	407.526	-7.2108	473.925	no cnx
2019_06_05_exp1_TH	2	pyramidal	2	245	476.825	Point 43	420.27	77.6667	473.925	no cnx
2019_06_05_exp1_TH	2	pyramidal	2	245	476.825	Point 40	515.437	-44.1723	477.375	excitatory
2019_06_05_exp1_TH	2	pyramidal	2	245	476.825	Point 41	358.274	-17.4661	473.925	no cnx
2019_06_05_exp1_TH	2	pyramidal	2	245	476.825	Point 46	382.793	-70.5814	473.925	no cnx
2019_06_05_exp1_TH	2	pyramidal	2	245	476.825	Point 47	485.306	-74.9925	473.925	no cnx
2019_06_05_exp1_TH	2	pyramidal	2	245	476.825	Point 44	514.288	-74.0557	473.925	no cnx
2019_06_05_exp1_TH	2	pyramidal	2	245	476.825	Point 45	518.559	115.065	473.925	no cnx
2019_06_05_exp1_TH	2	pyramidal	2	245	476.825	Point 28	464.636	-235.071	503.545	no cnx
2019_06_05_exp1_TH	2	pyramidal	2	245	476.825	Point 29	519.165	-185.145	503.545	no cnx
2019_06_05_exp1_TH	2	pyramidal	2	245	476.825	Point 20	618.552	-52.1276	500.315	no cnx
2019_06_05_exp1_TH	2	pyramidal	2	245	476.825	Point 21	580.59	-110.392	503.545	no cnx
2019_06_05_exp1_TH	2	pyramidal	2	245	476.825	Point 22	556.784	-133.3	503.545	no cnx
2019_06_05_exp1_TH	2	pyramidal	2	245	476.825	Point 23	482.41	-200.358	503.545	no cnx
2019_06_05_exp1_TH	2	pyramidal	2	245	476.825	Point 24	429.28	-260.026	503.545	no cnx
2019_06_05_exp1_TH	2	pyramidal	2	245	476.825	Point 25	404.295	-163.072	503.545	no cnx
2019_06_05_exp1_TH	2	pyramidal	2	245	476.825	Point 26	385.259	-227.024	503.545	no cnx
2019_06_05_exp1_TH	2	pyramidal	2	245	476.825	Point 27	527.221	-145.417	503.545	no cnx
2019_06_05_exp1_TH	2	pyramidal	2	245	476.825	Point 39	549.589	-248.649	477.375	no cnx
2019_06_05_exp1_TH	2	pyramidal	2	245	476.825	Point 33	563.8	-202.757	477.375	no cnx
2019_06_05_exp1_TH	2	pyramidal	2	245	476.825	Point 38	560.761	-145.776	477.375	no cnx
2019_06_05_exp1_TH	1	pyramidal	2	185	483.145	Point 11	412.619	-8.8626	500.315	no cnx
2019_06_05_exp1_TH	1	pyramidal	2	185	483.145	Point 10	507.025	129.544	517.945	no cnx
2019_06_05_exp1_TH	1	pyramidal	2	185	483.145	Point 13	506.822	111.655	500.315	excitatory
2019_06_05_exp1_TH	1	pyramidal	2	185	483.145	Point 12	545.034	20.8818	500.315	no cnx
2019_06_05_exp1_TH	1	pyramidal	2	185	483.145	Point 15	405.214	71.3003	500.315	no cnx
2019_06_05_exp1_TH	1	pyramidal	2	185	483.145	Point 14	556.809	88.5111	500.315	no cnx
2019_06_05_exp1_TH	1	pyramidal	2	185	483.145	Point 17	572.498	250.502	500.315	no cnx
2019_06_05_exp1_TH	1	pyramidal	2	185	483.145	Point 16	401.162	132.611	500.315	no cnx
2019_06_05_exp1_TH	1	pyramidal	2	185	483.145	Point 19	517.474	84.6266	500.315	no cnx
2019_06_05_exp1_TH	1	pyramidal	2	185	483.145	Point 18	460.264	8.5776	500.315	no cnx
2019_06_05_exp1_TH	1	pyramidal	2	185	483.145	Point 31	401.983	20.8804	477.375	excitatory
2019_06_05_exp1_TH	1	pyramidal	2	185	483.145	Point 30	477.708	-96.7536	503.545	no cnx
2019_06_05_exp1_TH	1	pyramidal	2	185	483.145	Point 37	540.688	104.212	477.375	no cnx
2019_06_05_exp1_TH	1	pyramidal	2	185	483.145	Point 36	540.265	155.716	477.375	no cnx
2019_06_05_exp1_TH	1	pyramidal	2	185	483.145	Point 35	522.922	124.96	477.375	no cnx
2019_06_05_exp1_TH	1	pyramidal	2	185	483.145	Point 34	589.863	119.233	477.375	no cnx
2019_06_05_exp1_TH	1	pyramidal	2	185	483.145	Point 5	541.558	269.039	517.945	no cnx
2019_06_05_exp1_TH	1	pyramidal	2	185	483.145	Point 4	501.839	168.113	517.945	excitatory
2019_06_05_exp1_TH	1	pyramidal	2	185	483.145	Point 7	397.153	205.024	517.945	no cnx
2019_06_05_exp1_TH	1	pyramidal	2	185	483.145	Point 6	438.657	199.156	517.945	no cnx
2019_06_05_exp1_TH	1	pyramidal	2	185	483.145	Point 1	484.779	126.272	517.945	no cnx
2019_06_05_exp1_TH	1	pyramidal	2	185	483.145	Point 3	519.459	38.1787	517.945	no cnx
2019_06_05_exp1_TH	1	pyramidal	2	185	483.145	Point 2	435.722	112.445	517.945	no cnx
2019_06_05_exp1_TH	1	pyramidal	2	185	483.145	Point 9	456.416	-31.1424	517.945	no cnx
2019_06_05_exp1_TH	1	pyramidal	2	185	483.145	Point 8	488.756	-2.04341	517.945	no cnx
2019_06_05_exp1_TH	1	pyramidal	2	185	483.145	Point 32	588.583	146.865	477.375	no cnx
2019_06_05_exp1_TH	1	pyramidal	2	185	483.145	Point 42	398.109	112.012	473.925	no cnx
2019_06_05_exp1_TH	1	pyramidal	2	185	483.145	Point 43	410.853	196.889	473.925	no cnx
2019_06_05_exp1_TH	1	pyramidal	2	185	483.145	Point 40	506.02	75.0504	477.375	excitatory
2019_06_05_exp1_TH	1	pyramidal	2	185	483.145	Point 41	348.857	101.757	473.925	no cnx
2019_06_05_exp1_TH	1	pyramidal	2	185	483.145	Point 46	373.376	48.6412	473.925	no cnx
2019_06_05_exp1_TH	1	pyramidal	2	185	483.145	Point 47	475.889	44.2302	473.925	no cnx
2019_06_05_exp1_TH	1	pyramidal	2	185	483.145	Point 44	504.87	45.167	473.925	no cnx
2019_06_05_exp1_TH	1	pyramidal	2	185	483.145	Point 45	509.141	234.288	473.925	no cnx
2019_06_05_exp1_TH	1	pyramidal	2	185	483.145	Point 28	455.218	-115.848	503.545	excitatory
2019_06_05_exp1_TH	1	pyramidal	2	185	483.145	Point 29	509.748	-65.922	503.545	no cnx
2019_06_05_exp1_TH	1	pyramidal	2	185	483.145	Point 20	609.134	67.0951	500.315	no cnx
2019_06_05_exp1_TH	1	pyramidal	2	185	483.145	Point 21	571.172	8.83087	503.545	excitatory
2019_06_05_exp1_TH	1	pyramidal	2	185	483.145	Point 22	547.366	-14.0775	503.545	no cnx
2019_06_05_exp1_TH	1	pyramidal	2	185	483.145	Point 23	472.992	-81.1352	503.545	no cnx
2019_06_05_exp1_TH	1	pyramidal	2	185	483.145	Point 24	419.863	-140.803	503.545	no cnx
2019_06_05_exp1_TH	1	pyramidal	2	185	483.145	Point 25	394.878	-43.8498	503.545	no cnx
2019_06_05_exp1_TH	1	pyramidal	2	185	483.145	Point 26	375.842	-107.801	503.545	no cnx
2019_06_05_exp1_TH	1	pyramidal	2	185	483.145	Point 27	517.804	-26.1943	503.545	no cnx
2019_06_05_exp1_TH	1	pyramidal	2	185	483.145	Point 39	540.172	-129.427	477.375	no cnx
2019_06_05_exp1_TH	1	pyramidal	2	185	483.145	Point 33	554.383	-83.5348	477.375	no cnx
2019_06_05_exp1_TH	1	pyramidal	2	185	483.145	Point 38	551.343	-26.5531	477.375	no cnx
2019_05_29_exp1_TH	2	pyramidal	2	143	591.225	Point 59	318.709	120.049	624.615	no cnx
2019_05_29_exp1_TH	2	pyramidal	2	143	591.225	Point 58	330.642	47.298	624.615	no cnx
2019_05_29_exp1_TH	2	pyramidal	2	143	591.225	Point 55	344.293	297.47	555.055	no cnx
2019_05_29_exp1_TH	2	pyramidal	2	143	591.225	Point 54	496.947	355.031	555.055	no cnx
2019_05_29_exp1_TH	2	pyramidal	2	143	591.225	Point 57	298.805	29.0033	624.615	no cnx
2019_05_29_exp1_TH	2	pyramidal	2	143	591.225	Point 56	371.026	209.49	555.055	no cnx
2019_05_29_exp1_TH	2	pyramidal	2	143	591.225	Point 51	540.473	238.134	555.055	no cnx
2019_05_29_exp1_TH	2	pyramidal	2	143	591.225	Point 50	636.974	211.891	555.055	no cnx
2019_05_29_exp1_TH	2	pyramidal	2	143	591.225	Point 53	484.154	230.378	555.055	no cnx
2019_05_29_exp1_TH	2	pyramidal	2	143	591.225	Point 52	518.904	342.292	555.055	no cnx
2019_05_29_exp1_TH	2	pyramidal	2	143	591.225	Point 11	438.146	239.015	596.195	no cnx
2019_05_29_exp1_TH	2	pyramidal	2	143	591.225	Point 10	329.074	162.965	596.195	no cnx
2019_05_29_exp1_TH	2	pyramidal	2	143	591.225	Point 13	366.846	123.701	596.195	no cnx
2019_05_29_exp1_TH	2	pyramidal	2	143	591.225	Point 12	373.319	275.604	596.195	no cnx
2019_05_29_exp1_TH	2	pyramidal	2	143	591.225	Point 15	481.414	66.2345	596.195	no cnx
2019_05_29_exp1_TH	2	pyramidal	2	143	591.225	Point 14	355.439	259.547	596.195	no cnx
2019_05_29_exp1_TH	2	pyramidal	2	143	591.225	Point 17	315.3	17.6104	614.105	no cnx
2019_05_29_exp1_TH	2	pyramidal	2	143	591.225	Point 16	298.522	176.944	596.195	no cnx
2019_05_29_exp1_TH	2	pyramidal	2	143	591.225	Point 19	418.163	-65.5926	614.105	no cnx
2019_05_29_exp1_TH	2	pyramidal	2	143	591.225	Point 18	369.322	20.3634	614.105	no cnx
2019_05_29_exp1_TH	2	pyramidal	2	143	591.225	Point 31	522.454	264.939	575.225	no cnx
2019_05_29_exp1_TH	2	pyramidal	2	143	591.225	Point 30	512.612	175.121	575.225	no cnx
2019_05_29_exp1_TH	2	pyramidal	2	143	591.225	Point 37	469.729	277.199	574.105	no cnx
2019_05_29_exp1_TH	2	pyramidal	2	143	591.225	Point 36	486.191	328.011	574.105	no cnx
2019_05_29_exp1_TH	2	pyramidal	2	143	591.225	Point 35	514.837	279.773	574.105	no cnx
2019_05_29_exp1_TH	2	pyramidal	2	143	591.225	Point 34	491.031	375.516	574.105	no cnx
2019_05_29_exp1_TH	2	pyramidal	2	143	591.225	Point 5	342.26	80.6202	609.575	no cnx
2019_05_29_exp1_TH	2	pyramidal	2	143	591.225	Point 4	426.534	-38.4082	609.575	no cnx
2019_05_29_exp1_TH	2	pyramidal	2	143	591.225	Point 7	356.919	209.162	596.195	no cnx
2019_05_29_exp1_TH	2	pyramidal	2	143	591.225	Point 6	533.045	29.8716	609.575	no cnx
2019_05_29_exp1_TH	2	pyramidal	2	143	591.225	Point 1	353.806	32.2568	609.575	no cnx
2019_05_29_exp1_TH	2	pyramidal	2	143	591.225	Point 3	400.259	-95.0998	609.575	no cnx
2019_05_29_exp1_TH	2	pyramidal	2	143	591.225	Point 2	342.063	103.855	609.575	no cnx
2019_05_29_exp1_TH	2	pyramidal	2	143	591.225	Point 9	332.302	263.1	596.195	no cnx
2019_05_29_exp1_TH	2	pyramidal	2	143	591.225	Point 8	393.424	269.339	596.195	no cnx
2019_05_29_exp1_TH	2	pyramidal	2	143	591.225	Point 32	494.817	213.306	574.105	no cnx
2019_05_29_exp1_TH	2	pyramidal	2	143	591.225	Point 48	559.841	170.872	555.055	excitatory
2019_05_29_exp1_TH	2	pyramidal	2	143	591.225	Point 49	483.833	282.269	555.055	no cnx
2019_05_29_exp1_TH	2	pyramidal	2	143	591.225	Point 42	311.598	296.605	563.125	no cnx
2019_05_29_exp1_TH	2	pyramidal	2	143	591.225	Point 43	350.516	265.199	563.125	no cnx
2019_05_29_exp1_TH	2	pyramidal	2	143	591.225	Point 40	547.678	273.43	563.125	excitatory
2019_05_29_exp1_TH	2	pyramidal	2	143	591.225	Point 41	559.659	207.677	563.125	no cnx
2019_05_29_exp1_TH	2	pyramidal	2	143	591.225	Point 46	519.696	386.47	555.055	no cnx
2019_05_29_exp1_TH	2	pyramidal	2	143	591.225	Point 47	492.65	115.54	555.055	no cnx
2019_05_29_exp1_TH	2	pyramidal	2	143	591.225	Point 44	360.364	288.02	563.125	no cnx
2019_05_29_exp1_TH	2	pyramidal	2	143	591.225	Point 45	377.143	242.085	563.125	no cnx
2019_05_29_exp1_TH	2	pyramidal	2	143	591.225	Point 28	590.183	25.3001	575.225	no cnx
2019_05_29_exp1_TH	2	pyramidal	2	143	591.225	Point 29	503.811	262.948	575.225	no cnx
2019_05_29_exp1_TH	2	pyramidal	2	143	591.225	Point 60	378.266	105.288	624.615	no cnx
2019_05_29_exp1_TH	2	pyramidal	2	143	591.225	Point 61	276.937	153.877	624.615	no cnx
2019_05_29_exp1_TH	2	pyramidal	2	143	591.225	Point 20	372.663	65.768	614.105	no cnx
2019_05_29_exp1_TH	2	pyramidal	2	143	591.225	Point 21	408.548	139.436	614.105	no cnx
2019_05_29_exp1_TH	2	pyramidal	2	143	591.225	Point 22	292.01	141.152	614.105	no cnx
2019_05_29_exp1_TH	2	pyramidal	2	143	591.225	Point 23	408.783	208.397	614.105	no cnx
2019_05_29_exp1_TH	2	pyramidal	2	143	591.225	Point 24	349.889	196.02	614.105	no cnx
2019_05_29_exp1_TH	2	pyramidal	2	143	591.225	Point 25	565.971	2.11764	575.225	no cnx
2019_05_29_exp1_TH	2	pyramidal	2	143	591.225	Point 26	554.452	207.72	575.225	no cnx
2019_05_29_exp1_TH	2	pyramidal	2	143	591.225	Point 27	516.684	-22.5831	575.225	no cnx
2019_05_29_exp1_TH	2	pyramidal	2	143	591.225	Point 39	491.558	183.375	563.125	no cnx
2019_05_29_exp1_TH	2	pyramidal	2	143	591.225	Point 33	499.587	315.778	574.105	no cnx
2019_05_29_exp1_TH	2	pyramidal	2	143	591.225	Point 38	497.571	407.855	574.105	no cnx
2019_05_29_exp1_TH	1	pyramidal	2	148	598.535	Point 11	424.241	368.75	596.195	no cnx
2019_05_29_exp1_TH	1	pyramidal	2	148	598.535	Point 10	315.169	292.7	596.195	excitatory
2019_05_29_exp1_TH	1	pyramidal	2	148	598.535	Point 13	352.941	253.436	596.195	no cnx
2019_05_29_exp1_TH	1	pyramidal	2	148	598.535	Point 12	359.414	405.339	596.195	no cnx
2019_05_29_exp1_TH	1	pyramidal	2	148	598.535	Point 15	467.509	195.969	596.195	no cnx
2019_05_29_exp1_TH	1	pyramidal	2	148	598.535	Point 14	341.534	389.282	596.195	no cnx
2019_05_29_exp1_TH	1	pyramidal	2	148	598.535	Point 17	301.396	147.345	614.105	no cnx
2019_05_29_exp1_TH	1	pyramidal	2	148	598.535	Point 16	284.617	306.679	596.195	no cnx
2019_05_29_exp1_TH	1	pyramidal	2	148	598.535	Point 19	404.259	64.1422	614.105	no cnx
2019_05_29_exp1_TH	1	pyramidal	2	148	598.535	Point 18	355.418	150.098	614.105	no cnx
2019_05_29_exp1_TH	1	pyramidal	2	148	598.535	Point 5	328.356	210.355	609.575	no cnx
2019_05_29_exp1_TH	1	pyramidal	2	148	598.535	Point 4	412.629	91.3266	609.575	no cnx
2019_05_29_exp1_TH	1	pyramidal	2	148	598.535	Point 7	343.014	338.897	596.195	no cnx
2019_05_29_exp1_TH	1	pyramidal	2	148	598.535	Point 6	519.141	159.606	609.575	no cnx
2019_05_29_exp1_TH	1	pyramidal	2	148	598.535	Point 1	339.902	161.992	609.575	no cnx
2019_05_29_exp1_TH	1	pyramidal	2	148	598.535	Point 3	386.354	34.6351	609.575	no cnx
2019_05_29_exp1_TH	1	pyramidal	2	148	598.535	Point 2	328.159	233.59	609.575	no cnx
2019_05_29_exp1_TH	1	pyramidal	2	148	598.535	Point 9	318.397	392.835	596.195	no cnx
2019_05_29_exp1_TH	1	pyramidal	2	148	598.535	Point 8	379.52	399.074	596.195	no cnx
2019_05_29_exp1_TH	1	pyramidal	2	148	598.535	Point 20	358.758	195.503	614.105	no cnx
2019_05_29_exp1_TH	1	pyramidal	2	148	598.535	Point 21	394.644	269.171	614.105	no cnx
2019_05_29_exp1_TH	1	pyramidal	2	148	598.535	Point 22	278.106	270.887	614.105	no cnx
2019_05_29_exp1_TH	1	pyramidal	2	148	598.535	Point 23	394.878	338.132	614.105	no cnx
2019_05_29_exp1_TH	1	pyramidal	2	148	598.535	Point 24	335.984	325.755	614.105	no cnx
2019_05_29_exp1_TH	0	pyramidal	2	217	592.615	Point 55	330.49	433.473	555.055	no cnx
2019_05_29_exp1_TH	0	pyramidal	2	217	592.615	Point 54	483.144	491.035	555.055	no cnx
2019_05_29_exp1_TH	0	pyramidal	2	217	592.615	Point 56	357.223	345.493	555.055	no cnx
2019_05_29_exp1_TH	0	pyramidal	2	217	592.615	Point 51	526.67	374.137	555.055	no cnx
2019_05_29_exp1_TH	0	pyramidal	2	217	592.615	Point 50	623.172	347.895	555.055	no cnx
2019_05_29_exp1_TH	0	pyramidal	2	217	592.615	Point 53	470.351	366.381	555.055	no cnx
2019_05_29_exp1_TH	0	pyramidal	2	217	592.615	Point 52	505.101	478.296	555.055	no cnx
2019_05_29_exp1_TH	0	pyramidal	2	217	592.615	Point 11	424.343	375.019	596.195	no cnx
2019_05_29_exp1_TH	0	pyramidal	2	217	592.615	Point 10	315.271	298.968	596.195	no cnx
2019_05_29_exp1_TH	0	pyramidal	2	217	592.615	Point 13	353.043	259.704	596.195	no cnx
2019_05_29_exp1_TH	0	pyramidal	2	217	592.615	Point 12	359.516	411.607	596.195	no cnx
2019_05_29_exp1_TH	0	pyramidal	2	217	592.615	Point 15	467.611	202.238	596.195	no cnx
2019_05_29_exp1_TH	0	pyramidal	2	217	592.615	Point 14	341.636	395.551	596.195	no cnx
2019_05_29_exp1_TH	0	pyramidal	2	217	592.615	Point 17	301.498	153.614	614.105	no cnx
2019_05_29_exp1_TH	0	pyramidal	2	217	592.615	Point 16	284.719	312.948	596.195	no cnx
2019_05_29_exp1_TH	0	pyramidal	2	217	592.615	Point 19	404.36	70.4107	614.105	no cnx
2019_05_29_exp1_TH	0	pyramidal	2	217	592.615	Point 18	355.519	156.367	614.105	no cnx
2019_05_29_exp1_TH	0	pyramidal	2	217	592.615	Point 31	508.651	400.943	575.225	no cnx
2019_05_29_exp1_TH	0	pyramidal	2	217	592.615	Point 30	498.81	311.124	575.225	no cnx
2019_05_29_exp1_TH	0	pyramidal	2	217	592.615	Point 37	455.927	413.202	574.105	no cnx
2019_05_29_exp1_TH	0	pyramidal	2	217	592.615	Point 36	472.388	464.014	574.105	no cnx
2019_05_29_exp1_TH	0	pyramidal	2	217	592.615	Point 35	501.035	415.776	574.105	no cnx
2019_05_29_exp1_TH	0	pyramidal	2	217	592.615	Point 34	477.229	511.519	574.105	no cnx
2019_05_29_exp1_TH	0	pyramidal	2	217	592.615	Point 5	328.458	216.624	609.575	no cnx
2019_05_29_exp1_TH	0	pyramidal	2	217	592.615	Point 4	412.731	97.5951	609.575	no cnx
2019_05_29_exp1_TH	0	pyramidal	2	217	592.615	Point 7	343.116	345.166	596.195	no cnx
2019_05_29_exp1_TH	0	pyramidal	2	217	592.615	Point 6	519.242	165.875	609.575	no cnx
2019_05_29_exp1_TH	0	pyramidal	2	217	592.615	Point 1	340.004	168.26	609.575	no cnx
2019_05_29_exp1_TH	0	pyramidal	2	217	592.615	Point 3	386.456	40.9036	609.575	no cnx
2019_05_29_exp1_TH	0	pyramidal	2	217	592.615	Point 2	328.26	239.858	609.575	no cnx
2019_05_29_exp1_TH	0	pyramidal	2	217	592.615	Point 9	318.499	399.103	596.195	no cnx
2019_05_29_exp1_TH	0	pyramidal	2	217	592.615	Point 8	379.621	405.342	596.195	no cnx
2019_05_29_exp1_TH	0	pyramidal	2	217	592.615	Point 32	481.014	349.309	574.105	no cnx
2019_05_29_exp1_TH	0	pyramidal	2	217	592.615	Point 48	546.039	306.875	555.055	no cnx
2019_05_29_exp1_TH	0	pyramidal	2	217	592.615	Point 49	470.03	418.272	555.055	no cnx
2019_05_29_exp1_TH	0	pyramidal	2	217	592.615	Point 42	297.795	432.609	563.125	no cnx
2019_05_29_exp1_TH	0	pyramidal	2	217	592.615	Point 43	336.714	401.202	563.125	no cnx
2019_05_29_exp1_TH	0	pyramidal	2	217	592.615	Point 40	533.875	409.433	563.125	excitatory
2019_05_29_exp1_TH	0	pyramidal	2	217	592.615	Point 41	545.856	343.68	563.125	no cnx
2019_05_29_exp1_TH	0	pyramidal	2	217	592.615	Point 46	505.894	522.474	555.055	no cnx
2019_05_29_exp1_TH	0	pyramidal	2	217	592.615	Point 47	478.847	251.543	555.055	no cnx
2019_05_29_exp1_TH	0	pyramidal	2	217	592.615	Point 44	346.562	424.023	563.125	no cnx
2019_05_29_exp1_TH	0	pyramidal	2	217	592.615	Point 45	363.34	378.089	563.125	no cnx
2019_05_29_exp1_TH	0	pyramidal	2	217	592.615	Point 28	576.38	161.303	575.225	no cnx
2019_05_29_exp1_TH	0	pyramidal	2	217	592.615	Point 29	490.008	398.951	575.225	no cnx
2019_05_29_exp1_TH	0	pyramidal	2	217	592.615	Point 20	358.86	201.771	614.105	no cnx
2019_05_29_exp1_TH	0	pyramidal	2	217	592.615	Point 21	394.745	275.439	614.105	no cnx
2019_05_29_exp1_TH	0	pyramidal	2	217	592.615	Point 22	278.207	277.156	614.105	no cnx
2019_05_29_exp1_TH	0	pyramidal	2	217	592.615	Point 23	394.98	344.4	614.105	no cnx
2019_05_29_exp1_TH	0	pyramidal	2	217	592.615	Point 24	336.086	332.023	614.105	no cnx
2019_05_29_exp1_TH	0	pyramidal	2	217	592.615	Point 25	552.168	138.121	575.225	no cnx
2019_05_29_exp1_TH	0	pyramidal	2	217	592.615	Point 26	540.649	343.723	575.225	no cnx
2019_05_29_exp1_TH	0	pyramidal	2	217	592.615	Point 27	502.881	113.42	575.225	no cnx
2019_05_29_exp1_TH	0	pyramidal	2	217	592.615	Point 39	477.755	319.378	563.125	no cnx
2019_05_29_exp1_TH	0	pyramidal	2	217	592.615	Point 33	485.784	451.781	574.105	no cnx
2019_05_29_exp1_TH	0	pyramidal	2	217	592.615	Point 38	483.768	543.858	574.105	no cnx
2019_04_05_exp2_TH	3	pyramidal	2	224	112.345	Point 11	648.245	181.056	150.755	no cnx
2019_04_05_exp2_TH	3	pyramidal	2	224	112.345	Point 10	616.473	97.5727	150.755	no cnx
2019_04_05_exp2_TH	3	pyramidal	2	224	112.345	Point 13	560.607	30.0196	143.985	no cnx
2019_04_05_exp2_TH	3	pyramidal	2	224	112.345	Point 12	580.797	109.979	150.755	no cnx
2019_04_05_exp2_TH	3	pyramidal	2	224	112.345	Point 15	537.407	33.7436	143.985	no cnx
2019_04_05_exp2_TH	3	pyramidal	2	224	112.345	Point 14	585.216	136.765	143.985	no cnx
2019_04_05_exp2_TH	3	pyramidal	2	224	112.345	Point 17	545.063	50.5606	143.985	no cnx
2019_04_05_exp2_TH	3	pyramidal	2	224	112.345	Point 16	567.025	286.658	143.985	no cnx
2019_04_05_exp2_TH	3	pyramidal	2	224	112.345	Point 19	524.924	216.056	132.975	excitatory
2019_04_05_exp2_TH	3	pyramidal	2	224	112.345	Point 18	543.67	246.303	143.985	no cnx
2019_04_05_exp2_TH	3	pyramidal	2	224	112.345	Point 31	534.541	243.475	147.305	no cnx
2019_04_05_exp2_TH	3	pyramidal	2	224	112.345	Point 30	539.53	317.133	153.915	no cnx
2019_04_05_exp2_TH	3	pyramidal	2	224	112.345	Point 37	664.9	261.813	147.305	no cnx
2019_04_05_exp2_TH	3	pyramidal	2	224	112.345	Point 36	594.133	301.388	147.305	no cnx
2019_04_05_exp2_TH	3	pyramidal	2	224	112.345	Point 35	673.35	180.122	156.075	excitatory
2019_04_05_exp2_TH	3	pyramidal	2	224	112.345	Point 34	511.205	275.01	147.305	no cnx
2019_04_05_exp2_TH	3	pyramidal	2	224	112.345	Point 5	347.34	210.843	133.935	no cnx
2019_04_05_exp2_TH	3	pyramidal	2	224	112.345	Point 4	391.221	-3.17918	133.935	no cnx
2019_04_05_exp2_TH	3	pyramidal	2	224	112.345	Point 7	562.378	108.142	150.755	no cnx
2019_04_05_exp2_TH	3	pyramidal	2	224	112.345	Point 6	402.557	252.777	133.935	no cnx
2019_04_05_exp2_TH	3	pyramidal	2	224	112.345	Point 1	405.593	106.015	133.935	no cnx
2019_04_05_exp2_TH	3	pyramidal	2	224	112.345	Point 3	391.719	28.7201	133.935	no cnx
2019_04_05_exp2_TH	3	pyramidal	2	224	112.345	Point 2	347.75	36.827	133.935	no cnx
2019_04_05_exp2_TH	3	pyramidal	2	224	112.345	Point 9	551.011	132.65	150.755	no cnx
2019_04_05_exp2_TH	3	pyramidal	2	224	112.345	Point 8	653.401	191.122	150.755	no cnx
2019_04_05_exp2_TH	3	pyramidal	2	224	112.345	Point 32	557.521	282.334	147.305	no cnx
2019_04_05_exp2_TH	3	pyramidal	2	224	112.345	Point 42	354.911	303.518	152.895	no cnx
2019_04_05_exp2_TH	3	pyramidal	2	224	112.345	Point 43	414.064	279.717	152.895	no cnx
2019_04_05_exp2_TH	3	pyramidal	2	224	112.345	Point 40	379.361	308.383	152.895	no cnx
2019_04_05_exp2_TH	3	pyramidal	2	224	112.345	Point 41	350.901	192.919	152.895	no cnx
2019_04_05_exp2_TH	3	pyramidal	2	224	112.345	Point 44	399.948	202.104	152.895	no cnx
2019_04_05_exp2_TH	3	pyramidal	2	224	112.345	Point 28	543.939	289.609	153.915	no cnx
2019_04_05_exp2_TH	3	pyramidal	2	224	112.345	Point 29	577.545	253.893	153.915	no cnx
2019_04_05_exp2_TH	3	pyramidal	2	224	112.345	Point 20	431.36	118.422	132.975	no cnx
2019_04_05_exp2_TH	3	pyramidal	2	224	112.345	Point 21	385.023	62.5219	132.975	no cnx
2019_04_05_exp2_TH	3	pyramidal	2	224	112.345	Point 22	540.143	208.577	132.975	no cnx
2019_04_05_exp2_TH	3	pyramidal	2	224	112.345	Point 23	559.927	74.4279	132.975	no cnx
2019_04_05_exp2_TH	3	pyramidal	2	224	112.345	Point 24	400.303	141.48	132.975	no cnx
2019_04_05_exp2_TH	3	pyramidal	2	224	112.345	Point 25	516.827	210.898	132.975	no cnx
2019_04_05_exp2_TH	3	pyramidal	2	224	112.345	Point 26	707.053	206.296	153.915	no cnx
2019_04_05_exp2_TH	3	pyramidal	2	224	112.345	Point 27	606.625	199.546	153.915	no cnx
2019_04_05_exp2_TH	3	pyramidal	2	224	112.345	Point 39	256.079	203.545	152.895	no cnx
2019_04_05_exp2_TH	3	pyramidal	2	224	112.345	Point 33	608.81	353.228	147.305	no cnx
2019_04_05_exp2_TH	3	pyramidal	2	224	112.345	Point 38	365.936	314.703	152.895	no cnx
2019_04_05_exp2_TH	2	pyramidal	2	206	101.785	Point 11	653.842	104.365	150.755	no cnx
2019_04_05_exp2_TH	2	pyramidal	2	206	101.785	Point 10	622.07	20.8826	150.755	no cnx
2019_04_05_exp2_TH	2	pyramidal	2	206	101.785	Point 13	566.204	-46.6704	143.985	no cnx
2019_04_05_exp2_TH	2	pyramidal	2	206	101.785	Point 12	586.394	33.2886	150.755	no cnx
2019_04_05_exp2_TH	2	pyramidal	2	206	101.785	Point 15	543.004	-42.9464	143.985	no cnx
2019_04_05_exp2_TH	2	pyramidal	2	206	101.785	Point 14	590.812	60.075	143.985	no cnx
2019_04_05_exp2_TH	2	pyramidal	2	206	101.785	Point 17	550.659	-26.1294	143.985	no cnx
2019_04_05_exp2_TH	2	pyramidal	2	206	101.785	Point 16	572.622	209.968	143.985	no cnx
2019_04_05_exp2_TH	2	pyramidal	2	206	101.785	Point 19	530.521	139.366	132.975	excitatory
2019_04_05_exp2_TH	2	pyramidal	2	206	101.785	Point 18	549.267	169.613	143.985	no cnx
2019_04_05_exp2_TH	2	pyramidal	2	206	101.785	Point 31	540.138	166.784	147.305	no cnx
2019_04_05_exp2_TH	2	pyramidal	2	206	101.785	Point 30	545.127	240.443	153.915	no cnx
2019_04_05_exp2_TH	2	pyramidal	2	206	101.785	Point 37	670.497	185.123	147.305	no cnx
2019_04_05_exp2_TH	2	pyramidal	2	206	101.785	Point 36	599.729	224.698	147.305	no cnx
2019_04_05_exp2_TH	2	pyramidal	2	206	101.785	Point 35	678.947	103.432	156.075	no cnx
2019_04_05_exp2_TH	2	pyramidal	2	206	101.785	Point 34	516.802	198.32	147.305	no cnx
2019_04_05_exp2_TH	2	pyramidal	2	206	101.785	Point 5	352.936	134.153	133.935	no cnx
2019_04_05_exp2_TH	2	pyramidal	2	206	101.785	Point 4	396.818	-79.8692	133.935	no cnx
2019_04_05_exp2_TH	2	pyramidal	2	206	101.785	Point 7	567.975	31.4524	150.755	no cnx
2019_04_05_exp2_TH	2	pyramidal	2	206	101.785	Point 6	408.153	176.087	133.935	no cnx
2019_04_05_exp2_TH	2	pyramidal	2	206	101.785	Point 1	411.19	29.3252	133.935	no cnx
2019_04_05_exp2_TH	2	pyramidal	2	206	101.785	Point 3	397.315	-47.9699	133.935	no cnx
2019_04_05_exp2_TH	2	pyramidal	2	206	101.785	Point 2	353.347	-39.8631	133.935	no cnx
2019_04_05_exp2_TH	2	pyramidal	2	206	101.785	Point 9	556.608	55.9598	150.755	no cnx
2019_04_05_exp2_TH	2	pyramidal	2	206	101.785	Point 8	658.997	114.432	150.755	no cnx
2019_04_05_exp2_TH	2	pyramidal	2	206	101.785	Point 32	563.118	205.644	147.305	no cnx
2019_04_05_exp2_TH	2	pyramidal	2	206	101.785	Point 42	360.507	226.828	152.895	no cnx
2019_04_05_exp2_TH	2	pyramidal	2	206	101.785	Point 43	419.661	203.027	152.895	no cnx
2019_04_05_exp2_TH	2	pyramidal	2	206	101.785	Point 40	384.957	231.693	152.895	no cnx
2019_04_05_exp2_TH	2	pyramidal	2	206	101.785	Point 41	356.498	116.229	152.895	no cnx
2019_04_05_exp2_TH	2	pyramidal	2	206	101.785	Point 44	405.545	125.414	152.895	no cnx
2019_04_05_exp2_TH	2	pyramidal	2	206	101.785	Point 28	549.536	212.919	153.915	no cnx
2019_04_05_exp2_TH	2	pyramidal	2	206	101.785	Point 29	583.142	177.203	153.915	no cnx
2019_04_05_exp2_TH	2	pyramidal	2	206	101.785	Point 20	436.957	41.7324	132.975	no cnx
2019_04_05_exp2_TH	2	pyramidal	2	206	101.785	Point 21	390.62	-14.1682	132.975	no cnx
2019_04_05_exp2_TH	2	pyramidal	2	206	101.785	Point 22	545.74	131.887	132.975	no cnx
2019_04_05_exp2_TH	2	pyramidal	2	206	101.785	Point 23	565.524	-2.26215	132.975	excitatory
2019_04_05_exp2_TH	2	pyramidal	2	206	101.785	Point 24	405.9	64.7902	132.975	no cnx
2019_04_05_exp2_TH	2	pyramidal	2	206	101.785	Point 25	522.424	134.208	132.975	no cnx
2019_04_05_exp2_TH	2	pyramidal	2	206	101.785	Point 26	712.649	129.606	153.915	no cnx
2019_04_05_exp2_TH	2	pyramidal	2	206	101.785	Point 27	612.222	122.856	153.915	no cnx
2019_04_05_exp2_TH	2	pyramidal	2	206	101.785	Point 39	261.676	126.855	152.895	no cnx
2019_04_05_exp2_TH	2	pyramidal	2	206	101.785	Point 33	614.407	276.538	147.305	no cnx
2019_04_05_exp2_TH	2	pyramidal	2	206	101.785	Point 38	371.533	238.013	152.895	no cnx
2019_04_05_exp2_TH	1	pyramidal	2	152	143.715	Point 11	645.883	-8.78255	150.755	no cnx
2019_04_05_exp2_TH	1	pyramidal	2	152	143.715	Point 10	614.111	-92.2654	150.755	no cnx
2019_04_05_exp2_TH	1	pyramidal	2	152	143.715	Point 13	558.245	-159.818	143.985	no cnx
2019_04_05_exp2_TH	1	pyramidal	2	152	143.715	Point 12	578.435	-79.8594	150.755	no cnx
2019_04_05_exp2_TH	1	pyramidal	2	152	143.715	Point 15	535.045	-156.094	143.985	no cnx
2019_04_05_exp2_TH	1	pyramidal	2	152	143.715	Point 14	582.853	-53.073	143.985	no cnx
2019_04_05_exp2_TH	1	pyramidal	2	152	143.715	Point 17	542.7	-139.277	143.985	no cnx
2019_04_05_exp2_TH	1	pyramidal	2	152	143.715	Point 16	564.663	96.8197	143.985	no cnx
2019_04_05_exp2_TH	1	pyramidal	2	152	143.715	Point 19	522.561	26.2177	132.975	no cnx
2019_04_05_exp2_TH	1	pyramidal	2	152	143.715	Point 18	541.308	56.4645	143.985	no cnx
2019_04_05_exp2_TH	1	pyramidal	2	152	143.715	Point 31	532.179	53.6365	147.305	no cnx
2019_04_05_exp2_TH	1	pyramidal	2	152	143.715	Point 30	537.168	127.295	153.915	no cnx
2019_04_05_exp2_TH	1	pyramidal	2	152	143.715	Point 36	591.77	111.55	147.305	no cnx
2019_04_05_exp2_TH	1	pyramidal	2	152	143.715	Point 35	670.988	-9.71631	156.075	no cnx
2019_04_05_exp2_TH	1	pyramidal	2	152	143.715	Point 34	508.843	85.1721	147.305	no cnx
2019_04_05_exp2_TH	1	pyramidal	2	152	143.715	Point 5	344.977	21.0051	133.935	no cnx
2019_04_05_exp2_TH	1	pyramidal	2	152	143.715	Point 4	388.859	-193.017	133.935	no cnx
2019_04_05_exp2_TH	1	pyramidal	2	152	143.715	Point 7	560.016	-81.6956	150.755	no cnx
2019_04_05_exp2_TH	1	pyramidal	2	152	143.715	Point 6	400.194	62.9391	133.935	no cnx
2019_04_05_exp2_TH	1	pyramidal	2	152	143.715	Point 1	403.231	-83.8228	133.935	no cnx
2019_04_05_exp2_TH	1	pyramidal	2	152	143.715	Point 3	389.356	-161.118	133.935	no cnx
2019_04_05_exp2_TH	1	pyramidal	2	152	143.715	Point 2	345.388	-153.011	133.935	no cnx
2019_04_05_exp2_TH	1	pyramidal	2	152	143.715	Point 9	548.649	-57.1882	150.755	no cnx
2019_04_05_exp2_TH	1	pyramidal	2	152	143.715	Point 8	651.038	1.28376	150.755	no cnx
2019_04_05_exp2_TH	1	pyramidal	2	152	143.715	Point 32	555.159	92.4955	147.305	no cnx
2019_04_05_exp2_TH	1	pyramidal	2	152	143.715	Point 28	541.577	99.7709	153.915	no cnx
2019_04_05_exp2_TH	1	pyramidal	2	152	143.715	Point 29	575.183	64.0549	153.915	no cnx
2019_04_05_exp2_TH	1	pyramidal	2	152	143.715	Point 20	428.998	-71.4156	132.975	no cnx
2019_04_05_exp2_TH	1	pyramidal	2	152	143.715	Point 21	382.661	-127.316	132.975	no cnx
2019_04_05_exp2_TH	1	pyramidal	2	152	143.715	Point 22	537.781	18.739	132.975	no cnx
2019_04_05_exp2_TH	1	pyramidal	2	152	143.715	Point 23	557.565	-115.41	132.975	no cnx
2019_04_05_exp2_TH	1	pyramidal	2	152	143.715	Point 24	397.941	-48.3578	132.975	no cnx
2019_04_05_exp2_TH	1	pyramidal	2	152	143.715	Point 25	514.464	21.0599	132.975	no cnx
2019_04_05_exp2_TH	1	pyramidal	2	152	143.715	Point 26	704.69	16.4581	153.915	no cnx
2019_04_05_exp2_TH	1	pyramidal	2	152	143.715	Point 27	604.263	9.70768	153.915	no cnx
2019_04_05_exp2_TH	1	pyramidal	2	152	143.715	Point 33	606.448	163.39	147.305	no cnx
2019_04_05_exp2_TH	0	pyramidal	2	185	114.245	Point 11	652.506	-76.0409	150.755	no cnx
2019_04_05_exp2_TH	0	pyramidal	2	185	114.245	Point 10	620.734	-159.524	150.755	no cnx
2019_04_05_exp2_TH	0	pyramidal	2	185	114.245	Point 13	564.868	-227.077	143.985	no cnx
2019_04_05_exp2_TH	0	pyramidal	2	185	114.245	Point 12	585.058	-147.118	150.755	no cnx
2019_04_05_exp2_TH	0	pyramidal	2	185	114.245	Point 15	541.668	-223.353	143.985	no cnx
2019_04_05_exp2_TH	0	pyramidal	2	185	114.245	Point 14	589.476	-120.331	143.985	excitatory
2019_04_05_exp2_TH	0	pyramidal	2	185	114.245	Point 17	549.323	-206.536	143.985	no cnx
2019_04_05_exp2_TH	0	pyramidal	2	185	114.245	Point 16	571.286	29.5613	143.985	no cnx
2019_04_05_exp2_TH	0	pyramidal	2	185	114.245	Point 19	529.184	-41.0406	132.975	excitatory
2019_04_05_exp2_TH	0	pyramidal	2	185	114.245	Point 18	547.931	-10.7938	143.985	no cnx
2019_04_05_exp2_TH	0	pyramidal	2	185	114.245	Point 31	538.802	-13.6219	147.305	no cnx
2019_04_05_exp2_TH	0	pyramidal	2	185	114.245	Point 30	543.791	60.0369	153.915	no cnx
2019_04_05_exp2_TH	0	pyramidal	2	185	114.245	Point 37	669.161	4.71669	147.305	no cnx
2019_04_05_exp2_TH	0	pyramidal	2	185	114.245	Point 36	598.393	44.2915	147.305	excitatory
2019_04_05_exp2_TH	0	pyramidal	2	185	114.245	Point 35	677.611	-76.9747	156.075	no cnx
2019_04_05_exp2_TH	0	pyramidal	2	185	114.245	Point 34	515.466	17.9137	147.305	no cnx
2019_04_05_exp2_TH	0	pyramidal	2	185	114.245	Point 5	351.6	-46.2533	133.935	no cnx
2019_04_05_exp2_TH	0	pyramidal	2	185	114.245	Point 4	395.482	-260.276	133.935	no cnx
2019_04_05_exp2_TH	0	pyramidal	2	185	114.245	Point 7	566.639	-148.954	150.755	no cnx
2019_04_05_exp2_TH	0	pyramidal	2	185	114.245	Point 6	406.817	-4.31921	133.935	no cnx
2019_04_05_exp2_TH	0	pyramidal	2	185	114.245	Point 1	409.854	-151.081	133.935	no cnx
2019_04_05_exp2_TH	0	pyramidal	2	185	114.245	Point 3	395.979	-228.376	133.935	no cnx
2019_04_05_exp2_TH	0	pyramidal	2	185	114.245	Point 2	352.011	-220.269	133.935	no cnx
2019_04_05_exp2_TH	0	pyramidal	2	185	114.245	Point 9	555.272	-124.447	150.755	no cnx
2019_04_05_exp2_TH	0	pyramidal	2	185	114.245	Point 8	657.661	-65.9746	150.755	no cnx
2019_04_05_exp2_TH	0	pyramidal	2	185	114.245	Point 32	561.782	25.2372	147.305	no cnx
2019_04_05_exp2_TH	0	pyramidal	2	185	114.245	Point 42	359.171	46.4213	152.895	no cnx
2019_04_05_exp2_TH	0	pyramidal	2	185	114.245	Point 43	418.325	22.6206	152.895	no cnx
2019_04_05_exp2_TH	0	pyramidal	2	185	114.245	Point 40	383.621	51.2868	152.895	no cnx
2019_04_05_exp2_TH	0	pyramidal	2	185	114.245	Point 41	355.161	-64.1774	152.895	no cnx
2019_04_05_exp2_TH	0	pyramidal	2	185	114.245	Point 44	404.209	-54.992	152.895	no cnx
2019_04_05_exp2_TH	0	pyramidal	2	185	114.245	Point 28	548.2	32.5125	153.915	no cnx
2019_04_05_exp2_TH	0	pyramidal	2	185	114.245	Point 29	581.806	-3.20345	153.915	no cnx
2019_04_05_exp2_TH	0	pyramidal	2	185	114.245	Point 20	435.621	-138.674	132.975	no cnx
2019_04_05_exp2_TH	0	pyramidal	2	185	114.245	Point 21	389.284	-194.575	132.975	no cnx
2019_04_05_exp2_TH	0	pyramidal	2	185	114.245	Point 22	544.404	-48.5193	132.975	no cnx
2019_04_05_exp2_TH	0	pyramidal	2	185	114.245	Point 23	564.188	-182.669	132.975	no cnx
2019_04_05_exp2_TH	0	pyramidal	2	185	114.245	Point 24	404.564	-115.616	132.975	no cnx
2019_04_05_exp2_TH	0	pyramidal	2	185	114.245	Point 25	521.087	-46.1984	132.975	no cnx
2019_04_05_exp2_TH	0	pyramidal	2	185	114.245	Point 26	711.313	-50.8003	153.915	no cnx
2019_04_05_exp2_TH	0	pyramidal	2	185	114.245	Point 27	610.886	-57.5507	153.915	no cnx
2019_04_05_exp2_TH	0	pyramidal	2	185	114.245	Point 39	260.34	-53.5517	152.895	no cnx
2019_04_05_exp2_TH	0	pyramidal	2	185	114.245	Point 33	613.071	96.1313	147.305	no cnx
2019_04_05_exp2_TH	0	pyramidal	2	185	114.245	Point 38	370.197	57.6064	152.895	excitatory
2019_04_05_exp1_TH	2	pyramidal	2	177	171.915	Point 11	552.068	21.8606	164.805	no cnx
2019_04_05_exp1_TH	2	pyramidal	2	177	171.915	Point 10	341.609	-111.634	164.805	no cnx
2019_04_05_exp1_TH	2	pyramidal	2	177	171.915	Point 13	509.433	-64.9408	171.915	no cnx
2019_04_05_exp1_TH	2	pyramidal	2	177	171.915	Point 12	348.523	-27.0797	164.805	no cnx
2019_04_05_exp1_TH	2	pyramidal	2	177	171.915	Point 15	514.512	2.44019	168.935	no cnx
2019_04_05_exp1_TH	2	pyramidal	2	177	171.915	Point 14	326.188	44.073	168.935	no cnx
2019_04_05_exp1_TH	2	pyramidal	2	177	171.915	Point 17	506.27	178.098	168.935	no cnx
2019_04_05_exp1_TH	2	pyramidal	2	177	171.915	Point 16	345.031	107.279	168.935	no cnx
2019_04_05_exp1_TH	2	pyramidal	2	177	171.915	Point 19	406.279	84.9677	168.935	no cnx
2019_04_05_exp1_TH	2	pyramidal	2	177	171.915	Point 18	408.427	114.654	168.935	no cnx
2019_04_05_exp1_TH	2	pyramidal	2	177	171.915	Point 31	524.986	63.759	187.105	no cnx
2019_04_05_exp1_TH	2	pyramidal	2	177	171.915	Point 30	535.363	-74.8505	198.945	no cnx
2019_04_05_exp1_TH	2	pyramidal	2	177	171.915	Point 37	524.711	-134.996	175.045	no cnx
2019_04_05_exp1_TH	2	pyramidal	2	177	171.915	Point 36	532.612	61.4609	187.105	no cnx
2019_04_05_exp1_TH	2	pyramidal	2	177	171.915	Point 35	551.368	106.534	187.105	no cnx
2019_04_05_exp1_TH	2	pyramidal	2	177	171.915	Point 34	356.527	30.9272	187.105	no cnx
2019_04_05_exp1_TH	2	pyramidal	2	177	171.915	Point 5	362.413	-43.6184	174.755	no cnx
2019_04_05_exp1_TH	2	pyramidal	2	177	171.915	Point 4	340.704	-46.3086	174.755	no cnx
2019_04_05_exp1_TH	2	pyramidal	2	177	171.915	Point 7	352.075	-157.701	164.805	no cnx
2019_04_05_exp1_TH	2	pyramidal	2	177	171.915	Point 6	539.38	-60.3215	174.755	no cnx
2019_04_05_exp1_TH	2	pyramidal	2	177	171.915	Point 1	321.827	-104.766	174.755	no cnx
2019_04_05_exp1_TH	2	pyramidal	2	177	171.915	Point 3	501.805	-35.2016	174.755	no cnx
2019_04_05_exp1_TH	2	pyramidal	2	177	171.915	Point 2	376.268	33.6704	174.755	no cnx
2019_04_05_exp1_TH	2	pyramidal	2	177	171.915	Point 9	340.927	30.1948	164.805	no cnx
2019_04_05_exp1_TH	2	pyramidal	2	177	171.915	Point 8	530.632	-8.20188	164.805	no cnx
2019_04_05_exp1_TH	2	pyramidal	2	177	171.915	Point 32	510.945	31.9756	187.105	no cnx
2019_04_05_exp1_TH	2	pyramidal	2	177	171.915	Point 40	478.766	60.3031	175.045	excitatory
2019_04_05_exp1_TH	2	pyramidal	2	177	171.915	Point 41	571.168	74.5204	175.045	no cnx
2019_04_05_exp1_TH	2	pyramidal	2	177	171.915	Point 28	545.745	7.74582	198.945	excitatory
2019_04_05_exp1_TH	2	pyramidal	2	177	171.915	Point 29	499.338	-6.87886	198.945	no cnx
2019_04_05_exp1_TH	2	pyramidal	2	177	171.915	Point 20	410.557	54.5895	171.915	no cnx
2019_04_05_exp1_TH	2	pyramidal	2	177	171.915	Point 21	375.553	-28.6748	171.915	no cnx
2019_04_05_exp1_TH	2	pyramidal	2	177	171.915	Point 22	497.408	117.001	171.915	no cnx
2019_04_05_exp1_TH	2	pyramidal	2	177	171.915	Point 23	518.561	168.427	171.915	no cnx
2019_04_05_exp1_TH	2	pyramidal	2	177	171.915	Point 24	481.497	102.584	198.945	no cnx
2019_04_05_exp1_TH	2	pyramidal	2	177	171.915	Point 25	545.539	-8.42405	198.945	no cnx
2019_04_05_exp1_TH	2	pyramidal	2	177	171.915	Point 26	603.195	-23.4646	198.945	no cnx
2019_04_05_exp1_TH	2	pyramidal	2	177	171.915	Point 27	497.471	79.5098	198.945	no cnx
2019_04_05_exp1_TH	2	pyramidal	2	177	171.915	Point 39	579.56	85.8612	175.045	excitatory
2019_04_05_exp1_TH	2	pyramidal	2	177	171.915	Point 33	495.854	-142.332	187.105	no cnx
2019_04_05_exp1_TH	2	pyramidal	2	177	171.915	Point 38	545.746	32.4312	175.045	no cnx
2019_04_05_exp1_TH	0	pyramidal	2	220	191.725	Point 50	487.13	336.511	165.675	no cnx
2019_04_05_exp1_TH	0	pyramidal	2	220	191.725	Point 11	547.38	130.726	164.805	no cnx
2019_04_05_exp1_TH	0	pyramidal	2	220	191.725	Point 10	336.921	-2.76859	164.805	no cnx
2019_04_05_exp1_TH	0	pyramidal	2	220	191.725	Point 13	504.745	43.9247	171.915	no cnx
2019_04_05_exp1_TH	0	pyramidal	2	220	191.725	Point 12	343.835	81.7858	164.805	no cnx
2019_04_05_exp1_TH	0	pyramidal	2	220	191.725	Point 15	509.825	111.306	168.935	no cnx
2019_04_05_exp1_TH	0	pyramidal	2	220	191.725	Point 14	321.5	152.938	168.935	no cnx
2019_04_05_exp1_TH	0	pyramidal	2	220	191.725	Point 17	501.582	286.963	168.935	no cnx
2019_04_05_exp1_TH	0	pyramidal	2	220	191.725	Point 16	340.343	216.144	168.935	no cnx
2019_04_05_exp1_TH	0	pyramidal	2	220	191.725	Point 19	401.591	193.833	168.935	no cnx
2019_04_05_exp1_TH	0	pyramidal	2	220	191.725	Point 18	403.74	223.519	168.935	no cnx
2019_04_05_exp1_TH	0	pyramidal	2	220	191.725	Point 31	520.298	172.625	187.105	no cnx
2019_04_05_exp1_TH	0	pyramidal	2	220	191.725	Point 30	530.675	34.015	198.945	no cnx
2019_04_05_exp1_TH	0	pyramidal	2	220	191.725	Point 37	520.023	-26.1309	175.045	excitatory
2019_04_05_exp1_TH	0	pyramidal	2	220	191.725	Point 36	527.925	170.326	187.105	no cnx
2019_04_05_exp1_TH	0	pyramidal	2	220	191.725	Point 35	546.68	215.399	187.105	no cnx
2019_04_05_exp1_TH	0	pyramidal	2	220	191.725	Point 34	351.839	139.793	187.105	no cnx
2019_04_05_exp1_TH	0	pyramidal	2	220	191.725	Point 5	357.725	65.2471	174.755	no cnx
2019_04_05_exp1_TH	0	pyramidal	2	220	191.725	Point 4	336.016	62.557	174.755	no cnx
2019_04_05_exp1_TH	0	pyramidal	2	220	191.725	Point 7	347.388	-48.8355	164.805	no cnx
2019_04_05_exp1_TH	0	pyramidal	2	220	191.725	Point 6	534.692	48.544	174.755	no cnx
2019_04_05_exp1_TH	0	pyramidal	2	220	191.725	Point 1	317.139	4.09914	174.755	no cnx
2019_04_05_exp1_TH	0	pyramidal	2	220	191.725	Point 3	497.117	73.6639	174.755	no cnx
2019_04_05_exp1_TH	0	pyramidal	2	220	191.725	Point 2	371.581	142.536	174.755	no cnx
2019_04_05_exp1_TH	0	pyramidal	2	220	191.725	Point 9	336.239	139.06	164.805	no cnx
2019_04_05_exp1_TH	0	pyramidal	2	220	191.725	Point 8	525.944	100.664	164.805	no cnx
2019_04_05_exp1_TH	0	pyramidal	2	220	191.725	Point 32	506.257	140.841	187.105	no cnx
2019_04_05_exp1_TH	0	pyramidal	2	220	191.725	Point 48	374.602	228.147	165.675	no cnx
2019_04_05_exp1_TH	0	pyramidal	2	220	191.725	Point 49	537.091	295.24	165.675	no cnx
2019_04_05_exp1_TH	0	pyramidal	2	220	191.725	Point 42	515.264	115.604	165.675	no cnx
2019_04_05_exp1_TH	0	pyramidal	2	220	191.725	Point 43	518.315	196.018	165.675	no cnx
2019_04_05_exp1_TH	0	pyramidal	2	220	191.725	Point 40	474.079	169.169	175.045	no cnx
2019_04_05_exp1_TH	0	pyramidal	2	220	191.725	Point 41	566.48	183.386	175.045	no cnx
2019_04_05_exp1_TH	0	pyramidal	2	220	191.725	Point 46	503.248	227.317	165.675	no cnx
2019_04_05_exp1_TH	0	pyramidal	2	220	191.725	Point 47	496.028	312.12	165.675	no cnx
2019_04_05_exp1_TH	0	pyramidal	2	220	191.725	Point 44	568.332	259.943	165.675	no cnx
2019_04_05_exp1_TH	0	pyramidal	2	220	191.725	Point 45	527.772	184.877	165.675	no cnx
2019_04_05_exp1_TH	0	pyramidal	2	220	191.725	Point 28	541.057	116.611	198.945	no cnx
2019_04_05_exp1_TH	0	pyramidal	2	220	191.725	Point 29	494.65	101.987	198.945	no cnx
2019_04_05_exp1_TH	0	pyramidal	2	220	191.725	Point 20	405.869	163.455	171.915	no cnx
2019_04_05_exp1_TH	0	pyramidal	2	220	191.725	Point 21	370.865	80.1908	171.915	no cnx
2019_04_05_exp1_TH	0	pyramidal	2	220	191.725	Point 22	492.72	225.867	171.915	no cnx
2019_04_05_exp1_TH	0	pyramidal	2	220	191.725	Point 23	513.873	277.292	171.915	no cnx
2019_04_05_exp1_TH	0	pyramidal	2	220	191.725	Point 24	476.809	211.45	198.945	no cnx
2019_04_05_exp1_TH	0	pyramidal	2	220	191.725	Point 25	540.851	100.441	198.945	no cnx
2019_04_05_exp1_TH	0	pyramidal	2	220	191.725	Point 26	598.508	85.401	198.945	no cnx
2019_04_05_exp1_TH	0	pyramidal	2	220	191.725	Point 27	492.784	188.375	198.945	no cnx
2019_04_05_exp1_TH	0	pyramidal	2	220	191.725	Point 39	574.873	194.727	175.045	no cnx
2019_04_05_exp1_TH	0	pyramidal	2	220	191.725	Point 33	491.167	-33.467	187.105	no cnx
2019_04_05_exp1_TH	0	pyramidal	2	220	191.725	Point 38	541.058	141.297	175.045	no cnx
2019_03_20_exp1_TH	3	pyramidal	2	130	12.4951	Point 11	236.795	-206.799	34.585	no cnx
2019_03_20_exp1_TH	3	pyramidal	2	130	12.4951	Point 10	381.713	-198.112	34.585	no cnx
2019_03_20_exp1_TH	3	pyramidal	2	130	12.4951	Point 12	312.718	-158.262	34.585	excitatory
2019_03_20_exp1_TH	3	pyramidal	2	130	12.4951	Point 5	272.642	-93.4542	34.585	no cnx
2019_03_20_exp1_TH	3	pyramidal	2	130	12.4951	Point 4	222.53	-228.946	34.585	no cnx
2019_03_20_exp1_TH	3	pyramidal	2	130	12.4951	Point 7	207.763	-70.7881	34.585	no cnx
2019_03_20_exp1_TH	3	pyramidal	2	130	12.4951	Point 6	206.779	-54.6394	34.585	no cnx
2019_03_20_exp1_TH	3	pyramidal	2	130	12.4951	Point 1	193.167	-108.156	34.585	no cnx
2019_03_20_exp1_TH	3	pyramidal	2	130	12.4951	Point 3	318.564	-241.493	34.585	excitatory
2019_03_20_exp1_TH	3	pyramidal	2	130	12.4951	Point 2	273.986	-195.069	34.585	no cnx
2019_03_20_exp1_TH	3	pyramidal	2	130	12.4951	Point 9	321.536	-68.5913	34.585	no cnx
2019_03_20_exp1_TH	3	pyramidal	2	130	12.4951	Point 8	259.742	-60.1784	34.585	no cnx
2019_03_20_exp1_TH	2	pyramidal	2	141	-7.44499	Point 51	382.334	-128.776	22.805	no cnx
2019_03_20_exp1_TH	2	pyramidal	2	141	-7.44499	Point 50	381.294	110.405	22.805	no cnx
2019_03_20_exp1_TH	2	pyramidal	2	141	-7.44499	Point 53	358.585	-2.93147	22.805	no cnx
2019_03_20_exp1_TH	2	pyramidal	2	141	-7.44499	Point 52	200.466	-9.95772	22.805	no cnx
2019_03_20_exp1_TH	2	pyramidal	2	141	-7.44499	Point 11	243.955	-123.448	34.585	no cnx
2019_03_20_exp1_TH	2	pyramidal	2	141	-7.44499	Point 10	388.873	-114.76	34.585	no cnx
2019_03_20_exp1_TH	2	pyramidal	2	141	-7.44499	Point 13	241.065	-39.2032	34.585	no cnx
2019_03_20_exp1_TH	2	pyramidal	2	141	-7.44499	Point 12	319.878	-74.9101	34.585	no cnx
2019_03_20_exp1_TH	2	pyramidal	2	141	-7.44499	Point 15	275.091	3.4994	34.585	no cnx
2019_03_20_exp1_TH	2	pyramidal	2	141	-7.44499	Point 14	369.457	-5.27608	34.585	no cnx
2019_03_20_exp1_TH	2	pyramidal	2	141	-7.44499	Point 17	251.723	-87.0983	34.585	no cnx
2019_03_20_exp1_TH	2	pyramidal	2	141	-7.44499	Point 16	439.31	-89.824	34.585	no cnx
2019_03_20_exp1_TH	2	pyramidal	2	141	-7.44499	Point 19	270.316	-150.065	37.675	no cnx
2019_03_20_exp1_TH	2	pyramidal	2	141	-7.44499	Point 18	390.092	-76.4157	34.585	no cnx
2019_03_20_exp1_TH	2	pyramidal	2	141	-7.44499	Point 31	207.779	-3.66638	25.795	no cnx
2019_03_20_exp1_TH	2	pyramidal	2	141	-7.44499	Point 30	340.879	25.7295	25.795	no cnx
2019_03_20_exp1_TH	2	pyramidal	2	141	-7.44499	Point 37	363.564	-158.137	27.295	no cnx
2019_03_20_exp1_TH	2	pyramidal	2	141	-7.44499	Point 36	229.85	20.5228	27.295	no cnx
2019_03_20_exp1_TH	2	pyramidal	2	141	-7.44499	Point 35	439.805	22.2773	27.295	no cnx
2019_03_20_exp1_TH	2	pyramidal	2	141	-7.44499	Point 34	323.292	-33.7533	27.295	no cnx
2019_03_20_exp1_TH	2	pyramidal	2	141	-7.44499	Point 5	279.802	-10.1027	34.585	no cnx
2019_03_20_exp1_TH	2	pyramidal	2	141	-7.44499	Point 4	229.69	-145.594	34.585	no cnx
2019_03_20_exp1_TH	2	pyramidal	2	141	-7.44499	Point 7	214.923	12.5633	34.585	no cnx
2019_03_20_exp1_TH	2	pyramidal	2	141	-7.44499	Point 6	213.939	28.7121	34.585	excitatory
2019_03_20_exp1_TH	2	pyramidal	2	141	-7.44499	Point 1	200.327	-24.8043	34.585	no cnx
2019_03_20_exp1_TH	2	pyramidal	2	141	-7.44499	Point 3	325.724	-158.141	34.585	no cnx
2019_03_20_exp1_TH	2	pyramidal	2	141	-7.44499	Point 2	281.146	-111.718	34.585	no cnx
2019_03_20_exp1_TH	2	pyramidal	2	141	-7.44499	Point 9	328.696	14.7601	34.585	no cnx
2019_03_20_exp1_TH	2	pyramidal	2	141	-7.44499	Point 8	266.902	23.173	34.585	no cnx
2019_03_20_exp1_TH	2	pyramidal	2	141	-7.44499	Point 32	395.424	-109.177	25.795	no cnx
2019_03_20_exp1_TH	2	pyramidal	2	141	-7.44499	Point 48	263.98	-115.133	22.805	no cnx
2019_03_20_exp1_TH	2	pyramidal	2	141	-7.44499	Point 49	364.844	-61.3736	22.805	no cnx
2019_03_20_exp1_TH	2	pyramidal	2	141	-7.44499	Point 42	294.424	-50.3198	27.295	no cnx
2019_03_20_exp1_TH	2	pyramidal	2	141	-7.44499	Point 43	220.288	-148.118	27.295	no cnx
2019_03_20_exp1_TH	2	pyramidal	2	141	-7.44499	Point 40	252.843	47.4664	27.295	no cnx
2019_03_20_exp1_TH	2	pyramidal	2	141	-7.44499	Point 41	213.381	17.7351	27.295	inhibitory
2019_03_20_exp1_TH	2	pyramidal	2	141	-7.44499	Point 46	359.707	21.4145	27.295	no cnx
2019_03_20_exp1_TH	2	pyramidal	2	141	-7.44499	Point 47	177.982	48.5352	22.805	no cnx
2019_03_20_exp1_TH	2	pyramidal	2	141	-7.44499	Point 44	318.989	-130.382	27.295	excitatory
2019_03_20_exp1_TH	2	pyramidal	2	141	-7.44499	Point 45	396.831	-143.441	27.295	no cnx
2019_03_20_exp1_TH	2	pyramidal	2	141	-7.44499	Point 28	374.61	-28.7971	25.795	no cnx
2019_03_20_exp1_TH	2	pyramidal	2	141	-7.44499	Point 29	261.88	86.0919	25.795	no cnx
2019_03_20_exp1_TH	2	pyramidal	2	141	-7.44499	Point 20	354.925	-91.9088	37.675	no cnx
2019_03_20_exp1_TH	2	pyramidal	2	141	-7.44499	Point 21	402.101	-122.453	37.675	no cnx
2019_03_20_exp1_TH	2	pyramidal	2	141	-7.44499	Point 22	243.671	80.1484	37.675	excitatory
2019_03_20_exp1_TH	2	pyramidal	2	141	-7.44499	Point 23	265.225	-140.592	37.675	no cnx
2019_03_20_exp1_TH	2	pyramidal	2	141	-7.44499	Point 24	418.111	-70.2814	37.685	no cnx
2019_03_20_exp1_TH	2	pyramidal	2	141	-7.44499	Point 25	265.81	-37.2221	37.685	no cnx
2019_03_20_exp1_TH	2	pyramidal	2	141	-7.44499	Point 26	207.739	-69.519	25.795	no cnx
2019_03_20_exp1_TH	2	pyramidal	2	141	-7.44499	Point 27	256.099	-49.0362	25.795	no cnx
2019_03_20_exp1_TH	2	pyramidal	2	141	-7.44499	Point 33	234.628	-21.5549	27.295	no cnx
2019_03_20_exp1_TH	2	pyramidal	2	141	-7.44499	Point 38	251.183	-35.8788	27.295	no cnx

## Sheet: Fig4B_RorbAi_L23pyr
exp_id	headstage	post_class	post_layer	postPia	post_z	MP_ID	prePia	x_ap	pre_z	cnx
2020_08_14_exp2_TH	0	pyramidal	2	236	-170.886	Point 11	520.65	249.231	-192.036	no cnx
2020_08_14_exp2_TH	0	pyramidal	2	236	-170.886	Point 10	460.686	92.1225	-192.036	no cnx
2020_08_14_exp2_TH	0	pyramidal	2	236	-170.886	Point 13	614.371	140.969	-177.676	no cnx
2020_08_14_exp2_TH	0	pyramidal	2	236	-170.886	Point 12	637.198	101.384	-192.036	no cnx
2020_08_14_exp2_TH	0	pyramidal	2	236	-170.886	Point 15	353.875	3.50031	-118.916	no cnx
2020_08_14_exp2_TH	0	pyramidal	2	236	-170.886	Point 14	701.203	225.438	-177.656	no cnx
2020_08_14_exp2_TH	0	pyramidal	2	236	-170.886	Point 17	458.944	-72.3948	-132.516	no cnx
2020_08_14_exp2_TH	0	pyramidal	2	236	-170.886	Point 16	495.098	-77.879	-118.916	no cnx
2020_08_14_exp2_TH	0	pyramidal	2	236	-170.886	Point 19	496.02	-89.4311	-161.636	excitatory
2020_08_14_exp2_TH	0	pyramidal	2	236	-170.886	Point 18	360.208	-87.6284	-173.666	no cnx
2020_08_14_exp2_TH	0	pyramidal	2	236	-170.886	Point 5	479.633	169.34	-150.096	no cnx
2020_08_14_exp2_TH	0	pyramidal	2	236	-170.886	Point 4	445.988	141.934	-150.096	no cnx
2020_08_14_exp2_TH	0	pyramidal	2	236	-170.886	Point 7	391.005	167.56	-167.166	no cnx
2020_08_14_exp2_TH	0	pyramidal	2	236	-170.886	Point 6	436.14	126.09	-167.166	no cnx
2020_08_14_exp2_TH	0	pyramidal	2	236	-170.886	Point 1	410.145	104.516	-139.786	no cnx
2020_08_14_exp2_TH	0	pyramidal	2	236	-170.886	Point 3	420.448	99.1407	-145.866	excitatory
2020_08_14_exp2_TH	0	pyramidal	2	236	-170.886	Point 2	520.794	68.9027	-139.786	no cnx
2020_08_14_exp2_TH	0	pyramidal	2	236	-170.886	Point 9	416.698	164.82	-177.756	no cnx
2020_08_14_exp2_TH	0	pyramidal	2	236	-170.886	Point 8	355.59	174.498	-177.756	no cnx
2020_08_14_exp2_TH	0	pyramidal	2	236	-170.886	Point 20	526.92	-101.34	-173.666	no cnx
2020_08_14_exp2_TH	0	pyramidal	2	236	-170.886	Point 21	418.665	-81.2122	-202.396	no cnx
2020_08_14_exp2_TH	0	pyramidal	2	236	-170.886	Point 22	532.697	-60.7701	-202.396	no cnx
2020_08_14_exp1_TH	2	pyramidal	2	226	282.894	Point 11	353.737	78.8116	307.284	no cnx
2020_08_14_exp1_TH	2	pyramidal	2	226	282.894	Point 10	421.472	180.658	312.694	no cnx
2020_08_14_exp1_TH	2	pyramidal	2	226	282.894	Point 13	347.842	51.202	289.394	no cnx
2020_08_14_exp1_TH	2	pyramidal	2	226	282.894	Point 12	393.081	91.0089	289.394	no cnx
2020_08_14_exp1_TH	2	pyramidal	2	226	282.894	Point 15	282.277	108.082	289.394	no cnx
2020_08_14_exp1_TH	2	pyramidal	2	226	282.894	Point 14	395.942	57.0548	289.394	no cnx
2020_08_14_exp1_TH	2	pyramidal	2	226	282.894	Point 17	494.372	87.3874	376.624	no cnx
2020_08_14_exp1_TH	2	pyramidal	2	226	282.894	Point 16	559.238	116.103	336.124	no cnx
2020_08_14_exp1_TH	2	pyramidal	2	226	282.894	Point 19	554.916	-149.933	402.244	no cnx
2020_08_14_exp1_TH	2	pyramidal	2	226	282.894	Point 18	541.196	-62.4968	402.244	no cnx
2020_08_14_exp1_TH	2	pyramidal	2	226	282.894	Point 5	345.751	1.45211	337.114	no cnx
2020_08_14_exp1_TH	2	pyramidal	2	226	282.894	Point 4	466.017	54.0434	337.114	no cnx
2020_08_14_exp1_TH	2	pyramidal	2	226	282.894	Point 7	303.862	140.082	322.824	no cnx
2020_08_14_exp1_TH	2	pyramidal	2	226	282.894	Point 6	286.299	5.01242	337.114	no cnx
2020_08_14_exp1_TH	2	pyramidal	2	226	282.894	Point 1	352.785	-26.0173	350.874	no cnx
2020_08_14_exp1_TH	2	pyramidal	2	226	282.894	Point 3	391.137	4.42757	342.694	no cnx
2020_08_14_exp1_TH	2	pyramidal	2	226	282.894	Point 2	334.711	-41.4505	350.874	no cnx
2020_08_14_exp1_TH	2	pyramidal	2	226	282.894	Point 9	363.181	-40.9661	322.824	no cnx
2020_08_14_exp1_TH	2	pyramidal	2	226	282.894	Point 8	268.211	39.8917	322.824	no cnx
2020_08_14_exp1_TH	2	pyramidal	2	226	282.894	Point 20	684.757	-115.063	376.554	no cnx
2020_08_14_exp1_TH	2	pyramidal	2	226	282.894	Point 21	561.254	-155.166	376.554	no cnx
2020_08_14_exp1_TH	2	pyramidal	2	226	282.894	Point 22	372.529	-311.365	387.704	no cnx
2020_08_14_exp1_TH	2	pyramidal	2	226	282.894	Point 23	356.849	-328.564	371.374	no cnx
2020_08_14_exp1_TH	2	pyramidal	2	226	282.894	Point 24	397.79	-312.516	371.374	no cnx
2020_08_14_exp1_TH	2	pyramidal	2	226	282.894	Point 25	303.69	-279.289	344.604	no cnx
2020_08_14_exp1_TH	2	pyramidal	2	226	282.894	Point 26	343.019	-379.524	344.604	no cnx
2020_06_11_exp3_TH	3	pyramidal	2	227	-0.0861658	Point 11	398.33	-88.7203	37.684	no cnx
2020_06_11_exp3_TH	3	pyramidal	2	227	-0.0861658	Point 10	382.894	-266.544	24.604	no cnx
2020_06_11_exp3_TH	3	pyramidal	2	227	-0.0861658	Point 13	375.781	-90.6196	75.364	no cnx
2020_06_11_exp3_TH	3	pyramidal	2	227	-0.0861658	Point 12	445.367	-291.423	45.034	no cnx
2020_06_11_exp3_TH	3	pyramidal	2	227	-0.0861658	Point 15	706.885	75.3252	94.214	no cnx
2020_06_11_exp3_TH	3	pyramidal	2	227	-0.0861658	Point 14	681.47	9.7211	97.524	no cnx
2020_06_11_exp3_TH	3	pyramidal	2	227	-0.0861658	Point 17	692.171	-158.967	77.224	no cnx
2020_06_11_exp3_TH	3	pyramidal	2	227	-0.0861658	Point 16	697.767	-24.7216	82.664	no cnx
2020_06_11_exp3_TH	3	pyramidal	2	227	-0.0861658	Point 19	705.593	44.4332	49.024	no cnx
2020_06_11_exp3_TH	3	pyramidal	2	227	-0.0861658	Point 18	648.016	-128.088	66.934	no cnx
2020_06_11_exp3_TH	3	pyramidal	2	227	-0.0861658	Point 31	748.251	409.038	31.364	no cnx
2020_06_11_exp3_TH	3	pyramidal	2	227	-0.0861658	Point 30	612.678	335.494	41.234	no cnx
2020_06_11_exp3_TH	3	pyramidal	2	227	-0.0861658	Point 37	744.696	-556.786	107.514	no cnx
2020_06_11_exp3_TH	3	pyramidal	2	227	-0.0861658	Point 36	728.126	-398.252	107.514	no cnx
2020_06_11_exp3_TH	3	pyramidal	2	227	-0.0861658	Point 35	650.272	-339.609	108.584	no cnx
2020_06_11_exp3_TH	3	pyramidal	2	227	-0.0861658	Point 34	792.008	-265.056	108.584	no cnx
2020_06_11_exp3_TH	3	pyramidal	2	227	-0.0861658	Point 5	381.714	-35.3426	10.834	no cnx
2020_06_11_exp3_TH	3	pyramidal	2	227	-0.0861658	Point 4	401.317	193.629	10.834	no cnx
2020_06_11_exp3_TH	3	pyramidal	2	227	-0.0861658	Point 7	353.276	44.2475	-13.806	no cnx
2020_06_11_exp3_TH	3	pyramidal	2	227	-0.0861658	Point 6	382.848	180.231	-13.816	no cnx
2020_06_11_exp3_TH	3	pyramidal	2	227	-0.0861658	Point 1	392.973	56.4934	62.004	no cnx
2020_06_11_exp3_TH	3	pyramidal	2	227	-0.0861658	Point 3	372.05	-14.3805	16.304	no cnx
2020_06_11_exp3_TH	3	pyramidal	2	227	-0.0861658	Point 2	402.164	197.372	16.304	no cnx
2020_06_11_exp3_TH	3	pyramidal	2	227	-0.0861658	Point 9	476.212	-88.6345	24.604	no cnx
2020_06_11_exp3_TH	3	pyramidal	2	227	-0.0861658	Point 8	418.974	-136.51	-11.106	no cnx
2020_06_11_exp3_TH	3	pyramidal	2	227	-0.0861658	Point 32	785.336	-88.7129	59.134	no cnx
2020_06_11_exp3_TH	3	pyramidal	2	227	-0.0861658	Point 42	358.056	-65.2062	-24.656	no cnx
2020_06_11_exp3_TH	3	pyramidal	2	227	-0.0861658	Point 43	344.784	-3.15546	39.934	no cnx
2020_06_11_exp3_TH	3	pyramidal	2	227	-0.0861658	Point 40	624.661	-124.648	97.294	no cnx
2020_06_11_exp3_TH	3	pyramidal	2	227	-0.0861658	Point 41	620.947	-129.756	70.954	no cnx
2020_06_11_exp3_TH	3	pyramidal	2	227	-0.0861658	Point 44	186.468	74.955	31.094	no cnx
2020_06_11_exp3_TH	3	pyramidal	2	227	-0.0861658	Point 45	368.533	71.7422	89.544	no cnx
2020_06_11_exp3_TH	3	pyramidal	2	227	-0.0861658	Point 28	808.933	343.165	88.074	no cnx
2020_06_11_exp3_TH	3	pyramidal	2	227	-0.0861658	Point 29	760.019	315.718	53.054	no cnx
2020_06_11_exp3_TH	3	pyramidal	2	227	-0.0861658	Point 20	655.814	116.721	49.024	no cnx
2020_06_11_exp3_TH	3	pyramidal	2	227	-0.0861658	Point 21	637.452	124.619	49.024	no cnx
2020_06_11_exp3_TH	3	pyramidal	2	227	-0.0861658	Point 22	466.507	38.292	88.304	no cnx
2020_06_11_exp3_TH	3	pyramidal	2	227	-0.0861658	Point 23	373.507	375.919	16.874	no cnx
2020_06_11_exp3_TH	3	pyramidal	2	227	-0.0861658	Point 24	400.086	440.672	5.764	no cnx
2020_06_11_exp3_TH	3	pyramidal	2	227	-0.0861658	Point 25	722.285	519.064	59.044	no cnx
2020_06_11_exp3_TH	3	pyramidal	2	227	-0.0861658	Point 26	628.887	524.449	59.044	no cnx
2020_06_11_exp3_TH	3	pyramidal	2	227	-0.0861658	Point 27	636.154	449.772	45.264	no cnx
2020_06_11_exp3_TH	3	pyramidal	2	227	-0.0861658	Point 39	642.078	-353.808	97.294	no cnx
2020_06_11_exp3_TH	3	pyramidal	2	227	-0.0861658	Point 33	677.083	-156.408	98.184	no cnx
2020_06_11_exp3_TH	3	pyramidal	2	227	-0.0861658	Point 38	687.476	-496.586	107.514	no cnx
2020_06_11_exp3_TH	2	pyramidal	2	204	31.774	Point 11	404.062	-212.321	37.684	no cnx
2020_06_11_exp3_TH	2	pyramidal	2	204	31.774	Point 10	388.626	-390.145	24.604	no cnx
2020_06_11_exp3_TH	2	pyramidal	2	204	31.774	Point 13	381.513	-214.22	75.364	no cnx
2020_06_11_exp3_TH	2	pyramidal	2	204	31.774	Point 12	451.099	-415.024	45.034	no cnx
2020_06_11_exp3_TH	2	pyramidal	2	204	31.774	Point 15	712.617	-48.2756	94.214	no cnx
2020_06_11_exp3_TH	2	pyramidal	2	204	31.774	Point 14	687.202	-113.88	97.524	no cnx
2020_06_11_exp3_TH	2	pyramidal	2	204	31.774	Point 17	697.903	-282.568	77.224	no cnx
2020_06_11_exp3_TH	2	pyramidal	2	204	31.774	Point 16	703.499	-148.322	82.664	no cnx
2020_06_11_exp3_TH	2	pyramidal	2	204	31.774	Point 19	711.325	-79.1676	49.024	no cnx
2020_06_11_exp3_TH	2	pyramidal	2	204	31.774	Point 18	653.748	-251.689	66.934	no cnx
2020_06_11_exp3_TH	2	pyramidal	2	204	31.774	Point 31	753.983	285.437	31.364	no cnx
2020_06_11_exp3_TH	2	pyramidal	2	204	31.774	Point 30	618.41	211.893	41.234	no cnx
2020_06_11_exp3_TH	2	pyramidal	2	204	31.774	Point 37	750.428	-680.387	107.514	no cnx
2020_06_11_exp3_TH	2	pyramidal	2	204	31.774	Point 36	733.858	-521.853	107.514	no cnx
2020_06_11_exp3_TH	2	pyramidal	2	204	31.774	Point 35	656.004	-463.21	108.584	no cnx
2020_06_11_exp3_TH	2	pyramidal	2	204	31.774	Point 34	797.74	-388.656	108.584	no cnx
2020_06_11_exp3_TH	2	pyramidal	2	204	31.774	Point 5	387.446	-158.943	10.834	no cnx
2020_06_11_exp3_TH	2	pyramidal	2	204	31.774	Point 4	407.049	70.0287	10.834	no cnx
2020_06_11_exp3_TH	2	pyramidal	2	204	31.774	Point 7	359.008	-79.3533	-13.806	no cnx
2020_06_11_exp3_TH	2	pyramidal	2	204	31.774	Point 6	388.58	56.6299	-13.816	no cnx
2020_06_11_exp3_TH	2	pyramidal	2	204	31.774	Point 1	398.705	-67.1074	62.004	no cnx
2020_06_11_exp3_TH	2	pyramidal	2	204	31.774	Point 3	377.782	-137.981	16.304	no cnx
2020_06_11_exp3_TH	2	pyramidal	2	204	31.774	Point 2	407.896	73.7707	16.304	no cnx
2020_06_11_exp3_TH	2	pyramidal	2	204	31.774	Point 9	481.944	-212.235	24.604	no cnx
2020_06_11_exp3_TH	2	pyramidal	2	204	31.774	Point 8	424.706	-260.111	-11.106	no cnx
2020_06_11_exp3_TH	2	pyramidal	2	204	31.774	Point 32	791.068	-212.314	59.134	no cnx
2020_06_11_exp3_TH	2	pyramidal	2	204	31.774	Point 42	363.788	-188.807	-24.656	no cnx
2020_06_11_exp3_TH	2	pyramidal	2	204	31.774	Point 43	350.516	-126.756	39.934	no cnx
2020_06_11_exp3_TH	2	pyramidal	2	204	31.774	Point 40	630.393	-248.248	97.294	no cnx
2020_06_11_exp3_TH	2	pyramidal	2	204	31.774	Point 41	626.679	-253.357	70.954	no cnx
2020_06_11_exp3_TH	2	pyramidal	2	204	31.774	Point 44	192.2	-48.6457	31.094	no cnx
2020_06_11_exp3_TH	2	pyramidal	2	204	31.774	Point 45	374.265	-51.8586	89.544	no cnx
2020_06_11_exp3_TH	2	pyramidal	2	204	31.774	Point 28	814.665	219.565	88.074	no cnx
2020_06_11_exp3_TH	2	pyramidal	2	204	31.774	Point 29	765.751	192.118	53.054	no cnx
2020_06_11_exp3_TH	2	pyramidal	2	204	31.774	Point 20	661.546	-6.87973	49.024	no cnx
2020_06_11_exp3_TH	2	pyramidal	2	204	31.774	Point 21	643.184	1.0179	49.024	no cnx
2020_06_11_exp3_TH	2	pyramidal	2	204	31.774	Point 22	472.239	-85.3087	88.304	no cnx
2020_06_11_exp3_TH	2	pyramidal	2	204	31.774	Point 23	379.239	252.318	16.874	no cnx
2020_06_11_exp3_TH	2	pyramidal	2	204	31.774	Point 24	405.818	317.071	5.764	no cnx
2020_06_11_exp3_TH	2	pyramidal	2	204	31.774	Point 25	728.017	395.463	59.044	no cnx
2020_06_11_exp3_TH	2	pyramidal	2	204	31.774	Point 26	634.619	400.848	59.044	no cnx
2020_06_11_exp3_TH	2	pyramidal	2	204	31.774	Point 27	641.886	326.171	45.264	no cnx
2020_06_11_exp3_TH	2	pyramidal	2	204	31.774	Point 39	647.81	-477.408	97.294	no cnx
2020_06_11_exp3_TH	2	pyramidal	2	204	31.774	Point 33	682.815	-280.009	98.184	no cnx
2020_06_11_exp3_TH	2	pyramidal	2	204	31.774	Point 38	693.208	-620.187	107.514	no cnx
2020_06_11_exp2_TH	0	pyramidal	2	193	216.964	Point 5	358.413	73.6241	216.434	no cnx
2020_06_11_exp2_TH	0	pyramidal	2	193	216.964	Point 4	346.452	198.658	243.274	no cnx
2020_06_11_exp2_TH	0	pyramidal	2	193	216.964	Point 7	434.013	34.6657	205.404	no cnx
2020_06_11_exp2_TH	0	pyramidal	2	193	216.964	Point 6	486.561	79.354	216.434	excitatory
2020_06_11_exp2_TH	0	pyramidal	2	193	216.964	Point 1	395.075	219.371	288.104	no cnx
2020_06_11_exp2_TH	0	pyramidal	2	193	216.964	Point 3	350.674	47.2959	250.604	no cnx
2020_06_11_exp2_TH	0	pyramidal	2	193	216.964	Point 2	373.448	194.461	277.834	no cnx
2020_06_11_exp2_TH	0	pyramidal	2	193	216.964	Point 8	525.952	-5.71022	205.404	excitatory
2020_06_11_exp2_TH	0	pyramidal	2	193	216.964	Point 12	502.081	89.9597	231.294	no cnx
2020_06_11_exp1_TH	1	pyramidal	2	206	217.594	Point 5	406.841	119.886	201.374	no cnx
2020_06_11_exp1_TH	1	pyramidal	2	206	217.594	Point 4	399.04	145.916	225.164	no cnx
2020_06_11_exp1_TH	1	pyramidal	2	206	217.594	Point 7	401.353	-116.615	174.054	no cnx
2020_06_11_exp1_TH	1	pyramidal	2	206	217.594	Point 6	414.601	-3.30663	186.894	no cnx
2020_06_11_exp1_TH	1	pyramidal	2	206	217.594	Point 1	390.11	38.3458	223.014	no cnx
2020_06_11_exp1_TH	1	pyramidal	2	206	217.594	Point 3	408.897	181.051	231.924	no cnx
2020_06_11_exp1_TH	1	pyramidal	2	206	217.594	Point 2	369.258	218.409	231.924	no cnx
2020_06_11_exp1_TH	1	pyramidal	2	206	217.594	Point 9	767.508	54.9924	168.114	no cnx
2020_06_11_exp1_TH	1	pyramidal	2	206	217.594	Point 8	776.427	49.895	168.114	no cnx
2020_06_11_exp1_TH	1	pyramidal	2	206	217.594	Point 11	380.336	-41.9337	158.094	no cnx
2020_06_11_exp1_TH	1	pyramidal	2	206	217.594	Point 10	638.049	10.1474	164.744	no cnx
2020_06_11_exp1_TH	1	pyramidal	2	206	217.594	Point 13	249.114	31.4011	197.224	no cnx
2020_06_11_exp1_TH	1	pyramidal	2	206	217.594	Point 12	358.855	-58.5976	201.374	no cnx
2020_06_11_exp1_TH	1	pyramidal	2	206	217.594	Point 15	262.946	57.4587	223.104	no cnx
2020_06_11_exp1_TH	1	pyramidal	2	206	217.594	Point 14	165.69	-7.97349	223.104	no cnx
2020_06_11_exp1_TH	0	pyramidal	2	157	196.054	Point 5	394.215	268.932	201.374	no cnx
2020_06_11_exp1_TH	0	pyramidal	2	157	196.054	Point 4	386.414	294.962	225.164	no cnx
2020_06_11_exp1_TH	0	pyramidal	2	157	196.054	Point 7	388.727	32.4304	174.054	no cnx
2020_06_11_exp1_TH	0	pyramidal	2	157	196.054	Point 6	401.975	145.739	186.894	no cnx
2020_06_11_exp1_TH	0	pyramidal	2	157	196.054	Point 1	377.484	187.392	223.014	no cnx
2020_06_11_exp1_TH	0	pyramidal	2	157	196.054	Point 3	396.271	330.097	231.924	no cnx
2020_06_11_exp1_TH	0	pyramidal	2	157	196.054	Point 2	356.632	367.455	231.924	no cnx
2020_06_11_exp1_TH	0	pyramidal	2	157	196.054	Point 9	754.882	204.038	168.114	no cnx
2020_06_11_exp1_TH	0	pyramidal	2	157	196.054	Point 8	763.801	198.941	168.114	no cnx
2020_06_11_exp1_TH	0	pyramidal	2	157	196.054	Point 11	367.709	107.112	158.094	no cnx
2020_06_11_exp1_TH	0	pyramidal	2	157	196.054	Point 10	625.423	159.193	164.744	no cnx
2020_06_11_exp1_TH	0	pyramidal	2	157	196.054	Point 13	236.488	180.447	197.224	no cnx
2020_06_11_exp1_TH	0	pyramidal	2	157	196.054	Point 12	346.229	90.4482	201.374	no cnx
2020_06_11_exp1_TH	0	pyramidal	2	157	196.054	Point 15	250.32	206.505	223.104	no cnx
2020_06_11_exp1_TH	0	pyramidal	2	157	196.054	Point 14	153.063	141.072	223.104	no cnx
2020_06_05_exp3_TH	2	pyramidal	2	224	265	Point 5	388.403	125.977	285.994	no cnx
2020_06_05_exp3_TH	2	pyramidal	2	224	265	Point 4	341.446	13.8774	289.164	excitatory
2020_06_05_exp3_TH	2	pyramidal	2	224	265	Point 7	444.65	-80.2006	285.994	no cnx
2020_06_05_exp3_TH	2	pyramidal	2	224	265	Point 6	517.594	41.5355	285.994	no cnx
2020_06_05_exp3_TH	2	pyramidal	2	224	265	Point 1	491.468	116.127	294.984	no cnx
2020_06_05_exp3_TH	2	pyramidal	2	224	265	Point 3	342.653	-1.18139	297.504	no cnx
2020_06_05_exp3_TH	2	pyramidal	2	224	265	Point 2	446.998	49.5018	294.984	no cnx
2020_06_05_exp3_TH	2	pyramidal	2	224	265	Point 9	550.378	160.389	285.994	no cnx
2020_06_05_exp3_TH	2	pyramidal	2	224	265	Point 8	572.817	-50.5637	285.994	no cnx
2020_06_05_exp3_TH	2	pyramidal	2	224	265	Point 11	369.649	88.2125	285.994	no cnx
2020_06_05_exp3_TH	2	pyramidal	2	224	265	Point 10	450.416	-59.9898	285.994	excitatory
2020_06_05_exp3_TH	2	pyramidal	2	224	265	Point 12	446.095	-59.5062	293.204	no cnx
2020_06_05_exp2_TH	1	pyramidal	2	240	141.284	Point 11	399.582	93.4561	135.524	no cnx
2020_06_05_exp2_TH	1	pyramidal	2	240	141.284	Point 10	472.187	-100.799	135.524	no cnx
2020_06_05_exp2_TH	1	pyramidal	2	240	141.284	Point 13	447.592	1.83059	133.254	no cnx
2020_06_05_exp2_TH	1	pyramidal	2	240	141.284	Point 12	420.664	75.8754	135.524	no cnx
2020_06_05_exp2_TH	1	pyramidal	2	240	141.284	Point 15	455.381	-57.8272	125.074	no cnx
2020_06_05_exp2_TH	1	pyramidal	2	240	141.284	Point 14	380.166	102.223	125.074	no cnx
2020_06_05_exp2_TH	1	pyramidal	2	240	141.284	Point 17	439.814	-86.0272	125.074	no cnx
2020_06_05_exp2_TH	1	pyramidal	2	240	141.284	Point 16	475.735	68.3248	125.074	no cnx
2020_06_05_exp2_TH	1	pyramidal	2	240	141.284	Point 19	465.683	55.2257	107.764	no cnx
2020_06_05_exp2_TH	1	pyramidal	2	240	141.284	Point 18	433.999	30.061	116.254	no cnx
2020_06_05_exp2_TH	1	pyramidal	2	240	141.284	Point 5	563.513	-75.6999	155.374	no cnx
2020_06_05_exp2_TH	1	pyramidal	2	240	141.284	Point 4	532.213	20.5156	155.374	no cnx
2020_06_05_exp2_TH	1	pyramidal	2	240	141.284	Point 7	515.953	39.5688	144.334	no cnx
2020_06_05_exp2_TH	1	pyramidal	2	240	141.284	Point 6	401.639	33.4812	144.334	no cnx
2020_06_05_exp2_TH	1	pyramidal	2	240	141.284	Point 1	398.421	72.6868	161.764	no cnx
2020_06_05_exp2_TH	1	pyramidal	2	240	141.284	Point 3	387.395	111.148	155.374	no cnx
2020_06_05_exp2_TH	1	pyramidal	2	240	141.284	Point 2	516.56	-71.6406	161.764	no cnx
2020_06_05_exp2_TH	1	pyramidal	2	240	141.284	Point 9	425.373	-27.5858	142.534	no cnx
2020_06_05_exp2_TH	1	pyramidal	2	240	141.284	Point 8	557.482	94.8442	142.534	no cnx
2020_06_05_exp2_TH	1	pyramidal	2	240	141.284	Point 20	496.762	139.013	107.764	no cnx
2020_06_05_exp2_TH	1	pyramidal	2	240	141.284	Point 21	408.532	67.8952	78.504	excitatory
2020_06_05_exp2_TH	1	pyramidal	2	240	141.284	Point 23	535.008	164.833	55.934	no cnx
2020_06_05_exp2_TH	1	pyramidal	2	240	141.284	Point 24	569.759	84.4568	55.934	no cnx
2020_06_05_exp2_TH	1	pyramidal	2	240	141.284	Point 25	439.184	1.94874	55.934	no cnx
2020_06_05_exp2_TH	1	pyramidal	2	240	141.284	Point 26	700.671	-23.2675	76.774	no cnx
2020_06_05_exp2_TH	1	pyramidal	2	240	141.284	Point 27	659.653	-66.5446	76.774	no cnx
2020_06_05_exp2_TH	0	pyramidal	2	182	150.494	Point 11	396.678	114.444	135.524	no cnx
2020_06_05_exp2_TH	0	pyramidal	2	182	150.494	Point 10	469.283	-79.8107	135.524	no cnx
2020_06_05_exp2_TH	0	pyramidal	2	182	150.494	Point 13	444.688	22.8188	133.254	no cnx
2020_06_05_exp2_TH	0	pyramidal	2	182	150.494	Point 12	417.76	96.8636	135.524	no cnx
2020_06_05_exp2_TH	0	pyramidal	2	182	150.494	Point 5	560.609	-54.7117	155.374	no cnx
2020_06_05_exp2_TH	0	pyramidal	2	182	150.494	Point 4	529.309	41.5038	155.374	no cnx
2020_06_05_exp2_TH	0	pyramidal	2	182	150.494	Point 7	513.05	60.5569	144.334	no cnx
2020_06_05_exp2_TH	0	pyramidal	2	182	150.494	Point 6	398.735	54.4694	144.334	no cnx
2020_06_05_exp2_TH	0	pyramidal	2	182	150.494	Point 1	395.517	93.6749	161.764	no cnx
2020_06_05_exp2_TH	0	pyramidal	2	182	150.494	Point 3	384.491	132.136	155.374	no cnx
2020_06_05_exp2_TH	0	pyramidal	2	182	150.494	Point 2	513.656	-50.6524	161.764	no cnx
2020_06_05_exp2_TH	0	pyramidal	2	182	150.494	Point 9	422.469	-6.59769	142.534	excitatory
2020_06_05_exp2_TH	0	pyramidal	2	182	150.494	Point 8	554.578	115.832	142.534	no cnx
2020_06_05_exp1_TH	2	pyramidal	2	204	185.224	Point 5	694.998	-156.392	184.724	no cnx
2020_06_05_exp1_TH	2	pyramidal	2	204	185.224	Point 4	816.963	-109.409	184.724	no cnx
2020_06_05_exp1_TH	2	pyramidal	2	204	185.224	Point 7	782.408	-385.529	184.084	no cnx
2020_06_05_exp1_TH	2	pyramidal	2	204	185.224	Point 6	649.921	-157.894	140.374	no cnx
2020_06_05_exp1_TH	2	pyramidal	2	204	185.224	Point 1	385.963	4.44005	205.464	no cnx
2020_06_05_exp1_TH	2	pyramidal	2	204	185.224	Point 3	748.908	-26.8545	184.724	no cnx
2020_06_05_exp1_TH	2	pyramidal	2	204	185.224	Point 2	754.106	-46.8411	219.904	no cnx
2020_06_05_exp1_TH	2	pyramidal	2	204	185.224	Point 9	595.441	-315.057	138.244	excitatory
2020_06_05_exp1_TH	2	pyramidal	2	204	185.224	Point 8	637.093	-328.447	166.194	no cnx
2020_06_04_exp3_TH	2	pyramidal	2	249	120.724	Point 4	410.72	10.4039	111.974	excitatory
2020_06_04_exp3_TH	2	pyramidal	2	249	120.724	Point 7	444.84	20.0785	116.314	no cnx
2020_06_04_exp3_TH	2	pyramidal	2	249	120.724	Point 6	347.737	7.67319	100.804	no cnx
2020_06_04_exp3_TH	2	pyramidal	2	249	120.724	Point 1	454.868	-79.7498	129.594	excitatory
2020_06_04_exp3_TH	2	pyramidal	2	249	120.724	Point 3	368.354	135.924	130.724	no cnx
2020_06_04_exp3_TH	2	pyramidal	2	249	120.724	Point 2	548.283	-56.283	130.724	no cnx
2020_06_04_exp2_TH	3	pyramidal	2	218	316.514	Point 5	349.774	90.475	256.574	no cnx
2020_06_04_exp2_TH	3	pyramidal	2	218	316.514	Point 4	426.909	159.391	292.994	no cnx
2020_06_04_exp2_TH	3	pyramidal	2	218	316.514	Point 7	420.839	-1.30718	242.474	no cnx
2020_06_04_exp2_TH	3	pyramidal	2	218	316.514	Point 6	398.575	-37.7214	256.574	no cnx
2020_06_04_exp2_TH	3	pyramidal	2	218	316.514	Point 1	307.76	76.3228	320.994	no cnx
2020_06_04_exp2_TH	3	pyramidal	2	218	316.514	Point 3	423.136	47.3097	305.794	no cnx
2020_06_04_exp2_TH	3	pyramidal	2	218	316.514	Point 2	358.086	17.4318	314.644	no cnx
2020_06_04_exp2_TH	3	pyramidal	2	218	316.514	Point 9	349.823	-5.90976	236.264	no cnx
2020_06_04_exp2_TH	3	pyramidal	2	218	316.514	Point 8	344.14	162.741	236.264	no cnx
2020_06_04_exp2_TH	3	pyramidal	2	218	316.514	Point 11	617.572	156.162	349.754	no cnx
2020_06_04_exp2_TH	3	pyramidal	2	218	316.514	Point 10	583.932	156.703	349.754	no cnx
2020_06_04_exp2_TH	3	pyramidal	2	218	316.514	Point 13	587.847	-19.823	332.104	no cnx
2020_06_04_exp2_TH	3	pyramidal	2	218	316.514	Point 12	613.376	-74.1874	349.754	no cnx
2020_06_04_exp2_TH	3	pyramidal	2	218	316.514	Point 14	589.167	103.521	114.584	excitatory
2020_05_22_exp2_TH	3	pyramidal	2	227	39.5612	Point 5	356.998	178.64	34.071	no cnx
2020_05_22_exp2_TH	3	pyramidal	2	227	39.5612	Point 4	401.706	38.4416	39.041	no cnx
2020_05_22_exp2_TH	3	pyramidal	2	227	39.5612	Point 7	338.535	112.378	28.331	no cnx
2020_05_22_exp2_TH	3	pyramidal	2	227	39.5612	Point 6	352.789	28.0371	34.071	no cnx
2020_05_22_exp2_TH	3	pyramidal	2	227	39.5612	Point 1	400.817	44.355	58.341	no cnx
2020_05_22_exp2_TH	3	pyramidal	2	227	39.5612	Point 3	386.595	141.401	39.041	no cnx
2020_05_22_exp2_TH	3	pyramidal	2	227	39.5612	Point 2	332.325	42.392	48.541	no cnx
2020_05_22_exp2_TH	3	pyramidal	2	227	39.5612	Point 9	395.464	-41.697	28.331	no cnx
2020_05_22_exp2_TH	3	pyramidal	2	227	39.5612	Point 8	331.115	32.9714	28.331	no cnx
2020_05_22_exp2_TH	3	pyramidal	2	227	39.5612	Point 11	401.401	148.678	20.181	excitatory
2020_05_22_exp2_TH	3	pyramidal	2	227	39.5612	Point 10	442.675	249.475	23.311	no cnx
2020_05_22_exp2_TH	3	pyramidal	2	227	39.5612	Point 13	445.084	36.3802	21.701	no cnx
2020_05_22_exp2_TH	3	pyramidal	2	227	39.5612	Point 12	489.387	47.6442	21.701	no cnx
2020_05_22_exp2_TH	3	pyramidal	2	227	39.5612	Point 15	449.123	80.3975	7.161	excitatory
2020_05_22_exp2_TH	3	pyramidal	2	227	39.5612	Point 14	324.653	134.923	7.161	no cnx
2020_05_22_exp2_TH	3	pyramidal	2	227	39.5612	Point 17	342.475	-25.491	7.161	excitatory
2020_05_22_exp2_TH	3	pyramidal	2	227	39.5612	Point 16	452.047	6.11443	7.161	no cnx
2020_05_22_exp2_TH	3	pyramidal	2	227	39.5612	Point 19	482.175	111.768	9.101	no cnx
2020_05_22_exp2_TH	3	pyramidal	2	227	39.5612	Point 18	347.291	128.353	9.101	no cnx
2020_05_22_exp2_TH	3	pyramidal	2	227	39.5612	Point 20	433.038	17.236	9.101	no cnx
2020_05_22_exp2_TH	2	pyramidal	2	253	33.031	Point 5	351.232	171.475	34.071	no cnx
2020_05_22_exp2_TH	2	pyramidal	2	253	33.031	Point 4	395.941	31.2766	39.041	no cnx
2020_05_22_exp2_TH	2	pyramidal	2	253	33.031	Point 7	332.769	105.213	28.331	no cnx
2020_05_22_exp2_TH	2	pyramidal	2	253	33.031	Point 6	347.023	20.8722	34.071	no cnx
2020_05_22_exp2_TH	2	pyramidal	2	253	33.031	Point 1	395.051	37.19	58.341	no cnx
2020_05_22_exp2_TH	2	pyramidal	2	253	33.031	Point 3	380.829	134.236	39.041	no cnx
2020_05_22_exp2_TH	2	pyramidal	2	253	33.031	Point 2	326.559	35.2271	48.541	no cnx
2020_05_22_exp2_TH	2	pyramidal	2	253	33.031	Point 9	389.698	-48.862	28.331	no cnx
2020_05_22_exp2_TH	2	pyramidal	2	253	33.031	Point 8	325.349	25.8065	28.331	no cnx
2020_05_22_exp2_TH	2	pyramidal	2	253	33.031	Point 11	395.635	141.513	20.181	no cnx
2020_05_22_exp2_TH	2	pyramidal	2	253	33.031	Point 10	436.909	242.31	23.311	no cnx
2020_05_22_exp2_TH	2	pyramidal	2	253	33.031	Point 13	439.318	29.2153	21.701	no cnx
2020_05_22_exp2_TH	2	pyramidal	2	253	33.031	Point 12	483.621	40.4793	21.701	no cnx
2020_05_22_exp2_TH	2	pyramidal	2	253	33.031	Point 15	443.357	73.2326	7.161	no cnx
2020_05_22_exp2_TH	2	pyramidal	2	253	33.031	Point 14	318.887	127.758	7.161	no cnx
2020_05_22_exp2_TH	2	pyramidal	2	253	33.031	Point 17	336.71	-32.6559	7.161	no cnx
2020_05_22_exp2_TH	2	pyramidal	2	253	33.031	Point 16	446.281	-1.05049	7.161	excitatory
2020_05_22_exp2_TH	2	pyramidal	2	253	33.031	Point 19	476.409	104.603	9.101	no cnx
2020_05_22_exp2_TH	2	pyramidal	2	253	33.031	Point 18	341.525	121.188	9.101	no cnx
2020_05_22_exp2_TH	2	pyramidal	2	253	33.031	Point 20	427.273	10.0711	9.101	no cnx
2019_07_22_exp2_TH	2	pyramidal	2	209	345.436	Point 11	417.35	656.101	326.806	no cnx
2019_07_22_exp2_TH	2	pyramidal	2	209	345.436	Point 10	462.245	505.727	340.826	no cnx
2019_07_22_exp2_TH	2	pyramidal	2	209	345.436	Point 13	647.817	76.4033	299.936	no cnx
2019_07_22_exp2_TH	2	pyramidal	2	209	345.436	Point 12	543.307	305.775	308.316	no cnx
2019_07_22_exp2_TH	2	pyramidal	2	209	345.436	Point 15	651.352	87.4057	279.286	no cnx
2019_07_22_exp2_TH	2	pyramidal	2	209	345.436	Point 14	669.958	256.386	299.936	no cnx
2019_07_22_exp2_TH	2	pyramidal	2	209	345.436	Point 17	605.05	585.131	300.596	no cnx
2019_07_22_exp2_TH	2	pyramidal	2	209	345.436	Point 16	647.525	152.279	271.326	no cnx
2019_07_22_exp2_TH	2	pyramidal	2	209	345.436	Point 19	710.156	456.597	318.316	no cnx
2019_07_22_exp2_TH	2	pyramidal	2	209	345.436	Point 18	578.99	514.988	318.316	no cnx
2019_07_22_exp2_TH	2	pyramidal	2	209	345.436	Point 31	477.038	676.608	285.046	no cnx
2019_07_22_exp2_TH	2	pyramidal	2	209	345.436	Point 30	534.245	740.021	300.806	no cnx
2019_07_22_exp2_TH	2	pyramidal	2	209	345.436	Point 37	791.849	-43.8879	272.296	no cnx
2019_07_22_exp2_TH	2	pyramidal	2	209	345.436	Point 36	810.255	-89.3265	272.296	no cnx
2019_07_22_exp2_TH	2	pyramidal	2	209	345.436	Point 35	671.63	-140.123	286.526	no cnx
2019_07_22_exp2_TH	2	pyramidal	2	209	345.436	Point 34	701.314	-226.608	298.206	no cnx
2019_07_22_exp2_TH	2	pyramidal	2	209	345.436	Point 5	414.018	236.168	330.586	no cnx
2019_07_22_exp2_TH	2	pyramidal	2	209	345.436	Point 4	408.037	153.889	330.586	no cnx
2019_07_22_exp2_TH	2	pyramidal	2	209	345.436	Point 7	423.154	433.042	360.136	no cnx
2019_07_22_exp2_TH	2	pyramidal	2	209	345.436	Point 6	341.957	443.805	381.746	no cnx
2019_07_22_exp2_TH	2	pyramidal	2	209	345.436	Point 1	349.619	-91.2433	330.586	excitatory
2019_07_22_exp2_TH	2	pyramidal	2	209	345.436	Point 3	392.542	208.102	330.586	no cnx
2019_07_22_exp2_TH	2	pyramidal	2	209	345.436	Point 2	358.283	63.163	330.586	no cnx
2019_07_22_exp2_TH	2	pyramidal	2	209	345.436	Point 9	408.315	355.371	301.456	no cnx
2019_07_22_exp2_TH	2	pyramidal	2	209	345.436	Point 8	414.64	447.767	321.996	no cnx
2019_07_22_exp2_TH	2	pyramidal	2	209	345.436	Point 32	735.037	-61.983	310.336	no cnx
2019_07_22_exp2_TH	2	pyramidal	2	209	345.436	Point 42	452.382	-609.603	305.326	no cnx
2019_07_22_exp2_TH	2	pyramidal	2	209	345.436	Point 43	457.93	-508.401	305.326	no cnx
2019_07_22_exp2_TH	2	pyramidal	2	209	345.436	Point 40	822.477	70.2926	260.356	no cnx
2019_07_22_exp2_TH	2	pyramidal	2	209	345.436	Point 41	844.412	89.6118	260.356	no cnx
2019_07_22_exp2_TH	2	pyramidal	2	209	345.436	Point 46	327.53	-74.5382	357.136	no cnx
2019_07_22_exp2_TH	2	pyramidal	2	209	345.436	Point 47	318.669	-64.9943	357.136	no cnx
2019_07_22_exp2_TH	2	pyramidal	2	209	345.436	Point 44	598.236	-608.615	305.326	no cnx
2019_07_22_exp2_TH	2	pyramidal	2	209	345.436	Point 45	495.958	-537.058	305.326	no cnx
2019_07_22_exp2_TH	2	pyramidal	2	209	345.436	Point 28	417.031	619.459	300.806	no cnx
2019_07_22_exp2_TH	2	pyramidal	2	209	345.436	Point 29	449.821	730.028	300.806	no cnx
2019_07_22_exp2_TH	2	pyramidal	2	209	345.436	Point 20	462.038	-158.141	362.626	no cnx
2019_07_22_exp2_TH	2	pyramidal	2	209	345.436	Point 21	374.757	13.7319	362.626	no cnx
2019_07_22_exp2_TH	2	pyramidal	2	209	345.436	Point 22	458.286	21.0215	320.336	no cnx
2019_07_22_exp2_TH	2	pyramidal	2	209	345.436	Point 23	392.092	-145.552	312.536	no cnx
2019_07_22_exp2_TH	2	pyramidal	2	209	345.436	Point 24	420.539	-170.467	293.266	no cnx
2019_07_22_exp2_TH	2	pyramidal	2	209	345.436	Point 26	366.435	195.152	308.926	excitatory
2019_07_22_exp2_TH	2	pyramidal	2	209	345.436	Point 27	448.973	144.585	308.926	no cnx
2019_07_22_exp2_TH	2	pyramidal	2	209	345.436	Point 39	723.324	-72.4214	260.356	no cnx
2019_07_22_exp2_TH	2	pyramidal	2	209	345.436	Point 33	646.11	-241.4	298.206	no cnx
2019_07_22_exp2_TH	2	pyramidal	2	209	345.436	Point 38	779.186	12.3218	272.296	no cnx
2019_07_22_exp2_TH	0	pyramidal	2	258	323.836	Point 11	410.647	807.392	326.806	no cnx
2019_07_22_exp2_TH	0	pyramidal	2	258	323.836	Point 10	455.542	657.018	340.826	no cnx
2019_07_22_exp2_TH	0	pyramidal	2	258	323.836	Point 13	641.114	227.694	299.936	no cnx
2019_07_22_exp2_TH	0	pyramidal	2	258	323.836	Point 12	536.604	457.065	308.316	no cnx
2019_07_22_exp2_TH	0	pyramidal	2	258	323.836	Point 15	644.649	238.696	279.286	no cnx
2019_07_22_exp2_TH	0	pyramidal	2	258	323.836	Point 14	663.255	407.677	299.936	no cnx
2019_07_22_exp2_TH	0	pyramidal	2	258	323.836	Point 17	598.346	736.422	300.596	no cnx
2019_07_22_exp2_TH	0	pyramidal	2	258	323.836	Point 16	640.822	303.57	271.326	no cnx
2019_07_22_exp2_TH	0	pyramidal	2	258	323.836	Point 19	703.453	607.887	318.316	no cnx
2019_07_22_exp2_TH	0	pyramidal	2	258	323.836	Point 18	572.287	666.279	318.316	no cnx
2019_07_22_exp2_TH	0	pyramidal	2	258	323.836	Point 31	470.335	827.899	285.046	no cnx
2019_07_22_exp2_TH	0	pyramidal	2	258	323.836	Point 30	527.541	891.312	300.806	no cnx
2019_07_22_exp2_TH	0	pyramidal	2	258	323.836	Point 37	785.146	107.403	272.296	no cnx
2019_07_22_exp2_TH	0	pyramidal	2	258	323.836	Point 36	803.552	61.9641	272.296	no cnx
2019_07_22_exp2_TH	0	pyramidal	2	258	323.836	Point 35	664.927	11.1677	286.526	no cnx
2019_07_22_exp2_TH	0	pyramidal	2	258	323.836	Point 34	694.611	-75.3168	298.206	no cnx
2019_07_22_exp2_TH	0	pyramidal	2	258	323.836	Point 5	407.314	387.459	330.586	no cnx
2019_07_22_exp2_TH	0	pyramidal	2	258	323.836	Point 4	401.334	305.18	330.586	no cnx
2019_07_22_exp2_TH	0	pyramidal	2	258	323.836	Point 7	416.45	584.333	360.136	no cnx
2019_07_22_exp2_TH	0	pyramidal	2	258	323.836	Point 6	335.254	595.095	381.746	no cnx
2019_07_22_exp2_TH	0	pyramidal	2	258	323.836	Point 1	342.916	60.0474	330.586	no cnx
2019_07_22_exp2_TH	0	pyramidal	2	258	323.836	Point 3	385.839	359.392	330.586	no cnx
2019_07_22_exp2_TH	0	pyramidal	2	258	323.836	Point 2	351.58	214.454	330.586	no cnx
2019_07_22_exp2_TH	0	pyramidal	2	258	323.836	Point 9	401.612	506.662	301.456	no cnx
2019_07_22_exp2_TH	0	pyramidal	2	258	323.836	Point 8	407.937	599.058	321.996	no cnx
2019_07_22_exp2_TH	0	pyramidal	2	258	323.836	Point 32	728.334	89.3077	310.336	no cnx
2019_07_22_exp2_TH	0	pyramidal	2	258	323.836	Point 42	445.679	-458.312	305.326	no cnx
2019_07_22_exp2_TH	0	pyramidal	2	258	323.836	Point 43	451.227	-357.11	305.326	no cnx
2019_07_22_exp2_TH	0	pyramidal	2	258	323.836	Point 40	815.774	221.583	260.356	no cnx
2019_07_22_exp2_TH	0	pyramidal	2	258	323.836	Point 41	837.709	240.902	260.356	no cnx
2019_07_22_exp2_TH	0	pyramidal	2	258	323.836	Point 46	320.827	76.7525	357.136	no cnx
2019_07_22_exp2_TH	0	pyramidal	2	258	323.836	Point 47	311.966	86.2964	357.136	no cnx
2019_07_22_exp2_TH	0	pyramidal	2	258	323.836	Point 44	591.533	-457.325	305.326	no cnx
2019_07_22_exp2_TH	0	pyramidal	2	258	323.836	Point 45	489.255	-385.767	305.326	no cnx
2019_07_22_exp2_TH	0	pyramidal	2	258	323.836	Point 28	410.328	770.75	300.806	no cnx
2019_07_22_exp2_TH	0	pyramidal	2	258	323.836	Point 29	443.118	881.319	300.806	no cnx
2019_07_22_exp2_TH	0	pyramidal	2	258	323.836	Point 20	455.335	-6.85079	362.626	no cnx
2019_07_22_exp2_TH	0	pyramidal	2	258	323.836	Point 21	368.054	165.023	362.626	no cnx
2019_07_22_exp2_TH	0	pyramidal	2	258	323.836	Point 22	451.583	172.312	320.336	no cnx
2019_07_22_exp2_TH	0	pyramidal	2	258	323.836	Point 23	385.389	5.73835	312.536	excitatory
2019_07_22_exp2_TH	0	pyramidal	2	258	323.836	Point 24	413.836	-19.1758	293.266	no cnx
2019_07_22_exp2_TH	0	pyramidal	2	258	323.836	Point 26	359.732	346.443	308.926	no cnx
2019_07_22_exp2_TH	0	pyramidal	2	258	323.836	Point 27	442.27	295.876	308.926	no cnx
2019_07_22_exp2_TH	0	pyramidal	2	258	323.836	Point 39	716.621	78.8693	260.356	no cnx
2019_07_22_exp2_TH	0	pyramidal	2	258	323.836	Point 33	639.407	-90.1096	298.206	no cnx
2019_07_22_exp2_TH	0	pyramidal	2	258	323.836	Point 38	772.483	163.613	272.296	no cnx
2019_07_22_exp1_TH	3	pyramidal	2	175	398.816	Point 11	488.111	568.321	374.416	no cnx
2019_07_22_exp1_TH	3	pyramidal	2	175	398.816	Point 10	556.894	574.992	374.416	no cnx
2019_07_22_exp1_TH	3	pyramidal	2	175	398.816	Point 13	639.316	253.749	425.476	no cnx
2019_07_22_exp1_TH	3	pyramidal	2	175	398.816	Point 12	561.043	301.006	425.476	no cnx
2019_07_22_exp1_TH	3	pyramidal	2	175	398.816	Point 15	353.89	-274.817	371.046	no cnx
2019_07_22_exp1_TH	3	pyramidal	2	175	398.816	Point 14	455.498	29.4656	436.776	no cnx
2019_07_22_exp1_TH	3	pyramidal	2	175	398.816	Point 17	481.801	-292.99	371.046	no cnx
2019_07_22_exp1_TH	3	pyramidal	2	175	398.816	Point 16	354.418	-173.453	371.046	no cnx
2019_07_22_exp1_TH	3	pyramidal	2	175	398.816	Point 19	780.106	-237.357	365.516	no cnx
2019_07_22_exp1_TH	3	pyramidal	2	175	398.816	Point 18	368.142	-361.863	428.596	no cnx
2019_07_22_exp1_TH	3	pyramidal	2	175	398.816	Point 30	360.178	119.95	431.716	no cnx
2019_07_22_exp1_TH	3	pyramidal	2	175	398.816	Point 5	379.491	908.93	366.986	no cnx
2019_07_22_exp1_TH	3	pyramidal	2	175	398.816	Point 4	458.949	910.461	380.416	no cnx
2019_07_22_exp1_TH	3	pyramidal	2	175	398.816	Point 7	426.331	882.939	358.716	no cnx
2019_07_22_exp1_TH	3	pyramidal	2	175	398.816	Point 6	359.555	800.871	366.986	no cnx
2019_07_22_exp1_TH	3	pyramidal	2	175	398.816	Point 1	307.835	537.698	388.616	no cnx
2019_07_22_exp1_TH	3	pyramidal	2	175	398.816	Point 3	345.72	885.473	393.886	no cnx
2019_07_22_exp1_TH	3	pyramidal	2	175	398.816	Point 2	344.651	492.741	410.386	no cnx
2019_07_22_exp1_TH	3	pyramidal	2	175	398.816	Point 9	485.261	694.889	343.506	no cnx
2019_07_22_exp1_TH	3	pyramidal	2	175	398.816	Point 8	365.227	785.894	343.506	no cnx
2019_07_22_exp1_TH	3	pyramidal	2	175	398.816	Point 28	429.612	116.215	431.716	excitatory
2019_07_22_exp1_TH	3	pyramidal	2	175	398.816	Point 29	301.04	15.8592	431.716	no cnx
2019_07_22_exp1_TH	3	pyramidal	2	175	398.816	Point 20	729.538	-275.9	365.516	no cnx
2019_07_22_exp1_TH	3	pyramidal	2	175	398.816	Point 21	819.598	-349.699	351.156	no cnx
2019_07_22_exp1_TH	3	pyramidal	2	175	398.816	Point 22	812.37	-519.594	351.156	no cnx
2019_07_22_exp1_TH	3	pyramidal	2	175	398.816	Point 23	881.085	-484.21	351.156	no cnx
2019_07_22_exp1_TH	3	pyramidal	2	175	398.816	Point 24	635.166	63.0167	442.686	no cnx
2019_07_22_exp1_TH	3	pyramidal	2	175	398.816	Point 25	670.079	-15.273	442.686	no cnx
2019_07_22_exp1_TH	3	pyramidal	2	175	398.816	Point 26	773.56	34.4431	432.856	no cnx
2019_07_22_exp1_TH	3	pyramidal	2	175	398.816	Point 27	586.293	96.4021	414.986	no cnx
2019_07_22_exp1_TH	0	pyramidal	2	247	409.886	Point 11	499.988	291.359	374.416	no cnx
2019_07_22_exp1_TH	0	pyramidal	2	247	409.886	Point 10	568.771	298.03	374.416	no cnx
2019_07_22_exp1_TH	0	pyramidal	2	247	409.886	Point 13	651.193	-23.2133	425.476	no cnx
2019_07_22_exp1_TH	0	pyramidal	2	247	409.886	Point 12	572.919	24.0435	425.476	excitatory
2019_07_22_exp1_TH	0	pyramidal	2	247	409.886	Point 15	365.767	-551.78	371.046	no cnx
2019_07_22_exp1_TH	0	pyramidal	2	247	409.886	Point 14	467.375	-247.497	436.776	no cnx
2019_07_22_exp1_TH	0	pyramidal	2	247	409.886	Point 17	493.678	-569.952	371.046	no cnx
2019_07_22_exp1_TH	0	pyramidal	2	247	409.886	Point 16	366.295	-450.415	371.046	no cnx
2019_07_22_exp1_TH	0	pyramidal	2	247	409.886	Point 19	791.982	-514.319	365.516	no cnx
2019_07_22_exp1_TH	0	pyramidal	2	247	409.886	Point 18	380.018	-638.825	428.596	no cnx
2019_07_22_exp1_TH	0	pyramidal	2	247	409.886	Point 5	391.368	631.968	366.986	no cnx
2019_07_22_exp1_TH	0	pyramidal	2	247	409.886	Point 4	470.826	633.498	380.416	no cnx
2019_07_22_exp1_TH	0	pyramidal	2	247	409.886	Point 7	438.207	605.977	358.716	no cnx
2019_07_22_exp1_TH	0	pyramidal	2	247	409.886	Point 6	371.431	523.908	366.986	no cnx
2019_07_22_exp1_TH	0	pyramidal	2	247	409.886	Point 1	319.712	260.736	388.616	excitatory
2019_07_22_exp1_TH	0	pyramidal	2	247	409.886	Point 3	357.597	608.511	393.886	no cnx
2019_07_22_exp1_TH	0	pyramidal	2	247	409.886	Point 2	356.528	215.779	410.386	no cnx
2019_07_22_exp1_TH	0	pyramidal	2	247	409.886	Point 9	497.138	417.926	343.506	no cnx
2019_07_22_exp1_TH	0	pyramidal	2	247	409.886	Point 8	377.104	508.932	343.506	no cnx
2019_07_22_exp1_TH	0	pyramidal	2	247	409.886	Point 20	741.415	-552.863	365.516	no cnx
2019_07_22_exp1_TH	0	pyramidal	2	247	409.886	Point 21	831.475	-626.662	351.156	no cnx
2019_07_22_exp1_TH	0	pyramidal	2	247	409.886	Point 22	824.247	-796.556	351.156	no cnx
2019_07_22_exp1_TH	0	pyramidal	2	247	409.886	Point 23	892.961	-761.173	351.156	no cnx
2019_07_22_exp1_TH	0	pyramidal	2	247	409.886	Point 24	647.042	-213.946	442.686	no cnx
2019_07_22_exp1_TH	0	pyramidal	2	247	409.886	Point 25	681.956	-292.235	442.686	no cnx
2019_07_22_exp1_TH	0	pyramidal	2	247	409.886	Point 26	785.437	-242.519	432.856	no cnx
2019_07_22_exp1_TH	0	pyramidal	2	247	409.886	Point 27	598.17	-180.56	414.986	excitatory
2019_03_27_exp2_TH	3	pyramidal	2	262	130.225	Point 11	552.923	-276.886	171.435	no cnx
2019_03_27_exp2_TH	3	pyramidal	2	262	130.225	Point 10	566.978	193.285	113.255	excitatory
2019_03_27_exp2_TH	3	pyramidal	2	262	130.225	Point 13	610.468	-126.587	121.825	no cnx
2019_03_27_exp2_TH	3	pyramidal	2	262	130.225	Point 12	580.382	-46.8848	171.435	no cnx
2019_03_27_exp2_TH	3	pyramidal	2	262	130.225	Point 15	804.818	2.01523	185.355	no cnx
2019_03_27_exp2_TH	3	pyramidal	2	262	130.225	Point 14	589.121	-187.632	112.625	excitatory
2019_03_27_exp2_TH	3	pyramidal	2	262	130.225	Point 17	865.484	-63.6697	148.335	no cnx
2019_03_27_exp2_TH	3	pyramidal	2	262	130.225	Point 16	861.424	96.814	163.825	no cnx
2019_03_27_exp2_TH	3	pyramidal	2	262	130.225	Point 19	676.669	-35.7007	148.335	no cnx
2019_03_27_exp2_TH	3	pyramidal	2	262	130.225	Point 18	816.609	-111.033	148.335	no cnx
2019_03_27_exp2_TH	3	pyramidal	2	262	130.225	Point 30	778.067	-468.925	176.785	excitatory
2019_03_27_exp2_TH	3	pyramidal	2	262	130.225	Point 5	307.028	-20.2455	162.865	no cnx
2019_03_27_exp2_TH	3	pyramidal	2	262	130.225	Point 4	438.059	-204.928	103.235	no cnx
2019_03_27_exp2_TH	3	pyramidal	2	262	130.225	Point 7	459.841	203.356	151.145	no cnx
2019_03_27_exp2_TH	3	pyramidal	2	262	130.225	Point 6	374.944	-154.439	162.865	no cnx
2019_03_27_exp2_TH	3	pyramidal	2	262	130.225	Point 1	455.768	-44.8059	131.715	no cnx
2019_03_27_exp2_TH	3	pyramidal	2	262	130.225	Point 3	389.043	-141.602	103.235	no cnx
2019_03_27_exp2_TH	3	pyramidal	2	262	130.225	Point 2	519.029	6.13008	131.715	no cnx
2019_03_27_exp2_TH	3	pyramidal	2	262	130.225	Point 9	556.295	207.216	129.095	no cnx
2019_03_27_exp2_TH	3	pyramidal	2	262	130.225	Point 8	591.371	106.423	129.095	no cnx
2019_03_27_exp2_TH	3	pyramidal	2	262	130.225	Point 28	705.634	-352.815	176.785	no cnx
2019_03_27_exp2_TH	3	pyramidal	2	262	130.225	Point 29	736.677	-367.2	176.785	no cnx
2019_03_27_exp2_TH	3	pyramidal	2	262	130.225	Point 20	784.072	62.6595	148.335	no cnx
2019_03_27_exp2_TH	3	pyramidal	2	262	130.225	Point 21	770.719	193.696	156.095	no cnx
2019_03_27_exp2_TH	3	pyramidal	2	262	130.225	Point 22	709.027	161.914	138.265	no cnx
2019_03_27_exp2_TH	3	pyramidal	2	262	130.225	Point 23	368.745	238.392	162.465	no cnx
2019_03_27_exp2_TH	3	pyramidal	2	262	130.225	Point 24	384.931	244.768	162.465	no cnx
2019_03_27_exp2_TH	3	pyramidal	2	262	130.225	Point 25	521.303	-463.16	181.645	no cnx
2019_03_27_exp2_TH	3	pyramidal	2	262	130.225	Point 26	510.98	-512.191	162.135	no cnx
2019_03_27_exp2_TH	3	pyramidal	2	262	130.225	Point 27	423.084	-333.089	162.135	no cnx
2019_03_27_exp2_TH	2	pyramidal	2	252	152.885	Point 11	541.328	-199.855	171.435	no cnx
2019_03_27_exp2_TH	2	pyramidal	2	252	152.885	Point 10	555.383	270.316	113.255	no cnx
2019_03_27_exp2_TH	2	pyramidal	2	252	152.885	Point 13	598.873	-49.5565	121.825	excitatory
2019_03_27_exp2_TH	2	pyramidal	2	252	152.885	Point 12	568.787	30.1461	171.435	no cnx
2019_03_27_exp2_TH	2	pyramidal	2	252	152.885	Point 15	793.223	79.0461	185.355	no cnx
2019_03_27_exp2_TH	2	pyramidal	2	252	152.885	Point 14	577.526	-110.601	112.625	no cnx
2019_03_27_exp2_TH	2	pyramidal	2	252	152.885	Point 17	853.889	13.3612	148.335	no cnx
2019_03_27_exp2_TH	2	pyramidal	2	252	152.885	Point 16	849.829	173.845	163.825	no cnx
2019_03_27_exp2_TH	2	pyramidal	2	252	152.885	Point 19	665.074	41.3302	148.335	no cnx
2019_03_27_exp2_TH	2	pyramidal	2	252	152.885	Point 18	805.014	-34.0017	148.335	no cnx
2019_03_27_exp2_TH	2	pyramidal	2	252	152.885	Point 30	766.472	-391.894	176.785	no cnx
2019_03_27_exp2_TH	2	pyramidal	2	252	152.885	Point 5	295.433	56.7854	162.865	no cnx
2019_03_27_exp2_TH	2	pyramidal	2	252	152.885	Point 4	426.464	-127.897	103.235	no cnx
2019_03_27_exp2_TH	2	pyramidal	2	252	152.885	Point 7	448.246	280.387	151.145	no cnx
2019_03_27_exp2_TH	2	pyramidal	2	252	152.885	Point 6	363.349	-77.4082	162.865	no cnx
2019_03_27_exp2_TH	2	pyramidal	2	252	152.885	Point 1	444.173	32.225	131.715	excitatory
2019_03_27_exp2_TH	2	pyramidal	2	252	152.885	Point 3	377.448	-64.5715	103.235	no cnx
2019_03_27_exp2_TH	2	pyramidal	2	252	152.885	Point 2	507.434	83.161	131.715	no cnx
2019_03_27_exp2_TH	2	pyramidal	2	252	152.885	Point 9	544.701	284.247	129.095	no cnx
2019_03_27_exp2_TH	2	pyramidal	2	252	152.885	Point 8	579.776	183.454	129.095	no cnx
2019_03_27_exp2_TH	2	pyramidal	2	252	152.885	Point 28	694.039	-275.784	176.785	no cnx
2019_03_27_exp2_TH	2	pyramidal	2	252	152.885	Point 29	725.082	-290.169	176.785	no cnx
2019_03_27_exp2_TH	2	pyramidal	2	252	152.885	Point 20	772.477	139.69	148.335	no cnx
2019_03_27_exp2_TH	2	pyramidal	2	252	152.885	Point 21	759.124	270.727	156.095	no cnx
2019_03_27_exp2_TH	2	pyramidal	2	252	152.885	Point 22	697.432	238.945	138.265	no cnx
2019_03_27_exp2_TH	2	pyramidal	2	252	152.885	Point 23	357.15	315.423	162.465	no cnx
2019_03_27_exp2_TH	2	pyramidal	2	252	152.885	Point 24	373.336	321.799	162.465	no cnx
2019_03_27_exp2_TH	2	pyramidal	2	252	152.885	Point 25	509.708	-386.129	181.645	no cnx
2019_03_27_exp2_TH	2	pyramidal	2	252	152.885	Point 26	499.385	-435.16	162.135	no cnx
2019_03_27_exp2_TH	2	pyramidal	2	252	152.885	Point 27	411.489	-256.058	162.135	no cnx
2019_03_27_exp2_TH	0	pyramidal	2	311	169.145	Point 11	530.642	-82.5579	171.435	no cnx
2019_03_27_exp2_TH	0	pyramidal	2	311	169.145	Point 10	544.697	387.613	113.255	no cnx
2019_03_27_exp2_TH	0	pyramidal	2	311	169.145	Point 13	588.187	67.7411	121.825	no cnx
2019_03_27_exp2_TH	0	pyramidal	2	311	169.145	Point 12	558.1	147.444	171.435	no cnx
2019_03_27_exp2_TH	0	pyramidal	2	311	169.145	Point 15	782.536	196.344	185.355	no cnx
2019_03_27_exp2_TH	0	pyramidal	2	311	169.145	Point 14	566.84	6.69659	112.625	no cnx
2019_03_27_exp2_TH	0	pyramidal	2	311	169.145	Point 17	843.202	130.659	148.335	no cnx
2019_03_27_exp2_TH	0	pyramidal	2	311	169.145	Point 16	839.143	291.142	163.825	no cnx
2019_03_27_exp2_TH	0	pyramidal	2	311	169.145	Point 19	654.387	158.628	148.335	no cnx
2019_03_27_exp2_TH	0	pyramidal	2	311	169.145	Point 18	794.328	83.2959	148.335	no cnx
2019_03_27_exp2_TH	0	pyramidal	2	311	169.145	Point 30	755.785	-274.596	176.785	excitatory
2019_03_27_exp2_TH	0	pyramidal	2	311	169.145	Point 5	284.746	174.083	162.865	no cnx
2019_03_27_exp2_TH	0	pyramidal	2	311	169.145	Point 4	415.777	-10.5996	103.235	no cnx
2019_03_27_exp2_TH	0	pyramidal	2	311	169.145	Point 7	437.56	397.685	151.145	no cnx
2019_03_27_exp2_TH	0	pyramidal	2	311	169.145	Point 6	352.662	39.8894	162.865	no cnx
2019_03_27_exp2_TH	0	pyramidal	2	311	169.145	Point 1	433.486	149.523	131.715	no cnx
2019_03_27_exp2_TH	0	pyramidal	2	311	169.145	Point 3	366.761	52.7261	103.235	no cnx
2019_03_27_exp2_TH	0	pyramidal	2	311	169.145	Point 2	496.748	200.459	131.715	no cnx
2019_03_27_exp2_TH	0	pyramidal	2	311	169.145	Point 9	534.014	401.545	129.095	no cnx
2019_03_27_exp2_TH	0	pyramidal	2	311	169.145	Point 8	569.09	300.751	129.095	no cnx
2019_03_27_exp2_TH	0	pyramidal	2	311	169.145	Point 28	683.353	-158.486	176.785	excitatory
2019_03_27_exp2_TH	0	pyramidal	2	311	169.145	Point 29	714.395	-172.871	176.785	no cnx
2019_03_27_exp2_TH	0	pyramidal	2	311	169.145	Point 20	761.791	256.988	148.335	no cnx
2019_03_27_exp2_TH	0	pyramidal	2	311	169.145	Point 21	748.438	388.024	156.095	no cnx
2019_03_27_exp2_TH	0	pyramidal	2	311	169.145	Point 22	686.746	356.242	138.265	no cnx
2019_03_27_exp2_TH	0	pyramidal	2	311	169.145	Point 23	346.464	432.721	162.465	no cnx
2019_03_27_exp2_TH	0	pyramidal	2	311	169.145	Point 24	362.65	439.096	162.465	no cnx
2019_03_27_exp2_TH	0	pyramidal	2	311	169.145	Point 25	499.022	-268.832	181.645	no cnx
2019_03_27_exp2_TH	0	pyramidal	2	311	169.145	Point 26	488.699	-317.863	162.135	no cnx
2019_03_27_exp2_TH	0	pyramidal	2	311	169.145	Point 27	400.803	-138.761	162.135	no cnx
2019_03_27_exp1_TH	2	pyramidal	2	166	152.885	Point 11	330.878	-39.2257	135.665	no cnx
2019_03_27_exp1_TH	2	pyramidal	2	166	152.885	Point 10	381.931	108.582	164.735	no cnx
2019_03_27_exp1_TH	2	pyramidal	2	166	152.885	Point 13	410.091	-48.0669	135.665	no cnx
2019_03_27_exp1_TH	2	pyramidal	2	166	152.885	Point 12	474.99	-106.901	135.665	no cnx
2019_03_27_exp1_TH	2	pyramidal	2	166	152.885	Point 15	470.217	-150.213	135.665	no cnx
2019_03_27_exp1_TH	2	pyramidal	2	166	152.885	Point 14	360.613	-132.548	135.665	no cnx
2019_03_27_exp1_TH	2	pyramidal	2	166	152.885	Point 17	423.855	-22.3361	104.545	no cnx
2019_03_27_exp1_TH	2	pyramidal	2	166	152.885	Point 16	351.024	-62.1414	135.665	no cnx
2019_03_27_exp1_TH	2	pyramidal	2	166	152.885	Point 19	631.869	81.6659	160.605	no cnx
2019_03_27_exp1_TH	2	pyramidal	2	166	152.885	Point 18	699.686	201.793	160.605	no cnx
2019_03_27_exp1_TH	2	pyramidal	2	166	152.885	Point 31	391.711	176.74	156.905	no cnx
2019_03_27_exp1_TH	2	pyramidal	2	166	152.885	Point 30	336.512	162.454	156.905	no cnx
2019_03_27_exp1_TH	2	pyramidal	2	166	152.885	Point 37	446.158	469.917	164.705	no cnx
2019_03_27_exp1_TH	2	pyramidal	2	166	152.885	Point 36	369.053	541.616	164.705	no cnx
2019_03_27_exp1_TH	2	pyramidal	2	166	152.885	Point 35	343.76	480.973	164.705	no cnx
2019_03_27_exp1_TH	2	pyramidal	2	166	152.885	Point 34	314.608	644.972	207.725	no cnx
2019_03_27_exp1_TH	2	pyramidal	2	166	152.885	Point 5	460.446	110.034	179.645	no cnx
2019_03_27_exp1_TH	2	pyramidal	2	166	152.885	Point 4	457.6	62.6905	183.555	no cnx
2019_03_27_exp1_TH	2	pyramidal	2	166	152.885	Point 7	448.092	10.0417	170.935	excitatory
2019_03_27_exp1_TH	2	pyramidal	2	166	152.885	Point 6	338.494	43.9806	170.935	no cnx
2019_03_27_exp1_TH	2	pyramidal	2	166	152.885	Point 1	343.231	107.262	194.885	no cnx
2019_03_27_exp1_TH	2	pyramidal	2	166	152.885	Point 3	338.79	172.168	183.555	no cnx
2019_03_27_exp1_TH	2	pyramidal	2	166	152.885	Point 2	484.109	98.1737	194.885	no cnx
2019_03_27_exp1_TH	2	pyramidal	2	166	152.885	Point 9	490.388	-55.0357	164.735	no cnx
2019_03_27_exp1_TH	2	pyramidal	2	166	152.885	Point 8	457.136	159.14	164.735	no cnx
2019_03_27_exp1_TH	2	pyramidal	2	166	152.885	Point 32	385.254	325.563	156.905	no cnx
2019_03_27_exp1_TH	2	pyramidal	2	166	152.885	Point 28	544.019	352.981	195.595	no cnx
2019_03_27_exp1_TH	2	pyramidal	2	166	152.885	Point 29	312.788	422.444	195.595	no cnx
2019_03_27_exp1_TH	2	pyramidal	2	166	152.885	Point 20	694.009	219.596	160.605	no cnx
2019_03_27_exp1_TH	2	pyramidal	2	166	152.885	Point 21	583.51	43.7026	160.605	no cnx
2019_03_27_exp1_TH	2	pyramidal	2	166	152.885	Point 22	538.968	250.922	148.625	no cnx
2019_03_27_exp1_TH	2	pyramidal	2	166	152.885	Point 23	590.143	111.249	148.625	no cnx
2019_03_27_exp1_TH	2	pyramidal	2	166	152.885	Point 24	589.774	9.97385	138.475	no cnx
2019_03_27_exp1_TH	2	pyramidal	2	166	152.885	Point 25	638.304	105.321	138.475	no cnx
2019_03_27_exp1_TH	2	pyramidal	2	166	152.885	Point 26	668.401	111.92	138.475	no cnx
2019_03_27_exp1_TH	2	pyramidal	2	166	152.885	Point 27	404.337	431.762	212.745	no cnx
2019_03_27_exp1_TH	2	pyramidal	2	166	152.885	Point 33	304.242	271.648	156.905	no cnx
2019_03_25_exp2_TH	3	pyramidal	2	202	159.015	Point 11	449.433	150.733	190.315	no cnx
2019_03_25_exp2_TH	3	pyramidal	2	202	159.015	Point 10	330.756	60.5054	200.825	excitatory
2019_03_25_exp2_TH	3	pyramidal	2	202	159.015	Point 13	302.99	-8.76978	190.315	excitatory
2019_03_25_exp2_TH	3	pyramidal	2	202	159.015	Point 12	380.335	64.6663	190.315	no cnx
2019_03_25_exp2_TH	3	pyramidal	2	202	159.015	Point 15	377.771	83.1431	183.315	no cnx
2019_03_25_exp2_TH	3	pyramidal	2	202	159.015	Point 14	459.799	100.996	190.315	excitatory
2019_03_25_exp2_TH	3	pyramidal	2	202	159.015	Point 17	430.945	289.459	196.945	no cnx
2019_03_25_exp2_TH	3	pyramidal	2	202	159.015	Point 16	395.357	-42.8006	183.315	no cnx
2019_03_25_exp2_TH	3	pyramidal	2	202	159.015	Point 19	415.568	304.724	169.505	no cnx
2019_03_25_exp2_TH	3	pyramidal	2	202	159.015	Point 18	302.377	299.147	169.505	no cnx
2019_03_25_exp2_TH	3	pyramidal	2	202	159.015	Point 31	359.004	-253.416	231.415	no cnx
2019_03_25_exp2_TH	3	pyramidal	2	202	159.015	Point 30	397.043	-183.388	231.415	no cnx
2019_03_25_exp2_TH	3	pyramidal	2	202	159.015	Point 37	465.847	-336.091	207.685	no cnx
2019_03_25_exp2_TH	3	pyramidal	2	202	159.015	Point 36	520.861	-312.44	229.195	no cnx
2019_03_25_exp2_TH	3	pyramidal	2	202	159.015	Point 35	617.678	-281.974	231.415	no cnx
2019_03_25_exp2_TH	3	pyramidal	2	202	159.015	Point 34	429.868	-311.872	231.415	no cnx
2019_03_25_exp2_TH	3	pyramidal	2	202	159.015	Point 5	408.499	-60.6211	220.565	no cnx
2019_03_25_exp2_TH	3	pyramidal	2	202	159.015	Point 4	397.882	168.315	220.565	no cnx
2019_03_25_exp2_TH	3	pyramidal	2	202	159.015	Point 7	400.617	43.4043	211.225	excitatory
2019_03_25_exp2_TH	3	pyramidal	2	202	159.015	Point 6	481.597	116.068	220.565	no cnx
2019_03_25_exp2_TH	3	pyramidal	2	202	159.015	Point 1	445.119	199.993	230.985	no cnx
2019_03_25_exp2_TH	3	pyramidal	2	202	159.015	Point 3	399.4	-75.3805	220.565	no cnx
2019_03_25_exp2_TH	3	pyramidal	2	202	159.015	Point 2	436.666	172.429	230.985	no cnx
2019_03_25_exp2_TH	3	pyramidal	2	202	159.015	Point 9	347.77	125.771	200.825	no cnx
2019_03_25_exp2_TH	3	pyramidal	2	202	159.015	Point 8	487.835	-22.5699	211.225	no cnx
2019_03_25_exp2_TH	3	pyramidal	2	202	159.015	Point 32	448.448	-214.85	231.415	no cnx
2019_03_25_exp2_TH	3	pyramidal	2	202	159.015	Point 28	710.023	-146.12	257.945	no cnx
2019_03_25_exp2_TH	3	pyramidal	2	202	159.015	Point 29	603.212	-0.285291	241.555	no cnx
2019_03_25_exp2_TH	3	pyramidal	2	202	159.015	Point 20	314.011	230.693	169.505	no cnx
2019_03_25_exp2_TH	3	pyramidal	2	202	159.015	Point 21	334.206	375.523	156.425	no cnx
2019_03_25_exp2_TH	3	pyramidal	2	202	159.015	Point 22	513.547	174.986	233.065	no cnx
2019_03_25_exp2_TH	3	pyramidal	2	202	159.015	Point 23	470.167	166.87	211.765	no cnx
2019_03_25_exp2_TH	3	pyramidal	2	202	159.015	Point 24	560.277	117.4	211.765	no cnx
2019_03_25_exp2_TH	3	pyramidal	2	202	159.015	Point 25	637.714	132.065	211.765	no cnx
2019_03_25_exp2_TH	3	pyramidal	2	202	159.015	Point 26	594.158	45.112	257.935	no cnx
2019_03_25_exp2_TH	3	pyramidal	2	202	159.015	Point 27	687.84	-96.0566	257.935	no cnx
2019_03_25_exp2_TH	3	pyramidal	2	202	159.015	Point 39	391.42	-402.708	207.685	no cnx
2019_03_25_exp2_TH	3	pyramidal	2	202	159.015	Point 33	506.448	-194.324	231.415	no cnx
2019_03_25_exp2_TH	3	pyramidal	2	202	159.015	Point 38	441.297	-417.638	207.685	no cnx
2019_03_25_exp2_TH	2	pyramidal	2	155	154.825	Point 11	448.145	165.858	190.315	no cnx
2019_03_25_exp2_TH	2	pyramidal	2	155	154.825	Point 10	329.468	75.6302	200.825	no cnx
2019_03_25_exp2_TH	2	pyramidal	2	155	154.825	Point 13	301.702	6.35504	190.315	no cnx
2019_03_25_exp2_TH	2	pyramidal	2	155	154.825	Point 12	379.047	79.7911	190.315	no cnx
2019_03_25_exp2_TH	2	pyramidal	2	155	154.825	Point 15	376.483	98.268	183.315	excitatory
2019_03_25_exp2_TH	2	pyramidal	2	155	154.825	Point 14	458.511	116.12	190.315	excitatory
2019_03_25_exp2_TH	2	pyramidal	2	155	154.825	Point 17	429.658	304.584	196.945	no cnx
2019_03_25_exp2_TH	2	pyramidal	2	155	154.825	Point 16	394.069	-27.6758	183.315	no cnx
2019_03_25_exp2_TH	2	pyramidal	2	155	154.825	Point 19	414.28	319.849	169.505	excitatory
2019_03_25_exp2_TH	2	pyramidal	2	155	154.825	Point 18	301.089	314.272	169.505	no cnx
2019_03_25_exp2_TH	2	pyramidal	2	155	154.825	Point 31	357.716	-238.291	231.415	no cnx
2019_03_25_exp2_TH	2	pyramidal	2	155	154.825	Point 30	395.755	-168.263	231.415	no cnx
2019_03_25_exp2_TH	2	pyramidal	2	155	154.825	Point 37	464.56	-320.967	207.685	no cnx
2019_03_25_exp2_TH	2	pyramidal	2	155	154.825	Point 36	519.573	-297.315	229.195	no cnx
2019_03_25_exp2_TH	2	pyramidal	2	155	154.825	Point 35	616.39	-266.849	231.415	no cnx
2019_03_25_exp2_TH	2	pyramidal	2	155	154.825	Point 34	428.58	-296.747	231.415	no cnx
2019_03_25_exp2_TH	2	pyramidal	2	155	154.825	Point 5	407.211	-45.4963	220.565	no cnx
2019_03_25_exp2_TH	2	pyramidal	2	155	154.825	Point 4	396.594	183.44	220.565	no cnx
2019_03_25_exp2_TH	2	pyramidal	2	155	154.825	Point 7	399.329	58.5291	211.225	no cnx
2019_03_25_exp2_TH	2	pyramidal	2	155	154.825	Point 6	480.31	131.192	220.565	no cnx
2019_03_25_exp2_TH	2	pyramidal	2	155	154.825	Point 1	443.831	215.117	230.985	no cnx
2019_03_25_exp2_TH	2	pyramidal	2	155	154.825	Point 3	398.112	-60.2556	220.565	no cnx
2019_03_25_exp2_TH	2	pyramidal	2	155	154.825	Point 2	435.378	187.554	230.985	no cnx
2019_03_25_exp2_TH	2	pyramidal	2	155	154.825	Point 9	346.482	140.896	200.825	no cnx
2019_03_25_exp2_TH	2	pyramidal	2	155	154.825	Point 8	486.547	-7.44506	211.225	no cnx
2019_03_25_exp2_TH	2	pyramidal	2	155	154.825	Point 32	447.16	-199.725	231.415	no cnx
2019_03_25_exp2_TH	2	pyramidal	2	155	154.825	Point 28	708.735	-130.996	257.945	no cnx
2019_03_25_exp2_TH	2	pyramidal	2	155	154.825	Point 29	601.924	14.8395	241.555	no cnx
2019_03_25_exp2_TH	2	pyramidal	2	155	154.825	Point 20	312.723	245.818	169.505	no cnx
2019_03_25_exp2_TH	2	pyramidal	2	155	154.825	Point 21	332.918	390.647	156.425	no cnx
2019_03_25_exp2_TH	2	pyramidal	2	155	154.825	Point 22	512.259	190.11	233.065	no cnx
2019_03_25_exp2_TH	2	pyramidal	2	155	154.825	Point 23	468.879	181.995	211.765	no cnx
2019_03_25_exp2_TH	2	pyramidal	2	155	154.825	Point 24	558.989	132.525	211.765	no cnx
2019_03_25_exp2_TH	2	pyramidal	2	155	154.825	Point 25	636.426	147.19	211.765	no cnx
2019_03_25_exp2_TH	2	pyramidal	2	155	154.825	Point 26	592.871	60.2368	257.935	no cnx
2019_03_25_exp2_TH	2	pyramidal	2	155	154.825	Point 27	686.553	-80.9317	257.935	no cnx
2019_03_25_exp2_TH	2	pyramidal	2	155	154.825	Point 39	390.132	-387.584	207.685	no cnx
2019_03_25_exp2_TH	2	pyramidal	2	155	154.825	Point 33	505.16	-179.199	231.415	excitatory
2019_03_25_exp2_TH	2	pyramidal	2	155	154.825	Point 38	440.009	-402.513	207.685	no cnx
2019_03_25_exp2_TH	0	pyramidal	2	147	151.155	Point 11	439.741	57.8668	190.315	no cnx
2019_03_25_exp2_TH	0	pyramidal	2	147	151.155	Point 10	321.065	-32.3612	200.825	no cnx
2019_03_25_exp2_TH	0	pyramidal	2	147	151.155	Point 13	293.299	-101.636	190.315	no cnx
2019_03_25_exp2_TH	0	pyramidal	2	147	151.155	Point 12	370.644	-28.2003	190.315	no cnx
2019_03_25_exp2_TH	0	pyramidal	2	147	151.155	Point 15	368.08	-9.72345	183.315	excitatory
2019_03_25_exp2_TH	0	pyramidal	2	147	151.155	Point 14	450.108	8.12908	190.315	excitatory
2019_03_25_exp2_TH	0	pyramidal	2	147	151.155	Point 17	421.254	196.593	196.945	excitatory
2019_03_25_exp2_TH	0	pyramidal	2	147	151.155	Point 16	385.666	-135.667	183.315	no cnx
2019_03_25_exp2_TH	0	pyramidal	2	147	151.155	Point 5	398.808	-153.488	220.565	no cnx
2019_03_25_exp2_TH	0	pyramidal	2	147	151.155	Point 4	388.191	75.4482	220.565	no cnx
2019_03_25_exp2_TH	0	pyramidal	2	147	151.155	Point 7	390.926	-49.4623	211.225	no cnx
2019_03_25_exp2_TH	0	pyramidal	2	147	151.155	Point 6	471.906	23.2011	220.565	excitatory
2019_03_25_exp2_TH	0	pyramidal	2	147	151.155	Point 1	435.428	107.126	230.985	no cnx
2019_03_25_exp2_TH	0	pyramidal	2	147	151.155	Point 3	389.708	-168.247	220.565	no cnx
2019_03_25_exp2_TH	0	pyramidal	2	147	151.155	Point 2	426.974	79.5621	230.985	no cnx
2019_03_25_exp2_TH	0	pyramidal	2	147	151.155	Point 9	338.079	32.9042	200.825	no cnx
2019_03_25_exp2_TH	0	pyramidal	2	147	151.155	Point 8	478.144	-115.436	211.225	excitatory
2019_03_25_exp1_TH	1	pyramidal	2	157	176.485	Point 11	349.516	193.158	171.525	no cnx
2019_03_25_exp1_TH	1	pyramidal	2	157	176.485	Point 10	356.473	281.11	171.525	no cnx
2019_03_25_exp1_TH	1	pyramidal	2	157	176.485	Point 13	264.948	212.606	171.525	no cnx
2019_03_25_exp1_TH	1	pyramidal	2	157	176.485	Point 12	358.42	254.012	171.525	no cnx
2019_03_25_exp1_TH	1	pyramidal	2	157	176.485	Point 15	415.546	166.068	164.295	no cnx
2019_03_25_exp1_TH	1	pyramidal	2	157	176.485	Point 14	416.502	126.734	171.535	excitatory
2019_03_25_exp1_TH	1	pyramidal	2	157	176.485	Point 17	343.904	119.744	164.295	no cnx
2019_03_25_exp1_TH	1	pyramidal	2	157	176.485	Point 16	343.972	96.6467	164.295	no cnx
2019_03_25_exp1_TH	1	pyramidal	2	157	176.485	Point 19	464.995	252.503	153.645	no cnx
2019_03_25_exp1_TH	1	pyramidal	2	157	176.485	Point 18	321.794	218.92	153.645	no cnx
2019_03_25_exp1_TH	1	pyramidal	2	157	176.485	Point 31	441.031	-255.687	219.295	no cnx
2019_03_25_exp1_TH	1	pyramidal	2	157	176.485	Point 30	612.502	387.136	145.565	no cnx
2019_03_25_exp1_TH	1	pyramidal	2	157	176.485	Point 37	578.383	-33.8663	233.405	no cnx
2019_03_25_exp1_TH	1	pyramidal	2	157	176.485	Point 36	568.042	-128.739	242.435	no cnx
2019_03_25_exp1_TH	1	pyramidal	2	157	176.485	Point 35	620.215	-29.8051	242.435	no cnx
2019_03_25_exp1_TH	1	pyramidal	2	157	176.485	Point 34	516.439	6.66491	242.435	no cnx
2019_03_25_exp1_TH	1	pyramidal	2	157	176.485	Point 5	373.201	178.825	198.205	no cnx
2019_03_25_exp1_TH	1	pyramidal	2	157	176.485	Point 4	408.3	232.782	198.205	no cnx
2019_03_25_exp1_TH	1	pyramidal	2	157	176.485	Point 7	414.325	173.505	193.615	no cnx
2019_03_25_exp1_TH	1	pyramidal	2	157	176.485	Point 6	412.508	159.271	198.205	no cnx
2019_03_25_exp1_TH	1	pyramidal	2	157	176.485	Point 1	402.943	175.298	215.315	no cnx
2019_03_25_exp1_TH	1	pyramidal	2	157	176.485	Point 3	358.778	11.5229	215.325	no cnx
2019_03_25_exp1_TH	1	pyramidal	2	157	176.485	Point 2	446.909	116.529	215.325	no cnx
2019_03_25_exp1_TH	1	pyramidal	2	157	176.485	Point 9	423.732	141.188	185.325	no cnx
2019_03_25_exp1_TH	1	pyramidal	2	157	176.485	Point 8	355.741	97.6456	193.615	no cnx
2019_03_25_exp1_TH	1	pyramidal	2	157	176.485	Point 32	480.665	-147.598	219.295	excitatory
2019_03_25_exp1_TH	1	pyramidal	2	157	176.485	Point 28	592.86	372.02	135.125	no cnx
2019_03_25_exp1_TH	1	pyramidal	2	157	176.485	Point 29	531.02	234.898	135.125	no cnx
2019_03_25_exp1_TH	1	pyramidal	2	157	176.485	Point 20	453.299	133.606	153.645	no cnx
2019_03_25_exp1_TH	1	pyramidal	2	157	176.485	Point 21	433.175	281.719	153.645	no cnx
2019_03_25_exp1_TH	1	pyramidal	2	157	176.485	Point 22	414.854	404.378	109.945	no cnx
2019_03_25_exp1_TH	1	pyramidal	2	157	176.485	Point 23	398.905	518.858	109.945	no cnx
2019_03_25_exp1_TH	1	pyramidal	2	157	176.485	Point 24	406.541	361.243	109.945	no cnx
2019_03_25_exp1_TH	1	pyramidal	2	157	176.485	Point 25	323.215	363.337	126.315	no cnx
2019_03_25_exp1_TH	1	pyramidal	2	157	176.485	Point 26	341.778	358.307	126.315	no cnx
2019_03_25_exp1_TH	1	pyramidal	2	157	176.485	Point 27	461.277	464.902	126.315	no cnx
2019_03_25_exp1_TH	1	pyramidal	2	157	176.485	Point 33	330.371	-175.726	215.735	no cnx
2019_01_24_exp1_TH	3	pyramidal	2	150	449.986	Point 50	291.104	-57.1208	468.826	no cnx
2019_01_24_exp1_TH	3	pyramidal	2	150	449.986	Point 11	450.811	28.5744	437.746	no cnx
2019_01_24_exp1_TH	3	pyramidal	2	150	449.986	Point 10	514.606	-131.258	437.746	no cnx
2019_01_24_exp1_TH	3	pyramidal	2	150	449.986	Point 13	321.487	-85.1632	437.756	no cnx
2019_01_24_exp1_TH	3	pyramidal	2	150	449.986	Point 12	488.822	-155.58	437.746	no cnx
2019_01_24_exp1_TH	3	pyramidal	2	150	449.986	Point 15	583.704	81.1567	488.766	no cnx
2019_01_24_exp1_TH	3	pyramidal	2	150	449.986	Point 14	408.143	24.3429	410.576	excitatory
2019_01_24_exp1_TH	3	pyramidal	2	150	449.986	Point 17	694.586	-144.279	481.066	no cnx
2019_01_24_exp1_TH	3	pyramidal	2	150	449.986	Point 16	455.563	-207.449	481.066	no cnx
2019_01_24_exp1_TH	3	pyramidal	2	150	449.986	Point 19	440.326	-107.963	476.576	no cnx
2019_01_24_exp1_TH	3	pyramidal	2	150	449.986	Point 18	487.584	-185.919	481.066	no cnx
2019_01_24_exp1_TH	3	pyramidal	2	150	449.986	Point 31	579.856	99.7331	473.916	no cnx
2019_01_24_exp1_TH	3	pyramidal	2	150	449.986	Point 30	453.678	130.174	473.916	no cnx
2019_01_24_exp1_TH	3	pyramidal	2	150	449.986	Point 37	585.615	-59.5237	425.726	no cnx
2019_01_24_exp1_TH	3	pyramidal	2	150	449.986	Point 36	612.648	-103.648	425.726	no cnx
2019_01_24_exp1_TH	3	pyramidal	2	150	449.986	Point 35	611.663	22.5033	487.386	no cnx
2019_01_24_exp1_TH	3	pyramidal	2	150	449.986	Point 34	459.93	215.513	473.916	no cnx
2019_01_24_exp1_TH	3	pyramidal	2	150	449.986	Point 5	374.731	-48.9826	459.056	no cnx
2019_01_24_exp1_TH	3	pyramidal	2	150	449.986	Point 4	405.988	41.15	466.796	no cnx
2019_01_24_exp1_TH	3	pyramidal	2	150	449.986	Point 7	478.056	-13.5421	459.056	no cnx
2019_01_24_exp1_TH	3	pyramidal	2	150	449.986	Point 6	414.174	-105.118	459.056	no cnx
2019_01_24_exp1_TH	3	pyramidal	2	150	449.986	Point 1	428.484	93.8849	481.636	no cnx
2019_01_24_exp1_TH	3	pyramidal	2	150	449.986	Point 3	451.227	-110.787	466.796	no cnx
2019_01_24_exp1_TH	3	pyramidal	2	150	449.986	Point 2	403.399	-171.036	466.796	no cnx
2019_01_24_exp1_TH	3	pyramidal	2	150	449.986	Point 9	418.345	-167.09	437.746	no cnx
2019_01_24_exp1_TH	3	pyramidal	2	150	449.986	Point 8	310.744	-54.1305	453.286	no cnx
2019_01_24_exp1_TH	3	pyramidal	2	150	449.986	Point 32	416.705	173.566	473.916	no cnx
2019_01_24_exp1_TH	3	pyramidal	2	150	449.986	Point 48	370.192	272.053	452.346	no cnx
2019_01_24_exp1_TH	3	pyramidal	2	150	449.986	Point 49	418.895	339.522	452.346	no cnx
2019_01_24_exp1_TH	3	pyramidal	2	150	449.986	Point 42	343.553	161.33	483.016	no cnx
2019_01_24_exp1_TH	3	pyramidal	2	150	449.986	Point 43	409.769	229.107	483.016	no cnx
2019_01_24_exp1_TH	3	pyramidal	2	150	449.986	Point 40	391.127	120.654	467.606	no cnx
2019_01_24_exp1_TH	3	pyramidal	2	150	449.986	Point 41	381.209	167.021	467.606	no cnx
2019_01_24_exp1_TH	3	pyramidal	2	150	449.986	Point 46	419.107	312.371	452.346	no cnx
2019_01_24_exp1_TH	3	pyramidal	2	150	449.986	Point 47	324.765	275.557	452.346	no cnx
2019_01_24_exp1_TH	3	pyramidal	2	150	449.986	Point 44	307.255	194.462	483.016	no cnx
2019_01_24_exp1_TH	3	pyramidal	2	150	449.986	Point 45	413.6	275.174	483.016	no cnx
2019_01_24_exp1_TH	3	pyramidal	2	150	449.986	Point 28	552.939	-97.2222	437.646	no cnx
2019_01_24_exp1_TH	3	pyramidal	2	150	449.986	Point 29	571.848	142.405	473.916	no cnx
2019_01_24_exp1_TH	3	pyramidal	2	150	449.986	Point 20	675.149	-104.589	476.576	no cnx
2019_01_24_exp1_TH	3	pyramidal	2	150	449.986	Point 21	370.842	-210.763	477.096	no cnx
2019_01_24_exp1_TH	3	pyramidal	2	150	449.986	Point 22	369.341	-165.993	477.096	no cnx
2019_01_24_exp1_TH	3	pyramidal	2	150	449.986	Point 23	424.637	-400.095	461.616	no cnx
2019_01_24_exp1_TH	3	pyramidal	2	150	449.986	Point 24	445.791	-313.172	461.616	no cnx
2019_01_24_exp1_TH	3	pyramidal	2	150	449.986	Point 25	428.652	-421.653	448.956	no cnx
2019_01_24_exp1_TH	3	pyramidal	2	150	449.986	Point 26	440.564	-315.898	448.956	no cnx
2019_01_24_exp1_TH	3	pyramidal	2	150	449.986	Point 27	491.668	-87.6178	437.646	no cnx
2019_01_24_exp1_TH	3	pyramidal	2	150	449.986	Point 39	363.95	121.697	425.736	no cnx
2019_01_24_exp1_TH	3	pyramidal	2	150	449.986	Point 33	639.08	163.358	473.916	no cnx
2019_01_24_exp1_TH	3	pyramidal	2	150	449.986	Point 38	399.107	26.0009	425.736	no cnx
2019_01_24_exp1_TH	2	pyramidal	2	165	454.636	Point 50	296.436	-8.2744	468.826	no cnx
2019_01_24_exp1_TH	2	pyramidal	2	165	454.636	Point 11	456.142	77.4208	437.746	no cnx
2019_01_24_exp1_TH	2	pyramidal	2	165	454.636	Point 10	519.938	-82.4114	437.746	no cnx
2019_01_24_exp1_TH	2	pyramidal	2	165	454.636	Point 13	326.819	-36.3168	437.756	no cnx
2019_01_24_exp1_TH	2	pyramidal	2	165	454.636	Point 12	494.154	-106.734	437.746	no cnx
2019_01_24_exp1_TH	2	pyramidal	2	165	454.636	Point 15	589.036	130.003	488.766	no cnx
2019_01_24_exp1_TH	2	pyramidal	2	165	454.636	Point 14	413.475	73.1893	410.576	excitatory
2019_01_24_exp1_TH	2	pyramidal	2	165	454.636	Point 17	699.918	-95.4323	481.066	no cnx
2019_01_24_exp1_TH	2	pyramidal	2	165	454.636	Point 16	460.894	-158.602	481.066	no cnx
2019_01_24_exp1_TH	2	pyramidal	2	165	454.636	Point 19	445.658	-59.1167	476.576	no cnx
2019_01_24_exp1_TH	2	pyramidal	2	165	454.636	Point 18	492.916	-137.072	481.066	no cnx
2019_01_24_exp1_TH	2	pyramidal	2	165	454.636	Point 31	585.188	148.58	473.916	no cnx
2019_01_24_exp1_TH	2	pyramidal	2	165	454.636	Point 30	459.01	179.02	473.916	no cnx
2019_01_24_exp1_TH	2	pyramidal	2	165	454.636	Point 37	590.947	-10.6773	425.726	no cnx
2019_01_24_exp1_TH	2	pyramidal	2	165	454.636	Point 36	617.979	-54.8017	425.726	no cnx
2019_01_24_exp1_TH	2	pyramidal	2	165	454.636	Point 35	616.995	71.3497	487.386	no cnx
2019_01_24_exp1_TH	2	pyramidal	2	165	454.636	Point 34	465.262	264.36	473.916	no cnx
2019_01_24_exp1_TH	2	pyramidal	2	165	454.636	Point 5	380.063	-0.13619	459.056	no cnx
2019_01_24_exp1_TH	2	pyramidal	2	165	454.636	Point 4	411.32	89.9964	466.796	no cnx
2019_01_24_exp1_TH	2	pyramidal	2	165	454.636	Point 7	483.388	35.3043	459.056	no cnx
2019_01_24_exp1_TH	2	pyramidal	2	165	454.636	Point 6	419.506	-56.2715	459.056	no cnx
2019_01_24_exp1_TH	2	pyramidal	2	165	454.636	Point 1	433.816	142.731	481.636	no cnx
2019_01_24_exp1_TH	2	pyramidal	2	165	454.636	Point 3	456.559	-61.9406	466.796	no cnx
2019_01_24_exp1_TH	2	pyramidal	2	165	454.636	Point 2	408.731	-122.189	466.796	no cnx
2019_01_24_exp1_TH	2	pyramidal	2	165	454.636	Point 9	423.677	-118.243	437.746	no cnx
2019_01_24_exp1_TH	2	pyramidal	2	165	454.636	Point 8	316.075	-5.2841	453.286	no cnx
2019_01_24_exp1_TH	2	pyramidal	2	165	454.636	Point 32	422.037	222.412	473.916	no cnx
2019_01_24_exp1_TH	2	pyramidal	2	165	454.636	Point 48	375.524	320.9	452.346	no cnx
2019_01_24_exp1_TH	2	pyramidal	2	165	454.636	Point 49	424.227	388.369	452.346	no cnx
2019_01_24_exp1_TH	2	pyramidal	2	165	454.636	Point 42	348.885	210.176	483.016	no cnx
2019_01_24_exp1_TH	2	pyramidal	2	165	454.636	Point 43	415.101	277.954	483.016	no cnx
2019_01_24_exp1_TH	2	pyramidal	2	165	454.636	Point 40	396.458	169.5	467.606	no cnx
2019_01_24_exp1_TH	2	pyramidal	2	165	454.636	Point 41	386.541	215.867	467.606	no cnx
2019_01_24_exp1_TH	2	pyramidal	2	165	454.636	Point 46	424.439	361.218	452.346	no cnx
2019_01_24_exp1_TH	2	pyramidal	2	165	454.636	Point 47	330.096	324.403	452.346	no cnx
2019_01_24_exp1_TH	2	pyramidal	2	165	454.636	Point 44	312.587	243.308	483.016	no cnx
2019_01_24_exp1_TH	2	pyramidal	2	165	454.636	Point 45	418.932	324.021	483.016	no cnx
2019_01_24_exp1_TH	2	pyramidal	2	165	454.636	Point 28	558.27	-48.3758	437.646	no cnx
2019_01_24_exp1_TH	2	pyramidal	2	165	454.636	Point 29	577.18	191.252	473.916	no cnx
2019_01_24_exp1_TH	2	pyramidal	2	165	454.636	Point 20	680.48	-55.7427	476.576	no cnx
2019_01_24_exp1_TH	2	pyramidal	2	165	454.636	Point 21	376.174	-161.916	477.096	no cnx
2019_01_24_exp1_TH	2	pyramidal	2	165	454.636	Point 22	374.673	-117.147	477.096	no cnx
2019_01_24_exp1_TH	2	pyramidal	2	165	454.636	Point 23	429.969	-351.249	461.616	no cnx
2019_01_24_exp1_TH	2	pyramidal	2	165	454.636	Point 24	451.123	-264.325	461.616	no cnx
2019_01_24_exp1_TH	2	pyramidal	2	165	454.636	Point 25	433.984	-372.807	448.956	no cnx
2019_01_24_exp1_TH	2	pyramidal	2	165	454.636	Point 26	445.896	-267.052	448.956	no cnx
2019_01_24_exp1_TH	2	pyramidal	2	165	454.636	Point 27	496.999	-38.7714	437.646	no cnx
2019_01_24_exp1_TH	2	pyramidal	2	165	454.636	Point 39	369.282	170.543	425.736	no cnx
2019_01_24_exp1_TH	2	pyramidal	2	165	454.636	Point 33	644.412	212.205	473.916	no cnx
2019_01_24_exp1_TH	2	pyramidal	2	165	454.636	Point 38	404.439	74.8473	425.736	no cnx
2019_01_24_exp1_TH	1	pyramidal	2	174	428.847	Point 11	480.665	174.603	437.746	no cnx
2019_01_24_exp1_TH	1	pyramidal	2	174	428.847	Point 10	544.461	14.7705	437.746	no cnx
2019_01_24_exp1_TH	1	pyramidal	2	174	428.847	Point 13	351.342	60.8651	437.756	no cnx
2019_01_24_exp1_TH	1	pyramidal	2	174	428.847	Point 12	518.677	-9.55218	437.746	no cnx
2019_01_24_exp1_TH	1	pyramidal	2	174	428.847	Point 15	613.559	227.185	488.766	no cnx
2019_01_24_exp1_TH	1	pyramidal	2	174	428.847	Point 14	437.998	170.371	410.576	no cnx
2019_01_24_exp1_TH	1	pyramidal	2	174	428.847	Point 17	724.441	1.74955	481.066	no cnx
2019_01_24_exp1_TH	1	pyramidal	2	174	428.847	Point 16	485.417	-61.4203	481.066	no cnx
2019_01_24_exp1_TH	1	pyramidal	2	174	428.847	Point 19	470.181	38.0652	476.576	no cnx
2019_01_24_exp1_TH	1	pyramidal	2	174	428.847	Point 18	517.439	-39.8906	481.066	no cnx
2019_01_24_exp1_TH	1	pyramidal	2	174	428.847	Point 5	404.586	97.0457	459.056	no cnx
2019_01_24_exp1_TH	1	pyramidal	2	174	428.847	Point 4	435.843	187.178	466.796	no cnx
2019_01_24_exp1_TH	1	pyramidal	2	174	428.847	Point 7	507.911	132.486	459.056	no cnx
2019_01_24_exp1_TH	1	pyramidal	2	174	428.847	Point 6	444.029	40.9104	459.056	no cnx
2019_01_24_exp1_TH	1	pyramidal	2	174	428.847	Point 1	458.339	239.913	481.636	no cnx
2019_01_24_exp1_TH	1	pyramidal	2	174	428.847	Point 3	481.082	35.2412	466.796	no cnx
2019_01_24_exp1_TH	1	pyramidal	2	174	428.847	Point 2	433.254	-25.0076	466.796	no cnx
2019_01_24_exp1_TH	1	pyramidal	2	174	428.847	Point 9	448.2	-21.0614	437.746	no cnx
2019_01_24_exp1_TH	1	pyramidal	2	174	428.847	Point 8	340.598	91.8978	453.286	no cnx
2019_01_24_exp1_TH	1	pyramidal	2	174	428.847	Point 20	705.003	41.4391	476.576	no cnx
2019_01_24_exp1_TH	1	pyramidal	2	174	428.847	Point 21	400.697	-64.7346	477.096	no cnx
2019_01_24_exp1_TH	1	pyramidal	2	174	428.847	Point 22	399.196	-19.965	477.096	no cnx
2019_01_24_exp1_TH	1	pyramidal	2	174	428.847	Point 23	454.492	-254.067	461.616	no cnx
2019_01_24_exp1_TH	1	pyramidal	2	174	428.847	Point 24	475.646	-167.143	461.616	no cnx
2019_01_24_exp1_TH	1	pyramidal	2	174	428.847	Point 25	458.507	-275.625	448.956	no cnx
2019_01_24_exp1_TH	1	pyramidal	2	174	428.847	Point 26	470.419	-169.87	448.956	no cnx
2019_01_23_exp2_TH	3	pyramidal	2	239	525.456	Point 11	603.469	64.3847	504.626	no cnx
2019_01_23_exp2_TH	3	pyramidal	2	239	525.456	Point 10	644.145	1.12486	504.626	no cnx
2019_01_23_exp2_TH	3	pyramidal	2	239	525.456	Point 13	412.21	-7.41628	485.636	no cnx
2019_01_23_exp2_TH	3	pyramidal	2	239	525.456	Point 12	462.401	-107.41	497.156	no cnx
2019_01_23_exp2_TH	3	pyramidal	2	239	525.456	Point 15	385.983	-53.4653	493.406	excitatory
2019_01_23_exp2_TH	3	pyramidal	2	239	525.456	Point 14	522.974	28.3925	485.636	no cnx
2019_01_23_exp2_TH	3	pyramidal	2	239	525.456	Point 17	427.075	-78.7909	493.406	no cnx
2019_01_23_exp2_TH	3	pyramidal	2	239	525.456	Point 16	618.156	-84.2508	485.636	no cnx
2019_01_23_exp2_TH	3	pyramidal	2	239	525.456	Point 19	452.737	-27.6988	487.276	no cnx
2019_01_23_exp2_TH	3	pyramidal	2	239	525.456	Point 18	387.496	-269.091	487.276	no cnx
2019_01_23_exp2_TH	3	pyramidal	2	239	525.456	Point 31	517.214	15.2455	481.906	no cnx
2019_01_23_exp2_TH	3	pyramidal	2	239	525.456	Point 30	638.52	-51.3927	481.906	no cnx
2019_01_23_exp2_TH	3	pyramidal	2	239	525.456	Point 5	505.436	-44.584	488.016	no cnx
2019_01_23_exp2_TH	3	pyramidal	2	239	525.456	Point 4	389.202	-139.6	488.016	no cnx
2019_01_23_exp2_TH	3	pyramidal	2	239	525.456	Point 7	421.649	-111.312	488.016	no cnx
2019_01_23_exp2_TH	3	pyramidal	2	239	525.456	Point 6	468.543	-121.088	488.016	no cnx
2019_01_23_exp2_TH	3	pyramidal	2	239	525.456	Point 1	436.015	-233.387	502.846	no cnx
2019_01_23_exp2_TH	3	pyramidal	2	239	525.456	Point 3	493.491	-68.5755	488.016	no cnx
2019_01_23_exp2_TH	3	pyramidal	2	239	525.456	Point 2	446.211	38.3059	502.846	no cnx
2019_01_23_exp2_TH	3	pyramidal	2	239	525.456	Point 9	657.344	77.715	512.896	no cnx
2019_01_23_exp2_TH	3	pyramidal	2	239	525.456	Point 8	788.27	-29.1693	512.896	no cnx
2019_01_23_exp2_TH	3	pyramidal	2	239	525.456	Point 28	481.466	-214.657	460.166	no cnx
2019_01_23_exp2_TH	3	pyramidal	2	239	525.456	Point 29	526.019	-1.45028	481.906	no cnx
2019_01_23_exp2_TH	3	pyramidal	2	239	525.456	Point 20	415.999	-273.72	529.406	no cnx
2019_01_23_exp2_TH	3	pyramidal	2	239	525.456	Point 21	628.254	-308.604	529.406	no cnx
2019_01_23_exp2_TH	3	pyramidal	2	239	525.456	Point 22	496.376	-331.913	505.726	no cnx
2019_01_23_exp2_TH	3	pyramidal	2	239	525.456	Point 23	614.856	-117.775	505.726	no cnx
2019_01_23_exp2_TH	3	pyramidal	2	239	525.456	Point 24	642.54	-234.042	470.416	no cnx
2019_01_23_exp2_TH	3	pyramidal	2	239	525.456	Point 25	474.149	-321.215	460.166	no cnx
2019_01_23_exp2_TH	3	pyramidal	2	239	525.456	Point 26	572.23	-286.746	460.166	no cnx
2019_01_23_exp2_TH	3	pyramidal	2	239	525.456	Point 27	437.548	-171.341	460.166	excitatory
2019_01_23_exp2_TH	2	pyramidal	2	248	515.426	Point 11	585.994	229.406	504.626	no cnx
2019_01_23_exp2_TH	2	pyramidal	2	248	515.426	Point 10	626.67	166.147	504.626	no cnx
2019_01_23_exp2_TH	2	pyramidal	2	248	515.426	Point 13	394.735	157.605	485.636	no cnx
2019_01_23_exp2_TH	2	pyramidal	2	248	515.426	Point 12	444.926	57.6117	497.156	excitatory
2019_01_23_exp2_TH	2	pyramidal	2	248	515.426	Point 15	368.509	111.556	493.406	no cnx
2019_01_23_exp2_TH	2	pyramidal	2	248	515.426	Point 14	505.5	193.414	485.636	no cnx
2019_01_23_exp2_TH	2	pyramidal	2	248	515.426	Point 17	409.6	86.2308	493.406	no cnx
2019_01_23_exp2_TH	2	pyramidal	2	248	515.426	Point 16	600.682	80.7708	485.636	no cnx
2019_01_23_exp2_TH	2	pyramidal	2	248	515.426	Point 19	435.262	137.323	487.276	no cnx
2019_01_23_exp2_TH	2	pyramidal	2	248	515.426	Point 18	370.022	-104.069	487.276	no cnx
2019_01_23_exp2_TH	2	pyramidal	2	248	515.426	Point 31	499.739	180.267	481.906	no cnx
2019_01_23_exp2_TH	2	pyramidal	2	248	515.426	Point 30	621.046	113.629	481.906	no cnx
2019_01_23_exp2_TH	2	pyramidal	2	248	515.426	Point 5	487.962	120.438	488.016	no cnx
2019_01_23_exp2_TH	2	pyramidal	2	248	515.426	Point 4	371.727	25.4217	488.016	no cnx
2019_01_23_exp2_TH	2	pyramidal	2	248	515.426	Point 7	404.174	53.7094	488.016	no cnx
2019_01_23_exp2_TH	2	pyramidal	2	248	515.426	Point 6	451.068	43.9334	488.016	excitatory
2019_01_23_exp2_TH	2	pyramidal	2	248	515.426	Point 1	418.54	-68.3654	502.846	no cnx
2019_01_23_exp2_TH	2	pyramidal	2	248	515.426	Point 3	476.016	96.4462	488.016	excitatory
2019_01_23_exp2_TH	2	pyramidal	2	248	515.426	Point 2	428.736	203.327	502.846	no cnx
2019_01_23_exp2_TH	2	pyramidal	2	248	515.426	Point 9	639.87	242.737	512.896	no cnx
2019_01_23_exp2_TH	2	pyramidal	2	248	515.426	Point 8	770.795	135.852	512.896	no cnx
2019_01_23_exp2_TH	2	pyramidal	2	248	515.426	Point 28	463.991	-49.6356	460.166	no cnx
2019_01_23_exp2_TH	2	pyramidal	2	248	515.426	Point 29	508.544	163.571	481.906	no cnx
2019_01_23_exp2_TH	2	pyramidal	2	248	515.426	Point 20	398.524	-108.699	529.406	no cnx
2019_01_23_exp2_TH	2	pyramidal	2	248	515.426	Point 21	610.779	-143.582	529.406	no cnx
2019_01_23_exp2_TH	2	pyramidal	2	248	515.426	Point 22	478.902	-166.891	505.726	no cnx
2019_01_23_exp2_TH	2	pyramidal	2	248	515.426	Point 23	597.381	47.2462	505.726	no cnx
2019_01_23_exp2_TH	2	pyramidal	2	248	515.426	Point 24	625.065	-69.0207	470.416	no cnx
2019_01_23_exp2_TH	2	pyramidal	2	248	515.426	Point 25	456.674	-156.193	460.166	no cnx
2019_01_23_exp2_TH	2	pyramidal	2	248	515.426	Point 26	554.756	-121.724	460.166	no cnx
2019_01_23_exp2_TH	2	pyramidal	2	248	515.426	Point 27	420.074	-6.31917	460.166	no cnx
2019_01_23_exp2_TH	1	pyramidal	2	214	503.896	Point 11	578.842	323.649	504.626	no cnx
2019_01_23_exp2_TH	1	pyramidal	2	214	503.896	Point 10	619.518	260.389	504.626	no cnx
2019_01_23_exp2_TH	1	pyramidal	2	214	503.896	Point 13	387.583	251.848	485.636	no cnx
2019_01_23_exp2_TH	1	pyramidal	2	214	503.896	Point 12	437.774	151.854	497.156	excitatory
2019_01_23_exp2_TH	1	pyramidal	2	214	503.896	Point 15	361.356	205.799	493.406	no cnx
2019_01_23_exp2_TH	1	pyramidal	2	214	503.896	Point 14	498.347	287.657	485.636	no cnx
2019_01_23_exp2_TH	1	pyramidal	2	214	503.896	Point 17	402.447	180.473	493.406	no cnx
2019_01_23_exp2_TH	1	pyramidal	2	214	503.896	Point 16	593.529	175.013	485.636	no cnx
2019_01_23_exp2_TH	1	pyramidal	2	214	503.896	Point 19	428.11	231.565	487.276	no cnx
2019_01_23_exp2_TH	1	pyramidal	2	214	503.896	Point 18	362.869	-9.82649	487.276	no cnx
2019_01_23_exp2_TH	1	pyramidal	2	214	503.896	Point 31	492.586	274.51	481.906	no cnx
2019_01_23_exp2_TH	1	pyramidal	2	214	503.896	Point 30	613.893	207.871	481.906	no cnx
2019_01_23_exp2_TH	1	pyramidal	2	214	503.896	Point 5	480.809	214.68	488.016	no cnx
2019_01_23_exp2_TH	1	pyramidal	2	214	503.896	Point 4	364.575	119.664	488.016	no cnx
2019_01_23_exp2_TH	1	pyramidal	2	214	503.896	Point 7	397.022	147.952	488.016	no cnx
2019_01_23_exp2_TH	1	pyramidal	2	214	503.896	Point 6	443.915	138.176	488.016	no cnx
2019_01_23_exp2_TH	1	pyramidal	2	214	503.896	Point 1	411.388	25.8771	502.846	no cnx
2019_01_23_exp2_TH	1	pyramidal	2	214	503.896	Point 3	468.864	190.689	488.016	excitatory
2019_01_23_exp2_TH	1	pyramidal	2	214	503.896	Point 2	421.584	297.57	502.846	no cnx
2019_01_23_exp2_TH	1	pyramidal	2	214	503.896	Point 9	632.717	336.979	512.896	no cnx
2019_01_23_exp2_TH	1	pyramidal	2	214	503.896	Point 8	763.642	230.095	512.896	no cnx
2019_01_23_exp2_TH	1	pyramidal	2	214	503.896	Point 28	456.839	44.6069	460.166	no cnx
2019_01_23_exp2_TH	1	pyramidal	2	214	503.896	Point 29	501.392	257.814	481.906	no cnx
2019_01_23_exp2_TH	1	pyramidal	2	214	503.896	Point 20	391.371	-14.4561	529.406	no cnx
2019_01_23_exp2_TH	1	pyramidal	2	214	503.896	Point 21	603.627	-49.34	529.406	no cnx
2019_01_23_exp2_TH	1	pyramidal	2	214	503.896	Point 22	471.749	-72.6484	505.726	no cnx
2019_01_23_exp2_TH	1	pyramidal	2	214	503.896	Point 23	590.229	141.489	505.726	no cnx
2019_01_23_exp2_TH	1	pyramidal	2	214	503.896	Point 24	617.913	25.2218	470.416	no cnx
2019_01_23_exp2_TH	1	pyramidal	2	214	503.896	Point 25	449.521	-61.9505	460.166	no cnx
2019_01_23_exp2_TH	1	pyramidal	2	214	503.896	Point 26	547.603	-27.4818	460.166	no cnx
2019_01_23_exp2_TH	1	pyramidal	2	214	503.896	Point 27	412.921	87.9233	460.166	no cnx
2019_01_23_exp2_TH	0	pyramidal	2	317	530.118	Point 11	603.358	348.524	504.626	no cnx
2019_01_23_exp2_TH	0	pyramidal	2	317	530.118	Point 10	644.034	285.264	504.626	no cnx
2019_01_23_exp2_TH	0	pyramidal	2	317	530.118	Point 13	412.099	276.723	485.636	no cnx
2019_01_23_exp2_TH	0	pyramidal	2	317	530.118	Point 12	462.29	176.73	497.156	no cnx
2019_01_23_exp2_TH	0	pyramidal	2	317	530.118	Point 15	385.872	230.674	493.406	excitatory
2019_01_23_exp2_TH	0	pyramidal	2	317	530.118	Point 14	522.863	312.532	485.636	no cnx
2019_01_23_exp2_TH	0	pyramidal	2	317	530.118	Point 17	426.964	205.349	493.406	no cnx
2019_01_23_exp2_TH	0	pyramidal	2	317	530.118	Point 16	618.045	199.889	485.636	no cnx
2019_01_23_exp2_TH	0	pyramidal	2	317	530.118	Point 19	452.626	256.441	487.276	no cnx
2019_01_23_exp2_TH	0	pyramidal	2	317	530.118	Point 18	387.385	15.0489	487.276	no cnx
2019_01_23_exp2_TH	0	pyramidal	2	317	530.118	Point 5	505.325	239.556	488.016	no cnx
2019_01_23_exp2_TH	0	pyramidal	2	317	530.118	Point 4	389.091	144.54	488.016	no cnx
2019_01_23_exp2_TH	0	pyramidal	2	317	530.118	Point 7	421.538	172.827	488.016	no cnx
2019_01_23_exp2_TH	0	pyramidal	2	317	530.118	Point 6	468.432	163.051	488.016	no cnx
2019_01_23_exp2_TH	0	pyramidal	2	317	530.118	Point 1	435.904	50.7525	502.846	no cnx
2019_01_23_exp2_TH	0	pyramidal	2	317	530.118	Point 3	493.38	215.564	488.016	excitatory
2019_01_23_exp2_TH	0	pyramidal	2	317	530.118	Point 2	446.1	322.445	502.846	no cnx
2019_01_23_exp2_TH	0	pyramidal	2	317	530.118	Point 9	657.233	361.854	512.896	no cnx
2019_01_23_exp2_TH	0	pyramidal	2	317	530.118	Point 8	788.158	254.97	512.896	no cnx
2019_01_23_exp2_TH	0	pyramidal	2	317	530.118	Point 20	415.888	10.4192	529.406	no cnx
2019_01_23_exp2_TH	0	pyramidal	2	317	530.118	Point 21	628.143	-24.4646	529.406	no cnx
2019_01_23_exp2_TH	0	pyramidal	2	317	530.118	Point 22	496.265	-47.773	505.726	no cnx
2019_01_23_exp2_TH	0	pyramidal	2	317	530.118	Point 23	614.745	166.364	505.726	no cnx
2019_01_23_exp2_TH	0	pyramidal	2	317	530.118	Point 24	642.429	50.0972	470.416	no cnx
2019_01_23_exp1_TH	3	pyramidal	2	278	625.456	Point 5	423.184	135.774	584.366	excitatory
2019_01_23_exp1_TH	3	pyramidal	2	278	625.456	Point 4	391.561	108.709	587.456	no cnx
2019_01_23_exp1_TH	3	pyramidal	2	278	625.456	Point 7	347.159	125.701	577.106	no cnx
2019_01_23_exp1_TH	3	pyramidal	2	278	625.456	Point 6	411.767	51.6386	584.366	excitatory
2019_01_23_exp1_TH	3	pyramidal	2	278	625.456	Point 1	458.351	246.296	591.526	no cnx
2019_01_23_exp1_TH	3	pyramidal	2	278	625.456	Point 3	377.343	236.755	587.456	no cnx
2019_01_23_exp1_TH	3	pyramidal	2	278	625.456	Point 2	341.031	174.881	591.526	excitatory
2019_01_23_exp1_TH	3	pyramidal	2	278	625.456	Point 9	583.331	172.328	607.411	no cnx
2019_01_23_exp1_TH	3	pyramidal	2	278	625.456	Point 8	320.063	114.493	577.106	no cnx
2019_01_23_exp1_TH	1	pyramidal	2	161	603.896	Point 5	423.267	-143.462	584.366	no cnx
2019_01_23_exp1_TH	1	pyramidal	2	161	603.896	Point 4	391.644	-170.526	587.456	no cnx
2019_01_23_exp1_TH	1	pyramidal	2	161	603.896	Point 7	347.242	-153.534	577.106	no cnx
2019_01_23_exp1_TH	1	pyramidal	2	161	603.896	Point 6	411.849	-227.597	584.366	no cnx
2019_01_23_exp1_TH	1	pyramidal	2	161	603.896	Point 1	458.434	-32.9393	591.526	no cnx
2019_01_23_exp1_TH	1	pyramidal	2	161	603.896	Point 3	377.426	-42.4804	587.456	no cnx
2019_01_23_exp1_TH	1	pyramidal	2	161	603.896	Point 2	341.114	-104.354	591.526	no cnx
2019_01_23_exp1_TH	1	pyramidal	2	161	603.896	Point 9	583.414	-106.907	607.411	no cnx
2019_01_23_exp1_TH	1	pyramidal	2	161	603.896	Point 8	320.145	-164.742	577.106	no cnx
2019_01_23_exp1_TH	0	pyramidal	2	242	630.118	Point 11	612.362	-82.3008	585.071	no cnx
2019_01_23_exp1_TH	0	pyramidal	2	242	630.118	Point 10	557.091	-315.041	599.441	no cnx
2019_01_23_exp1_TH	0	pyramidal	2	242	630.118	Point 13	536.81	-208.859	562.031	no cnx
2019_01_23_exp1_TH	0	pyramidal	2	242	630.118	Point 12	625.186	-36.5173	562.031	no cnx
2019_01_23_exp1_TH	0	pyramidal	2	242	630.118	Point 15	315.174	-215.407	561.991	no cnx
2019_01_23_exp1_TH	0	pyramidal	2	242	630.118	Point 14	404.581	-184.56	561.991	no cnx
2019_01_23_exp1_TH	0	pyramidal	2	242	630.118	Point 17	552.061	-275.618	597.191	no cnx
2019_01_23_exp1_TH	0	pyramidal	2	242	630.118	Point 16	443.323	-214.28	565.911	excitatory
2019_01_23_exp1_TH	0	pyramidal	2	242	630.118	Point 19	384.313	-85.6404	574.341	no cnx
2019_01_23_exp1_TH	0	pyramidal	2	242	630.118	Point 18	468.183	-360.815	597.191	no cnx
2019_01_23_exp1_TH	0	pyramidal	2	242	630.118	Point 31	413.104	70.4531	528.811	no cnx
2019_01_23_exp1_TH	0	pyramidal	2	242	630.118	Point 30	396.425	145.322	528.811	no cnx
2019_01_23_exp1_TH	0	pyramidal	2	242	630.118	Point 5	422.872	-244.595	584.366	excitatory
2019_01_23_exp1_TH	0	pyramidal	2	242	630.118	Point 4	391.249	-271.66	587.456	no cnx
2019_01_23_exp1_TH	0	pyramidal	2	242	630.118	Point 7	346.847	-254.668	577.106	no cnx
2019_01_23_exp1_TH	0	pyramidal	2	242	630.118	Point 6	411.454	-328.73	584.366	no cnx
2019_01_23_exp1_TH	0	pyramidal	2	242	630.118	Point 1	458.039	-134.073	591.526	no cnx
2019_01_23_exp1_TH	0	pyramidal	2	242	630.118	Point 3	377.031	-143.614	587.456	no cnx
2019_01_23_exp1_TH	0	pyramidal	2	242	630.118	Point 2	340.719	-205.488	591.526	no cnx
2019_01_23_exp1_TH	0	pyramidal	2	242	630.118	Point 9	583.019	-208.041	607.411	excitatory
2019_01_23_exp1_TH	0	pyramidal	2	242	630.118	Point 8	319.751	-265.876	577.106	no cnx
2019_01_23_exp1_TH	0	pyramidal	2	242	630.118	Point 32	361.253	181.723	528.811	no cnx
2019_01_23_exp1_TH	0	pyramidal	2	242	630.118	Point 28	335.61	119.283	528.811	no cnx
2019_01_23_exp1_TH	0	pyramidal	2	242	630.118	Point 29	298.869	-0.794666	528.811	no cnx
2019_01_23_exp1_TH	0	pyramidal	2	242	630.118	Point 20	400.458	-191.09	574.341	no cnx
2019_01_23_exp1_TH	0	pyramidal	2	242	630.118	Point 21	371.584	-92.7296	574.341	excitatory
2019_01_23_exp1_TH	0	pyramidal	2	242	630.118	Point 22	307.954	-223.685	574.341	no cnx
2019_01_23_exp1_TH	0	pyramidal	2	242	630.118	Point 23	293.927	130.146	556.131	no cnx
2019_01_23_exp1_TH	0	pyramidal	2	242	630.118	Point 24	293.239	-25.6162	556.131	no cnx
2019_01_23_exp1_TH	0	pyramidal	2	242	630.118	Point 25	317.996	145.917	556.131	no cnx
2019_01_23_exp1_TH	0	pyramidal	2	242	630.118	Point 26	342.94	71.3277	556.131	no cnx
2019_01_23_exp1_TH	0	pyramidal	2	242	630.118	Point 27	298.456	109.817	556.131	no cnx
2018_12_03_exp1_TH	2	pyramidal	2	143	568.096	Point 11	384.779	307.14	506.676	no cnx
2018_12_03_exp1_TH	2	pyramidal	2	143	568.096	Point 10	264.482	349.994	506.676	no cnx
2018_12_03_exp1_TH	2	pyramidal	2	143	568.096	Point 13	392.316	301.915	488.006	no cnx
2018_12_03_exp1_TH	2	pyramidal	2	143	568.096	Point 12	313.245	346.654	488.006	no cnx
2018_12_03_exp1_TH	2	pyramidal	2	143	568.096	Point 15	459.325	137.833	581.316	no cnx
2018_12_03_exp1_TH	2	pyramidal	2	143	568.096	Point 14	515.923	132.141	581.316	no cnx
2018_12_03_exp1_TH	2	pyramidal	2	143	568.096	Point 17	320.944	48.875	616.096	no cnx
2018_12_03_exp1_TH	2	pyramidal	2	143	568.096	Point 16	520.355	167.55	581.316	no cnx
2018_12_03_exp1_TH	2	pyramidal	2	143	568.096	Point 19	334.675	17.6889	616.096	no cnx
2018_12_03_exp1_TH	2	pyramidal	2	143	568.096	Point 18	429.119	64.1058	616.096	excitatory
2018_12_03_exp1_TH	2	pyramidal	2	143	568.096	Point 31	618.868	280.569	583.846	no cnx
2018_12_03_exp1_TH	2	pyramidal	2	143	568.096	Point 30	699.778	354.522	623.146	no cnx
2018_12_03_exp1_TH	2	pyramidal	2	143	568.096	Point 37	91.7046	116.302	552.796	no cnx
2018_12_03_exp1_TH	2	pyramidal	2	143	568.096	Point 36	278.013	-139.221	669.636	no cnx
2018_12_03_exp1_TH	2	pyramidal	2	143	568.096	Point 35	706.818	250.998	583.856	no cnx
2018_12_03_exp1_TH	2	pyramidal	2	143	568.096	Point 34	586.149	317.612	583.856	no cnx
2018_12_03_exp1_TH	2	pyramidal	2	143	568.096	Point 5	381.664	110.098	540.276	no cnx
2018_12_03_exp1_TH	2	pyramidal	2	143	568.096	Point 4	425.255	187.708	540.276	no cnx
2018_12_03_exp1_TH	2	pyramidal	2	143	568.096	Point 7	289.638	102.553	519.156	no cnx
2018_12_03_exp1_TH	2	pyramidal	2	143	568.096	Point 6	344.103	219.518	519.156	no cnx
2018_12_03_exp1_TH	2	pyramidal	2	143	568.096	Point 1	301.956	287.098	548.126	no cnx
2018_12_03_exp1_TH	2	pyramidal	2	143	568.096	Point 3	343.977	151.94	540.276	no cnx
2018_12_03_exp1_TH	2	pyramidal	2	143	568.096	Point 2	424.281	168.803	540.276	no cnx
2018_12_03_exp1_TH	2	pyramidal	2	143	568.096	Point 9	257.774	133.091	519.156	no cnx
2018_12_03_exp1_TH	2	pyramidal	2	143	568.096	Point 8	373.663	112.723	519.156	no cnx
2018_12_03_exp1_TH	2	pyramidal	2	143	568.096	Point 32	732.143	395.861	583.846	no cnx
2018_12_03_exp1_TH	2	pyramidal	2	143	568.096	Point 28	616.147	185.293	681.566	no cnx
2018_12_03_exp1_TH	2	pyramidal	2	143	568.096	Point 29	619.289	75.9027	642.576	no cnx
2018_12_03_exp1_TH	2	pyramidal	2	143	568.096	Point 20	225.977	116.913	616.096	no cnx
2018_12_03_exp1_TH	2	pyramidal	2	143	568.096	Point 21	289.857	113.789	616.096	no cnx
2018_12_03_exp1_TH	2	pyramidal	2	143	568.096	Point 22	316.762	-22.0248	637.366	no cnx
2018_12_03_exp1_TH	2	pyramidal	2	143	568.096	Point 24	470.043	67.8251	651.796	excitatory
2018_12_03_exp1_TH	2	pyramidal	2	143	568.096	Point 25	548.661	142.271	651.796	excitatory
2018_12_03_exp1_TH	2	pyramidal	2	143	568.096	Point 26	599.463	193.586	681.566	no cnx
2018_12_03_exp1_TH	2	pyramidal	2	143	568.096	Point 27	500.162	-11.7633	681.566	no cnx
2018_12_03_exp1_TH	2	pyramidal	2	143	568.096	Point 33	666.792	314.943	583.856	no cnx
2018_12_03_exp1_TH	1	pyramidal	2	97	574.626	Point 11	399.888	162.591	506.676	no cnx
2018_12_03_exp1_TH	1	pyramidal	2	97	574.626	Point 10	279.59	205.446	506.676	no cnx
2018_12_03_exp1_TH	1	pyramidal	2	97	574.626	Point 13	407.425	157.366	488.006	no cnx
2018_12_03_exp1_TH	1	pyramidal	2	97	574.626	Point 12	328.354	202.105	488.006	no cnx
2018_12_03_exp1_TH	1	pyramidal	2	97	574.626	Point 15	474.433	-6.71531	581.316	no cnx
2018_12_03_exp1_TH	1	pyramidal	2	97	574.626	Point 14	531.031	-12.4077	581.316	no cnx
2018_12_03_exp1_TH	1	pyramidal	2	97	574.626	Point 17	336.052	-95.6736	616.096	no cnx
2018_12_03_exp1_TH	1	pyramidal	2	97	574.626	Point 16	535.463	23.0017	581.316	no cnx
2018_12_03_exp1_TH	1	pyramidal	2	97	574.626	Point 19	349.783	-126.86	616.096	no cnx
2018_12_03_exp1_TH	1	pyramidal	2	97	574.626	Point 18	444.227	-80.4427	616.096	excitatory
2018_12_03_exp1_TH	1	pyramidal	2	97	574.626	Point 5	396.772	-34.4502	540.276	no cnx
2018_12_03_exp1_TH	1	pyramidal	2	97	574.626	Point 4	440.363	43.1592	540.276	no cnx
2018_12_03_exp1_TH	1	pyramidal	2	97	574.626	Point 7	304.746	-41.9956	519.156	no cnx
2018_12_03_exp1_TH	1	pyramidal	2	97	574.626	Point 6	359.211	74.9697	519.156	no cnx
2018_12_03_exp1_TH	1	pyramidal	2	97	574.626	Point 1	317.065	142.55	548.126	no cnx
2018_12_03_exp1_TH	1	pyramidal	2	97	574.626	Point 3	359.085	7.39161	540.276	excitatory
2018_12_03_exp1_TH	1	pyramidal	2	97	574.626	Point 2	439.389	24.2549	540.276	excitatory
2018_12_03_exp1_TH	1	pyramidal	2	97	574.626	Point 9	272.882	-11.4576	519.156	no cnx
2018_12_03_exp1_TH	1	pyramidal	2	97	574.626	Point 8	388.771	-31.8253	519.156	no cnx
2018_12_03_exp1_TH	1	pyramidal	2	97	574.626	Point 20	241.085	-27.6357	616.096	no cnx
2018_12_03_exp1_TH	1	pyramidal	2	97	574.626	Point 21	304.965	-30.7592	616.096	no cnx
2018_12_03_exp1_TH	1	pyramidal	2	97	574.626	Point 22	331.87	-166.573	637.366	no cnx
2018_12_03_exp1_TH	0	pyramidal	2	222	567.726	Point 11	403.421	48.4942	506.676	no cnx
2018_12_03_exp1_TH	0	pyramidal	2	222	567.726	Point 10	283.124	91.3488	506.676	no cnx
2018_12_03_exp1_TH	0	pyramidal	2	222	567.726	Point 13	410.958	43.269	488.006	no cnx
2018_12_03_exp1_TH	0	pyramidal	2	222	567.726	Point 12	331.887	88.0085	488.006	no cnx
2018_12_03_exp1_TH	0	pyramidal	2	222	567.726	Point 15	477.966	-120.812	581.316	no cnx
2018_12_03_exp1_TH	0	pyramidal	2	222	567.726	Point 14	534.564	-126.505	581.316	no cnx
2018_12_03_exp1_TH	0	pyramidal	2	222	567.726	Point 17	339.586	-209.771	616.096	no cnx
2018_12_03_exp1_TH	0	pyramidal	2	222	567.726	Point 16	538.997	-91.0952	581.316	no cnx
2018_12_03_exp1_TH	0	pyramidal	2	222	567.726	Point 19	353.316	-240.957	616.096	no cnx
2018_12_03_exp1_TH	0	pyramidal	2	222	567.726	Point 18	447.761	-194.54	616.096	excitatory
2018_12_03_exp1_TH	0	pyramidal	2	222	567.726	Point 30	718.42	95.8761	623.146	no cnx
2018_12_03_exp1_TH	0	pyramidal	2	222	567.726	Point 5	400.306	-148.547	540.276	no cnx
2018_12_03_exp1_TH	0	pyramidal	2	222	567.726	Point 4	443.896	-70.9378	540.276	no cnx
2018_12_03_exp1_TH	0	pyramidal	2	222	567.726	Point 7	308.279	-156.093	519.156	no cnx
2018_12_03_exp1_TH	0	pyramidal	2	222	567.726	Point 6	362.744	-39.1272	519.156	no cnx
2018_12_03_exp1_TH	0	pyramidal	2	222	567.726	Point 1	320.598	28.453	548.126	no cnx
2018_12_03_exp1_TH	0	pyramidal	2	222	567.726	Point 3	362.618	-106.705	540.276	excitatory
2018_12_03_exp1_TH	0	pyramidal	2	222	567.726	Point 2	442.922	-89.842	540.276	excitatory
2018_12_03_exp1_TH	0	pyramidal	2	222	567.726	Point 9	276.415	-125.555	519.156	no cnx
2018_12_03_exp1_TH	0	pyramidal	2	222	567.726	Point 8	392.304	-145.922	519.156	no cnx
2018_12_03_exp1_TH	0	pyramidal	2	222	567.726	Point 28	634.789	-73.3528	681.566	no cnx
2018_12_03_exp1_TH	0	pyramidal	2	222	567.726	Point 29	637.931	-182.743	642.576	no cnx
2018_12_03_exp1_TH	0	pyramidal	2	222	567.726	Point 20	244.618	-141.733	616.096	no cnx
2018_12_03_exp1_TH	0	pyramidal	2	222	567.726	Point 21	308.499	-144.856	616.096	no cnx
2018_12_03_exp1_TH	0	pyramidal	2	222	567.726	Point 22	335.404	-280.67	637.366	excitatory
2018_12_03_exp1_TH	0	pyramidal	2	222	567.726	Point 24	488.685	-190.82	651.796	no cnx
2018_12_03_exp1_TH	0	pyramidal	2	222	567.726	Point 25	567.303	-116.374	651.796	no cnx
2018_12_03_exp1_TH	0	pyramidal	2	222	567.726	Point 26	618.105	-65.0591	681.566	no cnx
2018_12_03_exp1_TH	0	pyramidal	2	222	567.726	Point 27	518.803	-270.409	681.566	no cnx
2018_11_30_exp2_TH	0	pyramidal	2	185	779.506	Point 11	473.045	20.1581	730.776	no cnx
2018_11_30_exp2_TH	0	pyramidal	2	185	779.506	Point 10	413.926	42.5	730.776	no cnx
2018_11_30_exp2_TH	0	pyramidal	2	185	779.506	Point 13	625.466	97.1082	822.336	no cnx
2018_11_30_exp2_TH	0	pyramidal	2	185	779.506	Point 12	280.012	44.5591	730.776	no cnx
2018_11_30_exp2_TH	0	pyramidal	2	185	779.506	Point 15	667.499	56.7165	813.236	no cnx
2018_11_30_exp2_TH	0	pyramidal	2	185	779.506	Point 14	594.776	29.7323	822.336	excitatory
2018_11_30_exp2_TH	0	pyramidal	2	185	779.506	Point 17	520.003	-254.647	790.896	excitatory
2018_11_30_exp2_TH	0	pyramidal	2	185	779.506	Point 16	405.6	-231.368	790.896	no cnx
2018_11_30_exp2_TH	0	pyramidal	2	185	779.506	Point 19	478.069	-276.173	790.896	no cnx
2018_11_30_exp2_TH	0	pyramidal	2	185	779.506	Point 18	611.609	-136.933	790.896	no cnx
2018_11_30_exp2_TH	0	pyramidal	2	185	779.506	Point 31	272.568	-199.849	758.806	no cnx
2018_11_30_exp2_TH	0	pyramidal	2	185	779.506	Point 35	287.531	-343.536	758.806	no cnx
2018_11_30_exp2_TH	0	pyramidal	2	185	779.506	Point 34	418.608	-93.3858	758.806	no cnx
2018_11_30_exp2_TH	0	pyramidal	2	185	779.506	Point 5	427.399	-87.036	748.496	no cnx
2018_11_30_exp2_TH	0	pyramidal	2	185	779.506	Point 4	440.46	76.1833	745.406	excitatory
2018_11_30_exp2_TH	0	pyramidal	2	185	779.506	Point 7	292.545	-65.0517	739.646	no cnx
2018_11_30_exp2_TH	0	pyramidal	2	185	779.506	Point 6	442.896	-83.1321	739.646	no cnx
2018_11_30_exp2_TH	0	pyramidal	2	185	779.506	Point 1	311.075	85.4652	769.256	no cnx
2018_11_30_exp2_TH	0	pyramidal	2	185	779.506	Point 3	259.679	-99.8214	753.266	no cnx
2018_11_30_exp2_TH	0	pyramidal	2	185	779.506	Point 2	420.118	-27.2272	769.256	no cnx
2018_11_30_exp2_TH	0	pyramidal	2	185	779.506	Point 9	293.97	-139.004	739.646	no cnx
2018_11_30_exp2_TH	0	pyramidal	2	185	779.506	Point 8	438.277	76.0039	739.646	no cnx
2018_11_30_exp2_TH	0	pyramidal	2	185	779.506	Point 32	326.901	-354.106	758.806	no cnx
2018_11_30_exp2_TH	0	pyramidal	2	185	779.506	Point 28	583.227	-266.249	849.606	no cnx
2018_11_30_exp2_TH	0	pyramidal	2	185	779.506	Point 29	652.564	-184.786	849.606	no cnx
2018_11_30_exp2_TH	0	pyramidal	2	185	779.506	Point 20	405.957	-328.275	790.896	no cnx
2018_11_30_exp2_TH	0	pyramidal	2	185	779.506	Point 21	706.087	-278.445	839.526	no cnx
2018_11_30_exp2_TH	0	pyramidal	2	185	779.506	Point 22	612.499	-314.425	839.526	no cnx
2018_11_30_exp2_TH	0	pyramidal	2	185	779.506	Point 23	684.043	-208.226	813.766	no cnx
2018_11_30_exp2_TH	0	pyramidal	2	185	779.506	Point 24	602.637	-88.5208	813.766	no cnx
2018_11_30_exp2_TH	0	pyramidal	2	185	779.506	Point 25	513.4	-214.253	849.606	no cnx
2018_11_30_exp2_TH	0	pyramidal	2	185	779.506	Point 26	624.154	-165.296	849.606	no cnx
2018_11_30_exp2_TH	0	pyramidal	2	185	779.506	Point 27	490.841	-149.329	849.606	no cnx
2018_11_30_exp2_TH	0	pyramidal	2	185	779.506	Point 33	248.947	-104.862	758.806	no cnx
2018_11_30_exp1_TH	1	pyramidal	2	100	648.7	Point 5	292.165	-55.1558	657.666	no cnx
2018_11_30_exp1_TH	1	pyramidal	2	100	648.7	Point 4	429.061	-71.7823	657.666	no cnx
2018_11_30_exp1_TH	1	pyramidal	2	100	648.7	Point 7	460.488	39.9813	648.836	excitatory
2018_11_30_exp1_TH	1	pyramidal	2	100	648.7	Point 6	441.361	-63.0688	648.846	no cnx
2018_11_30_exp1_TH	1	pyramidal	2	100	648.7	Point 1	264.7	-92.7001	667.206	no cnx
2018_11_30_exp1_TH	1	pyramidal	2	100	648.7	Point 3	428.905	91.6301	657.666	no cnx
2018_11_30_exp1_TH	1	pyramidal	2	100	648.7	Point 2	272.118	48.9796	657.666	no cnx
2018_11_30_exp1_TH	1	pyramidal	2	100	648.7	Point 21	534.951	-114.742	698.126	no cnx
2018_11_30_exp1_TH	1	pyramidal	2	100	648.7	Point 9	358.946	80.6164	636.256	no cnx
2018_11_30_exp1_TH	1	pyramidal	2	100	648.7	Point 8	402.74	58.1649	648.836	no cnx
2018_11_30_exp1_TH	1	pyramidal	2	100	648.7	Point 11	369.98	-6.32611	604.986	no cnx
2018_11_30_exp1_TH	1	pyramidal	2	100	648.7	Point 10	420.568	16.6293	615.996	no cnx
2018_11_30_exp1_TH	1	pyramidal	2	100	648.7	Point 13	365.08	150.619	592.806	no cnx
2018_11_30_exp1_TH	1	pyramidal	2	100	648.7	Point 12	475.798	30.2274	604.986	no cnx
2018_11_30_exp1_TH	1	pyramidal	2	100	648.7	Point 15	557.553	167.534	665.416	no cnx
2018_11_30_exp1_TH	1	pyramidal	2	100	648.7	Point 14	441.453	201.314	592.806	no cnx
2018_11_30_exp1_TH	1	pyramidal	2	100	648.7	Point 17	561.852	-11.4707	665.416	no cnx
2018_11_30_exp1_TH	1	pyramidal	2	100	648.7	Point 16	544.951	38.614	665.416	no cnx
2018_11_30_exp1_TH	1	pyramidal	2	100	648.7	Point 19	582.297	56.2659	698.126	no cnx
2018_11_30_exp1_TH	1	pyramidal	2	100	648.7	Point 18	487.687	-115.151	665.416	no cnx
2018_11_30_exp1_TH	1	pyramidal	2	100	648.7	Point 20	611.755	-99.1474	698.126	no cnx
2018_11_29_exp3_TH	1	pyramidal	2	262	539	Point 5	471.674	62.818	471.486	no cnx
2018_11_29_exp3_TH	1	pyramidal	2	262	539	Point 4	409.972	39.9512	484.836	no cnx
2018_11_29_exp3_TH	1	pyramidal	2	262	539	Point 7	550.08	94.8732	443.666	no cnx
2018_11_29_exp3_TH	1	pyramidal	2	262	539	Point 6	439.019	55.5522	452.326	excitatory
2018_11_29_exp3_TH	1	pyramidal	2	262	539	Point 1	410.38	88.239	525.486	no cnx
2018_11_29_exp3_TH	1	pyramidal	2	262	539	Point 3	426.823	-2.68705	484.836	no cnx
2018_11_29_exp3_TH	1	pyramidal	2	262	539	Point 2	523.899	140.819	495.806	no cnx
2018_11_29_exp2_TH	3	pyramidal	2	197	595.446	Point 5	344.16	130.063	640.526	no cnx
2018_11_29_exp2_TH	3	pyramidal	2	197	595.446	Point 4	468.054	63.0218	597.516	no cnx
2018_11_29_exp2_TH	3	pyramidal	2	197	595.446	Point 7	334.982	126.082	640.526	no cnx
2018_11_29_exp2_TH	3	pyramidal	2	197	595.446	Point 6	338.172	43.641	640.526	no cnx
2018_11_29_exp2_TH	3	pyramidal	2	197	595.446	Point 1	294.429	2.7218	590.886	no cnx
2018_11_29_exp2_TH	3	pyramidal	2	197	595.446	Point 3	452.925	86.8058	618.466	no cnx
2018_11_29_exp2_TH	3	pyramidal	2	197	595.446	Point 2	324.218	142.929	618.466	no cnx
2018_11_29_exp2_TH	3	pyramidal	2	197	595.446	Point 9	298.902	-21.0879	629.926	no cnx
2018_11_29_exp2_TH	3	pyramidal	2	197	595.446	Point 8	427.936	-70.5964	640.526	no cnx
2018_11_29_exp2_TH	3	pyramidal	2	197	595.446	Point 11	423.91	-48.8206	561.156	no cnx
2018_11_29_exp2_TH	3	pyramidal	2	197	595.446	Point 10	255.625	-99.8861	629.926	no cnx
2018_11_29_exp2_TH	3	pyramidal	2	197	595.446	Point 13	547.081	-87.6735	656.766	no cnx
2018_11_29_exp2_TH	3	pyramidal	2	197	595.446	Point 12	415.388	-62.2718	545.066	excitatory
2018_11_29_exp2_TH	3	pyramidal	2	197	595.446	Point 15	143.114	-28.8823	586.826	inhibitory
2018_11_29_exp2_TH	3	pyramidal	2	197	595.446	Point 14	506.721	67.6641	619.896	no cnx
2018_11_29_exp2_TH	2	pyramidal	2	158	600.176	Point 5	339.986	84.5583	640.526	no cnx
2018_11_29_exp2_TH	2	pyramidal	2	158	600.176	Point 4	463.88	17.5167	597.516	no cnx
2018_11_29_exp2_TH	2	pyramidal	2	158	600.176	Point 7	330.808	80.5773	640.526	no cnx
2018_11_29_exp2_TH	2	pyramidal	2	158	600.176	Point 6	333.997	-1.86409	640.526	no cnx
2018_11_29_exp2_TH	2	pyramidal	2	158	600.176	Point 1	290.255	-42.7833	590.886	no cnx
2018_11_29_exp2_TH	2	pyramidal	2	158	600.176	Point 3	448.751	41.3006	618.466	no cnx
2018_11_29_exp2_TH	2	pyramidal	2	158	600.176	Point 2	320.043	97.4239	618.466	no cnx
2018_11_29_exp2_TH	2	pyramidal	2	158	600.176	Point 9	294.728	-66.593	629.926	no cnx
2018_11_29_exp2_TH	2	pyramidal	2	158	600.176	Point 8	423.761	-116.102	640.526	no cnx
2018_11_29_exp2_TH	2	pyramidal	2	158	600.176	Point 11	419.735	-94.3258	561.156	no cnx
2018_11_29_exp2_TH	2	pyramidal	2	158	600.176	Point 10	251.451	-145.391	629.926	no cnx
2018_11_29_exp2_TH	2	pyramidal	2	158	600.176	Point 13	542.907	-133.179	656.766	no cnx
2018_11_29_exp2_TH	2	pyramidal	2	158	600.176	Point 12	411.214	-107.777	545.066	no cnx
2018_11_29_exp2_TH	2	pyramidal	2	158	600.176	Point 15	138.94	-74.3874	586.826	no cnx
2018_11_29_exp2_TH	2	pyramidal	2	158	600.176	Point 14	502.546	22.159	619.896	no cnx
2018_11_29_exp2_TH	1	pyramidal	2	154	594.176	Point 5	319.154	1.23538	640.526	no cnx
2018_11_29_exp2_TH	1	pyramidal	2	154	594.176	Point 4	443.048	-65.8063	597.516	no cnx
2018_11_29_exp2_TH	1	pyramidal	2	154	594.176	Point 7	309.976	-2.7456	640.526	no cnx
2018_11_29_exp2_TH	1	pyramidal	2	154	594.176	Point 6	313.166	-85.187	640.526	no cnx
2018_11_29_exp2_TH	1	pyramidal	2	154	594.176	Point 1	269.423	-126.106	590.886	no cnx
2018_11_29_exp2_TH	1	pyramidal	2	154	594.176	Point 3	427.919	-42.0223	618.466	no cnx
2018_11_29_exp2_TH	1	pyramidal	2	154	594.176	Point 2	299.212	14.101	618.466	no cnx
2018_11_29_exp2_TH	1	pyramidal	2	154	594.176	Point 9	273.896	-149.916	629.926	no cnx
2018_11_29_exp2_TH	1	pyramidal	2	154	594.176	Point 8	402.93	-199.424	640.526	no cnx
2018_11_29_exp2_TH	1	pyramidal	2	154	594.176	Point 11	398.903	-177.649	561.156	no cnx
2018_11_29_exp2_TH	1	pyramidal	2	154	594.176	Point 10	230.619	-228.714	629.926	no cnx
2018_11_29_exp2_TH	1	pyramidal	2	154	594.176	Point 13	522.075	-216.502	656.766	no cnx
2018_11_29_exp2_TH	1	pyramidal	2	154	594.176	Point 12	390.382	-191.1	545.066	no cnx
2018_11_29_exp2_TH	1	pyramidal	2	154	594.176	Point 15	118.108	-157.71	586.826	no cnx
2018_11_29_exp2_TH	1	pyramidal	2	154	594.176	Point 14	481.715	-61.1639	619.896	no cnx
2018_11_29_exp1_TH	3	pyramidal	2	285	558.24	Point 5	468.864	73.9856	585.396	no cnx
2018_11_29_exp1_TH	3	pyramidal	2	285	558.24	Point 4	281.051	69.8241	630.376	no cnx
2018_11_29_exp1_TH	3	pyramidal	2	285	558.24	Point 7	412.584	-63.6841	540.046	no cnx
2018_11_29_exp1_TH	3	pyramidal	2	285	558.24	Point 6	476.636	26.6156	569.236	no cnx
2018_11_29_exp1_TH	3	pyramidal	2	285	558.24	Point 1	352.701	-56.4345	580.746	no cnx
2018_11_29_exp1_TH	3	pyramidal	2	285	558.24	Point 3	170.718	62.3381	569.496	no cnx
2018_11_29_exp1_TH	3	pyramidal	2	285	558.24	Point 2	148.013	-51.4982	580.746	no cnx
2018_11_29_exp1_TH	3	pyramidal	2	285	558.24	Point 9	424.785	236.647	596.956	no cnx
2018_11_29_exp1_TH	3	pyramidal	2	285	558.24	Point 8	324.714	273.269	596.956	no cnx
2018_11_29_exp1_TH	3	pyramidal	2	285	558.24	Point 11	336.841	229.984	640.166	no cnx
2018_11_29_exp1_TH	3	pyramidal	2	285	558.24	Point 10	286.524	234.129	609.966	no cnx
2018_11_29_exp1_TH	3	pyramidal	2	285	558.24	Point 13	351.982	470.205	640.146	no cnx
2018_11_29_exp1_TH	3	pyramidal	2	285	558.24	Point 12	307.121	176.769	640.166	no cnx
2018_09_26_exp4_TH	1	pyramidal	2	253	-499.596	TSeries_307_2	514.469	10.0181	-419.356	no cnx
2018_09_26_exp4_TH	1	pyramidal	2	253	-499.596	TSeries_307_1	555.664	68.8859	-419.356	excitatory
2018_09_26_exp4_TH	1	pyramidal	2	253	-499.596	TSeries_447_4	359.583	-49.6275	-458.496	no cnx
2018_09_26_exp4_TH	1	pyramidal	2	253	-499.596	TSeries_447_1	440.159	-29.3768	-458.496	excitatory
2018_09_26_exp4_TH	1	pyramidal	2	253	-499.596	TSeries_447_3	463.442	-47.8987	-458.496	excitatory
2018_09_26_exp4_TH	1	pyramidal	2	253	-499.596	TSeries_447_2	465.919	-203.964	-458.496	no cnx
2018_09_26_exp4_TH	1	pyramidal	2	253	-499.596	TSeries_407_1	624.553	-87.081	-448.346	no cnx
2018_09_26_exp4_TH	1	pyramidal	2	253	-499.596	TSeries_407_2	559.078	-203.385	-448.346	no cnx
2018_09_26_exp4_TH	1	pyramidal	2	253	-499.596	TSeries_27_2	431.217	-2.04286	-489.166	excitatory
2018_09_26_exp4_TH	1	pyramidal	2	253	-499.596	TSeries_27_3	502.019	-42.0138	-489.166	no cnx
2018_09_26_exp4_TH	1	pyramidal	2	253	-499.596	TSeries_27_1	312.143	23.136	-489.166	no cnx
2018_09_26_exp4_TH	1	pyramidal	2	253	-499.596	TSeries_87_1	330.849	69.8269	-476.446	no cnx
2018_09_26_exp4_TH	1	pyramidal	2	253	-499.596	TSeries_87_2	440.508	20.5055	-476.446	no cnx
2018_09_26_exp4_TH	1	pyramidal	2	253	-499.596	TSeries_87_3	450.808	59.2926	-476.446	no cnx
2018_09_26_exp4_TH	1	pyramidal	2	253	-499.596	TSeries_627_4	319.317	68.6659	-479.456	no cnx
2018_09_26_exp4_TH	1	pyramidal	2	253	-499.596	TSeries_627_1	438.326	58.2014	-479.456	no cnx
2018_09_26_exp4_TH	1	pyramidal	2	253	-499.596	TSeries_627_3	426.914	19.8781	-479.456	excitatory
2018_09_26_exp4_TH	1	pyramidal	2	253	-499.596	TSeries_627_2	425.299	192.883	-479.456	no cnx
2018_09_26_exp4_TH	1	pyramidal	2	253	-499.596	TSeries_387_1	825.026	-55.2788	-460.606	no cnx
2018_09_26_exp4_TH	1	pyramidal	2	253	-499.596	TSeries_147_1	464.523	-35.2752	-466.206	excitatory
2018_09_26_exp4_TH	1	pyramidal	2	253	-499.596	TSeries_147_2	407.567	117.726	-466.206	no cnx
2018_09_26_exp4_TH	1	pyramidal	2	253	-499.596	TSeries_147_3	473.745	-39.7735	-466.206	excitatory
2018_09_26_exp4_TH	1	pyramidal	2	253	-499.596	TSeries_147_4	484.508	72.9098	-466.206	no cnx
2018_09_26_exp4_TH	1	pyramidal	2	253	-499.596	TSeries_267_1	556.114	45.2485	-441.136	no cnx
2018_09_26_exp4_TH	1	pyramidal	2	253	-499.596	TSeries_267_2	564.64	39.0821	-441.136	no cnx
2018_09_26_exp3_TH	2	pyramidal	2	198	-451.716	TSeries_252_1	768.128	-162.587	-394.716	no cnx
2018_09_26_exp3_TH	2	pyramidal	2	198	-451.716	TSeries_272_2	840.89	-140.994	-356.246	no cnx
2018_09_26_exp3_TH	2	pyramidal	2	198	-451.716	TSeries_272_1	795.081	-191.022	-356.246	no cnx
2018_09_26_exp3_TH	2	pyramidal	2	198	-451.716	TSeries_172_1	772.764	148.368	-424.496	no cnx
2018_09_26_exp3_TH	2	pyramidal	2	198	-451.716	TSeries_112_2	725.462	-2.42415	-444.576	no cnx
2018_09_26_exp3_TH	2	pyramidal	2	198	-451.716	TSeries_112_3	651.924	62.8875	-444.576	no cnx
2018_09_26_exp3_TH	2	pyramidal	2	198	-451.716	TSeries_112_1	694.575	50.7043	-444.576	no cnx
2018_09_26_exp3_TH	2	pyramidal	2	198	-451.716	TSeries_32_1	418.153	-2.38061	-455.616	no cnx
2018_09_26_exp3_TH	2	pyramidal	2	198	-451.716	TSeries_32_2	519.797	147.135	-455.616	no cnx
2018_09_26_exp3_TH	2	pyramidal	2	198	-451.716	TSeries_32_3	447.895	17.3358	-455.616	no cnx
2018_09_26_exp3_TH	2	pyramidal	2	198	-451.716	TSeries_32_4	410.652	-44.1607	-455.616	no cnx
2018_09_26_exp3_TH	2	pyramidal	2	198	-451.716	TSeries_192_2	821.867	-177.708	-437.146	no cnx
2018_09_26_exp3_TH	2	pyramidal	2	198	-451.716	TSeries_192_3	910.466	-174.37	-437.146	no cnx
2018_09_26_exp3_TH	2	pyramidal	2	198	-451.716	TSeries_192_1	858.131	-190.769	-437.146	no cnx
2018_09_26_exp2_TH	2	pyramidal	2	212	-449.406	TSeries_250_2	582.703	82.4705	-474.506	no cnx
2018_09_26_exp2_TH	2	pyramidal	2	212	-449.406	TSeries_250_1	536.75	15.3395	-474.506	no cnx
2018_09_26_exp2_TH	2	pyramidal	2	212	-449.406	TSeries_100_1	605.665	-40.415	-441.216	no cnx
2018_09_26_exp2_TH	2	pyramidal	2	212	-449.406	TSeries_30_2	340.941	-64.1819	-454.386	no cnx
2018_09_26_exp2_TH	2	pyramidal	2	212	-449.406	TSeries_30_3	468.464	171.45	-454.386	no cnx
2018_09_26_exp2_TH	2	pyramidal	2	212	-449.406	TSeries_30_1	483.375	-30.0311	-454.386	excitatory
2018_09_26_exp2_TH	2	pyramidal	2	212	-449.406	TSeries_140_1	599.449	-31.2812	-427.986	excitatory
2018_09_26_exp2_TH	2	pyramidal	2	212	-449.406	TSeries_160_4	713.748	-122.909	-456.516	no cnx
2018_09_26_exp2_TH	2	pyramidal	2	212	-449.406	TSeries_160_1	608.121	-31.6045	-456.516	no cnx
2018_09_26_exp2_TH	2	pyramidal	2	212	-449.406	TSeries_160_3	627.928	-5.90767	-456.516	no cnx
2018_09_26_exp2_TH	1	pyramidal	2	268	-474.406	TSeries_250_2	587.411	104.719	-474.506	no cnx
2018_09_26_exp2_TH	1	pyramidal	2	268	-474.406	TSeries_250_1	539.516	38.9599	-474.506	no cnx
2018_09_26_exp2_TH	1	pyramidal	2	268	-474.406	TSeries_100_1	606.772	-18.7847	-441.216	no cnx
2018_09_26_exp2_TH	1	pyramidal	2	268	-474.406	TSeries_331_1	346.034	-6.58263	-465.816	no cnx
2018_09_26_exp2_TH	1	pyramidal	2	268	-474.406	TSeries_331_2	340.218	-175.311	-465.816	no cnx
2018_09_26_exp2_TH	1	pyramidal	2	268	-474.406	TSeries_290_2	314.076	48.3436	-431.156	no cnx
2018_09_26_exp2_TH	1	pyramidal	2	268	-474.406	TSeries_290_1	312.515	-100.879	-431.156	no cnx
2018_09_26_exp2_TH	1	pyramidal	2	268	-474.406	TSeries_451_4	349.164	-15.4165	-421.706	no cnx
2018_09_26_exp2_TH	1	pyramidal	2	268	-474.406	TSeries_451_5	345.704	-176.675	-421.706	no cnx
2018_09_26_exp2_TH	1	pyramidal	2	268	-474.406	TSeries_451_1	340.403	30.9334	-421.706	no cnx
2018_09_26_exp2_TH	1	pyramidal	2	268	-474.406	TSeries_451_2	329.705	-107.197	-421.706	no cnx
2018_09_26_exp2_TH	1	pyramidal	2	268	-474.406	TSeries_451_3	307.659	-5.80583	-421.706	no cnx
2018_09_26_exp2_TH	1	pyramidal	2	268	-474.406	TSeries_551_1	392.662	-259.935	-473.156	no cnx
2018_09_26_exp2_TH	1	pyramidal	2	268	-474.406	TSeries_551_3	395.781	-299.136	-473.156	no cnx
2018_09_26_exp2_TH	1	pyramidal	2	268	-474.406	TSeries_551_2	339.92	-180.768	-473.156	no cnx
2018_09_26_exp2_TH	1	pyramidal	2	268	-474.406	TSeries_30_2	341.466	-34.8054	-454.386	no cnx
2018_09_26_exp2_TH	1	pyramidal	2	268	-474.406	TSeries_30_3	475.821	197	-454.386	no cnx
2018_09_26_exp2_TH	1	pyramidal	2	268	-474.406	TSeries_30_1	484.838	-4.83153	-454.386	no cnx
2018_09_26_exp2_TH	1	pyramidal	2	268	-474.406	TSeries_611_2	618.584	-299.598	-487.826	no cnx
2018_09_26_exp2_TH	1	pyramidal	2	268	-474.406	TSeries_611_3	499.383	-257.912	-487.826	no cnx
2018_09_26_exp2_TH	1	pyramidal	2	268	-474.406	TSeries_611_1	477.494	-201.106	-487.826	no cnx
2018_09_26_exp2_TH	1	pyramidal	2	268	-474.406	TSeries_611_4	442.344	-172.337	-487.826	no cnx
2018_09_26_exp2_TH	1	pyramidal	2	268	-474.406	TSeries_611_5	662.229	-230.288	-487.826	no cnx
2018_09_26_exp2_TH	1	pyramidal	2	268	-474.406	TSeries_140_1	600.826	-9.47315	-427.986	no cnx
2018_09_26_exp2_TH	1	pyramidal	2	268	-474.406	TSeries_371_4	510.337	157.425	-451.076	no cnx
2018_09_26_exp2_TH	1	pyramidal	2	268	-474.406	TSeries_371_1	369.027	-10.2801	-451.076	no cnx
2018_09_26_exp2_TH	1	pyramidal	2	268	-474.406	TSeries_371_3	401.565	15.7852	-451.076	no cnx
2018_09_26_exp2_TH	1	pyramidal	2	268	-474.406	TSeries_371_2	605.081	-19.9483	-451.076	no cnx
2018_09_26_exp2_TH	1	pyramidal	2	268	-474.406	TSeries_160_4	712.398	-104.402	-456.516	no cnx
2018_09_26_exp2_TH	1	pyramidal	2	268	-474.406	TSeries_160_1	609.485	-10.0497	-456.516	no cnx
2018_09_26_exp2_TH	1	pyramidal	2	268	-474.406	TSeries_160_3	630.034	15.0573	-456.516	no cnx
2018_09_26_exp1_TH	2	pyramidal	2	187	-478.106	TSeries_27_2	384.484	27.4242	-479.136	no cnx
2018_09_26_exp1_TH	2	pyramidal	2	187	-478.106	TSeries_27_3	450.487	68.7431	-479.136	no cnx
2018_09_26_exp1_TH	2	pyramidal	2	187	-478.106	TSeries_27_1	417.477	-57.1627	-479.136	no cnx
2018_09_26_exp1_TH	2	pyramidal	2	187	-478.106	TSeries_27_4	398.457	130.042	-479.136	no cnx
2018_09_26_exp1_TH	2	pyramidal	2	187	-478.106	TSeries_107_4	398.962	-12.802	-465.856	no cnx
2018_09_26_exp1_TH	2	pyramidal	2	187	-478.106	TSeries_107_1	345.24	-141.821	-465.856	no cnx
2018_09_26_exp1_TH	2	pyramidal	2	187	-478.106	TSeries_107_2	463.603	-73.7651	-465.856	no cnx
2018_09_26_exp1_TH	2	pyramidal	2	187	-478.106	TSeries_107_3	363.134	-111.8	-465.856	no cnx
2018_09_26_exp1_TH	2	pyramidal	2	187	-478.106	TSeries_227_1	781.095	130.451	-426.296	no cnx
2018_09_26_exp1_TH	2	pyramidal	2	187	-478.106	TSeries_227_3	758.505	183.785	-426.296	no cnx
2018_09_26_exp1_TH	2	pyramidal	2	187	-478.106	TSeries_227_2	708.01	13.0757	-426.296	no cnx
2018_09_26_exp1_TH	2	pyramidal	2	187	-478.106	TSeries_187_1	703.835	194.57	-440.756	no cnx
2018_09_26_exp1_TH	2	pyramidal	2	187	-478.106	TSeries_187_2	612.423	60.2006	-440.756	no cnx
2018_09_19_exp2_LH	1	pyramidal	2	150	6209.72	TSeries_328_1	860.151	361.452	6313.15	no cnx
2018_09_19_exp2_LH	1	pyramidal	2	150	6209.72	TSeries_188_4	797.562	387.526	6249.46	no cnx
2018_09_19_exp2_LH	1	pyramidal	2	150	6209.72	TSeries_188_3	893.511	315.21	6249.46	no cnx
2018_09_19_exp2_LH	1	pyramidal	2	150	6209.72	TSeries_188_2	890.85	261.4	6249.46	no cnx
2018_09_19_exp2_LH	1	pyramidal	2	150	6209.72	TSeries_188_1	744.66	185.527	6249.46	no cnx
2018_09_19_exp2_LH	1	pyramidal	2	150	6209.72	TSeries_308_1	841.191	181.644	6304.65	no cnx
2018_09_19_exp2_LH	1	pyramidal	2	150	6209.72	TSeries_47_1	150.68	-69.6099	6236.51	no cnx
2018_09_19_exp2_LH	1	pyramidal	2	150	6209.72	TSeries_47_2	353.604	23.8762	6236.51	no cnx
2018_09_19_exp2_LH	1	pyramidal	2	150	6209.72	TSeries_47_3	383.473	79.5075	6236.51	no cnx
2018_09_19_exp2_LH	1	pyramidal	2	150	6209.72	TSeries_268_1	867.11	342.186	6267.98	no cnx
2018_09_19_exp2_LH	1	pyramidal	2	150	6209.72	TSeries_148_1	425.057	-72.71	6244.63	no cnx
2018_09_19_exp2_LH	1	pyramidal	2	150	6209.72	TSeries_288_1	871.733	386.135	6292.85	no cnx
2018_09_19_exp2_LH	1	pyramidal	2	150	6209.72	TSeries_168_1	313.777	-180.493	6198.06	no cnx
2018_09_19_exp2_LH	1	pyramidal	2	150	6209.72	TSeries_27_1	364.409	33.865	6193.51	no cnx
2018_09_19_exp2_LH	1	pyramidal	2	150	6209.72	TSeries_107_1	389.736	-77.783	6205.83	no cnx
2018_09_19_exp2_LH	1	pyramidal	2	150	6209.72	TSeries_348_1	718.325	316.943	6334.44	no cnx
2018_09_19_exp2_LH	1	pyramidal	2	150	6209.72	TSeries_128_1	412.199	30.2636	6244.63	no cnx
2018_09_19_exp1_LH	1	pyramidal	2	275	8853.1	TSeries_207_1	400.395	14.5509	8875.52	excitatory
2018_09_19_exp1_LH	1	pyramidal	2	275	8853.1	TSeries_308_1	406.601	-68.0343	8852.89	no cnx
2018_09_19_exp1_LH	1	pyramidal	2	275	8853.1	TSeries_408_2	587.2	-160.613	8914.73	no cnx
2018_09_19_exp1_LH	1	pyramidal	2	275	8853.1	TSeries_408_1	542.048	-231.989	8914.73	no cnx
2018_09_19_exp1_LH	1	pyramidal	2	275	8853.1	TSeries_328_1	424.164	-52.5069	8874.82	excitatory
2018_09_19_exp1_LH	1	pyramidal	2	275	8853.1	TSeries_107_1	393.005	-25.7906	8916.21	no cnx
2018_09_19_exp1_LH	1	pyramidal	2	275	8853.1	TSeries_107_2	412.403	68.4282	8916.21	no cnx
2018_09_19_exp1_LH	1	pyramidal	2	275	8853.1	TSeries_287_1	419.232	67.0217	8859.32	no cnx
2018_09_19_exp1_LH	1	pyramidal	2	275	8853.1	TSeries_187_1	445.55	56.089	8953.83	no cnx
2018_09_19_exp1_LH	1	pyramidal	2	275	8853.1	TSeries_247_2	412.316	-10.2712	8860.48	no cnx
2018_09_19_exp1_LH	1	pyramidal	2	275	8853.1	TSeries_247_1	344.045	-105.29	8860.48	no cnx
2018_09_19_exp1_LH	1	pyramidal	2	275	8853.1	TSeries_147_1	409.453	66.6681	8926.07	no cnx
2018_09_19_exp1_LH	1	pyramidal	2	275	8853.1	TSeries_67_2	367.971	95.4475	8896.57	no cnx
2018_09_19_exp1_LH	1	pyramidal	2	275	8853.1	TSeries_368_1	553.776	-88.934	8889.39	no cnx
2018_09_19_exp1_LH	1	pyramidal	2	275	8853.1	TSeries_388_1	555.3	-172.944	8900.84	no cnx
2018_09_19_exp1_LH	1	pyramidal	2	275	8853.1	TSeries_167_1	354.644	-7.08656	8939.73	no cnx
2018_09_19_exp1_LH	1	pyramidal	2	275	8853.1	TSeries_348_1	482.803	-249.439	8881.31	no cnx
2018_09_11_exp2_CAB	2	pyramidal	2	200	-66.04	TSeries_747_2	662.22	18.0057	-43.35	no cnx
2018_09_11_exp2_CAB	2	pyramidal	2	200	-66.04	TSeries_747_1	648.629	88.3692	-43.35	no cnx
2018_09_11_exp2_CAB	2	pyramidal	2	200	-66.04	TSeries_387_2	431.431	28.7415	-17.87	no cnx
2018_09_11_exp2_CAB	2	pyramidal	2	200	-66.04	TSeries_387_1	348.777	-16.7471	-17.87	no cnx
2018_09_11_exp2_CAB	2	pyramidal	2	200	-66.04	TSeries_1007_9	748.699	106.996	-67.69	no cnx
2018_09_11_exp2_CAB	2	pyramidal	2	200	-66.04	TSeries_1007_8	799.137	38.117	-67.69	no cnx
2018_09_11_exp2_CAB	2	pyramidal	2	200	-66.04	TSeries_1007_1	817.655	-41.2084	-67.69	no cnx
2018_09_11_exp2_CAB	2	pyramidal	2	200	-66.04	TSeries_1007_3	801.476	-108.361	-67.69	no cnx
2018_09_11_exp2_CAB	2	pyramidal	2	200	-66.04	TSeries_1007_2	779.149	-78.688	-67.69	no cnx
2018_09_11_exp2_CAB	2	pyramidal	2	200	-66.04	TSeries_1007_5	812.635	102.352	-67.69	no cnx
2018_09_11_exp2_CAB	2	pyramidal	2	200	-66.04	TSeries_1007_4	730.614	-58.31	-67.69	no cnx
2018_09_11_exp2_CAB	2	pyramidal	2	200	-66.04	TSeries_1007_7	806.168	72.5202	-67.69	no cnx
2018_09_11_exp2_CAB	2	pyramidal	2	200	-66.04	TSeries_1007_6	847.169	47.5031	-67.69	no cnx
2018_09_11_exp2_CAB	2	pyramidal	2	200	-66.04	TSeries_927_1	601.874	-8.42421	-81.02	no cnx
2018_09_11_exp2_CAB	2	pyramidal	2	200	-66.04	TSeries_507_1	374.21	87.7833	-10.16	excitatory
2018_09_11_exp2_CAB	2	pyramidal	2	200	-66.04	TSeries_507_2	356.913	79.2442	-10.16	no cnx
2018_09_11_exp2_CAB	2	pyramidal	2	200	-66.04	TSeries_507_3	362.817	29.3215	-10.16	no cnx
2018_09_11_exp2_CAB	2	pyramidal	2	200	-66.04	TSeries_507_4	374.834	-95.1468	-10.16	no cnx
2018_09_11_exp2_CAB	2	pyramidal	2	200	-66.04	TSeries_867_3	632.875	-69.3345	-73.74	no cnx
2018_09_11_exp2_CAB	2	pyramidal	2	200	-66.04	TSeries_867_2	603.471	-6.76498	-73.74	no cnx
2018_09_11_exp2_CAB	2	pyramidal	2	200	-66.04	TSeries_867_1	607.753	69.282	-73.74	no cnx
2018_09_11_exp2_CAB	2	pyramidal	2	200	-66.04	TSeries_1307_2	285.124	74.1839	-92.57	no cnx
2018_09_11_exp2_CAB	2	pyramidal	2	200	-66.04	TSeries_1307_3	290.921	19.6334	-92.57	no cnx
2018_09_11_exp2_CAB	2	pyramidal	2	200	-66.04	TSeries_1307_1	271.194	141.805	-92.57	no cnx
2018_09_11_exp2_CAB	2	pyramidal	2	200	-66.04	TSeries_667_1	630.537	1.96047	-2.78	no cnx
2018_09_11_exp2_CAB	2	pyramidal	2	200	-66.04	TSeries_667_2	636.498	-47.5052	-2.78	no cnx
2018_09_11_exp2_CAB	2	pyramidal	2	200	-66.04	TSeries_27_2	380.482	87.9372	-17.87	no cnx
2018_09_11_exp2_CAB	2	pyramidal	2	200	-66.04	TSeries_27_3	411.788	52.0505	-17.87	no cnx
2018_09_11_exp2_CAB	2	pyramidal	2	200	-66.04	TSeries_27_1	416.11	102.103	-17.87	no cnx
2018_09_11_exp2_CAB	2	pyramidal	2	200	-66.04	TSeries_27_6	286.671	15.9802	-17.87	no cnx
2018_09_11_exp2_CAB	2	pyramidal	2	200	-66.04	TSeries_27_4	383.429	29.0976	-17.87	no cnx
2018_09_11_exp2_CAB	2	pyramidal	2	200	-66.04	TSeries_27_5	429.425	-11.8511	-17.87	no cnx
2018_09_11_exp2_CAB	2	pyramidal	2	200	-66.04	TSeries_1187_1	457.705	-10.7	-92.57	no cnx
2018_09_11_exp2_CAB	2	pyramidal	2	200	-66.04	TSeries_1187_2	463.952	13.59	-92.57	no cnx
2018_09_11_exp2_CAB	2	pyramidal	2	200	-66.04	TSeries_1187_3	466.384	29.5331	-92.57	no cnx
2018_09_11_exp2_CAB	2	pyramidal	2	200	-66.04	TSeries_1187_4	576.931	-7.31724	-92.57	no cnx
2018_09_11_exp2_CAB	2	pyramidal	2	200	-66.04	TSeries_1187_5	586.298	68.5661	-92.57	no cnx
2018_09_11_exp2_CAB	2	pyramidal	2	200	-66.04	TSeries_1187_6	583.102	140.431	-92.57	no cnx
2018_09_11_exp2_CAB	2	pyramidal	2	200	-66.04	TSeries_947_1	733.096	111.242	-90.6	no cnx
2018_09_11_exp2_CAB	2	pyramidal	2	200	-66.04	TSeries_947_2	797.039	27.7018	-90.6	no cnx
2018_09_11_exp2_CAB	2	pyramidal	2	200	-66.04	TSeries_947_3	892.237	-95.8958	-90.6	no cnx
2018_09_11_exp2_CAB	2	pyramidal	2	200	-66.04	TSeries_827_2	735.057	-53.6378	-60.59	no cnx
2018_09_11_exp2_CAB	2	pyramidal	2	200	-66.04	TSeries_827_1	777.474	-70.9401	-60.59	no cnx
2018_09_11_exp2_CAB	2	pyramidal	2	200	-66.04	TSeries_707_2	585.919	1.43477	-32.52	no cnx
2018_09_11_exp2_CAB	2	pyramidal	2	200	-66.04	TSeries_707_1	696.742	-29.4164	-32.52	no cnx
2018_09_11_exp2_CAB	1	pyramidal	2	168	-74.04	TSeries_747_2	659.725	-44.7003	-43.35	no cnx
2018_09_11_exp2_CAB	1	pyramidal	2	168	-74.04	TSeries_747_1	652.794	26.6279	-43.35	no cnx
2018_09_11_exp2_CAB	1	pyramidal	2	168	-74.04	TSeries_387_2	430.961	-12.3643	-17.87	no cnx
2018_09_11_exp2_CAB	1	pyramidal	2	168	-74.04	TSeries_387_1	344.404	-49.8995	-17.87	excitatory
2018_09_11_exp2_CAB	1	pyramidal	2	168	-74.04	TSeries_1007_9	754.17	35.7858	-67.69	no cnx
2018_09_11_exp2_CAB	1	pyramidal	2	168	-74.04	TSeries_1007_8	797.924	-37.5201	-67.69	no cnx
2018_09_11_exp2_CAB	1	pyramidal	2	168	-74.04	TSeries_1007_1	808.92	-118.233	-67.69	no cnx
2018_09_11_exp2_CAB	1	pyramidal	2	168	-74.04	TSeries_1007_3	786.514	-183.572	-67.69	no cnx
2018_09_11_exp2_CAB	1	pyramidal	2	168	-74.04	TSeries_1007_2	767.069	-151.935	-67.69	no cnx
2018_09_11_exp2_CAB	1	pyramidal	2	168	-74.04	TSeries_1007_5	817.388	25.1658	-67.69	no cnx
2018_09_11_exp2_CAB	1	pyramidal	2	168	-74.04	TSeries_1007_4	720.66	-127.095	-67.69	no cnx
2018_09_11_exp2_CAB	1	pyramidal	2	168	-74.04	TSeries_1007_7	808.152	-3.92807	-67.69	no cnx
2018_09_11_exp2_CAB	1	pyramidal	2	168	-74.04	TSeries_1007_6	846.625	-32.6807	-67.69	no cnx
2018_09_11_exp2_CAB	1	pyramidal	2	168	-74.04	TSeries_927_1	597.166	-65.3533	-81.02	no cnx
2018_09_11_exp2_CAB	1	pyramidal	2	168	-74.04	TSeries_507_1	379.53	51.7844	-10.16	no cnx
2018_09_11_exp2_CAB	1	pyramidal	2	168	-74.04	TSeries_507_2	361.508	44.9055	-10.16	no cnx
2018_09_11_exp2_CAB	1	pyramidal	2	168	-74.04	TSeries_507_3	362.703	-5.35098	-10.16	no cnx
2018_09_11_exp2_CAB	1	pyramidal	2	168	-74.04	TSeries_507_4	362.993	-130.398	-10.16	excitatory
2018_09_11_exp2_CAB	1	pyramidal	2	168	-74.04	TSeries_867_3	622.317	-128.903	-73.74	no cnx
2018_09_11_exp2_CAB	1	pyramidal	2	168	-74.04	TSeries_867_2	598.912	-63.8512	-73.74	no cnx
2018_09_11_exp2_CAB	1	pyramidal	2	168	-74.04	TSeries_867_1	610.308	11.4588	-73.74	no cnx
2018_09_11_exp2_CAB	1	pyramidal	2	168	-74.04	TSeries_1307_2	289.561	46.6011	-92.57	no cnx
2018_09_11_exp2_CAB	1	pyramidal	2	168	-74.04	TSeries_1307_3	290.216	-8.25262	-92.57	excitatory
2018_09_11_exp2_CAB	1	pyramidal	2	168	-74.04	TSeries_1307_1	282.035	115.23	-92.57	no cnx
2018_09_11_exp2_CAB	1	pyramidal	2	168	-74.04	TSeries_667_1	626.677	-57.703	-2.78	no cnx
2018_09_11_exp2_CAB	1	pyramidal	2	168	-74.04	TSeries_667_2	627.972	-107.51	-2.78	no cnx
2018_09_11_exp2_CAB	1	pyramidal	2	168	-74.04	TSeries_27_2	385.789	51.3494	-17.87	no cnx
2018_09_11_exp2_CAB	1	pyramidal	2	168	-74.04	TSeries_27_3	413.59	12.6845	-17.87	no cnx
2018_09_11_exp2_CAB	1	pyramidal	2	168	-74.04	TSeries_27_1	422.588	62.1111	-17.87	no cnx
2018_09_11_exp2_CAB	1	pyramidal	2	168	-74.04	TSeries_27_6	285.642	-11.4911	-17.87	no cnx
2018_09_11_exp2_CAB	1	pyramidal	2	168	-74.04	TSeries_27_4	383.204	-7.50726	-17.87	excitatory
2018_09_11_exp2_CAB	1	pyramidal	2	168	-74.04	TSeries_27_5	425.156	-52.5898	-17.87	excitatory
2018_09_11_exp2_CAB	1	pyramidal	2	168	-74.04	TSeries_1187_1	453.42	-54.0963	-92.57	no cnx
2018_09_11_exp2_CAB	1	pyramidal	2	168	-74.04	TSeries_1187_2	461.917	-30.4994	-92.57	no cnx
2018_09_11_exp2_CAB	1	pyramidal	2	168	-74.04	TSeries_1187_3	465.834	-14.8547	-92.57	no cnx
2018_09_11_exp2_CAB	1	pyramidal	2	168	-74.04	TSeries_1187_4	572.437	-61.9116	-92.57	no cnx
2018_09_11_exp2_CAB	1	pyramidal	2	168	-74.04	TSeries_1187_5	588.88	12.7586	-92.57	no cnx
2018_09_11_exp2_CAB	1	pyramidal	2	168	-74.04	TSeries_1187_6	592.439	84.6065	-92.57	no cnx
2018_09_11_exp2_CAB	1	pyramidal	2	168	-74.04	TSeries_947_1	739.034	41.4771	-90.6	no cnx
2018_09_11_exp2_CAB	1	pyramidal	2	168	-74.04	TSeries_947_2	794.859	-47.6926	-90.6	no cnx
2018_09_11_exp2_CAB	1	pyramidal	2	168	-74.04	TSeries_947_3	878.044	-179.675	-90.6	no cnx
2018_09_11_exp2_CAB	1	pyramidal	2	168	-74.04	TSeries_827_2	725.521	-122.86	-60.59	no cnx
2018_09_11_exp2_CAB	1	pyramidal	2	168	-74.04	TSeries_827_1	766.128	-144.065	-60.59	no cnx
2018_09_11_exp2_CAB	1	pyramidal	2	168	-74.04	TSeries_707_2	582.207	-54.0413	-32.52	no cnx
2018_09_11_exp2_CAB	1	pyramidal	2	168	-74.04	TSeries_707_1	689.647	-95.1514	-32.52	no cnx
2018_09_11_exp1_CAB	2	pyramidal	2	205	-72.92	TSeries_447_1	618.047	268.935	182.88	no cnx
2018_09_11_exp1_CAB	2	pyramidal	2	205	-72.92	TSeries_447_2	694.95	223.127	182.88	no cnx
2018_09_11_exp1_CAB	2	pyramidal	2	205	-72.92	TSeries_627_1	721.516	216.56	98.82	no cnx
2018_09_11_exp1_CAB	2	pyramidal	2	205	-72.92	TSeries_627_2	679.71	108.522	98.82	no cnx
2018_09_11_exp1_CAB	2	pyramidal	2	205	-72.92	TSeries_127_1	693.496	37.5852	50.89	no cnx
2018_09_11_exp1_CAB	2	pyramidal	2	205	-72.92	TSeries_107_1	657.699	3.68424	62.89	no cnx
2018_09_11_exp1_CAB	2	pyramidal	2	205	-72.92	TSeries_487_1	720.03	223.244	131.74	no cnx
2018_09_11_exp1_CAB	2	pyramidal	2	205	-72.92	TSeries_487_3	804.759	184.349	131.74	no cnx
2018_09_11_exp1_CAB	2	pyramidal	2	205	-72.92	TSeries_487_2	808.351	235.424	131.74	no cnx
2018_09_11_exp1_CAB	2	pyramidal	2	205	-72.92	TSeries_487_5	717.979	173.369	131.74	no cnx
2018_09_11_exp1_CAB	2	pyramidal	2	205	-72.92	TSeries_487_4	790.71	146.185	131.74	no cnx
2018_09_11_exp1_CAB	2	pyramidal	2	205	-72.92	TSeries_667_1	641.989	230.204	80.88	no cnx
2018_09_11_exp1_CAB	2	pyramidal	2	205	-72.92	TSeries_667_3	614.067	118.111	80.88	no cnx
2018_09_11_exp1_CAB	2	pyramidal	2	205	-72.92	TSeries_667_2	641.137	189.927	80.88	no cnx
2018_09_11_exp1_CAB	2	pyramidal	2	205	-72.92	TSeries_667_5	676.739	110.749	80.88	no cnx
2018_09_11_exp1_CAB	2	pyramidal	2	205	-72.92	TSeries_667_4	640.064	92.1203	80.88	no cnx
2018_09_11_exp1_CAB	2	pyramidal	2	205	-72.92	TSeries_147_1	558.611	46.5375	14.81	no cnx
2018_09_11_exp1_CAB	2	pyramidal	2	205	-72.92	TSeries_147_2	641.797	10.1562	14.81	no cnx
2018_09_11_exp1_CAB	2	pyramidal	2	205	-72.92	TSeries_147_3	609.702	-87.0264	14.81	no cnx
2018_09_11_exp1_CAB	2	pyramidal	2	205	-72.92	TSeries_147_4	584.91	-110.853	14.81	no cnx
2018_09_11_exp1_CAB	2	pyramidal	2	205	-72.92	TSeries_147_5	645.131	-156.435	14.81	no cnx
2018_09_11_exp1_CAB	2	pyramidal	2	205	-72.92	TSeries_27_2	677.58	3.05834	76.53	no cnx
2018_09_11_exp1_CAB	2	pyramidal	2	205	-72.92	TSeries_27_1	650.269	29.6775	76.53	no cnx
2018_09_11_exp1_CAB	2	pyramidal	2	205	-72.92	TSeries_587_1	687.806	243.978	119.2	no cnx
2018_09_11_exp1_CAB	2	pyramidal	2	205	-72.92	TSeries_587_2	809.051	125.791	119.2	no cnx
2018_09_10_exp2_TH	0	pyramidal	2	211	-410.806	TSeries_812_9	363.08	58.6813	-411.196	no cnx
2018_09_10_exp2_TH	0	pyramidal	2	211	-410.806	TSeries_812_8	529.975	191.433	-411.196	no cnx
2018_09_10_exp2_TH	0	pyramidal	2	211	-410.806	TSeries_812_3	491.282	208.721	-411.196	no cnx
2018_09_10_exp2_TH	0	pyramidal	2	211	-410.806	TSeries_812_2	442.136	-64.9818	-411.196	no cnx
2018_09_10_exp2_TH	0	pyramidal	2	211	-410.806	TSeries_812_1	562.654	193.437	-411.196	no cnx
2018_09_10_exp2_TH	0	pyramidal	2	211	-410.806	TSeries_812_7	504.948	-42.858	-411.196	excitatory
2018_09_10_exp2_TH	0	pyramidal	2	211	-410.806	TSeries_812_6	496.082	236.324	-411.196	excitatory
2018_09_10_exp2_TH	0	pyramidal	2	211	-410.806	TSeries_812_5	378.158	158.776	-411.196	no cnx
2018_09_10_exp2_TH	0	pyramidal	2	211	-410.806	TSeries_812_4	427.552	61.0018	-411.196	no cnx
2018_09_10_exp2_TH	0	pyramidal	2	211	-410.806	TSeries_392_4	465.136	-51.9733	-343.036	no cnx
2018_09_10_exp2_TH	0	pyramidal	2	211	-410.806	TSeries_392_1	408.427	28.9846	-343.036	no cnx
2018_09_10_exp2_TH	0	pyramidal	2	211	-410.806	TSeries_392_2	537.133	17.1828	-343.036	no cnx
2018_09_10_exp2_TH	0	pyramidal	2	211	-410.806	TSeries_392_3	405.663	79.4885	-343.036	no cnx
2018_09_10_exp2_TH	0	pyramidal	2	211	-410.806	TSeries_632_3	740.721	318.415	-350.086	no cnx
2018_09_10_exp2_TH	0	pyramidal	2	211	-410.806	TSeries_632_2	883.231	337.023	-350.086	no cnx
2018_09_10_exp2_TH	0	pyramidal	2	211	-410.806	TSeries_632_6	712.277	376.153	-350.086	no cnx
2018_09_10_exp2_TH	0	pyramidal	2	211	-410.806	TSeries_632_5	880.383	357.02	-350.086	no cnx
2018_09_10_exp2_TH	0	pyramidal	2	211	-410.806	TSeries_27_2	367.709	147.757	-397.456	no cnx
2018_09_10_exp2_TH	0	pyramidal	2	211	-410.806	TSeries_27_3	505.054	10.9397	-397.456	no cnx
2018_09_10_exp2_TH	0	pyramidal	2	211	-410.806	TSeries_27_1	438.567	84.3335	-397.456	no cnx
2018_09_10_exp2_TH	0	pyramidal	2	211	-410.806	TSeries_27_6	520.49	68.2467	-397.456	no cnx
2018_09_10_exp2_TH	0	pyramidal	2	211	-410.806	TSeries_27_7	414.649	229.844	-397.456	no cnx
2018_09_10_exp2_TH	0	pyramidal	2	211	-410.806	TSeries_27_4	423.423	68.1818	-397.456	no cnx
2018_09_10_exp2_TH	0	pyramidal	2	211	-410.806	TSeries_27_5	412.26	-5.99689	-397.456	no cnx
2018_09_10_exp2_TH	0	pyramidal	2	211	-410.806	TSeries_752_1	646.513	100.086	-336.736	no cnx
2018_09_10_exp2_TH	0	pyramidal	2	211	-410.806	TSeries_752_2	524.011	15.0426	-336.736	no cnx
2018_09_10_exp2_TH	0	pyramidal	2	211	-410.806	TSeries_752_3	680.464	119.279	-336.736	no cnx
2018_09_10_exp2_TH	0	pyramidal	2	211	-410.806	TSeries_252_1	495.02	-2.70431	-369.186	no cnx
2018_09_10_exp2_TH	0	pyramidal	2	211	-410.806	TSeries_252_2	480.021	128.23	-369.186	no cnx
2018_09_10_exp2_TH	0	pyramidal	2	211	-410.806	TSeries_552_4	881.387	210.329	-359.336	no cnx
2018_09_10_exp2_TH	0	pyramidal	2	211	-410.806	TSeries_552_2	881.099	261.04	-359.336	no cnx
2018_09_10_exp2_TH	0	pyramidal	2	211	-410.806	TSeries_552_3	743.861	316.044	-359.336	no cnx
2018_09_10_exp2_TH	0	pyramidal	2	211	-410.806	TSeries_552_1	743.847	293.462	-359.336	no cnx
2018_09_10_exp2_TH	0	pyramidal	2	211	-410.806	TSeries_992_6	359.845	58.9345	-419.636	no cnx
2018_09_10_exp2_TH	0	pyramidal	2	211	-410.806	TSeries_992_7	564.985	55.4405	-419.636	no cnx
2018_09_10_exp2_TH	0	pyramidal	2	211	-410.806	TSeries_992_4	456.379	-90.4653	-419.636	no cnx
2018_09_10_exp2_TH	0	pyramidal	2	211	-410.806	TSeries_992_5	369.24	182.234	-419.636	no cnx
2018_09_10_exp2_TH	0	pyramidal	2	211	-410.806	TSeries_992_2	425.568	-75.3764	-419.636	no cnx
2018_09_10_exp2_TH	0	pyramidal	2	211	-410.806	TSeries_992_3	340.471	74.9079	-419.636	no cnx
2018_09_10_exp2_TH	0	pyramidal	2	211	-410.806	TSeries_992_1	359.707	69.3339	-419.636	no cnx
2018_09_10_exp2_TH	0	pyramidal	2	211	-410.806	TSeries_472_1	751.624	220.429	-347.766	no cnx
2018_09_10_exp2_TH	0	pyramidal	2	211	-410.806	TSeries_472_3	862.585	146.507	-347.766	no cnx
2018_09_10_exp2_TH	0	pyramidal	2	211	-410.806	TSeries_472_2	699.341	336.07	-347.766	no cnx
2018_09_10_exp2_TH	0	pyramidal	2	211	-410.806	TSeries_1232_4	670.975	120.505	-337.036	no cnx
2018_09_10_exp2_TH	0	pyramidal	2	211	-410.806	TSeries_1232_3	631.832	271.852	-337.036	no cnx
2018_09_10_exp2_TH	0	pyramidal	2	211	-410.806	TSeries_1232_2	636.775	101.658	-337.036	no cnx
2018_09_10_exp2_TH	0	pyramidal	2	211	-410.806	TSeries_1232_1	653.64	280.204	-337.036	no cnx
2018_09_10_exp2_TH	0	pyramidal	2	211	-410.806	TSeries_1132_4	652.362	129.202	-364.036	no cnx
2018_09_10_exp2_TH	0	pyramidal	2	211	-410.806	TSeries_1132_5	764.943	98.967	-364.036	no cnx
2018_09_10_exp2_TH	0	pyramidal	2	211	-410.806	TSeries_1132_1	730.005	291.137	-364.036	no cnx
2018_09_10_exp2_TH	0	pyramidal	2	211	-410.806	TSeries_1132_2	655.525	51.1646	-364.036	no cnx
2018_09_10_exp2_TH	0	pyramidal	2	211	-410.806	TSeries_1132_3	737.495	155.322	-364.036	no cnx
2018_09_10_exp2_TH	0	pyramidal	2	211	-410.806	TSeries_227_1	567.113	27.675	-369.186	excitatory
2018_09_10_exp2_TH	0	pyramidal	2	211	-410.806	TSeries_167_2	491.241	62.9376	-380.426	no cnx
2018_09_10_exp2_TH	0	pyramidal	2	211	-410.806	TSeries_167_3	343.921	86.011	-380.426	no cnx
2018_09_10_exp2_TH	0	pyramidal	2	211	-410.806	TSeries_167_1	377.069	81.5289	-380.426	no cnx
2018_09_10_exp2_TH	0	pyramidal	2	211	-410.806	TSeries_312_4	470.915	-32.657	-362.106	no cnx
2018_09_10_exp2_TH	0	pyramidal	2	211	-410.806	TSeries_312_1	472.507	18.3584	-362.106	no cnx
2018_09_10_exp2_TH	0	pyramidal	2	211	-410.806	TSeries_312_2	400.462	121.347	-362.106	no cnx
2018_09_10_exp2_TH	0	pyramidal	2	211	-410.806	TSeries_312_3	519.762	29.2813	-362.106	no cnx
2018_09_10_exp2_CAB	2	pyramidal	2	203	25.31	TSeries_1527_2	667.563	-63.0686	-11.04	no cnx
2018_09_10_exp2_CAB	2	pyramidal	2	203	25.31	TSeries_1527_3	768.748	-180.033	-11.04	no cnx
2018_09_10_exp2_CAB	2	pyramidal	2	203	25.31	TSeries_1527_1	708.799	-28.5332	-11.04	no cnx
2018_09_10_exp2_CAB	2	pyramidal	2	203	25.31	TSeries_1687_1	761.927	-89.7385	-61.28	no cnx
2018_09_10_exp2_CAB	2	pyramidal	2	203	25.31	TSeries_27_1	277.897	56.3421	11.06	no cnx
2018_09_10_exp2_CAB	2	pyramidal	2	203	25.31	TSeries_1347_2	647.255	-174.181	29.65	no cnx
2018_09_10_exp2_CAB	2	pyramidal	2	203	25.31	TSeries_1347_1	677.024	-196.365	29.65	no cnx
2018_09_10_exp2_CAB	2	pyramidal	2	203	25.31	TSeries_1207_2	408.16	-188.913	40.86	no cnx
2018_09_10_exp2_CAB	2	pyramidal	2	203	25.31	TSeries_1207_1	535.487	-260.151	40.86	no cnx
2018_09_10_exp2_CAB	2	pyramidal	2	203	25.31	TSeries_1387_4	598.375	-136.366	17.38	no cnx
2018_09_10_exp2_CAB	2	pyramidal	2	203	25.31	TSeries_1387_2	672.316	-197.71	17.38	no cnx
2018_09_10_exp2_CAB	2	pyramidal	2	203	25.31	TSeries_1387_3	609.883	-188.641	17.38	no cnx
2018_09_10_exp2_CAB	2	pyramidal	2	203	25.31	TSeries_1387_1	744.595	-186.977	17.38	no cnx
2018_09_10_exp2_CAB	2	pyramidal	2	203	25.31	TSeries_787_2	610.14	-124.504	-16.61	no cnx
2018_09_10_exp2_CAB	2	pyramidal	2	203	25.31	TSeries_787_1	557.425	-36.5034	-16.61	no cnx
2018_09_10_exp2_CAB	2	pyramidal	2	203	25.31	TSeries_547_4	345.415	-54.5066	55.34	no cnx
2018_09_10_exp2_CAB	2	pyramidal	2	203	25.31	TSeries_547_1	447.018	-37.741	55.34	excitatory
2018_09_10_exp2_CAB	2	pyramidal	2	203	25.31	TSeries_547_2	384.579	60.955	55.34	no cnx
2018_09_10_exp2_CAB	2	pyramidal	2	203	25.31	TSeries_547_3	354.445	54.285	55.34	no cnx
2018_09_10_exp2_CAB	2	pyramidal	2	203	25.31	TSeries_207_2	382.886	35.7654	4.69	no cnx
2018_09_10_exp2_CAB	2	pyramidal	2	203	25.31	TSeries_207_1	363.139	52.2054	4.69	no cnx
2018_09_10_exp2_CAB	2	pyramidal	2	203	25.31	TSeries_47_4	330.362	-143.671	-4.91	no cnx
2018_09_10_exp2_CAB	2	pyramidal	2	203	25.31	TSeries_47_1	472.151	-55.7188	-4.91	no cnx
2018_09_10_exp2_CAB	2	pyramidal	2	203	25.31	TSeries_47_2	425.646	-120.87	-4.91	no cnx
2018_09_10_exp2_CAB	2	pyramidal	2	203	25.31	TSeries_47_3	333.363	-130.827	-4.91	no cnx
2018_09_10_exp2_CAB	2	pyramidal	2	203	25.31	TSeries_827_3	510.863	-242.175	0.5	no cnx
2018_09_10_exp2_CAB	2	pyramidal	2	203	25.31	TSeries_827_2	467.741	-177.031	0.5	no cnx
2018_09_10_exp2_CAB	2	pyramidal	2	203	25.31	TSeries_827_1	475.987	-132.542	0.5	no cnx
2018_09_10_exp2_CAB	2	pyramidal	2	203	25.31	TSeries_1247_3	435.544	-231.276	62.11	no cnx
2018_09_10_exp2_CAB	2	pyramidal	2	203	25.31	TSeries_1247_2	468.352	-188.693	62.11	no cnx
2018_09_10_exp2_CAB	2	pyramidal	2	203	25.31	TSeries_1247_1	510.173	-125.917	62.11	no cnx
2018_09_10_exp2_CAB	2	pyramidal	2	203	25.31	TSeries_1247_5	421.429	-191.011	62.11	no cnx
2018_09_10_exp2_CAB	2	pyramidal	2	203	25.31	TSeries_1247_4	411.367	-138.909	62.11	no cnx
2018_09_10_exp2_CAB	2	pyramidal	2	203	25.31	TSeries_1007_1	494.08	-130.888	22.5	no cnx
2018_09_10_exp2_CAB	2	pyramidal	2	203	25.31	TSeries_1007_3	471.803	-219.175	22.5	no cnx
2018_09_10_exp2_CAB	2	pyramidal	2	203	25.31	TSeries_1007_2	496.351	-175.753	22.5	no cnx
2018_09_10_exp2_CAB	2	pyramidal	2	203	25.31	TSeries_1007_5	607.133	-146.001	22.5	no cnx
2018_09_10_exp2_CAB	2	pyramidal	2	203	25.31	TSeries_1007_4	438.598	-39.0372	22.5	no cnx
2018_09_10_exp2_CAB	2	pyramidal	2	203	25.31	TSeries_1467_2	689.419	-242.438	32.19	no cnx
2018_09_10_exp2_CAB	2	pyramidal	2	203	25.31	TSeries_1467_1	766.142	-254.68	32.19	no cnx
2018_09_10_exp2_CAB	2	pyramidal	2	203	25.31	TSeries_487_1	347.522	-56.5184	65.17	no cnx
2018_09_10_exp2_CAB	2	pyramidal	2	203	25.31	TSeries_487_3	374.648	-169.627	65.17	no cnx
2018_09_10_exp2_CAB	2	pyramidal	2	203	25.31	TSeries_487_2	428.067	-136.253	65.17	no cnx
2018_09_10_exp2_CAB	2	pyramidal	2	203	25.31	TSeries_1587_4	617.687	-80.2898	-26.28	no cnx
2018_09_10_exp2_CAB	2	pyramidal	2	203	25.31	TSeries_1587_5	707.579	-216.882	-26.28	no cnx
2018_09_10_exp2_CAB	2	pyramidal	2	203	25.31	TSeries_1587_1	778.978	-105.417	-26.28	no cnx
2018_09_10_exp2_CAB	2	pyramidal	2	203	25.31	TSeries_1587_2	743.177	-116.544	-26.28	no cnx
2018_09_10_exp2_CAB	2	pyramidal	2	203	25.31	TSeries_1587_3	656.088	-65.8057	-26.28	no cnx
2018_09_10_exp2_CAB	2	pyramidal	2	203	25.31	TSeries_247_4	394.466	-189.156	24.67	no cnx
2018_09_10_exp2_CAB	2	pyramidal	2	203	25.31	TSeries_247_3	496.437	-9.6102	24.67	no cnx
2018_09_10_exp2_CAB	2	pyramidal	2	203	25.31	TSeries_247_2	482.577	10.6743	24.67	excitatory
2018_09_10_exp2_CAB	2	pyramidal	2	203	25.31	TSeries_247_1	440.791	26.8121	24.67	no cnx
2018_09_10_exp1_TH	1	pyramidal	2	237	-445.126	TSeries_67_2	491.478	52.817	-460.126	no cnx
2018_09_10_exp1_TH	1	pyramidal	2	237	-445.126	TSeries_67_3	411.656	-87.0035	-460.126	no cnx
2018_09_10_exp1_TH	1	pyramidal	2	237	-445.126	TSeries_67_1	434.908	56.1184	-460.126	no cnx
2018_09_10_exp1_TH	1	pyramidal	2	237	-445.126	TSeries_327_1	980.455	112.229	-451.636	no cnx
2018_09_10_exp1_TH	1	pyramidal	2	237	-445.126	TSeries_327_2	960.068	183.043	-451.636	no cnx
2018_09_10_exp1_TH	1	pyramidal	2	237	-445.126	TSeries_327_3	874.711	53.2699	-451.636	no cnx
2018_09_10_exp1_TH	1	pyramidal	2	237	-445.126	TSeries_267_1	918.118	-47.1996	-425.156	no cnx
2018_09_10_exp1_TH	1	pyramidal	2	237	-445.126	TSeries_387_1	216.701	218.238	-430.686	no cnx
2018_09_10_exp1_TH	1	pyramidal	2	237	-445.126	TSeries_508_3	747.377	346.665	-352.436	no cnx
2018_09_10_exp1_TH	1	pyramidal	2	237	-445.126	TSeries_508_2	757.644	268.613	-352.436	no cnx
2018_09_10_exp1_TH	1	pyramidal	2	237	-445.126	TSeries_508_1	814.11	322.03	-352.436	no cnx
2018_09_10_exp1_TH	1	pyramidal	2	237	-445.126	TSeries_127_1	411.006	-72.4772	-450.986	no cnx
2018_09_10_exp1_TH	1	pyramidal	2	237	-445.126	TSeries_588_2	420.344	356.464	-448.566	no cnx
2018_09_10_exp1_TH	1	pyramidal	2	237	-445.126	TSeries_588_1	481.015	487.306	-448.566	no cnx
2018_09_10_exp1_TH	1	pyramidal	2	237	-445.126	TSeries_27_2	404.612	-23.1627	-489.916	no cnx
2018_09_10_exp1_TH	1	pyramidal	2	237	-445.126	TSeries_27_1	397.276	112.755	-489.916	no cnx
2018_09_10_exp1_TH	1	pyramidal	2	237	-445.126	TSeries_227_1	787.376	-122.133	-396.046	no cnx
2018_09_10_exp1_TH	1	pyramidal	2	237	-445.126	TSeries_227_2	840.807	-60.0569	-396.046	no cnx
2018_09_10_exp1_TH	1	pyramidal	2	237	-445.126	TSeries_728_2	293.257	-411.035	-542.286	no cnx
2018_09_10_exp1_TH	1	pyramidal	2	237	-445.126	TSeries_728_1	397.117	-464.569	-542.286	no cnx
2018_09_10_exp1_TH	1	pyramidal	2	237	-445.126	TSeries_207_1	417.857	11.1039	-432.656	no cnx
2018_09_10_exp1_TH	1	pyramidal	2	237	-445.126	TSeries_688_1	398.147	-520.956	-515.446	no cnx
2018_09_10_exp1_TH	1	pyramidal	2	237	-445.126	TSeries_688_2	371.147	-514.244	-515.446	no cnx
2018_09_10_exp1_TH	1	pyramidal	2	237	-445.126	TSeries_628_2	437.118	-418.598	-502.676	no cnx
2018_09_10_exp1_TH	1	pyramidal	2	237	-445.126	TSeries_628_3	384.225	-389.444	-502.676	no cnx
2018_09_10_exp1_TH	1	pyramidal	2	237	-445.126	TSeries_628_1	404.968	-383.093	-502.676	no cnx
2018_09_10_exp1_TH	1	pyramidal	2	237	-445.126	TSeries_468_1	912.838	312.463	-366.556	no cnx
2018_09_10_exp1_TH	1	pyramidal	2	237	-445.126	TSeries_468_2	1018.14	469.516	-366.556	no cnx
2018_09_10_exp1_TH	1	pyramidal	2	237	-445.126	TSeries_568_1	898.424	493.862	-394.236	no cnx
2018_09_10_exp1_TH	1	pyramidal	2	237	-445.126	TSeries_167_2	387.77	-8.36199	-438.536	no cnx
2018_09_10_exp1_TH	1	pyramidal	2	237	-445.126	TSeries_167_1	402.88	-63.1708	-438.536	no cnx
2018_09_10_exp1_TH	1	pyramidal	2	237	-445.126	TSeries_768_2	828.876	-63.6395	-409.836	no cnx
2018_09_10_exp1_TH	1	pyramidal	2	237	-445.126	TSeries_768_1	776.833	-123.217	-409.836	no cnx
2018_09_10_exp1_TH	1	pyramidal	2	237	-445.126	TSeries_287_2	949.547	8.44295	-437.376	no cnx
2018_09_10_exp1_TH	1	pyramidal	2	237	-445.126	TSeries_287_1	828.007	-90.3416	-437.376	no cnx
2018_09_10_exp1_CAB	2	pyramidal	2	253	-115.549	TSeries_907_1	645.89	33.2734	-32.89	no cnx
2018_09_10_exp1_CAB	2	pyramidal	2	253	-115.549	TSeries_907_2	644.278	-18.8531	-32.89	no cnx
2018_09_10_exp1_CAB	2	pyramidal	2	253	-115.549	TSeries_907_3	657.151	-25.2993	-32.89	no cnx
2018_09_10_exp1_CAB	2	pyramidal	2	253	-115.549	TSeries_1027_3	709.085	105.277	-83.05	no cnx
2018_09_10_exp1_CAB	2	pyramidal	2	253	-115.549	TSeries_1027_2	596.048	197.922	-83.05	no cnx
2018_09_10_exp1_CAB	2	pyramidal	2	253	-115.549	TSeries_1027_1	742.685	256.005	-83.05	no cnx
2018_09_10_exp1_CAB	2	pyramidal	2	253	-115.549	TSeries_27_2	404.896	151.71	-122.84	no cnx
2018_09_10_exp1_CAB	2	pyramidal	2	253	-115.549	TSeries_27_3	365.49	177.178	-122.84	no cnx
2018_09_10_exp1_CAB	2	pyramidal	2	253	-115.549	TSeries_27_1	490.595	165.208	-122.84	no cnx
2018_09_10_exp1_CAB	2	pyramidal	2	253	-115.549	TSeries_27_4	467.307	2.09773	-122.84	no cnx
2018_09_10_exp1_CAB	2	pyramidal	2	253	-115.549	TSeries_27_5	375.214	51.3278	-122.84	no cnx
2018_09_10_exp1_CAB	2	pyramidal	2	253	-115.549	TSeries_967_2	749.768	87.6576	-54.62	no cnx
2018_09_10_exp1_CAB	2	pyramidal	2	253	-115.549	TSeries_967_1	728.3	279.079	-54.62	no cnx
2018_09_10_exp1_CAB	2	pyramidal	2	253	-115.549	TSeries_1207_6	344.479	4.55971	-30.1	no cnx
2018_09_10_exp1_CAB	2	pyramidal	2	253	-115.549	TSeries_1207_5	380.538	-20.715	-30.1	no cnx
2018_09_10_exp1_CAB	2	pyramidal	2	253	-115.549	TSeries_1207_4	402.163	-16.0687	-30.1	no cnx
2018_09_10_exp1_CAB	2	pyramidal	2	253	-115.549	TSeries_1207_3	417.962	-11.3399	-30.1	excitatory
2018_09_10_exp1_CAB	2	pyramidal	2	253	-115.549	TSeries_1207_2	375.448	41.5576	-30.1	no cnx
2018_09_10_exp1_CAB	2	pyramidal	2	253	-115.549	TSeries_1207_1	466.415	15.6505	-30.1	no cnx
2018_09_10_exp1_CAB	2	pyramidal	2	253	-115.549	TSeries_507_1	396.193	142.625	-44.83	excitatory
2018_09_10_exp1_CAB	2	pyramidal	2	253	-115.549	TSeries_507_2	408.288	101.812	-44.83	no cnx
2018_09_10_exp1_CAB	2	pyramidal	2	253	-115.549	TSeries_507_3	433.25	33.577	-44.83	excitatory
2018_09_10_exp1_CAB	2	pyramidal	2	253	-115.549	TSeries_507_4	385.888	1.32714	-44.83	no cnx
2018_09_10_exp1_CAB	2	pyramidal	2	253	-115.549	TSeries_127_2	473.988	174.007	-80.69	no cnx
2018_09_10_exp1_CAB	2	pyramidal	2	253	-115.549	TSeries_127_3	369.604	178.254	-80.69	no cnx
2018_09_10_exp1_CAB	2	pyramidal	2	253	-115.549	TSeries_127_1	506.692	158.685	-80.69	no cnx
2018_09_10_exp1_CAB	2	pyramidal	2	253	-115.549	TSeries_127_6	385.73	-20.0839	-80.69	no cnx
2018_09_10_exp1_CAB	2	pyramidal	2	253	-115.549	TSeries_127_4	365.22	197.836	-80.69	no cnx
2018_09_10_exp1_CAB	2	pyramidal	2	253	-115.549	TSeries_127_5	349.975	6.06049	-80.69	no cnx
2018_09_10_exp1_CAB	2	pyramidal	2	253	-115.549	TSeries_1007_1	786.446	249.995	-27.61	no cnx
2018_09_10_exp1_CAB	2	pyramidal	2	253	-115.549	TSeries_847_1	749.824	79.4341	-44.48	no cnx
2018_09_10_exp1_CAB	2	pyramidal	2	253	-115.549	TSeries_847_3	643.523	-113.236	-44.48	no cnx
2018_09_10_exp1_CAB	2	pyramidal	2	253	-115.549	TSeries_847_2	666.713	63.5687	-44.48	no cnx
2018_09_10_exp1_CAB	2	pyramidal	2	253	-115.549	TSeries_367_1	460.835	119.568	-61.78	no cnx
2018_09_10_exp1_CAB	2	pyramidal	2	253	-115.549	TSeries_367_2	431.475	52.2478	-61.78	excitatory
2018_09_10_exp1_CAB	2	pyramidal	2	253	-115.549	TSeries_367_3	419.721	45.1309	-61.78	excitatory
2018_09_10_exp1_CAB	2	pyramidal	2	253	-115.549	TSeries_367_4	381.301	88.7933	-61.78	excitatory
2018_09_10_exp1_CAB	2	pyramidal	2	253	-115.549	TSeries_367_5	371.869	142.824	-61.78	no cnx
2018_09_10_exp1_CAB	2	pyramidal	2	253	-115.549	TSeries_367_6	421.545	163.534	-61.78	no cnx
2018_09_10_exp1_CAB	2	pyramidal	2	253	-115.549	TSeries_367_7	358.688	96.6885	-61.78	no cnx
2018_09_10_exp1_CAB	1	pyramidal	2	253	-103.549	TSeries_907_1	646.516	-68.6399	-32.89	no cnx
2018_09_10_exp1_CAB	1	pyramidal	2	253	-103.549	TSeries_907_2	646.512	-120.791	-32.89	no cnx
2018_09_10_exp1_CAB	1	pyramidal	2	253	-103.549	TSeries_907_3	659.578	-126.837	-32.89	no cnx
2018_09_10_exp1_CAB	1	pyramidal	2	253	-103.549	TSeries_1027_3	707.459	5.27928	-83.05	no cnx
2018_09_10_exp1_CAB	1	pyramidal	2	253	-103.549	TSeries_1027_2	591.618	94.3931	-83.05	no cnx
2018_09_10_exp1_CAB	1	pyramidal	2	253	-103.549	TSeries_1027_1	736.394	156.972	-83.05	no cnx
2018_09_10_exp1_CAB	1	pyramidal	2	253	-103.549	TSeries_27_2	401.983	42.3063	-122.84	no cnx
2018_09_10_exp1_CAB	1	pyramidal	2	253	-103.549	TSeries_27_3	361.81	66.5464	-122.84	no cnx
2018_09_10_exp1_CAB	1	pyramidal	2	253	-103.549	TSeries_27_1	487.225	58.4414	-122.84	no cnx
2018_09_10_exp1_CAB	1	pyramidal	2	253	-103.549	TSeries_27_4	468.979	-105.309	-122.84	no cnx
2018_09_10_exp1_CAB	1	pyramidal	2	253	-103.549	TSeries_27_5	375.411	-58.9436	-122.84	no cnx
2018_09_10_exp1_CAB	1	pyramidal	2	253	-103.549	TSeries_967_2	748.666	-11.0772	-54.62	no cnx
2018_09_10_exp1_CAB	1	pyramidal	2	253	-103.549	TSeries_967_1	721.303	179.591	-54.62	no cnx
2018_09_10_exp1_CAB	1	pyramidal	2	253	-103.549	TSeries_1207_6	346.134	-106.638	-30.1	no cnx
2018_09_10_exp1_CAB	1	pyramidal	2	253	-103.549	TSeries_1207_5	382.955	-130.788	-30.1	no cnx
2018_09_10_exp1_CAB	1	pyramidal	2	253	-103.549	TSeries_1207_4	404.426	-125.477	-30.1	no cnx
2018_09_10_exp1_CAB	1	pyramidal	2	253	-103.549	TSeries_1207_3	420.072	-120.263	-30.1	no cnx
2018_09_10_exp1_CAB	1	pyramidal	2	253	-103.549	TSeries_1207_2	375.947	-68.7019	-30.1	no cnx
2018_09_10_exp1_CAB	1	pyramidal	2	253	-103.549	TSeries_1207_1	467.67	-91.7906	-30.1	no cnx
2018_09_10_exp1_CAB	1	pyramidal	2	253	-103.549	TSeries_507_1	393.564	32.9576	-44.83	no cnx
2018_09_10_exp1_CAB	1	pyramidal	2	253	-103.549	TSeries_507_2	406.912	-7.46284	-44.83	excitatory
2018_09_10_exp1_CAB	1	pyramidal	2	253	-103.549	TSeries_507_3	433.967	-74.8957	-44.83	no cnx
2018_09_10_exp1_CAB	1	pyramidal	2	253	-103.549	TSeries_507_4	387.622	-108.591	-44.83	no cnx
2018_09_10_exp1_CAB	1	pyramidal	2	253	-103.549	TSeries_127_2	470.354	66.724	-80.69	no cnx
2018_09_10_exp1_CAB	1	pyramidal	2	253	-103.549	TSeries_127_3	365.889	67.749	-80.69	no cnx
2018_09_10_exp1_CAB	1	pyramidal	2	253	-103.549	TSeries_127_1	503.515	52.4184	-80.69	excitatory
2018_09_10_exp1_CAB	1	pyramidal	2	253	-103.549	TSeries_127_6	388.125	-129.997	-80.69	no cnx
2018_09_10_exp1_CAB	1	pyramidal	2	253	-103.549	TSeries_127_4	360.903	87.1862	-80.69	no cnx
2018_09_10_exp1_CAB	1	pyramidal	2	253	-103.549	TSeries_127_5	351.58	-104.968	-80.69	no cnx
2018_09_10_exp1_CAB	1	pyramidal	2	253	-103.549	TSeries_1007_1	780.32	152.315	-27.61	no cnx
2018_09_10_exp1_CAB	1	pyramidal	2	253	-103.549	TSeries_847_1	748.976	-19.2951	-44.48	no cnx
2018_09_10_exp1_CAB	1	pyramidal	2	253	-103.549	TSeries_847_3	648.669	-215.152	-44.48	no cnx
2018_09_10_exp1_CAB	1	pyramidal	2	253	-103.549	TSeries_847_2	666.394	-37.7166	-44.48	no cnx
2018_09_10_exp1_CAB	1	pyramidal	2	253	-103.549	TSeries_367_1	458.886	11.9048	-61.78	no cnx
2018_09_10_exp1_CAB	1	pyramidal	2	253	-103.549	TSeries_367_2	431.618	-56.2886	-61.78	no cnx
2018_09_10_exp1_CAB	1	pyramidal	2	253	-103.549	TSeries_367_3	420.088	-63.7646	-61.78	no cnx
2018_09_10_exp1_CAB	1	pyramidal	2	253	-103.549	TSeries_367_4	380.339	-21.3082	-61.78	no cnx
2018_09_10_exp1_CAB	1	pyramidal	2	253	-103.549	TSeries_367_5	369.246	32.4062	-61.78	no cnx
2018_09_10_exp1_CAB	1	pyramidal	2	253	-103.549	TSeries_367_6	418.259	54.638	-61.78	excitatory
2018_09_10_exp1_CAB	1	pyramidal	2	253	-103.549	TSeries_367_7	357.494	-14.1142	-61.78	no cnx
2018_07_11_exp2_CAB	2	pyramidal	2		-40.01	TSeries_750_2		-65.288	6.3	no cnx
2018_07_11_exp2_CAB	2	pyramidal	2		-40.01	TSeries_750_3		73.9156	6.3	no cnx
2018_07_11_exp2_CAB	2	pyramidal	2		-40.01	TSeries_750_1		-74.3182	6.3	no cnx
2018_07_11_exp2_CAB	2	pyramidal	2		-40.01	TSeries_386_3		35.0328	-31.73	no cnx
2018_07_11_exp2_CAB	2	pyramidal	2		-40.01	TSeries_386_2		69.6196	-31.73	no cnx
2018_07_11_exp2_CAB	2	pyramidal	2		-40.01	TSeries_386_1		92.6848	-31.73	excitatory
2018_07_11_exp2_CAB	2	pyramidal	2		-40.01	TSeries_26_3		32.9011	-48.41	no cnx
2018_07_11_exp2_CAB	2	pyramidal	2		-40.01	TSeries_26_2		49.1083	-48.41	no cnx
2018_07_11_exp2_CAB	2	pyramidal	2		-40.01	TSeries_26_1		-36.1201	-48.41	no cnx
2018_07_11_exp2_CAB	2	pyramidal	2		-40.01	TSeries_506_1		2.71947	-17.31	no cnx
2018_07_11_exp2_CAB	2	pyramidal	2		-40.01	TSeries_506_3		81.736	-17.31	no cnx
2018_07_11_exp2_CAB	2	pyramidal	2		-40.01	TSeries_506_2		56.9227	-17.31	no cnx
2018_07_11_exp2_CAB	2	pyramidal	2		-40.01	TSeries_506_4		110.903	-17.31	no cnx
2018_07_11_exp2_CAB	2	pyramidal	2		-40.01	TSeries_206_2		79.5841	-61.81	excitatory
2018_07_11_exp2_CAB	2	pyramidal	2		-40.01	TSeries_206_3		6.0491	-61.81	no cnx
2018_07_11_exp2_CAB	2	pyramidal	2		-40.01	TSeries_206_1		62.3465	-61.81	no cnx
2018_07_11_exp2_CAB	2	pyramidal	2		-40.01	TSeries_166_1		-12.741	18.98	no cnx
2018_07_11_exp2_CAB	2	pyramidal	2		-40.01	TSeries_146_1		-17.606	-12.7	no cnx
2018_07_11_exp2_CAB	2	pyramidal	2		-40.01	TSeries_326_1		15.3331	-41.29	no cnx
2018_07_11_exp1_CAB	1	pyramidal	2	229	-247.21	TSeries_206_2	483.184	67.4328	-276.86	no cnx
2018_07_11_exp1_CAB	1	pyramidal	2	229	-247.21	TSeries_206_1	455.42	-17.175	-276.86	no cnx
2018_07_11_exp1_CAB	1	pyramidal	2	229	-247.21	TSeries_689_1	557.678	-157.613	-246.03	no cnx
2018_07_11_exp1_CAB	1	pyramidal	2	229	-247.21	TSeries_689_2	465.59	-360.968	-246.03	no cnx
2018_07_11_exp1_CAB	1	pyramidal	2	229	-247.21	TSeries_266_1	537.159	79.5088	-166.73	no cnx
2018_07_11_exp1_CAB	1	pyramidal	2	229	-247.21	TSeries_266_2	508.795	50.9037	-166.73	no cnx
2018_07_11_exp1_CAB	1	pyramidal	2	229	-247.21	TSeries_266_3	453.868	11.0362	-166.73	no cnx
2018_07_11_exp1_CAB	1	pyramidal	2	229	-247.21	TSeries_246_1	526.124	36.5914	-161.51	no cnx
2018_07_11_exp1_CAB	1	pyramidal	2	229	-247.21	TSeries_326_1	525.328	52.2586	-184.87	no cnx
2018_07_11_exp1_CAB	1	pyramidal	2	229	-247.21	TSeries_326_2	501.593	23.6991	-184.87	no cnx
2018_07_11_exp1_CAB	1	pyramidal	2	229	-247.21	TSeries_629_1	536.971	93.8529	-304.28	no cnx
2018_07_11_exp1_CAB	1	pyramidal	2	229	-247.21	TSeries_529_1	449.17	-5.23528	-240.31	no cnx
2018_07_11_exp1_CAB	1	pyramidal	2	229	-247.21	TSeries_649_1	537.385	-246.959	-275.46	no cnx
2018_07_11_exp1_CAB	1	pyramidal	2	229	-247.21	TSeries_26_1	269.178	27.1135	-212.69	no cnx
2018_07_11_exp1_CAB	1	pyramidal	2	229	-247.21	TSeries_106_1	434.892	71.7517	-267.05	no cnx
2018_07_11_exp1_CAB	1	pyramidal	2	229	-247.21	TSeries_669_1	605.027	-162.599	-263.4	no cnx
2018_07_11_exp1_CAB	1	pyramidal	2	229	-247.21	TSeries_429_1	542.826	53.2564	-220.38	no cnx
2018_07_11_exp1_CAB	1	pyramidal	2	229	-247.21	TSeries_749_1	595.092	-177.593	-225.56	no cnx
2018_07_11_exp1_CAB	1	pyramidal	2	229	-247.21	TSeries_549_2	495.33	17.4498	-255.16	no cnx
2018_07_11_exp1_CAB	1	pyramidal	2	229	-247.21	TSeries_549_1	592.538	22.5805	-255.16	no cnx
2018_07_11_exp1_CAB	1	pyramidal	2	229	-247.21	TSeries_729_1	518.372	-192.055	-238.72	no cnx
2018_07_11_exp1_CAB	1	pyramidal	2	229	-247.21	TSeries_449_2	498.512	43.2854	-232.32	no cnx
2018_07_11_exp1_CAB	1	pyramidal	2	229	-247.21	TSeries_449_1	486.604	37.8053	-232.32	no cnx
2018_07_11_exp1_CAB	1	pyramidal	2	229	-247.21	TSeries_146_1	426.377	98.6177	-161.02	no cnx
2018_07_11_exp1_CAB	1	pyramidal	2	229	-247.21	TSeries_589_1	601.356	39.3052	-264.32	no cnx
2018_07_11_exp1_CAB	1	pyramidal	2	229	-247.21	TSeries_86_1	366.724	16.5267	-165.37	no cnx
2018_07_11_exp1_CAB	1	pyramidal	2	229	-247.21	TSeries_609_1	501.131	65.8155	-279.49	no cnx
2018_07_11_exp1_CAB	1	pyramidal	2	229	-247.21	TSeries_366_1	551.227	14.7934	-202.21	no cnx
2018_07_11_exp1_CAB	1	pyramidal	2	229	-247.21	TSeries_366_3	491.733	121.777	-202.21	no cnx
2018_07_11_exp1_CAB	1	pyramidal	2	229	-247.21	TSeries_366_2	522.534	10.2476	-202.21	no cnx
2018_06_29_exp2_TH	1	pyramidal	2	187	21.139	TSeries_570_2	443.485	71.4509	73.62	no cnx
2018_06_29_exp2_TH	1	pyramidal	2	187	21.139	TSeries_570_3	415.037	107.923	73.62	no cnx
2018_06_29_exp2_TH	1	pyramidal	2	187	21.139	TSeries_570_1	428.558	102.808	73.62	no cnx
2018_06_29_exp2_TH	1	pyramidal	2	187	21.139	TSeries_570_4	422.244	-63.9224	73.62	no cnx
2018_06_29_exp2_TH	1	pyramidal	2	187	21.139	TSeries_409_3	483.03	-16.1996	21.37	no cnx
2018_06_29_exp2_TH	1	pyramidal	2	187	21.139	TSeries_409_2	562.615	-97.591	21.37	no cnx
2018_06_29_exp2_TH	1	pyramidal	2	187	21.139	TSeries_409_4	375.234	-171.85	21.37	no cnx
2018_06_29_exp2_TH	1	pyramidal	2	187	21.139	TSeries_349_1	483.506	77.9498	0	no cnx
2018_06_29_exp2_TH	1	pyramidal	2	187	21.139	TSeries_349_2	443.543	146.954	0	no cnx
2018_06_29_exp2_TH	1	pyramidal	2	187	21.139	TSeries_229_3	497.036	65.8451	26.89	no cnx
2018_06_29_exp2_TH	1	pyramidal	2	187	21.139	TSeries_229_1	379.649	17.9355	26.89	no cnx
2018_06_29_exp2_TH	1	pyramidal	2	187	21.139	TSeries_229_6	424.493	101.383	26.89	no cnx
2018_06_29_exp2_TH	1	pyramidal	2	187	21.139	TSeries_229_5	489.584	-42.6832	26.89	no cnx
2018_06_29_exp2_TH	1	pyramidal	2	187	21.139	TSeries_229_4	386.069	3.70238	26.89	no cnx
2018_06_29_exp2_TH	1	pyramidal	2	187	21.139	TSeries_29_1	344.606	126.448	-9.393	no cnx
2018_06_29_exp2_TH	1	pyramidal	2	187	21.139	TSeries_29_2	437.751	36.1929	-9.393	excitatory
2018_06_29_exp2_TH	1	pyramidal	2	187	21.139	TSeries_29_3	442.709	-5.95292	-9.393	no cnx
2018_06_29_exp2_TH	1	pyramidal	2	187	21.139	TSeries_189_2	443.642	92.2239	-4.77	no cnx
2018_06_29_exp2_TH	1	pyramidal	2	187	21.139	TSeries_189_1	369.943	69.3388	-4.77	no cnx
2018_06_29_exp2_TH	1	pyramidal	2	187	21.139	TSeries_389_1	341.653	109.814	-24.6	no cnx
2018_06_29_exp2_TH	1	pyramidal	2	187	21.139	TSeries_529_1	353.925	-102.985	40.16	no cnx
2018_06_29_exp2_TH	1	pyramidal	2	187	21.139	TSeries_529_2	432.929	-103.789	40.16	no cnx
2018_06_29_exp1_TH	1	pyramidal	2	215	-91.638	TSeries_448_4	464.949	90.7703	-64	no cnx
2018_06_29_exp1_TH	1	pyramidal	2	215	-91.638	TSeries_448_5	391.442	53.5247	-64	excitatory
2018_06_29_exp1_TH	1	pyramidal	2	215	-91.638	TSeries_448_2	430.61	98.7075	-64	no cnx
2018_06_29_exp1_TH	1	pyramidal	2	215	-91.638	TSeries_448_3	385.193	9.53516	-64	excitatory
2018_06_29_exp1_TH	1	pyramidal	2	215	-91.638	TSeries_448_1	436.219	-37.1402	-64	excitatory
2018_06_29_exp1_TH	1	pyramidal	2	215	-91.638	TSeries_327_4	464.389	72.7281	-102	no cnx
2018_06_29_exp1_TH	1	pyramidal	2	215	-91.638	TSeries_327_6	376.483	142.469	-102	no cnx
2018_06_29_exp1_TH	1	pyramidal	2	215	-91.638	TSeries_327_1	448.628	79.0667	-102	no cnx
2018_06_29_exp1_TH	1	pyramidal	2	215	-91.638	TSeries_327_3	368.887	80.6891	-102	no cnx
2018_06_29_exp1_TH	1	pyramidal	2	215	-91.638	TSeries_748_1	297.893	-79.6897	-45	no cnx
2018_06_29_exp1_TH	1	pyramidal	2	215	-91.638	TSeries_748_3	369.135	76.7169	-45	excitatory
2018_06_29_exp1_TH	1	pyramidal	2	215	-91.638	TSeries_748_2	435.801	12.4621	-45	no cnx
2018_06_29_exp1_TH	1	pyramidal	2	215	-91.638	TSeries_748_5	293.046	78.9076	-45	no cnx
2018_06_29_exp1_TH	1	pyramidal	2	215	-91.638	TSeries_748_4	331.331	-78.2285	-45	no cnx
2018_06_29_exp1_TH	1	pyramidal	2	215	-91.638	TSeries_748_6	450.955	-50.0806	-45	no cnx
2018_06_29_exp1_TH	1	pyramidal	2	215	-91.638	TSeries_167_4	426.567	165.337	-94	excitatory
2018_06_29_exp1_TH	1	pyramidal	2	215	-91.638	TSeries_167_2	488.714	-18.9473	-94	no cnx
2018_06_29_exp1_TH	1	pyramidal	2	215	-91.638	TSeries_167_3	416.496	71.3765	-94	no cnx
2018_06_29_exp1_TH	1	pyramidal	2	215	-91.638	TSeries_167_1	409.224	25.5446	-94	excitatory
2018_06_29_exp1_TH	1	pyramidal	2	215	-91.638	TSeries_27_3	352.752	-88.3267	-110	excitatory
2018_06_29_exp1_TH	1	pyramidal	2	215	-91.638	TSeries_27_1	311.611	-79.9512	-110	no cnx
2018_06_29_exp1_TH	1	pyramidal	2	215	-91.638	TSeries_27_6	338.685	139.16	-36.538	excitatory
2018_06_29_exp1_TH	1	pyramidal	2	215	-91.638	TSeries_27_7	212.189	-114.121	-36.538	no cnx
2018_06_29_exp1_TH	1	pyramidal	2	215	-91.638	TSeries_27_4	322.948	80.4156	-110	no cnx
2018_06_29_exp1_TH	1	pyramidal	2	215	-91.638	TSeries_27_5	287.101	-84.6994	-36.538	no cnx
2018_06_29_exp1_TH	1	pyramidal	2	215	-91.638	TSeries_648_1	421.549	65.6064	-59	excitatory
2018_06_29_exp1_TH	1	pyramidal	2	215	-91.638	TSeries_648_2	409.552	189.613	-59	excitatory
2018_06_29_exp1_TH	1	pyramidal	2	215	-91.638	TSeries_648_3	405.049	68.2765	-59	no cnx
2018_06_29_exp1_TH	1	pyramidal	2	215	-91.638	TSeries_648_4	444.996	92.82	-59	no cnx
2018_06_29_exp1_TH	1	pyramidal	2	215	-91.638	TSeries_868_1	426.208	27.2415	-30	excitatory
2018_06_29_exp1_TH	1	pyramidal	2	215	-91.638	TSeries_868_2	366.968	61.7913	-30	no cnx
2018_06_29_exp1_TH	1	pyramidal	2	215	-91.638	TSeries_868_3	408.003	125.033	-30	excitatory
2018_06_29_exp1_TH	1	pyramidal	2	215	-91.638	TSeries_928_1	387.405	15.7812	-18	no cnx
2018_06_29_exp1_TH	1	pyramidal	2	215	-91.638	TSeries_928_3	447.488	39.5295	-18	no cnx
2018_06_29_exp1_TH	1	pyramidal	2	215	-91.638	TSeries_928_2	320.259	97.5425	-18	no cnx
2018_06_29_exp1_AB	1	pyramidal	2	180	69	TSeries_1331_1	389.098	-371.325	-33.24	no cnx
2018_06_29_exp1_AB	1	pyramidal	2	180	69	TSeries_1331_3	398.832	-207.809	-33.24	no cnx
2018_06_29_exp1_AB	1	pyramidal	2	180	69	TSeries_1331_2	380.874	-333.621	-33.24	no cnx
2018_06_29_exp1_AB	1	pyramidal	2	180	69	TSeries_1331_5	536.785	-205.533	-33.24	no cnx
2018_06_29_exp1_AB	1	pyramidal	2	180	69	TSeries_1331_4	387.589	-217.968	-33.24	no cnx
2018_06_29_exp1_AB	1	pyramidal	2	180	69	TSeries_1331_6	457.431	-121.146	-33.24	excitatory
2018_06_29_exp1_AB	1	pyramidal	2	180	69	TSeries_1291_2	402.929	-274.485	-20.26	no cnx
2018_06_29_exp1_AB	1	pyramidal	2	180	69	TSeries_1291_1	397.005	-190.574	-20.26	excitatory
2018_06_29_exp1_AB	1	pyramidal	2	180	69	TSeries_1531_3	366.251	-511.165	-1.57	no cnx
2018_06_29_exp1_AB	1	pyramidal	2	180	69	TSeries_1531_2	427.933	-439.368	-1.57	no cnx
2018_06_29_exp1_AB	1	pyramidal	2	180	69	TSeries_1531_1	413.934	-516.78	-1.57	no cnx
2018_06_29_exp1_AB	1	pyramidal	2	180	69	TSeries_210_1	352.701	-128.739	97.39	no cnx
2018_06_29_exp1_AB	1	pyramidal	2	180	69	TSeries_90_1	476.089	-9.59417	74.61	no cnx
2018_06_29_exp1_AB	1	pyramidal	2	180	69	TSeries_90_2	456.698	-22.359	74.61	no cnx
2018_06_29_exp1_AB	1	pyramidal	2	180	69	TSeries_90_3	385.709	67.1187	74.61	no cnx
2018_06_29_exp1_AB	1	pyramidal	2	180	69	TSeries_90_4	405.653	-25.6695	74.61	no cnx
2018_06_29_exp1_AB	1	pyramidal	2	180	69	TSeries_90_5	331.743	57.0583	74.61	no cnx
2018_06_29_exp1_AB	1	pyramidal	2	180	69	TSeries_710_5	430.762	68.2575	15.01	no cnx
2018_06_29_exp1_AB	1	pyramidal	2	180	69	TSeries_1151_1	482.721	-293.113	3.32	no cnx
2018_06_29_exp1_AB	1	pyramidal	2	180	69	TSeries_1151_3	450.135	-216.012	3.32	no cnx
2018_06_29_exp1_AB	1	pyramidal	2	180	69	TSeries_1151_2	483.949	-181.038	3.32	no cnx
2018_06_29_exp1_AB	1	pyramidal	2	180	69	TSeries_1151_5	350.171	-273.084	3.32	no cnx
2018_06_29_exp1_AB	1	pyramidal	2	180	69	TSeries_1151_4	392.839	-225.432	3.32	no cnx
2018_06_29_exp1_AB	1	pyramidal	2	180	69	TSeries_1151_7	397.054	-176.444	3.32	no cnx
2018_06_29_exp1_AB	1	pyramidal	2	180	69	TSeries_1151_6	358.412	-192.577	3.32	no cnx
2018_06_29_exp1_AB	1	pyramidal	2	180	69	TSeries_270_10	461.034	70.9951	34.15	excitatory
2018_06_29_exp1_AB	1	pyramidal	2	180	69	TSeries_270_9	488.135	87.3149	34.15	excitatory
2018_06_29_exp1_AB	1	pyramidal	2	180	69	TSeries_270_8	450.12	161.317	34.15	no cnx
2018_06_29_exp1_AB	1	pyramidal	2	180	69	TSeries_270_5	307.262	60.6988	34.15	no cnx
2018_06_29_exp1_AB	1	pyramidal	2	180	69	TSeries_270_4	496.604	47.2619	34.15	no cnx
2018_06_29_exp1_AB	1	pyramidal	2	180	69	TSeries_270_7	385.156	138.625	34.15	no cnx
2018_06_29_exp1_AB	1	pyramidal	2	180	69	TSeries_270_6	335.151	107.535	34.15	no cnx
2018_06_29_exp1_AB	1	pyramidal	2	180	69	TSeries_270_1	443.513	-62.2393	34.15	no cnx
2018_06_29_exp1_AB	1	pyramidal	2	180	69	TSeries_270_3	512.194	18.473	34.15	no cnx
2018_06_29_exp1_AB	1	pyramidal	2	180	69	TSeries_270_2	447.053	10.9256	34.15	excitatory
2018_06_29_exp1_AB	1	pyramidal	2	180	69	TSeries_910_1	495.63	-199.039	35.8	no cnx
2018_06_29_exp1_AB	1	pyramidal	2	180	69	TSeries_910_2	578.883	-63.001	35.8	no cnx
2018_06_29_exp1_AB	1	pyramidal	2	180	69	TSeries_910_3	548.265	-90.2214	35.8	no cnx
2018_06_29_exp1_AB	1	pyramidal	2	180	69	TSeries_910_4	477.692	-109.763	35.8	no cnx
2018_06_29_exp1_AB	1	pyramidal	2	180	69	TSeries_470_3	394.31	173.642	17.6	excitatory
2018_06_29_exp1_AB	1	pyramidal	2	180	69	TSeries_470_2	426.38	180.517	17.6	no cnx
2018_06_29_exp1_AB	1	pyramidal	2	180	69	TSeries_470_1	468.115	54.0115	17.6	excitatory
2018_06_29_exp1_AB	1	pyramidal	2	180	69	TSeries_470_4	332.14	61.4983	17.6	no cnx
2018_06_29_exp1_AB	1	pyramidal	2	180	69	TSeries_190_1	397.783	-91.9906	87.67	no cnx
2018_06_29_exp1_AB	1	pyramidal	2	180	69	TSeries_230_2	409.262	108.939	55.22	no cnx
2018_06_29_exp1_AB	1	pyramidal	2	180	69	TSeries_1451_1	471.279	-289.613	-0.11	no cnx
2018_06_29_exp1_AB	1	pyramidal	2	180	69	TSeries_1451_2	381.172	-221.341	-0.11	no cnx
2018_06_29_exp1_AB	1	pyramidal	2	180	69	TSeries_1451_3	287.921	-295.364	-0.11	no cnx
2018_06_29_exp1_AB	1	pyramidal	2	180	69	TSeries_1451_4	285.7	-366.467	-0.11	no cnx
2018_06_29_exp1_AB	1	pyramidal	2	180	69	TSeries_30_2	275.559	-116.542	54.22	no cnx
2018_06_29_exp1_AB	1	pyramidal	2	180	69	TSeries_30_3	324.434	-61.9596	54.22	no cnx
2018_06_29_exp1_AB	1	pyramidal	2	180	69	TSeries_30_1	295.67	-131.739	54.22	no cnx
2018_06_29_exp1_AB	1	pyramidal	2	180	69	TSeries_990_8	484.845	-190.972	67.54	no cnx
2018_06_29_exp1_AB	1	pyramidal	2	180	69	TSeries_990_1	517.807	2.74168	67.54	no cnx
2018_06_29_exp1_AB	1	pyramidal	2	180	69	TSeries_990_2	520.216	-20.0211	67.54	no cnx
2018_06_29_exp1_AB	1	pyramidal	2	180	69	TSeries_990_3	523.629	-40.0929	67.54	no cnx
2018_06_29_exp1_AB	1	pyramidal	2	180	69	TSeries_990_4	528.178	-74.7619	67.54	no cnx
2018_06_29_exp1_AB	1	pyramidal	2	180	69	TSeries_990_5	490.988	-111.24	67.54	no cnx
2018_06_29_exp1_AB	1	pyramidal	2	180	69	TSeries_990_6	455.81	-14.0211	67.54	no cnx
2018_06_29_exp1_AB	1	pyramidal	2	180	69	TSeries_990_7	437.626	-209.884	67.54	no cnx
2018_06_28_exp2_AB	0	pyramidal	2	210	-7.736	TSeries_169_4	404.191	157.578	-56.691	no cnx
2018_06_28_exp2_AB	0	pyramidal	2	210	-7.736	TSeries_169_2	253.224	60.4363	-56.691	no cnx
2018_06_28_exp2_AB	0	pyramidal	2	210	-7.736	TSeries_169_3	398.464	174.733	-56.691	no cnx
2018_06_28_exp2_AB	0	pyramidal	2	210	-7.736	TSeries_429_1	559.214	-96.1082	-56.691	no cnx
2018_06_28_exp2_AB	0	pyramidal	2	210	-7.736	TSeries_429_3	476.755	114.725	-56.691	no cnx
2018_06_28_exp2_AB	0	pyramidal	2	210	-7.736	TSeries_429_2	512.071	-7.37432	-56.691	no cnx
2018_06_28_exp2_AB	0	pyramidal	2	210	-7.736	TSeries_429_4	286.971	-2.45319	-56.691	no cnx
2018_06_28_exp2_AB	0	pyramidal	2	210	-7.736	TSeries_609_1	299.175	-217	-56.691	no cnx
2018_06_28_exp2_AB	0	pyramidal	2	210	-7.736	TSeries_609_3	312.24	-128.025	-56.691	no cnx
2018_06_28_exp2_AB	0	pyramidal	2	210	-7.736	TSeries_609_2	275.734	-162.064	-56.691	no cnx
2018_06_28_exp2_AB	0	pyramidal	2	210	-7.736	TSeries_509_2	406.06	-85.7545	-56.691	no cnx
2018_06_28_exp2_AB	0	pyramidal	2	210	-7.736	TSeries_509_3	413.57	7.05665	-56.691	no cnx
2018_06_28_exp2_AB	0	pyramidal	2	210	-7.736	TSeries_509_1	420.086	-126.781	-56.691	no cnx
2018_06_28_exp2_AB	0	pyramidal	2	210	-7.736	TSeries_509_4	394.638	29.015	-56.691	no cnx
2018_06_28_exp2_AB	0	pyramidal	2	210	-7.736	TSeries_509_5	496.864	7.59464	-56.691	excitatory
2018_06_28_exp2_AB	0	pyramidal	2	210	-7.736	TSeries_249_4	467.779	-0.361616	-56.691	no cnx
2018_06_28_exp2_AB	0	pyramidal	2	210	-7.736	TSeries_249_2	420.001	13.4109	-56.691	no cnx
2018_06_28_exp2_AB	0	pyramidal	2	210	-7.736	TSeries_389_1	496.963	48.7351	-56.691	no cnx
2018_06_28_exp2_AB	0	pyramidal	2	210	-7.736	TSeries_389_2	369.432	62.9032	-56.691	no cnx
2018_06_28_exp2_AB	0	pyramidal	2	210	-7.736	TSeries_670_1	292.477	-266.362	-56.691	no cnx
2018_06_28_exp2_AB	0	pyramidal	2	210	-7.736	TSeries_670_2	373.471	-266.564	-56.691	no cnx
2018_06_28_exp2_AB	0	pyramidal	2	210	-7.736	TSeries_329_2	469.996	62.0094	-56.691	no cnx
2018_06_28_exp2_AB	0	pyramidal	2	210	-7.736	TSeries_27_1	352.267	-88.6041	-56.691	no cnx
2018_06_28_exp2_AB	0	pyramidal	2	210	-7.736	TSeries_107_1	402.393	109.265	-56.691	no cnx
2018_06_28_exp2_AB	0	pyramidal	2	210	-7.736	TSeries_107_2	354.548	100.657	-56.691	no cnx
2018_06_28_exp2_AB	0	pyramidal	2	210	-7.736	TSeries_107_3	229.875	72.0567	-56.691	no cnx
2018_06_28_exp1_CAB	2	pyramidal	2	201	58.62	TSeries_109_2	340.191	-16.0366	155.02	no cnx
2018_06_28_exp1_CAB	2	pyramidal	2	201	58.62	TSeries_109_1	227.423	23.6639	155.02	no cnx
2018_06_28_exp1_CAB	2	pyramidal	2	201	58.62	TSeries_309_1	495.978	36.2967	90.21	no cnx
2018_06_28_exp1_CAB	2	pyramidal	2	201	58.62	TSeries_309_2	449.256	117.288	90.21	no cnx
2018_06_28_exp1_CAB	2	pyramidal	2	201	58.62	TSeries_309_3	414.114	49.1582	90.21	no cnx
2018_06_28_exp1_CAB	2	pyramidal	2	201	58.62	TSeries_309_4	479.699	77.4211	90.21	no cnx
2018_06_28_exp1_CAB	2	pyramidal	2	201	58.62	TSeries_89_1	161.497	-130.288	132.94	no cnx
2018_06_28_exp1_CAB	2	pyramidal	2	201	58.62	TSeries_149_2	408.988	17.4868	69.43	excitatory
2018_06_28_exp1_CAB	2	pyramidal	2	201	58.62	TSeries_149_3	420.147	110.598	69.43	no cnx
2018_06_28_exp1_CAB	2	pyramidal	2	201	58.62	TSeries_149_1	389.346	-12.9872	69.43	excitatory
2018_06_28_exp1_CAB	2	pyramidal	2	201	58.62	TSeries_46_1	323.91	-16.389	18.63	no cnx
2018_06_28_exp1_CAB	2	pyramidal	2	201	58.62	TSeries_69_1	258.953	-86.2976	75.41	no cnx
2018_06_28_exp1_CAB	2	pyramidal	2	201	58.62	TSeries_26_1	260.247	58.0198	11.86	no cnx
2018_06_18_exp2_TH	1	pyramidal	2	209	-87.622	TSeries_67_4	352.921	46.4606	-78.362	no cnx
2018_06_18_exp2_TH	1	pyramidal	2	209	-87.622	TSeries_67_2	413.978	72.5176	-78.362	excitatory
2018_06_18_exp2_TH	1	pyramidal	2	209	-87.622	TSeries_67_3	376.008	-3.92821	-78.362	no cnx
2018_06_18_exp2_TH	1	pyramidal	2	209	-87.622	TSeries_67_1	370.995	-20.4667	-78.362	no cnx
2018_06_18_exp2_TH	1	pyramidal	2	209	-87.622	TSeries_228_2	476.602	-33.8736	-49.422	no cnx
2018_06_18_exp2_TH	1	pyramidal	2	209	-87.622	TSeries_228_1	379.264	-30.1474	-49.422	no cnx
2018_06_18_exp2_TH	1	pyramidal	2	209	-87.622	TSeries_348_1	426.101	71.2878	-26.722	no cnx
2018_06_18_exp2_TH	1	pyramidal	2	209	-87.622	TSeries_348_2	440.356	-5.42356	-26.722	no cnx
2018_06_18_exp2_TH	1	pyramidal	2	209	-87.622	TSeries_388_1	362.965	41.1355	-3.262	no cnx
2018_06_18_exp2_TH	1	pyramidal	2	209	-87.622	TSeries_388_3	381.596	11.0185	-3.262	no cnx
2018_06_18_exp2_TH	1	pyramidal	2	209	-87.622	TSeries_388_2	329.267	119.093	-3.262	no cnx
2018_06_18_exp2_TH	1	pyramidal	2	209	-87.622	TSeries_388_5	403.53	197.226	-3.262	no cnx
2018_06_18_exp2_TH	1	pyramidal	2	209	-87.622	TSeries_388_4	315.015	47.2372	-3.262	no cnx
2018_06_18_exp2_TH	1	pyramidal	2	209	-87.622	TSeries_489_3	442.841	45.0172	1.488	no cnx
2018_06_18_exp2_TH	1	pyramidal	2	209	-87.622	TSeries_489_2	493	-15.9197	1.488	no cnx
2018_06_18_exp2_TH	1	pyramidal	2	209	-87.622	TSeries_489_1	429.47	25.7033	1.488	no cnx
2018_06_18_exp2_TH	1	pyramidal	2	209	-87.622	TSeries_489_4	514.337	62.9009	1.488	no cnx
2018_06_18_exp2_TH	1	pyramidal	2	209	-87.622	TSeries_830_3	344.531	-298.515	-68.412	no cnx
2018_06_18_exp2_TH	1	pyramidal	2	209	-87.622	TSeries_830_2	537.349	-296.359	-68.412	no cnx
2018_06_18_exp2_TH	1	pyramidal	2	209	-87.622	TSeries_830_1	357.922	-283.05	-68.412	no cnx
2018_06_18_exp2_TH	1	pyramidal	2	209	-87.622	TSeries_187_1	355.533	55.2279	-55.502	no cnx
2018_06_18_exp2_TH	1	pyramidal	2	209	-87.622	TSeries_187_2	368.127	64.5328	-55.502	excitatory
2018_06_18_exp2_TH	1	pyramidal	2	209	-87.622	TSeries_610_3	510.955	95.3914	15.818	no cnx
2018_06_18_exp2_TH	1	pyramidal	2	209	-87.622	TSeries_610_2	445.227	78.4998	15.818	no cnx
2018_06_18_exp2_TH	1	pyramidal	2	209	-87.622	TSeries_610_1	409.95	15.7721	15.818	no cnx
2018_06_18_exp2_TH	1	pyramidal	2	209	-87.622	TSeries_268_4	300.397	78.5252	-34.402	no cnx
2018_06_18_exp2_TH	1	pyramidal	2	209	-87.622	TSeries_268_2	385.529	139.01	-34.402	no cnx
2018_06_18_exp2_TH	1	pyramidal	2	209	-87.622	TSeries_268_3	419.974	65.2902	-34.402	no cnx
2018_06_18_exp2_TH	1	pyramidal	2	209	-87.622	TSeries_268_1	425.468	82.0614	-34.402	no cnx
2018_06_18_exp2_TH	1	pyramidal	2	209	-87.622	TSeries_770_1	310.115	71.1923	39.298	no cnx
2018_06_18_exp2_TH	1	pyramidal	2	209	-87.622	TSeries_770_2	268.099	-64.8918	39.298	no cnx
2018_06_18_exp2_TH	1	pyramidal	2	209	-87.622	TSeries_770_3	462.338	-76.9692	39.298	no cnx
2018_06_18_exp2_TH	1	pyramidal	2	209	-87.622	TSeries_27_1	291.761	20.5789	-85.402	no cnx
2018_06_18_exp2_TH	1	pyramidal	2	209	-87.622	TSeries_930_2	406.949	-311.277	-10.202	no cnx
2018_06_18_exp2_TH	1	pyramidal	2	209	-87.622	TSeries_930_3	360.384	-275.532	-10.202	no cnx
2018_06_18_exp2_TH	1	pyramidal	2	209	-87.622	TSeries_930_1	425.171	-262.494	-10.202	no cnx
2018_06_18_exp2_TH	1	pyramidal	2	209	-87.622	TSeries_670_1	246.943	31.5817	29.758	direct
2018_06_18_exp2_TH	1	pyramidal	2	209	-87.622	TSeries_670_3	278.998	121.62	29.758	no cnx
2018_06_18_exp2_TH	1	pyramidal	2	209	-87.622	TSeries_670_2	332.012	-118.276	29.758	no cnx
2018_06_18_exp2_TH	1	pyramidal	2	209	-87.622	TSeries_670_5	260.365	-107.294	29.758	no cnx
2018_06_18_exp2_TH	1	pyramidal	2	209	-87.622	TSeries_670_4	303.723	29.9522	29.758	no cnx
2018_06_18_exp2_TH	1	pyramidal	2	209	-87.622	TSeries_569_1	346.113	-5.90568	5.378	no cnx
2018_06_18_exp2_TH	1	pyramidal	2	209	-87.622	TSeries_890_1	314.119	-223.235	-59.262	no cnx
2018_06_18_exp2_TH	1	pyramidal	2	209	-87.622	TSeries_890_2	559.644	-253.713	-59.262	no cnx
2018_06_18_exp2_TH	1	pyramidal	2	209	-87.622	TSeries_147_1	349.197	15.359	-72.182	excitatory
2018_06_18_exp2_AB	2	pyramidal	2	230	8.57	TSeries_797_1	271.941	341.47	40.87	no cnx
2018_06_18_exp2_AB	2	pyramidal	2	230	8.57	TSeries_676_1	476.801	264.888	55.12	no cnx
2018_06_18_exp2_AB	2	pyramidal	2	230	8.57	TSeries_857_1	461.678	315.039	161.94	no cnx
2018_06_18_exp2_AB	2	pyramidal	2	230	8.57	TSeries_31_2	391.469	127.524	54.97	no cnx
2018_06_18_exp2_AB	2	pyramidal	2	230	8.57	TSeries_31_1	398.201	52.211	54.97	no cnx
2018_06_18_exp2_AB	2	pyramidal	2	230	8.57	TSeries_877_1	584.499	352.584	143.87	no cnx
2018_06_18_exp2_AB	2	pyramidal	2	230	8.57	TSeries_111_1	495.269	174.274	21.16	no cnx
2018_06_18_exp2_AB	2	pyramidal	2	230	8.57	TSeries_111_2	508.098	240.536	21.16	no cnx
2018_06_18_exp2_AB	2	pyramidal	2	230	8.57	TSeries_1427_2	255.535	13.0315	74.01	no cnx
2018_06_18_exp2_AB	2	pyramidal	2	230	8.57	TSeries_1427_1	291.249	-10.3881	74.01	no cnx
2018_06_18_exp2_AB	2	pyramidal	2	230	8.57	TSeries_1407_1	389.998	8.50278	54.69	no cnx
2018_06_18_exp2_AB	2	pyramidal	2	230	8.57	TSeries_817_1	537.518	221.353	35.65	no cnx
2018_06_18_exp2_AB	2	pyramidal	2	230	8.57	TSeries_1206_2	370.45	97.6253	26.12	no cnx
2018_06_18_exp2_AB	2	pyramidal	2	230	8.57	TSeries_1206_1	365.898	59.7673	26.12	no cnx
2018_06_18_exp2_AB	2	pyramidal	2	230	8.57	TSeries_757_2	317.323	492.772	108.54	no cnx
2018_06_18_exp2_AB	2	pyramidal	2	230	8.57	TSeries_432_1	580.936	127.287	84.54	no cnx
2018_06_18_exp2_AB	2	pyramidal	2	230	8.57	TSeries_432_3	431.94	86.2775	84.54	no cnx
2018_06_18_exp2_AB	2	pyramidal	2	230	8.57	TSeries_432_2	470.676	209.834	84.54	no cnx
2018_06_18_exp2_AB	2	pyramidal	2	230	8.57	TSeries_432_4	408.702	48.0938	84.54	no cnx
2018_06_18_exp2_AB	2	pyramidal	2	230	8.57	TSeries_516_4	582.033	-54.5474	46.4	no cnx
2018_06_18_exp2_AB	2	pyramidal	2	230	8.57	TSeries_516_3	508.83	-73.0176	46.4	no cnx
2018_06_18_exp2_AB	2	pyramidal	2	230	8.57	TSeries_516_1	528.044	119.106	46.4	no cnx
2018_06_18_exp2_AB	2	pyramidal	2	230	8.57	TSeries_71_1	360.064	140.918	36.75	no cnx
2018_06_18_exp2_AB	2	pyramidal	2	230	8.57	TSeries_636_1	620.914	-84.9333	38.7	no cnx
2018_06_18_exp2_AB	2	pyramidal	2	230	8.57	TSeries_151_6	387.758	91.1192	58.83	no cnx
2018_06_18_exp2_AB	2	pyramidal	2	230	8.57	TSeries_151_1	533.595	138.971	58.83	no cnx
2018_06_18_exp2_AB	2	pyramidal	2	230	8.57	TSeries_151_3	487.263	266.994	58.83	no cnx
2018_06_18_exp2_AB	2	pyramidal	2	230	8.57	TSeries_151_2	481.984	222.415	58.83	no cnx
2018_06_18_exp2_AB	2	pyramidal	2	230	8.57	TSeries_596_2	534.106	-102.98	53.43	no cnx
2018_06_18_exp2_AB	2	pyramidal	2	230	8.57	TSeries_596_1	649.159	-131.594	53.43	no cnx
2018_06_18_exp2_AB	2	pyramidal	2	230	8.57	TSeries_1246_2	413.291	57.3831	50.56	no cnx
2018_06_18_exp2_AB	2	pyramidal	2	230	8.57	TSeries_1246_3	380.372	78.8999	50.56	no cnx
2018_06_18_exp2_AB	2	pyramidal	2	230	8.57	TSeries_1246_1	391.471	18.8959	50.56	no cnx
2018_06_18_exp2_AB	2	pyramidal	2	230	8.57	TSeries_716_1	386.783	401.786	118.35	no cnx
2018_06_18_exp2_AB	2	pyramidal	2	230	8.57	TSeries_716_2	384.086	456.73	118.35	no cnx
2018_06_18_exp2_AB	2	pyramidal	2	230	8.57	TSeries_1306_1	403.843	36.6037	46.64	no cnx
2018_06_18_exp2_AB	2	pyramidal	2	230	8.57	TSeries_1367_1	366.757	11.8207	8.65	no cnx
2018_06_18_exp2_AB	2	pyramidal	2	230	8.57	TSeries_1125_1	508.442	112.26	14.79	no cnx
2018_06_18_exp2_AB	2	pyramidal	2	230	8.57	TSeries_1125_2	341.119	119.936	14.79	no cnx
2018_06_18_exp2_AB	2	pyramidal	2	230	8.57	TSeries_1165_1	400.33	172.173	43.58	excitatory
2018_06_18_exp2_AB	2	pyramidal	2	230	8.57	TSeries_91_1	376.803	178.655	-15.39	no cnx
2018_06_18_exp2_AB	2	pyramidal	2	230	8.57	TSeries_1045_2	385.834	380.515	103.2	no cnx
2018_06_18_exp2_AB	2	pyramidal	2	230	8.57	TSeries_1045_1	573.158	377.922	103.2	no cnx
2018_06_18_exp2_AB	2	pyramidal	2	230	8.57	TSeries_1085_2	493.591	442.393	38.56	no cnx
2018_06_18_exp2_AB	2	pyramidal	2	230	8.57	TSeries_1085_1	470.693	244.419	38.56	no cnx
2018_06_18_exp2_AB	2	pyramidal	2	230	8.57	TSeries_897_2	541.568	277.533	83.39	no cnx
2018_06_18_exp2_AB	2	pyramidal	2	230	8.57	TSeries_897_1	558.188	282.333	83.39	no cnx
2018_06_18_exp2_AB	2	pyramidal	2	230	8.57	TSeries_272_3	410.198	205.353	66.89	excitatory
2018_06_18_exp2_AB	2	pyramidal	2	230	8.57	TSeries_272_2	411.648	285.198	66.89	no cnx
2018_06_18_exp2_AB	1	pyramidal	2	230	25.57	TSeries_797_1	247.6	206.433	40.87	no cnx
2018_06_18_exp2_AB	1	pyramidal	2	230	25.57	TSeries_676_1	452.46	129.851	55.12	no cnx
2018_06_18_exp2_AB	1	pyramidal	2	230	25.57	TSeries_857_1	437.337	180.002	161.94	no cnx
2018_06_18_exp2_AB	1	pyramidal	2	230	25.57	TSeries_31_2	367.128	-7.51273	54.97	no cnx
2018_06_18_exp2_AB	1	pyramidal	2	230	25.57	TSeries_31_1	373.86	-82.8258	54.97	no cnx
2018_06_18_exp2_AB	1	pyramidal	2	230	25.57	TSeries_877_1	560.158	217.548	143.87	no cnx
2018_06_18_exp2_AB	1	pyramidal	2	230	25.57	TSeries_111_1	470.928	39.2375	21.16	no cnx
2018_06_18_exp2_AB	1	pyramidal	2	230	25.57	TSeries_111_2	483.756	105.5	21.16	no cnx
2018_06_18_exp2_AB	1	pyramidal	2	230	25.57	TSeries_817_1	513.177	86.3163	35.65	no cnx
2018_06_18_exp2_AB	1	pyramidal	2	230	25.57	TSeries_757_2	292.982	357.735	108.54	no cnx
2018_06_18_exp2_AB	1	pyramidal	2	230	25.57	TSeries_432_1	556.595	-7.74957	84.54	no cnx
2018_06_18_exp2_AB	1	pyramidal	2	230	25.57	TSeries_432_3	407.598	-48.7594	84.54	no cnx
2018_06_18_exp2_AB	1	pyramidal	2	230	25.57	TSeries_432_2	446.335	74.7974	84.54	no cnx
2018_06_18_exp2_AB	1	pyramidal	2	230	25.57	TSeries_432_4	384.361	-86.9431	84.54	no cnx
2018_06_18_exp2_AB	1	pyramidal	2	230	25.57	TSeries_516_4	557.692	-189.584	46.4	no cnx
2018_06_18_exp2_AB	1	pyramidal	2	230	25.57	TSeries_516_3	484.489	-208.054	46.4	no cnx
2018_06_18_exp2_AB	1	pyramidal	2	230	25.57	TSeries_516_1	503.703	-15.9309	46.4	no cnx
2018_06_18_exp2_AB	1	pyramidal	2	230	25.57	TSeries_71_1	335.723	5.88066	36.75	no cnx
2018_06_18_exp2_AB	1	pyramidal	2	230	25.57	TSeries_636_1	596.572	-219.97	38.7	no cnx
2018_06_18_exp2_AB	1	pyramidal	2	230	25.57	TSeries_151_6	363.416	-43.9176	58.83	no cnx
2018_06_18_exp2_AB	1	pyramidal	2	230	25.57	TSeries_151_1	509.254	3.9346	58.83	no cnx
2018_06_18_exp2_AB	1	pyramidal	2	230	25.57	TSeries_151_3	462.922	131.957	58.83	no cnx
2018_06_18_exp2_AB	1	pyramidal	2	230	25.57	TSeries_151_2	457.642	87.378	58.83	no cnx
2018_06_18_exp2_AB	1	pyramidal	2	230	25.57	TSeries_596_2	509.765	-238.017	53.43	no cnx
2018_06_18_exp2_AB	1	pyramidal	2	230	25.57	TSeries_596_1	624.818	-266.631	53.43	no cnx
2018_06_18_exp2_AB	1	pyramidal	2	230	25.57	TSeries_716_1	362.442	266.749	118.35	no cnx
[truncated: 308 more rows]

## Sheet: Fig4B_connection_prob
RorbAi_L23pyr_bins	50	150	250	350	450	550	650	750	850	950	1050
RorbAi_L23pyr_midX	100	200	300	400	500	600	700	800	900	1000
RorbAi_L23pyr_probed_hist	6	24	290	745	408	248	137	100	44	22
RorbAi_L23pyr_exc_hist	0	0	16	80	40	13	3	2	0	0
RorbAi_L23pyr_exc_frac	0	0	0.0551724	0.107383	0.0980392	0.0524194	0.0218978	0.02	0	0
RorbAi_L23pyr_exc_ci_low	7.84998e-05	2.02476e-05	0.033185	0.0866773	0.0720243	0.0296974	0.00620505	0.00417881	1.10966e-05	2.20673e-05
RorbAi_L23pyr_exc_ci_high	0.330389	0.0983876	0.085968	0.131131	0.12973	0.0854891	0.0572772	0.0626058	0.0551836	0.10674
RorbKv_L23pyr_bins	50	150	250	350	450	550	650	750	850	950	1050
RorbKv_L23pyr_midX	100	200	300	400	500	600	700	800	900	1000
RorbKv_L23pyr_probed_hist	0	20	136	346	332	138	23	0	0	0
RorbKv_L23pyr_exc_hist	0	2	10	28	34	10	1	0	0	0
RorbKv_L23pyr_exc_frac	nan	0.1	0.0735294	0.0809249	0.10241	0.0724638	0.0434783	nan	nan	nan
RorbKv_L23pyr_exc_ci_low	0.00154133	0.0213725	0.03843	0.0556467	0.0732518	0.0378638	0.00473202	0.00154133	0.00154133	0.00154133
RorbKv_L23pyr_exc_ci_high	0.998459	0.283853	0.126501	0.113173	0.138459	0.124724	0.185775	0.998459	0.998459	0.998459
