# Supplementary material for: Synaptic connectivity to L2/3 of primary visual cortex measured by two-photon optogenetic stimulation
Source: eLife. 2022 Jan 21;11:e71103. doi: 10.7554/eLife.71103 (PMC8824465; doi:10.7554/eLife.71103)
Supplement: Figure 5—source data 1. [file elife-71103-fig5-data1.xlsx]

## Sheet: Fig5B_Tlx3_L23pyr_map
exp_id	headstage	post_class	post_layer	postPia	post_z	MP_ID	prePia	x_ap	pre_z	cnx
2020_10_23_exp2_TH	0	pyramidal	2	126	586.884	Point 5	448.104	158.086	570.664	no cnx
2020_10_23_exp2_TH	0	pyramidal	2	126	586.884	Point 4	455.478	84.3262	570.664	no cnx
2020_10_23_exp2_TH	0	pyramidal	2	126	586.884	Point 7	588.86	-32.8878	566.214	no cnx
2020_10_23_exp2_TH	0	pyramidal	2	126	586.884	Point 6	477.903	20.838	566.214	no cnx
2020_10_23_exp2_TH	0	pyramidal	2	126	586.884	Point 1	426.919	-25.4594	570.654	no cnx
2020_10_23_exp2_TH	0	pyramidal	2	126	586.884	Point 3	462.771	7.05789	570.654	no cnx
2020_10_23_exp2_TH	0	pyramidal	2	126	586.884	Point 2	437.188	10.3721	570.654	no cnx
2020_10_23_exp2_TH	0	pyramidal	2	126	586.884	Point 9	586.582	13.2327	566.214	no cnx
2020_10_23_exp2_TH	0	pyramidal	2	126	586.884	Point 8	541.078	46.8709	566.214	no cnx
2020_10_23_exp2_TH	0	pyramidal	2	126	586.884	Point 11	598.275	78.2963	566.214	no cnx
2020_10_23_exp2_TH	0	pyramidal	2	126	586.884	Point 10	619.764	18.3044	566.214	no cnx
2020_10_23_exp2_TH	0	pyramidal	2	126	586.884	Point 13	536.1	141.687	559.724	no cnx
2020_10_23_exp2_TH	0	pyramidal	2	126	586.884	Point 12	433.861	96.2539	565.484	excitatory
2020_10_23_exp2_TH	0	pyramidal	2	126	586.884	Point 15	532.614	45.4291	559.724	no cnx
2020_10_23_exp2_TH	0	pyramidal	2	126	586.884	Point 14	464.228	79.2661	559.724	no cnx
2020_10_23_exp2_TH	0	pyramidal	2	126	586.884	Point 17	439.289	108.991	565.484	no cnx
2020_10_23_exp2_TH	0	pyramidal	2	126	586.884	Point 16	599.949	93.8349	559.724	no cnx
2020_10_23_exp2_TH	0	pyramidal	2	126	586.884	Point 19	438.455	98.4817	556.444	no cnx
2020_10_23_exp2_TH	0	pyramidal	2	126	586.884	Point 18	434.711	86.6589	558.634	excitatory
2020_10_23_exp2_TH	0	pyramidal	2	126	586.884	Point 20	438.781	119.453	556.444	no cnx
2020_07_09_exp3_TH	1	pyramidal	2	198	257.034	Point 11	521.45	112.68	260.494	no cnx
2020_07_09_exp3_TH	1	pyramidal	2	198	257.034	Point 10	571.366	139.753	265.484	no cnx
2020_07_09_exp3_TH	1	pyramidal	2	198	257.034	Point 13	559.042	-52.6377	260.494	no cnx
2020_07_09_exp3_TH	1	pyramidal	2	198	257.034	Point 12	556.648	-75.9154	260.494	no cnx
2020_07_09_exp3_TH	1	pyramidal	2	198	257.034	Point 15	464.916	11.1214	249.274	no cnx
2020_07_09_exp3_TH	1	pyramidal	2	198	257.034	Point 14	530.383	-86.5051	260.494	no cnx
2020_07_09_exp3_TH	1	pyramidal	2	198	257.034	Point 17	409.998	140.347	249.274	no cnx
2020_07_09_exp3_TH	1	pyramidal	2	198	257.034	Point 16	494.107	136.596	249.274	no cnx
2020_07_09_exp3_TH	1	pyramidal	2	198	257.034	Point 19	408.052	192.336	240.964	no cnx
2020_07_09_exp3_TH	1	pyramidal	2	198	257.034	Point 18	452.78	39.1016	249.274	no cnx
2020_07_09_exp3_TH	1	pyramidal	2	198	257.034	Point 31	577.179	240.271	200.614	no cnx
2020_07_09_exp3_TH	1	pyramidal	2	198	257.034	Point 30	521.406	269.985	200.614	no cnx
2020_07_09_exp3_TH	1	pyramidal	2	198	257.034	Point 37	424.138	226.118	195.124	no cnx
2020_07_09_exp3_TH	1	pyramidal	2	198	257.034	Point 36	439.277	219.13	202.234	excitatory
2020_07_09_exp3_TH	1	pyramidal	2	198	257.034	Point 35	462.598	289.527	200.614	no cnx
2020_07_09_exp3_TH	1	pyramidal	2	198	257.034	Point 34	454.694	272.237	200.614	no cnx
2020_07_09_exp3_TH	1	pyramidal	2	198	257.034	Point 5	504.727	22.3592	270.114	no cnx
2020_07_09_exp3_TH	1	pyramidal	2	198	257.034	Point 4	475.327	-0.811846	270.114	no cnx
2020_07_09_exp3_TH	1	pyramidal	2	198	257.034	Point 7	545.821	106.118	265.464	no cnx
2020_07_09_exp3_TH	1	pyramidal	2	198	257.034	Point 6	452.921	91.5483	265.464	no cnx
2020_07_09_exp3_TH	1	pyramidal	2	198	257.034	Point 1	414.985	58.7714	270.114	no cnx
2020_07_09_exp3_TH	1	pyramidal	2	198	257.034	Point 3	454.404	113.057	270.114	no cnx
2020_07_09_exp3_TH	1	pyramidal	2	198	257.034	Point 2	476.789	-8.50052	270.114	no cnx
2020_07_09_exp3_TH	1	pyramidal	2	198	257.034	Point 9	548.849	83.0098	265.484	no cnx
2020_07_09_exp3_TH	1	pyramidal	2	198	257.034	Point 8	474.289	-32.2118	265.484	no cnx
2020_07_09_exp3_TH	1	pyramidal	2	198	257.034	Point 32	423.534	282.153	200.614	no cnx
2020_07_09_exp3_TH	1	pyramidal	2	198	257.034	Point 40	536.201	297.065	210.784	no cnx
2020_07_09_exp3_TH	1	pyramidal	2	198	257.034	Point 41	463.826	301.264	210.784	no cnx
2020_07_09_exp3_TH	1	pyramidal	2	198	257.034	Point 28	429.385	143.649	234.144	no cnx
2020_07_09_exp3_TH	1	pyramidal	2	198	257.034	Point 29	427.404	255.052	200.614	no cnx
2020_07_09_exp3_TH	1	pyramidal	2	198	257.034	Point 20	443.455	111.262	240.964	no cnx
2020_07_09_exp3_TH	1	pyramidal	2	198	257.034	Point 21	490.66	26.5395	240.964	no cnx
2020_07_09_exp3_TH	1	pyramidal	2	198	257.034	Point 22	522.531	46.8924	240.964	no cnx
2020_07_09_exp3_TH	1	pyramidal	2	198	257.034	Point 23	583.25	79.1032	240.964	no cnx
2020_07_09_exp3_TH	1	pyramidal	2	198	257.034	Point 24	505.528	70.5913	240.964	no cnx
2020_07_09_exp3_TH	1	pyramidal	2	198	257.034	Point 25	436.042	-64.3572	240.964	no cnx
2020_07_09_exp3_TH	1	pyramidal	2	198	257.034	Point 26	497.125	94.3239	240.964	no cnx
2020_07_09_exp3_TH	1	pyramidal	2	198	257.034	Point 27	385.021	185.716	234.144	no cnx
2020_07_09_exp3_TH	1	pyramidal	2	198	257.034	Point 39	500.826	247.304	210.784	no cnx
2020_07_09_exp3_TH	1	pyramidal	2	198	257.034	Point 33	435.981	229.006	200.614	excitatory
2020_07_09_exp3_TH	1	pyramidal	2	198	257.034	Point 38	444.841	226.605	190.544	excitatory
2020_07_09_exp3_TH	0	pyramidal	2	209	291.684	Point 11	524.539	223.5	260.494	no cnx
2020_07_09_exp3_TH	0	pyramidal	2	209	291.684	Point 10	574.454	250.573	265.484	no cnx
2020_07_09_exp3_TH	0	pyramidal	2	209	291.684	Point 13	562.13	58.1831	260.494	no cnx
2020_07_09_exp3_TH	0	pyramidal	2	209	291.684	Point 12	559.736	34.9054	260.494	no cnx
2020_07_09_exp3_TH	0	pyramidal	2	209	291.684	Point 15	468.005	121.942	249.274	no cnx
2020_07_09_exp3_TH	0	pyramidal	2	209	291.684	Point 14	533.472	24.3157	260.494	no cnx
2020_07_09_exp3_TH	0	pyramidal	2	209	291.684	Point 17	413.086	251.168	249.274	no cnx
2020_07_09_exp3_TH	0	pyramidal	2	209	291.684	Point 16	497.195	247.417	249.274	no cnx
2020_07_09_exp3_TH	0	pyramidal	2	209	291.684	Point 19	411.141	303.157	240.964	no cnx
2020_07_09_exp3_TH	0	pyramidal	2	209	291.684	Point 18	455.869	149.922	249.274	no cnx
2020_07_09_exp3_TH	0	pyramidal	2	209	291.684	Point 31	580.268	351.092	200.614	no cnx
2020_07_09_exp3_TH	0	pyramidal	2	209	291.684	Point 30	524.494	380.806	200.614	no cnx
2020_07_09_exp3_TH	0	pyramidal	2	209	291.684	Point 37	427.226	336.939	195.124	no cnx
2020_07_09_exp3_TH	0	pyramidal	2	209	291.684	Point 36	442.366	329.951	202.234	no cnx
2020_07_09_exp3_TH	0	pyramidal	2	209	291.684	Point 35	465.686	400.348	200.614	no cnx
2020_07_09_exp3_TH	0	pyramidal	2	209	291.684	Point 34	457.782	383.058	200.614	no cnx
2020_07_09_exp3_TH	0	pyramidal	2	209	291.684	Point 5	507.816	133.18	270.114	no cnx
2020_07_09_exp3_TH	0	pyramidal	2	209	291.684	Point 4	478.416	110.009	270.114	no cnx
2020_07_09_exp3_TH	0	pyramidal	2	209	291.684	Point 7	548.909	216.939	265.464	no cnx
2020_07_09_exp3_TH	0	pyramidal	2	209	291.684	Point 6	456.01	202.369	265.464	no cnx
2020_07_09_exp3_TH	0	pyramidal	2	209	291.684	Point 1	418.073	169.592	270.114	no cnx
2020_07_09_exp3_TH	0	pyramidal	2	209	291.684	Point 3	457.492	223.878	270.114	no cnx
2020_07_09_exp3_TH	0	pyramidal	2	209	291.684	Point 2	479.877	102.32	270.114	no cnx
2020_07_09_exp3_TH	0	pyramidal	2	209	291.684	Point 9	551.937	193.831	265.484	no cnx
2020_07_09_exp3_TH	0	pyramidal	2	209	291.684	Point 8	477.378	78.609	265.484	no cnx
2020_07_09_exp3_TH	0	pyramidal	2	209	291.684	Point 32	426.622	392.974	200.614	no cnx
2020_07_09_exp3_TH	0	pyramidal	2	209	291.684	Point 40	539.289	407.886	210.784	no cnx
2020_07_09_exp3_TH	0	pyramidal	2	209	291.684	Point 41	466.915	412.084	210.784	no cnx
2020_07_09_exp3_TH	0	pyramidal	2	209	291.684	Point 28	432.473	254.469	234.144	no cnx
2020_07_09_exp3_TH	0	pyramidal	2	209	291.684	Point 29	430.493	365.873	200.614	no cnx
2020_07_09_exp3_TH	0	pyramidal	2	209	291.684	Point 20	446.544	222.083	240.964	no cnx
2020_07_09_exp3_TH	0	pyramidal	2	209	291.684	Point 21	493.748	137.36	240.964	no cnx
2020_07_09_exp3_TH	0	pyramidal	2	209	291.684	Point 22	525.619	157.713	240.964	no cnx
2020_07_09_exp3_TH	0	pyramidal	2	209	291.684	Point 23	586.339	189.924	240.964	no cnx
2020_07_09_exp3_TH	0	pyramidal	2	209	291.684	Point 24	508.616	181.412	240.964	no cnx
2020_07_09_exp3_TH	0	pyramidal	2	209	291.684	Point 25	439.131	46.4636	240.964	no cnx
2020_07_09_exp3_TH	0	pyramidal	2	209	291.684	Point 26	500.213	205.145	240.964	no cnx
2020_07_09_exp3_TH	0	pyramidal	2	209	291.684	Point 27	388.11	296.537	234.144	no cnx
2020_07_09_exp3_TH	0	pyramidal	2	209	291.684	Point 39	503.914	358.125	210.784	no cnx
2020_07_09_exp3_TH	0	pyramidal	2	209	291.684	Point 33	439.069	339.827	200.614	no cnx
2020_07_09_exp3_TH	0	pyramidal	2	209	291.684	Point 38	447.929	337.426	190.544	no cnx
2020_07_09_exp2_TH	1	pyramidal	2	164	202	Point 5	389.44	231.649	197.044	no cnx
2020_07_09_exp2_TH	1	pyramidal	2	164	202	Point 4	507.742	177.984	197.044	no cnx
2020_07_09_exp2_TH	1	pyramidal	2	164	202	Point 7	534.334	236.359	197.044	no cnx
2020_07_09_exp2_TH	1	pyramidal	2	164	202	Point 6	465.265	307.108	197.044	no cnx
2020_07_09_exp2_TH	1	pyramidal	2	164	202	Point 1	368.11	231.384	197.044	no cnx
2020_07_09_exp2_TH	1	pyramidal	2	164	202	Point 3	409.709	251.493	197.044	no cnx
2020_07_09_exp2_TH	1	pyramidal	2	164	202	Point 2	449.294	190.3	197.044	no cnx
2020_07_09_exp2_TH	1	pyramidal	2	164	202	Point 9	441.851	181.568	190.724	no cnx
2020_07_09_exp2_TH	1	pyramidal	2	164	202	Point 8	406.045	134.824	190.724	excitatory
2020_07_09_exp2_TH	1	pyramidal	2	164	202	Point 11	416.382	313.149	190.724	no cnx
2020_07_09_exp2_TH	1	pyramidal	2	164	202	Point 10	444.372	211.433	190.724	no cnx
2020_07_09_exp2_TH	1	pyramidal	2	164	202	Point 13	415.904	297.987	190.724	no cnx
2020_07_09_exp2_TH	1	pyramidal	2	164	202	Point 12	363.444	273.694	190.724	no cnx
2020_07_09_exp2_TH	1	pyramidal	2	164	202	Point 15	523.231	196.25	190.724	no cnx
2020_07_09_exp2_TH	1	pyramidal	2	164	202	Point 17	399.533	125.109	192.594	excitatory
2020_07_09_exp2_TH	1	pyramidal	2	164	202	Point 16	353.944	325.571	190.724	no cnx
2020_07_09_exp2_TH	1	pyramidal	2	164	202	Point 19	375.804	171.473	205.219	no cnx
2020_07_09_exp2_TH	1	pyramidal	2	164	202	Point 18	416.26	149.182	205.284	no cnx
2020_07_09_exp2_TH	1	pyramidal	2	164	202	Point 20	404.114	153.037	205.284	no cnx
2020_07_09_exp2_TH	1	pyramidal	2	164	202	Point 22	357.113	136.714	205.219	no cnx
2020_07_09_exp2_TH	0	pyramidal	2	215	202	Point 5	388.767	302.051	197.044	no cnx
2020_07_09_exp2_TH	0	pyramidal	2	215	202	Point 4	507.069	248.386	197.044	no cnx
2020_07_09_exp2_TH	0	pyramidal	2	215	202	Point 7	533.661	306.761	197.044	no cnx
2020_07_09_exp2_TH	0	pyramidal	2	215	202	Point 6	464.593	377.51	197.044	no cnx
2020_07_09_exp2_TH	0	pyramidal	2	215	202	Point 1	367.437	301.786	197.044	no cnx
2020_07_09_exp2_TH	0	pyramidal	2	215	202	Point 3	409.037	321.896	197.044	no cnx
2020_07_09_exp2_TH	0	pyramidal	2	215	202	Point 2	448.622	260.702	197.044	no cnx
2020_07_09_exp2_TH	0	pyramidal	2	215	202	Point 21	368.706	219.956	205.219	no cnx
2020_07_09_exp2_TH	0	pyramidal	2	215	202	Point 9	441.178	251.97	190.724	no cnx
2020_07_09_exp2_TH	0	pyramidal	2	215	202	Point 8	405.373	205.226	190.724	no cnx
2020_07_09_exp2_TH	0	pyramidal	2	215	202	Point 11	415.709	383.551	190.724	no cnx
2020_07_09_exp2_TH	0	pyramidal	2	215	202	Point 10	443.699	281.835	190.724	no cnx
2020_07_09_exp2_TH	0	pyramidal	2	215	202	Point 13	415.232	368.389	190.724	no cnx
2020_07_09_exp2_TH	0	pyramidal	2	215	202	Point 12	362.772	344.096	190.724	no cnx
2020_07_09_exp2_TH	0	pyramidal	2	215	202	Point 15	522.558	266.652	190.724	no cnx
2020_07_09_exp2_TH	0	pyramidal	2	215	202	Point 17	398.86	195.511	192.594	no cnx
2020_07_09_exp2_TH	0	pyramidal	2	215	202	Point 16	353.272	395.974	190.724	no cnx
2020_07_09_exp2_TH	0	pyramidal	2	215	202	Point 19	375.131	241.875	205.219	no cnx
2020_07_09_exp2_TH	0	pyramidal	2	215	202	Point 18	415.588	219.584	205.284	excitatory
2020_07_09_exp2_TH	0	pyramidal	2	215	202	Point 20	403.442	223.439	205.284	excitatory
2020_07_09_exp2_TH	0	pyramidal	2	215	202	Point 22	356.441	207.116	205.219	no cnx
2020_07_09_exp1_TH	1	pyramidal	2	210	177.734	Point 11	443.004	144.611	179.794	no cnx
2020_07_09_exp1_TH	1	pyramidal	2	210	177.734	Point 10	490.678	113.706	179.794	no cnx
2020_07_09_exp1_TH	1	pyramidal	2	210	177.734	Point 13	357.929	103.542	189.024	no cnx
2020_07_09_exp1_TH	1	pyramidal	2	210	177.734	Point 12	415.852	-108.888	179.794	no cnx
2020_07_09_exp1_TH	1	pyramidal	2	210	177.734	Point 15	385.727	110.723	189.024	no cnx
2020_07_09_exp1_TH	1	pyramidal	2	210	177.734	Point 14	362.085	134.148	189.024	no cnx
2020_07_09_exp1_TH	1	pyramidal	2	210	177.734	Point 17	311.906	94.9923	195.994	no cnx
2020_07_09_exp1_TH	1	pyramidal	2	210	177.734	Point 16	379.802	140.883	189.024	no cnx
2020_07_09_exp1_TH	1	pyramidal	2	210	177.734	Point 19	365.748	87.0636	195.994	no cnx
2020_07_09_exp1_TH	1	pyramidal	2	210	177.734	Point 18	345.397	110.505	195.994	no cnx
2020_07_09_exp1_TH	1	pyramidal	2	210	177.734	Point 30	340.89	42.3358	152.119	excitatory
2020_07_09_exp1_TH	1	pyramidal	2	210	177.734	Point 5	366.85	-0.914568	179.294	no cnx
2020_07_09_exp1_TH	1	pyramidal	2	210	177.734	Point 4	429.629	83.9324	179.294	no cnx
2020_07_09_exp1_TH	1	pyramidal	2	210	177.734	Point 7	461.41	-36.7964	179.794	no cnx
2020_07_09_exp1_TH	1	pyramidal	2	210	177.734	Point 6	393.591	75.5756	179.294	no cnx
2020_07_09_exp1_TH	1	pyramidal	2	210	177.734	Point 1	322.92	7.83424	179.294	no cnx
2020_07_09_exp1_TH	1	pyramidal	2	210	177.734	Point 3	393.907	7.80134	179.294	no cnx
2020_07_09_exp1_TH	1	pyramidal	2	210	177.734	Point 2	381.477	68.7668	179.294	no cnx
2020_07_09_exp1_TH	1	pyramidal	2	210	177.734	Point 9	339.342	80.5764	165.604	excitatory
2020_07_09_exp1_TH	1	pyramidal	2	210	177.734	Point 8	398.228	-3.70738	179.794	no cnx
2020_07_09_exp1_TH	1	pyramidal	2	210	177.734	Point 28	343.306	102.953	158.424	no cnx
2020_07_09_exp1_TH	1	pyramidal	2	210	177.734	Point 29	351.903	91.56	158.424	no cnx
2020_07_09_exp1_TH	1	pyramidal	2	210	177.734	Point 20	373.337	119.378	195.994	no cnx
2020_07_09_exp1_TH	1	pyramidal	2	210	177.734	Point 21	383.455	51.5269	168.334	no cnx
2020_07_09_exp1_TH	1	pyramidal	2	210	177.734	Point 22	386.591	112.428	168.334	no cnx
2020_07_09_exp1_TH	1	pyramidal	2	210	177.734	Point 23	357.059	156.014	168.334	no cnx
2020_07_09_exp1_TH	1	pyramidal	2	210	177.734	Point 24	405.001	72.545	168.334	no cnx
2020_07_09_exp1_TH	1	pyramidal	2	210	177.734	Point 25	406.478	112.735	168.334	no cnx
2020_07_09_exp1_TH	1	pyramidal	2	210	177.734	Point 26	345.446	34.4678	195.454	no cnx
2020_07_09_exp1_TH	1	pyramidal	2	210	177.734	Point 27	379.178	78.5447	195.454	no cnx
2020_07_03_exp5_TH	1	pyramidal	2	140	284.154	Point 11	399.975	-18.1545	317.964	no cnx
2020_07_03_exp5_TH	1	pyramidal	2	140	284.154	Point 10	451.797	49.3521	317.964	no cnx
2020_07_03_exp5_TH	1	pyramidal	2	140	284.154	Point 13	451.919	76.0524	317.964	no cnx
2020_07_03_exp5_TH	1	pyramidal	2	140	284.154	Point 12	484.302	29.4938	317.964	no cnx
2020_07_03_exp5_TH	1	pyramidal	2	140	284.154	Point 15	432.487	223.712	317.964	no cnx
2020_07_03_exp5_TH	1	pyramidal	2	140	284.154	Point 14	462.913	104.045	317.964	no cnx
2020_07_03_exp5_TH	1	pyramidal	2	140	284.154	Point 17	414.985	300.825	358.964	no cnx
2020_07_03_exp5_TH	1	pyramidal	2	140	284.154	Point 16	457.685	183.718	317.964	no cnx
2020_07_03_exp5_TH	1	pyramidal	2	140	284.154	Point 19	413.605	193.99	358.964	no cnx
2020_07_03_exp5_TH	1	pyramidal	2	140	284.154	Point 18	453.066	236.281	358.964	no cnx
2020_07_03_exp5_TH	1	pyramidal	2	140	284.154	Point 31	512.827	299.861	361.544	no cnx
2020_07_03_exp5_TH	1	pyramidal	2	140	284.154	Point 30	441.608	374.391	361.544	no cnx
2020_07_03_exp5_TH	1	pyramidal	2	140	284.154	Point 37	427.342	-61.8317	401.844	no cnx
2020_07_03_exp5_TH	1	pyramidal	2	140	284.154	Point 36	466.646	-79.9783	401.844	no cnx
2020_07_03_exp5_TH	1	pyramidal	2	140	284.154	Point 35	449.003	-75.2716	410.604	no cnx
2020_07_03_exp5_TH	1	pyramidal	2	140	284.154	Point 34	365.905	-259.964	410.604	no cnx
2020_07_03_exp5_TH	1	pyramidal	2	140	284.154	Point 5	474.163	132.482	322.074	no cnx
2020_07_03_exp5_TH	1	pyramidal	2	140	284.154	Point 4	482.728	66.9289	322.074	no cnx
2020_07_03_exp5_TH	1	pyramidal	2	140	284.154	Point 7	481.817	151.444	322.074	no cnx
2020_07_03_exp5_TH	1	pyramidal	2	140	284.154	Point 6	453.964	146.437	322.074	no cnx
2020_07_03_exp5_TH	1	pyramidal	2	140	284.154	Point 1	422.748	27.2593	322.074	no cnx
2020_07_03_exp5_TH	1	pyramidal	2	140	284.154	Point 3	444.809	187.793	322.074	no cnx
2020_07_03_exp5_TH	1	pyramidal	2	140	284.154	Point 2	424.599	72.6038	322.074	no cnx
2020_07_03_exp5_TH	1	pyramidal	2	140	284.154	Point 9	434.222	106.86	317.964	no cnx
2020_07_03_exp5_TH	1	pyramidal	2	140	284.154	Point 8	397.077	19.4705	322.074	no cnx
2020_07_03_exp5_TH	1	pyramidal	2	140	284.154	Point 32	370.657	-104.383	410.604	no cnx
2020_07_03_exp5_TH	1	pyramidal	2	140	284.154	Point 40	361.773	-195.586	401.844	no cnx
2020_07_03_exp5_TH	1	pyramidal	2	140	284.154	Point 41	438.938	-44.4255	401.844	no cnx
2020_07_03_exp5_TH	1	pyramidal	2	140	284.154	Point 28	427.319	164.639	361.544	no cnx
2020_07_03_exp5_TH	1	pyramidal	2	140	284.154	Point 29	458.529	348.398	361.544	no cnx
2020_07_03_exp5_TH	1	pyramidal	2	140	284.154	Point 20	381.039	296.632	358.964	no cnx
2020_07_03_exp5_TH	1	pyramidal	2	140	284.154	Point 21	467.814	307.602	358.964	no cnx
2020_07_03_exp5_TH	1	pyramidal	2	140	284.154	Point 22	447.807	254.082	358.964	no cnx
2020_07_03_exp5_TH	1	pyramidal	2	140	284.154	Point 23	442.5	278.013	358.964	no cnx
2020_07_03_exp5_TH	1	pyramidal	2	140	284.154	Point 24	487.447	368.524	358.964	no cnx
2020_07_03_exp5_TH	1	pyramidal	2	140	284.154	Point 25	467.344	362.93	361.544	no cnx
2020_07_03_exp5_TH	1	pyramidal	2	140	284.154	Point 26	418.673	286.703	361.544	no cnx
2020_07_03_exp5_TH	1	pyramidal	2	140	284.154	Point 27	450.602	222.823	361.544	no cnx
2020_07_03_exp5_TH	1	pyramidal	2	140	284.154	Point 39	370.434	-125.328	401.844	no cnx
2020_07_03_exp5_TH	1	pyramidal	2	140	284.154	Point 33	407.878	-153.501	410.604	no cnx
2020_07_03_exp5_TH	1	pyramidal	2	140	284.154	Point 38	396.469	-123.743	401.844	no cnx
2020_07_03_exp4_TH	0	pyramidal	2	203	242.784	Point 5	471.142	294.241	288.884	no cnx
2020_07_03_exp4_TH	0	pyramidal	2	203	242.784	Point 4	518.901	126.599	288.884	no cnx
2020_07_03_exp4_TH	0	pyramidal	2	203	242.784	Point 7	532.455	232.271	288.884	no cnx
2020_07_03_exp4_TH	0	pyramidal	2	203	242.784	Point 6	474.718	66.1792	288.884	no cnx
2020_07_03_exp4_TH	0	pyramidal	2	203	242.784	Point 1	414.893	200.954	288.884	no cnx
2020_07_03_exp4_TH	0	pyramidal	2	203	242.784	Point 3	382.255	161.829	288.884	no cnx
2020_07_03_exp4_TH	0	pyramidal	2	203	242.784	Point 2	439.234	317.759	288.884	no cnx
2020_07_03_exp4_TH	0	pyramidal	2	203	242.784	Point 8	606.747	284.053	288.884	no cnx
2020_05_29_exp2_TH	3	pyramidal	2	241	79.4241	Point 11	485.102	165.297	106.824	no cnx
2020_05_29_exp2_TH	3	pyramidal	2	241	79.4241	Point 10	504.574	211.682	106.824	no cnx
2020_05_29_exp2_TH	3	pyramidal	2	241	79.4241	Point 13	531.241	55.7741	106.824	no cnx
2020_05_29_exp2_TH	3	pyramidal	2	241	79.4241	Point 12	569.508	95.6278	106.824	no cnx
2020_05_29_exp2_TH	3	pyramidal	2	241	79.4241	Point 15	558.963	48.6893	106.824	no cnx
2020_05_29_exp2_TH	3	pyramidal	2	241	79.4241	Point 14	500.07	73.4922	106.824	no cnx
2020_05_29_exp2_TH	3	pyramidal	2	241	79.4241	Point 17	463.427	105.683	105.304	no cnx
2020_05_29_exp2_TH	3	pyramidal	2	241	79.4241	Point 16	447.077	67.7575	98.994	no cnx
2020_05_29_exp2_TH	3	pyramidal	2	241	79.4241	Point 19	430.251	60.3026	98.214	no cnx
2020_05_29_exp2_TH	3	pyramidal	2	241	79.4241	Point 18	464.082	44.3473	105.304	no cnx
2020_05_29_exp2_TH	3	pyramidal	2	241	79.4241	Point 5	475.599	144.27	118.244	no cnx
2020_05_29_exp2_TH	3	pyramidal	2	241	79.4241	Point 4	467.766	99.4688	118.244	no cnx
2020_05_29_exp2_TH	3	pyramidal	2	241	79.4241	Point 7	491.698	98.5712	118.244	no cnx
2020_05_29_exp2_TH	3	pyramidal	2	241	79.4241	Point 6	561.236	179.413	118.244	no cnx
2020_05_29_exp2_TH	3	pyramidal	2	241	79.4241	Point 1	498.894	166.001	118.224	no cnx
2020_05_29_exp2_TH	3	pyramidal	2	241	79.4241	Point 3	481.052	80.0991	118.224	no cnx
2020_05_29_exp2_TH	3	pyramidal	2	241	79.4241	Point 2	514.413	95.5817	118.224	no cnx
2020_05_29_exp2_TH	3	pyramidal	2	241	79.4241	Point 9	492.009	139.888	118.244	excitatory
2020_05_29_exp2_TH	3	pyramidal	2	241	79.4241	Point 8	466.66	119.849	118.244	no cnx
2020_05_29_exp2_TH	3	pyramidal	2	241	79.4241	Point 20	464.688	59.6828	98.214	no cnx
2020_05_29_exp2_TH	3	pyramidal	2	241	79.4241	Point 21	468.198	55.5513	98.994	excitatory
2020_05_29_exp2_TH	2	pyramidal	2	285	92.254	Point 11	483.859	78.3641	106.824	no cnx
2020_05_29_exp2_TH	2	pyramidal	2	285	92.254	Point 10	503.331	124.749	106.824	no cnx
2020_05_29_exp2_TH	2	pyramidal	2	285	92.254	Point 13	529.999	-31.1584	106.824	no cnx
2020_05_29_exp2_TH	2	pyramidal	2	285	92.254	Point 12	568.266	8.69531	106.824	no cnx
2020_05_29_exp2_TH	2	pyramidal	2	285	92.254	Point 15	557.721	-38.2433	106.824	no cnx
2020_05_29_exp2_TH	2	pyramidal	2	285	92.254	Point 14	498.827	-13.4403	106.824	no cnx
2020_05_29_exp2_TH	2	pyramidal	2	285	92.254	Point 17	462.185	18.7504	105.304	no cnx
2020_05_29_exp2_TH	2	pyramidal	2	285	92.254	Point 16	445.834	-19.1751	98.994	excitatory
2020_05_29_exp2_TH	2	pyramidal	2	285	92.254	Point 19	429.008	-26.6299	98.214	no cnx
2020_05_29_exp2_TH	2	pyramidal	2	285	92.254	Point 18	462.84	-42.5852	105.304	no cnx
2020_05_29_exp2_TH	2	pyramidal	2	285	92.254	Point 31	508.152	-27.3083	108.564	no cnx
2020_05_29_exp2_TH	2	pyramidal	2	285	92.254	Point 30	463.959	-67.8882	108.564	no cnx
2020_05_29_exp2_TH	2	pyramidal	2	285	92.254	Point 5	474.357	57.3379	118.244	no cnx
2020_05_29_exp2_TH	2	pyramidal	2	285	92.254	Point 4	466.523	12.5363	118.244	no cnx
2020_05_29_exp2_TH	2	pyramidal	2	285	92.254	Point 7	490.456	11.6387	118.244	no cnx
2020_05_29_exp2_TH	2	pyramidal	2	285	92.254	Point 6	559.993	92.4809	118.244	no cnx
2020_05_29_exp2_TH	2	pyramidal	2	285	92.254	Point 1	497.652	79.0684	118.224	no cnx
2020_05_29_exp2_TH	2	pyramidal	2	285	92.254	Point 3	479.809	-6.83339	118.224	no cnx
2020_05_29_exp2_TH	2	pyramidal	2	285	92.254	Point 2	513.17	8.64915	118.224	no cnx
2020_05_29_exp2_TH	2	pyramidal	2	285	92.254	Point 9	490.766	52.9557	118.244	no cnx
2020_05_29_exp2_TH	2	pyramidal	2	285	92.254	Point 8	465.418	32.9163	118.244	no cnx
2020_05_29_exp2_TH	2	pyramidal	2	285	92.254	Point 28	542.788	-204.052	108.564	no cnx
2020_05_29_exp2_TH	2	pyramidal	2	285	92.254	Point 29	468.577	-161.785	108.564	no cnx
2020_05_29_exp2_TH	2	pyramidal	2	285	92.254	Point 21	466.956	-31.3813	98.994	no cnx
2020_05_29_exp2_TH	2	pyramidal	2	285	92.254	Point 23	508.481	-74.1781	106.614	no cnx
2020_05_29_exp2_TH	2	pyramidal	2	285	92.254	Point 24	505.551	-94.4529	106.614	no cnx
2020_05_29_exp2_TH	2	pyramidal	2	285	92.254	Point 25	524.412	-158.935	106.614	no cnx
2020_05_29_exp2_TH	2	pyramidal	2	285	92.254	Point 26	473.063	-139.248	106.614	no cnx
2020_05_29_exp2_TH	2	pyramidal	2	285	92.254	Point 27	498.974	-184.789	108.564	no cnx
2020_05_29_exp1_TH	3	pyramidal	2	184	128.954	Point 11	518.891	10.0362	193.944	no cnx
2020_05_29_exp1_TH	3	pyramidal	2	184	128.954	Point 10	541.28	84.9822	162.134	no cnx
2020_05_29_exp1_TH	3	pyramidal	2	184	128.954	Point 13	474.203	-49.1768	193.944	no cnx
2020_05_29_exp1_TH	3	pyramidal	2	184	128.954	Point 12	520.943	-31.5726	193.944	excitatory
2020_05_29_exp1_TH	3	pyramidal	2	184	128.954	Point 15	450.438	-100.773	193.944	no cnx
2020_05_29_exp1_TH	3	pyramidal	2	184	128.954	Point 14	413.551	-19.6371	193.944	no cnx
2020_05_29_exp1_TH	3	pyramidal	2	184	128.954	Point 17	389.921	-39.5118	193.944	no cnx
2020_05_29_exp1_TH	3	pyramidal	2	184	128.954	Point 16	415.452	-89.387	193.944	no cnx
2020_05_29_exp1_TH	3	pyramidal	2	184	128.954	Point 19	376.528	-69.0791	193.944	excitatory
2020_05_29_exp1_TH	3	pyramidal	2	184	128.954	Point 18	376.434	-47.5979	193.944	no cnx
2020_05_29_exp1_TH	3	pyramidal	2	184	128.954	Point 5	460.235	-88.1335	175.114	no cnx
2020_05_29_exp1_TH	3	pyramidal	2	184	128.954	Point 4	434.264	101.507	175.114	no cnx
2020_05_29_exp1_TH	3	pyramidal	2	184	128.954	Point 7	511.043	105.511	162.134	excitatory
2020_05_29_exp1_TH	3	pyramidal	2	184	128.954	Point 6	527.679	105.392	175.114	excitatory
2020_05_29_exp1_TH	3	pyramidal	2	184	128.954	Point 1	469.375	126.935	175.114	no cnx
2020_05_29_exp1_TH	3	pyramidal	2	184	128.954	Point 3	425.677	-19.1479	175.114	no cnx
2020_05_29_exp1_TH	3	pyramidal	2	184	128.954	Point 2	452.821	80.4875	175.114	no cnx
2020_05_29_exp1_TH	3	pyramidal	2	184	128.954	Point 9	506.297	64.3965	162.134	no cnx
2020_05_29_exp1_TH	3	pyramidal	2	184	128.954	Point 8	534.159	96.7181	162.134	no cnx
2020_05_29_exp1_TH	3	pyramidal	2	184	128.954	Point 20	488.004	-15.8449	191.064	no cnx
2020_05_29_exp1_TH	3	pyramidal	2	184	128.954	Point 21	541.837	-43.1822	195.144	excitatory
2020_05_29_exp1_TH	3	pyramidal	2	184	128.954	Point 22	548.587	5.68944	191.064	no cnx
2020_05_29_exp1_TH	3	pyramidal	2	184	128.954	Point 23	543.114	21.9934	191.064	excitatory
2020_05_29_exp1_TH	3	pyramidal	2	184	128.954	Point 24	560.233	-18.6287	188.924	excitatory
2020_05_29_exp1_TH	3	pyramidal	2	184	128.954	Point 25	593.904	-47.0552	188.924	no cnx
2020_05_29_exp1_TH	3	pyramidal	2	184	128.954	Point 26	466.323	1.1861	188.924	no cnx
2020_05_29_exp1_TH	3	pyramidal	2	184	128.954	Point 27	555.928	-56.1609	200.944	excitatory
2019_08_26_exp2_TH	3	pyramidal	2	216	101.186	Point 51	455.196	174.171	68.416	no cnx
2019_08_26_exp2_TH	3	pyramidal	2	216	101.186	Point 50	489.283	174.241	68.416	no cnx
2019_08_26_exp2_TH	3	pyramidal	2	216	101.186	Point 11	474.635	125.623	86.686	no cnx
2019_08_26_exp2_TH	3	pyramidal	2	216	101.186	Point 10	525.683	81.4759	90.856	no cnx
2019_08_26_exp2_TH	3	pyramidal	2	216	101.186	Point 13	545.715	295.567	86.686	excitatory
2019_08_26_exp2_TH	3	pyramidal	2	216	101.186	Point 12	505.021	258.2	86.686	no cnx
2019_08_26_exp2_TH	3	pyramidal	2	216	101.186	Point 15	475.009	35.1808	86.686	no cnx
2019_08_26_exp2_TH	3	pyramidal	2	216	101.186	Point 14	618.051	225.866	86.686	no cnx
2019_08_26_exp2_TH	3	pyramidal	2	216	101.186	Point 17	444.114	68.7056	86.686	no cnx
2019_08_26_exp2_TH	3	pyramidal	2	216	101.186	Point 16	550.746	245.071	86.686	no cnx
2019_08_26_exp2_TH	3	pyramidal	2	216	101.186	Point 19	489.55	273.031	86.686	no cnx
2019_08_26_exp2_TH	3	pyramidal	2	216	101.186	Point 18	516.151	286.43	86.686	no cnx
2019_08_26_exp2_TH	3	pyramidal	2	216	101.186	Point 31	480.672	365.75	80.996	no cnx
2019_08_26_exp2_TH	3	pyramidal	2	216	101.186	Point 30	457.329	227.813	80.996	no cnx
2019_08_26_exp2_TH	3	pyramidal	2	216	101.186	Point 37	498.62	231.628	80.996	no cnx
2019_08_26_exp2_TH	3	pyramidal	2	216	101.186	Point 36	494.763	442.093	80.996	no cnx
2019_08_26_exp2_TH	3	pyramidal	2	216	101.186	Point 35	497.84	251.719	80.996	no cnx
2019_08_26_exp2_TH	3	pyramidal	2	216	101.186	Point 34	482.565	346.76	80.996	no cnx
2019_08_26_exp2_TH	3	pyramidal	2	216	101.186	Point 5	528.139	51.3217	90.856	no cnx
2019_08_26_exp2_TH	3	pyramidal	2	216	101.186	Point 4	551.195	153.251	90.856	no cnx
2019_08_26_exp2_TH	3	pyramidal	2	216	101.186	Point 7	481.711	28.43	90.856	no cnx
2019_08_26_exp2_TH	3	pyramidal	2	216	101.186	Point 6	500.485	112.221	90.856	no cnx
2019_08_26_exp2_TH	3	pyramidal	2	216	101.186	Point 1	476.531	102.638	90.856	no cnx
2019_08_26_exp2_TH	3	pyramidal	2	216	101.186	Point 3	580.119	268.496	90.856	no cnx
2019_08_26_exp2_TH	3	pyramidal	2	216	101.186	Point 2	523.645	201.983	90.856	excitatory
2019_08_26_exp2_TH	3	pyramidal	2	216	101.186	Point 9	450.608	101.716	90.856	no cnx
2019_08_26_exp2_TH	3	pyramidal	2	216	101.186	Point 8	443.71	120.955	90.856	no cnx
2019_08_26_exp2_TH	3	pyramidal	2	216	101.186	Point 32	476.671	217.009	80.996	no cnx
2019_08_26_exp2_TH	3	pyramidal	2	216	101.186	Point 48	487.338	373.519	68.416	no cnx
2019_08_26_exp2_TH	3	pyramidal	2	216	101.186	Point 49	445.538	190.051	68.416	no cnx
2019_08_26_exp2_TH	3	pyramidal	2	216	101.186	Point 42	532.315	372.111	68.416	no cnx
2019_08_26_exp2_TH	3	pyramidal	2	216	101.186	Point 43	551.594	310.697	68.416	no cnx
2019_08_26_exp2_TH	3	pyramidal	2	216	101.186	Point 40	452.211	247.33	68.416	no cnx
2019_08_26_exp2_TH	3	pyramidal	2	216	101.186	Point 41	420.41	252.799	68.416	no cnx
2019_08_26_exp2_TH	3	pyramidal	2	216	101.186	Point 46	537.15	344.215	68.416	no cnx
2019_08_26_exp2_TH	3	pyramidal	2	216	101.186	Point 47	498.213	433.694	68.416	no cnx
2019_08_26_exp2_TH	3	pyramidal	2	216	101.186	Point 44	479.96	294.923	68.416	no cnx
2019_08_26_exp2_TH	3	pyramidal	2	216	101.186	Point 45	469.172	415.584	68.416	no cnx
2019_08_26_exp2_TH	3	pyramidal	2	216	101.186	Point 28	497.049	340.259	80.996	no cnx
2019_08_26_exp2_TH	3	pyramidal	2	216	101.186	Point 29	448.669	375.846	80.996	no cnx
2019_08_26_exp2_TH	3	pyramidal	2	216	101.186	Point 20	500.973	219.905	86.686	no cnx
2019_08_26_exp2_TH	3	pyramidal	2	216	101.186	Point 21	529.75	439.828	80.996	no cnx
2019_08_26_exp2_TH	3	pyramidal	2	216	101.186	Point 22	474.465	328.046	80.996	no cnx
2019_08_26_exp2_TH	3	pyramidal	2	216	101.186	Point 23	484.3	396.001	80.996	no cnx
2019_08_26_exp2_TH	3	pyramidal	2	216	101.186	Point 24	518.774	249.987	80.996	no cnx
2019_08_26_exp2_TH	3	pyramidal	2	216	101.186	Point 25	516.952	362.722	80.996	no cnx
2019_08_26_exp2_TH	3	pyramidal	2	216	101.186	Point 26	465.008	245.184	80.996	no cnx
2019_08_26_exp2_TH	3	pyramidal	2	216	101.186	Point 27	418.948	179.708	80.996	no cnx
2019_08_26_exp2_TH	3	pyramidal	2	216	101.186	Point 39	474.026	437.042	68.416	no cnx
2019_08_26_exp2_TH	3	pyramidal	2	216	101.186	Point 33	486.143	283.25	80.996	no cnx
2019_08_26_exp2_TH	3	pyramidal	2	216	101.186	Point 38	542.668	400.287	68.416	no cnx
2019_08_26_exp2_TH	0	pyramidal	2	229	120.836	Point 11	475.485	-83.1445	86.686	no cnx
2019_08_26_exp2_TH	0	pyramidal	2	229	120.836	Point 10	526.533	-127.291	90.856	no cnx
2019_08_26_exp2_TH	0	pyramidal	2	229	120.836	Point 13	546.565	86.7996	86.686	no cnx
2019_08_26_exp2_TH	0	pyramidal	2	229	120.836	Point 12	505.871	49.4325	86.686	no cnx
2019_08_26_exp2_TH	0	pyramidal	2	229	120.836	Point 15	475.859	-173.586	86.686	no cnx
2019_08_26_exp2_TH	0	pyramidal	2	229	120.836	Point 14	618.901	17.0991	86.686	no cnx
2019_08_26_exp2_TH	0	pyramidal	2	229	120.836	Point 17	444.964	-140.062	86.686	no cnx
2019_08_26_exp2_TH	0	pyramidal	2	229	120.836	Point 16	551.596	36.3035	86.686	no cnx
2019_08_26_exp2_TH	0	pyramidal	2	229	120.836	Point 19	490.4	64.2643	86.686	no cnx
2019_08_26_exp2_TH	0	pyramidal	2	229	120.836	Point 18	517.001	77.6633	86.686	no cnx
2019_08_26_exp2_TH	0	pyramidal	2	229	120.836	Point 30	458.179	19.0459	80.996	no cnx
2019_08_26_exp2_TH	0	pyramidal	2	229	120.836	Point 37	499.47	22.861	80.996	no cnx
2019_08_26_exp2_TH	0	pyramidal	2	229	120.836	Point 36	495.614	233.326	80.996	no cnx
2019_08_26_exp2_TH	0	pyramidal	2	229	120.836	Point 34	483.415	137.993	80.996	no cnx
2019_08_26_exp2_TH	0	pyramidal	2	229	120.836	Point 5	528.989	-157.446	90.856	no cnx
2019_08_26_exp2_TH	0	pyramidal	2	229	120.836	Point 4	552.045	-55.5161	90.856	no cnx
2019_08_26_exp2_TH	0	pyramidal	2	229	120.836	Point 7	482.561	-180.337	90.856	no cnx
2019_08_26_exp2_TH	0	pyramidal	2	229	120.836	Point 6	501.335	-96.5467	90.856	no cnx
2019_08_26_exp2_TH	0	pyramidal	2	229	120.836	Point 1	477.381	-106.129	90.856	no cnx
2019_08_26_exp2_TH	0	pyramidal	2	229	120.836	Point 3	580.97	59.729	90.856	no cnx
2019_08_26_exp2_TH	0	pyramidal	2	229	120.836	Point 2	524.496	-6.78401	90.856	no cnx
2019_08_26_exp2_TH	0	pyramidal	2	229	120.836	Point 9	451.458	-107.051	90.856	no cnx
2019_08_26_exp2_TH	0	pyramidal	2	229	120.836	Point 8	444.56	-87.8118	90.856	no cnx
2019_08_26_exp2_TH	0	pyramidal	2	229	120.836	Point 32	477.521	8.24218	80.996	no cnx
2019_08_26_exp2_TH	0	pyramidal	2	229	120.836	Point 28	497.899	131.492	80.996	no cnx
2019_08_26_exp2_TH	0	pyramidal	2	229	120.836	Point 29	449.519	167.078	80.996	no cnx
2019_08_26_exp2_TH	0	pyramidal	2	229	120.836	Point 20	501.823	11.1375	86.686	no cnx
2019_08_26_exp2_TH	0	pyramidal	2	229	120.836	Point 21	530.6	231.061	80.996	no cnx
2019_08_26_exp2_TH	0	pyramidal	2	229	120.836	Point 22	475.315	119.279	80.996	no cnx
2019_08_26_exp2_TH	0	pyramidal	2	229	120.836	Point 23	485.15	187.234	80.996	no cnx
2019_08_26_exp2_TH	0	pyramidal	2	229	120.836	Point 24	519.624	41.2196	80.996	no cnx
2019_08_26_exp2_TH	0	pyramidal	2	229	120.836	Point 25	517.802	153.955	80.996	no cnx
2019_08_26_exp2_TH	0	pyramidal	2	229	120.836	Point 26	465.858	36.4164	80.996	no cnx
2019_08_26_exp2_TH	0	pyramidal	2	229	120.836	Point 33	486.993	74.483	80.996	no cnx
2019_08_26_exp1_TH	1	pyramidal	2	155	230.716	Point 51	453.689	365.929	203.616	no cnx
2019_08_26_exp1_TH	1	pyramidal	2	155	230.716	Point 50	421.379	411.549	203.616	no cnx
2019_08_26_exp1_TH	1	pyramidal	2	155	230.716	Point 53	474.241	402.846	203.616	no cnx
2019_08_26_exp1_TH	1	pyramidal	2	155	230.716	Point 52	505.949	456.62	203.616	no cnx
2019_08_26_exp1_TH	1	pyramidal	2	155	230.716	Point 11	567.559	110.912	192.216	no cnx
2019_08_26_exp1_TH	1	pyramidal	2	155	230.716	Point 10	481.18	183.766	215.806	excitatory
2019_08_26_exp1_TH	1	pyramidal	2	155	230.716	Point 13	487.996	301.43	192.216	no cnx
2019_08_26_exp1_TH	1	pyramidal	2	155	230.716	Point 12	534.629	241.02	215.806	excitatory
2019_08_26_exp1_TH	1	pyramidal	2	155	230.716	Point 15	573.111	313.83	192.216	no cnx
2019_08_26_exp1_TH	1	pyramidal	2	155	230.716	Point 14	540.198	210.128	192.216	no cnx
2019_08_26_exp1_TH	1	pyramidal	2	155	230.716	Point 17	598.28	217.254	192.216	no cnx
2019_08_26_exp1_TH	1	pyramidal	2	155	230.716	Point 16	589.803	143.577	192.216	no cnx
2019_08_26_exp1_TH	1	pyramidal	2	155	230.716	Point 19	501.182	258.111	197.166	no cnx
2019_08_26_exp1_TH	1	pyramidal	2	155	230.716	Point 18	559.36	94.9785	192.216	no cnx
2019_08_26_exp1_TH	1	pyramidal	2	155	230.716	Point 31	463.976	435.862	199.466	no cnx
2019_08_26_exp1_TH	1	pyramidal	2	155	230.716	Point 30	481.971	466.581	199.466	no cnx
2019_08_26_exp1_TH	1	pyramidal	2	155	230.716	Point 37	580.949	419.152	200.616	no cnx
2019_08_26_exp1_TH	1	pyramidal	2	155	230.716	Point 36	447.375	482.812	200.616	no cnx
2019_08_26_exp1_TH	1	pyramidal	2	155	230.716	Point 35	616.695	355.349	199.466	no cnx
2019_08_26_exp1_TH	1	pyramidal	2	155	230.716	Point 34	540.685	276.217	219.536	excitatory
2019_08_26_exp1_TH	1	pyramidal	2	155	230.716	Point 5	514.365	85.6023	204.786	no cnx
2019_08_26_exp1_TH	1	pyramidal	2	155	230.716	Point 4	528.738	42.2417	204.786	no cnx
2019_08_26_exp1_TH	1	pyramidal	2	155	230.716	Point 7	582.672	234.409	192.216	no cnx
2019_08_26_exp1_TH	1	pyramidal	2	155	230.716	Point 6	516.881	65.6921	192.216	no cnx
2019_08_26_exp1_TH	1	pyramidal	2	155	230.716	Point 1	525.653	228.419	204.786	no cnx
2019_08_26_exp1_TH	1	pyramidal	2	155	230.716	Point 3	533.164	113.133	204.786	no cnx
2019_08_26_exp1_TH	1	pyramidal	2	155	230.716	Point 2	507.163	112.74	204.786	no cnx
2019_08_26_exp1_TH	1	pyramidal	2	155	230.716	Point 9	513.012	239.463	192.216	no cnx
2019_08_26_exp1_TH	1	pyramidal	2	155	230.716	Point 8	579.86	113.141	192.216	no cnx
2019_08_26_exp1_TH	1	pyramidal	2	155	230.716	Point 32	499.863	366.893	199.466	no cnx
2019_08_26_exp1_TH	1	pyramidal	2	155	230.716	Point 48	540.754	416.914	203.616	no cnx
2019_08_26_exp1_TH	1	pyramidal	2	155	230.716	Point 49	483.865	381.99	203.616	no cnx
2019_08_26_exp1_TH	1	pyramidal	2	155	230.716	Point 42	451.457	436.746	200.616	no cnx
2019_08_26_exp1_TH	1	pyramidal	2	155	230.716	Point 43	564.149	331.188	200.616	no cnx
2019_08_26_exp1_TH	1	pyramidal	2	155	230.716	Point 40	438.675	360.187	200.616	no cnx
2019_08_26_exp1_TH	1	pyramidal	2	155	230.716	Point 41	461.249	324.217	200.616	no cnx
2019_08_26_exp1_TH	1	pyramidal	2	155	230.716	Point 46	496.084	387.095	203.616	no cnx
2019_08_26_exp1_TH	1	pyramidal	2	155	230.716	Point 47	459.881	530.367	203.616	no cnx
2019_08_26_exp1_TH	1	pyramidal	2	155	230.716	Point 44	452.046	345.972	203.616	no cnx
2019_08_26_exp1_TH	1	pyramidal	2	155	230.716	Point 45	441.447	452.593	203.616	no cnx
2019_08_26_exp1_TH	1	pyramidal	2	155	230.716	Point 28	601.89	424.754	199.466	no cnx
2019_08_26_exp1_TH	1	pyramidal	2	155	230.716	Point 29	638.536	554.206	199.466	no cnx
2019_08_26_exp1_TH	1	pyramidal	2	155	230.716	Point 20	531.53	304.869	207.556	excitatory
2019_08_26_exp1_TH	1	pyramidal	2	155	230.716	Point 21	539.92	86.3087	197.166	no cnx
2019_08_26_exp1_TH	1	pyramidal	2	155	230.716	Point 22	513.103	192.87	207.556	excitatory
2019_08_26_exp1_TH	1	pyramidal	2	155	230.716	Point 23	563.433	141.553	197.166	no cnx
2019_08_26_exp1_TH	1	pyramidal	2	155	230.716	Point 24	584.543	71.6965	207.556	excitatory
2019_08_26_exp1_TH	1	pyramidal	2	155	230.716	Point 25	444.832	301.728	199.466	no cnx
2019_08_26_exp1_TH	1	pyramidal	2	155	230.716	Point 26	512.361	293.297	199.466	no cnx
2019_08_26_exp1_TH	1	pyramidal	2	155	230.716	Point 27	508.437	474.216	199.466	no cnx
2019_08_26_exp1_TH	1	pyramidal	2	155	230.716	Point 39	451.575	450.714	200.616	no cnx
2019_08_26_exp1_TH	1	pyramidal	2	155	230.716	Point 33	598.194	325.556	199.466	no cnx
2019_08_26_exp1_TH	1	pyramidal	2	155	230.716	Point 38	446.92	318.559	200.616	no cnx
2019_08_23_exp2_TH	2	pyramidal	2	144	-16.544	Point 59	629.409	-67.2587	-10.764	no cnx
2019_08_23_exp2_TH	2	pyramidal	2	144	-16.544	Point 58	557.25	-64.2667	-10.764	no cnx
2019_08_23_exp2_TH	2	pyramidal	2	144	-16.544	Point 55	477.799	-218.493	-10.764	no cnx
2019_08_23_exp2_TH	2	pyramidal	2	144	-16.544	Point 54	525.012	-34.1013	-10.764	no cnx
2019_08_23_exp2_TH	2	pyramidal	2	144	-16.544	Point 57	691.359	-149.801	-10.764	no cnx
2019_08_23_exp2_TH	2	pyramidal	2	144	-16.544	Point 56	586.529	-102.57	-10.764	no cnx
2019_08_23_exp2_TH	2	pyramidal	2	144	-16.544	Point 51	494.619	-69.5291	-10.764	no cnx
2019_08_23_exp2_TH	2	pyramidal	2	144	-16.544	Point 50	524.684	-196.018	-10.764	no cnx
2019_08_23_exp2_TH	2	pyramidal	2	144	-16.544	Point 53	637.432	-160.937	-10.764	no cnx
2019_08_23_exp2_TH	2	pyramidal	2	144	-16.544	Point 52	644.677	-111.307	-10.764	no cnx
2019_08_23_exp2_TH	2	pyramidal	2	144	-16.544	Point 11	570.408	67.9469	15.886	no cnx
2019_08_23_exp2_TH	2	pyramidal	2	144	-16.544	Point 10	616.91	-54.7834	22.936	no cnx
2019_08_23_exp2_TH	2	pyramidal	2	144	-16.544	Point 13	507.415	144.865	15.886	no cnx
2019_08_23_exp2_TH	2	pyramidal	2	144	-16.544	Point 12	504.572	27.2914	15.886	no cnx
2019_08_23_exp2_TH	2	pyramidal	2	144	-16.544	Point 15	695.149	-39.4219	15.886	no cnx
2019_08_23_exp2_TH	2	pyramidal	2	144	-16.544	Point 14	610.953	102.478	15.886	no cnx
2019_08_23_exp2_TH	2	pyramidal	2	144	-16.544	Point 17	630.743	-1.30547	15.886	no cnx
2019_08_23_exp2_TH	2	pyramidal	2	144	-16.544	Point 16	568.313	86.377	15.886	no cnx
2019_08_23_exp2_TH	2	pyramidal	2	144	-16.544	Point 19	597.526	69.7505	15.886	no cnx
2019_08_23_exp2_TH	2	pyramidal	2	144	-16.544	Point 18	543.513	47.3949	15.886	no cnx
2019_08_23_exp2_TH	2	pyramidal	2	144	-16.544	Point 31	551.887	60.6754	7.186	no cnx
2019_08_23_exp2_TH	2	pyramidal	2	144	-16.544	Point 30	610.332	78.9707	7.186	no cnx
2019_08_23_exp2_TH	2	pyramidal	2	144	-16.544	Point 37	676.153	5.73368	7.916	no cnx
2019_08_23_exp2_TH	2	pyramidal	2	144	-16.544	Point 36	667.217	37.8273	7.916	no cnx
2019_08_23_exp2_TH	2	pyramidal	2	144	-16.544	Point 35	479.773	37.9783	7.916	no cnx
2019_08_23_exp2_TH	2	pyramidal	2	144	-16.544	Point 34	553.328	-72.2704	7.916	no cnx
2019_08_23_exp2_TH	2	pyramidal	2	144	-16.544	Point 5	535.405	-6.63831	22.936	no cnx
2019_08_23_exp2_TH	2	pyramidal	2	144	-16.544	Point 4	523.985	104.532	22.936	no cnx
2019_08_23_exp2_TH	2	pyramidal	2	144	-16.544	Point 7	705.808	-5.80294	22.936	no cnx
2019_08_23_exp2_TH	2	pyramidal	2	144	-16.544	Point 6	583.484	-28.6454	22.936	no cnx
2019_08_23_exp2_TH	2	pyramidal	2	144	-16.544	Point 1	527.527	-3.14594	22.936	no cnx
2019_08_23_exp2_TH	2	pyramidal	2	144	-16.544	Point 3	701.008	118.33	22.936	no cnx
2019_08_23_exp2_TH	2	pyramidal	2	144	-16.544	Point 2	635.878	33.0781	22.936	no cnx
2019_08_23_exp2_TH	2	pyramidal	2	144	-16.544	Point 9	533.967	-26.5226	22.936	no cnx
2019_08_23_exp2_TH	2	pyramidal	2	144	-16.544	Point 8	556.417	46.8746	22.936	no cnx
2019_08_23_exp2_TH	2	pyramidal	2	144	-16.544	Point 32	524.404	-75.9695	7.186	no cnx
2019_08_23_exp2_TH	2	pyramidal	2	144	-16.544	Point 48	499.297	-111.077	0.966	no cnx
2019_08_23_exp2_TH	2	pyramidal	2	144	-16.544	Point 49	479.621	-109.926	0.966	no cnx
2019_08_23_exp2_TH	2	pyramidal	2	144	-16.544	Point 42	543.58	-35.0529	0.966	no cnx
2019_08_23_exp2_TH	2	pyramidal	2	144	-16.544	Point 43	501.766	61.7575	0.966	no cnx
2019_08_23_exp2_TH	2	pyramidal	2	144	-16.544	Point 40	604.336	1.19969	0.966	no cnx
2019_08_23_exp2_TH	2	pyramidal	2	144	-16.544	Point 41	547.907	32.5029	0.966	no cnx
2019_08_23_exp2_TH	2	pyramidal	2	144	-16.544	Point 46	572.799	-42.9932	0.966	no cnx
2019_08_23_exp2_TH	2	pyramidal	2	144	-16.544	Point 47	676.314	-58.6357	0.966	no cnx
2019_08_23_exp2_TH	2	pyramidal	2	144	-16.544	Point 44	518.597	-42.0616	0.966	no cnx
2019_08_23_exp2_TH	2	pyramidal	2	144	-16.544	Point 45	511.935	-144.679	0.966	no cnx
2019_08_23_exp2_TH	2	pyramidal	2	144	-16.544	Point 28	613.468	24.7251	7.186	no cnx
2019_08_23_exp2_TH	2	pyramidal	2	144	-16.544	Point 29	504.9	-77.5872	7.186	no cnx
2019_08_23_exp2_TH	2	pyramidal	2	144	-16.544	Point 60	673.79	-79.8793	-10.764	no cnx
2019_08_23_exp2_TH	2	pyramidal	2	144	-16.544	Point 61	536.832	-171.85	-10.764	no cnx
2019_08_23_exp2_TH	2	pyramidal	2	144	-16.544	Point 62	563.465	-99.3037	-10.764	no cnx
2019_08_23_exp2_TH	2	pyramidal	2	144	-16.544	Point 63	586.117	-37.2179	-10.764	no cnx
2019_08_23_exp2_TH	2	pyramidal	2	144	-16.544	Point 20	508.237	55.2067	15.886	no cnx
2019_08_23_exp2_TH	2	pyramidal	2	144	-16.544	Point 21	537.134	97.8615	15.886	no cnx
2019_08_23_exp2_TH	2	pyramidal	2	144	-16.544	Point 22	503.127	18.1644	7.186	excitatory
2019_08_23_exp2_TH	2	pyramidal	2	144	-16.544	Point 23	606.706	38.5447	7.186	no cnx
2019_08_23_exp2_TH	2	pyramidal	2	144	-16.544	Point 24	558.156	-28.1564	7.186	no cnx
2019_08_23_exp2_TH	2	pyramidal	2	144	-16.544	Point 25	682.376	-50.9604	7.186	no cnx
2019_08_23_exp2_TH	2	pyramidal	2	144	-16.544	Point 26	572.474	-101.946	7.186	no cnx
2019_08_23_exp2_TH	2	pyramidal	2	144	-16.544	Point 27	541.059	4.07135	7.186	no cnx
2019_08_23_exp2_TH	2	pyramidal	2	144	-16.544	Point 39	522.392	-4.41533	0.966	no cnx
2019_08_23_exp2_TH	2	pyramidal	2	144	-16.544	Point 33	630.659	-19.0429	7.916	no cnx
2019_08_23_exp2_TH	2	pyramidal	2	144	-16.544	Point 38	512.201	88.8243	0.966	no cnx
2019_08_23_exp1_TH	3	pyramidal	2	231	-88.4342	Point 51	683.038	-338.348	-119.634	no cnx
2019_08_23_exp1_TH	3	pyramidal	2	231	-88.4342	Point 50	599.357	-412.538	-119.634	no cnx
2019_08_23_exp1_TH	3	pyramidal	2	231	-88.4342	Point 52	549.098	-342.515	-119.634	no cnx
2019_08_23_exp1_TH	3	pyramidal	2	231	-88.4342	Point 11	609.108	-297.308	-89.514	no cnx
2019_08_23_exp1_TH	3	pyramidal	2	231	-88.4342	Point 10	572.111	-283.762	-89.514	no cnx
2019_08_23_exp1_TH	3	pyramidal	2	231	-88.4342	Point 13	665.677	-473.893	-89.514	no cnx
2019_08_23_exp1_TH	3	pyramidal	2	231	-88.4342	Point 12	553.515	-299.57	-89.514	no cnx
2019_08_23_exp1_TH	3	pyramidal	2	231	-88.4342	Point 15	735.952	-367.987	-97.764	no cnx
2019_08_23_exp1_TH	3	pyramidal	2	231	-88.4342	Point 14	581.596	-508.388	-97.764	no cnx
2019_08_23_exp1_TH	3	pyramidal	2	231	-88.4342	Point 17	576.011	-456.259	-97.764	no cnx
2019_08_23_exp1_TH	3	pyramidal	2	231	-88.4342	Point 16	758.554	-433.29	-97.764	no cnx
2019_08_23_exp1_TH	3	pyramidal	2	231	-88.4342	Point 19	513.694	-313.87	-97.764	no cnx
2019_08_23_exp1_TH	3	pyramidal	2	231	-88.4342	Point 18	540.394	-374.414	-97.764	no cnx
2019_08_23_exp1_TH	3	pyramidal	2	231	-88.4342	Point 31	503.681	-381.192	-102.254	no cnx
2019_08_23_exp1_TH	3	pyramidal	2	231	-88.4342	Point 30	586.765	-383.284	-102.254	no cnx
2019_08_23_exp1_TH	3	pyramidal	2	231	-88.4342	Point 37	515.386	-427.201	-109.824	no cnx
2019_08_23_exp1_TH	3	pyramidal	2	231	-88.4342	Point 36	723.654	-339.555	-109.824	no cnx
2019_08_23_exp1_TH	3	pyramidal	2	231	-88.4342	Point 35	667.963	-325.078	-109.824	no cnx
2019_08_23_exp1_TH	3	pyramidal	2	231	-88.4342	Point 34	536.82	-435.985	-109.824	no cnx
2019_08_23_exp1_TH	3	pyramidal	2	231	-88.4342	Point 5	697.507	-483.217	-89.044	no cnx
2019_08_23_exp1_TH	3	pyramidal	2	231	-88.4342	Point 4	618.809	-458.578	-89.044	no cnx
2019_08_23_exp1_TH	3	pyramidal	2	231	-88.4342	Point 7	547.444	-369.169	-89.044	no cnx
2019_08_23_exp1_TH	3	pyramidal	2	231	-88.4342	Point 6	582.564	-340.07	-89.044	no cnx
2019_08_23_exp1_TH	3	pyramidal	2	231	-88.4342	Point 1	572.425	-471.826	-89.044	no cnx
2019_08_23_exp1_TH	3	pyramidal	2	231	-88.4342	Point 3	704.057	-407.978	-89.044	no cnx
2019_08_23_exp1_TH	3	pyramidal	2	231	-88.4342	Point 2	570.549	-354.355	-89.044	no cnx
2019_08_23_exp1_TH	3	pyramidal	2	231	-88.4342	Point 9	614.838	-375.404	-89.044	no cnx
2019_08_23_exp1_TH	3	pyramidal	2	231	-88.4342	Point 8	632.361	-468.843	-89.044	no cnx
2019_08_23_exp1_TH	3	pyramidal	2	231	-88.4342	Point 32	736.954	-400.776	-102.254	no cnx
2019_08_23_exp1_TH	3	pyramidal	2	231	-88.4342	Point 48	691.7	-436.257	-119.634	no cnx
2019_08_23_exp1_TH	3	pyramidal	2	231	-88.4342	Point 49	589.866	-550.83	-119.634	no cnx
2019_08_23_exp1_TH	3	pyramidal	2	231	-88.4342	Point 42	596.258	-431.135	-109.824	no cnx
2019_08_23_exp1_TH	3	pyramidal	2	231	-88.4342	Point 43	526.818	-385.989	-109.824	no cnx
2019_08_23_exp1_TH	3	pyramidal	2	231	-88.4342	Point 40	706.104	-373.766	-109.824	no cnx
2019_08_23_exp1_TH	3	pyramidal	2	231	-88.4342	Point 41	527.377	-411.253	-109.824	no cnx
2019_08_23_exp1_TH	3	pyramidal	2	231	-88.4342	Point 46	599.216	-481.805	-119.634	no cnx
2019_08_23_exp1_TH	3	pyramidal	2	231	-88.4342	Point 47	636.31	-523.646	-119.634	no cnx
2019_08_23_exp1_TH	3	pyramidal	2	231	-88.4342	Point 44	690.769	-380.641	-109.824	no cnx
2019_08_23_exp1_TH	3	pyramidal	2	231	-88.4342	Point 45	551.752	-498.944	-119.634	no cnx
2019_08_23_exp1_TH	3	pyramidal	2	231	-88.4342	Point 28	579.194	-377.32	-102.254	no cnx
2019_08_23_exp1_TH	3	pyramidal	2	231	-88.4342	Point 29	570.782	-456.622	-102.254	no cnx
2019_08_23_exp1_TH	3	pyramidal	2	231	-88.4342	Point 20	591.523	-288.054	-97.764	no cnx
2019_08_23_exp1_TH	3	pyramidal	2	231	-88.4342	Point 21	622.005	-541.879	-97.764	no cnx
2019_08_23_exp1_TH	3	pyramidal	2	231	-88.4342	Point 22	662.009	-292.376	-97.764	no cnx
2019_08_23_exp1_TH	3	pyramidal	2	231	-88.4342	Point 23	578.222	-300.727	-97.764	no cnx
2019_08_23_exp1_TH	3	pyramidal	2	231	-88.4342	Point 24	580.533	-347.461	-97.764	no cnx
2019_08_23_exp1_TH	3	pyramidal	2	231	-88.4342	Point 25	622.9	-289.465	-97.764	no cnx
2019_08_23_exp1_TH	3	pyramidal	2	231	-88.4342	Point 26	721.366	-416.382	-97.764	no cnx
2019_08_23_exp1_TH	3	pyramidal	2	231	-88.4342	Point 27	586.007	-476.094	-97.764	no cnx
2019_08_23_exp1_TH	3	pyramidal	2	231	-88.4342	Point 39	550.155	-430.858	-109.824	no cnx
2019_08_23_exp1_TH	3	pyramidal	2	231	-88.4342	Point 33	569.494	-537.957	-109.824	no cnx
2019_08_23_exp1_TH	3	pyramidal	2	231	-88.4342	Point 38	530.824	-290.062	-109.824	no cnx
2019_08_22_exp3_TH	2	pyramidal	2	188	-15.8842	Point 11	687.276	70.1731	-70.324	no cnx
2019_08_22_exp3_TH	2	pyramidal	2	188	-15.8842	Point 10	686.913	23.7867	-70.324	no cnx
2019_08_22_exp3_TH	2	pyramidal	2	188	-15.8842	Point 13	582.534	143.71	-70.324	no cnx
2019_08_22_exp3_TH	2	pyramidal	2	188	-15.8842	Point 12	615.173	73.3914	-70.324	excitatory
2019_08_22_exp3_TH	2	pyramidal	2	188	-15.8842	Point 15	545.331	111.255	-70.324	no cnx
2019_08_22_exp3_TH	2	pyramidal	2	188	-15.8842	Point 14	510.855	125.758	-70.324	no cnx
2019_08_22_exp3_TH	2	pyramidal	2	188	-15.8842	Point 17	584.039	90.8923	-70.324	no cnx
2019_08_22_exp3_TH	2	pyramidal	2	188	-15.8842	Point 16	577.77	-3.53365	-70.324	no cnx
2019_08_22_exp3_TH	2	pyramidal	2	188	-15.8842	Point 19	541.003	47.4793	-78.574	no cnx
2019_08_22_exp3_TH	2	pyramidal	2	188	-15.8842	Point 18	576.977	55.3995	-70.324	no cnx
2019_08_22_exp3_TH	2	pyramidal	2	188	-15.8842	Point 30	546.404	135.243	-67.584	excitatory
2019_08_22_exp3_TH	2	pyramidal	2	188	-15.8842	Point 37	536.251	153.604	-83.774	no cnx
2019_08_22_exp3_TH	2	pyramidal	2	188	-15.8842	Point 36	501.858	149.079	-83.774	no cnx
2019_08_22_exp3_TH	2	pyramidal	2	188	-15.8842	Point 35	687.128	148.347	-83.774	no cnx
2019_08_22_exp3_TH	2	pyramidal	2	188	-15.8842	Point 34	610.193	117.561	-83.774	no cnx
2019_08_22_exp3_TH	2	pyramidal	2	188	-15.8842	Point 5	549.803	128.228	-62.424	excitatory
2019_08_22_exp3_TH	2	pyramidal	2	188	-15.8842	Point 4	612.515	62.1282	-62.424	no cnx
2019_08_22_exp3_TH	2	pyramidal	2	188	-15.8842	Point 7	558.69	135.008	-62.424	no cnx
2019_08_22_exp3_TH	2	pyramidal	2	188	-15.8842	Point 6	706.342	27.548	-62.424	excitatory
2019_08_22_exp3_TH	2	pyramidal	2	188	-15.8842	Point 1	543.969	54.8222	-62.424	no cnx
2019_08_22_exp3_TH	2	pyramidal	2	188	-15.8842	Point 3	526.76	75.5032	-62.424	no cnx
2019_08_22_exp3_TH	2	pyramidal	2	188	-15.8842	Point 2	688.985	41.8777	-62.424	no cnx
2019_08_22_exp3_TH	2	pyramidal	2	188	-15.8842	Point 9	636.001	58.4048	-70.324	no cnx
2019_08_22_exp3_TH	2	pyramidal	2	188	-15.8842	Point 8	521.312	95.4385	-70.324	no cnx
2019_08_22_exp3_TH	2	pyramidal	2	188	-15.8842	Point 32	528.131	89.1445	-83.774	no cnx
2019_08_22_exp3_TH	2	pyramidal	2	188	-15.8842	Point 42	640.617	59.9417	-92.834	no cnx
2019_08_22_exp3_TH	2	pyramidal	2	188	-15.8842	Point 43	687.721	61.6158	-92.834	no cnx
2019_08_22_exp3_TH	2	pyramidal	2	188	-15.8842	Point 40	706.841	97.5445	-92.834	no cnx
2019_08_22_exp3_TH	2	pyramidal	2	188	-15.8842	Point 41	589.271	89.968	-92.834	excitatory
2019_08_22_exp3_TH	2	pyramidal	2	188	-15.8842	Point 28	588.258	143.857	-78.574	no cnx
2019_08_22_exp3_TH	2	pyramidal	2	188	-15.8842	Point 29	617.349	106.206	-78.574	no cnx
2019_08_22_exp3_TH	2	pyramidal	2	188	-15.8842	Point 20	611.939	132.237	-78.574	no cnx
2019_08_22_exp3_TH	2	pyramidal	2	188	-15.8842	Point 21	567.802	168.896	-78.574	no cnx
2019_08_22_exp3_TH	2	pyramidal	2	188	-15.8842	Point 22	551.132	31.114	-78.574	no cnx
2019_08_22_exp3_TH	2	pyramidal	2	188	-15.8842	Point 23	573.737	59.213	-78.574	no cnx
2019_08_22_exp3_TH	2	pyramidal	2	188	-15.8842	Point 24	648.741	88.2194	-78.574	no cnx
2019_08_22_exp3_TH	2	pyramidal	2	188	-15.8842	Point 25	652.023	126.934	-78.574	no cnx
2019_08_22_exp3_TH	2	pyramidal	2	188	-15.8842	Point 26	580.334	96.3771	-78.574	no cnx
2019_08_22_exp3_TH	2	pyramidal	2	188	-15.8842	Point 39	602.521	154.991	-92.834	no cnx
2019_08_22_exp3_TH	2	pyramidal	2	188	-15.8842	Point 33	589.982	72.8911	-83.774	no cnx
2019_08_22_exp3_TH	2	pyramidal	2	188	-15.8842	Point 38	500.382	86.4982	-92.834	no cnx
2019_08_22_exp3_TH	1	pyramidal	2	245	-23.8437	Point 11	685.984	146.566	-70.324	no cnx
2019_08_22_exp3_TH	1	pyramidal	2	245	-23.8437	Point 10	685.622	100.18	-70.324	no cnx
2019_08_22_exp3_TH	1	pyramidal	2	245	-23.8437	Point 13	581.243	220.103	-70.324	no cnx
2019_08_22_exp3_TH	1	pyramidal	2	245	-23.8437	Point 12	613.881	149.784	-70.324	no cnx
2019_08_22_exp3_TH	1	pyramidal	2	245	-23.8437	Point 15	544.04	187.648	-70.324	no cnx
2019_08_22_exp3_TH	1	pyramidal	2	245	-23.8437	Point 14	509.564	202.151	-70.324	no cnx
2019_08_22_exp3_TH	1	pyramidal	2	245	-23.8437	Point 17	582.747	167.285	-70.324	no cnx
2019_08_22_exp3_TH	1	pyramidal	2	245	-23.8437	Point 16	576.479	72.8593	-70.324	no cnx
2019_08_22_exp3_TH	1	pyramidal	2	245	-23.8437	Point 19	539.712	123.872	-78.574	excitatory
2019_08_22_exp3_TH	1	pyramidal	2	245	-23.8437	Point 18	575.685	131.792	-70.324	no cnx
2019_08_22_exp3_TH	1	pyramidal	2	245	-23.8437	Point 30	545.112	211.636	-67.584	no cnx
2019_08_22_exp3_TH	1	pyramidal	2	245	-23.8437	Point 37	534.96	229.997	-83.774	no cnx
2019_08_22_exp3_TH	1	pyramidal	2	245	-23.8437	Point 36	500.567	225.472	-83.774	no cnx
2019_08_22_exp3_TH	1	pyramidal	2	245	-23.8437	Point 35	685.837	224.74	-83.774	no cnx
2019_08_22_exp3_TH	1	pyramidal	2	245	-23.8437	Point 34	608.902	193.954	-83.774	no cnx
2019_08_22_exp3_TH	1	pyramidal	2	245	-23.8437	Point 5	548.512	204.621	-62.424	excitatory
2019_08_22_exp3_TH	1	pyramidal	2	245	-23.8437	Point 4	611.223	138.521	-62.424	no cnx
2019_08_22_exp3_TH	1	pyramidal	2	245	-23.8437	Point 7	557.399	211.401	-62.424	no cnx
2019_08_22_exp3_TH	1	pyramidal	2	245	-23.8437	Point 6	705.051	103.941	-62.424	no cnx
2019_08_22_exp3_TH	1	pyramidal	2	245	-23.8437	Point 1	542.678	131.215	-62.424	no cnx
2019_08_22_exp3_TH	1	pyramidal	2	245	-23.8437	Point 3	525.469	151.896	-62.424	no cnx
2019_08_22_exp3_TH	1	pyramidal	2	245	-23.8437	Point 2	687.693	118.271	-62.424	no cnx
2019_08_22_exp3_TH	1	pyramidal	2	245	-23.8437	Point 9	634.709	134.798	-70.324	no cnx
2019_08_22_exp3_TH	1	pyramidal	2	245	-23.8437	Point 8	520.021	171.831	-70.324	no cnx
2019_08_22_exp3_TH	1	pyramidal	2	245	-23.8437	Point 32	526.84	165.537	-83.774	excitatory
2019_08_22_exp3_TH	1	pyramidal	2	245	-23.8437	Point 42	639.326	136.335	-92.834	no cnx
2019_08_22_exp3_TH	1	pyramidal	2	245	-23.8437	Point 43	686.43	138.009	-92.834	no cnx
2019_08_22_exp3_TH	1	pyramidal	2	245	-23.8437	Point 40	705.55	173.937	-92.834	no cnx
2019_08_22_exp3_TH	1	pyramidal	2	245	-23.8437	Point 41	587.98	166.361	-92.834	no cnx
2019_08_22_exp3_TH	1	pyramidal	2	245	-23.8437	Point 28	586.967	220.25	-78.574	no cnx
2019_08_22_exp3_TH	1	pyramidal	2	245	-23.8437	Point 29	616.057	182.599	-78.574	no cnx
2019_08_22_exp3_TH	1	pyramidal	2	245	-23.8437	Point 20	610.647	208.63	-78.574	no cnx
2019_08_22_exp3_TH	1	pyramidal	2	245	-23.8437	Point 21	566.51	245.289	-78.574	excitatory
2019_08_22_exp3_TH	1	pyramidal	2	245	-23.8437	Point 22	549.841	107.507	-78.574	no cnx
2019_08_22_exp3_TH	1	pyramidal	2	245	-23.8437	Point 23	572.445	135.606	-78.574	no cnx
2019_08_22_exp3_TH	1	pyramidal	2	245	-23.8437	Point 24	647.45	164.612	-78.574	no cnx
2019_08_22_exp3_TH	1	pyramidal	2	245	-23.8437	Point 25	650.732	203.327	-78.574	no cnx
2019_08_22_exp3_TH	1	pyramidal	2	245	-23.8437	Point 26	579.042	172.77	-78.574	no cnx
2019_08_22_exp3_TH	1	pyramidal	2	245	-23.8437	Point 39	601.23	231.384	-92.834	no cnx
2019_08_22_exp3_TH	1	pyramidal	2	245	-23.8437	Point 33	588.691	149.284	-83.774	no cnx
2019_08_22_exp3_TH	1	pyramidal	2	245	-23.8437	Point 38	499.09	162.891	-92.834	no cnx
2019_08_22_exp3_TH	0	pyramidal	2	273	-4.73391	Point 11	683.114	175.612	-70.324	no cnx
2019_08_22_exp3_TH	0	pyramidal	2	273	-4.73391	Point 10	682.752	129.225	-70.324	no cnx
2019_08_22_exp3_TH	0	pyramidal	2	273	-4.73391	Point 13	578.372	249.148	-70.324	no cnx
2019_08_22_exp3_TH	0	pyramidal	2	273	-4.73391	Point 12	611.011	178.83	-70.324	no cnx
2019_08_22_exp3_TH	0	pyramidal	2	273	-4.73391	Point 15	541.17	216.693	-70.324	no cnx
2019_08_22_exp3_TH	0	pyramidal	2	273	-4.73391	Point 14	506.694	231.196	-70.324	no cnx
2019_08_22_exp3_TH	0	pyramidal	2	273	-4.73391	Point 17	579.877	196.331	-70.324	no cnx
2019_08_22_exp3_TH	0	pyramidal	2	273	-4.73391	Point 16	573.608	101.905	-70.324	no cnx
2019_08_22_exp3_TH	0	pyramidal	2	273	-4.73391	Point 19	536.842	152.918	-78.574	no cnx
2019_08_22_exp3_TH	0	pyramidal	2	273	-4.73391	Point 18	572.815	160.838	-70.324	no cnx
2019_08_22_exp3_TH	0	pyramidal	2	273	-4.73391	Point 30	542.242	240.681	-67.584	no cnx
2019_08_22_exp3_TH	0	pyramidal	2	273	-4.73391	Point 37	532.09	259.042	-83.774	no cnx
2019_08_22_exp3_TH	0	pyramidal	2	273	-4.73391	Point 36	497.697	254.517	-83.774	no cnx
2019_08_22_exp3_TH	0	pyramidal	2	273	-4.73391	Point 35	682.967	253.785	-83.774	no cnx
2019_08_22_exp3_TH	0	pyramidal	2	273	-4.73391	Point 34	606.032	223	-83.774	no cnx
2019_08_22_exp3_TH	0	pyramidal	2	273	-4.73391	Point 5	545.642	233.667	-62.424	excitatory
2019_08_22_exp3_TH	0	pyramidal	2	273	-4.73391	Point 4	608.353	167.567	-62.424	no cnx
2019_08_22_exp3_TH	0	pyramidal	2	273	-4.73391	Point 7	554.529	240.446	-62.424	no cnx
2019_08_22_exp3_TH	0	pyramidal	2	273	-4.73391	Point 6	702.181	132.986	-62.424	no cnx
2019_08_22_exp3_TH	0	pyramidal	2	273	-4.73391	Point 1	539.807	160.261	-62.424	no cnx
2019_08_22_exp3_TH	0	pyramidal	2	273	-4.73391	Point 3	522.599	180.942	-62.424	no cnx
2019_08_22_exp3_TH	0	pyramidal	2	273	-4.73391	Point 2	684.823	147.316	-62.424	no cnx
2019_08_22_exp3_TH	0	pyramidal	2	273	-4.73391	Point 9	631.839	163.843	-70.324	no cnx
2019_08_22_exp3_TH	0	pyramidal	2	273	-4.73391	Point 8	517.151	200.877	-70.324	no cnx
2019_08_22_exp3_TH	0	pyramidal	2	273	-4.73391	Point 32	523.97	194.583	-83.774	excitatory
2019_08_22_exp3_TH	0	pyramidal	2	273	-4.73391	Point 42	636.456	165.38	-92.834	no cnx
2019_08_22_exp3_TH	0	pyramidal	2	273	-4.73391	Point 43	683.559	167.054	-92.834	no cnx
2019_08_22_exp3_TH	0	pyramidal	2	273	-4.73391	Point 40	702.68	202.983	-92.834	no cnx
2019_08_22_exp3_TH	0	pyramidal	2	273	-4.73391	Point 41	585.109	195.406	-92.834	no cnx
2019_08_22_exp3_TH	0	pyramidal	2	273	-4.73391	Point 28	584.097	249.295	-78.574	no cnx
2019_08_22_exp3_TH	0	pyramidal	2	273	-4.73391	Point 29	613.187	211.645	-78.574	no cnx
2019_08_22_exp3_TH	0	pyramidal	2	273	-4.73391	Point 20	607.777	237.675	-78.574	no cnx
2019_08_22_exp3_TH	0	pyramidal	2	273	-4.73391	Point 21	563.64	274.335	-78.574	no cnx
2019_08_22_exp3_TH	0	pyramidal	2	273	-4.73391	Point 22	546.971	136.552	-78.574	no cnx
2019_08_22_exp3_TH	0	pyramidal	2	273	-4.73391	Point 23	569.575	164.651	-78.574	no cnx
2019_08_22_exp3_TH	0	pyramidal	2	273	-4.73391	Point 24	644.579	193.658	-78.574	no cnx
2019_08_22_exp3_TH	0	pyramidal	2	273	-4.73391	Point 25	647.862	232.372	-78.574	no cnx
2019_08_22_exp3_TH	0	pyramidal	2	273	-4.73391	Point 26	576.172	201.815	-78.574	no cnx
2019_08_22_exp3_TH	0	pyramidal	2	273	-4.73391	Point 39	598.359	260.43	-92.834	no cnx
2019_08_22_exp3_TH	0	pyramidal	2	273	-4.73391	Point 33	585.82	178.329	-83.774	no cnx
2019_08_22_exp3_TH	0	pyramidal	2	273	-4.73391	Point 38	496.22	191.937	-92.834	no cnx
2019_08_22_exp2_TH	3	pyramidal	2	241	-47.2	Point 11	585.074	-286.102	-56.294	no cnx
2019_08_22_exp2_TH	3	pyramidal	2	241	-47.2	Point 10	524.814	-239.597	-56.294	no cnx
2019_08_22_exp2_TH	3	pyramidal	2	241	-47.2	Point 13	554.53	-138.831	-59.954	no cnx
2019_08_22_exp2_TH	3	pyramidal	2	241	-47.2	Point 12	600.342	53.1417	-59.954	no cnx
2019_08_22_exp2_TH	3	pyramidal	2	241	-47.2	Point 15	535.886	-28.6854	-59.954	no cnx
2019_08_22_exp2_TH	3	pyramidal	2	241	-47.2	Point 14	590.701	6.76539	-59.954	no cnx
2019_08_22_exp2_TH	3	pyramidal	2	241	-47.2	Point 17	601.02	69.9672	-59.954	no cnx
2019_08_22_exp2_TH	3	pyramidal	2	241	-47.2	Point 16	621.211	43.2648	-59.954	no cnx
2019_08_22_exp2_TH	3	pyramidal	2	241	-47.2	Point 19	666.113	217.156	-67.914	no cnx
2019_08_22_exp2_TH	3	pyramidal	2	241	-47.2	Point 18	558.313	132.133	-67.914	no cnx
2019_08_22_exp2_TH	3	pyramidal	2	241	-47.2	Point 5	511.694	-175.612	-56.294	no cnx
2019_08_22_exp2_TH	3	pyramidal	2	241	-47.2	Point 4	651.157	-91.5465	-47.244	no cnx
2019_08_22_exp2_TH	3	pyramidal	2	241	-47.2	Point 7	626.785	-242.946	-56.294	no cnx
2019_08_22_exp2_TH	3	pyramidal	2	241	-47.2	Point 6	589.545	-249.286	-56.294	no cnx
2019_08_22_exp2_TH	3	pyramidal	2	241	-47.2	Point 1	586.807	-188.554	-47.244	no cnx
2019_08_22_exp2_TH	3	pyramidal	2	241	-47.2	Point 3	679.394	-178.039	-47.244	no cnx
2019_08_22_exp2_TH	3	pyramidal	2	241	-47.2	Point 2	583.209	-109.144	-47.244	no cnx
2019_08_22_exp2_TH	3	pyramidal	2	241	-47.2	Point 9	642.462	-255.365	-56.294	no cnx
2019_08_22_exp2_TH	3	pyramidal	2	241	-47.2	Point 8	531.309	-222.578	-56.294	no cnx
2019_08_22_exp2_TH	3	pyramidal	2	241	-47.2	Point 20	540.589	214.927	-67.914	no cnx
2019_08_22_exp2_TH	3	pyramidal	2	241	-47.2	Point 21	555.941	162.916	-67.914	no cnx
2019_08_22_exp2_TH	3	pyramidal	2	241	-47.2	Point 22	662.866	191.252	-67.914	no cnx
2019_08_22_exp2_TH	3	pyramidal	2	241	-47.2	Point 23	558.966	34.8631	-67.914	no cnx
2019_08_22_exp2_TH	3	pyramidal	2	241	-47.2	Point 24	565.057	227.601	-67.914	no cnx
2019_08_22_exp2_TH	1	pyramidal	2	187	-47.2	Point 11	576.373	-165.137	-56.294	no cnx
2019_08_22_exp2_TH	1	pyramidal	2	187	-47.2	Point 10	516.113	-118.632	-56.294	no cnx
2019_08_22_exp2_TH	1	pyramidal	2	187	-47.2	Point 13	545.829	-17.8662	-59.954	no cnx
2019_08_22_exp2_TH	1	pyramidal	2	187	-47.2	Point 12	591.641	174.106	-59.954	no cnx
2019_08_22_exp2_TH	1	pyramidal	2	187	-47.2	Point 15	527.185	92.2792	-59.954	no cnx
2019_08_22_exp2_TH	1	pyramidal	2	187	-47.2	Point 14	582	127.73	-59.954	no cnx
2019_08_22_exp2_TH	1	pyramidal	2	187	-47.2	Point 17	592.319	190.932	-59.954	no cnx
2019_08_22_exp2_TH	1	pyramidal	2	187	-47.2	Point 16	612.51	164.229	-59.954	no cnx
2019_08_22_exp2_TH	1	pyramidal	2	187	-47.2	Point 19	657.412	338.121	-67.914	no cnx
2019_08_22_exp2_TH	1	pyramidal	2	187	-47.2	Point 18	549.611	253.097	-67.914	no cnx
2019_08_22_exp2_TH	1	pyramidal	2	187	-47.2	Point 5	502.993	-54.6475	-56.294	no cnx
2019_08_22_exp2_TH	1	pyramidal	2	187	-47.2	Point 4	642.456	29.418	-47.244	no cnx
2019_08_22_exp2_TH	1	pyramidal	2	187	-47.2	Point 7	618.084	-121.981	-56.294	no cnx
2019_08_22_exp2_TH	1	pyramidal	2	187	-47.2	Point 6	580.843	-128.321	-56.294	no cnx
2019_08_22_exp2_TH	1	pyramidal	2	187	-47.2	Point 1	578.106	-67.5895	-47.244	no cnx
2019_08_22_exp2_TH	1	pyramidal	2	187	-47.2	Point 3	670.693	-57.0741	-47.244	no cnx
2019_08_22_exp2_TH	1	pyramidal	2	187	-47.2	Point 2	574.508	11.821	-47.244	no cnx
2019_08_22_exp2_TH	1	pyramidal	2	187	-47.2	Point 9	633.761	-134.401	-56.294	no cnx
2019_08_22_exp2_TH	1	pyramidal	2	187	-47.2	Point 8	522.608	-101.614	-56.294	no cnx
2019_08_22_exp2_TH	1	pyramidal	2	187	-47.2	Point 20	531.888	335.891	-67.914	no cnx
2019_08_22_exp2_TH	1	pyramidal	2	187	-47.2	Point 21	547.24	283.88	-67.914	no cnx
2019_08_22_exp2_TH	1	pyramidal	2	187	-47.2	Point 22	654.165	312.217	-67.914	no cnx
2019_08_22_exp2_TH	1	pyramidal	2	187	-47.2	Point 23	550.265	155.828	-67.914	no cnx
2019_08_22_exp2_TH	1	pyramidal	2	187	-47.2	Point 24	556.356	348.565	-67.914	no cnx
2019_08_22_exp1_TH	3	pyramidal	2	248	77.0302	Point 51	559.848	-113.172	-0.6	no cnx
2019_08_22_exp1_TH	3	pyramidal	2	248	77.0302	Point 50	597.603	-235.919	-0.6	no cnx
2019_08_22_exp1_TH	3	pyramidal	2	248	77.0302	Point 11	540.962	-275.287	51.04	no cnx
2019_08_22_exp1_TH	3	pyramidal	2	248	77.0302	Point 10	613.422	-312.716	51.04	no cnx
2019_08_22_exp1_TH	3	pyramidal	2	248	77.0302	Point 13	546.858	-329.771	51.04	no cnx
2019_08_22_exp1_TH	3	pyramidal	2	248	77.0302	Point 12	666.417	-386.494	51.04	no cnx
2019_08_22_exp1_TH	3	pyramidal	2	248	77.0302	Point 15	568.416	-257.78	51.04	no cnx
2019_08_22_exp1_TH	3	pyramidal	2	248	77.0302	Point 14	604.277	-278.454	51.04	no cnx
2019_08_22_exp1_TH	3	pyramidal	2	248	77.0302	Point 17	496.12	-318.394	39.84	no cnx
2019_08_22_exp1_TH	3	pyramidal	2	248	77.0302	Point 16	647.697	-510.592	39.84	no cnx
2019_08_22_exp1_TH	3	pyramidal	2	248	77.0302	Point 19	635.113	-447.12	39.84	no cnx
2019_08_22_exp1_TH	3	pyramidal	2	248	77.0302	Point 18	652.025	-334.617	39.84	no cnx
2019_08_22_exp1_TH	3	pyramidal	2	248	77.0302	Point 31	599.806	-347.925	32.42	no cnx
2019_08_22_exp1_TH	3	pyramidal	2	248	77.0302	Point 30	540.927	-358.12	32.42	no cnx
2019_08_22_exp1_TH	3	pyramidal	2	248	77.0302	Point 37	594.768	-73.683	4.02	no cnx
2019_08_22_exp1_TH	3	pyramidal	2	248	77.0302	Point 36	476.304	-74.5137	4.02	no cnx
2019_08_22_exp1_TH	3	pyramidal	2	248	77.0302	Point 35	524.722	-53.3005	4.02	no cnx
2019_08_22_exp1_TH	3	pyramidal	2	248	77.0302	Point 34	588.528	-209.035	4.02	no cnx
2019_08_22_exp1_TH	3	pyramidal	2	248	77.0302	Point 5	529.254	-139.009	15.57	no cnx
2019_08_22_exp1_TH	3	pyramidal	2	248	77.0302	Point 4	574.22	-128.707	15.57	no cnx
2019_08_22_exp1_TH	3	pyramidal	2	248	77.0302	Point 7	563.708	-153.682	15.57	no cnx
2019_08_22_exp1_TH	3	pyramidal	2	248	77.0302	Point 6	568.999	-115.682	15.57	no cnx
2019_08_22_exp1_TH	3	pyramidal	2	248	77.0302	Point 1	589.04	-224.213	15.57	no cnx
2019_08_22_exp1_TH	3	pyramidal	2	248	77.0302	Point 3	655.496	-117.037	15.57	no cnx
2019_08_22_exp1_TH	3	pyramidal	2	248	77.0302	Point 2	557.313	-244.129	15.57	no cnx
2019_08_22_exp1_TH	3	pyramidal	2	248	77.0302	Point 9	523.067	-288.602	51.04	no cnx
2019_08_22_exp1_TH	3	pyramidal	2	248	77.0302	Point 8	653.555	-440.309	51.04	no cnx
2019_08_22_exp1_TH	3	pyramidal	2	248	77.0302	Point 32	565.122	-343.497	32.42	no cnx
2019_08_22_exp1_TH	3	pyramidal	2	248	77.0302	Point 48	642.611	-143.144	-0.6	no cnx
2019_08_22_exp1_TH	3	pyramidal	2	248	77.0302	Point 49	545.882	-61.5439	-0.6	no cnx
2019_08_22_exp1_TH	3	pyramidal	2	248	77.0302	Point 42	585.903	-242.51	4.02	no cnx
2019_08_22_exp1_TH	3	pyramidal	2	248	77.0302	Point 43	549.875	-172.807	4.02	no cnx
2019_08_22_exp1_TH	3	pyramidal	2	248	77.0302	Point 40	473.853	-120.682	4.02	no cnx
2019_08_22_exp1_TH	3	pyramidal	2	248	77.0302	Point 41	594.633	-269.898	4.02	no cnx
2019_08_22_exp1_TH	3	pyramidal	2	248	77.0302	Point 46	700.179	-139.22	-0.6	no cnx
2019_08_22_exp1_TH	3	pyramidal	2	248	77.0302	Point 47	567.891	-201.831	-0.6	no cnx
2019_08_22_exp1_TH	3	pyramidal	2	248	77.0302	Point 44	545.946	-41.652	4.02	no cnx
2019_08_22_exp1_TH	3	pyramidal	2	248	77.0302	Point 45	669.168	-6.21551	-0.6	no cnx
2019_08_22_exp1_TH	3	pyramidal	2	248	77.0302	Point 28	634.463	-292.271	32.42	no cnx
2019_08_22_exp1_TH	3	pyramidal	2	248	77.0302	Point 29	582.658	-255.758	32.42	no cnx
2019_08_22_exp1_TH	3	pyramidal	2	248	77.0302	Point 20	639.954	-402.01	39.84	no cnx
2019_08_22_exp1_TH	3	pyramidal	2	248	77.0302	Point 21	491.427	-288.89	39.84	no cnx
2019_08_22_exp1_TH	3	pyramidal	2	248	77.0302	Point 22	602.781	-415.797	39.84	no cnx
2019_08_22_exp1_TH	3	pyramidal	2	248	77.0302	Point 23	588.272	-428.678	39.84	no cnx
2019_08_22_exp1_TH	3	pyramidal	2	248	77.0302	Point 24	578.2	-312.972	32.42	no cnx
2019_08_22_exp1_TH	3	pyramidal	2	248	77.0302	Point 25	725.035	-474.431	32.42	no cnx
2019_08_22_exp1_TH	3	pyramidal	2	248	77.0302	Point 26	611.37	-412.802	32.42	no cnx
2019_08_22_exp1_TH	3	pyramidal	2	248	77.0302	Point 27	597.069	-317.696	32.42	no cnx
2019_08_22_exp1_TH	3	pyramidal	2	248	77.0302	Point 39	534.591	-25.6899	4.02	no cnx
2019_08_22_exp1_TH	3	pyramidal	2	248	77.0302	Point 33	542.002	-294.548	32.42	no cnx
2019_08_22_exp1_TH	3	pyramidal	2	248	77.0302	Point 38	580.076	-165.343	4.02	no cnx
2019_08_09_exp3_TH	2	pyramidal	2	205	306.096	Point 11	716.958	-333.58	340.776	no cnx
2019_08_09_exp3_TH	2	pyramidal	2	205	306.096	Point 10	583.44	-414.122	340.776	no cnx
2019_08_09_exp3_TH	2	pyramidal	2	205	306.096	Point 13	549.399	-267.688	376.286	no cnx
2019_08_09_exp3_TH	2	pyramidal	2	205	306.096	Point 12	574.158	-387.46	340.776	no cnx
2019_08_09_exp3_TH	2	pyramidal	2	205	306.096	Point 15	649.034	-249.237	376.286	no cnx
2019_08_09_exp3_TH	2	pyramidal	2	205	306.096	Point 14	665.475	-95.3034	376.286	no cnx
2019_08_09_exp3_TH	2	pyramidal	2	205	306.096	Point 17	690.046	-253.394	376.286	no cnx
2019_08_09_exp3_TH	2	pyramidal	2	205	306.096	Point 16	542.877	-290.571	376.286	no cnx
2019_08_09_exp3_TH	2	pyramidal	2	205	306.096	Point 19	566.441	-342.446	371.506	no cnx
2019_08_09_exp3_TH	2	pyramidal	2	205	306.096	Point 18	559.765	-265.281	371.506	no cnx
2019_08_09_exp3_TH	2	pyramidal	2	205	306.096	Point 31	481.295	636.436	332.666	no cnx
2019_08_09_exp3_TH	2	pyramidal	2	205	306.096	Point 30	487.252	34.842	375.296	no cnx
2019_08_09_exp3_TH	2	pyramidal	2	205	306.096	Point 37	507.217	581.58	316.776	no cnx
2019_08_09_exp3_TH	2	pyramidal	2	205	306.096	Point 36	455.188	529.624	316.776	no cnx
2019_08_09_exp3_TH	2	pyramidal	2	205	306.096	Point 35	523.311	647.25	332.666	no cnx
2019_08_09_exp3_TH	2	pyramidal	2	205	306.096	Point 34	557.685	580.548	332.666	no cnx
2019_08_09_exp3_TH	2	pyramidal	2	205	306.096	Point 5	597.934	-383.945	351.176	no cnx
2019_08_09_exp3_TH	2	pyramidal	2	205	306.096	Point 4	723.718	-374.125	357.056	no cnx
2019_08_09_exp3_TH	2	pyramidal	2	205	306.096	Point 7	712.153	-309.194	351.176	no cnx
2019_08_09_exp3_TH	2	pyramidal	2	205	306.096	Point 6	613.321	-345.121	351.176	no cnx
2019_08_09_exp3_TH	2	pyramidal	2	205	306.096	Point 1	558.264	-453.785	357.056	no cnx
2019_08_09_exp3_TH	2	pyramidal	2	205	306.096	Point 3	571.86	-414.705	357.056	no cnx
2019_08_09_exp3_TH	2	pyramidal	2	205	306.096	Point 2	627.026	-349.522	357.056	no cnx
2019_08_09_exp3_TH	2	pyramidal	2	205	306.096	Point 9	619.906	-311.569	340.776	no cnx
2019_08_09_exp3_TH	2	pyramidal	2	205	306.096	Point 8	612.334	-397.889	340.776	no cnx
2019_08_09_exp3_TH	2	pyramidal	2	205	306.096	Point 32	545.198	557.025	332.666	no cnx
2019_08_09_exp3_TH	2	pyramidal	2	205	306.096	Point 28	598.536	-456.672	322.966	no cnx
2019_08_09_exp3_TH	2	pyramidal	2	205	306.096	Point 29	511.204	78.4261	375.296	no cnx
2019_08_09_exp3_TH	2	pyramidal	2	205	306.096	Point 20	561.658	-189.203	371.506	no cnx
2019_08_09_exp3_TH	2	pyramidal	2	205	306.096	Point 21	501.44	-131.206	371.506	no cnx
2019_08_09_exp3_TH	2	pyramidal	2	205	306.096	Point 22	594.567	-201.961	359.896	no cnx
2019_08_09_exp3_TH	2	pyramidal	2	205	306.096	Point 23	580.865	-307.971	359.896	no cnx
2019_08_09_exp3_TH	2	pyramidal	2	205	306.096	Point 24	624.204	-329.719	359.896	no cnx
2019_08_09_exp3_TH	2	pyramidal	2	205	306.096	Point 25	603.455	-344.863	359.896	no cnx
2019_08_09_exp3_TH	2	pyramidal	2	205	306.096	Point 26	613.22	-310.34	359.896	no cnx
2019_08_09_exp3_TH	2	pyramidal	2	205	306.096	Point 27	585.63	-424.491	322.966	no cnx
2019_08_09_exp3_TH	2	pyramidal	2	205	306.096	Point 33	591.989	613	332.666	no cnx
2019_08_09_exp3_TH	2	pyramidal	2	205	306.096	Point 38	473.291	557.185	316.776	no cnx
2019_08_09_exp3_TH	1	pyramidal	2	189	321.408	Point 11	717.607	-448.807	340.776	no cnx
2019_08_09_exp3_TH	1	pyramidal	2	189	321.408	Point 10	584.089	-529.349	340.776	no cnx
2019_08_09_exp3_TH	1	pyramidal	2	189	321.408	Point 13	550.048	-382.915	376.286	no cnx
2019_08_09_exp3_TH	1	pyramidal	2	189	321.408	Point 12	574.807	-502.687	340.776	no cnx
2019_08_09_exp3_TH	1	pyramidal	2	189	321.408	Point 15	649.683	-364.464	376.286	no cnx
2019_08_09_exp3_TH	1	pyramidal	2	189	321.408	Point 14	666.123	-210.531	376.286	no cnx
2019_08_09_exp3_TH	1	pyramidal	2	189	321.408	Point 17	690.695	-368.621	376.286	no cnx
2019_08_09_exp3_TH	1	pyramidal	2	189	321.408	Point 16	543.526	-405.799	376.286	no cnx
2019_08_09_exp3_TH	1	pyramidal	2	189	321.408	Point 19	567.09	-457.674	371.506	no cnx
2019_08_09_exp3_TH	1	pyramidal	2	189	321.408	Point 18	560.413	-380.508	371.506	no cnx
2019_08_09_exp3_TH	1	pyramidal	2	189	321.408	Point 31	481.944	521.209	332.666	no cnx
2019_08_09_exp3_TH	1	pyramidal	2	189	321.408	Point 30	487.901	-80.3853	375.296	no cnx
2019_08_09_exp3_TH	1	pyramidal	2	189	321.408	Point 37	507.866	466.353	316.776	no cnx
2019_08_09_exp3_TH	1	pyramidal	2	189	321.408	Point 36	455.837	414.397	316.776	no cnx
2019_08_09_exp3_TH	1	pyramidal	2	189	321.408	Point 35	523.959	532.022	332.666	no cnx
2019_08_09_exp3_TH	1	pyramidal	2	189	321.408	Point 34	558.334	465.321	332.666	no cnx
2019_08_09_exp3_TH	1	pyramidal	2	189	321.408	Point 5	598.582	-499.172	351.176	no cnx
2019_08_09_exp3_TH	1	pyramidal	2	189	321.408	Point 4	724.367	-489.352	357.056	no cnx
2019_08_09_exp3_TH	1	pyramidal	2	189	321.408	Point 7	712.802	-424.421	351.176	no cnx
2019_08_09_exp3_TH	1	pyramidal	2	189	321.408	Point 6	613.97	-460.348	351.176	no cnx
2019_08_09_exp3_TH	1	pyramidal	2	189	321.408	Point 1	558.912	-569.013	357.056	no cnx
2019_08_09_exp3_TH	1	pyramidal	2	189	321.408	Point 3	572.509	-529.932	357.056	no cnx
2019_08_09_exp3_TH	1	pyramidal	2	189	321.408	Point 2	627.674	-464.749	357.056	no cnx
2019_08_09_exp3_TH	1	pyramidal	2	189	321.408	Point 9	620.555	-426.796	340.776	no cnx
2019_08_09_exp3_TH	1	pyramidal	2	189	321.408	Point 8	612.983	-513.116	340.776	no cnx
2019_08_09_exp3_TH	1	pyramidal	2	189	321.408	Point 32	545.847	441.798	332.666	no cnx
2019_08_09_exp3_TH	1	pyramidal	2	189	321.408	Point 28	599.184	-571.899	322.966	no cnx
2019_08_09_exp3_TH	1	pyramidal	2	189	321.408	Point 29	511.853	-36.8011	375.296	excitatory
2019_08_09_exp3_TH	1	pyramidal	2	189	321.408	Point 20	562.307	-304.43	371.506	no cnx
2019_08_09_exp3_TH	1	pyramidal	2	189	321.408	Point 21	502.088	-246.433	371.506	no cnx
2019_08_09_exp3_TH	1	pyramidal	2	189	321.408	Point 22	595.216	-317.188	359.896	no cnx
2019_08_09_exp3_TH	1	pyramidal	2	189	321.408	Point 23	581.514	-423.198	359.896	no cnx
2019_08_09_exp3_TH	1	pyramidal	2	189	321.408	Point 24	624.853	-444.946	359.896	no cnx
2019_08_09_exp3_TH	1	pyramidal	2	189	321.408	Point 25	604.104	-460.09	359.896	no cnx
2019_08_09_exp3_TH	1	pyramidal	2	189	321.408	Point 26	613.869	-425.567	359.896	no cnx
2019_08_09_exp3_TH	1	pyramidal	2	189	321.408	Point 27	586.279	-539.718	322.966	no cnx
2019_08_09_exp3_TH	1	pyramidal	2	189	321.408	Point 33	592.637	497.773	332.666	no cnx
2019_08_09_exp3_TH	1	pyramidal	2	189	321.408	Point 38	473.94	441.958	316.776	no cnx
2019_08_09_exp2_TH	2	pyramidal	2	170	245.706	Point 51	739.927	-485.496	231.226	no cnx
2019_08_09_exp2_TH	2	pyramidal	2	170	245.706	Point 50	592.154	-279.668	231.226	no cnx
2019_08_09_exp2_TH	2	pyramidal	2	170	245.706	Point 52	615.037	-301.195	231.226	no cnx
2019_08_09_exp2_TH	2	pyramidal	2	170	245.706	Point 11	609.474	-604.644	229.966	no cnx
2019_08_09_exp2_TH	2	pyramidal	2	170	245.706	Point 10	680.136	-592.372	229.966	no cnx
2019_08_09_exp2_TH	2	pyramidal	2	170	245.706	Point 13	658.623	-491.926	229.966	no cnx
2019_08_09_exp2_TH	2	pyramidal	2	170	245.706	Point 12	744.857	-586.888	229.966	no cnx
2019_08_09_exp2_TH	2	pyramidal	2	170	245.706	Point 15	624.018	-480.934	229.966	no cnx
2019_08_09_exp2_TH	2	pyramidal	2	170	245.706	Point 14	670.163	-435.135	229.966	no cnx
2019_08_09_exp2_TH	2	pyramidal	2	170	245.706	Point 17	633.899	-547.779	221.816	no cnx
2019_08_09_exp2_TH	2	pyramidal	2	170	245.706	Point 16	776.109	-566.885	229.966	no cnx
2019_08_09_exp2_TH	2	pyramidal	2	170	245.706	Point 19	834.053	-637.775	221.816	no cnx
2019_08_09_exp2_TH	2	pyramidal	2	170	245.706	Point 18	671.199	-667.097	221.816	no cnx
2019_08_09_exp2_TH	2	pyramidal	2	170	245.706	Point 31	744.973	-563.369	221.596	no cnx
2019_08_09_exp2_TH	2	pyramidal	2	170	245.706	Point 30	649.545	-633.102	221.596	no cnx
2019_08_09_exp2_TH	2	pyramidal	2	170	245.706	Point 37	612.586	-738.623	221.596	no cnx
2019_08_09_exp2_TH	2	pyramidal	2	170	245.706	Point 36	727.812	-490.762	221.596	no cnx
2019_08_09_exp2_TH	2	pyramidal	2	170	245.706	Point 35	643.277	-723.98	221.596	no cnx
2019_08_09_exp2_TH	2	pyramidal	2	170	245.706	Point 34	679.377	-515.088	221.596	no cnx
2019_08_09_exp2_TH	2	pyramidal	2	170	245.706	Point 5	586.017	-457.373	249.206	no cnx
2019_08_09_exp2_TH	2	pyramidal	2	170	245.706	Point 4	652.863	-537.259	249.206	no cnx
2019_08_09_exp2_TH	2	pyramidal	2	170	245.706	Point 7	602.538	-596.876	249.206	no cnx
2019_08_09_exp2_TH	2	pyramidal	2	170	245.706	Point 6	715.218	-348.787	249.206	no cnx
2019_08_09_exp2_TH	2	pyramidal	2	170	245.706	Point 1	614.735	-519.23	249.206	no cnx
2019_08_09_exp2_TH	2	pyramidal	2	170	245.706	Point 3	550.247	-472.122	249.206	no cnx
2019_08_09_exp2_TH	2	pyramidal	2	170	245.706	Point 2	660.006	-392.326	249.206	no cnx
2019_08_09_exp2_TH	2	pyramidal	2	170	245.706	Point 9	778.707	-586.528	229.966	no cnx
2019_08_09_exp2_TH	2	pyramidal	2	170	245.706	Point 8	612.912	-470.327	249.206	no cnx
2019_08_09_exp2_TH	2	pyramidal	2	170	245.706	Point 32	630.133	-733.806	221.596	no cnx
2019_08_09_exp2_TH	2	pyramidal	2	170	245.706	Point 48	566.637	-450.873	231.226	no cnx
2019_08_09_exp2_TH	2	pyramidal	2	170	245.706	Point 49	512.24	-365.212	231.226	no cnx
2019_08_09_exp2_TH	2	pyramidal	2	170	245.706	Point 42	724.562	-566.199	221.886	no cnx
2019_08_09_exp2_TH	2	pyramidal	2	170	245.706	Point 43	746.385	-531.292	221.886	no cnx
2019_08_09_exp2_TH	2	pyramidal	2	170	245.706	Point 40	587.816	-745.896	221.886	no cnx
2019_08_09_exp2_TH	2	pyramidal	2	170	245.706	Point 41	707.46	-594.287	221.886	no cnx
2019_08_09_exp2_TH	2	pyramidal	2	170	245.706	Point 46	619.15	-547.831	221.886	no cnx
2019_08_09_exp2_TH	2	pyramidal	2	170	245.706	Point 47	674.098	-345.864	231.226	no cnx
2019_08_09_exp2_TH	2	pyramidal	2	170	245.706	Point 44	692.772	-577.925	221.886	no cnx
2019_08_09_exp2_TH	2	pyramidal	2	170	245.706	Point 45	592.862	-602.615	221.886	no cnx
2019_08_09_exp2_TH	2	pyramidal	2	170	245.706	Point 28	634.789	-689.705	221.596	no cnx
2019_08_09_exp2_TH	2	pyramidal	2	170	245.706	Point 29	746.37	-738.819	221.596	no cnx
2019_08_09_exp2_TH	2	pyramidal	2	170	245.706	Point 20	699.448	-525.467	221.816	no cnx
2019_08_09_exp2_TH	2	pyramidal	2	170	245.706	Point 21	799.367	-635.897	221.816	no cnx
2019_08_09_exp2_TH	2	pyramidal	2	170	245.706	Point 22	722.529	-457.871	221.816	no cnx
2019_08_09_exp2_TH	2	pyramidal	2	170	245.706	Point 23	722.398	-525.718	221.816	no cnx
2019_08_09_exp2_TH	2	pyramidal	2	170	245.706	Point 24	574.222	-548.008	221.816	no cnx
2019_08_09_exp2_TH	2	pyramidal	2	170	245.706	Point 25	613.112	-610.455	221.816	no cnx
2019_08_09_exp2_TH	2	pyramidal	2	170	245.706	Point 26	630.628	-639.344	221.816	no cnx
2019_08_09_exp2_TH	2	pyramidal	2	170	245.706	Point 27	658.598	-785.818	221.596	no cnx
2019_08_09_exp2_TH	2	pyramidal	2	170	245.706	Point 39	593.91	-771.541	221.886	no cnx
2019_08_09_exp2_TH	2	pyramidal	2	170	245.706	Point 33	661.018	-764.724	221.596	no cnx
2019_08_09_exp2_TH	2	pyramidal	2	170	245.706	Point 38	634.716	-795.027	221.886	no cnx
2019_08_09_exp2_TH	1	pyramidal	2	160	245.156	Point 51	731.122	-420.574	231.226	no cnx
2019_08_09_exp2_TH	1	pyramidal	2	160	245.156	Point 50	583.35	-214.746	231.226	no cnx
2019_08_09_exp2_TH	1	pyramidal	2	160	245.156	Point 52	606.232	-236.272	231.226	no cnx
2019_08_09_exp2_TH	1	pyramidal	2	160	245.156	Point 11	600.669	-539.722	229.966	no cnx
2019_08_09_exp2_TH	1	pyramidal	2	160	245.156	Point 10	671.331	-527.449	229.966	no cnx
2019_08_09_exp2_TH	1	pyramidal	2	160	245.156	Point 13	649.819	-427.003	229.966	no cnx
2019_08_09_exp2_TH	1	pyramidal	2	160	245.156	Point 12	736.052	-521.965	229.966	no cnx
2019_08_09_exp2_TH	1	pyramidal	2	160	245.156	Point 15	615.213	-416.011	229.966	no cnx
2019_08_09_exp2_TH	1	pyramidal	2	160	245.156	Point 14	661.359	-370.213	229.966	excitatory
2019_08_09_exp2_TH	1	pyramidal	2	160	245.156	Point 17	625.094	-482.856	221.816	no cnx
2019_08_09_exp2_TH	1	pyramidal	2	160	245.156	Point 16	767.305	-501.962	229.966	no cnx
2019_08_09_exp2_TH	1	pyramidal	2	160	245.156	Point 19	825.248	-572.852	221.816	no cnx
2019_08_09_exp2_TH	1	pyramidal	2	160	245.156	Point 18	662.394	-602.174	221.816	no cnx
2019_08_09_exp2_TH	1	pyramidal	2	160	245.156	Point 31	736.168	-498.447	221.596	no cnx
2019_08_09_exp2_TH	1	pyramidal	2	160	245.156	Point 30	640.74	-568.179	221.596	no cnx
2019_08_09_exp2_TH	1	pyramidal	2	160	245.156	Point 37	603.781	-673.7	221.596	no cnx
2019_08_09_exp2_TH	1	pyramidal	2	160	245.156	Point 36	719.008	-425.839	221.596	no cnx
2019_08_09_exp2_TH	1	pyramidal	2	160	245.156	Point 35	634.472	-659.057	221.596	no cnx
2019_08_09_exp2_TH	1	pyramidal	2	160	245.156	Point 34	670.573	-450.166	221.596	no cnx
2019_08_09_exp2_TH	1	pyramidal	2	160	245.156	Point 5	577.213	-392.45	249.206	no cnx
2019_08_09_exp2_TH	1	pyramidal	2	160	245.156	Point 4	644.059	-472.336	249.206	no cnx
2019_08_09_exp2_TH	1	pyramidal	2	160	245.156	Point 7	593.733	-531.954	249.206	no cnx
2019_08_09_exp2_TH	1	pyramidal	2	160	245.156	Point 6	706.414	-283.864	249.206	no cnx
2019_08_09_exp2_TH	1	pyramidal	2	160	245.156	Point 1	605.931	-454.307	249.206	no cnx
2019_08_09_exp2_TH	1	pyramidal	2	160	245.156	Point 3	541.442	-407.2	249.206	no cnx
2019_08_09_exp2_TH	1	pyramidal	2	160	245.156	Point 2	651.202	-327.403	249.206	excitatory
2019_08_09_exp2_TH	1	pyramidal	2	160	245.156	Point 9	769.902	-521.606	229.966	no cnx
2019_08_09_exp2_TH	1	pyramidal	2	160	245.156	Point 8	604.107	-405.404	249.206	no cnx
2019_08_09_exp2_TH	1	pyramidal	2	160	245.156	Point 32	621.329	-668.883	221.596	no cnx
2019_08_09_exp2_TH	1	pyramidal	2	160	245.156	Point 48	557.832	-385.951	231.226	no cnx
2019_08_09_exp2_TH	1	pyramidal	2	160	245.156	Point 49	503.435	-300.289	231.226	no cnx
2019_08_09_exp2_TH	1	pyramidal	2	160	245.156	Point 42	715.758	-501.276	221.886	no cnx
2019_08_09_exp2_TH	1	pyramidal	2	160	245.156	Point 43	737.58	-466.369	221.886	no cnx
2019_08_09_exp2_TH	1	pyramidal	2	160	245.156	Point 40	579.011	-680.973	221.886	no cnx
2019_08_09_exp2_TH	1	pyramidal	2	160	245.156	Point 41	698.655	-529.364	221.886	no cnx
2019_08_09_exp2_TH	1	pyramidal	2	160	245.156	Point 46	610.345	-482.909	221.886	no cnx
2019_08_09_exp2_TH	1	pyramidal	2	160	245.156	Point 47	665.293	-280.942	231.226	no cnx
2019_08_09_exp2_TH	1	pyramidal	2	160	245.156	Point 44	683.967	-513.002	221.886	no cnx
2019_08_09_exp2_TH	1	pyramidal	2	160	245.156	Point 45	584.057	-537.692	221.886	no cnx
2019_08_09_exp2_TH	1	pyramidal	2	160	245.156	Point 28	625.984	-624.782	221.596	no cnx
2019_08_09_exp2_TH	1	pyramidal	2	160	245.156	Point 29	737.565	-673.896	221.596	no cnx
2019_08_09_exp2_TH	1	pyramidal	2	160	245.156	Point 20	690.643	-460.545	221.816	no cnx
2019_08_09_exp2_TH	1	pyramidal	2	160	245.156	Point 21	790.562	-570.975	221.816	no cnx
2019_08_09_exp2_TH	1	pyramidal	2	160	245.156	Point 22	713.725	-392.948	221.816	excitatory
2019_08_09_exp2_TH	1	pyramidal	2	160	245.156	Point 23	713.593	-460.795	221.816	no cnx
2019_08_09_exp2_TH	1	pyramidal	2	160	245.156	Point 24	565.418	-483.085	221.816	no cnx
2019_08_09_exp2_TH	1	pyramidal	2	160	245.156	Point 25	604.307	-545.533	221.816	no cnx
2019_08_09_exp2_TH	1	pyramidal	2	160	245.156	Point 26	621.824	-574.421	221.816	no cnx
2019_08_09_exp2_TH	1	pyramidal	2	160	245.156	Point 27	649.793	-720.895	221.596	no cnx
2019_08_09_exp2_TH	1	pyramidal	2	160	245.156	Point 39	585.106	-706.618	221.886	no cnx
2019_08_09_exp2_TH	1	pyramidal	2	160	245.156	Point 33	652.213	-699.802	221.596	no cnx
2019_08_09_exp2_TH	1	pyramidal	2	160	245.156	Point 38	625.912	-730.104	221.886	no cnx
2019_08_09_exp1_TH	0	pyramidal	2	216	240.406	Point 5	629.757	-231.954	244.466	no cnx
2019_08_09_exp1_TH	0	pyramidal	2	216	240.406	Point 4	616.081	-253.611	244.466	no cnx
2019_08_09_exp1_TH	0	pyramidal	2	216	240.406	Point 7	673.744	-194.427	244.466	no cnx
2019_08_09_exp1_TH	0	pyramidal	2	216	240.406	Point 6	667.364	-81.6559	244.466	no cnx
2019_08_09_exp1_TH	0	pyramidal	2	216	240.406	Point 1	636.852	-273.444	244.466	no cnx
2019_08_09_exp1_TH	0	pyramidal	2	216	240.406	Point 3	724.571	-191.442	244.466	no cnx
2019_08_09_exp1_TH	0	pyramidal	2	216	240.406	Point 2	649.818	-149.382	244.466	no cnx
2019_08_09_exp1_TH	0	pyramidal	2	216	240.406	Point 8	685.654	-102.136	244.466	no cnx
2019_08_08_exp2_TH	0	pyramidal	2	253	318	Point 59	628.064	-751.159	204.676	no cnx
2019_08_08_exp2_TH	0	pyramidal	2	253	318	Point 58	589.617	-575.514	213.846	no cnx
2019_08_08_exp2_TH	0	pyramidal	2	253	318	Point 55	591.728	-677.96	213.846	no cnx
2019_08_08_exp2_TH	0	pyramidal	2	253	318	Point 54	636.031	-677.148	213.846	no cnx
2019_08_08_exp2_TH	0	pyramidal	2	253	318	Point 57	560.703	-604.827	213.846	no cnx
2019_08_08_exp2_TH	0	pyramidal	2	253	318	Point 56	634.309	-603.888	213.846	no cnx
2019_08_08_exp2_TH	0	pyramidal	2	253	318	Point 51	620.845	-682.047	218.006	no cnx
2019_08_08_exp2_TH	0	pyramidal	2	253	318	Point 50	617.687	-575.833	218.006	no cnx
2019_08_08_exp2_TH	0	pyramidal	2	253	318	Point 53	770.417	-572.548	213.846	no cnx
2019_08_08_exp2_TH	0	pyramidal	2	253	318	Point 52	740.303	-538.989	213.846	no cnx
2019_08_08_exp2_TH	0	pyramidal	2	253	318	Point 11	673.032	-609.417	244.216	no cnx
2019_08_08_exp2_TH	0	pyramidal	2	253	318	Point 10	591.993	-539.102	244.216	no cnx
2019_08_08_exp2_TH	0	pyramidal	2	253	318	Point 13	582.676	-621.004	244.216	no cnx
2019_08_08_exp2_TH	0	pyramidal	2	253	318	Point 12	743.073	-525.468	244.216	no cnx
2019_08_08_exp2_TH	0	pyramidal	2	253	318	Point 15	639.921	-612.592	244.216	no cnx
2019_08_08_exp2_TH	0	pyramidal	2	253	318	Point 14	717.554	-460.712	244.216	no cnx
2019_08_08_exp2_TH	0	pyramidal	2	253	318	Point 17	617.397	-606.36	244.216	no cnx
2019_08_08_exp2_TH	0	pyramidal	2	253	318	Point 16	623.245	-519.479	244.216	no cnx
2019_08_08_exp2_TH	0	pyramidal	2	253	318	Point 19	785.518	-548.917	229.806	no cnx
2019_08_08_exp2_TH	0	pyramidal	2	253	318	Point 18	643.288	-635.432	229.806	no cnx
2019_08_08_exp2_TH	0	pyramidal	2	253	318	Point 31	622.296	-450.014	240.266	no cnx
2019_08_08_exp2_TH	0	pyramidal	2	253	318	Point 30	593.407	-477.896	240.266	no cnx
2019_08_08_exp2_TH	0	pyramidal	2	253	318	Point 37	614.843	-299.022	248.656	no cnx
2019_08_08_exp2_TH	0	pyramidal	2	253	318	Point 36	573.23	-316.255	248.656	no cnx
2019_08_08_exp2_TH	0	pyramidal	2	253	318	Point 35	623.73	-557.598	248.656	no cnx
2019_08_08_exp2_TH	0	pyramidal	2	253	318	Point 34	592.239	-459.899	248.656	no cnx
2019_08_08_exp2_TH	0	pyramidal	2	253	318	Point 5	685.61	-453.911	251.636	no cnx
2019_08_08_exp2_TH	0	pyramidal	2	253	318	Point 4	694.396	-595.52	251.636	no cnx
2019_08_08_exp2_TH	0	pyramidal	2	253	318	Point 7	592.147	-599.643	251.636	no cnx
2019_08_08_exp2_TH	0	pyramidal	2	253	318	Point 6	644.418	-580.864	251.636	no cnx
2019_08_08_exp2_TH	0	pyramidal	2	253	318	Point 1	584.511	-569.561	251.636	no cnx
2019_08_08_exp2_TH	0	pyramidal	2	253	318	Point 3	619.481	-433.466	251.636	no cnx
2019_08_08_exp2_TH	0	pyramidal	2	253	318	Point 2	687.493	-518.859	251.636	no cnx
2019_08_08_exp2_TH	0	pyramidal	2	253	318	Point 9	611.302	-619.484	243.866	no cnx
2019_08_08_exp2_TH	0	pyramidal	2	253	318	Point 8	603.511	-673.941	243.866	no cnx
2019_08_08_exp2_TH	0	pyramidal	2	253	318	Point 32	613.797	-487.795	248.656	no cnx
2019_08_08_exp2_TH	0	pyramidal	2	253	318	Point 49	682.168	-674.32	218.006	no cnx
2019_08_08_exp2_TH	0	pyramidal	2	253	318	Point 42	616.28	-665.987	227.356	no cnx
2019_08_08_exp2_TH	0	pyramidal	2	253	318	Point 43	565.5	-658.552	227.356	no cnx
2019_08_08_exp2_TH	0	pyramidal	2	253	318	Point 40	633.694	-651.156	227.356	no cnx
2019_08_08_exp2_TH	0	pyramidal	2	253	318	Point 41	611.551	-757.187	227.356	no cnx
2019_08_08_exp2_TH	0	pyramidal	2	253	318	Point 46	576.124	-537.849	227.356	no cnx
2019_08_08_exp2_TH	0	pyramidal	2	253	318	Point 47	623.395	-722.115	218.006	no cnx
2019_08_08_exp2_TH	0	pyramidal	2	253	318	Point 44	739.971	-653.855	227.356	no cnx
2019_08_08_exp2_TH	0	pyramidal	2	253	318	Point 45	629.781	-728.965	227.356	no cnx
2019_08_08_exp2_TH	0	pyramidal	2	253	318	Point 28	624.422	-355.391	229.866	no cnx
2019_08_08_exp2_TH	0	pyramidal	2	253	318	Point 29	565.606	-432.998	240.266	no cnx
2019_08_08_exp2_TH	0	pyramidal	2	253	318	Point 66	725.893	-458.22	204.676	no cnx
2019_08_08_exp2_TH	0	pyramidal	2	253	318	Point 60	644.559	-673.164	204.676	no cnx
2019_08_08_exp2_TH	0	pyramidal	2	253	318	Point 61	593.477	-564.143	204.676	no cnx
2019_08_08_exp2_TH	0	pyramidal	2	253	318	Point 62	609.502	-715.105	204.676	no cnx
2019_08_08_exp2_TH	0	pyramidal	2	253	318	Point 63	689.084	-592.535	204.676	excitatory
2019_08_08_exp2_TH	0	pyramidal	2	253	318	Point 20	584.371	-602.044	229.806	no cnx
2019_08_08_exp2_TH	0	pyramidal	2	253	318	Point 21	604.971	-621.805	229.806	no cnx
2019_08_08_exp2_TH	0	pyramidal	2	253	318	Point 22	610.734	-599.136	229.806	no cnx
2019_08_08_exp2_TH	0	pyramidal	2	253	318	Point 23	688.613	-610.134	229.806	no cnx
2019_08_08_exp2_TH	0	pyramidal	2	253	318	Point 24	671.593	-473.708	229.866	no cnx
2019_08_08_exp2_TH	0	pyramidal	2	253	318	Point 25	764.55	-463.37	229.866	no cnx
2019_08_08_exp2_TH	0	pyramidal	2	253	318	Point 26	636.364	-447.22	229.866	no cnx
2019_08_08_exp2_TH	0	pyramidal	2	253	318	Point 27	601.744	-397.345	229.866	no cnx
2019_08_08_exp2_TH	0	pyramidal	2	253	318	Point 64	635.108	-743.532	204.676	no cnx
2019_08_08_exp2_TH	0	pyramidal	2	253	318	Point 65	602.844	-577.272	204.676	no cnx
2019_08_08_exp2_TH	0	pyramidal	2	253	318	Point 39	600.331	-422.532	248.656	no cnx
2019_08_08_exp2_TH	0	pyramidal	2	253	318	Point 33	726.853	-496.33	248.656	no cnx
2019_08_08_exp2_TH	0	pyramidal	2	253	318	Point 38	613.627	-502.655	248.656	no cnx
2019_08_08_exp1_TH	3	pyramidal	2	226	241.173	Point 5	656.156	249.925	236.456	no cnx
2019_08_08_exp1_TH	3	pyramidal	2	226	241.173	Point 4	513.672	71.8573	236.456	no cnx
2019_08_08_exp1_TH	3	pyramidal	2	226	241.173	Point 6	510.266	100.776	236.456	no cnx
2019_08_08_exp1_TH	3	pyramidal	2	226	241.173	Point 1	578.206	66.3692	236.456	no cnx
2019_08_08_exp1_TH	3	pyramidal	2	226	241.173	Point 3	570.963	273.843	236.456	no cnx
2019_08_08_exp1_TH	3	pyramidal	2	226	241.173	Point 2	489.304	159.57	236.456	no cnx
2019_08_08_exp1_TH	3	pyramidal	2	226	241.173	Point 8	488.705	74.6504	236.456	no cnx
2019_08_08_exp1_TH	1	pyramidal	2	217	240.486	Point 5	631.06	406.584	236.456	no cnx
2019_08_08_exp1_TH	1	pyramidal	2	217	240.486	Point 4	488.576	228.516	236.456	no cnx
2019_08_08_exp1_TH	1	pyramidal	2	217	240.486	Point 6	485.17	257.435	236.456	no cnx
2019_08_08_exp1_TH	1	pyramidal	2	217	240.486	Point 1	553.11	223.028	236.456	excitatory
2019_08_08_exp1_TH	1	pyramidal	2	217	240.486	Point 3	545.867	430.502	236.456	no cnx
2019_08_08_exp1_TH	1	pyramidal	2	217	240.486	Point 2	464.208	316.229	236.456	no cnx
2019_08_08_exp1_TH	1	pyramidal	2	217	240.486	Point 8	463.609	231.309	236.456	no cnx
2019_06_06_exp2_TH	3	pyramidal	2	231	564.995	Point 11	685.224	-389.271	626.585	no cnx
2019_06_06_exp2_TH	3	pyramidal	2	231	564.995	Point 10	531.147	-309.351	626.585	no cnx
2019_06_06_exp2_TH	3	pyramidal	2	231	564.995	Point 13	747.308	-307.855	626.585	no cnx
2019_06_06_exp2_TH	3	pyramidal	2	231	564.995	Point 12	533.004	-355.609	626.585	no cnx
2019_06_06_exp2_TH	3	pyramidal	2	231	564.995	Point 15	611.042	-315.773	626.585	no cnx
2019_06_06_exp2_TH	3	pyramidal	2	231	564.995	Point 14	702.861	-198.227	626.585	no cnx
2019_06_06_exp2_TH	3	pyramidal	2	231	564.995	Point 17	619.987	-147.424	626.585	no cnx
2019_06_06_exp2_TH	3	pyramidal	2	231	564.995	Point 16	565.313	-289.594	626.585	no cnx
2019_06_06_exp2_TH	3	pyramidal	2	231	564.995	Point 19	761.347	-298.458	626.585	no cnx
2019_06_06_exp2_TH	3	pyramidal	2	231	564.995	Point 18	686.007	-209.208	626.585	no cnx
2019_06_06_exp2_TH	3	pyramidal	2	231	564.995	Point 31	640.607	-326.104	619.755	no cnx
2019_06_06_exp2_TH	3	pyramidal	2	231	564.995	Point 30	591.495	-336.57	619.755	no cnx
2019_06_06_exp2_TH	3	pyramidal	2	231	564.995	Point 37	609.412	-295.523	609.425	no cnx
2019_06_06_exp2_TH	3	pyramidal	2	231	564.995	Point 36	567.349	-191.865	609.425	no cnx
2019_06_06_exp2_TH	3	pyramidal	2	231	564.995	Point 35	637.577	-310.233	609.425	no cnx
2019_06_06_exp2_TH	3	pyramidal	2	231	564.995	Point 34	535.757	-291.587	609.425	no cnx
2019_06_06_exp2_TH	3	pyramidal	2	231	564.995	Point 5	490.943	-46.4399	634.855	no cnx
2019_06_06_exp2_TH	3	pyramidal	2	231	564.995	Point 4	600.262	-266.315	634.855	no cnx
2019_06_06_exp2_TH	3	pyramidal	2	231	564.995	Point 7	703.686	-122.634	634.855	no cnx
2019_06_06_exp2_TH	3	pyramidal	2	231	564.995	Point 6	561.415	-149.699	634.855	no cnx
2019_06_06_exp2_TH	3	pyramidal	2	231	564.995	Point 1	523.545	-28.354	634.855	no cnx
2019_06_06_exp2_TH	3	pyramidal	2	231	564.995	Point 3	547.563	-29.8254	634.855	no cnx
2019_06_06_exp2_TH	3	pyramidal	2	231	564.995	Point 2	600.147	-218.866	634.855	no cnx
2019_06_06_exp2_TH	3	pyramidal	2	231	564.995	Point 9	588.753	-239.421	626.585	no cnx
2019_06_06_exp2_TH	3	pyramidal	2	231	564.995	Point 8	625.973	-186.914	634.855	no cnx
2019_06_06_exp2_TH	3	pyramidal	2	231	564.995	Point 32	580.809	-283.47	619.755	no cnx
2019_06_06_exp2_TH	3	pyramidal	2	231	564.995	Point 48	632.6	-415.175	671.825	no cnx
2019_06_06_exp2_TH	3	pyramidal	2	231	564.995	Point 42	571.873	-292.824	671.825	excitatory
2019_06_06_exp2_TH	3	pyramidal	2	231	564.995	Point 43	559.915	-367.886	671.825	no cnx
2019_06_06_exp2_TH	3	pyramidal	2	231	564.995	Point 40	621.45	-360.612	609.425	no cnx
2019_06_06_exp2_TH	3	pyramidal	2	231	564.995	Point 46	558.991	-296.438	671.825	no cnx
2019_06_06_exp2_TH	3	pyramidal	2	231	564.995	Point 47	615.374	-334.761	671.825	no cnx
2019_06_06_exp2_TH	3	pyramidal	2	231	564.995	Point 44	592.396	-291.359	671.825	no cnx
2019_06_06_exp2_TH	3	pyramidal	2	231	564.995	Point 45	581.615	-430.824	671.825	no cnx
2019_06_06_exp2_TH	3	pyramidal	2	231	564.995	Point 28	563.313	-294.947	619.755	no cnx
2019_06_06_exp2_TH	3	pyramidal	2	231	564.995	Point 29	557.304	-208.949	619.755	no cnx
2019_06_06_exp2_TH	3	pyramidal	2	231	564.995	Point 20	615.516	-300.421	626.585	no cnx
2019_06_06_exp2_TH	3	pyramidal	2	231	564.995	Point 21	602.097	-385.702	626.585	no cnx
2019_06_06_exp2_TH	3	pyramidal	2	231	564.995	Point 22	695.054	-297.556	619.755	no cnx
2019_06_06_exp2_TH	3	pyramidal	2	231	564.995	Point 23	749.217	-261.321	619.755	no cnx
2019_06_06_exp2_TH	3	pyramidal	2	231	564.995	Point 24	604.255	-175.45	619.755	no cnx
2019_06_06_exp2_TH	3	pyramidal	2	231	564.995	Point 25	675.645	-270.953	619.755	no cnx
2019_06_06_exp2_TH	3	pyramidal	2	231	564.995	Point 26	617.829	-354.826	619.755	no cnx
2019_06_06_exp2_TH	3	pyramidal	2	231	564.995	Point 27	597.816	-296.855	619.755	excitatory
2019_06_06_exp2_TH	3	pyramidal	2	231	564.995	Point 39	567.902	-420.235	609.425	no cnx
2019_06_06_exp2_TH	3	pyramidal	2	231	564.995	Point 33	574.507	-198.602	619.755	no cnx
2019_06_06_exp2_TH	3	pyramidal	2	231	564.995	Point 38	709.951	-242.854	609.425	no cnx
2019_06_06_exp2_TH	1	pyramidal	2	251	598.665	Point 11	686.913	-266.507	626.585	no cnx
2019_06_06_exp2_TH	1	pyramidal	2	251	598.665	Point 10	532.836	-186.588	626.585	no cnx
2019_06_06_exp2_TH	1	pyramidal	2	251	598.665	Point 13	748.997	-185.092	626.585	excitatory
2019_06_06_exp2_TH	1	pyramidal	2	251	598.665	Point 12	534.693	-232.845	626.585	no cnx
2019_06_06_exp2_TH	1	pyramidal	2	251	598.665	Point 15	612.731	-193.009	626.585	no cnx
2019_06_06_exp2_TH	1	pyramidal	2	251	598.665	Point 14	704.551	-75.4635	626.585	excitatory
2019_06_06_exp2_TH	1	pyramidal	2	251	598.665	Point 17	621.676	-24.6602	626.585	no cnx
2019_06_06_exp2_TH	1	pyramidal	2	251	598.665	Point 16	567.002	-166.83	626.585	excitatory
2019_06_06_exp2_TH	1	pyramidal	2	251	598.665	Point 19	763.037	-175.694	626.585	no cnx
2019_06_06_exp2_TH	1	pyramidal	2	251	598.665	Point 18	687.696	-86.4444	626.585	no cnx
2019_06_06_exp2_TH	1	pyramidal	2	251	598.665	Point 31	642.296	-203.34	619.755	no cnx
2019_06_06_exp2_TH	1	pyramidal	2	251	598.665	Point 30	593.185	-213.806	619.755	no cnx
2019_06_06_exp2_TH	1	pyramidal	2	251	598.665	Point 37	611.101	-172.76	609.425	excitatory
2019_06_06_exp2_TH	1	pyramidal	2	251	598.665	Point 36	569.038	-69.1011	609.425	no cnx
2019_06_06_exp2_TH	1	pyramidal	2	251	598.665	Point 35	639.266	-187.47	609.425	no cnx
2019_06_06_exp2_TH	1	pyramidal	2	251	598.665	Point 34	537.446	-168.823	609.425	no cnx
2019_06_06_exp2_TH	1	pyramidal	2	251	598.665	Point 5	492.632	76.3238	634.855	no cnx
2019_06_06_exp2_TH	1	pyramidal	2	251	598.665	Point 4	601.952	-143.551	634.855	no cnx
2019_06_06_exp2_TH	1	pyramidal	2	251	598.665	Point 7	705.375	0.129853	634.855	no cnx
2019_06_06_exp2_TH	1	pyramidal	2	251	598.665	Point 6	563.104	-26.9353	634.855	no cnx
2019_06_06_exp2_TH	1	pyramidal	2	251	598.665	Point 1	525.234	94.4096	634.855	no cnx
2019_06_06_exp2_TH	1	pyramidal	2	251	598.665	Point 3	549.252	92.9383	634.855	no cnx
2019_06_06_exp2_TH	1	pyramidal	2	251	598.665	Point 2	601.836	-96.1021	634.855	no cnx
2019_06_06_exp2_TH	1	pyramidal	2	251	598.665	Point 9	590.442	-116.657	626.585	no cnx
2019_06_06_exp2_TH	1	pyramidal	2	251	598.665	Point 8	627.662	-64.1508	634.855	no cnx
2019_06_06_exp2_TH	1	pyramidal	2	251	598.665	Point 32	582.498	-160.706	619.755	no cnx
2019_06_06_exp2_TH	1	pyramidal	2	251	598.665	Point 48	634.289	-292.412	671.825	excitatory
2019_06_06_exp2_TH	1	pyramidal	2	251	598.665	Point 42	573.562	-170.06	671.825	no cnx
2019_06_06_exp2_TH	1	pyramidal	2	251	598.665	Point 43	561.604	-245.122	671.825	no cnx
2019_06_06_exp2_TH	1	pyramidal	2	251	598.665	Point 40	623.14	-237.848	609.425	no cnx
2019_06_06_exp2_TH	1	pyramidal	2	251	598.665	Point 46	560.68	-173.674	671.825	no cnx
2019_06_06_exp2_TH	1	pyramidal	2	251	598.665	Point 47	617.063	-211.997	671.825	no cnx
2019_06_06_exp2_TH	1	pyramidal	2	251	598.665	Point 44	594.085	-168.596	671.825	no cnx
2019_06_06_exp2_TH	1	pyramidal	2	251	598.665	Point 45	583.304	-308.06	671.825	no cnx
2019_06_06_exp2_TH	1	pyramidal	2	251	598.665	Point 28	565.002	-172.183	619.755	excitatory
2019_06_06_exp2_TH	1	pyramidal	2	251	598.665	Point 29	558.993	-86.1853	619.755	no cnx
2019_06_06_exp2_TH	1	pyramidal	2	251	598.665	Point 20	617.205	-177.658	626.585	excitatory
2019_06_06_exp2_TH	1	pyramidal	2	251	598.665	Point 21	603.786	-262.939	626.585	no cnx
2019_06_06_exp2_TH	1	pyramidal	2	251	598.665	Point 22	696.743	-174.792	619.755	no cnx
2019_06_06_exp2_TH	1	pyramidal	2	251	598.665	Point 23	750.906	-138.557	619.755	no cnx
2019_06_06_exp2_TH	1	pyramidal	2	251	598.665	Point 24	605.944	-52.6863	619.755	no cnx
2019_06_06_exp2_TH	1	pyramidal	2	251	598.665	Point 25	677.334	-148.189	619.755	no cnx
2019_06_06_exp2_TH	1	pyramidal	2	251	598.665	Point 26	619.518	-232.062	619.755	no cnx
2019_06_06_exp2_TH	1	pyramidal	2	251	598.665	Point 27	599.505	-174.091	619.755	no cnx
2019_06_06_exp2_TH	1	pyramidal	2	251	598.665	Point 39	569.592	-297.472	609.425	excitatory
2019_06_06_exp2_TH	1	pyramidal	2	251	598.665	Point 33	576.196	-75.8384	619.755	no cnx
2019_06_06_exp2_TH	1	pyramidal	2	251	598.665	Point 38	711.641	-120.09	609.425	no cnx
2019_06_06_exp1_TH	3	pyramidal	2	223	484.555	Point 50	715.185	-144.223	540.615	excitatory
2019_06_06_exp1_TH	3	pyramidal	2	223	484.555	Point 11	709.589	17.8316	563.725	no cnx
2019_06_06_exp1_TH	3	pyramidal	2	223	484.555	Point 10	668.596	-169.799	549.785	no cnx
2019_06_06_exp1_TH	3	pyramidal	2	223	484.555	Point 13	643.8	-105.578	563.725	no cnx
2019_06_06_exp1_TH	3	pyramidal	2	223	484.555	Point 12	684.861	-57.582	563.725	no cnx
2019_06_06_exp1_TH	3	pyramidal	2	223	484.555	Point 15	707.822	-40.0868	563.725	no cnx
2019_06_06_exp1_TH	3	pyramidal	2	223	484.555	Point 14	695.584	-65.1353	563.725	no cnx
2019_06_06_exp1_TH	3	pyramidal	2	223	484.555	Point 17	535.791	-56.1757	563.725	no cnx
2019_06_06_exp1_TH	3	pyramidal	2	223	484.555	Point 16	685.235	-102.415	563.725	no cnx
2019_06_06_exp1_TH	3	pyramidal	2	223	484.555	Point 19	585.92	-7.07827	552.275	no cnx
2019_06_06_exp1_TH	3	pyramidal	2	223	484.555	Point 18	673.53	-10.9908	552.275	no cnx
2019_06_06_exp1_TH	3	pyramidal	2	223	484.555	Point 31	686.579	-75.8961	538.575	no cnx
2019_06_06_exp1_TH	3	pyramidal	2	223	484.555	Point 30	709.45	-60.1277	547.645	no cnx
2019_06_06_exp1_TH	3	pyramidal	2	223	484.555	Point 37	696.637	-0.207237	538.575	no cnx
2019_06_06_exp1_TH	3	pyramidal	2	223	484.555	Point 36	576.003	-119.796	538.575	no cnx
2019_06_06_exp1_TH	3	pyramidal	2	223	484.555	Point 35	751.802	-234.137	538.575	no cnx
2019_06_06_exp1_TH	3	pyramidal	2	223	484.555	Point 34	630.267	-157.56	538.575	no cnx
2019_06_06_exp1_TH	3	pyramidal	2	223	484.555	Point 5	556.406	-139.857	549.785	no cnx
2019_06_06_exp1_TH	3	pyramidal	2	223	484.555	Point 4	729.758	-144.209	554.375	no cnx
2019_06_06_exp1_TH	3	pyramidal	2	223	484.555	Point 7	706.633	-145.057	549.785	no cnx
2019_06_06_exp1_TH	3	pyramidal	2	223	484.555	Point 6	615.418	-163.981	549.785	no cnx
2019_06_06_exp1_TH	3	pyramidal	2	223	484.555	Point 1	693.134	-233.95	549.765	no cnx
2019_06_06_exp1_TH	3	pyramidal	2	223	484.555	Point 3	568.095	-138.424	549.785	no cnx
2019_06_06_exp1_TH	3	pyramidal	2	223	484.555	Point 2	547.979	-208.383	549.785	no cnx
2019_06_06_exp1_TH	3	pyramidal	2	223	484.555	Point 9	669.068	-211.412	549.785	no cnx
2019_06_06_exp1_TH	3	pyramidal	2	223	484.555	Point 8	588.356	-142.996	549.785	no cnx
2019_06_06_exp1_TH	3	pyramidal	2	223	484.555	Point 32	568.817	-172.901	538.575	no cnx
2019_06_06_exp1_TH	3	pyramidal	2	223	484.555	Point 48	703.684	-97.1022	536.405	no cnx
2019_06_06_exp1_TH	3	pyramidal	2	223	484.555	Point 49	731.483	-158.979	540.615	no cnx
2019_06_06_exp1_TH	3	pyramidal	2	223	484.555	Point 42	706.519	-179.407	536.405	excitatory
2019_06_06_exp1_TH	3	pyramidal	2	223	484.555	Point 43	493.504	-195.329	536.405	no cnx
2019_06_06_exp1_TH	3	pyramidal	2	223	484.555	Point 40	595.579	-172.491	545.575	no cnx
2019_06_06_exp1_TH	3	pyramidal	2	223	484.555	Point 41	659.551	-78.2941	536.405	no cnx
2019_06_06_exp1_TH	3	pyramidal	2	223	484.555	Point 46	497.916	-152.159	536.405	no cnx
2019_06_06_exp1_TH	3	pyramidal	2	223	484.555	Point 47	532.428	-81.2364	536.405	no cnx
2019_06_06_exp1_TH	3	pyramidal	2	223	484.555	Point 44	634.597	-250.954	536.405	no cnx
2019_06_06_exp1_TH	3	pyramidal	2	223	484.555	Point 45	557.969	-233.815	536.405	no cnx
2019_06_06_exp1_TH	3	pyramidal	2	223	484.555	Point 28	616.517	-45.72	547.645	no cnx
2019_06_06_exp1_TH	3	pyramidal	2	223	484.555	Point 29	759.723	-35.9191	547.645	no cnx
2019_06_06_exp1_TH	3	pyramidal	2	223	484.555	Point 20	562.821	-80.9317	552.275	no cnx
2019_06_06_exp1_TH	3	pyramidal	2	223	484.555	Point 21	592.994	-60.5935	552.275	no cnx
2019_06_06_exp1_TH	3	pyramidal	2	223	484.555	Point 22	499.802	106.856	552.275	no cnx
2019_06_06_exp1_TH	3	pyramidal	2	223	484.555	Point 23	531.688	-14.1368	552.275	no cnx
2019_06_06_exp1_TH	3	pyramidal	2	223	484.555	Point 24	534.781	118.958	552.275	no cnx
2019_06_06_exp1_TH	3	pyramidal	2	223	484.555	Point 25	722.677	-32.0798	552.275	no cnx
2019_06_06_exp1_TH	3	pyramidal	2	223	484.555	Point 26	560.138	114.944	552.275	no cnx
2019_06_06_exp1_TH	3	pyramidal	2	223	484.555	Point 27	555.287	-1.73913	547.645	no cnx
2019_06_06_exp1_TH	3	pyramidal	2	223	484.555	Point 39	632.128	-272.118	538.575	no cnx
2019_06_06_exp1_TH	3	pyramidal	2	223	484.555	Point 33	685.678	-121.028	538.575	no cnx
2019_06_06_exp1_TH	3	pyramidal	2	223	484.555	Point 38	551.612	-153.734	538.575	no cnx
2019_06_06_exp1_TH	1	pyramidal	2	243	522.355	Point 50	714.974	67.2953	540.615	no cnx
2019_06_06_exp1_TH	1	pyramidal	2	243	522.355	Point 11	709.378	229.349	563.725	no cnx
2019_06_06_exp1_TH	1	pyramidal	2	243	522.355	Point 10	668.386	41.7189	549.785	no cnx
2019_06_06_exp1_TH	1	pyramidal	2	243	522.355	Point 13	643.589	105.94	563.725	no cnx
2019_06_06_exp1_TH	1	pyramidal	2	243	522.355	Point 12	684.651	153.936	563.725	no cnx
2019_06_06_exp1_TH	1	pyramidal	2	243	522.355	Point 15	707.612	171.431	563.725	no cnx
2019_06_06_exp1_TH	1	pyramidal	2	243	522.355	Point 14	695.373	146.383	563.725	no cnx
2019_06_06_exp1_TH	1	pyramidal	2	243	522.355	Point 17	535.58	155.342	563.725	no cnx
2019_06_06_exp1_TH	1	pyramidal	2	243	522.355	Point 16	685.024	109.102	563.725	no cnx
2019_06_06_exp1_TH	1	pyramidal	2	243	522.355	Point 19	585.709	204.44	552.275	no cnx
2019_06_06_exp1_TH	1	pyramidal	2	243	522.355	Point 18	673.32	200.527	552.275	no cnx
2019_06_06_exp1_TH	1	pyramidal	2	243	522.355	Point 31	686.368	135.622	538.575	no cnx
2019_06_06_exp1_TH	1	pyramidal	2	243	522.355	Point 30	709.24	151.39	547.645	no cnx
2019_06_06_exp1_TH	1	pyramidal	2	243	522.355	Point 37	696.426	211.311	538.575	no cnx
2019_06_06_exp1_TH	1	pyramidal	2	243	522.355	Point 36	575.792	91.7222	538.575	no cnx
2019_06_06_exp1_TH	1	pyramidal	2	243	522.355	Point 35	751.591	-22.6194	538.575	no cnx
2019_06_06_exp1_TH	1	pyramidal	2	243	522.355	Point 34	630.056	53.9581	538.575	no cnx
2019_06_06_exp1_TH	1	pyramidal	2	243	522.355	Point 5	556.196	71.6606	549.785	no cnx
2019_06_06_exp1_TH	1	pyramidal	2	243	522.355	Point 4	729.547	67.3084	554.375	no cnx
2019_06_06_exp1_TH	1	pyramidal	2	243	522.355	Point 7	706.422	66.4612	549.785	no cnx
2019_06_06_exp1_TH	1	pyramidal	2	243	522.355	Point 6	615.207	47.5364	549.785	no cnx
2019_06_06_exp1_TH	1	pyramidal	2	243	522.355	Point 1	692.924	-22.4317	549.765	no cnx
2019_06_06_exp1_TH	1	pyramidal	2	243	522.355	Point 3	567.885	73.0938	549.785	no cnx
2019_06_06_exp1_TH	1	pyramidal	2	243	522.355	Point 2	547.769	3.13433	549.785	no cnx
2019_06_06_exp1_TH	1	pyramidal	2	243	522.355	Point 9	668.857	0.105601	549.785	no cnx
2019_06_06_exp1_TH	1	pyramidal	2	243	522.355	Point 8	588.146	68.5214	549.785	no cnx
2019_06_06_exp1_TH	1	pyramidal	2	243	522.355	Point 32	568.607	38.6173	538.575	no cnx
2019_06_06_exp1_TH	1	pyramidal	2	243	522.355	Point 48	703.474	114.416	536.405	no cnx
2019_06_06_exp1_TH	1	pyramidal	2	243	522.355	Point 49	731.272	52.5388	540.615	no cnx
2019_06_06_exp1_TH	1	pyramidal	2	243	522.355	Point 42	706.308	32.1108	536.405	excitatory
2019_06_06_exp1_TH	1	pyramidal	2	243	522.355	Point 43	493.293	16.1889	536.405	no cnx
2019_06_06_exp1_TH	1	pyramidal	2	243	522.355	Point 40	595.368	39.0265	545.575	no cnx
2019_06_06_exp1_TH	1	pyramidal	2	243	522.355	Point 41	659.341	133.224	536.405	no cnx
2019_06_06_exp1_TH	1	pyramidal	2	243	522.355	Point 46	497.705	59.3583	536.405	no cnx
2019_06_06_exp1_TH	1	pyramidal	2	243	522.355	Point 47	532.217	130.281	536.405	no cnx
2019_06_06_exp1_TH	1	pyramidal	2	243	522.355	Point 44	634.387	-39.4366	536.405	no cnx
2019_06_06_exp1_TH	1	pyramidal	2	243	522.355	Point 45	557.758	-22.2976	536.405	no cnx
2019_06_06_exp1_TH	1	pyramidal	2	243	522.355	Point 28	616.306	165.798	547.645	no cnx
2019_06_06_exp1_TH	1	pyramidal	2	243	522.355	Point 29	759.513	175.599	547.645	no cnx
2019_06_06_exp1_TH	1	pyramidal	2	243	522.355	Point 20	562.611	130.586	552.275	no cnx
2019_06_06_exp1_TH	1	pyramidal	2	243	522.355	Point 21	592.783	150.924	552.275	no cnx
2019_06_06_exp1_TH	1	pyramidal	2	243	522.355	Point 22	499.592	318.374	552.275	no cnx
2019_06_06_exp1_TH	1	pyramidal	2	243	522.355	Point 23	531.478	197.381	552.275	no cnx
2019_06_06_exp1_TH	1	pyramidal	2	243	522.355	Point 24	534.57	330.476	552.275	no cnx
2019_06_06_exp1_TH	1	pyramidal	2	243	522.355	Point 25	722.467	179.438	552.275	no cnx
2019_06_06_exp1_TH	1	pyramidal	2	243	522.355	Point 26	559.927	326.461	552.275	no cnx
2019_06_06_exp1_TH	1	pyramidal	2	243	522.355	Point 27	555.076	209.779	547.645	no cnx
2019_06_06_exp1_TH	1	pyramidal	2	243	522.355	Point 39	631.917	-60.6006	538.575	no cnx
2019_06_06_exp1_TH	1	pyramidal	2	243	522.355	Point 33	685.468	90.4902	538.575	no cnx
2019_06_06_exp1_TH	1	pyramidal	2	243	522.355	Point 38	551.402	57.7837	538.575	no cnx
2019_06_06_exp1_TH	0	pyramidal	2	240	500.005	Point 50	715.462	152.684	540.615	excitatory
2019_06_06_exp1_TH	0	pyramidal	2	240	500.005	Point 11	709.866	314.738	563.725	no cnx
2019_06_06_exp1_TH	0	pyramidal	2	240	500.005	Point 10	668.873	127.107	549.785	no cnx
2019_06_06_exp1_TH	0	pyramidal	2	240	500.005	Point 13	644.077	191.328	563.725	no cnx
2019_06_06_exp1_TH	0	pyramidal	2	240	500.005	Point 12	685.138	239.324	563.725	no cnx
2019_06_06_exp1_TH	0	pyramidal	2	240	500.005	Point 15	708.099	256.82	563.725	no cnx
2019_06_06_exp1_TH	0	pyramidal	2	240	500.005	Point 14	695.861	231.771	563.725	no cnx
2019_06_06_exp1_TH	0	pyramidal	2	240	500.005	Point 17	536.068	240.731	563.725	no cnx
2019_06_06_exp1_TH	0	pyramidal	2	240	500.005	Point 16	685.512	194.491	563.725	no cnx
2019_06_06_exp1_TH	0	pyramidal	2	240	500.005	Point 19	586.197	289.828	552.275	no cnx
2019_06_06_exp1_TH	0	pyramidal	2	240	500.005	Point 18	673.807	285.916	552.275	no cnx
2019_06_06_exp1_TH	0	pyramidal	2	240	500.005	Point 31	686.856	221.01	538.575	no cnx
2019_06_06_exp1_TH	0	pyramidal	2	240	500.005	Point 30	709.727	236.779	547.645	no cnx
2019_06_06_exp1_TH	0	pyramidal	2	240	500.005	Point 37	696.914	296.699	538.575	no cnx
2019_06_06_exp1_TH	0	pyramidal	2	240	500.005	Point 36	576.28	177.111	538.575	no cnx
2019_06_06_exp1_TH	0	pyramidal	2	240	500.005	Point 35	752.079	62.7691	538.575	no cnx
2019_06_06_exp1_TH	0	pyramidal	2	240	500.005	Point 34	630.544	139.347	538.575	no cnx
2019_06_06_exp1_TH	0	pyramidal	2	240	500.005	Point 5	556.683	157.049	549.785	no cnx
2019_06_06_exp1_TH	0	pyramidal	2	240	500.005	Point 4	730.035	152.697	554.375	excitatory
2019_06_06_exp1_TH	0	pyramidal	2	240	500.005	Point 7	706.91	151.85	549.785	no cnx
2019_06_06_exp1_TH	0	pyramidal	2	240	500.005	Point 6	615.695	132.925	549.785	excitatory
2019_06_06_exp1_TH	0	pyramidal	2	240	500.005	Point 1	693.411	62.9568	549.765	no cnx
2019_06_06_exp1_TH	0	pyramidal	2	240	500.005	Point 3	568.372	158.482	549.785	no cnx
2019_06_06_exp1_TH	0	pyramidal	2	240	500.005	Point 2	548.256	88.5228	549.785	no cnx
2019_06_06_exp1_TH	0	pyramidal	2	240	500.005	Point 9	669.345	85.4941	549.785	no cnx
2019_06_06_exp1_TH	0	pyramidal	2	240	500.005	Point 8	588.633	153.91	549.785	no cnx
2019_06_06_exp1_TH	0	pyramidal	2	240	500.005	Point 32	569.094	124.006	538.575	no cnx
2019_06_06_exp1_TH	0	pyramidal	2	240	500.005	Point 48	703.961	199.804	536.405	no cnx
2019_06_06_exp1_TH	0	pyramidal	2	240	500.005	Point 49	731.76	137.927	540.615	no cnx
2019_06_06_exp1_TH	0	pyramidal	2	240	500.005	Point 42	706.796	117.499	536.405	no cnx
2019_06_06_exp1_TH	0	pyramidal	2	240	500.005	Point 43	493.781	101.577	536.405	no cnx
2019_06_06_exp1_TH	0	pyramidal	2	240	500.005	Point 40	595.856	124.415	545.575	excitatory
2019_06_06_exp1_TH	0	pyramidal	2	240	500.005	Point 41	659.828	218.612	536.405	no cnx
2019_06_06_exp1_TH	0	pyramidal	2	240	500.005	Point 46	498.193	144.747	536.405	no cnx
2019_06_06_exp1_TH	0	pyramidal	2	240	500.005	Point 47	532.705	215.67	536.405	no cnx
2019_06_06_exp1_TH	0	pyramidal	2	240	500.005	Point 44	634.874	45.9519	536.405	no cnx
2019_06_06_exp1_TH	0	pyramidal	2	240	500.005	Point 45	558.246	63.0909	536.405	no cnx
2019_06_06_exp1_TH	0	pyramidal	2	240	500.005	Point 28	616.794	251.186	547.645	no cnx
2019_06_06_exp1_TH	0	pyramidal	2	240	500.005	Point 29	760	260.987	547.645	no cnx
2019_06_06_exp1_TH	0	pyramidal	2	240	500.005	Point 20	563.098	215.975	552.275	no cnx
2019_06_06_exp1_TH	0	pyramidal	2	240	500.005	Point 21	593.271	236.313	552.275	no cnx
2019_06_06_exp1_TH	0	pyramidal	2	240	500.005	Point 22	500.079	403.762	552.275	no cnx
2019_06_06_exp1_TH	0	pyramidal	2	240	500.005	Point 23	531.965	282.77	552.275	no cnx
2019_06_06_exp1_TH	0	pyramidal	2	240	500.005	Point 24	535.058	415.864	552.275	no cnx
2019_06_06_exp1_TH	0	pyramidal	2	240	500.005	Point 25	722.954	264.826	552.275	no cnx
2019_06_06_exp1_TH	0	pyramidal	2	240	500.005	Point 26	560.415	411.85	552.275	no cnx
2019_06_06_exp1_TH	0	pyramidal	2	240	500.005	Point 27	555.564	295.167	547.645	no cnx
2019_06_06_exp1_TH	0	pyramidal	2	240	500.005	Point 39	632.405	24.7879	538.575	no cnx
2019_06_06_exp1_TH	0	pyramidal	2	240	500.005	Point 33	685.955	175.879	538.575	no cnx
2019_06_06_exp1_TH	0	pyramidal	2	240	500.005	Point 38	551.889	143.172	538.575	no cnx
2019_03_14_exp1_TH	3	pyramidal	2	187	231.745	Point 11	524.32	84.7592	186.375	no cnx
2019_03_14_exp1_TH	3	pyramidal	2	187	231.745	Point 10	508.691	118.28	191.755	no cnx
2019_03_14_exp1_TH	3	pyramidal	2	187	231.745	Point 13	515.075	45.5506	186.375	no cnx
2019_03_14_exp1_TH	3	pyramidal	2	187	231.745	Point 12	500.206	77.7887	186.375	no cnx
2019_03_14_exp1_TH	3	pyramidal	2	187	231.745	Point 15	516.04	129.757	180.715	no cnx
2019_03_14_exp1_TH	3	pyramidal	2	187	231.745	Point 14	526.735	187.991	180.715	no cnx
2019_03_14_exp1_TH	3	pyramidal	2	187	231.745	Point 17	525.096	134.973	180.715	no cnx
2019_03_14_exp1_TH	3	pyramidal	2	187	231.745	Point 16	504.433	183.488	180.715	no cnx
2019_03_14_exp1_TH	3	pyramidal	2	187	231.745	Point 19	537.153	155.646	180.715	no cnx
2019_03_14_exp1_TH	3	pyramidal	2	187	231.745	Point 18	511.829	165.898	180.715	no cnx
2019_03_14_exp1_TH	3	pyramidal	2	187	231.745	Point 31	639.467	-27.4374	234.595	no cnx
2019_03_14_exp1_TH	3	pyramidal	2	187	231.745	Point 30	529.096	-77.7311	222.535	no cnx
2019_03_14_exp1_TH	3	pyramidal	2	187	231.745	Point 37	561.349	19.9031	244.415	no cnx
2019_03_14_exp1_TH	3	pyramidal	2	187	231.745	Point 36	521.985	21.9896	244.415	no cnx
2019_03_14_exp1_TH	3	pyramidal	2	187	231.745	Point 35	480.241	25.1857	244.415	no cnx
2019_03_14_exp1_TH	3	pyramidal	2	187	231.745	Point 34	561.336	-73.2754	234.595	no cnx
2019_03_14_exp1_TH	3	pyramidal	2	187	231.745	Point 5	588.139	74.6549	200.755	no cnx
2019_03_14_exp1_TH	3	pyramidal	2	187	231.745	Point 4	541.395	66.1751	200.755	no cnx
2019_03_14_exp1_TH	3	pyramidal	2	187	231.745	Point 7	483.075	183.373	191.755	no cnx
2019_03_14_exp1_TH	3	pyramidal	2	187	231.745	Point 6	628.214	177.394	200.755	no cnx
2019_03_14_exp1_TH	3	pyramidal	2	187	231.745	Point 1	528.505	178.433	200.755	no cnx
2019_03_14_exp1_TH	3	pyramidal	2	187	231.745	Point 3	527.891	206.896	200.755	no cnx
2019_03_14_exp1_TH	3	pyramidal	2	187	231.745	Point 2	577.135	207.751	200.755	no cnx
2019_03_14_exp1_TH	3	pyramidal	2	187	231.745	Point 9	565.127	144.754	191.755	no cnx
2019_03_14_exp1_TH	3	pyramidal	2	187	231.745	Point 8	502.088	101.803	191.755	no cnx
2019_03_14_exp1_TH	3	pyramidal	2	187	231.745	Point 32	584.891	-24.8375	234.595	no cnx
2019_03_14_exp1_TH	3	pyramidal	2	187	231.745	Point 42	650.978	239.083	227.845	no cnx
2019_03_14_exp1_TH	3	pyramidal	2	187	231.745	Point 40	656.012	132.308	227.845	no cnx
2019_03_14_exp1_TH	3	pyramidal	2	187	231.745	Point 41	616.519	259.715	227.845	no cnx
2019_03_14_exp1_TH	3	pyramidal	2	187	231.745	Point 28	633.057	5.14957	222.535	no cnx
2019_03_14_exp1_TH	3	pyramidal	2	187	231.745	Point 29	540.45	-14.0774	222.535	no cnx
2019_03_14_exp1_TH	3	pyramidal	2	187	231.745	Point 20	641.886	186.335	180.715	no cnx
2019_03_14_exp1_TH	3	pyramidal	2	187	231.745	Point 21	498.14	224.235	165.315	no cnx
2019_03_14_exp1_TH	3	pyramidal	2	187	231.745	Point 22	522.837	210.559	165.315	no cnx
2019_03_14_exp1_TH	3	pyramidal	2	187	231.745	Point 23	560.702	88.0413	207.545	no cnx
2019_03_14_exp1_TH	3	pyramidal	2	187	231.745	Point 24	499.398	-22.4805	207.545	excitatory
2019_03_14_exp1_TH	3	pyramidal	2	187	231.745	Point 25	518.451	-66.8073	207.545	no cnx
2019_03_14_exp1_TH	3	pyramidal	2	187	231.745	Point 26	496.591	-63.4767	207.545	no cnx
2019_03_14_exp1_TH	3	pyramidal	2	187	231.745	Point 27	578.922	69.468	222.535	no cnx
2019_03_14_exp1_TH	3	pyramidal	2	187	231.745	Point 39	644.38	48.957	244.415	no cnx
2019_03_14_exp1_TH	3	pyramidal	2	187	231.745	Point 33	534.276	-95.2933	234.595	no cnx
2019_03_14_exp1_TH	3	pyramidal	2	187	231.745	Point 38	660.135	34.5684	244.415	no cnx
2019_03_14_exp1_TH	1	pyramidal	2	160	233.051	Point 11	537.447	-52	186.375	excitatory
2019_03_14_exp1_TH	1	pyramidal	2	160	233.051	Point 10	521.819	-18.4793	191.755	no cnx
2019_03_14_exp1_TH	1	pyramidal	2	160	233.051	Point 13	528.203	-91.2086	186.375	no cnx
2019_03_14_exp1_TH	1	pyramidal	2	160	233.051	Point 12	513.333	-58.9704	186.375	no cnx
2019_03_14_exp1_TH	1	pyramidal	2	160	233.051	Point 15	529.168	-7.00202	180.715	no cnx
2019_03_14_exp1_TH	1	pyramidal	2	160	233.051	Point 14	539.862	51.2323	180.715	no cnx
2019_03_14_exp1_TH	1	pyramidal	2	160	233.051	Point 17	538.223	-1.78608	180.715	no cnx
2019_03_14_exp1_TH	1	pyramidal	2	160	233.051	Point 16	517.561	46.7284	180.715	no cnx
2019_03_14_exp1_TH	1	pyramidal	2	160	233.051	Point 19	550.28	18.887	180.715	no cnx
2019_03_14_exp1_TH	1	pyramidal	2	160	233.051	Point 18	524.957	29.1385	180.715	no cnx
2019_03_14_exp1_TH	1	pyramidal	2	160	233.051	Point 31	652.594	-164.197	234.595	no cnx
2019_03_14_exp1_TH	1	pyramidal	2	160	233.051	Point 30	542.224	-214.49	222.535	no cnx
2019_03_14_exp1_TH	1	pyramidal	2	160	233.051	Point 37	574.477	-116.856	244.415	no cnx
2019_03_14_exp1_TH	1	pyramidal	2	160	233.051	Point 36	535.113	-114.77	244.415	no cnx
2019_03_14_exp1_TH	1	pyramidal	2	160	233.051	Point 35	493.368	-111.573	244.415	no cnx
2019_03_14_exp1_TH	1	pyramidal	2	160	233.051	Point 34	574.464	-210.035	234.595	no cnx
2019_03_14_exp1_TH	1	pyramidal	2	160	233.051	Point 5	601.266	-62.1043	200.755	no cnx
2019_03_14_exp1_TH	1	pyramidal	2	160	233.051	Point 4	554.523	-70.5841	200.755	no cnx
2019_03_14_exp1_TH	1	pyramidal	2	160	233.051	Point 7	496.203	46.6141	191.755	no cnx
2019_03_14_exp1_TH	1	pyramidal	2	160	233.051	Point 6	641.341	40.6352	200.755	no cnx
2019_03_14_exp1_TH	1	pyramidal	2	160	233.051	Point 1	541.633	41.6738	200.755	no cnx
2019_03_14_exp1_TH	1	pyramidal	2	160	233.051	Point 3	541.018	70.137	200.755	no cnx
2019_03_14_exp1_TH	1	pyramidal	2	160	233.051	Point 2	590.262	70.9922	200.755	no cnx
2019_03_14_exp1_TH	1	pyramidal	2	160	233.051	Point 9	578.254	7.99474	191.755	no cnx
2019_03_14_exp1_TH	1	pyramidal	2	160	233.051	Point 8	515.216	-34.9562	191.755	no cnx
2019_03_14_exp1_TH	1	pyramidal	2	160	233.051	Point 32	598.018	-161.597	234.595	no cnx
2019_03_14_exp1_TH	1	pyramidal	2	160	233.051	Point 42	664.106	102.324	227.845	no cnx
2019_03_14_exp1_TH	1	pyramidal	2	160	233.051	Point 40	669.139	-4.45132	227.845	no cnx
2019_03_14_exp1_TH	1	pyramidal	2	160	233.051	Point 41	629.647	122.956	227.845	no cnx
2019_03_14_exp1_TH	1	pyramidal	2	160	233.051	Point 28	646.184	-131.61	222.535	no cnx
2019_03_14_exp1_TH	1	pyramidal	2	160	233.051	Point 29	553.577	-150.837	222.535	no cnx
2019_03_14_exp1_TH	1	pyramidal	2	160	233.051	Point 20	655.014	49.5756	180.715	no cnx
2019_03_14_exp1_TH	1	pyramidal	2	160	233.051	Point 21	511.267	87.4757	165.315	no cnx
2019_03_14_exp1_TH	1	pyramidal	2	160	233.051	Point 22	535.964	73.8003	165.315	no cnx
2019_03_14_exp1_TH	1	pyramidal	2	160	233.051	Point 23	573.83	-48.7179	207.545	no cnx
2019_03_14_exp1_TH	1	pyramidal	2	160	233.051	Point 24	512.526	-159.24	207.545	no cnx
2019_03_14_exp1_TH	1	pyramidal	2	160	233.051	Point 25	531.579	-203.566	207.545	no cnx
2019_03_14_exp1_TH	1	pyramidal	2	160	233.051	Point 26	509.719	-200.236	207.545	no cnx
2019_03_14_exp1_TH	1	pyramidal	2	160	233.051	Point 27	592.049	-67.2912	222.535	no cnx
2019_03_14_exp1_TH	1	pyramidal	2	160	233.051	Point 39	657.508	-87.8022	244.415	no cnx
2019_03_14_exp1_TH	1	pyramidal	2	160	233.051	Point 33	547.404	-232.052	234.595	no cnx
2019_03_14_exp1_TH	1	pyramidal	2	160	233.051	Point 38	673.263	-102.191	244.415	no cnx
2019_03_14_exp1_TH	0	pyramidal	2	189	227.149	Point 11	527.293	-114.361	186.375	no cnx
2019_03_14_exp1_TH	0	pyramidal	2	189	227.149	Point 10	511.665	-80.8402	191.755	no cnx
2019_03_14_exp1_TH	0	pyramidal	2	189	227.149	Point 13	518.048	-153.57	186.375	excitatory
2019_03_14_exp1_TH	0	pyramidal	2	189	227.149	Point 12	503.179	-121.331	186.375	no cnx
2019_03_14_exp1_TH	0	pyramidal	2	189	227.149	Point 15	519.013	-69.3629	180.715	no cnx
2019_03_14_exp1_TH	0	pyramidal	2	189	227.149	Point 14	529.708	-11.1286	180.715	no cnx
2019_03_14_exp1_TH	0	pyramidal	2	189	227.149	Point 17	528.069	-64.147	180.715	no cnx
2019_03_14_exp1_TH	0	pyramidal	2	189	227.149	Point 16	507.406	-15.6325	180.715	no cnx
2019_03_14_exp1_TH	0	pyramidal	2	189	227.149	Point 19	540.126	-43.4739	180.715	no cnx
2019_03_14_exp1_TH	0	pyramidal	2	189	227.149	Point 18	514.803	-33.2224	180.715	no cnx
2019_03_14_exp1_TH	0	pyramidal	2	189	227.149	Point 31	642.44	-226.557	234.595	no cnx
2019_03_14_exp1_TH	0	pyramidal	2	189	227.149	Point 30	532.069	-276.851	222.535	no cnx
2019_03_14_exp1_TH	0	pyramidal	2	189	227.149	Point 37	564.323	-179.217	244.415	no cnx
2019_03_14_exp1_TH	0	pyramidal	2	189	227.149	Point 36	524.958	-177.13	244.415	no cnx
2019_03_14_exp1_TH	0	pyramidal	2	189	227.149	Point 35	483.214	-173.934	244.415	no cnx
2019_03_14_exp1_TH	0	pyramidal	2	189	227.149	Point 34	564.309	-272.395	234.595	no cnx
2019_03_14_exp1_TH	0	pyramidal	2	189	227.149	Point 5	591.112	-124.465	200.755	no cnx
2019_03_14_exp1_TH	0	pyramidal	2	189	227.149	Point 4	544.368	-132.945	200.755	no cnx
2019_03_14_exp1_TH	0	pyramidal	2	189	227.149	Point 7	486.048	-15.7468	191.755	no cnx
2019_03_14_exp1_TH	0	pyramidal	2	189	227.149	Point 6	631.187	-21.7257	200.755	no cnx
2019_03_14_exp1_TH	0	pyramidal	2	189	227.149	Point 1	531.479	-20.6871	200.755	no cnx
2019_03_14_exp1_TH	0	pyramidal	2	189	227.149	Point 3	530.864	7.77605	200.755	no cnx
2019_03_14_exp1_TH	0	pyramidal	2	189	227.149	Point 2	580.108	8.63132	200.755	excitatory
2019_03_14_exp1_TH	0	pyramidal	2	189	227.149	Point 9	568.1	-54.3662	191.755	no cnx
2019_03_14_exp1_TH	0	pyramidal	2	189	227.149	Point 8	505.061	-97.3171	191.755	no cnx
2019_03_14_exp1_TH	0	pyramidal	2	189	227.149	Point 32	587.864	-223.958	234.595	no cnx
2019_03_14_exp1_TH	0	pyramidal	2	189	227.149	Point 28	636.03	-193.971	222.535	no cnx
2019_03_14_exp1_TH	0	pyramidal	2	189	227.149	Point 29	543.423	-213.197	222.535	no cnx
2019_03_14_exp1_TH	0	pyramidal	2	189	227.149	Point 20	644.859	-12.7853	180.715	no cnx
2019_03_14_exp1_TH	0	pyramidal	2	189	227.149	Point 21	501.113	25.1147	165.315	no cnx
2019_03_14_exp1_TH	0	pyramidal	2	189	227.149	Point 22	525.81	11.4394	165.315	no cnx
2019_03_14_exp1_TH	0	pyramidal	2	189	227.149	Point 23	563.675	-111.079	207.545	excitatory
2019_03_14_exp1_TH	0	pyramidal	2	189	227.149	Point 24	502.372	-221.601	207.545	no cnx
2019_03_14_exp1_TH	0	pyramidal	2	189	227.149	Point 25	521.424	-265.927	207.545	no cnx
2019_03_14_exp1_TH	0	pyramidal	2	189	227.149	Point 26	499.564	-262.597	207.545	no cnx
2019_03_14_exp1_TH	0	pyramidal	2	189	227.149	Point 27	581.895	-129.652	222.535	no cnx
2019_03_14_exp1_TH	0	pyramidal	2	189	227.149	Point 39	647.353	-150.163	244.415	no cnx
2019_03_14_exp1_TH	0	pyramidal	2	189	227.149	Point 33	537.25	-294.413	234.595	no cnx
2019_03_14_exp1_TH	0	pyramidal	2	189	227.149	Point 38	663.108	-164.552	244.415	no cnx
2019_02_28_exp2_TH	1	pyramidal	2	231	352.349	Point 50	475.222	-320.931	311.509	no cnx
2019_02_28_exp2_TH	1	pyramidal	2	231	352.349	Point 11	472.183	-57.2213	339.149	excitatory
2019_02_28_exp2_TH	1	pyramidal	2	231	352.349	Point 10	514.544	-120.417	339.149	no cnx
2019_02_28_exp2_TH	1	pyramidal	2	231	352.349	Point 13	498.668	-162.784	339.149	no cnx
2019_02_28_exp2_TH	1	pyramidal	2	231	352.349	Point 12	454.24	-172.275	339.149	no cnx
2019_02_28_exp2_TH	1	pyramidal	2	231	352.349	Point 15	559.367	-194.376	339.149	no cnx
2019_02_28_exp2_TH	1	pyramidal	2	231	352.349	Point 14	611.656	-217.47	339.149	no cnx
2019_02_28_exp2_TH	1	pyramidal	2	231	352.349	Point 17	487.009	-213.544	339.149	no cnx
2019_02_28_exp2_TH	1	pyramidal	2	231	352.349	Point 16	485.198	-233.72	339.149	no cnx
2019_02_28_exp2_TH	1	pyramidal	2	231	352.349	Point 19	549.152	-234.436	331.549	no cnx
2019_02_28_exp2_TH	1	pyramidal	2	231	352.349	Point 18	508.331	-200.412	331.549	no cnx
2019_02_28_exp2_TH	1	pyramidal	2	231	352.349	Point 31	556.878	-109.5	322.019	excitatory
2019_02_28_exp2_TH	1	pyramidal	2	231	352.349	Point 30	575.54	-144.589	322.019	excitatory
2019_02_28_exp2_TH	1	pyramidal	2	231	352.349	Point 37	509.803	-162.925	322.019	no cnx
2019_02_28_exp2_TH	1	pyramidal	2	231	352.349	Point 36	524.434	-127.2	322.019	no cnx
2019_02_28_exp2_TH	1	pyramidal	2	231	352.349	Point 35	501.051	-202.885	322.019	no cnx
2019_02_28_exp2_TH	1	pyramidal	2	231	352.349	Point 34	455.383	-230.145	322.019	excitatory
2019_02_28_exp2_TH	1	pyramidal	2	231	352.349	Point 5	514.797	73.8549	339.149	no cnx
2019_02_28_exp2_TH	1	pyramidal	2	231	352.349	Point 4	483.971	-112.787	339.149	no cnx
2019_02_28_exp2_TH	1	pyramidal	2	231	352.349	Point 7	529.151	24.7712	339.149	no cnx
2019_02_28_exp2_TH	1	pyramidal	2	231	352.349	Point 6	478.313	-75.8331	339.149	excitatory
2019_02_28_exp2_TH	1	pyramidal	2	231	352.349	Point 1	566.998	101.145	339.149	no cnx
2019_02_28_exp2_TH	1	pyramidal	2	231	352.349	Point 3	504.158	-58.5354	339.149	no cnx
2019_02_28_exp2_TH	1	pyramidal	2	231	352.349	Point 2	532.23	40.0789	339.149	no cnx
2019_02_28_exp2_TH	1	pyramidal	2	231	352.349	Point 9	480.434	-145.429	339.149	no cnx
2019_02_28_exp2_TH	1	pyramidal	2	231	352.349	Point 8	500.378	-73.3737	339.149	no cnx
2019_02_28_exp2_TH	1	pyramidal	2	231	352.349	Point 32	504.463	-236.118	322.019	no cnx
2019_02_28_exp2_TH	1	pyramidal	2	231	352.349	Point 48	503.682	-304.821	311.509	no cnx
2019_02_28_exp2_TH	1	pyramidal	2	231	352.349	Point 42	538.504	-261.951	311.509	no cnx
2019_02_28_exp2_TH	1	pyramidal	2	231	352.349	Point 43	530.331	-302.296	311.509	no cnx
2019_02_28_exp2_TH	1	pyramidal	2	231	352.349	Point 40	505.992	-278.848	311.509	no cnx
2019_02_28_exp2_TH	1	pyramidal	2	231	352.349	Point 41	596.562	-254.858	311.509	no cnx
2019_02_28_exp2_TH	1	pyramidal	2	231	352.349	Point 46	485.624	-248.673	311.509	no cnx
2019_02_28_exp2_TH	1	pyramidal	2	231	352.349	Point 44	579.067	-337.817	311.509	no cnx
2019_02_28_exp2_TH	1	pyramidal	2	231	352.349	Point 45	490.612	-93.0829	311.509	no cnx
2019_02_28_exp2_TH	1	pyramidal	2	231	352.349	Point 28	525.4	-229.793	322.019	no cnx
2019_02_28_exp2_TH	1	pyramidal	2	231	352.349	Point 29	531.125	-103.872	322.019	no cnx
2019_02_28_exp2_TH	1	pyramidal	2	231	352.349	Point 20	514.064	-93.9719	331.549	no cnx
2019_02_28_exp2_TH	1	pyramidal	2	231	352.349	Point 21	498.342	-191.524	331.549	no cnx
2019_02_28_exp2_TH	1	pyramidal	2	231	352.349	Point 22	524.059	-41.1919	331.549	no cnx
2019_02_28_exp2_TH	1	pyramidal	2	231	352.349	Point 23	544.412	-255.539	331.549	no cnx
2019_02_28_exp2_TH	1	pyramidal	2	231	352.349	Point 24	442.308	-71.9411	331.549	no cnx
2019_02_28_exp2_TH	1	pyramidal	2	231	352.349	Point 25	529.861	-141.288	331.549	no cnx
2019_02_28_exp2_TH	1	pyramidal	2	231	352.349	Point 26	543.399	-57.25	331.549	no cnx
2019_02_28_exp2_TH	1	pyramidal	2	231	352.349	Point 27	469.546	-160.611	322.019	no cnx
2019_02_28_exp2_TH	1	pyramidal	2	231	352.349	Point 39	515.321	-235.096	311.509	no cnx
2019_02_28_exp2_TH	1	pyramidal	2	231	352.349	Point 38	533.808	-93.2247	322.019	no cnx
2019_02_28_exp1_TH	3	pyramidal	2	239	276.649	Point 11	540.977	-257.715	320.139	no cnx
2019_02_28_exp1_TH	3	pyramidal	2	239	276.649	Point 10	517.684	-100.68	329.809	no cnx
2019_02_28_exp1_TH	3	pyramidal	2	239	276.649	Point 13	530.569	-177.613	320.139	no cnx
2019_02_28_exp1_TH	3	pyramidal	2	239	276.649	Point 12	632.264	-165.699	320.139	no cnx
2019_02_28_exp1_TH	3	pyramidal	2	239	276.649	Point 15	534.79	-85.9712	320.139	no cnx
2019_02_28_exp1_TH	3	pyramidal	2	239	276.649	Point 14	485.729	-162.487	320.139	no cnx
2019_02_28_exp1_TH	3	pyramidal	2	239	276.649	Point 17	515.623	-139.904	322.519	excitatory
2019_02_28_exp1_TH	3	pyramidal	2	239	276.649	Point 16	687.882	-156.578	320.139	no cnx
2019_02_28_exp1_TH	3	pyramidal	2	239	276.649	Point 19	532.315	-56.4738	322.519	no cnx
2019_02_28_exp1_TH	3	pyramidal	2	239	276.649	Point 18	582.58	-171.8	322.519	no cnx
2019_02_28_exp1_TH	3	pyramidal	2	239	276.649	Point 31	555.755	-62.6208	312.419	no cnx
2019_02_28_exp1_TH	3	pyramidal	2	239	276.649	Point 30	500.573	-98.6245	312.419	no cnx
2019_02_28_exp1_TH	3	pyramidal	2	239	276.649	Point 37	470.283	-153.719	301.389	no cnx
2019_02_28_exp1_TH	3	pyramidal	2	239	276.649	Point 36	476.774	-225.426	301.389	no cnx
2019_02_28_exp1_TH	3	pyramidal	2	239	276.649	Point 35	466.566	-72.3574	314.899	excitatory
2019_02_28_exp1_TH	3	pyramidal	2	239	276.649	Point 34	561.806	-78.1221	314.899	excitatory
2019_02_28_exp1_TH	3	pyramidal	2	239	276.649	Point 5	486.828	-241.834	327.749	no cnx
2019_02_28_exp1_TH	3	pyramidal	2	239	276.649	Point 4	546.317	-82.5598	327.749	no cnx
2019_02_28_exp1_TH	3	pyramidal	2	239	276.649	Point 7	550.943	-217.521	329.809	no cnx
2019_02_28_exp1_TH	3	pyramidal	2	239	276.649	Point 6	594.29	-141.527	327.749	no cnx
2019_02_28_exp1_TH	3	pyramidal	2	239	276.649	Point 1	475.168	-181.54	327.749	no cnx
2019_02_28_exp1_TH	3	pyramidal	2	239	276.649	Point 3	490.871	-208.922	327.749	no cnx
2019_02_28_exp1_TH	3	pyramidal	2	239	276.649	Point 2	570.379	-108.916	327.749	no cnx
2019_02_28_exp1_TH	3	pyramidal	2	239	276.649	Point 9	555.104	-153.395	329.809	no cnx
2019_02_28_exp1_TH	3	pyramidal	2	239	276.649	Point 8	510.184	-207.625	329.809	no cnx
2019_02_28_exp1_TH	3	pyramidal	2	239	276.649	Point 32	485.457	-138.878	312.419	no cnx
2019_02_28_exp1_TH	3	pyramidal	2	239	276.649	Point 40	571.64	-185.545	301.389	no cnx
2019_02_28_exp1_TH	3	pyramidal	2	239	276.649	Point 41	671.85	-142.867	301.389	no cnx
2019_02_28_exp1_TH	3	pyramidal	2	239	276.649	Point 28	681.654	-243.163	312.419	no cnx
2019_02_28_exp1_TH	3	pyramidal	2	239	276.649	Point 29	475.945	-262.117	312.419	no cnx
2019_02_28_exp1_TH	3	pyramidal	2	239	276.649	Point 20	508.533	-26.1539	322.519	no cnx
2019_02_28_exp1_TH	3	pyramidal	2	239	276.649	Point 21	632.745	-152.887	312.419	no cnx
2019_02_28_exp1_TH	3	pyramidal	2	239	276.649	Point 22	515.022	-234.968	312.419	no cnx
2019_02_28_exp1_TH	3	pyramidal	2	239	276.649	Point 23	539.065	-48.0501	312.419	no cnx
2019_02_28_exp1_TH	3	pyramidal	2	239	276.649	Point 24	627.91	-234.862	312.419	no cnx
2019_02_28_exp1_TH	3	pyramidal	2	239	276.649	Point 25	534.505	-230.283	312.419	no cnx
2019_02_28_exp1_TH	3	pyramidal	2	239	276.649	Point 26	532.427	-148.012	312.419	no cnx
2019_02_28_exp1_TH	3	pyramidal	2	239	276.649	Point 27	632.696	-143.151	312.419	no cnx
2019_02_28_exp1_TH	3	pyramidal	2	239	276.649	Point 39	468.246	-42.8993	301.389	no cnx
2019_02_28_exp1_TH	3	pyramidal	2	239	276.649	Point 33	504.46	-75.7952	314.899	no cnx
2019_02_28_exp1_TH	3	pyramidal	2	239	276.649	Point 38	454.447	-100.129	301.389	no cnx
2019_02_28_exp1_TH	0	pyramidal	2	274	279.389	Point 11	529.431	-3.29411	320.139	no cnx
2019_02_28_exp1_TH	0	pyramidal	2	274	279.389	Point 10	506.138	153.741	329.809	no cnx
2019_02_28_exp1_TH	0	pyramidal	2	274	279.389	Point 13	519.023	76.8084	320.139	no cnx
2019_02_28_exp1_TH	0	pyramidal	2	274	279.389	Point 12	620.718	88.7219	320.139	no cnx
2019_02_28_exp1_TH	0	pyramidal	2	274	279.389	Point 15	523.244	168.45	320.139	no cnx
2019_02_28_exp1_TH	0	pyramidal	2	274	279.389	Point 14	474.183	91.9344	320.139	excitatory
2019_02_28_exp1_TH	0	pyramidal	2	274	279.389	Point 17	504.077	114.517	322.519	no cnx
2019_02_28_exp1_TH	0	pyramidal	2	274	279.389	Point 16	676.336	97.8432	320.139	no cnx
2019_02_28_exp1_TH	0	pyramidal	2	274	279.389	Point 19	520.769	197.947	322.519	no cnx
2019_02_28_exp1_TH	0	pyramidal	2	274	279.389	Point 18	571.034	82.6215	322.519	no cnx
2019_02_28_exp1_TH	0	pyramidal	2	274	279.389	Point 31	544.209	191.8	312.419	no cnx
2019_02_28_exp1_TH	0	pyramidal	2	274	279.389	Point 30	489.027	155.797	312.419	no cnx
2019_02_28_exp1_TH	0	pyramidal	2	274	279.389	Point 37	458.737	100.702	301.389	excitatory
2019_02_28_exp1_TH	0	pyramidal	2	274	279.389	Point 36	465.228	28.9948	301.389	no cnx
2019_02_28_exp1_TH	0	pyramidal	2	274	279.389	Point 35	455.02	182.064	314.899	no cnx
2019_02_28_exp1_TH	0	pyramidal	2	274	279.389	Point 34	550.26	176.299	314.899	excitatory
2019_02_28_exp1_TH	0	pyramidal	2	274	279.389	Point 5	475.282	12.5875	327.749	no cnx
2019_02_28_exp1_TH	0	pyramidal	2	274	279.389	Point 4	534.771	171.861	327.749	no cnx
2019_02_28_exp1_TH	0	pyramidal	2	274	279.389	Point 7	539.397	36.9004	329.809	no cnx
2019_02_28_exp1_TH	0	pyramidal	2	274	279.389	Point 6	582.744	112.894	327.749	no cnx
2019_02_28_exp1_TH	0	pyramidal	2	274	279.389	Point 1	463.622	72.8808	327.749	no cnx
2019_02_28_exp1_TH	0	pyramidal	2	274	279.389	Point 3	479.325	45.4988	327.749	no cnx
2019_02_28_exp1_TH	0	pyramidal	2	274	279.389	Point 2	558.833	145.505	327.749	no cnx
2019_02_28_exp1_TH	0	pyramidal	2	274	279.389	Point 9	543.558	101.026	329.809	no cnx
2019_02_28_exp1_TH	0	pyramidal	2	274	279.389	Point 8	498.638	46.7965	329.809	no cnx
2019_02_28_exp1_TH	0	pyramidal	2	274	279.389	Point 32	473.911	115.543	312.419	no cnx
2019_02_28_exp1_TH	0	pyramidal	2	274	279.389	Point 42	464.496	294.828	361.679	no cnx
2019_02_28_exp1_TH	0	pyramidal	2	274	279.389	Point 43	468.875	369.071	361.679	no cnx
2019_02_28_exp1_TH	0	pyramidal	2	274	279.389	Point 40	560.094	68.8757	301.389	no cnx
2019_02_28_exp1_TH	0	pyramidal	2	274	279.389	Point 41	660.304	111.554	301.389	no cnx
2019_02_28_exp1_TH	0	pyramidal	2	274	279.389	Point 44	509.964	457.163	361.679	no cnx
2019_02_28_exp1_TH	0	pyramidal	2	274	279.389	Point 45	459.156	436.435	361.679	no cnx
2019_02_28_exp1_TH	0	pyramidal	2	274	279.389	Point 28	670.108	11.2579	312.419	no cnx
2019_02_28_exp1_TH	0	pyramidal	2	274	279.389	Point 29	464.399	-7.69587	312.419	no cnx
2019_02_28_exp1_TH	0	pyramidal	2	274	279.389	Point 20	496.987	228.267	322.519	no cnx
2019_02_28_exp1_TH	0	pyramidal	2	274	279.389	Point 21	621.199	101.534	312.419	no cnx
2019_02_28_exp1_TH	0	pyramidal	2	274	279.389	Point 22	503.475	19.453	312.419	no cnx
2019_02_28_exp1_TH	0	pyramidal	2	274	279.389	Point 23	527.519	206.371	312.419	no cnx
2019_02_28_exp1_TH	0	pyramidal	2	274	279.389	Point 24	616.363	19.5595	312.419	no cnx
2019_02_28_exp1_TH	0	pyramidal	2	274	279.389	Point 25	522.959	24.1377	312.419	no cnx
2019_02_28_exp1_TH	0	pyramidal	2	274	279.389	Point 26	520.881	106.409	312.419	no cnx
2019_02_28_exp1_TH	0	pyramidal	2	274	279.389	Point 27	621.15	111.27	312.419	no cnx
2019_02_28_exp1_TH	0	pyramidal	2	274	279.389	Point 39	456.7	211.522	301.389	no cnx
2019_02_28_exp1_TH	0	pyramidal	2	274	279.389	Point 33	492.914	178.626	314.899	no cnx
2019_02_28_exp1_TH	0	pyramidal	2	274	279.389	Point 38	442.901	154.293	301.389	no cnx
2019_02_18_exp2_TH	2	pyramidal	2	201	866.746	Point 51	584.525	346.955	823.076	no cnx
2019_02_18_exp2_TH	2	pyramidal	2	201	866.746	Point 50	617.035	480.357	823.076	no cnx
2019_02_18_exp2_TH	2	pyramidal	2	201	866.746	Point 52	594.441	370.143	823.076	no cnx
2019_02_18_exp2_TH	2	pyramidal	2	201	866.746	Point 11	588.423	-107.872	875.466	no cnx
2019_02_18_exp2_TH	2	pyramidal	2	201	866.746	Point 10	706.257	120.043	874.216	no cnx
2019_02_18_exp2_TH	2	pyramidal	2	201	866.746	Point 13	585.095	33.0612	875.466	no cnx
2019_02_18_exp2_TH	2	pyramidal	2	201	866.746	Point 12	646.773	-16.9229	875.466	no cnx
2019_02_18_exp2_TH	2	pyramidal	2	201	866.746	Point 15	572.157	-13.4911	875.466	no cnx
2019_02_18_exp2_TH	2	pyramidal	2	201	866.746	Point 14	529.864	61.6004	875.466	no cnx
2019_02_18_exp2_TH	2	pyramidal	2	201	866.746	Point 17	608.526	113.288	867.436	no cnx
2019_02_18_exp2_TH	2	pyramidal	2	201	866.746	Point 16	542.455	42.4829	867.436	no cnx
2019_02_18_exp2_TH	2	pyramidal	2	201	866.746	Point 19	558.779	52.7856	867.436	no cnx
2019_02_18_exp2_TH	2	pyramidal	2	201	866.746	Point 18	547.302	6.76113	867.436	no cnx
2019_02_18_exp2_TH	2	pyramidal	2	201	866.746	Point 31	582.998	285.876	885.736	no cnx
2019_02_18_exp2_TH	2	pyramidal	2	201	866.746	Point 30	520.994	146.679	885.736	no cnx
2019_02_18_exp2_TH	2	pyramidal	2	201	866.746	Point 37	610.637	277.695	834.996	no cnx
2019_02_18_exp2_TH	2	pyramidal	2	201	866.746	Point 36	638.081	173.534	896.676	no cnx
2019_02_18_exp2_TH	2	pyramidal	2	201	866.746	Point 35	560.368	217.452	896.676	no cnx
2019_02_18_exp2_TH	2	pyramidal	2	201	866.746	Point 34	623.454	206.326	896.676	no cnx
2019_02_18_exp2_TH	2	pyramidal	2	201	866.746	Point 5	618.643	-24.1026	890.856	no cnx
2019_02_18_exp2_TH	2	pyramidal	2	201	866.746	Point 4	635.329	134.4	890.856	no cnx
2019_02_18_exp2_TH	2	pyramidal	2	201	866.746	Point 7	566.188	81.2569	874.216	no cnx
2019_02_18_exp2_TH	2	pyramidal	2	201	866.746	Point 6	551.352	-51.4385	874.216	no cnx
2019_02_18_exp2_TH	2	pyramidal	2	201	866.746	Point 1	584.138	-37.4762	890.856	no cnx
2019_02_18_exp2_TH	2	pyramidal	2	201	866.746	Point 3	603.049	-0.19467	890.856	no cnx
2019_02_18_exp2_TH	2	pyramidal	2	201	866.746	Point 2	667.152	110.722	890.856	no cnx
2019_02_18_exp2_TH	2	pyramidal	2	201	866.746	Point 9	694.779	2.80067	875.466	no cnx
2019_02_18_exp2_TH	2	pyramidal	2	201	866.746	Point 8	603.208	-42.2864	874.216	no cnx
2019_02_18_exp2_TH	2	pyramidal	2	201	866.746	Point 32	506.551	186.97	885.736	no cnx
2019_02_18_exp2_TH	2	pyramidal	2	201	866.746	Point 48	640.092	346.298	823.076	no cnx
2019_02_18_exp2_TH	2	pyramidal	2	201	866.746	Point 49	567.083	379.229	823.076	no cnx
2019_02_18_exp2_TH	2	pyramidal	2	201	866.746	Point 42	554.407	422.377	834.996	no cnx
2019_02_18_exp2_TH	2	pyramidal	2	201	866.746	Point 43	584.69	251.433	834.996	no cnx
2019_02_18_exp2_TH	2	pyramidal	2	201	866.746	Point 40	582.577	387.434	834.996	no cnx
2019_02_18_exp2_TH	2	pyramidal	2	201	866.746	Point 41	681.817	395.824	834.996	no cnx
2019_02_18_exp2_TH	2	pyramidal	2	201	866.746	Point 46	573.424	309.116	823.076	no cnx
2019_02_18_exp2_TH	2	pyramidal	2	201	866.746	Point 47	599.972	353.547	823.076	no cnx
2019_02_18_exp2_TH	2	pyramidal	2	201	866.746	Point 44	590.13	491.677	834.996	no cnx
2019_02_18_exp2_TH	2	pyramidal	2	201	866.746	Point 45	548.748	267.636	823.076	no cnx
2019_02_18_exp2_TH	2	pyramidal	2	201	866.746	Point 28	593.092	155.333	885.736	no cnx
2019_02_18_exp2_TH	2	pyramidal	2	201	866.746	Point 29	551.194	94.2718	885.736	no cnx
2019_02_18_exp2_TH	2	pyramidal	2	201	866.746	Point 20	553.609	82.2186	870.416	no cnx
2019_02_18_exp2_TH	2	pyramidal	2	201	866.746	Point 21	590.149	69.6296	870.416	no cnx
2019_02_18_exp2_TH	2	pyramidal	2	201	866.746	Point 22	493.535	47.5209	870.416	no cnx
2019_02_18_exp2_TH	2	pyramidal	2	201	866.746	Point 23	504.375	70.3957	863.016	no cnx
2019_02_18_exp2_TH	2	pyramidal	2	201	866.746	Point 24	539.766	69.3431	863.016	no cnx
2019_02_18_exp2_TH	2	pyramidal	2	201	866.746	Point 25	652.004	97.1347	867.226	excitatory
2019_02_18_exp2_TH	2	pyramidal	2	201	866.746	Point 26	612.092	205.571	863.016	no cnx
2019_02_18_exp2_TH	2	pyramidal	2	201	866.746	Point 27	544.031	254.807	863.016	no cnx
2019_02_18_exp2_TH	2	pyramidal	2	201	866.746	Point 39	660.533	313.765	834.996	no cnx
2019_02_18_exp2_TH	2	pyramidal	2	201	866.746	Point 33	571.896	184.044	896.676	no cnx
2019_02_18_exp2_TH	2	pyramidal	2	201	866.746	Point 38	562.212	298.995	834.996	no cnx
2019_02_18_exp2_TH	1	pyramidal	2	233	867.496	Point 51	580.374	408.642	823.076	no cnx
2019_02_18_exp2_TH	1	pyramidal	2	233	867.496	Point 50	612.884	542.044	823.076	no cnx
2019_02_18_exp2_TH	1	pyramidal	2	233	867.496	Point 52	590.29	431.83	823.076	no cnx
2019_02_18_exp2_TH	1	pyramidal	2	233	867.496	Point 11	584.271	-46.1848	875.466	no cnx
2019_02_18_exp2_TH	1	pyramidal	2	233	867.496	Point 10	702.105	181.73	874.216	no cnx
2019_02_18_exp2_TH	1	pyramidal	2	233	867.496	Point 13	580.944	94.7484	875.466	no cnx
2019_02_18_exp2_TH	1	pyramidal	2	233	867.496	Point 12	642.622	44.7642	875.466	no cnx
2019_02_18_exp2_TH	1	pyramidal	2	233	867.496	Point 15	568.006	48.1961	875.466	no cnx
2019_02_18_exp2_TH	1	pyramidal	2	233	867.496	Point 14	525.712	123.288	875.466	no cnx
2019_02_18_exp2_TH	1	pyramidal	2	233	867.496	Point 17	604.374	174.975	867.436	no cnx
2019_02_18_exp2_TH	1	pyramidal	2	233	867.496	Point 16	538.303	104.17	867.436	no cnx
2019_02_18_exp2_TH	1	pyramidal	2	233	867.496	Point 19	554.628	114.473	867.436	excitatory
2019_02_18_exp2_TH	1	pyramidal	2	233	867.496	Point 18	543.151	68.4483	867.436	no cnx
2019_02_18_exp2_TH	1	pyramidal	2	233	867.496	Point 31	578.847	347.563	885.736	no cnx
2019_02_18_exp2_TH	1	pyramidal	2	233	867.496	Point 30	516.842	208.366	885.736	no cnx
2019_02_18_exp2_TH	1	pyramidal	2	233	867.496	Point 37	606.486	339.382	834.996	no cnx
2019_02_18_exp2_TH	1	pyramidal	2	233	867.496	Point 36	633.929	235.221	896.676	no cnx
2019_02_18_exp2_TH	1	pyramidal	2	233	867.496	Point 35	556.217	279.139	896.676	no cnx
2019_02_18_exp2_TH	1	pyramidal	2	233	867.496	Point 34	619.302	268.013	896.676	no cnx
2019_02_18_exp2_TH	1	pyramidal	2	233	867.496	Point 5	614.491	37.5846	890.856	no cnx
2019_02_18_exp2_TH	1	pyramidal	2	233	867.496	Point 4	631.178	196.087	890.856	no cnx
2019_02_18_exp2_TH	1	pyramidal	2	233	867.496	Point 7	562.037	142.944	874.216	no cnx
2019_02_18_exp2_TH	1	pyramidal	2	233	867.496	Point 6	547.2	10.2486	874.216	no cnx
2019_02_18_exp2_TH	1	pyramidal	2	233	867.496	Point 1	579.986	24.211	890.856	no cnx
2019_02_18_exp2_TH	1	pyramidal	2	233	867.496	Point 3	598.898	61.4925	890.856	no cnx
2019_02_18_exp2_TH	1	pyramidal	2	233	867.496	Point 2	663	172.41	890.856	no cnx
2019_02_18_exp2_TH	1	pyramidal	2	233	867.496	Point 9	690.627	64.4878	875.466	no cnx
2019_02_18_exp2_TH	1	pyramidal	2	233	867.496	Point 8	599.056	19.4007	874.216	no cnx
2019_02_18_exp2_TH	1	pyramidal	2	233	867.496	Point 32	502.4	248.657	885.736	no cnx
2019_02_18_exp2_TH	1	pyramidal	2	233	867.496	Point 48	635.941	407.985	823.076	no cnx
2019_02_18_exp2_TH	1	pyramidal	2	233	867.496	Point 49	562.931	440.916	823.076	no cnx
2019_02_18_exp2_TH	1	pyramidal	2	233	867.496	Point 42	550.256	484.065	834.996	no cnx
2019_02_18_exp2_TH	1	pyramidal	2	233	867.496	Point 43	580.539	313.12	834.996	no cnx
2019_02_18_exp2_TH	1	pyramidal	2	233	867.496	Point 40	578.426	449.121	834.996	no cnx
2019_02_18_exp2_TH	1	pyramidal	2	233	867.496	Point 41	677.666	457.511	834.996	no cnx
2019_02_18_exp2_TH	1	pyramidal	2	233	867.496	Point 46	569.272	370.803	823.076	no cnx
2019_02_18_exp2_TH	1	pyramidal	2	233	867.496	Point 47	595.821	415.234	823.076	no cnx
2019_02_18_exp2_TH	1	pyramidal	2	233	867.496	Point 44	585.978	553.364	834.996	no cnx
2019_02_18_exp2_TH	1	pyramidal	2	233	867.496	Point 45	544.597	329.324	823.076	no cnx
2019_02_18_exp2_TH	1	pyramidal	2	233	867.496	Point 28	588.94	217.02	885.736	no cnx
2019_02_18_exp2_TH	1	pyramidal	2	233	867.496	Point 29	547.042	155.959	885.736	no cnx
2019_02_18_exp2_TH	1	pyramidal	2	233	867.496	Point 20	549.457	143.906	870.416	no cnx
2019_02_18_exp2_TH	1	pyramidal	2	233	867.496	Point 21	585.998	131.317	870.416	no cnx
2019_02_18_exp2_TH	1	pyramidal	2	233	867.496	Point 22	489.384	109.208	870.416	no cnx
2019_02_18_exp2_TH	1	pyramidal	2	233	867.496	Point 23	500.224	132.083	863.016	no cnx
2019_02_18_exp2_TH	1	pyramidal	2	233	867.496	Point 24	535.614	131.03	863.016	no cnx
2019_02_18_exp2_TH	1	pyramidal	2	233	867.496	Point 25	647.852	158.822	867.226	no cnx
2019_02_18_exp2_TH	1	pyramidal	2	233	867.496	Point 26	607.94	267.258	863.016	no cnx
2019_02_18_exp2_TH	1	pyramidal	2	233	867.496	Point 27	539.88	316.494	863.016	no cnx
2019_02_18_exp2_TH	1	pyramidal	2	233	867.496	Point 39	656.381	375.452	834.996	no cnx
2019_02_18_exp2_TH	1	pyramidal	2	233	867.496	Point 33	567.745	245.731	896.676	no cnx
2019_02_18_exp2_TH	1	pyramidal	2	233	867.496	Point 38	558.06	360.682	834.996	no cnx
2019_02_15_exp2_TH	3	pyramidal	2	316	640.036	Point 11	582.962	82.3124	708.266	no cnx
2019_02_15_exp2_TH	3	pyramidal	2	316	640.036	Point 10	619.918	-47.5072	708.266	no cnx
2019_02_15_exp2_TH	3	pyramidal	2	316	640.036	Point 13	610.393	94.819	708.266	no cnx
2019_02_15_exp2_TH	3	pyramidal	2	316	640.036	Point 12	540.592	-9.98515	708.266	no cnx
2019_02_15_exp2_TH	3	pyramidal	2	316	640.036	Point 15	559.165	85.717	702.046	no cnx
2019_02_15_exp2_TH	3	pyramidal	2	316	640.036	Point 14	589.759	118.568	702.046	excitatory
2019_02_15_exp2_TH	3	pyramidal	2	316	640.036	Point 17	622.179	-98.0263	702.046	no cnx
2019_02_15_exp2_TH	3	pyramidal	2	316	640.036	Point 16	548.124	12.8635	702.046	no cnx
2019_02_15_exp2_TH	3	pyramidal	2	316	640.036	Point 19	548.935	51.6634	691.116	no cnx
2019_02_15_exp2_TH	3	pyramidal	2	316	640.036	Point 18	569.437	14.7852	702.046	no cnx
2019_02_15_exp2_TH	3	pyramidal	2	316	640.036	Point 31	652.84	-67.4807	701.766	no cnx
2019_02_15_exp2_TH	3	pyramidal	2	316	640.036	Point 30	526.381	-67.1085	701.766	no cnx
2019_02_15_exp2_TH	3	pyramidal	2	316	640.036	Point 37	553.302	-87.969	686.536	no cnx
2019_02_15_exp2_TH	3	pyramidal	2	316	640.036	Point 36	543.114	-180.824	686.536	no cnx
2019_02_15_exp2_TH	3	pyramidal	2	316	640.036	Point 35	591.306	-174.636	686.536	no cnx
2019_02_15_exp2_TH	3	pyramidal	2	316	640.036	Point 34	558.083	-219.734	686.536	no cnx
2019_02_15_exp2_TH	3	pyramidal	2	316	640.036	Point 5	669.385	133.517	708.266	excitatory
2019_02_15_exp2_TH	3	pyramidal	2	316	640.036	Point 4	534.776	100.962	708.266	no cnx
2019_02_15_exp2_TH	3	pyramidal	2	316	640.036	Point 7	618.788	180.25	708.266	no cnx
2019_02_15_exp2_TH	3	pyramidal	2	316	640.036	Point 6	609.52	193.084	706.266	no cnx
2019_02_15_exp2_TH	3	pyramidal	2	316	640.036	Point 1	636.328	190.276	708.266	no cnx
2019_02_15_exp2_TH	3	pyramidal	2	316	640.036	Point 3	604.139	174.197	706.266	no cnx
2019_02_15_exp2_TH	3	pyramidal	2	316	640.036	Point 2	614.807	66.6866	706.266	no cnx
2019_02_15_exp2_TH	3	pyramidal	2	316	640.036	Point 9	557.589	-47.8527	708.266	no cnx
2019_02_15_exp2_TH	3	pyramidal	2	316	640.036	Point 8	607.791	131.769	708.266	no cnx
2019_02_15_exp2_TH	3	pyramidal	2	316	640.036	Point 32	698.312	-125.438	701.766	no cnx
2019_02_15_exp2_TH	3	pyramidal	2	316	640.036	Point 28	545.457	171.571	691.116	no cnx
2019_02_15_exp2_TH	3	pyramidal	2	316	640.036	Point 29	557.959	-190.708	701.766	no cnx
2019_02_15_exp2_TH	3	pyramidal	2	316	640.036	Point 20	571.589	-25.4098	691.116	no cnx
2019_02_15_exp2_TH	3	pyramidal	2	316	640.036	Point 21	570.795	-103.933	691.116	no cnx
2019_02_15_exp2_TH	3	pyramidal	2	316	640.036	Point 22	541.138	31.8215	691.116	no cnx
2019_02_15_exp2_TH	3	pyramidal	2	316	640.036	Point 23	576.7	-1.60194	691.116	no cnx
2019_02_15_exp2_TH	3	pyramidal	2	316	640.036	Point 24	602.161	-51.8676	691.116	no cnx
2019_02_15_exp2_TH	3	pyramidal	2	316	640.036	Point 25	538.953	137.157	691.116	no cnx
2019_02_15_exp2_TH	3	pyramidal	2	316	640.036	Point 26	582.666	213.099	691.116	no cnx
2019_02_15_exp2_TH	3	pyramidal	2	316	640.036	Point 27	539.29	149.022	691.116	no cnx
2019_02_15_exp2_TH	3	pyramidal	2	316	640.036	Point 33	641.132	-145.823	701.766	no cnx
2019_02_15_exp2_TH	3	pyramidal	2	316	640.036	Point 38	568.669	-44.951	686.536	no cnx
2019_02_15_exp2_TH	2	pyramidal	2	241	706.27	Point 11	582.169	88.6669	708.266	no cnx
2019_02_15_exp2_TH	2	pyramidal	2	241	706.27	Point 10	619.125	-41.1527	708.266	no cnx
2019_02_15_exp2_TH	2	pyramidal	2	241	706.27	Point 13	609.6	101.173	708.266	no cnx
2019_02_15_exp2_TH	2	pyramidal	2	241	706.27	Point 12	539.799	-3.63066	708.266	no cnx
2019_02_15_exp2_TH	2	pyramidal	2	241	706.27	Point 5	668.592	139.871	708.266	no cnx
2019_02_15_exp2_TH	2	pyramidal	2	241	706.27	Point 4	533.983	107.316	708.266	no cnx
2019_02_15_exp2_TH	2	pyramidal	2	241	706.27	Point 7	617.995	186.604	708.266	no cnx
2019_02_15_exp2_TH	2	pyramidal	2	241	706.27	Point 6	608.727	199.438	706.266	no cnx
2019_02_15_exp2_TH	2	pyramidal	2	241	706.27	Point 1	635.535	196.631	708.266	excitatory
2019_02_15_exp2_TH	2	pyramidal	2	241	706.27	Point 3	603.347	180.551	706.266	no cnx
2019_02_15_exp2_TH	2	pyramidal	2	241	706.27	Point 2	614.014	73.0411	706.266	no cnx
2019_02_15_exp2_TH	2	pyramidal	2	241	706.27	Point 9	556.796	-41.4982	708.266	no cnx
2019_02_15_exp2_TH	2	pyramidal	2	241	706.27	Point 8	606.998	138.123	708.266	no cnx
2019_02_15_exp2_TH	1	pyramidal	2	310	687.036	Point 11	582.621	6.89416	708.266	no cnx
2019_02_15_exp2_TH	1	pyramidal	2	310	687.036	Point 10	619.577	-122.925	708.266	no cnx
2019_02_15_exp2_TH	1	pyramidal	2	310	687.036	Point 13	610.052	19.4007	708.266	no cnx
2019_02_15_exp2_TH	1	pyramidal	2	310	687.036	Point 12	540.251	-85.4034	708.266	no cnx
2019_02_15_exp2_TH	1	pyramidal	2	310	687.036	Point 15	558.824	10.2988	702.046	no cnx
2019_02_15_exp2_TH	1	pyramidal	2	310	687.036	Point 14	589.418	43.1496	702.046	no cnx
2019_02_15_exp2_TH	1	pyramidal	2	310	687.036	Point 17	621.838	-173.445	702.046	no cnx
2019_02_15_exp2_TH	1	pyramidal	2	310	687.036	Point 16	547.783	-62.5547	702.046	no cnx
2019_02_15_exp2_TH	1	pyramidal	2	310	687.036	Point 19	548.594	-23.7548	691.116	no cnx
2019_02_15_exp2_TH	1	pyramidal	2	310	687.036	Point 18	569.096	-60.633	702.046	no cnx
2019_02_15_exp2_TH	1	pyramidal	2	310	687.036	Point 5	669.044	58.0986	708.266	no cnx
2019_02_15_exp2_TH	1	pyramidal	2	310	687.036	Point 4	534.435	25.5437	708.266	no cnx
2019_02_15_exp2_TH	1	pyramidal	2	310	687.036	Point 7	618.447	104.831	708.266	no cnx
2019_02_15_exp2_TH	1	pyramidal	2	310	687.036	Point 6	609.179	117.666	706.266	no cnx
2019_02_15_exp2_TH	1	pyramidal	2	310	687.036	Point 1	635.987	114.858	708.266	no cnx
2019_02_15_exp2_TH	1	pyramidal	2	310	687.036	Point 3	603.799	98.7787	706.266	no cnx
2019_02_15_exp2_TH	1	pyramidal	2	310	687.036	Point 2	614.466	-8.73157	706.266	no cnx
2019_02_15_exp2_TH	1	pyramidal	2	310	687.036	Point 9	557.248	-123.271	708.266	no cnx
2019_02_15_exp2_TH	1	pyramidal	2	310	687.036	Point 8	607.45	56.3504	708.266	no cnx
2019_02_15_exp2_TH	1	pyramidal	2	310	687.036	Point 28	545.116	96.153	691.116	no cnx
2019_02_15_exp2_TH	1	pyramidal	2	310	687.036	Point 20	571.248	-100.828	691.116	no cnx
2019_02_15_exp2_TH	1	pyramidal	2	310	687.036	Point 21	570.454	-179.352	691.116	no cnx
2019_02_15_exp2_TH	1	pyramidal	2	310	687.036	Point 22	540.797	-43.5967	691.116	no cnx
2019_02_15_exp2_TH	1	pyramidal	2	310	687.036	Point 23	576.359	-77.0202	691.116	no cnx
2019_02_15_exp2_TH	1	pyramidal	2	310	687.036	Point 24	601.82	-127.286	691.116	no cnx
2019_02_15_exp2_TH	1	pyramidal	2	310	687.036	Point 25	538.612	61.7389	691.116	no cnx
2019_02_15_exp2_TH	1	pyramidal	2	310	687.036	Point 26	582.326	137.68	691.116	no cnx
2019_02_15_exp2_TH	1	pyramidal	2	310	687.036	Point 27	538.949	73.6034	691.116	no cnx

## Sheet: Fig5B_Ntsr1_L23pyr_map
exp_id	headstage	post_class	post_layer	postPia	post_z	MP_ID	prePia	x_ap	pre_z	cnx
2019_08_28_exp1_TH	3	pyramidal	2	146	475.636	Point 11	914.654	-713.028	242.316	no cnx
2019_08_28_exp1_TH	3	pyramidal	2	146	475.636	Point 10	950.265	-670.818	242.316	no cnx
2019_08_28_exp1_TH	3	pyramidal	2	146	475.636	Point 13	836.987	-800.705	242.316	no cnx
2019_08_28_exp1_TH	3	pyramidal	2	146	475.636	Point 12	812.437	-665.751	242.316	no cnx
2019_08_28_exp1_TH	3	pyramidal	2	146	475.636	Point 15	888.918	-809.499	228.046	no cnx
2019_08_28_exp1_TH	3	pyramidal	2	146	475.636	Point 14	820.374	-748.8	228.046	no cnx
2019_08_28_exp1_TH	3	pyramidal	2	146	475.636	Point 17	817.8	-779.84	228.046	no cnx
2019_08_28_exp1_TH	3	pyramidal	2	146	475.636	Point 16	938.334	-788.878	228.046	no cnx
2019_08_28_exp1_TH	3	pyramidal	2	146	475.636	Point 19	917.276	-660.996	228.046	no cnx
2019_08_28_exp1_TH	3	pyramidal	2	146	475.636	Point 18	821.349	-671.131	228.046	no cnx
2019_08_28_exp1_TH	3	pyramidal	2	146	475.636	Point 31	796.183	-807.615	204.706	no cnx
2019_08_28_exp1_TH	3	pyramidal	2	146	475.636	Point 30	930.858	-798.122	204.706	no cnx
2019_08_28_exp1_TH	3	pyramidal	2	146	475.636	Point 34	855.035	-760.376	204.706	no cnx
2019_08_28_exp1_TH	3	pyramidal	2	146	475.636	Point 5	867.721	-633.355	237.496	no cnx
2019_08_28_exp1_TH	3	pyramidal	2	146	475.636	Point 4	835.523	-606.976	237.496	no cnx
2019_08_28_exp1_TH	3	pyramidal	2	146	475.636	Point 7	865.649	-595.338	237.496	no cnx
2019_08_28_exp1_TH	3	pyramidal	2	146	475.636	Point 6	875.931	-675.454	237.496	no cnx
2019_08_28_exp1_TH	3	pyramidal	2	146	475.636	Point 1	922.57	-464.268	266.006	no cnx
2019_08_28_exp1_TH	3	pyramidal	2	146	475.636	Point 3	735.288	-397.165	266.006	no cnx
2019_08_28_exp1_TH	3	pyramidal	2	146	475.636	Point 2	840.568	-444.661	266.006	no cnx
2019_08_28_exp1_TH	3	pyramidal	2	146	475.636	Point 9	888.296	-641.544	237.496	no cnx
2019_08_28_exp1_TH	3	pyramidal	2	146	475.636	Point 8	904.016	-507.336	237.496	no cnx
2019_08_28_exp1_TH	3	pyramidal	2	146	475.636	Point 32	908.496	-826.52	204.706	no cnx
2019_08_28_exp1_TH	3	pyramidal	2	146	475.636	Point 28	892.59	-829.207	204.706	no cnx
2019_08_28_exp1_TH	3	pyramidal	2	146	475.636	Point 29	933.733	-870.847	204.706	no cnx
2019_08_28_exp1_TH	3	pyramidal	2	146	475.636	Point 20	924.878	-789.289	224.276	no cnx
2019_08_28_exp1_TH	3	pyramidal	2	146	475.636	Point 21	889.319	-791.367	224.276	no cnx
2019_08_28_exp1_TH	3	pyramidal	2	146	475.636	Point 22	819.958	-661.664	224.276	no cnx
2019_08_28_exp1_TH	3	pyramidal	2	146	475.636	Point 23	863.757	-833.667	207.026	no cnx
2019_08_28_exp1_TH	3	pyramidal	2	146	475.636	Point 24	812.107	-860.345	207.026	no cnx
2019_08_28_exp1_TH	3	pyramidal	2	146	475.636	Point 25	861.176	-823.715	207.026	no cnx
2019_08_28_exp1_TH	3	pyramidal	2	146	475.636	Point 26	910.491	-796.286	207.026	no cnx
2019_08_28_exp1_TH	3	pyramidal	2	146	475.636	Point 27	950.022	-865.683	207.026	no cnx
2019_08_28_exp1_TH	3	pyramidal	2	146	475.636	Point 33	804.121	-814.659	204.706	no cnx
2019_08_28_exp1_TH	1	pyramidal	2	103	475.766	Point 11	906.421	-485.824	242.316	no cnx
2019_08_28_exp1_TH	1	pyramidal	2	103	475.766	Point 10	942.032	-443.614	242.316	no cnx
2019_08_28_exp1_TH	1	pyramidal	2	103	475.766	Point 13	828.754	-573.501	242.316	no cnx
2019_08_28_exp1_TH	1	pyramidal	2	103	475.766	Point 12	804.204	-438.548	242.316	no cnx
2019_08_28_exp1_TH	1	pyramidal	2	103	475.766	Point 15	880.685	-582.295	228.046	no cnx
2019_08_28_exp1_TH	1	pyramidal	2	103	475.766	Point 14	812.141	-521.596	228.046	no cnx
2019_08_28_exp1_TH	1	pyramidal	2	103	475.766	Point 17	809.567	-552.636	228.046	no cnx
2019_08_28_exp1_TH	1	pyramidal	2	103	475.766	Point 16	930.101	-561.674	228.046	no cnx
2019_08_28_exp1_TH	1	pyramidal	2	103	475.766	Point 19	909.043	-433.792	228.046	no cnx
2019_08_28_exp1_TH	1	pyramidal	2	103	475.766	Point 18	813.116	-443.927	228.046	no cnx
2019_08_28_exp1_TH	1	pyramidal	2	103	475.766	Point 31	787.95	-580.411	204.706	no cnx
2019_08_28_exp1_TH	1	pyramidal	2	103	475.766	Point 30	922.625	-570.918	204.706	no cnx
2019_08_28_exp1_TH	1	pyramidal	2	103	475.766	Point 34	846.802	-533.172	204.706	no cnx
2019_08_28_exp1_TH	1	pyramidal	2	103	475.766	Point 5	859.488	-406.151	237.496	no cnx
2019_08_28_exp1_TH	1	pyramidal	2	103	475.766	Point 4	827.29	-379.772	237.496	no cnx
2019_08_28_exp1_TH	1	pyramidal	2	103	475.766	Point 7	857.416	-368.134	237.496	no cnx
2019_08_28_exp1_TH	1	pyramidal	2	103	475.766	Point 6	867.698	-448.25	237.496	no cnx
2019_08_28_exp1_TH	1	pyramidal	2	103	475.766	Point 1	914.337	-237.064	266.006	no cnx
2019_08_28_exp1_TH	1	pyramidal	2	103	475.766	Point 3	727.055	-169.961	266.006	no cnx
2019_08_28_exp1_TH	1	pyramidal	2	103	475.766	Point 2	832.335	-217.457	266.006	no cnx
2019_08_28_exp1_TH	1	pyramidal	2	103	475.766	Point 9	880.063	-414.34	237.496	no cnx
2019_08_28_exp1_TH	1	pyramidal	2	103	475.766	Point 8	895.783	-280.132	237.496	no cnx
2019_08_28_exp1_TH	1	pyramidal	2	103	475.766	Point 32	900.263	-599.316	204.706	no cnx
2019_08_28_exp1_TH	1	pyramidal	2	103	475.766	Point 28	884.357	-602.003	204.706	no cnx
2019_08_28_exp1_TH	1	pyramidal	2	103	475.766	Point 29	925.5	-643.643	204.706	no cnx
2019_08_28_exp1_TH	1	pyramidal	2	103	475.766	Point 20	916.645	-562.085	224.276	no cnx
2019_08_28_exp1_TH	1	pyramidal	2	103	475.766	Point 21	881.086	-564.164	224.276	no cnx
2019_08_28_exp1_TH	1	pyramidal	2	103	475.766	Point 22	811.725	-434.46	224.276	no cnx
2019_08_28_exp1_TH	1	pyramidal	2	103	475.766	Point 23	855.524	-606.463	207.026	no cnx
2019_08_28_exp1_TH	1	pyramidal	2	103	475.766	Point 24	803.874	-633.141	207.026	no cnx
2019_08_28_exp1_TH	1	pyramidal	2	103	475.766	Point 25	852.943	-596.511	207.026	no cnx
2019_08_28_exp1_TH	1	pyramidal	2	103	475.766	Point 26	902.258	-569.082	207.026	no cnx
2019_08_28_exp1_TH	1	pyramidal	2	103	475.766	Point 27	941.789	-638.479	207.026	no cnx
2019_08_28_exp1_TH	1	pyramidal	2	103	475.766	Point 33	795.888	-587.455	204.706	no cnx
2019_08_28_exp1_TH	0	pyramidal	2	159	475.866	Point 11	920.218	-423.94	242.316	no cnx
2019_08_28_exp1_TH	0	pyramidal	2	159	475.866	Point 10	955.829	-381.729	242.316	no cnx
2019_08_28_exp1_TH	0	pyramidal	2	159	475.866	Point 13	842.551	-511.616	242.316	no cnx
2019_08_28_exp1_TH	0	pyramidal	2	159	475.866	Point 12	818.001	-376.663	242.316	no cnx
2019_08_28_exp1_TH	0	pyramidal	2	159	475.866	Point 15	894.482	-520.41	228.046	no cnx
2019_08_28_exp1_TH	0	pyramidal	2	159	475.866	Point 14	825.938	-459.711	228.046	no cnx
2019_08_28_exp1_TH	0	pyramidal	2	159	475.866	Point 17	823.364	-490.751	228.046	no cnx
2019_08_28_exp1_TH	0	pyramidal	2	159	475.866	Point 16	943.899	-499.789	228.046	no cnx
2019_08_28_exp1_TH	0	pyramidal	2	159	475.866	Point 19	922.84	-371.907	228.046	no cnx
2019_08_28_exp1_TH	0	pyramidal	2	159	475.866	Point 18	826.913	-382.042	228.046	no cnx
2019_08_28_exp1_TH	0	pyramidal	2	159	475.866	Point 31	801.747	-518.526	204.706	no cnx
2019_08_28_exp1_TH	0	pyramidal	2	159	475.866	Point 30	936.422	-509.034	204.706	no cnx
2019_08_28_exp1_TH	0	pyramidal	2	159	475.866	Point 34	860.599	-471.287	204.706	no cnx
2019_08_28_exp1_TH	0	pyramidal	2	159	475.866	Point 5	873.285	-344.266	237.496	no cnx
2019_08_28_exp1_TH	0	pyramidal	2	159	475.866	Point 4	841.087	-317.887	237.496	no cnx
2019_08_28_exp1_TH	0	pyramidal	2	159	475.866	Point 7	871.213	-306.249	237.496	no cnx
2019_08_28_exp1_TH	0	pyramidal	2	159	475.866	Point 6	881.496	-386.365	237.496	no cnx
2019_08_28_exp1_TH	0	pyramidal	2	159	475.866	Point 1	928.134	-175.179	266.006	no cnx
2019_08_28_exp1_TH	0	pyramidal	2	159	475.866	Point 3	740.852	-108.076	266.006	no cnx
2019_08_28_exp1_TH	0	pyramidal	2	159	475.866	Point 2	846.132	-155.572	266.006	no cnx
2019_08_28_exp1_TH	0	pyramidal	2	159	475.866	Point 9	893.86	-352.455	237.496	no cnx
2019_08_28_exp1_TH	0	pyramidal	2	159	475.866	Point 8	909.58	-218.247	237.496	no cnx
2019_08_28_exp1_TH	0	pyramidal	2	159	475.866	Point 32	914.06	-537.432	204.706	no cnx
2019_08_28_exp1_TH	0	pyramidal	2	159	475.866	Point 28	898.154	-540.118	204.706	no cnx
2019_08_28_exp1_TH	0	pyramidal	2	159	475.866	Point 29	939.297	-581.758	204.706	no cnx
2019_08_28_exp1_TH	0	pyramidal	2	159	475.866	Point 20	930.442	-500.2	224.276	no cnx
2019_08_28_exp1_TH	0	pyramidal	2	159	475.866	Point 21	894.883	-502.279	224.276	no cnx
2019_08_28_exp1_TH	0	pyramidal	2	159	475.866	Point 22	825.522	-372.575	224.276	no cnx
2019_08_28_exp1_TH	0	pyramidal	2	159	475.866	Point 23	869.321	-544.579	207.026	no cnx
2019_08_28_exp1_TH	0	pyramidal	2	159	475.866	Point 24	817.671	-571.256	207.026	no cnx
2019_08_28_exp1_TH	0	pyramidal	2	159	475.866	Point 25	866.74	-534.626	207.026	no cnx
2019_08_28_exp1_TH	0	pyramidal	2	159	475.866	Point 26	916.055	-507.197	207.026	no cnx
2019_08_28_exp1_TH	0	pyramidal	2	159	475.866	Point 27	955.586	-576.594	207.026	no cnx
2019_08_28_exp1_TH	0	pyramidal	2	159	475.866	Point 33	809.685	-525.57	204.706	no cnx
2019_05_09_exp1_TH	2	pyramidal	2	252	360.095	Point 55	1008.24	-414.997	305.155	no cnx
2019_05_09_exp1_TH	2	pyramidal	2	252	360.095	Point 54	945.041	-486.416	305.155	no cnx
2019_05_09_exp1_TH	2	pyramidal	2	252	360.095	Point 57	1036.49	-411.259	305.155	no cnx
2019_05_09_exp1_TH	2	pyramidal	2	252	360.095	Point 56	1039.56	-507.817	305.155	no cnx
2019_05_09_exp1_TH	2	pyramidal	2	252	360.095	Point 51	1000.75	-296.726	305.155	no cnx
2019_05_09_exp1_TH	2	pyramidal	2	252	360.095	Point 50	926.358	-549.925	305.155	no cnx
2019_05_09_exp1_TH	2	pyramidal	2	252	360.095	Point 53	1003.66	-386.411	305.155	no cnx
2019_05_09_exp1_TH	2	pyramidal	2	252	360.095	Point 52	955.201	-541.075	305.155	no cnx
2019_05_09_exp1_TH	2	pyramidal	2	252	360.095	Point 11	903.498	-21.0912	358.155	no cnx
2019_05_09_exp1_TH	2	pyramidal	2	252	360.095	Point 10	950.852	-0.347348	358.155	no cnx
2019_05_09_exp1_TH	2	pyramidal	2	252	360.095	Point 13	918.273	109.263	352.125	no cnx
2019_05_09_exp1_TH	2	pyramidal	2	252	360.095	Point 12	864.776	94.9118	358.155	no cnx
2019_05_09_exp1_TH	2	pyramidal	2	252	360.095	Point 15	930.065	158.029	352.125	no cnx
2019_05_09_exp1_TH	2	pyramidal	2	252	360.095	Point 14	960.986	82.3919	352.125	no cnx
2019_05_09_exp1_TH	2	pyramidal	2	252	360.095	Point 17	909.35	181.975	326.265	no cnx
2019_05_09_exp1_TH	2	pyramidal	2	252	360.095	Point 16	876.995	145.772	352.125	no cnx
2019_05_09_exp1_TH	2	pyramidal	2	252	360.095	Point 19	846.399	85.4604	326.265	no cnx
2019_05_09_exp1_TH	2	pyramidal	2	252	360.095	Point 18	838.157	-37.7107	326.265	no cnx
2019_05_09_exp1_TH	2	pyramidal	2	252	360.095	Point 31	953.841	64.4537	311.755	no cnx
2019_05_09_exp1_TH	2	pyramidal	2	252	360.095	Point 30	873.06	3.6442	311.755	no cnx
2019_05_09_exp1_TH	2	pyramidal	2	252	360.095	Point 37	891.355	-217.551	324.995	no cnx
2019_05_09_exp1_TH	2	pyramidal	2	252	360.095	Point 36	990.818	-309.027	324.995	no cnx
2019_05_09_exp1_TH	2	pyramidal	2	252	360.095	Point 35	910.925	-253.615	324.995	no cnx
2019_05_09_exp1_TH	2	pyramidal	2	252	360.095	Point 34	818.506	33.7744	305.935	no cnx
2019_05_09_exp1_TH	2	pyramidal	2	252	360.095	Point 5	904.909	-8.2544	369.115	no cnx
2019_05_09_exp1_TH	2	pyramidal	2	252	360.095	Point 4	873.073	111.318	377.795	no cnx
2019_05_09_exp1_TH	2	pyramidal	2	252	360.095	Point 7	971.009	178.239	369.115	no cnx
2019_05_09_exp1_TH	2	pyramidal	2	252	360.095	Point 6	893.473	101.389	369.115	no cnx
2019_05_09_exp1_TH	2	pyramidal	2	252	360.095	Point 1	821.675	236.514	377.795	no cnx
2019_05_09_exp1_TH	2	pyramidal	2	252	360.095	Point 3	813.764	138.042	377.795	no cnx
2019_05_09_exp1_TH	2	pyramidal	2	252	360.095	Point 2	852.779	173.449	377.795	no cnx
2019_05_09_exp1_TH	2	pyramidal	2	252	360.095	Point 9	857.224	-23.8386	358.155	no cnx
2019_05_09_exp1_TH	2	pyramidal	2	252	360.095	Point 8	859.338	223.547	369.115	no cnx
2019_05_09_exp1_TH	2	pyramidal	2	252	360.095	Point 32	818.168	63.5425	305.935	no cnx
2019_05_09_exp1_TH	2	pyramidal	2	252	360.095	Point 48	880.955	-529.756	305.155	no cnx
2019_05_09_exp1_TH	2	pyramidal	2	252	360.095	Point 49	1009.58	-340.152	305.155	no cnx
2019_05_09_exp1_TH	2	pyramidal	2	252	360.095	Point 42	1004.02	-521.648	324.625	no cnx
2019_05_09_exp1_TH	2	pyramidal	2	252	360.095	Point 43	980.149	-438.14	324.625	no cnx
2019_05_09_exp1_TH	2	pyramidal	2	252	360.095	Point 40	922.405	-114.747	324.995	no cnx
2019_05_09_exp1_TH	2	pyramidal	2	252	360.095	Point 41	963.636	-190.146	324.995	no cnx
2019_05_09_exp1_TH	2	pyramidal	2	252	360.095	Point 46	921.57	-361.129	324.625	no cnx
2019_05_09_exp1_TH	2	pyramidal	2	252	360.095	Point 47	905.953	-308.444	324.625	no cnx
2019_05_09_exp1_TH	2	pyramidal	2	252	360.095	Point 44	1044.5	-523.791	324.625	no cnx
2019_05_09_exp1_TH	2	pyramidal	2	252	360.095	Point 45	988.64	-487.265	324.625	no cnx
2019_05_09_exp1_TH	2	pyramidal	2	252	360.095	Point 28	794.804	23.8521	311.755	no cnx
2019_05_09_exp1_TH	2	pyramidal	2	252	360.095	Point 29	822.28	-17.5315	311.755	no cnx
2019_05_09_exp1_TH	2	pyramidal	2	252	360.095	Point 20	967.28	88.6175	326.265	no cnx
2019_05_09_exp1_TH	2	pyramidal	2	252	360.095	Point 21	932.135	175.72	326.265	no cnx
2019_05_09_exp1_TH	2	pyramidal	2	252	360.095	Point 22	923.804	144.528	326.275	no cnx
2019_05_09_exp1_TH	2	pyramidal	2	252	360.095	Point 23	962.337	131.591	326.275	no cnx
2019_05_09_exp1_TH	2	pyramidal	2	252	360.095	Point 24	880.664	-78.8168	317.845	no cnx
2019_05_09_exp1_TH	2	pyramidal	2	252	360.095	Point 25	831.033	51.993	317.845	no cnx
2019_05_09_exp1_TH	2	pyramidal	2	252	360.095	Point 26	897.687	-71.5451	317.845	no cnx
2019_05_09_exp1_TH	2	pyramidal	2	252	360.095	Point 27	942.518	92.7328	317.845	no cnx
2019_05_09_exp1_TH	2	pyramidal	2	252	360.095	Point 39	949.422	-231.617	324.995	no cnx
2019_05_09_exp1_TH	2	pyramidal	2	252	360.095	Point 33	859.631	0.283676	305.935	no cnx
2019_05_09_exp1_TH	2	pyramidal	2	252	360.095	Point 38	992.519	-147.267	324.995	no cnx
2019_05_09_exp1_TH	0	pyramidal	2	266	366.015	Point 55	1005.8	-207.214	305.155	no cnx
2019_05_09_exp1_TH	0	pyramidal	2	266	366.015	Point 54	942.607	-278.633	305.155	no cnx
2019_05_09_exp1_TH	0	pyramidal	2	266	366.015	Point 57	1034.05	-203.476	305.155	no cnx
2019_05_09_exp1_TH	0	pyramidal	2	266	366.015	Point 56	1037.12	-300.034	305.155	no cnx
2019_05_09_exp1_TH	0	pyramidal	2	266	366.015	Point 51	998.318	-88.9429	305.155	no cnx
2019_05_09_exp1_TH	0	pyramidal	2	266	366.015	Point 50	923.925	-342.142	305.155	no cnx
2019_05_09_exp1_TH	0	pyramidal	2	266	366.015	Point 53	1001.23	-178.628	305.155	no cnx
2019_05_09_exp1_TH	0	pyramidal	2	266	366.015	Point 52	952.768	-333.292	305.155	no cnx
2019_05_09_exp1_TH	0	pyramidal	2	266	366.015	Point 11	901.065	186.692	358.155	no cnx
2019_05_09_exp1_TH	0	pyramidal	2	266	366.015	Point 10	948.419	207.436	358.155	no cnx
2019_05_09_exp1_TH	0	pyramidal	2	266	366.015	Point 13	915.839	317.046	352.125	no cnx
2019_05_09_exp1_TH	0	pyramidal	2	266	366.015	Point 12	862.343	302.695	358.155	no cnx
2019_05_09_exp1_TH	0	pyramidal	2	266	366.015	Point 15	927.631	365.812	352.125	no cnx
2019_05_09_exp1_TH	0	pyramidal	2	266	366.015	Point 14	958.553	290.175	352.125	no cnx
2019_05_09_exp1_TH	0	pyramidal	2	266	366.015	Point 17	906.917	389.758	326.265	no cnx
2019_05_09_exp1_TH	0	pyramidal	2	266	366.015	Point 16	874.562	353.555	352.125	no cnx
2019_05_09_exp1_TH	0	pyramidal	2	266	366.015	Point 19	843.966	293.243	326.265	no cnx
2019_05_09_exp1_TH	0	pyramidal	2	266	366.015	Point 18	835.724	170.072	326.265	no cnx
2019_05_09_exp1_TH	0	pyramidal	2	266	366.015	Point 31	951.408	272.237	311.755	no cnx
2019_05_09_exp1_TH	0	pyramidal	2	266	366.015	Point 30	870.627	211.427	311.755	no cnx
2019_05_09_exp1_TH	0	pyramidal	2	266	366.015	Point 37	888.922	-9.76808	324.995	no cnx
2019_05_09_exp1_TH	0	pyramidal	2	266	366.015	Point 36	988.385	-101.244	324.995	no cnx
2019_05_09_exp1_TH	0	pyramidal	2	266	366.015	Point 35	908.491	-45.8316	324.995	no cnx
2019_05_09_exp1_TH	0	pyramidal	2	266	366.015	Point 34	816.073	241.557	305.935	no cnx
2019_05_09_exp1_TH	0	pyramidal	2	266	366.015	Point 5	902.476	199.529	369.115	no cnx
2019_05_09_exp1_TH	0	pyramidal	2	266	366.015	Point 4	870.639	319.101	377.795	no cnx
2019_05_09_exp1_TH	0	pyramidal	2	266	366.015	Point 7	968.575	386.021	369.115	no cnx
2019_05_09_exp1_TH	0	pyramidal	2	266	366.015	Point 6	891.039	309.172	369.115	no cnx
2019_05_09_exp1_TH	0	pyramidal	2	266	366.015	Point 1	819.242	444.297	377.795	no cnx
2019_05_09_exp1_TH	0	pyramidal	2	266	366.015	Point 3	811.33	345.824	377.795	no cnx
2019_05_09_exp1_TH	0	pyramidal	2	266	366.015	Point 2	850.346	381.232	377.795	no cnx
2019_05_09_exp1_TH	0	pyramidal	2	266	366.015	Point 9	854.791	183.944	358.155	no cnx
2019_05_09_exp1_TH	0	pyramidal	2	266	366.015	Point 8	856.904	431.33	369.115	no cnx
2019_05_09_exp1_TH	0	pyramidal	2	266	366.015	Point 32	815.735	271.325	305.935	no cnx
2019_05_09_exp1_TH	0	pyramidal	2	266	366.015	Point 48	878.521	-321.973	305.155	no cnx
2019_05_09_exp1_TH	0	pyramidal	2	266	366.015	Point 49	1007.15	-132.369	305.155	no cnx
2019_05_09_exp1_TH	0	pyramidal	2	266	366.015	Point 42	1001.59	-313.865	324.625	no cnx
2019_05_09_exp1_TH	0	pyramidal	2	266	366.015	Point 43	977.716	-230.357	324.625	no cnx
2019_05_09_exp1_TH	0	pyramidal	2	266	366.015	Point 40	919.971	93.0356	324.995	no cnx
2019_05_09_exp1_TH	0	pyramidal	2	266	366.015	Point 41	961.202	17.6373	324.995	no cnx
2019_05_09_exp1_TH	0	pyramidal	2	266	366.015	Point 46	919.137	-153.346	324.625	no cnx
2019_05_09_exp1_TH	0	pyramidal	2	266	366.015	Point 47	903.52	-100.661	324.625	no cnx
2019_05_09_exp1_TH	0	pyramidal	2	266	366.015	Point 44	1042.07	-316.008	324.625	no cnx
2019_05_09_exp1_TH	0	pyramidal	2	266	366.015	Point 45	986.206	-279.482	324.625	no cnx
2019_05_09_exp1_TH	0	pyramidal	2	266	366.015	Point 28	792.37	231.635	311.755	no cnx
2019_05_09_exp1_TH	0	pyramidal	2	266	366.015	Point 29	819.847	190.251	311.755	no cnx
2019_05_09_exp1_TH	0	pyramidal	2	266	366.015	Point 20	964.847	296.4	326.265	no cnx
2019_05_09_exp1_TH	0	pyramidal	2	266	366.015	Point 21	929.702	383.503	326.265	no cnx
2019_05_09_exp1_TH	0	pyramidal	2	266	366.015	Point 22	921.37	352.311	326.275	no cnx
2019_05_09_exp1_TH	0	pyramidal	2	266	366.015	Point 23	959.903	339.374	326.275	no cnx
2019_05_09_exp1_TH	0	pyramidal	2	266	366.015	Point 24	878.23	128.966	317.845	no cnx
2019_05_09_exp1_TH	0	pyramidal	2	266	366.015	Point 25	828.6	259.776	317.845	no cnx
2019_05_09_exp1_TH	0	pyramidal	2	266	366.015	Point 26	895.253	136.238	317.845	no cnx
2019_05_09_exp1_TH	0	pyramidal	2	266	366.015	Point 27	940.084	300.516	317.845	no cnx
2019_05_09_exp1_TH	0	pyramidal	2	266	366.015	Point 39	946.989	-23.8341	324.995	no cnx
2019_05_09_exp1_TH	0	pyramidal	2	266	366.015	Point 33	857.197	208.067	305.935	no cnx
2019_05_09_exp1_TH	0	pyramidal	2	266	366.015	Point 38	990.086	60.5161	324.995	no cnx
2019_04_17_exp2_TH	3	pyramidal	2	325	124.235	Point 59	711.348	406.009	148.99	no cnx
2019_04_17_exp2_TH	3	pyramidal	2	325	124.235	Point 58	803.844	406.674	148.99	no cnx
2019_04_17_exp2_TH	3	pyramidal	2	325	124.235	Point 55	839.553	508.313	155.34	no cnx
2019_04_17_exp2_TH	3	pyramidal	2	325	124.235	Point 54	713.719	436.857	155.34	no cnx
2019_04_17_exp2_TH	3	pyramidal	2	325	124.235	Point 57	875.396	495.916	148.99	no cnx
2019_04_17_exp2_TH	3	pyramidal	2	325	124.235	Point 56	769.924	445.647	148.99	no cnx
2019_04_17_exp2_TH	3	pyramidal	2	325	124.235	Point 51	912.817	473.852	155.34	no cnx
2019_04_17_exp2_TH	3	pyramidal	2	325	124.235	Point 50	833.745	296.428	155.34	no cnx
2019_04_17_exp2_TH	3	pyramidal	2	325	124.235	Point 53	819.194	363.602	155.34	no cnx
2019_04_17_exp2_TH	3	pyramidal	2	325	124.235	Point 52	816.103	449.442	155.34	no cnx
2019_04_17_exp2_TH	3	pyramidal	2	325	124.235	Point 11	754.754	108.331	169.175	no cnx
2019_04_17_exp2_TH	3	pyramidal	2	325	124.235	Point 10	725.652	198.028	169.175	no cnx
2019_04_17_exp2_TH	3	pyramidal	2	325	124.235	Point 13	762.26	137.068	169.175	no cnx
2019_04_17_exp2_TH	3	pyramidal	2	325	124.235	Point 12	833.568	198.906	169.175	no cnx
2019_04_17_exp2_TH	3	pyramidal	2	325	124.235	Point 15	854.677	45.224	169.175	no cnx
2019_04_17_exp2_TH	3	pyramidal	2	325	124.235	Point 14	879.072	204.403	169.175	no cnx
2019_04_17_exp2_TH	3	pyramidal	2	325	124.235	Point 17	730.835	131.923	152.595	no cnx
2019_04_17_exp2_TH	3	pyramidal	2	325	124.235	Point 16	878.339	26.0554	168.785	no cnx
2019_04_17_exp2_TH	3	pyramidal	2	325	124.235	Point 19	870.929	49.0387	152.595	no cnx
2019_04_17_exp2_TH	3	pyramidal	2	325	124.235	Point 18	846.148	126.507	152.595	no cnx
2019_04_17_exp2_TH	3	pyramidal	2	325	124.235	Point 31	759.694	201.884	131.865	no cnx
2019_04_17_exp2_TH	3	pyramidal	2	325	124.235	Point 30	830.783	224.949	131.865	no cnx
2019_04_17_exp2_TH	3	pyramidal	2	325	124.235	Point 37	836.302	-20.4093	115.78	no cnx
2019_04_17_exp2_TH	3	pyramidal	2	325	124.235	Point 36	796.814	-29.7463	115.78	no cnx
2019_04_17_exp2_TH	3	pyramidal	2	325	124.235	Point 35	712.208	-4.18665	115.78	no cnx
2019_04_17_exp2_TH	3	pyramidal	2	325	124.235	Point 34	853.479	118.272	115.78	no cnx
2019_04_17_exp2_TH	3	pyramidal	2	325	124.235	Point 5	815.146	-25.7226	179.115	no cnx
2019_04_17_exp2_TH	3	pyramidal	2	325	124.235	Point 4	879.068	19.2068	184.555	no cnx
2019_04_17_exp2_TH	3	pyramidal	2	325	124.235	Point 7	843.248	138.202	179.115	no cnx
2019_04_17_exp2_TH	3	pyramidal	2	325	124.235	Point 6	818.734	112.533	179.115	no cnx
2019_04_17_exp2_TH	3	pyramidal	2	325	124.235	Point 1	753.426	184.678	184.555	no cnx
2019_04_17_exp2_TH	3	pyramidal	2	325	124.235	Point 3	778.164	65.8277	184.555	no cnx
2019_04_17_exp2_TH	3	pyramidal	2	325	124.235	Point 2	840.613	84.855	184.555	no cnx
2019_04_17_exp2_TH	3	pyramidal	2	325	124.235	Point 9	834.664	215.478	169.175	no cnx
2019_04_17_exp2_TH	3	pyramidal	2	325	124.235	Point 8	842.984	43.883	179.115	no cnx
2019_04_17_exp2_TH	3	pyramidal	2	325	124.235	Point 32	820.74	70.0634	131.865	no cnx
2019_04_17_exp2_TH	3	pyramidal	2	325	124.235	Point 48	830.346	484.654	160.03	no cnx
2019_04_17_exp2_TH	3	pyramidal	2	325	124.235	Point 49	868.56	272.472	160.03	no cnx
2019_04_17_exp2_TH	3	pyramidal	2	325	124.235	Point 42	826.678	201.687	106.55	no cnx
2019_04_17_exp2_TH	3	pyramidal	2	325	124.235	Point 43	903.012	495.897	160.03	no cnx
2019_04_17_exp2_TH	3	pyramidal	2	325	124.235	Point 40	746.222	121.421	106.55	no cnx
2019_04_17_exp2_TH	3	pyramidal	2	325	124.235	Point 41	780.039	21.6031	106.55	no cnx
2019_04_17_exp2_TH	3	pyramidal	2	325	124.235	Point 46	855.666	332.065	160.03	no cnx
2019_04_17_exp2_TH	3	pyramidal	2	325	124.235	Point 47	908.229	484.439	160.03	no cnx
2019_04_17_exp2_TH	3	pyramidal	2	325	124.235	Point 44	767.196	412.584	160.03	no cnx
2019_04_17_exp2_TH	3	pyramidal	2	325	124.235	Point 45	725.447	461.248	160.03	no cnx
2019_04_17_exp2_TH	3	pyramidal	2	325	124.235	Point 28	755.726	191.332	131.855	no cnx
2019_04_17_exp2_TH	3	pyramidal	2	325	124.235	Point 29	837.498	129.823	131.865	no cnx
2019_04_17_exp2_TH	3	pyramidal	2	325	124.235	Point 60	791.7	299.11	148.99	no cnx
2019_04_17_exp2_TH	3	pyramidal	2	325	124.235	Point 20	755.681	77.8152	152.595	no cnx
2019_04_17_exp2_TH	3	pyramidal	2	325	124.235	Point 21	831.376	-25.618	152.595	no cnx
2019_04_17_exp2_TH	3	pyramidal	2	325	124.235	Point 22	734.627	37.1566	152.595	no cnx
2019_04_17_exp2_TH	3	pyramidal	2	325	124.235	Point 23	720.734	106.646	152.595	no cnx
2019_04_17_exp2_TH	3	pyramidal	2	325	124.235	Point 24	810.242	187.93	139.585	no cnx
2019_04_17_exp2_TH	3	pyramidal	2	325	124.235	Point 25	797.261	118.714	139.585	no cnx
2019_04_17_exp2_TH	3	pyramidal	2	325	124.235	Point 26	783.257	62.4805	139.585	no cnx
2019_04_17_exp2_TH	3	pyramidal	2	325	124.235	Point 27	718.492	117.914	139.585	no cnx
2019_04_17_exp2_TH	3	pyramidal	2	325	124.235	Point 39	755.031	64.6599	106.55	no cnx
2019_04_17_exp2_TH	3	pyramidal	2	325	124.235	Point 33	732.361	96.9316	115.78	no cnx
2019_04_17_exp2_TH	3	pyramidal	2	325	124.235	Point 38	750.052	-19.5373	106.55	no cnx
2019_04_17_exp2_TH	2	pyramidal	2	235	141.385	Point 55	828.647	420.262	155.34	no cnx
2019_04_17_exp2_TH	2	pyramidal	2	235	141.385	Point 54	702.814	348.806	155.34	no cnx
2019_04_17_exp2_TH	2	pyramidal	2	235	141.385	Point 51	901.911	385.801	155.34	no cnx
2019_04_17_exp2_TH	2	pyramidal	2	235	141.385	Point 50	822.839	208.377	155.34	no cnx
2019_04_17_exp2_TH	2	pyramidal	2	235	141.385	Point 53	808.289	275.552	155.34	no cnx
2019_04_17_exp2_TH	2	pyramidal	2	235	141.385	Point 52	805.198	361.392	155.34	no cnx
2019_04_17_exp2_TH	2	pyramidal	2	235	141.385	Point 11	743.849	20.2807	169.175	no cnx
2019_04_17_exp2_TH	2	pyramidal	2	235	141.385	Point 10	714.746	109.977	169.175	no cnx
2019_04_17_exp2_TH	2	pyramidal	2	235	141.385	Point 13	751.355	49.0169	169.175	no cnx
2019_04_17_exp2_TH	2	pyramidal	2	235	141.385	Point 12	822.663	110.855	169.175	no cnx
2019_04_17_exp2_TH	2	pyramidal	2	235	141.385	Point 15	843.772	-42.8268	169.175	no cnx
2019_04_17_exp2_TH	2	pyramidal	2	235	141.385	Point 14	868.166	116.352	169.175	no cnx
2019_04_17_exp2_TH	2	pyramidal	2	235	141.385	Point 17	719.93	43.8727	152.595	no cnx
2019_04_17_exp2_TH	2	pyramidal	2	235	141.385	Point 16	867.434	-61.9954	168.785	no cnx
2019_04_17_exp2_TH	2	pyramidal	2	235	141.385	Point 19	860.023	-39.0121	152.595	no cnx
2019_04_17_exp2_TH	2	pyramidal	2	235	141.385	Point 18	835.243	38.4562	152.595	no cnx
2019_04_17_exp2_TH	2	pyramidal	2	235	141.385	Point 31	748.789	113.833	131.865	no cnx
2019_04_17_exp2_TH	2	pyramidal	2	235	141.385	Point 30	819.878	136.898	131.865	no cnx
2019_04_17_exp2_TH	2	pyramidal	2	235	141.385	Point 37	825.397	-108.46	115.78	no cnx
2019_04_17_exp2_TH	2	pyramidal	2	235	141.385	Point 36	785.909	-117.797	115.78	no cnx
2019_04_17_exp2_TH	2	pyramidal	2	235	141.385	Point 35	701.303	-92.2374	115.78	no cnx
2019_04_17_exp2_TH	2	pyramidal	2	235	141.385	Point 34	842.574	30.2208	115.78	no cnx
2019_04_17_exp2_TH	2	pyramidal	2	235	141.385	Point 5	804.241	-113.773	179.115	no cnx
2019_04_17_exp2_TH	2	pyramidal	2	235	141.385	Point 4	868.162	-68.844	184.555	no cnx
2019_04_17_exp2_TH	2	pyramidal	2	235	141.385	Point 7	832.342	50.151	179.115	no cnx
2019_04_17_exp2_TH	2	pyramidal	2	235	141.385	Point 6	807.829	24.482	179.115	no cnx
2019_04_17_exp2_TH	2	pyramidal	2	235	141.385	Point 1	742.521	96.6267	184.555	no cnx
2019_04_17_exp2_TH	2	pyramidal	2	235	141.385	Point 3	767.259	-22.2231	184.555	no cnx
2019_04_17_exp2_TH	2	pyramidal	2	235	141.385	Point 2	829.707	-3.19576	184.555	no cnx
2019_04_17_exp2_TH	2	pyramidal	2	235	141.385	Point 9	823.759	127.427	169.175	no cnx
2019_04_17_exp2_TH	2	pyramidal	2	235	141.385	Point 8	832.078	-44.1678	179.115	no cnx
2019_04_17_exp2_TH	2	pyramidal	2	235	141.385	Point 32	809.834	-17.9874	131.865	no cnx
2019_04_17_exp2_TH	2	pyramidal	2	235	141.385	Point 48	819.44	396.603	160.03	no cnx
2019_04_17_exp2_TH	2	pyramidal	2	235	141.385	Point 49	857.655	184.421	160.03	no cnx
2019_04_17_exp2_TH	2	pyramidal	2	235	141.385	Point 42	815.772	113.636	106.55	no cnx
2019_04_17_exp2_TH	2	pyramidal	2	235	141.385	Point 43	892.107	407.846	160.03	no cnx
2019_04_17_exp2_TH	2	pyramidal	2	235	141.385	Point 40	735.317	33.3706	106.55	no cnx
2019_04_17_exp2_TH	2	pyramidal	2	235	141.385	Point 41	769.134	-66.4477	106.55	no cnx
2019_04_17_exp2_TH	2	pyramidal	2	235	141.385	Point 46	844.761	244.015	160.03	no cnx
2019_04_17_exp2_TH	2	pyramidal	2	235	141.385	Point 47	897.323	396.389	160.03	no cnx
2019_04_17_exp2_TH	2	pyramidal	2	235	141.385	Point 44	756.291	324.534	160.03	no cnx
2019_04_17_exp2_TH	2	pyramidal	2	235	141.385	Point 45	714.542	373.197	160.03	no cnx
2019_04_17_exp2_TH	2	pyramidal	2	235	141.385	Point 28	744.821	103.281	131.855	no cnx
2019_04_17_exp2_TH	2	pyramidal	2	235	141.385	Point 29	826.593	41.7723	131.865	no cnx
2019_04_17_exp2_TH	2	pyramidal	2	235	141.385	Point 20	744.776	-10.2356	152.595	no cnx
2019_04_17_exp2_TH	2	pyramidal	2	235	141.385	Point 21	820.471	-113.669	152.595	no cnx
2019_04_17_exp2_TH	2	pyramidal	2	235	141.385	Point 22	723.722	-50.8942	152.595	no cnx
2019_04_17_exp2_TH	2	pyramidal	2	235	141.385	Point 23	709.829	18.5949	152.595	no cnx
2019_04_17_exp2_TH	2	pyramidal	2	235	141.385	Point 24	799.336	99.8796	139.585	no cnx
2019_04_17_exp2_TH	2	pyramidal	2	235	141.385	Point 25	786.355	30.6632	139.585	no cnx
2019_04_17_exp2_TH	2	pyramidal	2	235	141.385	Point 26	772.351	-25.5703	139.585	no cnx
2019_04_17_exp2_TH	2	pyramidal	2	235	141.385	Point 27	707.587	29.8629	139.585	no cnx
2019_04_17_exp2_TH	2	pyramidal	2	235	141.385	Point 39	744.126	-23.3909	106.55	no cnx
2019_04_17_exp2_TH	2	pyramidal	2	235	141.385	Point 33	721.456	8.88081	115.78	no cnx
2019_04_17_exp2_TH	2	pyramidal	2	235	141.385	Point 38	739.147	-107.588	106.55	no cnx
2019_04_17_exp2_TH	1	pyramidal	2	229	128.915	Point 59	691.424	196.291	148.99	no cnx
2019_04_17_exp2_TH	1	pyramidal	2	229	128.915	Point 58	783.92	196.956	148.99	no cnx
2019_04_17_exp2_TH	1	pyramidal	2	229	128.915	Point 55	819.629	298.595	155.34	no cnx
2019_04_17_exp2_TH	1	pyramidal	2	229	128.915	Point 54	693.796	227.139	155.34	no cnx
2019_04_17_exp2_TH	1	pyramidal	2	229	128.915	Point 57	855.472	286.198	148.99	no cnx
2019_04_17_exp2_TH	1	pyramidal	2	229	128.915	Point 56	750	235.929	148.99	no cnx
2019_04_17_exp2_TH	1	pyramidal	2	229	128.915	Point 51	892.893	264.134	155.34	no cnx
2019_04_17_exp2_TH	1	pyramidal	2	229	128.915	Point 50	813.821	86.7099	155.34	no cnx
2019_04_17_exp2_TH	1	pyramidal	2	229	128.915	Point 53	799.271	153.884	155.34	no cnx
2019_04_17_exp2_TH	1	pyramidal	2	229	128.915	Point 52	796.18	239.724	155.34	no cnx
2019_04_17_exp2_TH	1	pyramidal	2	229	128.915	Point 11	734.831	-101.387	169.175	no cnx
2019_04_17_exp2_TH	1	pyramidal	2	229	128.915	Point 10	705.728	-11.6899	169.175	no cnx
2019_04_17_exp2_TH	1	pyramidal	2	229	128.915	Point 13	742.337	-72.6503	169.175	no cnx
2019_04_17_exp2_TH	1	pyramidal	2	229	128.915	Point 12	813.645	-10.8125	169.175	no cnx
2019_04_17_exp2_TH	1	pyramidal	2	229	128.915	Point 15	834.754	-164.494	169.175	no cnx
2019_04_17_exp2_TH	1	pyramidal	2	229	128.915	Point 14	859.148	-5.3154	169.175	no cnx
2019_04_17_exp2_TH	1	pyramidal	2	229	128.915	Point 17	710.912	-77.7946	152.595	no cnx
2019_04_17_exp2_TH	1	pyramidal	2	229	128.915	Point 16	858.416	-183.663	168.785	no cnx
2019_04_17_exp2_TH	1	pyramidal	2	229	128.915	Point 19	851.005	-160.679	152.595	no cnx
2019_04_17_exp2_TH	1	pyramidal	2	229	128.915	Point 18	826.225	-83.2111	152.595	no cnx
2019_04_17_exp2_TH	1	pyramidal	2	229	128.915	Point 31	739.771	-7.83431	131.865	no cnx
2019_04_17_exp2_TH	1	pyramidal	2	229	128.915	Point 30	810.86	15.2308	131.865	no cnx
2019_04_17_exp2_TH	1	pyramidal	2	229	128.915	Point 37	816.379	-230.127	115.78	no cnx
2019_04_17_exp2_TH	1	pyramidal	2	229	128.915	Point 36	776.891	-239.464	115.78	no cnx
2019_04_17_exp2_TH	1	pyramidal	2	229	128.915	Point 35	692.285	-213.905	115.78	no cnx
2019_04_17_exp2_TH	1	pyramidal	2	229	128.915	Point 34	833.556	-91.4464	115.78	no cnx
2019_04_17_exp2_TH	1	pyramidal	2	229	128.915	Point 5	795.223	-235.441	179.115	no cnx
2019_04_17_exp2_TH	1	pyramidal	2	229	128.915	Point 4	859.144	-190.511	184.555	no cnx
2019_04_17_exp2_TH	1	pyramidal	2	229	128.915	Point 7	823.324	-71.5162	179.115	no cnx
2019_04_17_exp2_TH	1	pyramidal	2	229	128.915	Point 6	798.811	-97.1853	179.115	no cnx
2019_04_17_exp2_TH	1	pyramidal	2	229	128.915	Point 1	733.503	-25.0405	184.555	no cnx
2019_04_17_exp2_TH	1	pyramidal	2	229	128.915	Point 3	758.241	-143.89	184.555	no cnx
2019_04_17_exp2_TH	1	pyramidal	2	229	128.915	Point 2	820.689	-124.863	184.555	no cnx
2019_04_17_exp2_TH	1	pyramidal	2	229	128.915	Point 9	814.741	5.75967	169.175	no cnx
2019_04_17_exp2_TH	1	pyramidal	2	229	128.915	Point 8	823.06	-165.835	179.115	no cnx
2019_04_17_exp2_TH	1	pyramidal	2	229	128.915	Point 32	800.816	-139.655	131.865	no cnx
2019_04_17_exp2_TH	1	pyramidal	2	229	128.915	Point 48	810.422	274.936	160.03	no cnx
2019_04_17_exp2_TH	1	pyramidal	2	229	128.915	Point 49	848.637	62.7538	160.03	no cnx
2019_04_17_exp2_TH	1	pyramidal	2	229	128.915	Point 42	806.754	-8.03105	106.55	no cnx
2019_04_17_exp2_TH	1	pyramidal	2	229	128.915	Point 43	883.089	286.179	160.03	no cnx
2019_04_17_exp2_TH	1	pyramidal	2	229	128.915	Point 40	726.299	-88.2966	106.55	no cnx
2019_04_17_exp2_TH	1	pyramidal	2	229	128.915	Point 41	760.116	-188.115	106.55	no cnx
2019_04_17_exp2_TH	1	pyramidal	2	229	128.915	Point 46	835.743	122.347	160.03	no cnx
2019_04_17_exp2_TH	1	pyramidal	2	229	128.915	Point 47	888.305	274.721	160.03	no cnx
2019_04_17_exp2_TH	1	pyramidal	2	229	128.915	Point 44	747.273	202.866	160.03	no cnx
2019_04_17_exp2_TH	1	pyramidal	2	229	128.915	Point 45	705.524	251.53	160.03	no cnx
2019_04_17_exp2_TH	1	pyramidal	2	229	128.915	Point 28	735.803	-18.3864	131.855	no cnx
2019_04_17_exp2_TH	1	pyramidal	2	229	128.915	Point 29	817.575	-79.895	131.865	no cnx
2019_04_17_exp2_TH	1	pyramidal	2	229	128.915	Point 60	771.776	89.3915	148.99	no cnx
2019_04_17_exp2_TH	1	pyramidal	2	229	128.915	Point 20	735.758	-131.903	152.595	no cnx
2019_04_17_exp2_TH	1	pyramidal	2	229	128.915	Point 21	811.452	-235.336	152.595	no cnx
2019_04_17_exp2_TH	1	pyramidal	2	229	128.915	Point 22	714.704	-172.561	152.595	no cnx
2019_04_17_exp2_TH	1	pyramidal	2	229	128.915	Point 23	700.811	-103.072	152.595	no cnx
2019_04_17_exp2_TH	1	pyramidal	2	229	128.915	Point 24	790.318	-21.7877	139.585	no cnx
2019_04_17_exp2_TH	1	pyramidal	2	229	128.915	Point 25	777.337	-91.0041	139.585	no cnx
2019_04_17_exp2_TH	1	pyramidal	2	229	128.915	Point 26	763.333	-147.238	139.585	no cnx
2019_04_17_exp2_TH	1	pyramidal	2	229	128.915	Point 27	698.569	-91.8044	139.585	no cnx
2019_04_17_exp2_TH	1	pyramidal	2	229	128.915	Point 39	735.108	-145.058	106.55	no cnx
2019_04_17_exp2_TH	1	pyramidal	2	229	128.915	Point 33	712.438	-112.786	115.78	no cnx
2019_04_17_exp2_TH	1	pyramidal	2	229	128.915	Point 38	730.129	-229.255	106.55	no cnx
2019_04_17_exp1_TH	2	pyramidal	2	195	107.705	Point 59	840.803	483.957	129.775	no cnx
2019_04_17_exp1_TH	2	pyramidal	2	195	107.705	Point 58	797.412	548.474	129.775	no cnx
2019_04_17_exp1_TH	2	pyramidal	2	195	107.705	Point 55	783.333	455.713	129.775	no cnx
2019_04_17_exp1_TH	2	pyramidal	2	195	107.705	Point 54	713.388	419.097	129.775	no cnx
2019_04_17_exp1_TH	2	pyramidal	2	195	107.705	Point 57	779.986	380.931	129.775	no cnx
2019_04_17_exp1_TH	2	pyramidal	2	195	107.705	Point 56	872.655	474.599	129.775	no cnx
2019_04_17_exp1_TH	2	pyramidal	2	195	107.705	Point 51	807.753	442.103	137.615	no cnx
2019_04_17_exp1_TH	2	pyramidal	2	195	107.705	Point 50	858.388	414.78	137.615	no cnx
2019_04_17_exp1_TH	2	pyramidal	2	195	107.705	Point 53	792.646	393.558	137.615	no cnx
2019_04_17_exp1_TH	2	pyramidal	2	195	107.705	Point 52	910.835	497.33	137.615	no cnx
2019_04_17_exp1_TH	2	pyramidal	2	195	107.705	Point 11	864.96	-90.2969	151.315	no cnx
2019_04_17_exp1_TH	2	pyramidal	2	195	107.705	Point 10	856.638	1.27311	156.225	no cnx
2019_04_17_exp1_TH	2	pyramidal	2	195	107.705	Point 13	887.447	0.300723	151.315	no cnx
2019_04_17_exp1_TH	2	pyramidal	2	195	107.705	Point 12	718.858	-76.7404	151.315	no cnx
2019_04_17_exp1_TH	2	pyramidal	2	195	107.705	Point 15	796.704	-138.993	143.265	no cnx
2019_04_17_exp1_TH	2	pyramidal	2	195	107.705	Point 14	858.831	-239.084	151.315	no cnx
2019_04_17_exp1_TH	2	pyramidal	2	195	107.705	Point 17	907.153	12.362	143.265	no cnx
2019_04_17_exp1_TH	2	pyramidal	2	195	107.705	Point 16	874.821	-114.698	143.265	no cnx
2019_04_17_exp1_TH	2	pyramidal	2	195	107.705	Point 19	753.693	-246.336	143.265	no cnx
2019_04_17_exp1_TH	2	pyramidal	2	195	107.705	Point 18	892.166	-6.28525	143.265	no cnx
2019_04_17_exp1_TH	2	pyramidal	2	195	107.705	Point 31	739.881	192.661	143.185	no cnx
2019_04_17_exp1_TH	2	pyramidal	2	195	107.705	Point 30	830.672	258.124	143.185	no cnx
2019_04_17_exp1_TH	2	pyramidal	2	195	107.705	Point 37	704.831	269.207	133.275	no cnx
2019_04_17_exp1_TH	2	pyramidal	2	195	107.705	Point 36	842.308	162.989	133.275	no cnx
2019_04_17_exp1_TH	2	pyramidal	2	195	107.705	Point 35	810.668	131.927	133.275	no cnx
2019_04_17_exp1_TH	2	pyramidal	2	195	107.705	Point 34	690.313	153.128	143.185	no cnx
2019_04_17_exp1_TH	2	pyramidal	2	195	107.705	Point 5	835.28	-228.434	158.335	no cnx
2019_04_17_exp1_TH	2	pyramidal	2	195	107.705	Point 4	790.38	11.3862	158.335	no cnx
2019_04_17_exp1_TH	2	pyramidal	2	195	107.705	Point 7	700.584	-17.2575	156.225	no cnx
2019_04_17_exp1_TH	2	pyramidal	2	195	107.705	Point 6	872.277	-226.54	158.335	no cnx
2019_04_17_exp1_TH	2	pyramidal	2	195	107.705	Point 1	895.782	-81.4427	158.335	excitatory
2019_04_17_exp1_TH	2	pyramidal	2	195	107.705	Point 3	871.459	-54.6867	158.335	no cnx
2019_04_17_exp1_TH	2	pyramidal	2	195	107.705	Point 2	720.163	-34.9482	158.335	no cnx
2019_04_17_exp1_TH	2	pyramidal	2	195	107.705	Point 9	848.5	46.1072	156.225	no cnx
2019_04_17_exp1_TH	2	pyramidal	2	195	107.705	Point 8	842.172	-0.335067	156.225	no cnx
2019_04_17_exp1_TH	2	pyramidal	2	195	107.705	Point 32	768.907	322.232	143.185	no cnx
2019_04_17_exp1_TH	2	pyramidal	2	195	107.705	Point 48	802.529	527.456	144.975	no cnx
2019_04_17_exp1_TH	2	pyramidal	2	195	107.705	Point 49	741.708	536.096	137.615	no cnx
2019_04_17_exp1_TH	2	pyramidal	2	195	107.705	Point 42	774.303	185.631	124.945	no cnx
2019_04_17_exp1_TH	2	pyramidal	2	195	107.705	Point 43	725.168	38.4874	117.305	no cnx
2019_04_17_exp1_TH	2	pyramidal	2	195	107.705	Point 40	807.776	165.244	124.945	no cnx
2019_04_17_exp1_TH	2	pyramidal	2	195	107.705	Point 41	750.163	29.8467	124.945	no cnx
2019_04_17_exp1_TH	2	pyramidal	2	195	107.705	Point 46	757.863	424.137	161.985	no cnx
2019_04_17_exp1_TH	2	pyramidal	2	195	107.705	Point 47	744.31	451.927	161.985	no cnx
2019_04_17_exp1_TH	2	pyramidal	2	195	107.705	Point 44	707.198	118.56	117.305	no cnx
2019_04_17_exp1_TH	2	pyramidal	2	195	107.705	Point 45	726.989	214.649	117.305	no cnx
2019_04_17_exp1_TH	2	pyramidal	2	195	107.705	Point 28	668.921	170.747	143.185	no cnx
2019_04_17_exp1_TH	2	pyramidal	2	195	107.705	Point 29	761.137	170.183	143.185	no cnx
2019_04_17_exp1_TH	2	pyramidal	2	195	107.705	Point 60	771.072	608.071	129.775	no cnx
2019_04_17_exp1_TH	2	pyramidal	2	195	107.705	Point 61	849.164	632.827	129.775	no cnx
2019_04_17_exp1_TH	2	pyramidal	2	195	107.705	Point 20	884.752	-175.744	143.265	no cnx
2019_04_17_exp1_TH	2	pyramidal	2	195	107.705	Point 21	778.441	91.7338	162.105	no cnx
2019_04_17_exp1_TH	2	pyramidal	2	195	107.705	Point 22	816.829	188.036	162.105	no cnx
2019_04_17_exp1_TH	2	pyramidal	2	195	107.705	Point 23	775.139	72.2781	146.545	no cnx
2019_04_17_exp1_TH	2	pyramidal	2	195	107.705	Point 24	799.278	261.015	146.545	no cnx
2019_04_17_exp1_TH	2	pyramidal	2	195	107.705	Point 25	841.315	82.0003	146.545	no cnx
2019_04_17_exp1_TH	2	pyramidal	2	195	107.705	Point 26	696.936	13.1706	146.545	no cnx
2019_04_17_exp1_TH	2	pyramidal	2	195	107.705	Point 27	727.306	189.742	143.185	no cnx
2019_04_17_exp1_TH	2	pyramidal	2	195	107.705	Point 39	765.083	125.687	124.945	no cnx
2019_04_17_exp1_TH	2	pyramidal	2	195	107.705	Point 33	859.4	169.953	143.185	no cnx
2019_04_17_exp1_TH	2	pyramidal	2	195	107.705	Point 38	739.653	40.7889	124.945	no cnx
2019_04_17_exp1_TH	0	pyramidal	2	202	104.265	Point 11	867.482	60.5203	151.315	no cnx
2019_04_17_exp1_TH	0	pyramidal	2	202	104.265	Point 10	859.16	152.09	156.225	no cnx
2019_04_17_exp1_TH	0	pyramidal	2	202	104.265	Point 13	889.969	151.118	151.315	no cnx
2019_04_17_exp1_TH	0	pyramidal	2	202	104.265	Point 12	721.38	74.0768	151.315	no cnx
2019_04_17_exp1_TH	0	pyramidal	2	202	104.265	Point 15	799.226	11.8238	143.265	no cnx
2019_04_17_exp1_TH	0	pyramidal	2	202	104.265	Point 14	861.353	-88.2672	151.315	no cnx
2019_04_17_exp1_TH	0	pyramidal	2	202	104.265	Point 17	909.675	163.179	143.265	no cnx
2019_04_17_exp1_TH	0	pyramidal	2	202	104.265	Point 16	877.343	36.1189	143.265	no cnx
2019_04_17_exp1_TH	0	pyramidal	2	202	104.265	Point 19	756.215	-95.5191	143.265	no cnx
2019_04_17_exp1_TH	0	pyramidal	2	202	104.265	Point 18	894.689	144.532	143.265	no cnx
2019_04_17_exp1_TH	0	pyramidal	2	202	104.265	Point 5	837.802	-77.617	158.335	no cnx
2019_04_17_exp1_TH	0	pyramidal	2	202	104.265	Point 4	792.902	162.203	158.335	no cnx
2019_04_17_exp1_TH	0	pyramidal	2	202	104.265	Point 7	703.106	133.56	156.225	no cnx
2019_04_17_exp1_TH	0	pyramidal	2	202	104.265	Point 6	874.799	-75.7225	158.335	no cnx
2019_04_17_exp1_TH	0	pyramidal	2	202	104.265	Point 1	898.304	69.3745	158.335	no cnx
2019_04_17_exp1_TH	0	pyramidal	2	202	104.265	Point 3	873.981	96.1305	158.335	no cnx
2019_04_17_exp1_TH	0	pyramidal	2	202	104.265	Point 2	722.685	115.869	158.335	no cnx
2019_04_17_exp1_TH	0	pyramidal	2	202	104.265	Point 9	851.022	196.924	156.225	no cnx
2019_04_17_exp1_TH	0	pyramidal	2	202	104.265	Point 8	844.694	150.482	156.225	no cnx
2019_04_17_exp1_TH	0	pyramidal	2	202	104.265	Point 20	887.274	-24.9272	143.265	no cnx
2019_04_08_exp2_TH	3	pyramidal	2	194	22.5753	Point 11	845.858	45.8579	55.195	no cnx
2019_04_08_exp2_TH	3	pyramidal	2	194	22.5753	Point 10	844.359	22.1528	55.195	no cnx
2019_04_08_exp2_TH	3	pyramidal	2	194	22.5753	Point 13	810.746	-104.683	43.555	no cnx
2019_04_08_exp2_TH	3	pyramidal	2	194	22.5753	Point 12	867.47	51.5915	55.195	no cnx
2019_04_08_exp2_TH	3	pyramidal	2	194	22.5753	Point 15	861.517	9.78793	43.555	no cnx
2019_04_08_exp2_TH	3	pyramidal	2	194	22.5753	Point 14	867.291	-56.6317	43.555	no cnx
2019_04_08_exp2_TH	3	pyramidal	2	194	22.5753	Point 17	872.982	-14.7616	36.205	no cnx
2019_04_08_exp2_TH	3	pyramidal	2	194	22.5753	Point 16	810.252	-85.1138	36.205	no cnx
2019_04_08_exp2_TH	3	pyramidal	2	194	22.5753	Point 19	854.082	90.4219	36.205	no cnx
2019_04_08_exp2_TH	3	pyramidal	2	194	22.5753	Point 18	774.666	18.3255	36.205	no cnx
2019_04_08_exp2_TH	3	pyramidal	2	194	22.5753	Point 31	834.644	324.769	55.675	no cnx
2019_04_08_exp2_TH	3	pyramidal	2	194	22.5753	Point 30	847.465	375.842	65.995	no cnx
2019_04_08_exp2_TH	3	pyramidal	2	194	22.5753	Point 37	881.168	347.081	48.275	no cnx
2019_04_08_exp2_TH	3	pyramidal	2	194	22.5753	Point 36	828.964	201.064	48.275	no cnx
2019_04_08_exp2_TH	3	pyramidal	2	194	22.5753	Point 35	865.146	174.452	48.275	no cnx
2019_04_08_exp2_TH	3	pyramidal	2	194	22.5753	Point 34	779.43	358.242	55.675	no cnx
2019_04_08_exp2_TH	3	pyramidal	2	194	22.5753	Point 5	880.834	-156.864	68.165	no cnx
2019_04_08_exp2_TH	3	pyramidal	2	194	22.5753	Point 4	851.458	-173.577	78.465	no cnx
2019_04_08_exp2_TH	3	pyramidal	2	194	22.5753	Point 7	818.678	-158.722	55.195	no cnx
2019_04_08_exp2_TH	3	pyramidal	2	194	22.5753	Point 6	889.478	60.9299	68.165	no cnx
2019_04_08_exp2_TH	3	pyramidal	2	194	22.5753	Point 1	861.777	-206.642	78.465	no cnx
2019_04_08_exp2_TH	3	pyramidal	2	194	22.5753	Point 3	880.467	-171.123	78.465	no cnx
2019_04_08_exp2_TH	3	pyramidal	2	194	22.5753	Point 2	837.322	14.7671	78.465	no cnx
2019_04_08_exp2_TH	3	pyramidal	2	194	22.5753	Point 9	819.987	-90.8386	55.195	no cnx
2019_04_08_exp2_TH	3	pyramidal	2	194	22.5753	Point 8	845.987	-112.169	55.195	no cnx
2019_04_08_exp2_TH	3	pyramidal	2	194	22.5753	Point 32	838.716	200.611	55.675	no cnx
2019_04_08_exp2_TH	3	pyramidal	2	194	22.5753	Point 42	837.69	134.214	43.045	no cnx
2019_04_08_exp2_TH	3	pyramidal	2	194	22.5753	Point 43	880.601	304.582	43.045	no cnx
2019_04_08_exp2_TH	3	pyramidal	2	194	22.5753	Point 40	751.812	370.911	48.275	no cnx
2019_04_08_exp2_TH	3	pyramidal	2	194	22.5753	Point 41	821.762	268.893	48.275	no cnx
2019_04_08_exp2_TH	3	pyramidal	2	194	22.5753	Point 46	910.689	241.483	43.045	no cnx
2019_04_08_exp2_TH	3	pyramidal	2	194	22.5753	Point 47	854.78	153.236	43.045	no cnx
2019_04_08_exp2_TH	3	pyramidal	2	194	22.5753	Point 44	925.751	308.801	43.045	no cnx
2019_04_08_exp2_TH	3	pyramidal	2	194	22.5753	Point 45	825.596	152.872	43.045	no cnx
2019_04_08_exp2_TH	3	pyramidal	2	194	22.5753	Point 28	806.172	122.878	65.995	no cnx
2019_04_08_exp2_TH	3	pyramidal	2	194	22.5753	Point 29	873.399	325.409	65.995	no cnx
2019_04_08_exp2_TH	3	pyramidal	2	194	22.5753	Point 20	775.7	-176.346	36.205	no cnx
2019_04_08_exp2_TH	3	pyramidal	2	194	22.5753	Point 21	859.588	123.979	86.635	no cnx
2019_04_08_exp2_TH	3	pyramidal	2	194	22.5753	Point 22	820.025	220.777	86.635	no cnx
2019_04_08_exp2_TH	3	pyramidal	2	194	22.5753	Point 23	890.006	258.691	76.465	no cnx
2019_04_08_exp2_TH	3	pyramidal	2	194	22.5753	Point 24	838.363	296.88	76.465	no cnx
2019_04_08_exp2_TH	3	pyramidal	2	194	22.5753	Point 25	866.745	308.124	65.995	no cnx
2019_04_08_exp2_TH	3	pyramidal	2	194	22.5753	Point 26	768.413	258.822	65.995	no cnx
2019_04_08_exp2_TH	3	pyramidal	2	194	22.5753	Point 27	898.796	295.999	65.995	no cnx
2019_04_08_exp2_TH	3	pyramidal	2	194	22.5753	Point 39	709.815	351.435	48.275	no cnx
2019_04_08_exp2_TH	3	pyramidal	2	194	22.5753	Point 33	767.237	167.087	55.675	no cnx
2019_04_08_exp2_TH	3	pyramidal	2	194	22.5753	Point 38	803.028	263.317	48.275	no cnx
2019_04_08_exp2_TH	2	pyramidal	2	195	41.3057	Point 54	874.871	391.082	33.785	no cnx
2019_04_08_exp2_TH	2	pyramidal	2	195	41.3057	Point 51	859.089	299.158	33.785	no cnx
2019_04_08_exp2_TH	2	pyramidal	2	195	41.3057	Point 50	770.934	211.619	33.785	no cnx
2019_04_08_exp2_TH	2	pyramidal	2	195	41.3057	Point 53	881.856	286.998	33.785	no cnx
2019_04_08_exp2_TH	2	pyramidal	2	195	41.3057	Point 52	843.931	451.98	33.785	no cnx
2019_04_08_exp2_TH	2	pyramidal	2	195	41.3057	Point 11	851.771	97.9761	55.195	no cnx
2019_04_08_exp2_TH	2	pyramidal	2	195	41.3057	Point 10	850.272	74.271	55.195	no cnx
2019_04_08_exp2_TH	2	pyramidal	2	195	41.3057	Point 13	816.659	-52.5646	43.555	no cnx
2019_04_08_exp2_TH	2	pyramidal	2	195	41.3057	Point 12	873.383	103.71	55.195	no cnx
2019_04_08_exp2_TH	2	pyramidal	2	195	41.3057	Point 15	867.43	61.9061	43.555	no cnx
2019_04_08_exp2_TH	2	pyramidal	2	195	41.3057	Point 14	873.204	-4.51351	43.555	no cnx
2019_04_08_exp2_TH	2	pyramidal	2	195	41.3057	Point 17	878.895	37.3566	36.205	no cnx
2019_04_08_exp2_TH	2	pyramidal	2	195	41.3057	Point 16	816.165	-32.9956	36.205	no cnx
2019_04_08_exp2_TH	2	pyramidal	2	195	41.3057	Point 19	859.995	142.54	36.205	no cnx
2019_04_08_exp2_TH	2	pyramidal	2	195	41.3057	Point 18	780.579	70.4437	36.205	no cnx
2019_04_08_exp2_TH	2	pyramidal	2	195	41.3057	Point 31	840.557	376.887	55.675	no cnx
2019_04_08_exp2_TH	2	pyramidal	2	195	41.3057	Point 30	853.378	427.96	65.995	no cnx
2019_04_08_exp2_TH	2	pyramidal	2	195	41.3057	Point 37	887.081	399.199	48.275	no cnx
2019_04_08_exp2_TH	2	pyramidal	2	195	41.3057	Point 36	834.877	253.182	48.275	no cnx
2019_04_08_exp2_TH	2	pyramidal	2	195	41.3057	Point 35	871.059	226.571	48.275	no cnx
2019_04_08_exp2_TH	2	pyramidal	2	195	41.3057	Point 34	785.343	410.36	55.675	no cnx
2019_04_08_exp2_TH	2	pyramidal	2	195	41.3057	Point 5	886.747	-104.746	68.165	no cnx
2019_04_08_exp2_TH	2	pyramidal	2	195	41.3057	Point 4	857.371	-121.459	78.465	no cnx
2019_04_08_exp2_TH	2	pyramidal	2	195	41.3057	Point 7	824.591	-106.604	55.195	no cnx
2019_04_08_exp2_TH	2	pyramidal	2	195	41.3057	Point 6	895.391	113.048	68.165	no cnx
2019_04_08_exp2_TH	2	pyramidal	2	195	41.3057	Point 1	867.69	-154.524	78.465	no cnx
2019_04_08_exp2_TH	2	pyramidal	2	195	41.3057	Point 3	886.38	-119.005	78.465	no cnx
2019_04_08_exp2_TH	2	pyramidal	2	195	41.3057	Point 2	843.235	66.8853	78.465	no cnx
2019_04_08_exp2_TH	2	pyramidal	2	195	41.3057	Point 9	825.9	-38.7204	55.195	no cnx
2019_04_08_exp2_TH	2	pyramidal	2	195	41.3057	Point 8	851.9	-60.0507	55.195	no cnx
2019_04_08_exp2_TH	2	pyramidal	2	195	41.3057	Point 32	844.629	252.729	55.675	no cnx
2019_04_08_exp2_TH	2	pyramidal	2	195	41.3057	Point 48	860.127	324.373	33.785	no cnx
2019_04_08_exp2_TH	2	pyramidal	2	195	41.3057	Point 49	893.161	244.269	33.785	no cnx
2019_04_08_exp2_TH	2	pyramidal	2	195	41.3057	Point 42	843.603	186.332	43.045	no cnx
2019_04_08_exp2_TH	2	pyramidal	2	195	41.3057	Point 43	886.514	356.7	43.045	no cnx
2019_04_08_exp2_TH	2	pyramidal	2	195	41.3057	Point 40	757.725	423.029	48.275	no cnx
2019_04_08_exp2_TH	2	pyramidal	2	195	41.3057	Point 41	827.675	321.011	48.275	no cnx
2019_04_08_exp2_TH	2	pyramidal	2	195	41.3057	Point 46	916.602	293.601	43.045	no cnx
2019_04_08_exp2_TH	2	pyramidal	2	195	41.3057	Point 47	860.693	205.354	43.045	no cnx
2019_04_08_exp2_TH	2	pyramidal	2	195	41.3057	Point 44	931.664	360.919	43.045	no cnx
2019_04_08_exp2_TH	2	pyramidal	2	195	41.3057	Point 45	831.509	204.991	43.045	no cnx
2019_04_08_exp2_TH	2	pyramidal	2	195	41.3057	Point 28	812.085	174.996	65.995	no cnx
2019_04_08_exp2_TH	2	pyramidal	2	195	41.3057	Point 29	879.312	377.527	65.995	no cnx
2019_04_08_exp2_TH	2	pyramidal	2	195	41.3057	Point 20	781.613	-124.228	36.205	no cnx
2019_04_08_exp2_TH	2	pyramidal	2	195	41.3057	Point 21	865.501	176.097	86.635	no cnx
2019_04_08_exp2_TH	2	pyramidal	2	195	41.3057	Point 22	825.938	272.895	86.635	no cnx
2019_04_08_exp2_TH	2	pyramidal	2	195	41.3057	Point 23	895.919	310.809	76.465	no cnx
2019_04_08_exp2_TH	2	pyramidal	2	195	41.3057	Point 24	844.276	348.998	76.465	no cnx
2019_04_08_exp2_TH	2	pyramidal	2	195	41.3057	Point 25	872.658	360.242	65.995	no cnx
2019_04_08_exp2_TH	2	pyramidal	2	195	41.3057	Point 26	774.326	310.94	65.995	no cnx
2019_04_08_exp2_TH	2	pyramidal	2	195	41.3057	Point 27	904.709	348.117	65.995	no cnx
2019_04_08_exp2_TH	2	pyramidal	2	195	41.3057	Point 39	715.728	403.553	48.275	no cnx
2019_04_08_exp2_TH	2	pyramidal	2	195	41.3057	Point 33	773.15	219.205	55.675	no cnx
2019_04_08_exp2_TH	2	pyramidal	2	195	41.3057	Point 38	808.941	315.435	48.275	no cnx
2019_04_08_exp2_TH	1	pyramidal	2	211	85.705	Point 54	872.155	492.046	33.785	no cnx
2019_04_08_exp2_TH	1	pyramidal	2	211	85.705	Point 51	856.373	400.122	33.785	no cnx
2019_04_08_exp2_TH	1	pyramidal	2	211	85.705	Point 50	768.218	312.583	33.785	no cnx
2019_04_08_exp2_TH	1	pyramidal	2	211	85.705	Point 53	879.14	387.962	33.785	no cnx
2019_04_08_exp2_TH	1	pyramidal	2	211	85.705	Point 52	841.215	552.944	33.785	no cnx
2019_04_08_exp2_TH	1	pyramidal	2	211	85.705	Point 11	849.055	198.94	55.195	no cnx
2019_04_08_exp2_TH	1	pyramidal	2	211	85.705	Point 10	847.556	175.235	55.195	no cnx
2019_04_08_exp2_TH	1	pyramidal	2	211	85.705	Point 13	813.943	48.3994	43.555	no cnx
2019_04_08_exp2_TH	1	pyramidal	2	211	85.705	Point 12	870.667	204.674	55.195	no cnx
2019_04_08_exp2_TH	1	pyramidal	2	211	85.705	Point 15	864.714	162.87	43.555	no cnx
2019_04_08_exp2_TH	1	pyramidal	2	211	85.705	Point 14	870.488	96.4505	43.555	no cnx
2019_04_08_exp2_TH	1	pyramidal	2	211	85.705	Point 17	876.179	138.321	36.205	no cnx
2019_04_08_exp2_TH	1	pyramidal	2	211	85.705	Point 16	813.449	67.9684	36.205	no cnx
2019_04_08_exp2_TH	1	pyramidal	2	211	85.705	Point 19	857.279	243.504	36.205	no cnx
2019_04_08_exp2_TH	1	pyramidal	2	211	85.705	Point 18	777.864	171.408	36.205	no cnx
2019_04_08_exp2_TH	1	pyramidal	2	211	85.705	Point 31	837.841	477.851	55.675	no cnx
2019_04_08_exp2_TH	1	pyramidal	2	211	85.705	Point 30	850.662	528.924	65.995	no cnx
2019_04_08_exp2_TH	1	pyramidal	2	211	85.705	Point 37	884.365	500.163	48.275	no cnx
2019_04_08_exp2_TH	1	pyramidal	2	211	85.705	Point 36	832.161	354.146	48.275	no cnx
2019_04_08_exp2_TH	1	pyramidal	2	211	85.705	Point 35	868.343	327.535	48.275	no cnx
2019_04_08_exp2_TH	1	pyramidal	2	211	85.705	Point 34	782.627	511.324	55.675	no cnx
2019_04_08_exp2_TH	1	pyramidal	2	211	85.705	Point 5	884.031	-3.78187	68.165	no cnx
2019_04_08_exp2_TH	1	pyramidal	2	211	85.705	Point 4	854.655	-20.495	78.465	no cnx
2019_04_08_exp2_TH	1	pyramidal	2	211	85.705	Point 7	821.875	-5.6402	55.195	no cnx
2019_04_08_exp2_TH	1	pyramidal	2	211	85.705	Point 6	892.675	214.012	68.165	no cnx
2019_04_08_exp2_TH	1	pyramidal	2	211	85.705	Point 1	864.974	-53.5597	78.465	no cnx
2019_04_08_exp2_TH	1	pyramidal	2	211	85.705	Point 3	883.664	-18.0408	78.465	no cnx
2019_04_08_exp2_TH	1	pyramidal	2	211	85.705	Point 2	840.519	167.849	78.465	no cnx
2019_04_08_exp2_TH	1	pyramidal	2	211	85.705	Point 9	823.184	62.2436	55.195	no cnx
2019_04_08_exp2_TH	1	pyramidal	2	211	85.705	Point 8	849.184	40.9133	55.195	no cnx
2019_04_08_exp2_TH	1	pyramidal	2	211	85.705	Point 32	841.913	353.693	55.675	no cnx
2019_04_08_exp2_TH	1	pyramidal	2	211	85.705	Point 48	857.411	425.337	33.785	no cnx
2019_04_08_exp2_TH	1	pyramidal	2	211	85.705	Point 49	890.445	345.233	33.785	no cnx
2019_04_08_exp2_TH	1	pyramidal	2	211	85.705	Point 42	840.887	287.296	43.045	no cnx
2019_04_08_exp2_TH	1	pyramidal	2	211	85.705	Point 43	883.798	457.664	43.045	no cnx
2019_04_08_exp2_TH	1	pyramidal	2	211	85.705	Point 40	755.009	523.993	48.275	no cnx
2019_04_08_exp2_TH	1	pyramidal	2	211	85.705	Point 41	824.959	421.976	48.275	no cnx
2019_04_08_exp2_TH	1	pyramidal	2	211	85.705	Point 46	913.886	394.565	43.045	no cnx
2019_04_08_exp2_TH	1	pyramidal	2	211	85.705	Point 47	857.977	306.318	43.045	no cnx
2019_04_08_exp2_TH	1	pyramidal	2	211	85.705	Point 44	928.948	461.883	43.045	no cnx
2019_04_08_exp2_TH	1	pyramidal	2	211	85.705	Point 45	828.793	305.955	43.045	no cnx
2019_04_08_exp2_TH	1	pyramidal	2	211	85.705	Point 28	809.369	275.96	65.995	no cnx
2019_04_08_exp2_TH	1	pyramidal	2	211	85.705	Point 29	876.596	478.491	65.995	no cnx
2019_04_08_exp2_TH	1	pyramidal	2	211	85.705	Point 20	778.897	-23.2636	36.205	no cnx
2019_04_08_exp2_TH	1	pyramidal	2	211	85.705	Point 21	862.785	277.061	86.635	no cnx
2019_04_08_exp2_TH	1	pyramidal	2	211	85.705	Point 22	823.222	373.859	86.635	no cnx
2019_04_08_exp2_TH	1	pyramidal	2	211	85.705	Point 23	893.203	411.773	76.465	no cnx
2019_04_08_exp2_TH	1	pyramidal	2	211	85.705	Point 24	841.56	449.962	76.465	no cnx
2019_04_08_exp2_TH	1	pyramidal	2	211	85.705	Point 25	869.942	461.206	65.995	no cnx
2019_04_08_exp2_TH	1	pyramidal	2	211	85.705	Point 26	771.61	411.904	65.995	no cnx
2019_04_08_exp2_TH	1	pyramidal	2	211	85.705	Point 27	901.993	449.081	65.995	no cnx
2019_04_08_exp2_TH	1	pyramidal	2	211	85.705	Point 39	713.012	504.517	48.275	no cnx
2019_04_08_exp2_TH	1	pyramidal	2	211	85.705	Point 33	770.434	320.169	55.675	no cnx
2019_04_08_exp2_TH	1	pyramidal	2	211	85.705	Point 38	806.225	416.399	48.275	no cnx
2019_04_08_exp2_TH	0	pyramidal	2	191	22.8751	Point 54	860.57	578.478	33.785	no cnx
2019_04_08_exp2_TH	0	pyramidal	2	191	22.8751	Point 51	844.788	486.554	33.785	no cnx
2019_04_08_exp2_TH	0	pyramidal	2	191	22.8751	Point 50	756.633	399.015	33.785	no cnx
2019_04_08_exp2_TH	0	pyramidal	2	191	22.8751	Point 53	867.555	474.394	33.785	no cnx
2019_04_08_exp2_TH	0	pyramidal	2	191	22.8751	Point 52	829.63	639.376	33.785	no cnx
2019_04_08_exp2_TH	0	pyramidal	2	191	22.8751	Point 11	837.47	285.372	55.195	no cnx
2019_04_08_exp2_TH	0	pyramidal	2	191	22.8751	Point 10	835.971	261.667	55.195	no cnx
2019_04_08_exp2_TH	0	pyramidal	2	191	22.8751	Point 13	802.358	134.831	43.555	no cnx
2019_04_08_exp2_TH	0	pyramidal	2	191	22.8751	Point 12	859.082	291.106	55.195	no cnx
2019_04_08_exp2_TH	0	pyramidal	2	191	22.8751	Point 15	853.129	249.302	43.555	no cnx
2019_04_08_exp2_TH	0	pyramidal	2	191	22.8751	Point 14	858.903	182.882	43.555	no cnx
2019_04_08_exp2_TH	0	pyramidal	2	191	22.8751	Point 17	864.594	224.753	36.205	no cnx
2019_04_08_exp2_TH	0	pyramidal	2	191	22.8751	Point 16	801.864	154.4	36.205	no cnx
2019_04_08_exp2_TH	0	pyramidal	2	191	22.8751	Point 19	845.694	329.936	36.205	no cnx
2019_04_08_exp2_TH	0	pyramidal	2	191	22.8751	Point 18	766.279	257.84	36.205	no cnx
2019_04_08_exp2_TH	0	pyramidal	2	191	22.8751	Point 31	826.256	564.283	55.675	no cnx
2019_04_08_exp2_TH	0	pyramidal	2	191	22.8751	Point 30	839.077	615.356	65.995	no cnx
2019_04_08_exp2_TH	0	pyramidal	2	191	22.8751	Point 37	872.78	586.595	48.275	no cnx
2019_04_08_exp2_TH	0	pyramidal	2	191	22.8751	Point 36	820.576	440.578	48.275	no cnx
2019_04_08_exp2_TH	0	pyramidal	2	191	22.8751	Point 35	856.758	413.966	48.275	no cnx
2019_04_08_exp2_TH	0	pyramidal	2	191	22.8751	Point 34	771.042	597.756	55.675	no cnx
2019_04_08_exp2_TH	0	pyramidal	2	191	22.8751	Point 5	872.446	82.6501	68.165	no cnx
2019_04_08_exp2_TH	0	pyramidal	2	191	22.8751	Point 4	843.07	65.937	78.465	no cnx
2019_04_08_exp2_TH	0	pyramidal	2	191	22.8751	Point 7	810.29	80.7918	55.195	no cnx
2019_04_08_exp2_TH	0	pyramidal	2	191	22.8751	Point 6	881.09	300.444	68.165	no cnx
2019_04_08_exp2_TH	0	pyramidal	2	191	22.8751	Point 1	853.389	32.8722	78.465	no cnx
2019_04_08_exp2_TH	0	pyramidal	2	191	22.8751	Point 3	872.079	68.3911	78.465	no cnx
2019_04_08_exp2_TH	0	pyramidal	2	191	22.8751	Point 2	828.934	254.281	78.465	no cnx
2019_04_08_exp2_TH	0	pyramidal	2	191	22.8751	Point 9	811.599	148.676	55.195	no cnx
2019_04_08_exp2_TH	0	pyramidal	2	191	22.8751	Point 8	837.599	127.345	55.195	no cnx
2019_04_08_exp2_TH	0	pyramidal	2	191	22.8751	Point 32	830.329	440.125	55.675	no cnx
2019_04_08_exp2_TH	0	pyramidal	2	191	22.8751	Point 48	845.826	511.769	33.785	no cnx
2019_04_08_exp2_TH	0	pyramidal	2	191	22.8751	Point 49	878.86	431.665	33.785	no cnx
2019_04_08_exp2_TH	0	pyramidal	2	191	22.8751	Point 42	829.302	373.728	43.045	no cnx
2019_04_08_exp2_TH	0	pyramidal	2	191	22.8751	Point 43	872.213	544.096	43.045	no cnx
2019_04_08_exp2_TH	0	pyramidal	2	191	22.8751	Point 40	743.424	610.425	48.275	no cnx
2019_04_08_exp2_TH	0	pyramidal	2	191	22.8751	Point 41	813.374	508.407	48.275	no cnx
2019_04_08_exp2_TH	0	pyramidal	2	191	22.8751	Point 46	902.301	480.997	43.045	no cnx
2019_04_08_exp2_TH	0	pyramidal	2	191	22.8751	Point 47	846.392	392.75	43.045	no cnx
2019_04_08_exp2_TH	0	pyramidal	2	191	22.8751	Point 44	917.364	548.315	43.045	no cnx
2019_04_08_exp2_TH	0	pyramidal	2	191	22.8751	Point 45	817.208	392.387	43.045	no cnx
2019_04_08_exp2_TH	0	pyramidal	2	191	22.8751	Point 28	797.784	362.392	65.995	no cnx
2019_04_08_exp2_TH	0	pyramidal	2	191	22.8751	Point 29	865.011	564.923	65.995	no cnx
2019_04_08_exp2_TH	0	pyramidal	2	191	22.8751	Point 20	767.312	63.1683	36.205	no cnx
2019_04_08_exp2_TH	0	pyramidal	2	191	22.8751	Point 21	851.2	363.493	86.635	no cnx
2019_04_08_exp2_TH	0	pyramidal	2	191	22.8751	Point 22	811.637	460.291	86.635	no cnx
2019_04_08_exp2_TH	0	pyramidal	2	191	22.8751	Point 23	881.618	498.205	76.465	no cnx
2019_04_08_exp2_TH	0	pyramidal	2	191	22.8751	Point 24	829.975	536.394	76.465	no cnx
2019_04_08_exp2_TH	0	pyramidal	2	191	22.8751	Point 25	858.357	547.638	65.995	no cnx
2019_04_08_exp2_TH	0	pyramidal	2	191	22.8751	Point 26	760.026	498.336	65.995	no cnx
2019_04_08_exp2_TH	0	pyramidal	2	191	22.8751	Point 27	890.408	535.513	65.995	no cnx
2019_04_08_exp2_TH	0	pyramidal	2	191	22.8751	Point 39	701.427	590.949	48.275	no cnx
2019_04_08_exp2_TH	0	pyramidal	2	191	22.8751	Point 33	758.849	406.601	55.675	no cnx
2019_04_08_exp2_TH	0	pyramidal	2	191	22.8751	Point 38	794.64	502.831	48.275	no cnx
2019_04_08_exp1_TH	1	pyramidal	2	248	105.675	Point 51	774.336	-193.318	249.665	no cnx
2019_04_08_exp1_TH	1	pyramidal	2	248	105.675	Point 50	827.718	-257.239	249.665	no cnx
2019_04_08_exp1_TH	1	pyramidal	2	248	105.675	Point 11	879.803	218.567	218.115	no cnx
2019_04_08_exp1_TH	1	pyramidal	2	248	105.675	Point 10	856.747	145.494	218.115	no cnx
2019_04_08_exp1_TH	1	pyramidal	2	248	105.675	Point 13	848.814	164.669	206.525	no cnx
2019_04_08_exp1_TH	1	pyramidal	2	248	105.675	Point 12	831.87	-10.2345	218.115	no cnx
2019_04_08_exp1_TH	1	pyramidal	2	248	105.675	Point 15	866.619	231.683	206.525	no cnx
2019_04_08_exp1_TH	1	pyramidal	2	248	105.675	Point 14	876.144	95.8011	206.525	no cnx
2019_04_08_exp1_TH	1	pyramidal	2	248	105.675	Point 17	786.434	163.35	192.615	no cnx
2019_04_08_exp1_TH	1	pyramidal	2	248	105.675	Point 16	880.911	258.687	206.525	no cnx
2019_04_08_exp1_TH	1	pyramidal	2	248	105.675	Point 19	903.816	389.54	192.615	no cnx
2019_04_08_exp1_TH	1	pyramidal	2	248	105.675	Point 18	827.593	103.83	192.615	no cnx
2019_04_08_exp1_TH	1	pyramidal	2	248	105.675	Point 31	773.279	245.535	161.715	no cnx
2019_04_08_exp1_TH	1	pyramidal	2	248	105.675	Point 30	727.818	360.866	161.715	no cnx
2019_04_08_exp1_TH	1	pyramidal	2	248	105.675	Point 37	831.461	335.511	151.385	no cnx
2019_04_08_exp1_TH	1	pyramidal	2	248	105.675	Point 36	826.844	387.256	151.385	no cnx
2019_04_08_exp1_TH	1	pyramidal	2	248	105.675	Point 35	805.606	340.342	151.385	no cnx
2019_04_08_exp1_TH	1	pyramidal	2	248	105.675	Point 34	850.878	395.721	151.385	no cnx
2019_04_08_exp1_TH	1	pyramidal	2	248	105.675	Point 5	872.26	-45.9875	230.535	no cnx
2019_04_08_exp1_TH	1	pyramidal	2	248	105.675	Point 4	775.519	-92.8011	230.535	no cnx
2019_04_08_exp1_TH	1	pyramidal	2	248	105.675	Point 7	844.156	19.0863	230.535	no cnx
2019_04_08_exp1_TH	1	pyramidal	2	248	105.675	Point 6	862.661	80.7212	230.535	no cnx
2019_04_08_exp1_TH	1	pyramidal	2	248	105.675	Point 1	878.751	-15.0948	230.535	no cnx
2019_04_08_exp1_TH	1	pyramidal	2	248	105.675	Point 3	894.294	-17.097	230.535	no cnx
2019_04_08_exp1_TH	1	pyramidal	2	248	105.675	Point 2	844.548	96.0471	230.535	no cnx
2019_04_08_exp1_TH	1	pyramidal	2	248	105.675	Point 9	857.419	56.0755	227.745	no cnx
2019_04_08_exp1_TH	1	pyramidal	2	248	105.675	Point 8	779.164	-86.7877	227.745	no cnx
2019_04_08_exp1_TH	1	pyramidal	2	248	105.675	Point 32	852.836	478.999	151.385	no cnx
2019_04_08_exp1_TH	1	pyramidal	2	248	105.675	Point 48	738.172	-93.9433	273.435	no cnx
2019_04_08_exp1_TH	1	pyramidal	2	248	105.675	Point 49	785.922	-214.272	249.665	no cnx
2019_04_08_exp1_TH	1	pyramidal	2	248	105.675	Point 42	878.74	-82.5301	291.285	no cnx
2019_04_08_exp1_TH	1	pyramidal	2	248	105.675	Point 43	853.106	-108.13	291.285	no cnx
2019_04_08_exp1_TH	1	pyramidal	2	248	105.675	Point 40	866.461	-269.886	291.285	no cnx
2019_04_08_exp1_TH	1	pyramidal	2	248	105.675	Point 41	865.339	-187.829	291.285	no cnx
2019_04_08_exp1_TH	1	pyramidal	2	248	105.675	Point 46	809.623	-168.545	280.025	no cnx
2019_04_08_exp1_TH	1	pyramidal	2	248	105.675	Point 47	819.591	-241.51	273.435	no cnx
2019_04_08_exp1_TH	1	pyramidal	2	248	105.675	Point 44	836.025	-45.7809	280.025	no cnx
2019_04_08_exp1_TH	1	pyramidal	2	248	105.675	Point 45	816.752	-149.41	280.025	no cnx
2019_04_08_exp1_TH	1	pyramidal	2	248	105.675	Point 28	893.678	404.02	161.715	no cnx
2019_04_08_exp1_TH	1	pyramidal	2	248	105.675	Point 29	823.449	443.56	161.715	no cnx
2019_04_08_exp1_TH	1	pyramidal	2	248	105.675	Point 20	801.885	288.48	179.905	no cnx
2019_04_08_exp1_TH	1	pyramidal	2	248	105.675	Point 21	860.718	413.323	179.905	no cnx
2019_04_08_exp1_TH	1	pyramidal	2	248	105.675	Point 22	866.77	372.321	179.905	no cnx
2019_04_08_exp1_TH	1	pyramidal	2	248	105.675	Point 23	888.673	367.771	179.905	no cnx
2019_04_08_exp1_TH	1	pyramidal	2	248	105.675	Point 24	778.275	222.42	172.555	no cnx
2019_04_08_exp1_TH	1	pyramidal	2	248	105.675	Point 25	820.929	437.615	172.555	no cnx
2019_04_08_exp1_TH	1	pyramidal	2	248	105.675	Point 26	790.12	266.449	172.555	no cnx
2019_04_08_exp1_TH	1	pyramidal	2	248	105.675	Point 27	897.928	379.271	172.555	no cnx
2019_04_08_exp1_TH	1	pyramidal	2	248	105.675	Point 39	883.049	-280.376	300.435	no cnx
2019_04_08_exp1_TH	1	pyramidal	2	248	105.675	Point 33	749.946	310.831	151.385	no cnx
2019_04_08_exp1_TH	1	pyramidal	2	248	105.675	Point 38	894.801	-263.902	300.435	no cnx
2019_04_08_exp1_TH	0	pyramidal	2	207	265.705	Point 51	783.398	-277.825	249.665	no cnx
2019_04_08_exp1_TH	0	pyramidal	2	207	265.705	Point 50	836.78	-341.745	249.665	no cnx
2019_04_08_exp1_TH	0	pyramidal	2	207	265.705	Point 11	888.865	134.061	218.115	no cnx
2019_04_08_exp1_TH	0	pyramidal	2	207	265.705	Point 10	865.809	60.9879	218.115	no cnx
2019_04_08_exp1_TH	0	pyramidal	2	207	265.705	Point 13	857.876	80.1625	206.525	no cnx
2019_04_08_exp1_TH	0	pyramidal	2	207	265.705	Point 12	840.932	-94.7409	218.115	no cnx
2019_04_08_exp1_TH	0	pyramidal	2	207	265.705	Point 15	875.681	147.176	206.525	no cnx
2019_04_08_exp1_TH	0	pyramidal	2	207	265.705	Point 14	885.206	11.2946	206.525	no cnx
2019_04_08_exp1_TH	0	pyramidal	2	207	265.705	Point 17	795.496	78.8431	192.615	no cnx
2019_04_08_exp1_TH	0	pyramidal	2	207	265.705	Point 16	889.973	174.181	206.525	no cnx
2019_04_08_exp1_TH	0	pyramidal	2	207	265.705	Point 19	912.878	305.033	192.615	no cnx
2019_04_08_exp1_TH	0	pyramidal	2	207	265.705	Point 18	836.655	19.3239	192.615	no cnx
2019_04_08_exp1_TH	0	pyramidal	2	207	265.705	Point 31	782.341	161.028	161.715	no cnx
2019_04_08_exp1_TH	0	pyramidal	2	207	265.705	Point 30	736.88	276.36	161.715	no cnx
2019_04_08_exp1_TH	0	pyramidal	2	207	265.705	Point 37	840.523	251.004	151.385	no cnx
2019_04_08_exp1_TH	0	pyramidal	2	207	265.705	Point 36	835.906	302.749	151.385	no cnx
2019_04_08_exp1_TH	0	pyramidal	2	207	265.705	Point 35	814.668	255.835	151.385	no cnx
2019_04_08_exp1_TH	0	pyramidal	2	207	265.705	Point 34	859.94	311.214	151.385	no cnx
2019_04_08_exp1_TH	0	pyramidal	2	207	265.705	Point 5	881.322	-130.494	230.535	no cnx
2019_04_08_exp1_TH	0	pyramidal	2	207	265.705	Point 4	784.581	-177.308	230.535	no cnx
2019_04_08_exp1_TH	0	pyramidal	2	207	265.705	Point 7	853.218	-65.4202	230.535	no cnx
2019_04_08_exp1_TH	0	pyramidal	2	207	265.705	Point 6	871.723	-3.78524	230.535	no cnx
2019_04_08_exp1_TH	0	pyramidal	2	207	265.705	Point 1	887.813	-99.6013	230.535	no cnx
2019_04_08_exp1_TH	0	pyramidal	2	207	265.705	Point 3	903.356	-101.603	230.535	no cnx
2019_04_08_exp1_TH	0	pyramidal	2	207	265.705	Point 2	853.61	11.5406	230.535	no cnx
2019_04_08_exp1_TH	0	pyramidal	2	207	265.705	Point 9	866.481	-28.431	227.745	no cnx
2019_04_08_exp1_TH	0	pyramidal	2	207	265.705	Point 8	788.226	-171.294	227.745	no cnx
2019_04_08_exp1_TH	0	pyramidal	2	207	265.705	Point 32	861.898	394.493	151.385	no cnx
2019_04_08_exp1_TH	0	pyramidal	2	207	265.705	Point 48	747.234	-178.45	273.435	no cnx
2019_04_08_exp1_TH	0	pyramidal	2	207	265.705	Point 49	794.984	-298.779	249.665	no cnx
2019_04_08_exp1_TH	0	pyramidal	2	207	265.705	Point 42	887.802	-167.037	291.285	no cnx
2019_04_08_exp1_TH	0	pyramidal	2	207	265.705	Point 43	862.168	-192.637	291.285	no cnx
2019_04_08_exp1_TH	0	pyramidal	2	207	265.705	Point 40	875.523	-354.392	291.285	no cnx
2019_04_08_exp1_TH	0	pyramidal	2	207	265.705	Point 41	874.401	-272.335	291.285	no cnx
2019_04_08_exp1_TH	0	pyramidal	2	207	265.705	Point 46	818.685	-253.051	280.025	no cnx
2019_04_08_exp1_TH	0	pyramidal	2	207	265.705	Point 47	828.653	-326.017	273.435	no cnx
2019_04_08_exp1_TH	0	pyramidal	2	207	265.705	Point 44	845.087	-130.287	280.025	no cnx
2019_04_08_exp1_TH	0	pyramidal	2	207	265.705	Point 45	825.814	-233.916	280.025	no cnx
2019_04_08_exp1_TH	0	pyramidal	2	207	265.705	Point 28	902.74	319.514	161.715	no cnx
2019_04_08_exp1_TH	0	pyramidal	2	207	265.705	Point 29	832.512	359.054	161.715	no cnx
2019_04_08_exp1_TH	0	pyramidal	2	207	265.705	Point 20	810.947	203.974	179.905	no cnx
2019_04_08_exp1_TH	0	pyramidal	2	207	265.705	Point 21	869.78	328.817	179.905	no cnx
2019_04_08_exp1_TH	0	pyramidal	2	207	265.705	Point 22	875.832	287.815	179.905	no cnx
2019_04_08_exp1_TH	0	pyramidal	2	207	265.705	Point 23	897.735	283.265	179.905	no cnx
2019_04_08_exp1_TH	0	pyramidal	2	207	265.705	Point 24	787.337	137.914	172.555	no cnx
2019_04_08_exp1_TH	0	pyramidal	2	207	265.705	Point 25	829.991	353.108	172.555	no cnx
2019_04_08_exp1_TH	0	pyramidal	2	207	265.705	Point 26	799.182	181.942	172.555	no cnx
2019_04_08_exp1_TH	0	pyramidal	2	207	265.705	Point 27	906.99	294.765	172.555	no cnx
2019_04_08_exp1_TH	0	pyramidal	2	207	265.705	Point 39	892.111	-364.882	300.435	no cnx
2019_04_08_exp1_TH	0	pyramidal	2	207	265.705	Point 33	759.008	226.324	151.385	no cnx
2019_04_08_exp1_TH	0	pyramidal	2	207	265.705	Point 38	903.863	-348.408	300.435	no cnx
2019_03_19_exp1_TH	3	pyramidal	2	246	43.4648	Point 11	918.695	262.701	82.335	no cnx
2019_03_19_exp1_TH	3	pyramidal	2	246	43.4648	Point 10	738.115	278.906	82.335	no cnx
2019_03_19_exp1_TH	3	pyramidal	2	246	43.4648	Point 13	886.576	281.555	82.335	no cnx
2019_03_19_exp1_TH	3	pyramidal	2	246	43.4648	Point 12	738.059	243.422	82.335	no cnx
2019_03_19_exp1_TH	3	pyramidal	2	246	43.4648	Point 15	948.782	161.269	81.925	no cnx
2019_03_19_exp1_TH	3	pyramidal	2	246	43.4648	Point 14	795.271	300.869	82.335	no cnx
2019_03_19_exp1_TH	3	pyramidal	2	246	43.4648	Point 17	888.758	180.404	81.925	no cnx
2019_03_19_exp1_TH	3	pyramidal	2	246	43.4648	Point 16	928.135	215.158	81.925	no cnx
2019_03_19_exp1_TH	3	pyramidal	2	246	43.4648	Point 19	884.397	273.253	81.925	no cnx
2019_03_19_exp1_TH	3	pyramidal	2	246	43.4648	Point 18	784.288	237.58	81.925	no cnx
2019_03_19_exp1_TH	3	pyramidal	2	246	43.4648	Point 31	838.348	-138.62	81.315	no cnx
2019_03_19_exp1_TH	3	pyramidal	2	246	43.4648	Point 30	730.289	254.392	69.515	no cnx
2019_03_19_exp1_TH	3	pyramidal	2	246	43.4648	Point 37	883.175	-149.056	81.315	no cnx
2019_03_19_exp1_TH	3	pyramidal	2	246	43.4648	Point 36	779.114	-46.6998	81.315	no cnx
2019_03_19_exp1_TH	3	pyramidal	2	246	43.4648	Point 35	920.699	-146.298	81.315	no cnx
2019_03_19_exp1_TH	3	pyramidal	2	246	43.4648	Point 34	910.821	21.5989	81.315	no cnx
2019_03_19_exp1_TH	3	pyramidal	2	246	43.4648	Point 5	781.577	106.44	88.355	no cnx
2019_03_19_exp1_TH	3	pyramidal	2	246	43.4648	Point 4	902.379	117.518	88.355	no cnx
2019_03_19_exp1_TH	3	pyramidal	2	246	43.4648	Point 7	889.726	162.36	82.335	no cnx
2019_03_19_exp1_TH	3	pyramidal	2	246	43.4648	Point 6	890.746	232.72	82.335	no cnx
2019_03_19_exp1_TH	3	pyramidal	2	246	43.4648	Point 1	853.172	-131.677	91.675	no cnx
2019_03_19_exp1_TH	3	pyramidal	2	246	43.4648	Point 3	856.657	-71.7982	88.355	no cnx
2019_03_19_exp1_TH	3	pyramidal	2	246	43.4648	Point 2	860.631	113.181	91.675	no cnx
2019_03_19_exp1_TH	3	pyramidal	2	246	43.4648	Point 9	903.038	238.311	82.335	no cnx
2019_03_19_exp1_TH	3	pyramidal	2	246	43.4648	Point 8	925.45	316.068	82.335	no cnx
2019_03_19_exp1_TH	3	pyramidal	2	246	43.4648	Point 32	921.76	-116.216	81.315	no cnx
2019_03_19_exp1_TH	3	pyramidal	2	246	43.4648	Point 28	832.31	128.406	69.515	no cnx
2019_03_19_exp1_TH	3	pyramidal	2	246	43.4648	Point 29	808.707	238.614	69.515	no cnx
2019_03_19_exp1_TH	3	pyramidal	2	246	43.4648	Point 20	867.639	292.771	81.925	no cnx
2019_03_19_exp1_TH	3	pyramidal	2	246	43.4648	Point 21	890.477	342.987	81.925	no cnx
2019_03_19_exp1_TH	3	pyramidal	2	246	43.4648	Point 22	863.11	351.03	81.925	no cnx
2019_03_19_exp1_TH	3	pyramidal	2	246	43.4648	Point 23	803.546	232.029	81.925	no cnx
2019_03_19_exp1_TH	3	pyramidal	2	246	43.4648	Point 24	828.764	104.616	69.515	no cnx
2019_03_19_exp1_TH	3	pyramidal	2	246	43.4648	Point 25	875.413	170.009	69.515	no cnx
2019_03_19_exp1_TH	3	pyramidal	2	246	43.4648	Point 26	839.053	98.823	69.515	no cnx
2019_03_19_exp1_TH	3	pyramidal	2	246	43.4648	Point 27	779.759	260.32	69.515	no cnx
2019_03_19_exp1_TH	3	pyramidal	2	246	43.4648	Point 39	888.656	-102.869	81.315	no cnx
2019_03_19_exp1_TH	3	pyramidal	2	246	43.4648	Point 33	826.267	-154.488	81.315	no cnx
2019_03_19_exp1_TH	3	pyramidal	2	246	43.4648	Point 38	903.589	7.8642	81.315	no cnx
2019_03_19_exp1_TH	2	pyramidal	2	184	73.1549	Point 11	914.046	297.397	82.335	no cnx
2019_03_19_exp1_TH	2	pyramidal	2	184	73.1549	Point 10	733.466	313.602	82.335	no cnx
2019_03_19_exp1_TH	2	pyramidal	2	184	73.1549	Point 13	881.927	316.251	82.335	no cnx
2019_03_19_exp1_TH	2	pyramidal	2	184	73.1549	Point 12	733.411	278.118	82.335	no cnx
2019_03_19_exp1_TH	2	pyramidal	2	184	73.1549	Point 15	944.134	195.965	81.925	no cnx
2019_03_19_exp1_TH	2	pyramidal	2	184	73.1549	Point 14	790.622	335.565	82.335	no cnx
2019_03_19_exp1_TH	2	pyramidal	2	184	73.1549	Point 17	884.109	215.1	81.925	no cnx
2019_03_19_exp1_TH	2	pyramidal	2	184	73.1549	Point 16	923.486	249.855	81.925	no cnx
2019_03_19_exp1_TH	2	pyramidal	2	184	73.1549	Point 19	879.748	307.949	81.925	no cnx
2019_03_19_exp1_TH	2	pyramidal	2	184	73.1549	Point 18	779.639	272.276	81.925	no cnx
2019_03_19_exp1_TH	2	pyramidal	2	184	73.1549	Point 31	833.699	-103.924	81.315	no cnx
2019_03_19_exp1_TH	2	pyramidal	2	184	73.1549	Point 30	725.64	289.088	69.515	no cnx
2019_03_19_exp1_TH	2	pyramidal	2	184	73.1549	Point 37	878.527	-114.36	81.315	no cnx
2019_03_19_exp1_TH	2	pyramidal	2	184	73.1549	Point 36	774.465	-12.0036	81.315	no cnx
2019_03_19_exp1_TH	2	pyramidal	2	184	73.1549	Point 35	916.051	-111.602	81.315	no cnx
2019_03_19_exp1_TH	2	pyramidal	2	184	73.1549	Point 34	906.173	56.2951	81.315	no cnx
2019_03_19_exp1_TH	2	pyramidal	2	184	73.1549	Point 5	776.928	141.136	88.355	no cnx
2019_03_19_exp1_TH	2	pyramidal	2	184	73.1549	Point 4	897.73	152.215	88.355	no cnx
2019_03_19_exp1_TH	2	pyramidal	2	184	73.1549	Point 7	885.077	197.056	82.335	no cnx
2019_03_19_exp1_TH	2	pyramidal	2	184	73.1549	Point 6	886.097	267.416	82.335	no cnx
2019_03_19_exp1_TH	2	pyramidal	2	184	73.1549	Point 1	848.523	-96.9811	91.675	no cnx
2019_03_19_exp1_TH	2	pyramidal	2	184	73.1549	Point 3	852.008	-37.102	88.355	no cnx
2019_03_19_exp1_TH	2	pyramidal	2	184	73.1549	Point 2	855.982	147.878	91.675	no cnx
2019_03_19_exp1_TH	2	pyramidal	2	184	73.1549	Point 9	898.389	273.008	82.335	no cnx
2019_03_19_exp1_TH	2	pyramidal	2	184	73.1549	Point 8	920.802	350.765	82.335	no cnx
2019_03_19_exp1_TH	2	pyramidal	2	184	73.1549	Point 32	917.112	-81.5198	81.315	no cnx
2019_03_19_exp1_TH	2	pyramidal	2	184	73.1549	Point 42	892.359	-24.9728	63.285	no cnx
2019_03_19_exp1_TH	2	pyramidal	2	184	73.1549	Point 43	848.184	-62.6331	84.675	no cnx
2019_03_19_exp1_TH	2	pyramidal	2	184	73.1549	Point 40	876.853	-36.4561	63.285	no cnx
2019_03_19_exp1_TH	2	pyramidal	2	184	73.1549	Point 41	875.625	13.7436	63.285	no cnx
2019_03_19_exp1_TH	2	pyramidal	2	184	73.1549	Point 28	827.661	163.102	69.515	no cnx
2019_03_19_exp1_TH	2	pyramidal	2	184	73.1549	Point 29	804.058	273.31	69.515	no cnx
2019_03_19_exp1_TH	2	pyramidal	2	184	73.1549	Point 20	862.99	327.467	81.925	no cnx
2019_03_19_exp1_TH	2	pyramidal	2	184	73.1549	Point 21	885.828	377.683	81.925	no cnx
2019_03_19_exp1_TH	2	pyramidal	2	184	73.1549	Point 22	858.462	385.726	81.925	no cnx
2019_03_19_exp1_TH	2	pyramidal	2	184	73.1549	Point 23	798.897	266.725	81.925	no cnx
2019_03_19_exp1_TH	2	pyramidal	2	184	73.1549	Point 24	824.116	139.312	69.515	no cnx
2019_03_19_exp1_TH	2	pyramidal	2	184	73.1549	Point 25	870.764	204.705	69.515	no cnx
2019_03_19_exp1_TH	2	pyramidal	2	184	73.1549	Point 26	834.404	133.519	69.515	no cnx
2019_03_19_exp1_TH	2	pyramidal	2	184	73.1549	Point 27	775.11	295.016	69.515	no cnx
2019_03_19_exp1_TH	2	pyramidal	2	184	73.1549	Point 39	884.007	-68.1728	81.315	no cnx
2019_03_19_exp1_TH	2	pyramidal	2	184	73.1549	Point 33	821.619	-119.792	81.315	no cnx
2019_03_19_exp1_TH	2	pyramidal	2	184	73.1549	Point 38	898.94	42.5604	81.315	no cnx
2019_03_19_exp1_TH	1	pyramidal	2	199	120.872	Point 55	901.275	-220.595	75.815	no cnx
2019_03_19_exp1_TH	1	pyramidal	2	199	120.872	Point 54	808.612	-178.649	75.815	no cnx
2019_03_19_exp1_TH	1	pyramidal	2	199	120.872	Point 56	856.205	-365.42	75.815	no cnx
2019_03_19_exp1_TH	1	pyramidal	2	199	120.872	Point 51	871.406	-283.14	103.215	no cnx
2019_03_19_exp1_TH	1	pyramidal	2	199	120.872	Point 50	833.928	-137.006	84.675	no cnx
2019_03_19_exp1_TH	1	pyramidal	2	199	120.872	Point 53	846.502	-172.485	103.215	no cnx
2019_03_19_exp1_TH	1	pyramidal	2	199	120.872	Point 52	849.006	-260.167	103.215	no cnx
2019_03_19_exp1_TH	1	pyramidal	2	199	120.872	Point 11	910.336	349.641	82.335	no cnx
2019_03_19_exp1_TH	1	pyramidal	2	199	120.872	Point 10	729.756	365.845	82.335	no cnx
2019_03_19_exp1_TH	1	pyramidal	2	199	120.872	Point 13	878.218	368.495	82.335	no cnx
2019_03_19_exp1_TH	1	pyramidal	2	199	120.872	Point 12	729.701	330.361	82.335	no cnx
2019_03_19_exp1_TH	1	pyramidal	2	199	120.872	Point 15	940.424	248.208	81.925	no cnx
2019_03_19_exp1_TH	1	pyramidal	2	199	120.872	Point 14	786.913	387.808	82.335	no cnx
2019_03_19_exp1_TH	1	pyramidal	2	199	120.872	Point 17	880.399	267.344	81.925	no cnx
2019_03_19_exp1_TH	1	pyramidal	2	199	120.872	Point 16	919.776	302.098	81.925	no cnx
2019_03_19_exp1_TH	1	pyramidal	2	199	120.872	Point 19	876.038	360.192	81.925	no cnx
2019_03_19_exp1_TH	1	pyramidal	2	199	120.872	Point 18	775.929	324.519	81.925	no cnx
2019_03_19_exp1_TH	1	pyramidal	2	199	120.872	Point 31	829.989	-51.6804	81.315	no cnx
2019_03_19_exp1_TH	1	pyramidal	2	199	120.872	Point 30	721.93	341.331	69.515	no cnx
2019_03_19_exp1_TH	1	pyramidal	2	199	120.872	Point 37	874.817	-62.1163	81.315	no cnx
2019_03_19_exp1_TH	1	pyramidal	2	199	120.872	Point 36	770.755	40.2398	81.315	no cnx
2019_03_19_exp1_TH	1	pyramidal	2	199	120.872	Point 35	912.341	-59.3582	81.315	no cnx
2019_03_19_exp1_TH	1	pyramidal	2	199	120.872	Point 34	902.463	108.538	81.315	no cnx
2019_03_19_exp1_TH	1	pyramidal	2	199	120.872	Point 5	773.218	193.38	88.355	no cnx
2019_03_19_exp1_TH	1	pyramidal	2	199	120.872	Point 4	894.02	204.458	88.355	no cnx
2019_03_19_exp1_TH	1	pyramidal	2	199	120.872	Point 7	881.367	249.299	82.335	no cnx
2019_03_19_exp1_TH	1	pyramidal	2	199	120.872	Point 6	882.387	319.659	82.335	no cnx
2019_03_19_exp1_TH	1	pyramidal	2	199	120.872	Point 1	844.813	-44.7377	91.675	no cnx
2019_03_19_exp1_TH	1	pyramidal	2	199	120.872	Point 3	848.298	15.1414	88.355	no cnx
2019_03_19_exp1_TH	1	pyramidal	2	199	120.872	Point 2	852.272	200.121	91.675	no cnx
2019_03_19_exp1_TH	1	pyramidal	2	199	120.872	Point 9	894.679	325.251	82.335	no cnx
2019_03_19_exp1_TH	1	pyramidal	2	199	120.872	Point 8	917.092	403.008	82.335	no cnx
2019_03_19_exp1_TH	1	pyramidal	2	199	120.872	Point 32	913.402	-29.2765	81.315	no cnx
2019_03_19_exp1_TH	1	pyramidal	2	199	120.872	Point 48	874.606	-135.379	84.675	no cnx
2019_03_19_exp1_TH	1	pyramidal	2	199	120.872	Point 49	813.382	-18.6682	84.675	no cnx
2019_03_19_exp1_TH	1	pyramidal	2	199	120.872	Point 42	888.649	27.2706	63.285	no cnx
2019_03_19_exp1_TH	1	pyramidal	2	199	120.872	Point 43	844.474	-10.3898	84.675	no cnx
2019_03_19_exp1_TH	1	pyramidal	2	199	120.872	Point 40	873.143	15.7873	63.285	no cnx
2019_03_19_exp1_TH	1	pyramidal	2	199	120.872	Point 41	871.915	65.9869	63.285	no cnx
2019_03_19_exp1_TH	1	pyramidal	2	199	120.872	Point 46	804.133	-25.1887	84.675	no cnx
2019_03_19_exp1_TH	1	pyramidal	2	199	120.872	Point 47	864.044	-188.431	84.675	no cnx
2019_03_19_exp1_TH	1	pyramidal	2	199	120.872	Point 44	805.732	-83.4426	84.675	no cnx
2019_03_19_exp1_TH	1	pyramidal	2	199	120.872	Point 45	910.658	-137.013	84.675	no cnx
2019_03_19_exp1_TH	1	pyramidal	2	199	120.872	Point 28	823.951	215.345	69.515	no cnx
2019_03_19_exp1_TH	1	pyramidal	2	199	120.872	Point 29	800.348	325.554	69.515	no cnx
2019_03_19_exp1_TH	1	pyramidal	2	199	120.872	Point 20	859.28	379.711	81.925	no cnx
2019_03_19_exp1_TH	1	pyramidal	2	199	120.872	Point 21	882.118	429.927	81.925	no cnx
2019_03_19_exp1_TH	1	pyramidal	2	199	120.872	Point 22	854.752	437.969	81.925	no cnx
2019_03_19_exp1_TH	1	pyramidal	2	199	120.872	Point 23	795.187	318.968	81.925	no cnx
2019_03_19_exp1_TH	1	pyramidal	2	199	120.872	Point 24	820.406	191.555	69.515	no cnx
2019_03_19_exp1_TH	1	pyramidal	2	199	120.872	Point 25	867.054	256.949	69.515	no cnx
2019_03_19_exp1_TH	1	pyramidal	2	199	120.872	Point 26	830.694	185.763	69.515	no cnx
2019_03_19_exp1_TH	1	pyramidal	2	199	120.872	Point 27	771.4	347.26	69.515	no cnx
2019_03_19_exp1_TH	1	pyramidal	2	199	120.872	Point 39	880.297	-15.9294	81.315	no cnx
2019_03_19_exp1_TH	1	pyramidal	2	199	120.872	Point 33	817.909	-67.5483	81.315	no cnx
2019_03_19_exp1_TH	1	pyramidal	2	199	120.872	Point 38	895.23	94.8038	81.315	no cnx
2019_03_15_exp2_TH	3	pyramidal	2	191	97.7651	Point 59	863.252	-63.9912	159.685	no cnx
2019_03_15_exp2_TH	3	pyramidal	2	191	97.7651	Point 58	856.364	79.5899	159.685	no cnx
2019_03_15_exp2_TH	3	pyramidal	2	191	97.7651	Point 55	783.15	29.2864	146.375	no cnx
2019_03_15_exp2_TH	3	pyramidal	2	191	97.7651	Point 54	912.548	50.9128	146.375	no cnx
2019_03_15_exp2_TH	3	pyramidal	2	191	97.7651	Point 57	817.307	79.9586	159.685	no cnx
2019_03_15_exp2_TH	3	pyramidal	2	191	97.7651	Point 56	847.929	-68.3399	146.375	no cnx
2019_03_15_exp2_TH	3	pyramidal	2	191	97.7651	Point 51	790.537	80.6733	146.375	no cnx
2019_03_15_exp2_TH	3	pyramidal	2	191	97.7651	Point 50	894.107	-9.72938	114.645	no cnx
2019_03_15_exp2_TH	3	pyramidal	2	191	97.7651	Point 53	831.438	-66.4083	146.375	no cnx
2019_03_15_exp2_TH	3	pyramidal	2	191	97.7651	Point 52	808.767	11.5555	146.375	no cnx
2019_03_15_exp2_TH	3	pyramidal	2	191	97.7651	Point 11	792.474	179.172	154.505	no cnx
2019_03_15_exp2_TH	3	pyramidal	2	191	97.7651	Point 10	831.319	207.318	154.505	no cnx
2019_03_15_exp2_TH	3	pyramidal	2	191	97.7651	Point 13	809.06	144.289	144.415	no cnx
2019_03_15_exp2_TH	3	pyramidal	2	191	97.7651	Point 12	748.423	327.07	144.415	no cnx
2019_03_15_exp2_TH	3	pyramidal	2	191	97.7651	Point 15	919.71	204.628	144.415	no cnx
2019_03_15_exp2_TH	3	pyramidal	2	191	97.7651	Point 14	831.817	89.4044	144.415	no cnx
2019_03_15_exp2_TH	3	pyramidal	2	191	97.7651	Point 17	915.047	376.098	144.415	no cnx
2019_03_15_exp2_TH	3	pyramidal	2	191	97.7651	Point 16	928.853	168.045	144.415	no cnx
2019_03_15_exp2_TH	3	pyramidal	2	191	97.7651	Point 19	944.003	323.374	144.415	no cnx
2019_03_15_exp2_TH	3	pyramidal	2	191	97.7651	Point 18	949.834	350.716	144.415	no cnx
2019_03_15_exp2_TH	3	pyramidal	2	191	97.7651	Point 31	904.232	241.712	125.655	no cnx
2019_03_15_exp2_TH	3	pyramidal	2	191	97.7651	Point 30	876.796	163.41	125.655	no cnx
2019_03_15_exp2_TH	3	pyramidal	2	191	97.7651	Point 37	862.546	122.071	117.975	no cnx
2019_03_15_exp2_TH	3	pyramidal	2	191	97.7651	Point 36	908.846	312.837	117.975	no cnx
2019_03_15_exp2_TH	3	pyramidal	2	191	97.7651	Point 35	887.458	227.807	117.975	no cnx
2019_03_15_exp2_TH	3	pyramidal	2	191	97.7651	Point 34	814.479	146.276	117.975	no cnx
2019_03_15_exp2_TH	3	pyramidal	2	191	97.7651	Point 5	872.381	307.592	161.375	no cnx
2019_03_15_exp2_TH	3	pyramidal	2	191	97.7651	Point 4	930.745	290.234	161.375	no cnx
2019_03_15_exp2_TH	3	pyramidal	2	191	97.7651	Point 7	838.233	189.237	161.375	no cnx
2019_03_15_exp2_TH	3	pyramidal	2	191	97.7651	Point 6	792.765	298.682	161.375	no cnx
2019_03_15_exp2_TH	3	pyramidal	2	191	97.7651	Point 1	860.438	146.495	161.375	no cnx
2019_03_15_exp2_TH	3	pyramidal	2	191	97.7651	Point 3	948.637	244.163	161.375	no cnx
2019_03_15_exp2_TH	3	pyramidal	2	191	97.7651	Point 2	947.886	153.879	161.375	no cnx
2019_03_15_exp2_TH	3	pyramidal	2	191	97.7651	Point 68	771.188	6.96115	166.755	no cnx
2019_03_15_exp2_TH	3	pyramidal	2	191	97.7651	Point 75	895.171	-243.58	180.945	no cnx
2019_03_15_exp2_TH	3	pyramidal	2	191	97.7651	Point 9	880.302	211.627	154.505	no cnx
2019_03_15_exp2_TH	3	pyramidal	2	191	97.7651	Point 8	864.232	336.191	154.505	no cnx
2019_03_15_exp2_TH	3	pyramidal	2	191	97.7651	Point 69	912.729	-59.5706	180.945	no cnx
2019_03_15_exp2_TH	3	pyramidal	2	191	97.7651	Point 32	902.649	159.045	125.655	no cnx
2019_03_15_exp2_TH	3	pyramidal	2	191	97.7651	Point 70	864.799	-58.2082	180.945	no cnx
2019_03_15_exp2_TH	3	pyramidal	2	191	97.7651	Point 48	889.901	11.4013	114.645	no cnx
2019_03_15_exp2_TH	3	pyramidal	2	191	97.7651	Point 49	765.398	-81.2816	114.645	no cnx
2019_03_15_exp2_TH	3	pyramidal	2	191	97.7651	Point 42	854.095	472.094	114.045	no cnx
2019_03_15_exp2_TH	3	pyramidal	2	191	97.7651	Point 43	877.488	303.857	114.045	no cnx
2019_03_15_exp2_TH	3	pyramidal	2	191	97.7651	Point 40	887.968	465.66	114.045	no cnx
2019_03_15_exp2_TH	3	pyramidal	2	191	97.7651	Point 41	868.827	339.156	114.045	no cnx
2019_03_15_exp2_TH	3	pyramidal	2	191	97.7651	Point 46	839.249	415.846	114.045	no cnx
2019_03_15_exp2_TH	3	pyramidal	2	191	97.7651	Point 47	776.743	-3.6577	114.645	no cnx
2019_03_15_exp2_TH	3	pyramidal	2	191	97.7651	Point 44	869.26	386.752	114.045	no cnx
2019_03_15_exp2_TH	3	pyramidal	2	191	97.7651	Point 45	871.66	325.8	114.045	no cnx
2019_03_15_exp2_TH	3	pyramidal	2	191	97.7651	Point 28	842.498	226.873	125.655	no cnx
2019_03_15_exp2_TH	3	pyramidal	2	191	97.7651	Point 29	887.156	241.84	125.655	no cnx
2019_03_15_exp2_TH	3	pyramidal	2	191	97.7651	Point 66	905.455	-210.491	166.755	no cnx
2019_03_15_exp2_TH	3	pyramidal	2	191	97.7651	Point 67	872.197	-191.196	166.755	no cnx
2019_03_15_exp2_TH	3	pyramidal	2	191	97.7651	Point 60	880.968	-97.3496	159.685	no cnx
2019_03_15_exp2_TH	3	pyramidal	2	191	97.7651	Point 61	829.646	-139.882	159.685	no cnx
2019_03_15_exp2_TH	3	pyramidal	2	191	97.7651	Point 62	895.886	-136.934	159.685	no cnx
2019_03_15_exp2_TH	3	pyramidal	2	191	97.7651	Point 63	865.258	-82.4907	166.755	no cnx
2019_03_15_exp2_TH	3	pyramidal	2	191	97.7651	Point 20	825.863	356.292	133.525	no cnx
2019_03_15_exp2_TH	3	pyramidal	2	191	97.7651	Point 21	897.175	391.557	133.525	no cnx
2019_03_15_exp2_TH	3	pyramidal	2	191	97.7651	Point 22	833.491	243.706	133.525	no cnx
2019_03_15_exp2_TH	3	pyramidal	2	191	97.7651	Point 23	884.472	197.309	133.525	no cnx
2019_03_15_exp2_TH	3	pyramidal	2	191	97.7651	Point 24	957.723	219.239	133.525	no cnx
2019_03_15_exp2_TH	3	pyramidal	2	191	97.7651	Point 25	822.815	205.634	133.525	no cnx
2019_03_15_exp2_TH	3	pyramidal	2	191	97.7651	Point 26	801.076	89.1332	133.525	no cnx
2019_03_15_exp2_TH	3	pyramidal	2	191	97.7651	Point 27	918.206	197.774	133.525	no cnx
2019_03_15_exp2_TH	3	pyramidal	2	191	97.7651	Point 64	910.53	-125.095	166.755	no cnx
2019_03_15_exp2_TH	3	pyramidal	2	191	97.7651	Point 65	803.582	-167.26	166.755	no cnx
2019_03_15_exp2_TH	3	pyramidal	2	191	97.7651	Point 39	822.512	417.893	114.045	no cnx
2019_03_15_exp2_TH	3	pyramidal	2	191	97.7651	Point 71	809.182	-106.077	180.945	no cnx
2019_03_15_exp2_TH	3	pyramidal	2	191	97.7651	Point 33	923.458	151.703	125.655	no cnx
2019_03_15_exp2_TH	3	pyramidal	2	191	97.7651	Point 38	838.987	143.406	117.975	no cnx
2019_03_15_exp2_TH	3	pyramidal	2	191	97.7651	Point 73	931.598	-96.8289	180.945	no cnx
2019_03_15_exp2_TH	3	pyramidal	2	191	97.7651	Point 74	929.946	-133.561	180.945	no cnx
2019_03_15_exp2_TH	3	pyramidal	2	191	97.7651	Point 72	892.031	-163.506	180.945	no cnx
2019_03_15_exp2_TH	0	pyramidal	2	199	99.1547	Point 59	877.051	-243.497	159.685	no cnx
2019_03_15_exp2_TH	0	pyramidal	2	199	99.1547	Point 58	870.164	-99.9155	159.685	no cnx
2019_03_15_exp2_TH	0	pyramidal	2	199	99.1547	Point 55	796.949	-150.219	146.375	no cnx
2019_03_15_exp2_TH	0	pyramidal	2	199	99.1547	Point 54	926.347	-128.593	146.375	no cnx
2019_03_15_exp2_TH	0	pyramidal	2	199	99.1547	Point 57	831.106	-99.5468	159.685	no cnx
2019_03_15_exp2_TH	0	pyramidal	2	199	99.1547	Point 56	861.729	-247.845	146.375	no cnx
2019_03_15_exp2_TH	0	pyramidal	2	199	99.1547	Point 51	804.337	-98.8321	146.375	no cnx
2019_03_15_exp2_TH	0	pyramidal	2	199	99.1547	Point 50	907.907	-189.235	114.645	no cnx
2019_03_15_exp2_TH	0	pyramidal	2	199	99.1547	Point 53	845.237	-245.914	146.375	no cnx
2019_03_15_exp2_TH	0	pyramidal	2	199	99.1547	Point 52	822.567	-167.95	146.375	no cnx
2019_03_15_exp2_TH	0	pyramidal	2	199	99.1547	Point 11	806.273	-0.333029	154.505	no cnx
2019_03_15_exp2_TH	0	pyramidal	2	199	99.1547	Point 10	845.119	27.8126	154.505	no cnx
2019_03_15_exp2_TH	0	pyramidal	2	199	99.1547	Point 13	822.86	-35.2166	144.415	no cnx
2019_03_15_exp2_TH	0	pyramidal	2	199	99.1547	Point 12	762.222	147.565	144.415	no cnx
2019_03_15_exp2_TH	0	pyramidal	2	199	99.1547	Point 15	933.509	25.1228	144.415	no cnx
2019_03_15_exp2_TH	0	pyramidal	2	199	99.1547	Point 14	845.617	-90.101	144.415	no cnx
2019_03_15_exp2_TH	0	pyramidal	2	199	99.1547	Point 17	928.847	196.593	144.415	no cnx
2019_03_15_exp2_TH	0	pyramidal	2	199	99.1547	Point 16	942.652	-11.4601	144.415	no cnx
2019_03_15_exp2_TH	0	pyramidal	2	199	99.1547	Point 19	957.803	143.869	144.415	no cnx
2019_03_15_exp2_TH	0	pyramidal	2	199	99.1547	Point 18	963.633	171.211	144.415	no cnx
2019_03_15_exp2_TH	0	pyramidal	2	199	99.1547	Point 31	918.032	62.2069	125.655	no cnx
2019_03_15_exp2_TH	0	pyramidal	2	199	99.1547	Point 30	890.596	-16.0951	125.655	no cnx
2019_03_15_exp2_TH	0	pyramidal	2	199	99.1547	Point 37	876.346	-57.4341	117.975	no cnx
2019_03_15_exp2_TH	0	pyramidal	2	199	99.1547	Point 36	922.646	133.331	117.975	no cnx
2019_03_15_exp2_TH	0	pyramidal	2	199	99.1547	Point 35	901.258	48.3015	117.975	no cnx
2019_03_15_exp2_TH	0	pyramidal	2	199	99.1547	Point 34	828.279	-33.2292	117.975	no cnx
2019_03_15_exp2_TH	0	pyramidal	2	199	99.1547	Point 5	886.181	128.087	161.375	no cnx
2019_03_15_exp2_TH	0	pyramidal	2	199	99.1547	Point 4	944.545	110.729	161.375	no cnx
2019_03_15_exp2_TH	0	pyramidal	2	199	99.1547	Point 7	852.033	9.73138	161.375	no cnx
2019_03_15_exp2_TH	0	pyramidal	2	199	99.1547	Point 6	806.564	119.176	161.375	no cnx
2019_03_15_exp2_TH	0	pyramidal	2	199	99.1547	Point 1	874.238	-33.0103	161.375	no cnx
2019_03_15_exp2_TH	0	pyramidal	2	199	99.1547	Point 3	962.437	64.6581	161.375	no cnx
2019_03_15_exp2_TH	0	pyramidal	2	199	99.1547	Point 2	961.686	-25.6267	161.375	no cnx
2019_03_15_exp2_TH	0	pyramidal	2	199	99.1547	Point 68	784.988	-172.544	166.755	no cnx
2019_03_15_exp2_TH	0	pyramidal	2	199	99.1547	Point 75	908.971	-423.085	180.945	no cnx
2019_03_15_exp2_TH	0	pyramidal	2	199	99.1547	Point 9	894.102	32.1219	154.505	no cnx
2019_03_15_exp2_TH	0	pyramidal	2	199	99.1547	Point 8	878.032	156.686	154.505	no cnx
2019_03_15_exp2_TH	0	pyramidal	2	199	99.1547	Point 69	926.529	-239.076	180.945	no cnx
2019_03_15_exp2_TH	0	pyramidal	2	199	99.1547	Point 32	916.449	-20.4606	125.655	no cnx
2019_03_15_exp2_TH	0	pyramidal	2	199	99.1547	Point 70	878.599	-237.714	180.945	no cnx
2019_03_15_exp2_TH	0	pyramidal	2	199	99.1547	Point 48	903.701	-168.104	114.645	no cnx
2019_03_15_exp2_TH	0	pyramidal	2	199	99.1547	Point 49	779.198	-260.787	114.645	no cnx
2019_03_15_exp2_TH	0	pyramidal	2	199	99.1547	Point 42	867.894	292.589	114.045	no cnx
2019_03_15_exp2_TH	0	pyramidal	2	199	99.1547	Point 43	891.288	124.351	114.045	no cnx
2019_03_15_exp2_TH	0	pyramidal	2	199	99.1547	Point 40	901.768	286.154	114.045	no cnx
2019_03_15_exp2_TH	0	pyramidal	2	199	99.1547	Point 41	882.627	159.651	114.045	no cnx
2019_03_15_exp2_TH	0	pyramidal	2	199	99.1547	Point 46	853.049	236.34	114.045	no cnx
2019_03_15_exp2_TH	0	pyramidal	2	199	99.1547	Point 47	790.542	-183.163	114.645	no cnx
2019_03_15_exp2_TH	0	pyramidal	2	199	99.1547	Point 44	883.059	207.246	114.045	no cnx
2019_03_15_exp2_TH	0	pyramidal	2	199	99.1547	Point 45	885.46	146.294	114.045	no cnx
2019_03_15_exp2_TH	0	pyramidal	2	199	99.1547	Point 28	856.298	47.368	125.655	no cnx
2019_03_15_exp2_TH	0	pyramidal	2	199	99.1547	Point 29	900.956	62.3343	125.655	no cnx
2019_03_15_exp2_TH	0	pyramidal	2	199	99.1547	Point 66	919.254	-389.996	166.755	no cnx
2019_03_15_exp2_TH	0	pyramidal	2	199	99.1547	Point 67	885.997	-370.701	166.755	no cnx
2019_03_15_exp2_TH	0	pyramidal	2	199	99.1547	Point 60	894.768	-276.855	159.685	no cnx
2019_03_15_exp2_TH	0	pyramidal	2	199	99.1547	Point 61	843.446	-319.387	159.685	no cnx
2019_03_15_exp2_TH	0	pyramidal	2	199	99.1547	Point 62	909.685	-316.439	159.685	no cnx
2019_03_15_exp2_TH	0	pyramidal	2	199	99.1547	Point 63	879.058	-261.996	166.755	no cnx
2019_03_15_exp2_TH	0	pyramidal	2	199	99.1547	Point 20	839.663	176.787	133.525	no cnx
2019_03_15_exp2_TH	0	pyramidal	2	199	99.1547	Point 21	910.974	212.051	133.525	no cnx
2019_03_15_exp2_TH	0	pyramidal	2	199	99.1547	Point 22	847.291	64.2001	133.525	no cnx
2019_03_15_exp2_TH	0	pyramidal	2	199	99.1547	Point 23	898.272	17.8032	133.525	no cnx
2019_03_15_exp2_TH	0	pyramidal	2	199	99.1547	Point 24	971.522	39.7338	133.525	no cnx
2019_03_15_exp2_TH	0	pyramidal	2	199	99.1547	Point 25	836.615	26.1289	133.525	no cnx
2019_03_15_exp2_TH	0	pyramidal	2	199	99.1547	Point 26	814.876	-90.3721	133.525	no cnx
2019_03_15_exp2_TH	0	pyramidal	2	199	99.1547	Point 27	932.006	18.2691	133.525	no cnx
2019_03_15_exp2_TH	0	pyramidal	2	199	99.1547	Point 64	924.33	-304.601	166.755	no cnx
2019_03_15_exp2_TH	0	pyramidal	2	199	99.1547	Point 65	817.382	-346.765	166.755	no cnx
2019_03_15_exp2_TH	0	pyramidal	2	199	99.1547	Point 39	836.311	238.387	114.045	no cnx
2019_03_15_exp2_TH	0	pyramidal	2	199	99.1547	Point 71	822.982	-285.583	180.945	no cnx
2019_03_15_exp2_TH	0	pyramidal	2	199	99.1547	Point 33	937.257	-27.802	125.655	no cnx
2019_03_15_exp2_TH	0	pyramidal	2	199	99.1547	Point 38	852.786	-36.0996	117.975	no cnx
2019_03_15_exp2_TH	0	pyramidal	2	199	99.1547	Point 73	945.398	-276.334	180.945	no cnx
2019_03_15_exp2_TH	0	pyramidal	2	199	99.1547	Point 74	943.746	-313.066	180.945	no cnx
2019_03_15_exp2_TH	0	pyramidal	2	199	99.1547	Point 72	905.831	-343.011	180.945	no cnx
2019_03_15_exp1_TH	3	pyramidal	2	300	148.265	Point 11	856.326	-65.0343	202.685	no cnx
2019_03_15_exp1_TH	3	pyramidal	2	300	148.265	Point 10	876.964	-14.1755	202.685	no cnx
2019_03_15_exp1_TH	3	pyramidal	2	300	148.265	Point 13	816.275	-165.326	202.695	no cnx
2019_03_15_exp1_TH	3	pyramidal	2	300	148.265	Point 12	829.888	-93.1022	202.685	no cnx
2019_03_15_exp1_TH	3	pyramidal	2	300	148.265	Point 15	841.933	-110.773	196.565	no cnx
2019_03_15_exp1_TH	3	pyramidal	2	300	148.265	Point 14	769.633	-89.2373	196.565	no cnx
2019_03_15_exp1_TH	3	pyramidal	2	300	148.265	Point 17	959.039	-114.729	196.565	no cnx
2019_03_15_exp1_TH	3	pyramidal	2	300	148.265	Point 16	918.248	-47.1076	196.565	no cnx
2019_03_15_exp1_TH	3	pyramidal	2	300	148.265	Point 19	907.987	28.0563	196.565	no cnx
2019_03_15_exp1_TH	3	pyramidal	2	300	148.265	Point 18	803.797	-68.132	196.565	no cnx
2019_03_15_exp1_TH	3	pyramidal	2	300	148.265	Point 31	913.195	-199.737	192.955	no cnx
2019_03_15_exp1_TH	3	pyramidal	2	300	148.265	Point 30	930.854	-49.1798	193.925	no cnx
2019_03_15_exp1_TH	3	pyramidal	2	300	148.265	Point 37	863.649	-327.38	192.955	no cnx
2019_03_15_exp1_TH	3	pyramidal	2	300	148.265	Point 36	947.518	-345.258	192.955	no cnx
2019_03_15_exp1_TH	3	pyramidal	2	300	148.265	Point 35	884.724	-362.633	192.955	no cnx
2019_03_15_exp1_TH	3	pyramidal	2	300	148.265	Point 34	893.168	-119.328	192.955	no cnx
2019_03_15_exp1_TH	3	pyramidal	2	300	148.265	Point 5	850.262	-26.7593	204.065	no cnx
2019_03_15_exp1_TH	3	pyramidal	2	300	148.265	Point 4	836.109	-210.383	204.065	no cnx
2019_03_15_exp1_TH	3	pyramidal	2	300	148.265	Point 7	929.417	-107.986	204.065	no cnx
2019_03_15_exp1_TH	3	pyramidal	2	300	148.265	Point 6	812.127	-44.8597	204.065	no cnx
2019_03_15_exp1_TH	3	pyramidal	2	300	148.265	Point 1	899.952	-176.465	204.065	no cnx
2019_03_15_exp1_TH	3	pyramidal	2	300	148.265	Point 3	919.202	-84.1688	204.065	no cnx
2019_03_15_exp1_TH	3	pyramidal	2	300	148.265	Point 2	810.125	-215.156	204.065	no cnx
2019_03_15_exp1_TH	3	pyramidal	2	300	148.265	Point 9	886.436	-60.4703	202.685	no cnx
2019_03_15_exp1_TH	3	pyramidal	2	300	148.265	Point 8	806.199	22.3733	204.065	no cnx
2019_03_15_exp1_TH	3	pyramidal	2	300	148.265	Point 32	828.774	-245.61	192.955	no cnx
2019_03_15_exp1_TH	3	pyramidal	2	300	148.265	Point 28	901.588	-255.434	193.925	no cnx
2019_03_15_exp1_TH	3	pyramidal	2	300	148.265	Point 29	945.279	-184.925	193.925	no cnx
2019_03_15_exp1_TH	3	pyramidal	2	300	148.265	Point 20	816.195	-70.6903	196.565	no cnx
2019_03_15_exp1_TH	3	pyramidal	2	300	148.265	Point 21	813.196	-12.2456	196.565	no cnx
2019_03_15_exp1_TH	3	pyramidal	2	300	148.265	Point 22	846.031	-87.4535	196.565	no cnx
2019_03_15_exp1_TH	3	pyramidal	2	300	148.265	Point 23	900.581	70.3535	196.565	no cnx
2019_03_15_exp1_TH	3	pyramidal	2	300	148.265	Point 24	943.11	-122.257	193.925	no cnx
2019_03_15_exp1_TH	3	pyramidal	2	300	148.265	Point 25	849.638	-106.143	193.925	no cnx
2019_03_15_exp1_TH	3	pyramidal	2	300	148.265	Point 26	848.556	-160.649	193.925	no cnx
2019_03_15_exp1_TH	3	pyramidal	2	300	148.265	Point 27	860.154	-182.46	193.925	no cnx
2019_03_15_exp1_TH	3	pyramidal	2	300	148.265	Point 33	926.063	-327.01	192.955	no cnx
2019_03_15_exp1_TH	2	pyramidal	2	204	160.335	Point 11	855.73	-66.9413	202.685	no cnx
2019_03_15_exp1_TH	2	pyramidal	2	204	160.335	Point 10	876.369	-16.0825	202.685	no cnx
2019_03_15_exp1_TH	2	pyramidal	2	204	160.335	Point 13	815.679	-167.233	202.695	no cnx
2019_03_15_exp1_TH	2	pyramidal	2	204	160.335	Point 12	829.293	-95.0091	202.685	no cnx
2019_03_15_exp1_TH	2	pyramidal	2	204	160.335	Point 15	841.338	-112.68	196.565	no cnx
2019_03_15_exp1_TH	2	pyramidal	2	204	160.335	Point 14	769.037	-91.1443	196.565	no cnx
2019_03_15_exp1_TH	2	pyramidal	2	204	160.335	Point 17	958.444	-116.636	196.565	no cnx
2019_03_15_exp1_TH	2	pyramidal	2	204	160.335	Point 16	917.652	-49.0145	196.565	no cnx
2019_03_15_exp1_TH	2	pyramidal	2	204	160.335	Point 19	907.391	26.1494	196.565	no cnx
2019_03_15_exp1_TH	2	pyramidal	2	204	160.335	Point 18	803.201	-70.039	196.565	no cnx
2019_03_15_exp1_TH	2	pyramidal	2	204	160.335	Point 31	912.599	-201.644	192.955	no cnx
2019_03_15_exp1_TH	2	pyramidal	2	204	160.335	Point 30	930.258	-51.0867	193.925	no cnx
2019_03_15_exp1_TH	2	pyramidal	2	204	160.335	Point 37	863.054	-329.287	192.955	no cnx
2019_03_15_exp1_TH	2	pyramidal	2	204	160.335	Point 36	946.922	-347.165	192.955	no cnx
2019_03_15_exp1_TH	2	pyramidal	2	204	160.335	Point 35	884.128	-364.54	192.955	no cnx
2019_03_15_exp1_TH	2	pyramidal	2	204	160.335	Point 34	892.573	-121.235	192.955	no cnx
2019_03_15_exp1_TH	2	pyramidal	2	204	160.335	Point 5	849.666	-28.6663	204.065	no cnx
2019_03_15_exp1_TH	2	pyramidal	2	204	160.335	Point 4	835.514	-212.29	204.065	no cnx
2019_03_15_exp1_TH	2	pyramidal	2	204	160.335	Point 7	928.822	-109.893	204.065	no cnx
2019_03_15_exp1_TH	2	pyramidal	2	204	160.335	Point 6	811.531	-46.7666	204.065	no cnx
2019_03_15_exp1_TH	2	pyramidal	2	204	160.335	Point 1	899.357	-178.372	204.065	no cnx
2019_03_15_exp1_TH	2	pyramidal	2	204	160.335	Point 3	918.607	-86.0757	204.065	no cnx
2019_03_15_exp1_TH	2	pyramidal	2	204	160.335	Point 2	809.529	-217.063	204.065	no cnx
2019_03_15_exp1_TH	2	pyramidal	2	204	160.335	Point 9	885.84	-62.3773	202.685	no cnx
2019_03_15_exp1_TH	2	pyramidal	2	204	160.335	Point 8	805.604	20.4664	204.065	no cnx
2019_03_15_exp1_TH	2	pyramidal	2	204	160.335	Point 32	828.178	-247.517	192.955	no cnx
2019_03_15_exp1_TH	2	pyramidal	2	204	160.335	Point 28	900.993	-257.341	193.925	no cnx
2019_03_15_exp1_TH	2	pyramidal	2	204	160.335	Point 29	944.683	-186.832	193.925	no cnx
2019_03_15_exp1_TH	2	pyramidal	2	204	160.335	Point 20	815.599	-72.5972	196.565	no cnx
2019_03_15_exp1_TH	2	pyramidal	2	204	160.335	Point 21	812.6	-14.1525	196.565	no cnx
2019_03_15_exp1_TH	2	pyramidal	2	204	160.335	Point 22	845.436	-89.3605	196.565	no cnx
2019_03_15_exp1_TH	2	pyramidal	2	204	160.335	Point 23	899.985	68.4465	196.565	no cnx
2019_03_15_exp1_TH	2	pyramidal	2	204	160.335	Point 24	942.515	-124.164	193.925	no cnx
2019_03_15_exp1_TH	2	pyramidal	2	204	160.335	Point 25	849.043	-108.05	193.925	no cnx
2019_03_15_exp1_TH	2	pyramidal	2	204	160.335	Point 26	847.96	-162.556	193.925	no cnx
2019_03_15_exp1_TH	2	pyramidal	2	204	160.335	Point 27	859.558	-184.367	193.925	no cnx
2019_03_15_exp1_TH	2	pyramidal	2	204	160.335	Point 33	925.468	-328.917	192.955	no cnx
2018_04_27_exp2_CAB	3	pyramidal	2		-56.19	TSeries_236_9			-14.33	no cnx
2018_04_27_exp2_CAB	3	pyramidal	2		-56.19	TSeries_236_8			-14.33	no cnx
2018_04_27_exp2_CAB	3	pyramidal	2		-56.19	TSeries_236_3			-14.33	no cnx
2018_04_27_exp2_CAB	3	pyramidal	2		-56.19	TSeries_236_2			-14.33	no cnx
2018_04_27_exp2_CAB	3	pyramidal	2		-56.19	TSeries_236_1			-14.33	no cnx
2018_04_27_exp2_CAB	3	pyramidal	2		-56.19	TSeries_236_10			-14.33	no cnx
2018_04_27_exp2_CAB	3	pyramidal	2		-56.19	TSeries_236_7			-14.33	no cnx
2018_04_27_exp2_CAB	3	pyramidal	2		-56.19	TSeries_236_6			-14.33	no cnx
2018_04_27_exp2_CAB	3	pyramidal	2		-56.19	TSeries_236_5			-14.33	no cnx
2018_04_27_exp2_CAB	3	pyramidal	2		-56.19	TSeries_236_4			-14.33	no cnx
2018_04_27_exp2_CAB	3	pyramidal	2		-56.19	TSeries_616_1			-51.37	no cnx
2018_04_27_exp2_CAB	3	pyramidal	2		-56.19	TSeries_616_2			-51.37	no cnx
2018_04_27_exp2_CAB	3	pyramidal	2		-56.19	TSeries_456_2			0.56	no cnx
2018_04_27_exp2_CAB	3	pyramidal	2		-56.19	TSeries_456_1			0.56	no cnx
2018_04_27_exp2_CAB	3	pyramidal	2		-56.19	TSeries_686_4			-16.61	no cnx
2018_04_27_exp2_CAB	3	pyramidal	2		-56.19	TSeries_686_5			-16.61	no cnx
2018_04_27_exp2_CAB	3	pyramidal	2		-56.19	TSeries_686_2			-16.61	no cnx
2018_04_27_exp2_CAB	3	pyramidal	2		-56.19	TSeries_686_3			-16.61	no cnx
2018_04_27_exp2_CAB	3	pyramidal	2		-56.19	TSeries_686_1			-16.61	no cnx
2018_04_27_exp2_CAB	3	pyramidal	2		-56.19	TSeries_476_1			-65.91	no cnx
2018_04_27_exp2_CAB	3	pyramidal	2		-56.19	TSeries_476_3			-65.91	no cnx
2018_04_27_exp2_CAB	3	pyramidal	2		-56.19	TSeries_476_2			-65.91	no cnx
2018_04_27_exp2_CAB	3	pyramidal	2		-56.19	TSeries_476_5			-65.91	no cnx
2018_04_27_exp2_CAB	3	pyramidal	2		-56.19	TSeries_476_4			-65.91	no cnx
2018_04_27_exp2_CAB	3	pyramidal	2		-56.19	TSeries_476_7			-65.91	no cnx
2018_04_27_exp2_CAB	3	pyramidal	2		-56.19	TSeries_476_6			-65.91	no cnx
2018_04_27_exp2_CAB	3	pyramidal	2		-56.19	TSeries_476_9			-65.91	no cnx
2018_04_27_exp2_CAB	3	pyramidal	2		-56.19	TSeries_476_8			-65.91	no cnx
2018_04_27_exp2_CAB	3	pyramidal	2		-56.19	TSeries_476_10			-65.91	no cnx
2018_04_27_exp2_CAB	3	pyramidal	2		-56.19	TSeries_736_4			-15.42	no cnx
2018_04_27_exp2_CAB	3	pyramidal	2		-56.19	TSeries_736_3			-15.42	no cnx
2018_04_27_exp2_CAB	3	pyramidal	2		-56.19	TSeries_336_10			-6.45	no cnx
2018_04_27_exp2_CAB	3	pyramidal	2		-56.19	TSeries_336_8			-6.45	no cnx
2018_04_27_exp2_CAB	3	pyramidal	2		-56.19	TSeries_336_9			-6.45	no cnx
2018_04_27_exp2_CAB	3	pyramidal	2		-56.19	TSeries_336_2			-6.45	no cnx
2018_04_27_exp2_CAB	3	pyramidal	2		-56.19	TSeries_336_3			-6.45	no cnx
2018_04_27_exp2_CAB	3	pyramidal	2		-56.19	TSeries_336_1			-6.45	no cnx
2018_04_27_exp2_CAB	3	pyramidal	2		-56.19	TSeries_336_6			-6.45	no cnx
2018_04_27_exp2_CAB	3	pyramidal	2		-56.19	TSeries_336_7			-6.45	no cnx
2018_04_27_exp2_CAB	3	pyramidal	2		-56.19	TSeries_336_4			-6.45	no cnx
2018_04_27_exp2_CAB	3	pyramidal	2		-56.19	TSeries_336_5			-6.45	no cnx
2018_04_27_exp2_CAB	3	pyramidal	2		-56.19	TSeries_136_10			-26.2	no cnx
2018_04_27_exp2_CAB	3	pyramidal	2		-56.19	TSeries_136_8			-26.2	no cnx
2018_04_27_exp2_CAB	3	pyramidal	2		-56.19	TSeries_136_9			-26.2	no cnx
2018_04_27_exp2_CAB	3	pyramidal	2		-56.19	TSeries_136_1			-26.2	no cnx
2018_04_27_exp2_CAB	3	pyramidal	2		-56.19	TSeries_136_2			-26.2	no cnx
2018_04_27_exp2_CAB	3	pyramidal	2		-56.19	TSeries_136_3			-26.2	no cnx
2018_04_27_exp2_CAB	3	pyramidal	2		-56.19	TSeries_136_4			-26.2	no cnx
2018_04_27_exp2_CAB	3	pyramidal	2		-56.19	TSeries_136_5			-26.2	no cnx
2018_04_27_exp2_CAB	3	pyramidal	2		-56.19	TSeries_136_6			-26.2	no cnx
2018_04_27_exp2_CAB	3	pyramidal	2		-56.19	TSeries_136_7			-26.2	no cnx
2018_04_27_exp2_CAB	3	pyramidal	2		-56.19	TSeries_26_1			-50.78	no cnx
2018_04_27_exp2_CAB	3	pyramidal	2		-56.19	TSeries_636_5			-43.6	no cnx
2018_04_27_exp2_CAB	3	pyramidal	2		-56.19	TSeries_636_4			-43.6	no cnx
2018_04_27_exp2_CAB	3	pyramidal	2		-56.19	TSeries_636_3			-43.6	no cnx
2018_04_27_exp2_CAB	3	pyramidal	2		-56.19	TSeries_636_2			-43.6	no cnx
2018_04_27_exp2_CAB	3	pyramidal	2		-56.19	TSeries_636_1			-43.6	no cnx
2018_04_27_exp2_CAB	3	pyramidal	2		-56.19	TSeries_576_1			-57.72	no cnx
2018_04_27_exp2_CAB	3	pyramidal	2		-56.19	TSeries_576_2			-57.72	no cnx
2018_04_27_exp2_CAB	3	pyramidal	2		-56.19	TSeries_576_3			-57.72	no cnx
2018_04_27_exp2_CAB	3	pyramidal	2		-56.19	TSeries_576_4			-57.72	no cnx
2018_04_27_exp2_CAB	3	pyramidal	2		-56.19	TSeries_36_10			-22.83	no cnx
2018_04_27_exp2_CAB	3	pyramidal	2		-56.19	TSeries_36_8			-22.83	no cnx
2018_04_27_exp2_CAB	3	pyramidal	2		-56.19	TSeries_36_9			-22.83	no cnx
2018_04_27_exp2_CAB	3	pyramidal	2		-56.19	TSeries_36_4			-22.83	no cnx
2018_04_27_exp2_CAB	3	pyramidal	2		-56.19	TSeries_36_5			-22.83	no cnx
2018_04_27_exp2_CAB	3	pyramidal	2		-56.19	TSeries_36_6			-22.83	no cnx
2018_04_27_exp2_CAB	3	pyramidal	2		-56.19	TSeries_36_7			-22.83	no cnx
2018_04_27_exp2_CAB	3	pyramidal	2		-56.19	TSeries_36_1			-22.83	no cnx
2018_04_27_exp2_CAB	3	pyramidal	2		-56.19	TSeries_36_2			-22.83	no cnx
2018_04_27_exp2_CAB	3	pyramidal	2		-56.19	TSeries_36_3			-22.83	no cnx

## Sheet: Scnn1a_L23pyr_map
exp_id	headstage	post_class	post_layer	postPia	post_z	MP_ID	prePia	x_ap	pre_z	cnx
2018_09_14_exp2_LH	1	pyramidal	2	261	6816.57	TSeries_107_1	405.174	129.544	6886.1	no cnx
2018_09_14_exp2_LH	1	pyramidal	2	261	6816.57	TSeries_187_1	404.488	150.13	6913.81	no cnx
2018_09_14_exp2_LH	1	pyramidal	2	261	6816.57	TSeries_147_1	390.289	-44.8542	6912.42	no cnx
2018_09_14_exp1_LH	1	pyramidal	2	309	11347.5	TSeries_27_1	354.401	130.389	11413.6	no cnx
2018_09_14_exp1_LH	1	pyramidal	2	309	11347.5	TSeries_127_2	362.088	174.504	11372.8	no cnx
2018_09_14_exp1_LH	1	pyramidal	2	309	11347.5	TSeries_127_1	376.146	98.6733	11372.8	no cnx
2018_09_14_exp1_LH	1	pyramidal	2	309	11347.5	TSeries_67_1	421.711	-42.5739	11379.5	no cnx
2018_09_14_exp1_LH	1	pyramidal	2	309	11347.5	TSeries_188_1	487.871	-237.358	11436	no cnx
2018_08_21_exp6_TH	0	pyramidal	2	231	238.535	TSeries_120_1	443.614	-69.0746	284.915	no cnx
2018_08_21_exp6_TH	0	pyramidal	2	231	238.535	TSeries_80_2	407.449	3.98646	217.595	no cnx
2018_08_21_exp6_TH	0	pyramidal	2	231	238.535	TSeries_80_1	351.992	133.199	217.595	no cnx
2018_08_21_exp6_TH	0	pyramidal	2	231	238.535	TSeries_30_2	396.195	-37.5429	251.865	excitatory
2018_08_21_exp6_TH	0	pyramidal	2	231	238.535	TSeries_30_1	399.002	-22.5619	251.865	no cnx
2018_08_21_exp5_TH	0	pyramidal	2	88	237.835	TSeries_132_1	343.452	233.14	319.775	no cnx
2018_08_21_exp5_TH	0	pyramidal	2	88	237.835	TSeries_92_1	417.81	-50.4997	364.285	no cnx
2018_08_21_exp5_TH	0	pyramidal	2	88	237.835	TSeries_172_1	491.019	421.586	275.975	no cnx
2018_08_21_exp5_TH	0	pyramidal	2	88	237.835	TSeries_112_1	393.285	207.388	219.235	no cnx
2018_08_21_exp5_TH	0	pyramidal	2	88	237.835	TSeries_32_1	335.471	-93.503	268.875	no cnx
2018_08_21_exp5_TH	0	pyramidal	2	88	237.835	TSeries_32_2	381.437	19.4502	268.875	no cnx
2018_08_21_exp5_TH	0	pyramidal	2	88	237.835	TSeries_152_1	425.263	312.043	301.875	no cnx
2018_08_21_exp5_TH	0	pyramidal	2	88	237.835	TSeries_72_1	316.637	-41.0033	339.135	no cnx
2018_08_21_exp5_TH	0	pyramidal	2	88	237.835	TSeries_192_2	445.713	463.477	243.845	no cnx
2018_08_21_exp5_TH	0	pyramidal	2	88	237.835	TSeries_192_1	451.237	477.683	243.845	no cnx
2018_08_21_exp4_TH	0	pyramidal	2	174	251.145	TSeries_91_1	443.05	231.922	340.775	no cnx
2018_08_21_exp4_TH	0	pyramidal	2	174	251.145	TSeries_91_3	491.794	339.476	340.775	no cnx
2018_08_21_exp4_TH	0	pyramidal	2	174	251.145	TSeries_91_2	359.514	181.645	340.775	no cnx
2018_08_21_exp4_TH	0	pyramidal	2	174	251.145	TSeries_31_1	384.866	-33.2319	266.475	no cnx
2018_08_21_exp4_TH	0	pyramidal	2	174	251.145	TSeries_71_1	317.305	24.1675	284.555	no cnx
2018_08_21_exp4_TH	0	pyramidal	2	174	251.145	TSeries_51_1	398.955	64.915	233.245	no cnx
2018_08_21_exp3_TH	1	pyramidal	2	241	241.545	TSeries_34_2	348.323	-7.77979	337.025	no cnx
2018_08_21_exp3_TH	1	pyramidal	2	241	241.545	TSeries_34_3	374.279	195.183	337.025	no cnx
2018_08_21_exp3_TH	1	pyramidal	2	241	241.545	TSeries_34_1	390.253	78.185	337.025	no cnx
2018_08_21_exp3_TH	1	pyramidal	2	241	241.545	TSeries_114_1	484.469	-175.056	263.865	no cnx
2018_08_21_exp3_CAB	2	pyramidal	2	248	-232.58	TSeries_207_1	451.064	43.1416	-261.1	no cnx
2018_08_21_exp3_CAB	2	pyramidal	2	248	-232.58	TSeries_187_1	440.238	-40.3837	-229.47	no cnx
2018_08_21_exp3_CAB	2	pyramidal	2	248	-232.58	TSeries_327_1	377.788	-126.7	-219.53	no cnx
2018_08_21_exp3_CAB	2	pyramidal	2	248	-232.58	TSeries_287_1	321.902	-283.166	-253.36	no cnx
2018_08_21_exp3_CAB	2	pyramidal	2	248	-232.58	TSeries_147_1	497.364	159.861	-220.31	no cnx
2018_08_21_exp3_CAB	2	pyramidal	2	248	-232.58	TSeries_267_1	398.823	-215.775	-264.96	no cnx
2018_08_21_exp3_CAB	2	pyramidal	2	248	-232.58	TSeries_247_1	366.657	-188.118	-294	no cnx
2018_08_21_exp3_CAB	2	pyramidal	2	248	-232.58	TSeries_27_2	351.784	-42.523	-296.58	no cnx
2018_08_21_exp3_CAB	2	pyramidal	2	248	-232.58	TSeries_27_1	413.702	-56.4109	-296.58	no cnx
2018_08_21_exp3_CAB	2	pyramidal	2	248	-232.58	TSeries_107_1	373.774	100.118	-227.11	no cnx
2018_08_21_exp3_CAB	2	pyramidal	2	248	-232.58	TSeries_227_1	407.189	-221.187	-302.99	no cnx
2018_08_21_exp3_CAB	1	pyramidal	2	228	-240.58	TSeries_207_1	455.132	-49.3478	-261.1	no cnx
2018_08_21_exp3_CAB	1	pyramidal	2	228	-240.58	TSeries_187_1	441.369	-132.44	-229.47	no cnx
2018_08_21_exp3_CAB	1	pyramidal	2	228	-240.58	TSeries_327_1	375.916	-216.501	-219.53	no cnx
2018_08_21_exp3_CAB	1	pyramidal	2	228	-240.58	TSeries_287_1	314.551	-370.901	-253.36	no cnx
2018_08_21_exp3_CAB	1	pyramidal	2	228	-240.58	TSeries_147_1	505.516	65.6675	-220.31	no cnx
2018_08_21_exp3_CAB	1	pyramidal	2	228	-240.58	TSeries_267_1	393.798	-306.262	-264.96	no cnx
2018_08_21_exp3_CAB	1	pyramidal	2	228	-240.58	TSeries_247_1	362.628	-277.49	-294	no cnx
2018_08_21_exp3_CAB	1	pyramidal	2	228	-240.58	TSeries_27_2	352.895	-131.461	-296.58	no cnx
2018_08_21_exp3_CAB	1	pyramidal	2	228	-240.58	TSeries_27_1	414.284	-147.522	-296.58	no cnx
2018_08_21_exp3_CAB	1	pyramidal	2	228	-240.58	TSeries_107_1	379.897	10.3171	-227.11	no cnx
2018_08_21_exp3_CAB	1	pyramidal	2	228	-240.58	TSeries_227_1	401.968	-311.966	-302.99	no cnx
2018_08_21_exp2_TH	1	pyramidal	2	277	269.285	TSeries_138_1	383.514	-251.693	281.785	no cnx
2018_08_21_exp2_TH	1	pyramidal	2	277	269.285	TSeries_158_1	466.053	-282.622	262.115	no cnx
2018_08_21_exp2_TH	1	pyramidal	2	277	269.285	TSeries_58_1	362.976	-96.0837	342.715	no cnx
2018_08_21_exp2_TH	1	pyramidal	2	277	269.285	TSeries_58_2	421.289	-17.9894	342.715	no cnx
2018_08_21_exp2_TH	1	pyramidal	2	277	269.285	TSeries_98_1	351.492	-131.474	373.525	no cnx
2018_08_21_exp2_TH	1	pyramidal	2	277	269.285	TSeries_38_1	427.474	100.498	331.835	no cnx
2018_08_21_exp2_TH	1	pyramidal	2	277	269.285	TSeries_118_1	386.524	-255.847	348.115	no cnx
2018_08_21_exp2_CAB	2	pyramidal	2	308	-212.52	TSeries_207_1	333.922	-175.498	-132.96	no cnx
2018_08_21_exp2_CAB	2	pyramidal	2	308	-212.52	TSeries_147_1	485.533	-23.2027	-136.99	no cnx
2018_08_21_exp2_CAB	2	pyramidal	2	308	-212.52	TSeries_27_2	289.905	67.5642	-206.29	no cnx
2018_08_21_exp2_CAB	2	pyramidal	2	308	-212.52	TSeries_27_1	492.281	-21.8698	-206.29	no cnx
2018_08_21_exp1_TH	1	pyramidal	2	164	58.435	TSeries_34_1	424.367	153.577	101.455	no cnx
2018_08_21_exp1_TH	1	pyramidal	2	164	58.435	TSeries_94_1	399.041	357.887	145.035	no cnx
2018_08_21_exp1_TH	1	pyramidal	2	164	58.435	TSeries_54_1	421.691	83.1287	129.935	no cnx
2018_08_21_exp1_TH	1	pyramidal	2	164	58.435	TSeries_74_1	353.36	312.44	113.705	no cnx
2018_08_21_exp1_CAB	2	pyramidal	2	183	-247.989	TSeries_26_1	399.75	81.5665	-194.289	no cnx
2018_08_21_exp1_CAB	1	pyramidal	2	259	-240.829	TSeries_26_1	399.946	62.5267	-194.289	no cnx
2018_05_02_exp3_TH	1	pyramidal	2	179	3.117	TSeries_37_1	362.579	-2.79432	20.767	no cnx
2018_05_02_exp3_TH	1	pyramidal	2	179	3.117	TSeries_37_3	450.582	-39.4226	20.767	no cnx
2018_05_02_exp3_TH	1	pyramidal	2	179	3.117	TSeries_37_2	384.295	-65.6014	20.767	no cnx
2018_05_02_exp3_TH	1	pyramidal	2	179	3.117	TSeries_297_1	392.954	-123.948	-89.463	no cnx
2018_05_02_exp3_TH	1	pyramidal	2	179	3.117	TSeries_377_2	461.877	-32.6867	3.807	no cnx
2018_05_02_exp3_TH	1	pyramidal	2	179	3.117	TSeries_377_1	314.19	-45.2312	3.807	no cnx
2018_05_02_exp3_TH	1	pyramidal	2	179	3.117	TSeries_117_2	402.543	95.8931	-11.473	no cnx
2018_05_02_exp3_TH	1	pyramidal	2	179	3.117	TSeries_117_1	404.649	-2.63075	-11.473	no cnx
2018_05_02_exp3_TH	1	pyramidal	2	179	3.117	TSeries_317_1	376.46	35.9791	-107.293	no cnx
2018_05_02_exp3_TH	1	pyramidal	2	179	3.117	TSeries_317_2	394.505	151.761	-107.293	no cnx
2018_05_02_exp3_TH	1	pyramidal	2	179	3.117	TSeries_357_1	420.127	95.7029	26.897	no cnx
2018_05_02_exp3_TH	1	pyramidal	2	179	3.117	TSeries_197_1	307.665	39.6432	-42.873	no cnx
2018_05_02_exp3_TH	1	pyramidal	2	179	3.117	TSeries_157_1	410.108	17.5506	-24.253	no cnx
2018_05_02_exp3_TH	1	pyramidal	2	179	3.117	TSeries_217_1	439.241	-56.7622	-69.923	no cnx
2018_05_02_exp3_TH	1	pyramidal	2	179	3.117	TSeries_217_2	457.918	-27.5903	-69.923	excitatory
2018_05_02_exp3_TH	1	pyramidal	2	179	3.117	TSeries_177_1	423.766	60.4317	-31.043	no cnx
2018_05_02_exp3_TH	1	pyramidal	2	179	3.117	TSeries_97_1	320.316	-44.7997	1.577	no cnx
2018_05_02_exp2_TH	1	pyramidal	2	203	107.007	TSeries_118_1	386.429	13.0862	107.627	no cnx
2018_05_02_exp2_TH	1	pyramidal	2	203	107.007	TSeries_38_1	372.875	-94.3182	96.187	no cnx
2018_05_02_exp2_TH	1	pyramidal	2	203	107.007	TSeries_378_1	372.761	13.17	88.987	no cnx
2018_05_02_exp2_TH	1	pyramidal	2	203	107.007	TSeries_378_2	344.427	228.867	88.987	no cnx
2018_05_02_exp2_TH	1	pyramidal	2	203	107.007	TSeries_318_2	361.135	57.6447	108.827	no cnx
2018_05_02_exp2_TH	1	pyramidal	2	203	107.007	TSeries_318_3	324.292	244.034	108.827	no cnx
2018_05_02_exp2_TH	1	pyramidal	2	203	107.007	TSeries_318_1	428.643	3.31282	108.827	no cnx
2018_05_02_exp2_TH	1	pyramidal	2	203	107.007	TSeries_298_1	440.593	157.873	165.417	no cnx
2018_05_02_exp2_TH	1	pyramidal	2	203	107.007	TSeries_198_1	411.244	190.311	67.617	excitatory
2018_05_02_exp2_TH	1	pyramidal	2	203	107.007	TSeries_258_2	354.333	156.907	146.717	no cnx
2018_05_02_exp2_TH	1	pyramidal	2	203	107.007	TSeries_258_1	393.378	196.485	146.717	no cnx
2018_05_02_exp2_TH	1	pyramidal	2	203	107.007	TSeries_138_2	371.659	57.6281	120.977	no cnx
2018_05_02_exp2_TH	1	pyramidal	2	203	107.007	TSeries_138_1	438.967	1.99586	120.977	no cnx
2018_05_02_exp2_TH	0	pyramidal	2	207	127.007	TSeries_118_1	408.073	65.9616	107.627	no cnx
2018_05_02_exp2_TH	0	pyramidal	2	207	127.007	TSeries_38_1	383.725	-39.521	96.187	excitatory
2018_05_02_exp2_TH	0	pyramidal	2	207	127.007	TSeries_378_1	394.484	67.4273	88.987	no cnx
2018_05_02_exp2_TH	0	pyramidal	2	207	127.007	TSeries_378_2	388.112	284.884	88.987	no cnx
2018_05_02_exp2_TH	0	pyramidal	2	207	127.007	TSeries_318_2	387.416	112.85	108.827	no cnx
2018_05_02_exp2_TH	0	pyramidal	2	207	127.007	TSeries_318_3	369.614	302.01	108.827	no cnx
2018_05_02_exp2_TH	0	pyramidal	2	207	127.007	TSeries_318_1	449.082	51.9684	108.827	no cnx
2018_05_02_exp2_TH	0	pyramidal	2	207	127.007	TSeries_298_1	476.604	204.527	165.417	no cnx
2018_05_02_exp2_TH	0	pyramidal	2	207	127.007	TSeries_198_1	450.687	239.767	67.617	no cnx
2018_05_02_exp2_TH	0	pyramidal	2	207	127.007	TSeries_258_2	390.688	212.291	146.717	no cnx
2018_05_02_exp2_TH	0	pyramidal	2	207	127.007	TSeries_258_1	433.537	247.717	146.717	no cnx
2018_05_02_exp2_TH	0	pyramidal	2	207	127.007	TSeries_138_2	397.884	111.769	120.977	no cnx
2018_05_02_exp2_TH	0	pyramidal	2	207	127.007	TSeries_138_1	459.22	49.6139	120.977	no cnx
2018_05_02_exp2_CAB	3	pyramidal	2	165	7447.56	TSeries_226_1	367.361	-74.048	7425.59	no cnx
2018_05_02_exp2_CAB	3	pyramidal	2	165	7447.56	TSeries_166_1	404.503	-136.91	7396.67	excitatory
2018_05_02_exp2_CAB	3	pyramidal	2	165	7447.56	TSeries_26_1	407.669	-140.645	7402.77	excitatory
2018_05_02_exp2_CAB	3	pyramidal	2	165	7447.56	TSeries_66_2	425.094	-99.0134	7414.14	excitatory
2018_05_02_exp2_CAB	3	pyramidal	2	165	7447.56	TSeries_66_1	404.433	-155.995	7414.14	no cnx
2018_05_02_exp2_CAB	2	pyramidal	2	163	7448.56	TSeries_226_1	357.031	-24.8504	7425.59	excitatory
2018_05_02_exp2_CAB	2	pyramidal	2	163	7448.56	TSeries_166_1	409.165	-75.9693	7396.67	no cnx
2018_05_02_exp2_CAB	2	pyramidal	2	163	7448.56	TSeries_26_1	413.189	-78.759	7402.77	no cnx
2018_05_02_exp2_CAB	2	pyramidal	2	163	7448.56	TSeries_66_2	419.256	-34.0372	7414.14	no cnx
2018_05_02_exp2_CAB	2	pyramidal	2	163	7448.56	TSeries_66_1	414.033	-94.4237	7414.14	excitatory
2018_05_02_exp1_TH	0	pyramidal	2	152	267.597	TSeries_118_1	471.305	-10.8306	292.677	no cnx
2018_05_02_exp1_TH	0	pyramidal	2	152	267.597	TSeries_38_2	408.723	-115.046	241.957	no cnx
2018_05_02_exp1_TH	0	pyramidal	2	152	267.597	TSeries_38_1	359.082	61.6078	241.957	no cnx
2018_05_02_exp1_TH	0	pyramidal	2	152	267.597	TSeries_218_2	364.843	55.5646	207.337	no cnx
2018_05_02_exp1_TH	0	pyramidal	2	152	267.597	TSeries_218_1	487.962	59.0082	207.337	no cnx
2018_05_02_exp1_TH	0	pyramidal	2	152	267.597	TSeries_158_1	357.088	189.159	220.277	no cnx
2018_05_02_exp1_TH	0	pyramidal	2	152	267.597	TSeries_78_2	387.388	-20.8333	275.027	no cnx
2018_05_02_exp1_TH	0	pyramidal	2	152	267.597	TSeries_78_1	422.876	21.1808	275.027	no cnx
2018_05_02_exp1_TH	0	pyramidal	2	152	267.597	TSeries_258_1	407.989	27.9169	260.567	no cnx
2018_05_02_exp1_TH	0	pyramidal	2	152	267.597	TSeries_138_1	396.894	33.8619	341.327	no cnx
2018_05_01_exp2_TH	0	pyramidal	2	180	192.439	TSeries_33_1	389.351	-43.6405	146.559	excitatory
2018_05_01_exp2_TH	0	pyramidal	2	180	192.439	TSeries_133_1	394.961	-145.105	206.439	no cnx
2018_05_01_exp2_TH	0	pyramidal	2	180	192.439	TSeries_113_1	417.074	-133.728	182.869	no cnx
2018_05_01_exp1_TH	0	pyramidal	2	209	178.169	TSeries_37_1	386.263	11.7778	144.849	no cnx
2018_05_01_exp1_TH	0	pyramidal	2	209	178.169	TSeries_297_1	359.409	-13.2747	209.609	no cnx
2018_05_01_exp1_TH	0	pyramidal	2	209	178.169	TSeries_117_1	364.072	-9.9998	213.739	no cnx
2018_05_01_exp1_TH	0	pyramidal	2	209	178.169	TSeries_257_1	430.056	-234.715	164.719	no cnx
2018_05_01_exp1_TH	0	pyramidal	2	209	178.169	TSeries_137_1	371.764	146.204	194.109	no cnx
2018_05_01_exp1_TH	0	pyramidal	2	209	178.169	TSeries_137_2	414.382	219.888	194.109	no cnx
2018_05_01_exp1_TH	0	pyramidal	2	209	178.169	TSeries_277_1	433.959	-1.95957	183.139	no cnx
2018_05_01_exp1_TH	0	pyramidal	2	209	178.169	TSeries_77_1	438.827	-0.712822	186.759	no cnx
2018_05_01_exp1_TH	0	pyramidal	2	209	178.169	TSeries_77_2	374.455	142.79	186.759	no cnx
2018_05_01_exp1_TH	0	pyramidal	2	209	178.169	TSeries_217_1	395.963	-244.441	152.699	no cnx
2018_05_01_exp1_TH	0	pyramidal	2	209	178.169	TSeries_217_2	468.766	-63.1754	152.699	no cnx
2018_05_01_exp1_TH	0	pyramidal	2	209	178.169	TSeries_57_1	475.764	-60.6567	157.529	no cnx
2018_05_01_exp1_TH	0	pyramidal	2	209	178.169	TSeries_177_1	403.029	273.299	172.279	no cnx
2018_02_28_exp1_TH	0	pyramidal	2	103	-158.837	TSeries_336_2	410.96	-99.815	-130.997	no cnx
2018_02_28_exp1_TH	0	pyramidal	2	103	-158.837	TSeries_336_1	363.566	-16.111	-130.997	excitatory
2018_02_28_exp1_TH	0	pyramidal	2	103	-158.837	TSeries_326_1	398.85	-60.3394	-139.287	no cnx
2018_02_28_exp1_TH	0	pyramidal	2	103	-158.837	TSeries_436_1	376.086	11.1981	-164.597	excitatory
2018_02_28_exp1_TH	0	pyramidal	2	103	-158.837	TSeries_436_2	399.963	-15.6075	-164.597	no cnx
2018_02_28_exp1_TH	0	pyramidal	2	103	-158.837	TSeries_516_1	390.811	-59.2786	-142.607	no cnx
2018_02_28_exp1_TH	0	pyramidal	2	103	-158.837	TSeries_506_1	451.712	16.9162	-153.097	no cnx

## Sheet: Fig5B_exc_conn_vs_pia
Penk_F4B_bins	50	150	250	350	450	550	650	750	850	950	1050
Penk_F4B_midX	100	200	300	400	500	600	700	800	900	1000
Penk_F4B_probed_hist	317	319	73	0	0	0	0	0	0	0
Penk_F4B_exc_hist	8	8	0	0	0	0	0	0	0	0
Penk_F4B_exc_frac	0.0252366	0.0250784	0	nan	nan	nan	nan	nan	nan	nan
Penk_F4B_exc_ci_low	0.0120016	0.0119259	6.70348e-06	0.00154133	0.00154133	0.00154133	0.00154133	0.00154133	0.00154133	0.00154133
Penk_F4B_exc_ci_high	0.0470508	0.0467594	0.0337109	0.998459	0.998459	0.998459	0.998459	0.998459	0.998459	0.998459
Tlx3_F4B_bins	50	150	250	350	450	550	650	750	850	950	1050
Tlx3_F4B_midX	100	200	300	400	500	600	700	800	900	1000
Tlx3_F4B_probed_hist	0	0	7	117	533	465	156	9	0	0
Tlx3_F4B_exc_hist	0	0	2	11	32	26	10	0	0	0
Tlx3_F4B_exc_frac	nan	nan	0.285714	0.0940171	0.0600375	0.055914	0.0641026	0	nan	nan
Tlx3_F4B_exc_ci_low	0.00154133	0.00154133	0.0647283	0.0509857	0.0422106	0.037727	0.0334312	5.30641e-05	0.00154133	0.00154133
Tlx3_F4B_exc_ci_high	0.998459	0.998459	0.647662	0.156798	0.0826225	0.0796017	0.110722	0.23761	0.998459	0.998459
Rorb_F4B_bins	50	150	250	350	450	550	650	750	850	950	1050
Rorb_F4B_midX	100	200	300	400	500	600	700	800	900	1000
Rorb_F4B_probed_hist	6	44	426	1091	740	386	160	100	44	22
Rorb_F4B_exc_hist	0	2	26	108	74	23	4	2	0	0
Rorb_F4B_exc_frac	0	0.0454545	0.0610329	0.0989918	0.1	0.0595855	0.025	0.02	0	0
Rorb_F4B_exc_ci_low	7.84998e-05	0.00956461	0.041215	0.0823329	0.0799471	0.0391902	0.00849608	0.00417881	1.10966e-05	2.20673e-05
Rorb_F4B_exc_ci_high	0.330389	0.137915	0.0867842	0.117775	0.123174	0.0865468	0.0583379	0.0626058	0.0551836	0.10674
Ntsr1_F4B_bins	50	150	250	350	450	550	650	750	850	950	1050
Ntsr1_F4B_midX	100	200	300	400	500	600	700	800	900	1000
Ntsr1_F4B_probed_hist	0	0	0	0	0	0	69	342	342	30
Ntsr1_F4B_exc_hist	0	0	0	0	0	0	0	0	1	0
Ntsr1_F4B_exc_frac	nan	nan	nan	nan	nan	nan	0	0	0.00292398	0
Ntsr1_F4B_exc_ci_low	0.00154133	0.00154133	0.00154133	0.00154133	0.00154133	0.00154133	7.09068e-06	1.43472e-06	0.000315671	1.62319e-05
Ntsr1_F4B_exc_ci_high	0.998459	0.998459	0.998459	0.998459	0.998459	0.998459	0.0356229	0.00731262	0.0135842	0.0796782
Scnn1a_F4B_bins	50	150	250	350	450	550	650	750	850	950	1050
Scnn1a_F4B_midX	100	200	300	400	500	600	700	800	900	1000
Scnn1a_F4B_probed_hist	0	0	13	114	20	0	0	0	0	0
Scnn1a_F4B_exc_hist	0	0	0	11	1	0	0	0	0	0
Scnn1a_F4B_exc_frac	nan	nan	0	0.0964912	0.05	nan	nan	nan	nan	nan
Scnn1a_F4B_exc_ci_low	0.00154133	0.00154133	3.70519e-05	0.0523566	0.00544903	0.00154133	0.00154133	0.00154133	0.00154133	0.00154133
Scnn1a_F4B_exc_ci_high	0.998459	0.998459	0.172619	0.160765	0.210819	0.998459	0.998459	0.998459	0.998459	0.998459

## Sheet: Fig5C_exc_L23FSI_map
exp_id	headstage	post_class	post_layer	postPia	post_z	MP_ID	presynapticCre	presynapticEffector	prePia	x_ap	pre_z	cnx
2020_10_23_exp2_TH	1	interneuron	2	219	572.634	Point 5	Tlx3	ChrimsonR_kv_eyfp_AAV	451.075	106.844	570.664	no cnx
2020_10_23_exp2_TH	1	interneuron	2	219	572.634	Point 4	Tlx3	ChrimsonR_kv_eyfp_AAV	458.449	33.0839	570.664	no cnx
2020_10_23_exp2_TH	1	interneuron	2	219	572.634	Point 7	Tlx3	ChrimsonR_kv_eyfp_AAV	591.831	-84.1301	566.214	no cnx
2020_10_23_exp2_TH	1	interneuron	2	219	572.634	Point 6	Tlx3	ChrimsonR_kv_eyfp_AAV	480.874	-30.4043	566.214	no cnx
2020_10_23_exp2_TH	1	interneuron	2	219	572.634	Point 1	Tlx3	ChrimsonR_kv_eyfp_AAV	429.89	-76.7017	570.654	no cnx
2020_10_23_exp2_TH	1	interneuron	2	219	572.634	Point 3	Tlx3	ChrimsonR_kv_eyfp_AAV	465.742	-44.1844	570.654	no cnx
2020_10_23_exp2_TH	1	interneuron	2	219	572.634	Point 2	Tlx3	ChrimsonR_kv_eyfp_AAV	440.159	-40.8702	570.654	no cnx
2020_10_23_exp2_TH	1	interneuron	2	219	572.634	Point 9	Tlx3	ChrimsonR_kv_eyfp_AAV	589.553	-38.0096	566.214	no cnx
2020_10_23_exp2_TH	1	interneuron	2	219	572.634	Point 8	Tlx3	ChrimsonR_kv_eyfp_AAV	544.049	-4.37135	566.214	no cnx
2020_10_23_exp2_TH	1	interneuron	2	219	572.634	Point 11	Tlx3	ChrimsonR_kv_eyfp_AAV	601.246	27.054	566.214	no cnx
2020_10_23_exp2_TH	1	interneuron	2	219	572.634	Point 10	Tlx3	ChrimsonR_kv_eyfp_AAV	622.735	-32.9379	566.214	no cnx
2020_10_23_exp2_TH	1	interneuron	2	219	572.634	Point 13	Tlx3	ChrimsonR_kv_eyfp_AAV	539.071	90.4447	559.724	no cnx
2020_10_23_exp2_TH	1	interneuron	2	219	572.634	Point 12	Tlx3	ChrimsonR_kv_eyfp_AAV	436.832	45.0116	565.484	no cnx
2020_10_23_exp2_TH	1	interneuron	2	219	572.634	Point 15	Tlx3	ChrimsonR_kv_eyfp_AAV	535.585	-5.81318	559.724	no cnx
2020_10_23_exp2_TH	1	interneuron	2	219	572.634	Point 14	Tlx3	ChrimsonR_kv_eyfp_AAV	467.199	28.0238	559.724	no cnx
2020_10_23_exp2_TH	1	interneuron	2	219	572.634	Point 17	Tlx3	ChrimsonR_kv_eyfp_AAV	442.26	57.7491	565.484	no cnx
2020_10_23_exp2_TH	1	interneuron	2	219	572.634	Point 16	Tlx3	ChrimsonR_kv_eyfp_AAV	602.92	42.5926	559.724	no cnx
2020_10_23_exp2_TH	1	interneuron	2	219	572.634	Point 19	Tlx3	ChrimsonR_kv_eyfp_AAV	441.426	47.2394	556.444	no cnx
2020_10_23_exp2_TH	1	interneuron	2	219	572.634	Point 18	Tlx3	ChrimsonR_kv_eyfp_AAV	437.682	35.4166	558.634	excitatory
2020_10_23_exp2_TH	1	interneuron	2	219	572.634	Point 20	Tlx3	ChrimsonR_kv_eyfp_AAV	441.752	68.211	556.444	no cnx
2020_08_21_exp1_TH	3	interneuron	2	133	67.844	Point 11	Penk	ChrimsonR_kv_eyfp_AAV	224.337	141.728	54.564	no cnx
2020_08_21_exp1_TH	3	interneuron	2	133	67.844	Point 10	Penk	ChrimsonR_kv_eyfp_AAV	184.39	174.056	59.584	no cnx
2020_08_21_exp1_TH	3	interneuron	2	133	67.844	Point 13	Penk	ChrimsonR_kv_eyfp_AAV	191.911	205.225	45.364	no cnx
2020_08_21_exp1_TH	3	interneuron	2	133	67.844	Point 12	Penk	ChrimsonR_kv_eyfp_AAV	311.923	64.3973	54.564	no cnx
2020_08_21_exp1_TH	3	interneuron	2	133	67.844	Point 15	Penk	ChrimsonR_kv_eyfp_AAV	88.7701	143.601	45.364	no cnx
2020_08_21_exp1_TH	3	interneuron	2	133	67.844	Point 14	Penk	ChrimsonR_kv_eyfp_AAV	121.106	156.772	45.364	no cnx
2020_08_21_exp1_TH	3	interneuron	2	133	67.844	Point 17	Penk	ChrimsonR_kv_eyfp_AAV	238.316	93.2248	45.364	no cnx
2020_08_21_exp1_TH	3	interneuron	2	133	67.844	Point 16	Penk	ChrimsonR_kv_eyfp_AAV	169.557	-10.751	43.054	no cnx
2020_08_21_exp1_TH	3	interneuron	2	133	67.844	Point 19	Penk	ChrimsonR_kv_eyfp_AAV	217.888	-37.0548	43.054	no cnx
2020_08_21_exp1_TH	3	interneuron	2	133	67.844	Point 18	Penk	ChrimsonR_kv_eyfp_AAV	156.642	-39.2035	43.054	excitatory
2020_08_21_exp1_TH	3	interneuron	2	133	67.844	Point 31	Penk	ChrimsonR_kv_eyfp_AAV	134.234	202.418	23.344	no cnx
2020_08_21_exp1_TH	3	interneuron	2	133	67.844	Point 30	Penk	ChrimsonR_kv_eyfp_AAV	266.88	113.006	23.344	no cnx
2020_08_21_exp1_TH	3	interneuron	2	133	67.844	Point 37	Penk	ChrimsonR_kv_eyfp_AAV	77.1693	64.6461	15.704	no cnx
2020_08_21_exp1_TH	3	interneuron	2	133	67.844	Point 36	Penk	ChrimsonR_kv_eyfp_AAV	164.553	199.046	15.704	no cnx
2020_08_21_exp1_TH	3	interneuron	2	133	67.844	Point 35	Penk	ChrimsonR_kv_eyfp_AAV	145.868	231.685	15.704	no cnx
2020_08_21_exp1_TH	3	interneuron	2	133	67.844	Point 34	Penk	ChrimsonR_kv_eyfp_AAV	159.628	224.107	23.344	no cnx
2020_08_21_exp1_TH	3	interneuron	2	133	67.844	Point 5	Penk	ChrimsonR_kv_eyfp_AAV	234.271	157.854	68.664	no cnx
2020_08_21_exp1_TH	3	interneuron	2	133	67.844	Point 4	Penk	ChrimsonR_kv_eyfp_AAV	97.3838	133.648	68.664	no cnx
2020_08_21_exp1_TH	3	interneuron	2	133	67.844	Point 7	Penk	ChrimsonR_kv_eyfp_AAV	111.651	69.0382	59.584	no cnx
2020_08_21_exp1_TH	3	interneuron	2	133	67.844	Point 6	Penk	ChrimsonR_kv_eyfp_AAV	144.058	124.961	68.664	no cnx
2020_08_21_exp1_TH	3	interneuron	2	133	67.844	Point 1	Penk	ChrimsonR_kv_eyfp_AAV	140.917	-49.5152	76.574	no cnx
2020_08_21_exp1_TH	3	interneuron	2	133	67.844	Point 3	Penk	ChrimsonR_kv_eyfp_AAV	69.7638	132.321	76.574	no cnx
2020_08_21_exp1_TH	3	interneuron	2	133	67.844	Point 2	Penk	ChrimsonR_kv_eyfp_AAV	297.563	-55.705	76.574	no cnx
2020_08_21_exp1_TH	3	interneuron	2	133	67.844	Point 9	Penk	ChrimsonR_kv_eyfp_AAV	140.577	157.851	59.584	no cnx
2020_08_21_exp1_TH	3	interneuron	2	133	67.844	Point 8	Penk	ChrimsonR_kv_eyfp_AAV	158.68	127.774	59.584	no cnx
2020_08_21_exp1_TH	3	interneuron	2	133	67.844	Point 32	Penk	ChrimsonR_kv_eyfp_AAV	93.2321	197.443	23.344	no cnx
2020_08_21_exp1_TH	3	interneuron	2	133	67.844	Point 48	Penk	ChrimsonR_kv_eyfp_AAV	84.5424	73.1968	47.894	no cnx
2020_08_21_exp1_TH	3	interneuron	2	133	67.844	Point 49	Penk	ChrimsonR_kv_eyfp_AAV	240.627	184.644	47.894	no cnx
2020_08_21_exp1_TH	3	interneuron	2	133	67.844	Point 42	Penk	ChrimsonR_kv_eyfp_AAV	194.363	98.5442	7.464	no cnx
2020_08_21_exp1_TH	3	interneuron	2	133	67.844	Point 43	Penk	ChrimsonR_kv_eyfp_AAV	82.6147	61.9872	7.464	no cnx
2020_08_21_exp1_TH	3	interneuron	2	133	67.844	Point 40	Penk	ChrimsonR_kv_eyfp_AAV	135.904	190.75	7.464	no cnx
2020_08_21_exp1_TH	3	interneuron	2	133	67.844	Point 41	Penk	ChrimsonR_kv_eyfp_AAV	75.4596	124.746	7.464	no cnx
2020_08_21_exp1_TH	3	interneuron	2	133	67.844	Point 46	Penk	ChrimsonR_kv_eyfp_AAV	168.641	115.524	47.894	no cnx
2020_08_21_exp1_TH	3	interneuron	2	133	67.844	Point 47	Penk	ChrimsonR_kv_eyfp_AAV	142.499	134.84	47.894	no cnx
2020_08_21_exp1_TH	3	interneuron	2	133	67.844	Point 44	Penk	ChrimsonR_kv_eyfp_AAV	100.26	76.237	7.464	no cnx
2020_08_21_exp1_TH	3	interneuron	2	133	67.844	Point 45	Penk	ChrimsonR_kv_eyfp_AAV	127.803	174.522	47.894	no cnx
2020_08_21_exp1_TH	3	interneuron	2	133	67.844	Point 28	Penk	ChrimsonR_kv_eyfp_AAV	106.183	123.165	23.344	excitatory
2020_08_21_exp1_TH	3	interneuron	2	133	67.844	Point 29	Penk	ChrimsonR_kv_eyfp_AAV	162.342	149.704	23.344	no cnx
2020_08_21_exp1_TH	3	interneuron	2	133	67.844	Point 20	Penk	ChrimsonR_kv_eyfp_AAV	219.294	-45.5852	43.054	no cnx
2020_08_21_exp1_TH	3	interneuron	2	133	67.844	Point 21	Penk	ChrimsonR_kv_eyfp_AAV	114.658	3.68187	35.484	excitatory
2020_08_21_exp1_TH	3	interneuron	2	133	67.844	Point 22	Penk	ChrimsonR_kv_eyfp_AAV	140.512	21.4324	35.484	excitatory
2020_08_21_exp1_TH	3	interneuron	2	133	67.844	Point 23	Penk	ChrimsonR_kv_eyfp_AAV	190.275	30.0556	35.484	no cnx
2020_08_21_exp1_TH	3	interneuron	2	133	67.844	Point 24	Penk	ChrimsonR_kv_eyfp_AAV	246.849	21.7207	35.484	no cnx
2020_08_21_exp1_TH	3	interneuron	2	133	67.844	Point 25	Penk	ChrimsonR_kv_eyfp_AAV	161.586	20.3934	35.484	excitatory
2020_08_21_exp1_TH	3	interneuron	2	133	67.844	Point 26	Penk	ChrimsonR_kv_eyfp_AAV	115.713	21.1136	35.484	no cnx
2020_08_21_exp1_TH	3	interneuron	2	133	67.844	Point 27	Penk	ChrimsonR_kv_eyfp_AAV	180.684	-8.35097	23.344	excitatory
2020_08_21_exp1_TH	3	interneuron	2	133	67.844	Point 39	Penk	ChrimsonR_kv_eyfp_AAV	200.547	254.848	15.704	no cnx
2020_08_21_exp1_TH	3	interneuron	2	133	67.844	Point 33	Penk	ChrimsonR_kv_eyfp_AAV	274.481	187.104	23.344	no cnx
2020_08_21_exp1_TH	3	interneuron	2	133	67.844	Point 38	Penk	ChrimsonR_kv_eyfp_AAV	102.233	139.919	15.704	no cnx
2020_07_03_exp2_TH	1	interneuron	2	219	263.274	Point 11	Rorb	ChrimsonR_kv_eyfp_AAV	406.599	-87.739	273.074	no cnx
2020_07_03_exp2_TH	1	interneuron	2	219	263.274	Point 10	Rorb	ChrimsonR_kv_eyfp_AAV	344.995	-96.7069	273.074	no cnx
2020_07_03_exp2_TH	1	interneuron	2	219	263.274	Point 13	Rorb	ChrimsonR_kv_eyfp_AAV	437.996	-62.142	273.074	no cnx
2020_07_03_exp2_TH	1	interneuron	2	219	263.274	Point 12	Rorb	ChrimsonR_kv_eyfp_AAV	371.241	-159.159	269.374	excitatory
2020_07_03_exp2_TH	1	interneuron	2	219	263.274	Point 15	Rorb	ChrimsonR_kv_eyfp_AAV	411.189	-93.765	273.074	no cnx
2020_07_03_exp2_TH	1	interneuron	2	219	263.274	Point 14	Rorb	ChrimsonR_kv_eyfp_AAV	452.646	-38.0762	273.074	no cnx
2020_07_03_exp2_TH	1	interneuron	2	219	263.274	Point 17	Rorb	ChrimsonR_kv_eyfp_AAV	391.202	-129.869	271.844	no cnx
2020_07_03_exp2_TH	1	interneuron	2	219	263.274	Point 16	Rorb	ChrimsonR_kv_eyfp_AAV	474.745	-85.9222	273.074	no cnx
2020_07_03_exp2_TH	1	interneuron	2	219	263.274	Point 19	Rorb	ChrimsonR_kv_eyfp_AAV	413.944	-139.595	271.844	no cnx
2020_07_03_exp2_TH	1	interneuron	2	219	263.274	Point 18	Rorb	ChrimsonR_kv_eyfp_AAV	336.718	-148.142	271.844	no cnx
2020_07_03_exp2_TH	1	interneuron	2	219	263.274	Point 5	Rorb	ChrimsonR_kv_eyfp_AAV	340.68	-160.889	280.654	no cnx
2020_07_03_exp2_TH	1	interneuron	2	219	263.274	Point 4	Rorb	ChrimsonR_kv_eyfp_AAV	400.992	-131.15	280.654	no cnx
2020_07_03_exp2_TH	1	interneuron	2	219	263.274	Point 7	Rorb	ChrimsonR_kv_eyfp_AAV	405.34	-119.092	280.654	no cnx
2020_07_03_exp2_TH	1	interneuron	2	219	263.274	Point 6	Rorb	ChrimsonR_kv_eyfp_AAV	436.603	-77.0329	280.654	no cnx
2020_07_03_exp2_TH	1	interneuron	2	219	263.274	Point 1	Rorb	ChrimsonR_kv_eyfp_AAV	410.89	-39.0674	280.654	no cnx
2020_07_03_exp2_TH	1	interneuron	2	219	263.274	Point 3	Rorb	ChrimsonR_kv_eyfp_AAV	358.91	-15.0912	280.654	no cnx
2020_07_03_exp2_TH	1	interneuron	2	219	263.274	Point 2	Rorb	ChrimsonR_kv_eyfp_AAV	354.219	-51.6589	280.654	no cnx
2020_07_03_exp2_TH	1	interneuron	2	219	263.274	Point 9	Rorb	ChrimsonR_kv_eyfp_AAV	327.973	31.6968	273.074	no cnx
2020_07_03_exp2_TH	1	interneuron	2	219	263.274	Point 8	Rorb	ChrimsonR_kv_eyfp_AAV	469.816	-66.7864	280.654	no cnx
2020_07_03_exp2_TH	1	interneuron	2	219	263.274	Point 20	Rorb	ChrimsonR_kv_eyfp_AAV	420.094	-177.209	271.844	no cnx
2020_07_03_exp2_TH	1	interneuron	2	219	263.274	Point 21	Rorb	ChrimsonR_kv_eyfp_AAV	397.247	-135.174	284.984	no cnx
2020_07_03_exp2_TH	1	interneuron	2	219	263.274	Point 22	Rorb	ChrimsonR_kv_eyfp_AAV	358.176	-172.732	284.984	no cnx
2020_07_03_exp2_TH	1	interneuron	2	219	263.274	Point 23	Rorb	ChrimsonR_kv_eyfp_AAV	369.076	-172.773	284.984	no cnx
2020_07_03_exp2_TH	1	interneuron	2	219	263.274	Point 24	Rorb	ChrimsonR_kv_eyfp_AAV	383.083	-156.139	284.984	excitatory
2020_07_03_exp2_TH	1	interneuron	2	219	263.274	Point 25	Rorb	ChrimsonR_kv_eyfp_AAV	355.703	-164.545	270.174	no cnx
2020_07_03_exp2_TH	1	interneuron	2	219	263.274	Point 26	Rorb	ChrimsonR_kv_eyfp_AAV	403.78	-197.471	270.174	no cnx
2020_07_03_exp2_TH	1	interneuron	2	219	263.274	Point 27	Rorb	ChrimsonR_kv_eyfp_AAV	342.078	-131.186	270.184	no cnx
2020_06_11_exp2_TH	1	interneuron	2	240	252.874	Point 5	Rorb	Ai167	357.55	6.37913	216.434	no cnx
2020_06_11_exp2_TH	1	interneuron	2	240	252.874	Point 4	Rorb	Ai167	345.589	131.413	243.274	no cnx
2020_06_11_exp2_TH	1	interneuron	2	240	252.874	Point 7	Rorb	Ai167	433.15	-32.5793	205.404	excitatory
2020_06_11_exp2_TH	1	interneuron	2	240	252.874	Point 6	Rorb	Ai167	485.697	12.109	216.434	excitatory
2020_06_11_exp2_TH	1	interneuron	2	240	252.874	Point 1	Rorb	Ai167	394.212	152.126	288.104	no cnx
2020_06_11_exp2_TH	1	interneuron	2	240	252.874	Point 3	Rorb	Ai167	349.811	-19.9491	250.604	no cnx
2020_06_11_exp2_TH	1	interneuron	2	240	252.874	Point 2	Rorb	Ai167	372.584	127.216	277.834	no cnx
2020_06_11_exp2_TH	1	interneuron	2	240	252.874	Point 8	Rorb	Ai167	525.088	-72.9552	205.404	excitatory
2020_06_11_exp2_TH	1	interneuron	2	240	252.874	Point 12	Rorb	Ai167	501.218	22.7147	231.294	no cnx
2020_05_28_exp2_TH	1	interneuron	2	240	118.954	Point 11	Rorb	ChrimsonR_kv_eyfp_AAV	317.981	-143.635	123.244	no cnx
2020_05_28_exp2_TH	1	interneuron	2	240	118.954	Point 10	Rorb	ChrimsonR_kv_eyfp_AAV	366.389	-149.604	123.244	no cnx
2020_05_28_exp2_TH	1	interneuron	2	240	118.954	Point 13	Rorb	ChrimsonR_kv_eyfp_AAV	352.53	67.6436	123.244	no cnx
2020_05_28_exp2_TH	1	interneuron	2	240	118.954	Point 12	Rorb	ChrimsonR_kv_eyfp_AAV	329.933	-119.077	123.244	no cnx
2020_05_28_exp2_TH	1	interneuron	2	240	118.954	Point 15	Rorb	ChrimsonR_kv_eyfp_AAV	460.98	15.3463	123.244	no cnx
2020_05_28_exp2_TH	1	interneuron	2	240	118.954	Point 14	Rorb	ChrimsonR_kv_eyfp_AAV	367.489	15.753	123.244	excitatory
2020_05_28_exp2_TH	1	interneuron	2	240	118.954	Point 17	Rorb	ChrimsonR_kv_eyfp_AAV	324.045	1.26685	114.444	excitatory
2020_05_28_exp2_TH	1	interneuron	2	240	118.954	Point 16	Rorb	ChrimsonR_kv_eyfp_AAV	513.645	-91.4944	123.244	no cnx
2020_05_28_exp2_TH	1	interneuron	2	240	118.954	Point 19	Rorb	ChrimsonR_kv_eyfp_AAV	397.242	11.572	117.654	no cnx
2020_05_28_exp2_TH	1	interneuron	2	240	118.954	Point 18	Rorb	ChrimsonR_kv_eyfp_AAV	335.344	-31.2391	117.654	no cnx
2020_05_28_exp2_TH	1	interneuron	2	240	118.954	Point 31	Rorb	ChrimsonR_kv_eyfp_AAV	506.344	105.73	105.164	no cnx
2020_05_28_exp2_TH	1	interneuron	2	240	118.954	Point 30	Rorb	ChrimsonR_kv_eyfp_AAV	470.004	118.73	96.194	excitatory
2020_05_28_exp2_TH	1	interneuron	2	240	118.954	Point 5	Rorb	ChrimsonR_kv_eyfp_AAV	345.583	43.1584	126.674	no cnx
2020_05_28_exp2_TH	1	interneuron	2	240	118.954	Point 4	Rorb	ChrimsonR_kv_eyfp_AAV	451.812	-46.2846	126.674	no cnx
2020_05_28_exp2_TH	1	interneuron	2	240	118.954	Point 7	Rorb	ChrimsonR_kv_eyfp_AAV	337.754	92.5299	126.674	no cnx
2020_05_28_exp2_TH	1	interneuron	2	240	118.954	Point 6	Rorb	ChrimsonR_kv_eyfp_AAV	488.694	-28.4485	126.674	no cnx
2020_05_28_exp2_TH	1	interneuron	2	240	118.954	Point 1	Rorb	ChrimsonR_kv_eyfp_AAV	344.335	57.2065	126.674	no cnx
2020_05_28_exp2_TH	1	interneuron	2	240	118.954	Point 3	Rorb	ChrimsonR_kv_eyfp_AAV	406.225	-113.056	126.674	no cnx
2020_05_28_exp2_TH	1	interneuron	2	240	118.954	Point 2	Rorb	ChrimsonR_kv_eyfp_AAV	351.921	-45.4645	126.674	no cnx
2020_05_28_exp2_TH	1	interneuron	2	240	118.954	Point 9	Rorb	ChrimsonR_kv_eyfp_AAV	349.169	78.2721	123.244	no cnx
2020_05_28_exp2_TH	1	interneuron	2	240	118.954	Point 8	Rorb	ChrimsonR_kv_eyfp_AAV	376.14	55.1689	126.674	no cnx
2020_05_28_exp2_TH	1	interneuron	2	240	118.954	Point 32	Rorb	ChrimsonR_kv_eyfp_AAV	474.456	136.649	96.194	no cnx
2020_05_28_exp2_TH	1	interneuron	2	240	118.954	Point 28	Rorb	ChrimsonR_kv_eyfp_AAV	367.332	-67.3061	108.514	no cnx
2020_05_28_exp2_TH	1	interneuron	2	240	118.954	Point 29	Rorb	ChrimsonR_kv_eyfp_AAV	485.049	87.1525	96.194	excitatory
2020_05_28_exp2_TH	1	interneuron	2	240	118.954	Point 20	Rorb	ChrimsonR_kv_eyfp_AAV	323.922	-23.0423	117.654	no cnx
2020_05_28_exp2_TH	1	interneuron	2	240	118.954	Point 21	Rorb	ChrimsonR_kv_eyfp_AAV	323.299	1.69229	106.704	no cnx
2020_05_28_exp2_TH	1	interneuron	2	240	118.954	Point 22	Rorb	ChrimsonR_kv_eyfp_AAV	309.742	-24.5187	106.704	no cnx
2020_05_28_exp2_TH	1	interneuron	2	240	118.954	Point 23	Rorb	ChrimsonR_kv_eyfp_AAV	333.364	44.1439	106.704	no cnx
2020_05_28_exp2_TH	1	interneuron	2	240	118.954	Point 24	Rorb	ChrimsonR_kv_eyfp_AAV	475.617	67.9673	108.514	no cnx
2020_05_28_exp2_TH	1	interneuron	2	240	118.954	Point 25	Rorb	ChrimsonR_kv_eyfp_AAV	436.089	119.007	108.514	no cnx
2020_05_28_exp2_TH	1	interneuron	2	240	118.954	Point 26	Rorb	ChrimsonR_kv_eyfp_AAV	485.309	-54.5076	108.514	no cnx
2020_05_28_exp2_TH	1	interneuron	2	240	118.954	Point 27	Rorb	ChrimsonR_kv_eyfp_AAV	385.594	-61.241	108.514	no cnx
2020_05_28_exp2_TH	1	interneuron	2	240	118.954	Point 33	Rorb	ChrimsonR_kv_eyfp_AAV	511.64	73.9514	105.164	no cnx
2020_05_28_exp2_TH	0	interneuron	2	235	107.274	Point 10	Rorb	ChrimsonR_kv_eyfp_AAV	366.115	-30.0265	123.244	no cnx
2020_05_28_exp2_TH	0	interneuron	2	235	107.274	Point 12	Rorb	ChrimsonR_kv_eyfp_AAV	329.659	0.501164	123.244	excitatory
2020_05_28_exp2_TH	0	interneuron	2	235	107.274	Point 14	Rorb	ChrimsonR_kv_eyfp_AAV	367.215	135.331	123.244	no cnx
2020_05_28_exp2_TH	0	interneuron	2	235	107.274	Point 16	Rorb	ChrimsonR_kv_eyfp_AAV	513.372	28.0834	123.244	no cnx
2020_05_28_exp2_TH	0	interneuron	2	235	107.274	Point 5	Rorb	ChrimsonR_kv_eyfp_AAV	345.31	162.736	126.674	no cnx
2020_05_28_exp2_TH	0	interneuron	2	235	107.274	Point 4	Rorb	ChrimsonR_kv_eyfp_AAV	451.539	73.2932	126.674	no cnx
2020_05_28_exp2_TH	0	interneuron	2	235	107.274	Point 7	Rorb	ChrimsonR_kv_eyfp_AAV	337.481	212.108	126.674	no cnx
2020_05_28_exp2_TH	0	interneuron	2	235	107.274	Point 6	Rorb	ChrimsonR_kv_eyfp_AAV	488.42	91.1293	126.674	no cnx
2020_05_28_exp2_TH	0	interneuron	2	235	107.274	Point 1	Rorb	ChrimsonR_kv_eyfp_AAV	344.062	176.784	126.674	no cnx
2020_05_28_exp2_TH	0	interneuron	2	235	107.274	Point 3	Rorb	ChrimsonR_kv_eyfp_AAV	405.951	6.52199	126.674	no cnx
2020_05_28_exp2_TH	0	interneuron	2	235	107.274	Point 2	Rorb	ChrimsonR_kv_eyfp_AAV	351.647	74.1133	126.674	no cnx
2020_05_28_exp2_TH	0	interneuron	2	235	107.274	Point 9	Rorb	ChrimsonR_kv_eyfp_AAV	348.895	197.85	123.244	no cnx
2020_05_28_exp2_TH	0	interneuron	2	235	107.274	Point 8	Rorb	ChrimsonR_kv_eyfp_AAV	375.866	174.747	126.674	no cnx
2020_05_27_exp3_TH	0	interneuron	2	185	63.6512	Point 11	Penk	ChrimsonR_kv_eyfp_AAV	234.15	79.9643	46.841	no cnx
2020_05_27_exp3_TH	0	interneuron	2	185	63.6512	Point 10	Penk	ChrimsonR_kv_eyfp_AAV	176.778	-82.6858	46.841	no cnx
2020_05_27_exp3_TH	0	interneuron	2	185	63.6512	Point 13	Penk	ChrimsonR_kv_eyfp_AAV	195.92	-86.8029	50.661	excitatory
2020_05_27_exp3_TH	0	interneuron	2	185	63.6512	Point 12	Penk	ChrimsonR_kv_eyfp_AAV	268.746	42.2753	50.661	excitatory
2020_05_27_exp3_TH	0	interneuron	2	185	63.6512	Point 15	Penk	ChrimsonR_kv_eyfp_AAV	144.43	56.7296	46.841	no cnx
2020_05_27_exp3_TH	0	interneuron	2	185	63.6512	Point 14	Penk	ChrimsonR_kv_eyfp_AAV	197.383	-141.284	46.841	no cnx
2020_05_27_exp3_TH	0	interneuron	2	185	63.6512	Point 17	Penk	ChrimsonR_kv_eyfp_AAV	236.703	1.01596	41.561	excitatory
2020_05_27_exp3_TH	0	interneuron	2	185	63.6512	Point 16	Penk	ChrimsonR_kv_eyfp_AAV	205.054	-4.13911	41.561	excitatory
2020_05_27_exp3_TH	0	interneuron	2	185	63.6512	Point 19	Penk	ChrimsonR_kv_eyfp_AAV	188.582	126.335	35.851	no cnx
2020_05_27_exp3_TH	0	interneuron	2	185	63.6512	Point 18	Penk	ChrimsonR_kv_eyfp_AAV	178.263	56.807	35.851	no cnx
2020_05_27_exp3_TH	0	interneuron	2	185	63.6512	Point 31	Penk	ChrimsonR_kv_eyfp_AAV	139.453	-83.1682	45.861	no cnx
2020_05_27_exp3_TH	0	interneuron	2	185	63.6512	Point 30	Penk	ChrimsonR_kv_eyfp_AAV	249.982	-124.951	50.701	no cnx
2020_05_27_exp3_TH	0	interneuron	2	185	63.6512	Point 37	Penk	ChrimsonR_kv_eyfp_AAV	190.947	-150.333	45.861	no cnx
2020_05_27_exp3_TH	0	interneuron	2	185	63.6512	Point 36	Penk	ChrimsonR_kv_eyfp_AAV	290.838	-179.299	45.861	no cnx
2020_05_27_exp3_TH	0	interneuron	2	185	63.6512	Point 35	Penk	ChrimsonR_kv_eyfp_AAV	180.022	-134.52	45.861	no cnx
2020_05_27_exp3_TH	0	interneuron	2	185	63.6512	Point 34	Penk	ChrimsonR_kv_eyfp_AAV	182.961	-234.756	45.861	no cnx
2020_05_27_exp3_TH	0	interneuron	2	185	63.6512	Point 5	Penk	ChrimsonR_kv_eyfp_AAV	198.924	-103.631	51.061	excitatory
2020_05_27_exp3_TH	0	interneuron	2	185	63.6512	Point 4	Penk	ChrimsonR_kv_eyfp_AAV	269.327	-97.201	49.671	no cnx
2020_05_27_exp3_TH	0	interneuron	2	185	63.6512	Point 7	Penk	ChrimsonR_kv_eyfp_AAV	177.808	-169.014	49.671	no cnx
2020_05_27_exp3_TH	0	interneuron	2	185	63.6512	Point 6	Penk	ChrimsonR_kv_eyfp_AAV	232.715	-134.324	51.061	excitatory
2020_05_27_exp3_TH	0	interneuron	2	185	63.6512	Point 1	Penk	ChrimsonR_kv_eyfp_AAV	168.776	-43.0204	51.061	no cnx
2020_05_27_exp3_TH	0	interneuron	2	185	63.6512	Point 3	Penk	ChrimsonR_kv_eyfp_AAV	192.155	-77.9339	49.671	no cnx
2020_05_27_exp3_TH	0	interneuron	2	185	63.6512	Point 2	Penk	ChrimsonR_kv_eyfp_AAV	257.852	32.7424	49.671	no cnx
2020_05_27_exp3_TH	0	interneuron	2	185	63.6512	Point 9	Penk	ChrimsonR_kv_eyfp_AAV	205.947	-91.8689	51.061	excitatory
2020_05_27_exp3_TH	0	interneuron	2	185	63.6512	Point 8	Penk	ChrimsonR_kv_eyfp_AAV	334.649	-125.042	51.061	no cnx
2020_05_27_exp3_TH	0	interneuron	2	185	63.6512	Point 32	Penk	ChrimsonR_kv_eyfp_AAV	223.504	-2.17299	45.861	excitatory
2020_05_27_exp3_TH	0	interneuron	2	185	63.6512	Point 28	Penk	ChrimsonR_kv_eyfp_AAV	318.642	-164.134	50.701	no cnx
2020_05_27_exp3_TH	0	interneuron	2	185	63.6512	Point 29	Penk	ChrimsonR_kv_eyfp_AAV	324.288	-83.9697	50.701	no cnx
2020_05_27_exp3_TH	0	interneuron	2	185	63.6512	Point 20	Penk	ChrimsonR_kv_eyfp_AAV	249.83	203.312	35.851	no cnx
2020_05_27_exp3_TH	0	interneuron	2	185	63.6512	Point 21	Penk	ChrimsonR_kv_eyfp_AAV	190.869	55.7529	35.851	no cnx
2020_05_27_exp3_TH	0	interneuron	2	185	63.6512	Point 22	Penk	ChrimsonR_kv_eyfp_AAV	246.889	140.5	35.851	no cnx
2020_05_27_exp3_TH	0	interneuron	2	185	63.6512	Point 23	Penk	ChrimsonR_kv_eyfp_AAV	203.499	119.527	41.561	excitatory
2020_05_27_exp3_TH	0	interneuron	2	185	63.6512	Point 24	Penk	ChrimsonR_kv_eyfp_AAV	138.814	-249.502	50.701	no cnx
2020_05_27_exp3_TH	0	interneuron	2	185	63.6512	Point 25	Penk	ChrimsonR_kv_eyfp_AAV	181.389	-151.047	50.701	no cnx
2020_05_27_exp3_TH	0	interneuron	2	185	63.6512	Point 26	Penk	ChrimsonR_kv_eyfp_AAV	177.851	-229.05	50.701	no cnx
2020_05_27_exp3_TH	0	interneuron	2	185	63.6512	Point 27	Penk	ChrimsonR_kv_eyfp_AAV	213.161	-271.666	50.701	no cnx
2020_05_27_exp3_TH	0	interneuron	2	185	63.6512	Point 33	Penk	ChrimsonR_kv_eyfp_AAV	196.785	-169.475	45.861	no cnx
2020_05_26_exp2_TH	3	interneuron	2	171	0.950862	Point 51	Penk	ChrimsonR_kv_eyfp_AAV	176.285	204.147	-41.099	no cnx
2020_05_26_exp2_TH	3	interneuron	2	171	0.950862	Point 50	Penk	ChrimsonR_kv_eyfp_AAV	122.1	179.088	-41.099	no cnx
2020_05_26_exp2_TH	3	interneuron	2	171	0.950862	Point 11	Penk	ChrimsonR_kv_eyfp_AAV	171.029	-203.101	8.881	no cnx
2020_05_26_exp2_TH	3	interneuron	2	171	0.950862	Point 13	Penk	ChrimsonR_kv_eyfp_AAV	160.193	-85.2786	8.881	no cnx
2020_05_26_exp2_TH	3	interneuron	2	171	0.950862	Point 12	Penk	ChrimsonR_kv_eyfp_AAV	141.083	-249.456	8.881	no cnx
2020_05_26_exp2_TH	3	interneuron	2	171	0.950862	Point 15	Penk	ChrimsonR_kv_eyfp_AAV	149.117	-23.9712	8.881	no cnx
2020_05_26_exp2_TH	3	interneuron	2	171	0.950862	Point 14	Penk	ChrimsonR_kv_eyfp_AAV	319.695	-75.4335	8.881	no cnx
2020_05_26_exp2_TH	3	interneuron	2	171	0.950862	Point 17	Penk	ChrimsonR_kv_eyfp_AAV	305.336	57.3837	-0.129	no cnx
2020_05_26_exp2_TH	3	interneuron	2	171	0.950862	Point 16	Penk	ChrimsonR_kv_eyfp_AAV	310.899	-31.6852	8.881	no cnx
2020_05_26_exp2_TH	3	interneuron	2	171	0.950862	Point 19	Penk	ChrimsonR_kv_eyfp_AAV	160.822	-124.82	-0.129	excitatory
2020_05_26_exp2_TH	3	interneuron	2	171	0.950862	Point 18	Penk	ChrimsonR_kv_eyfp_AAV	201.038	-94.7652	-0.129	no cnx
2020_05_26_exp2_TH	3	interneuron	2	171	0.950862	Point 31	Penk	ChrimsonR_kv_eyfp_AAV	256.386	-58.3907	-18.389	no cnx
2020_05_26_exp2_TH	3	interneuron	2	171	0.950862	Point 30	Penk	ChrimsonR_kv_eyfp_AAV	122.906	-99.6393	-18.389	no cnx
2020_05_26_exp2_TH	3	interneuron	2	171	0.950862	Point 37	Penk	ChrimsonR_kv_eyfp_AAV	108.619	-49.1586	-29.339	no cnx
2020_05_26_exp2_TH	3	interneuron	2	171	0.950862	Point 35	Penk	ChrimsonR_kv_eyfp_AAV	137.916	-14.361	-18.389	excitatory
2020_05_26_exp2_TH	3	interneuron	2	171	0.950862	Point 34	Penk	ChrimsonR_kv_eyfp_AAV	109.976	-22.1314	-18.389	excitatory
2020_05_26_exp2_TH	3	interneuron	2	171	0.950862	Point 32	Penk	ChrimsonR_kv_eyfp_AAV	122.372	16.5746	-18.389	excitatory
2020_05_26_exp2_TH	3	interneuron	2	171	0.950862	Point 48	Penk	ChrimsonR_kv_eyfp_AAV	163.05	224.09	-41.099	no cnx
2020_05_26_exp2_TH	3	interneuron	2	171	0.950862	Point 49	Penk	ChrimsonR_kv_eyfp_AAV	217.981	327.741	-41.099	no cnx
2020_05_26_exp2_TH	3	interneuron	2	171	0.950862	Point 42	Penk	ChrimsonR_kv_eyfp_AAV	163.738	165.387	-29.339	no cnx
2020_05_26_exp2_TH	3	interneuron	2	171	0.950862	Point 43	Penk	ChrimsonR_kv_eyfp_AAV	220.853	61.6017	-28.709	excitatory
2020_05_26_exp2_TH	3	interneuron	2	171	0.950862	Point 40	Penk	ChrimsonR_kv_eyfp_AAV	150.026	96.2456	-29.339	no cnx
2020_05_26_exp2_TH	3	interneuron	2	171	0.950862	Point 41	Penk	ChrimsonR_kv_eyfp_AAV	120.361	46.9644	-29.339	no cnx
2020_05_26_exp2_TH	3	interneuron	2	171	0.950862	Point 46	Penk	ChrimsonR_kv_eyfp_AAV	108.515	33.0682	-38.199	excitatory
2020_05_26_exp2_TH	3	interneuron	2	171	0.950862	Point 47	Penk	ChrimsonR_kv_eyfp_AAV	140.795	181.566	-38.199	excitatory
2020_05_26_exp2_TH	3	interneuron	2	171	0.950862	Point 44	Penk	ChrimsonR_kv_eyfp_AAV	123.771	205.528	-29.339	no cnx
2020_05_26_exp2_TH	3	interneuron	2	171	0.950862	Point 28	Penk	ChrimsonR_kv_eyfp_AAV	101.135	-109.525	-18.389	excitatory
2020_05_26_exp2_TH	3	interneuron	2	171	0.950862	Point 29	Penk	ChrimsonR_kv_eyfp_AAV	154.359	-191.901	-18.389	excitatory
2020_05_26_exp2_TH	3	interneuron	2	171	0.950862	Point 20	Penk	ChrimsonR_kv_eyfp_AAV	155.792	-212.887	-0.129	no cnx
2020_05_26_exp2_TH	3	interneuron	2	171	0.950862	Point 21	Penk	ChrimsonR_kv_eyfp_AAV	128.291	-184.905	-0.129	no cnx
2020_05_26_exp2_TH	3	interneuron	2	171	0.950862	Point 22	Penk	ChrimsonR_kv_eyfp_AAV	134.332	-29.9025	-0.129	excitatory
2020_05_26_exp2_TH	3	interneuron	2	171	0.950862	Point 23	Penk	ChrimsonR_kv_eyfp_AAV	147.373	-127.182	-0.129	no cnx
2020_05_26_exp2_TH	3	interneuron	2	171	0.950862	Point 24	Penk	ChrimsonR_kv_eyfp_AAV	191.874	-137.966	-3.349	no cnx
2020_05_26_exp2_TH	3	interneuron	2	171	0.950862	Point 25	Penk	ChrimsonR_kv_eyfp_AAV	204.5	-123.873	-6.149	no cnx
2020_05_26_exp2_TH	3	interneuron	2	171	0.950862	Point 26	Penk	ChrimsonR_kv_eyfp_AAV	107.819	-154.937	-6.149	no cnx
2020_05_26_exp2_TH	3	interneuron	2	171	0.950862	Point 27	Penk	ChrimsonR_kv_eyfp_AAV	123.383	-28.0771	-3.349	excitatory
2020_05_26_exp2_TH	3	interneuron	2	171	0.950862	Point 39	Penk	ChrimsonR_kv_eyfp_AAV	172.402	-5.25108	-29.339	excitatory
2020_05_26_exp2_TH	3	interneuron	2	171	0.950862	Point 33	Penk	ChrimsonR_kv_eyfp_AAV	129.08	-115.095	-18.389	excitatory
2020_05_26_exp2_TH	3	interneuron	2	171	0.950862	Point 38	Penk	ChrimsonR_kv_eyfp_AAV	208.538	6.903	-29.339	no cnx
2019_08_09_exp3_TH	0	interneuron	2	198	327.106	Point 11	Tlx3	ChrimsonR_kv_eyfp_AAV	715.671	-520.992	340.776	no cnx
2019_08_09_exp3_TH	0	interneuron	2	198	327.106	Point 10	Tlx3	ChrimsonR_kv_eyfp_AAV	582.153	-601.534	340.776	no cnx
2019_08_09_exp3_TH	0	interneuron	2	198	327.106	Point 13	Tlx3	ChrimsonR_kv_eyfp_AAV	548.112	-455.101	376.286	no cnx
2019_08_09_exp3_TH	0	interneuron	2	198	327.106	Point 12	Tlx3	ChrimsonR_kv_eyfp_AAV	572.871	-574.872	340.776	no cnx
2019_08_09_exp3_TH	0	interneuron	2	198	327.106	Point 15	Tlx3	ChrimsonR_kv_eyfp_AAV	647.747	-436.65	376.286	no cnx
2019_08_09_exp3_TH	0	interneuron	2	198	327.106	Point 14	Tlx3	ChrimsonR_kv_eyfp_AAV	664.187	-282.716	376.286	no cnx
2019_08_09_exp3_TH	0	interneuron	2	198	327.106	Point 17	Tlx3	ChrimsonR_kv_eyfp_AAV	688.759	-440.807	376.286	no cnx
2019_08_09_exp3_TH	0	interneuron	2	198	327.106	Point 16	Tlx3	ChrimsonR_kv_eyfp_AAV	541.59	-477.984	376.286	no cnx
2019_08_09_exp3_TH	0	interneuron	2	198	327.106	Point 19	Tlx3	ChrimsonR_kv_eyfp_AAV	565.154	-529.859	371.506	no cnx
2019_08_09_exp3_TH	0	interneuron	2	198	327.106	Point 18	Tlx3	ChrimsonR_kv_eyfp_AAV	558.478	-452.694	371.506	no cnx
2019_08_09_exp3_TH	0	interneuron	2	198	327.106	Point 31	Tlx3	ChrimsonR_kv_eyfp_AAV	480.008	449.024	332.666	no cnx
2019_08_09_exp3_TH	0	interneuron	2	198	327.106	Point 30	Tlx3	ChrimsonR_kv_eyfp_AAV	485.965	-152.571	375.296	no cnx
2019_08_09_exp3_TH	0	interneuron	2	198	327.106	Point 37	Tlx3	ChrimsonR_kv_eyfp_AAV	505.93	394.168	316.776	excitatory
2019_08_09_exp3_TH	0	interneuron	2	198	327.106	Point 36	Tlx3	ChrimsonR_kv_eyfp_AAV	453.901	342.212	316.776	no cnx
2019_08_09_exp3_TH	0	interneuron	2	198	327.106	Point 35	Tlx3	ChrimsonR_kv_eyfp_AAV	522.023	459.837	332.666	no cnx
2019_08_09_exp3_TH	0	interneuron	2	198	327.106	Point 34	Tlx3	ChrimsonR_kv_eyfp_AAV	556.398	393.136	332.666	no cnx
2019_08_09_exp3_TH	0	interneuron	2	198	327.106	Point 5	Tlx3	ChrimsonR_kv_eyfp_AAV	596.647	-571.357	351.176	no cnx
2019_08_09_exp3_TH	0	interneuron	2	198	327.106	Point 4	Tlx3	ChrimsonR_kv_eyfp_AAV	722.431	-561.538	357.056	no cnx
2019_08_09_exp3_TH	0	interneuron	2	198	327.106	Point 7	Tlx3	ChrimsonR_kv_eyfp_AAV	710.866	-496.606	351.176	no cnx
2019_08_09_exp3_TH	0	interneuron	2	198	327.106	Point 6	Tlx3	ChrimsonR_kv_eyfp_AAV	612.034	-532.534	351.176	no cnx
2019_08_09_exp3_TH	0	interneuron	2	198	327.106	Point 1	Tlx3	ChrimsonR_kv_eyfp_AAV	556.976	-641.198	357.056	no cnx
2019_08_09_exp3_TH	0	interneuron	2	198	327.106	Point 3	Tlx3	ChrimsonR_kv_eyfp_AAV	570.573	-602.117	357.056	no cnx
2019_08_09_exp3_TH	0	interneuron	2	198	327.106	Point 2	Tlx3	ChrimsonR_kv_eyfp_AAV	625.739	-536.934	357.056	no cnx
2019_08_09_exp3_TH	0	interneuron	2	198	327.106	Point 9	Tlx3	ChrimsonR_kv_eyfp_AAV	618.619	-498.981	340.776	no cnx
2019_08_09_exp3_TH	0	interneuron	2	198	327.106	Point 8	Tlx3	ChrimsonR_kv_eyfp_AAV	611.047	-585.302	340.776	no cnx
2019_08_09_exp3_TH	0	interneuron	2	198	327.106	Point 32	Tlx3	ChrimsonR_kv_eyfp_AAV	543.911	369.613	332.666	no cnx
2019_08_09_exp3_TH	0	interneuron	2	198	327.106	Point 28	Tlx3	ChrimsonR_kv_eyfp_AAV	597.249	-644.084	322.966	no cnx
2019_08_09_exp3_TH	0	interneuron	2	198	327.106	Point 29	Tlx3	ChrimsonR_kv_eyfp_AAV	509.917	-108.986	375.296	no cnx
2019_08_09_exp3_TH	0	interneuron	2	198	327.106	Point 20	Tlx3	ChrimsonR_kv_eyfp_AAV	560.371	-376.615	371.506	no cnx
2019_08_09_exp3_TH	0	interneuron	2	198	327.106	Point 21	Tlx3	ChrimsonR_kv_eyfp_AAV	500.153	-318.618	371.506	no cnx
2019_08_09_exp3_TH	0	interneuron	2	198	327.106	Point 22	Tlx3	ChrimsonR_kv_eyfp_AAV	593.28	-389.373	359.896	no cnx
2019_08_09_exp3_TH	0	interneuron	2	198	327.106	Point 23	Tlx3	ChrimsonR_kv_eyfp_AAV	579.578	-495.384	359.896	no cnx
2019_08_09_exp3_TH	0	interneuron	2	198	327.106	Point 24	Tlx3	ChrimsonR_kv_eyfp_AAV	622.917	-517.131	359.896	no cnx
2019_08_09_exp3_TH	0	interneuron	2	198	327.106	Point 25	Tlx3	ChrimsonR_kv_eyfp_AAV	602.168	-532.275	359.896	no cnx
2019_08_09_exp3_TH	0	interneuron	2	198	327.106	Point 26	Tlx3	ChrimsonR_kv_eyfp_AAV	611.933	-497.753	359.896	no cnx
2019_08_09_exp3_TH	0	interneuron	2	198	327.106	Point 27	Tlx3	ChrimsonR_kv_eyfp_AAV	584.343	-611.904	322.966	no cnx
2019_08_09_exp3_TH	0	interneuron	2	198	327.106	Point 33	Tlx3	ChrimsonR_kv_eyfp_AAV	590.701	425.587	332.666	no cnx
2019_08_09_exp3_TH	0	interneuron	2	198	327.106	Point 38	Tlx3	ChrimsonR_kv_eyfp_AAV	472.004	369.773	316.776	no cnx
2019_08_09_exp2_TH	0	interneuron	2	207	207.586	Point 51	Tlx3	ChrimsonR_kv_eyfp_AAV	741.105	-423.309	231.226	no cnx
2019_08_09_exp2_TH	0	interneuron	2	207	207.586	Point 50	Tlx3	ChrimsonR_kv_eyfp_AAV	593.333	-217.481	231.226	no cnx
2019_08_09_exp2_TH	0	interneuron	2	207	207.586	Point 52	Tlx3	ChrimsonR_kv_eyfp_AAV	616.216	-239.007	231.226	excitatory
2019_08_09_exp2_TH	0	interneuron	2	207	207.586	Point 11	Tlx3	ChrimsonR_kv_eyfp_AAV	610.652	-542.457	229.966	no cnx
2019_08_09_exp2_TH	0	interneuron	2	207	207.586	Point 10	Tlx3	ChrimsonR_kv_eyfp_AAV	681.315	-530.184	229.966	no cnx
2019_08_09_exp2_TH	0	interneuron	2	207	207.586	Point 13	Tlx3	ChrimsonR_kv_eyfp_AAV	659.802	-429.738	229.966	no cnx
2019_08_09_exp2_TH	0	interneuron	2	207	207.586	Point 12	Tlx3	ChrimsonR_kv_eyfp_AAV	746.035	-524.7	229.966	no cnx
2019_08_09_exp2_TH	0	interneuron	2	207	207.586	Point 15	Tlx3	ChrimsonR_kv_eyfp_AAV	625.197	-418.746	229.966	no cnx
2019_08_09_exp2_TH	0	interneuron	2	207	207.586	Point 14	Tlx3	ChrimsonR_kv_eyfp_AAV	671.342	-372.948	229.966	excitatory
2019_08_09_exp2_TH	0	interneuron	2	207	207.586	Point 17	Tlx3	ChrimsonR_kv_eyfp_AAV	635.077	-485.591	221.816	no cnx
2019_08_09_exp2_TH	0	interneuron	2	207	207.586	Point 16	Tlx3	ChrimsonR_kv_eyfp_AAV	777.288	-504.697	229.966	no cnx
2019_08_09_exp2_TH	0	interneuron	2	207	207.586	Point 19	Tlx3	ChrimsonR_kv_eyfp_AAV	835.232	-575.587	221.816	no cnx
2019_08_09_exp2_TH	0	interneuron	2	207	207.586	Point 18	Tlx3	ChrimsonR_kv_eyfp_AAV	672.377	-604.909	221.816	no cnx
2019_08_09_exp2_TH	0	interneuron	2	207	207.586	Point 31	Tlx3	ChrimsonR_kv_eyfp_AAV	746.151	-501.182	221.596	no cnx
2019_08_09_exp2_TH	0	interneuron	2	207	207.586	Point 30	Tlx3	ChrimsonR_kv_eyfp_AAV	650.724	-570.914	221.596	no cnx
2019_08_09_exp2_TH	0	interneuron	2	207	207.586	Point 37	Tlx3	ChrimsonR_kv_eyfp_AAV	613.764	-676.435	221.596	no cnx
2019_08_09_exp2_TH	0	interneuron	2	207	207.586	Point 36	Tlx3	ChrimsonR_kv_eyfp_AAV	728.991	-428.574	221.596	no cnx
2019_08_09_exp2_TH	0	interneuron	2	207	207.586	Point 35	Tlx3	ChrimsonR_kv_eyfp_AAV	644.456	-661.792	221.596	no cnx
2019_08_09_exp2_TH	0	interneuron	2	207	207.586	Point 34	Tlx3	ChrimsonR_kv_eyfp_AAV	680.556	-452.901	221.596	no cnx
2019_08_09_exp2_TH	0	interneuron	2	207	207.586	Point 5	Tlx3	ChrimsonR_kv_eyfp_AAV	587.196	-395.185	249.206	no cnx
2019_08_09_exp2_TH	0	interneuron	2	207	207.586	Point 4	Tlx3	ChrimsonR_kv_eyfp_AAV	654.042	-475.071	249.206	no cnx
2019_08_09_exp2_TH	0	interneuron	2	207	207.586	Point 7	Tlx3	ChrimsonR_kv_eyfp_AAV	603.717	-534.689	249.206	no cnx
2019_08_09_exp2_TH	0	interneuron	2	207	207.586	Point 6	Tlx3	ChrimsonR_kv_eyfp_AAV	716.397	-286.599	249.206	no cnx
2019_08_09_exp2_TH	0	interneuron	2	207	207.586	Point 1	Tlx3	ChrimsonR_kv_eyfp_AAV	615.914	-457.042	249.206	no cnx
2019_08_09_exp2_TH	0	interneuron	2	207	207.586	Point 3	Tlx3	ChrimsonR_kv_eyfp_AAV	551.425	-409.935	249.206	no cnx
2019_08_09_exp2_TH	0	interneuron	2	207	207.586	Point 2	Tlx3	ChrimsonR_kv_eyfp_AAV	661.185	-330.138	249.206	no cnx
2019_08_09_exp2_TH	0	interneuron	2	207	207.586	Point 9	Tlx3	ChrimsonR_kv_eyfp_AAV	779.886	-524.341	229.966	no cnx
2019_08_09_exp2_TH	0	interneuron	2	207	207.586	Point 8	Tlx3	ChrimsonR_kv_eyfp_AAV	614.09	-408.139	249.206	no cnx
2019_08_09_exp2_TH	0	interneuron	2	207	207.586	Point 32	Tlx3	ChrimsonR_kv_eyfp_AAV	631.312	-671.618	221.596	no cnx
2019_08_09_exp2_TH	0	interneuron	2	207	207.586	Point 48	Tlx3	ChrimsonR_kv_eyfp_AAV	567.816	-388.686	231.226	no cnx
2019_08_09_exp2_TH	0	interneuron	2	207	207.586	Point 49	Tlx3	ChrimsonR_kv_eyfp_AAV	513.418	-303.024	231.226	no cnx
2019_08_09_exp2_TH	0	interneuron	2	207	207.586	Point 42	Tlx3	ChrimsonR_kv_eyfp_AAV	725.741	-504.011	221.886	no cnx
2019_08_09_exp2_TH	0	interneuron	2	207	207.586	Point 43	Tlx3	ChrimsonR_kv_eyfp_AAV	747.563	-469.104	221.886	no cnx
2019_08_09_exp2_TH	0	interneuron	2	207	207.586	Point 40	Tlx3	ChrimsonR_kv_eyfp_AAV	588.994	-683.708	221.886	no cnx
2019_08_09_exp2_TH	0	interneuron	2	207	207.586	Point 41	Tlx3	ChrimsonR_kv_eyfp_AAV	708.639	-532.099	221.886	no cnx
2019_08_09_exp2_TH	0	interneuron	2	207	207.586	Point 46	Tlx3	ChrimsonR_kv_eyfp_AAV	620.328	-485.644	221.886	no cnx
2019_08_09_exp2_TH	0	interneuron	2	207	207.586	Point 47	Tlx3	ChrimsonR_kv_eyfp_AAV	675.276	-283.677	231.226	no cnx
2019_08_09_exp2_TH	0	interneuron	2	207	207.586	Point 44	Tlx3	ChrimsonR_kv_eyfp_AAV	693.951	-515.737	221.886	no cnx
2019_08_09_exp2_TH	0	interneuron	2	207	207.586	Point 45	Tlx3	ChrimsonR_kv_eyfp_AAV	594.041	-540.427	221.886	no cnx
2019_08_09_exp2_TH	0	interneuron	2	207	207.586	Point 28	Tlx3	ChrimsonR_kv_eyfp_AAV	635.967	-627.517	221.596	no cnx
2019_08_09_exp2_TH	0	interneuron	2	207	207.586	Point 29	Tlx3	ChrimsonR_kv_eyfp_AAV	747.549	-676.631	221.596	no cnx
2019_08_09_exp2_TH	0	interneuron	2	207	207.586	Point 20	Tlx3	ChrimsonR_kv_eyfp_AAV	700.627	-463.279	221.816	no cnx
2019_08_09_exp2_TH	0	interneuron	2	207	207.586	Point 21	Tlx3	ChrimsonR_kv_eyfp_AAV	800.546	-573.71	221.816	no cnx
2019_08_09_exp2_TH	0	interneuron	2	207	207.586	Point 22	Tlx3	ChrimsonR_kv_eyfp_AAV	723.708	-395.683	221.816	no cnx
2019_08_09_exp2_TH	0	interneuron	2	207	207.586	Point 23	Tlx3	ChrimsonR_kv_eyfp_AAV	723.576	-463.53	221.816	no cnx
2019_08_09_exp2_TH	0	interneuron	2	207	207.586	Point 24	Tlx3	ChrimsonR_kv_eyfp_AAV	575.401	-485.82	221.816	no cnx
2019_08_09_exp2_TH	0	interneuron	2	207	207.586	Point 25	Tlx3	ChrimsonR_kv_eyfp_AAV	614.291	-548.268	221.816	no cnx
2019_08_09_exp2_TH	0	interneuron	2	207	207.586	Point 26	Tlx3	ChrimsonR_kv_eyfp_AAV	631.807	-577.156	221.816	no cnx
2019_08_09_exp2_TH	0	interneuron	2	207	207.586	Point 27	Tlx3	ChrimsonR_kv_eyfp_AAV	659.777	-723.63	221.596	no cnx
2019_08_09_exp2_TH	0	interneuron	2	207	207.586	Point 39	Tlx3	ChrimsonR_kv_eyfp_AAV	595.089	-709.353	221.886	no cnx
2019_08_09_exp2_TH	0	interneuron	2	207	207.586	Point 33	Tlx3	ChrimsonR_kv_eyfp_AAV	662.196	-702.537	221.596	no cnx
2019_08_09_exp2_TH	0	interneuron	2	207	207.586	Point 38	Tlx3	ChrimsonR_kv_eyfp_AAV	635.895	-732.839	221.886	no cnx
2019_05_29_exp2_TH	0	interneuron	2	248	612.805	Point 11	Rorb	ChrimsonR_kv_eyfp_AAV	479.268	127.362	584.195	excitatory
2019_05_29_exp2_TH	0	interneuron	2	248	612.805	Point 10	Rorb	ChrimsonR_kv_eyfp_AAV	510.529	60.5671	584.195	no cnx
2019_05_29_exp2_TH	0	interneuron	2	248	612.805	Point 13	Rorb	ChrimsonR_kv_eyfp_AAV	484.564	44.6919	575.665	no cnx
2019_05_29_exp2_TH	0	interneuron	2	248	612.805	Point 12	Rorb	ChrimsonR_kv_eyfp_AAV	574.117	209.314	575.665	no cnx
2019_05_29_exp2_TH	0	interneuron	2	248	612.805	Point 15	Rorb	ChrimsonR_kv_eyfp_AAV	543.562	66.7634	575.665	no cnx
2019_05_29_exp2_TH	0	interneuron	2	248	612.805	Point 14	Rorb	ChrimsonR_kv_eyfp_AAV	598.557	49.6227	575.665	no cnx
2019_05_29_exp2_TH	0	interneuron	2	248	612.805	Point 17	Rorb	ChrimsonR_kv_eyfp_AAV	503.125	42.8752	575.665	no cnx
2019_05_29_exp2_TH	0	interneuron	2	248	612.805	Point 16	Rorb	ChrimsonR_kv_eyfp_AAV	585.063	177.115	575.665	no cnx
2019_05_29_exp2_TH	0	interneuron	2	248	612.805	Point 19	Rorb	ChrimsonR_kv_eyfp_AAV	519.174	46.8482	575.665	no cnx
2019_05_29_exp2_TH	0	interneuron	2	248	612.805	Point 18	Rorb	ChrimsonR_kv_eyfp_AAV	508.236	-20.3662	575.665	no cnx
2019_05_29_exp2_TH	0	interneuron	2	248	612.805	Point 31	Rorb	ChrimsonR_kv_eyfp_AAV	298.283	-9.70963	601.005	excitatory
2019_05_29_exp2_TH	0	interneuron	2	248	612.805	Point 30	Rorb	ChrimsonR_kv_eyfp_AAV	292.999	-96.6338	601.005	no cnx
2019_05_29_exp2_TH	0	interneuron	2	248	612.805	Point 37	Rorb	ChrimsonR_kv_eyfp_AAV	346.775	-22.1376	601.005	no cnx
2019_05_29_exp2_TH	0	interneuron	2	248	612.805	Point 36	Rorb	ChrimsonR_kv_eyfp_AAV	341.103	190.539	601.005	no cnx
2019_05_29_exp2_TH	0	interneuron	2	248	612.805	Point 35	Rorb	ChrimsonR_kv_eyfp_AAV	317.639	-85.1493	601.005	no cnx
2019_05_29_exp2_TH	0	interneuron	2	248	612.805	Point 34	Rorb	ChrimsonR_kv_eyfp_AAV	303.74	190.586	601.005	no cnx
2019_05_29_exp2_TH	0	interneuron	2	248	612.805	Point 5	Rorb	ChrimsonR_kv_eyfp_AAV	458.56	42.167	584.195	no cnx
2019_05_29_exp2_TH	0	interneuron	2	248	612.805	Point 4	Rorb	ChrimsonR_kv_eyfp_AAV	468.691	94.0908	584.195	no cnx
2019_05_29_exp2_TH	0	interneuron	2	248	612.805	Point 7	Rorb	ChrimsonR_kv_eyfp_AAV	530.635	32.8697	584.195	no cnx
2019_05_29_exp2_TH	0	interneuron	2	248	612.805	Point 6	Rorb	ChrimsonR_kv_eyfp_AAV	460.479	217.804	584.195	no cnx
2019_05_29_exp2_TH	0	interneuron	2	248	612.805	Point 1	Rorb	ChrimsonR_kv_eyfp_AAV	485.646	71.003	584.195	no cnx
2019_05_29_exp2_TH	0	interneuron	2	248	612.805	Point 3	Rorb	ChrimsonR_kv_eyfp_AAV	451.969	269.144	584.195	no cnx
2019_05_29_exp2_TH	0	interneuron	2	248	612.805	Point 2	Rorb	ChrimsonR_kv_eyfp_AAV	500.738	172.919	584.195	no cnx
2019_05_29_exp2_TH	0	interneuron	2	248	612.805	Point 9	Rorb	ChrimsonR_kv_eyfp_AAV	509.555	139.89	584.195	no cnx
2019_05_29_exp2_TH	0	interneuron	2	248	612.805	Point 8	Rorb	ChrimsonR_kv_eyfp_AAV	493.412	96.8753	584.195	no cnx
2019_05_29_exp2_TH	0	interneuron	2	248	612.805	Point 32	Rorb	ChrimsonR_kv_eyfp_AAV	263.333	92.2134	601.005	excitatory
2019_05_29_exp2_TH	0	interneuron	2	248	612.805	Point 28	Rorb	ChrimsonR_kv_eyfp_AAV	500.826	-56.5815	567.045	no cnx
2019_05_29_exp2_TH	0	interneuron	2	248	612.805	Point 29	Rorb	ChrimsonR_kv_eyfp_AAV	473.584	277.204	567.045	no cnx
2019_05_29_exp2_TH	0	interneuron	2	248	612.805	Point 20	Rorb	ChrimsonR_kv_eyfp_AAV	462.854	205.194	575.665	no cnx
2019_05_29_exp2_TH	0	interneuron	2	248	612.805	Point 21	Rorb	ChrimsonR_kv_eyfp_AAV	596.285	74.8229	575.665	excitatory
2019_05_29_exp2_TH	0	interneuron	2	248	612.805	Point 22	Rorb	ChrimsonR_kv_eyfp_AAV	519.17	-19.6468	567.045	no cnx
2019_05_29_exp2_TH	0	interneuron	2	248	612.805	Point 23	Rorb	ChrimsonR_kv_eyfp_AAV	581.793	30.2363	567.045	no cnx
2019_05_29_exp2_TH	0	interneuron	2	248	612.805	Point 24	Rorb	ChrimsonR_kv_eyfp_AAV	469.189	-23.396	567.045	no cnx
2019_05_29_exp2_TH	0	interneuron	2	248	612.805	Point 25	Rorb	ChrimsonR_kv_eyfp_AAV	467.109	31.6356	567.045	no cnx
2019_05_29_exp2_TH	0	interneuron	2	248	612.805	Point 26	Rorb	ChrimsonR_kv_eyfp_AAV	487.843	231.277	567.045	no cnx
2019_05_29_exp2_TH	0	interneuron	2	248	612.805	Point 27	Rorb	ChrimsonR_kv_eyfp_AAV	547.914	240.398	567.045	no cnx
2019_05_29_exp2_TH	0	interneuron	2	248	612.805	Point 33	Rorb	ChrimsonR_kv_eyfp_AAV	351.851	-71.6188	601.005	no cnx
2019_04_05_exp1_TH	1	interneuron	2	224	200.385	Point 50	Rorb	ChrimsonR_kv_eyfp_AAV	495.673	265.367	165.675	no cnx
2019_04_05_exp1_TH	1	interneuron	2	224	200.385	Point 11	Rorb	ChrimsonR_kv_eyfp_AAV	555.923	59.5825	164.805	no cnx
2019_04_05_exp1_TH	1	interneuron	2	224	200.385	Point 10	Rorb	ChrimsonR_kv_eyfp_AAV	345.464	-73.9122	164.805	no cnx
2019_04_05_exp1_TH	1	interneuron	2	224	200.385	Point 13	Rorb	ChrimsonR_kv_eyfp_AAV	513.288	-27.2189	171.915	no cnx
2019_04_05_exp1_TH	1	interneuron	2	224	200.385	Point 12	Rorb	ChrimsonR_kv_eyfp_AAV	352.378	10.6422	164.805	no cnx
2019_04_05_exp1_TH	1	interneuron	2	224	200.385	Point 15	Rorb	ChrimsonR_kv_eyfp_AAV	518.367	40.1621	168.935	no cnx
2019_04_05_exp1_TH	1	interneuron	2	224	200.385	Point 14	Rorb	ChrimsonR_kv_eyfp_AAV	330.043	81.7949	168.935	no cnx
2019_04_05_exp1_TH	1	interneuron	2	224	200.385	Point 17	Rorb	ChrimsonR_kv_eyfp_AAV	510.125	215.82	168.935	no cnx
2019_04_05_exp1_TH	1	interneuron	2	224	200.385	Point 16	Rorb	ChrimsonR_kv_eyfp_AAV	348.886	145.001	168.935	no cnx
2019_04_05_exp1_TH	1	interneuron	2	224	200.385	Point 19	Rorb	ChrimsonR_kv_eyfp_AAV	410.134	122.69	168.935	no cnx
2019_04_05_exp1_TH	1	interneuron	2	224	200.385	Point 18	Rorb	ChrimsonR_kv_eyfp_AAV	412.282	152.376	168.935	no cnx
2019_04_05_exp1_TH	1	interneuron	2	224	200.385	Point 31	Rorb	ChrimsonR_kv_eyfp_AAV	528.841	101.481	187.105	no cnx
2019_04_05_exp1_TH	1	interneuron	2	224	200.385	Point 30	Rorb	ChrimsonR_kv_eyfp_AAV	539.218	-37.1285	198.945	no cnx
2019_04_05_exp1_TH	1	interneuron	2	224	200.385	Point 37	Rorb	ChrimsonR_kv_eyfp_AAV	528.565	-97.2745	175.045	no cnx
2019_04_05_exp1_TH	1	interneuron	2	224	200.385	Point 36	Rorb	ChrimsonR_kv_eyfp_AAV	536.467	99.1828	187.105	no cnx
2019_04_05_exp1_TH	1	interneuron	2	224	200.385	Point 35	Rorb	ChrimsonR_kv_eyfp_AAV	555.223	144.256	187.105	no cnx
2019_04_05_exp1_TH	1	interneuron	2	224	200.385	Point 34	Rorb	ChrimsonR_kv_eyfp_AAV	360.382	68.6492	187.105	no cnx
2019_04_05_exp1_TH	1	interneuron	2	224	200.385	Point 5	Rorb	ChrimsonR_kv_eyfp_AAV	366.268	-5.89645	174.755	no cnx
2019_04_05_exp1_TH	1	interneuron	2	224	200.385	Point 4	Rorb	ChrimsonR_kv_eyfp_AAV	344.559	-8.5866	174.755	no cnx
2019_04_05_exp1_TH	1	interneuron	2	224	200.385	Point 7	Rorb	ChrimsonR_kv_eyfp_AAV	355.93	-119.979	164.805	no cnx
2019_04_05_exp1_TH	1	interneuron	2	224	200.385	Point 6	Rorb	ChrimsonR_kv_eyfp_AAV	543.235	-22.5996	174.755	no cnx
2019_04_05_exp1_TH	1	interneuron	2	224	200.385	Point 1	Rorb	ChrimsonR_kv_eyfp_AAV	325.682	-67.0444	174.755	no cnx
2019_04_05_exp1_TH	1	interneuron	2	224	200.385	Point 3	Rorb	ChrimsonR_kv_eyfp_AAV	505.66	2.52035	174.755	no cnx
2019_04_05_exp1_TH	1	interneuron	2	224	200.385	Point 2	Rorb	ChrimsonR_kv_eyfp_AAV	380.123	71.3924	174.755	no cnx
2019_04_05_exp1_TH	1	interneuron	2	224	200.385	Point 9	Rorb	ChrimsonR_kv_eyfp_AAV	344.782	67.9168	164.805	no cnx
2019_04_05_exp1_TH	1	interneuron	2	224	200.385	Point 8	Rorb	ChrimsonR_kv_eyfp_AAV	534.487	29.5201	164.805	no cnx
2019_04_05_exp1_TH	1	interneuron	2	224	200.385	Point 32	Rorb	ChrimsonR_kv_eyfp_AAV	514.8	69.6975	187.105	no cnx
2019_04_05_exp1_TH	1	interneuron	2	224	200.385	Point 48	Rorb	ChrimsonR_kv_eyfp_AAV	383.145	157.004	165.675	no cnx
2019_04_05_exp1_TH	1	interneuron	2	224	200.385	Point 49	Rorb	ChrimsonR_kv_eyfp_AAV	545.634	224.097	165.675	no cnx
2019_04_05_exp1_TH	1	interneuron	2	224	200.385	Point 42	Rorb	ChrimsonR_kv_eyfp_AAV	523.807	44.4602	165.675	no cnx
2019_04_05_exp1_TH	1	interneuron	2	224	200.385	Point 43	Rorb	ChrimsonR_kv_eyfp_AAV	526.857	124.874	165.675	no cnx
2019_04_05_exp1_TH	1	interneuron	2	224	200.385	Point 40	Rorb	ChrimsonR_kv_eyfp_AAV	482.621	98.0251	175.045	no cnx
2019_04_05_exp1_TH	1	interneuron	2	224	200.385	Point 41	Rorb	ChrimsonR_kv_eyfp_AAV	575.023	112.242	175.045	no cnx
2019_04_05_exp1_TH	1	interneuron	2	224	200.385	Point 46	Rorb	ChrimsonR_kv_eyfp_AAV	511.791	156.174	165.675	no cnx
2019_04_05_exp1_TH	1	interneuron	2	224	200.385	Point 47	Rorb	ChrimsonR_kv_eyfp_AAV	504.571	240.976	165.675	no cnx
2019_04_05_exp1_TH	1	interneuron	2	224	200.385	Point 44	Rorb	ChrimsonR_kv_eyfp_AAV	576.875	188.799	165.675	no cnx
2019_04_05_exp1_TH	1	interneuron	2	224	200.385	Point 45	Rorb	ChrimsonR_kv_eyfp_AAV	536.314	113.733	165.675	no cnx
2019_04_05_exp1_TH	1	interneuron	2	224	200.385	Point 28	Rorb	ChrimsonR_kv_eyfp_AAV	549.6	45.4678	198.945	no cnx
2019_04_05_exp1_TH	1	interneuron	2	224	200.385	Point 29	Rorb	ChrimsonR_kv_eyfp_AAV	503.193	30.8431	198.945	no cnx
2019_04_05_exp1_TH	1	interneuron	2	224	200.385	Point 20	Rorb	ChrimsonR_kv_eyfp_AAV	414.412	92.3115	171.915	no cnx
2019_04_05_exp1_TH	1	interneuron	2	224	200.385	Point 21	Rorb	ChrimsonR_kv_eyfp_AAV	379.408	9.04719	171.915	no cnx
2019_04_05_exp1_TH	1	interneuron	2	224	200.385	Point 22	Rorb	ChrimsonR_kv_eyfp_AAV	501.263	154.723	171.915	no cnx
2019_04_05_exp1_TH	1	interneuron	2	224	200.385	Point 23	Rorb	ChrimsonR_kv_eyfp_AAV	522.416	206.149	171.915	no cnx
2019_04_05_exp1_TH	1	interneuron	2	224	200.385	Point 24	Rorb	ChrimsonR_kv_eyfp_AAV	485.352	140.306	198.945	no cnx
2019_04_05_exp1_TH	1	interneuron	2	224	200.385	Point 25	Rorb	ChrimsonR_kv_eyfp_AAV	549.394	29.2979	198.945	no cnx
2019_04_05_exp1_TH	1	interneuron	2	224	200.385	Point 26	Rorb	ChrimsonR_kv_eyfp_AAV	607.05	14.2574	198.945	no cnx
2019_04_05_exp1_TH	1	interneuron	2	224	200.385	Point 27	Rorb	ChrimsonR_kv_eyfp_AAV	501.326	117.232	198.945	no cnx
2019_04_05_exp1_TH	1	interneuron	2	224	200.385	Point 39	Rorb	ChrimsonR_kv_eyfp_AAV	583.415	123.583	175.045	no cnx
2019_04_05_exp1_TH	1	interneuron	2	224	200.385	Point 33	Rorb	ChrimsonR_kv_eyfp_AAV	499.709	-104.611	187.105	no cnx
2019_04_05_exp1_TH	1	interneuron	2	224	200.385	Point 38	Rorb	ChrimsonR_kv_eyfp_AAV	549.601	70.1532	175.045	no cnx
2019_03_20_exp1_TH	1	interneuron	2	138	18.9249	Point 51	Rorb	ChrimsonR_kv_eyfp_AAV	382.36	-54.114	22.805	no cnx
2019_03_20_exp1_TH	1	interneuron	2	138	18.9249	Point 50	Rorb	ChrimsonR_kv_eyfp_AAV	381.321	185.067	22.805	no cnx
2019_03_20_exp1_TH	1	interneuron	2	138	18.9249	Point 53	Rorb	ChrimsonR_kv_eyfp_AAV	358.612	71.7306	22.805	no cnx
2019_03_20_exp1_TH	1	interneuron	2	138	18.9249	Point 52	Rorb	ChrimsonR_kv_eyfp_AAV	200.493	64.7044	22.805	no cnx
2019_03_20_exp1_TH	1	interneuron	2	138	18.9249	Point 11	Rorb	ChrimsonR_kv_eyfp_AAV	243.982	-48.7859	34.585	no cnx
2019_03_20_exp1_TH	1	interneuron	2	138	18.9249	Point 10	Rorb	ChrimsonR_kv_eyfp_AAV	388.9	-40.0981	34.585	excitatory
2019_03_20_exp1_TH	1	interneuron	2	138	18.9249	Point 13	Rorb	ChrimsonR_kv_eyfp_AAV	241.092	35.4589	34.585	no cnx
2019_03_20_exp1_TH	1	interneuron	2	138	18.9249	Point 12	Rorb	ChrimsonR_kv_eyfp_AAV	319.905	-0.248055	34.585	excitatory
2019_03_20_exp1_TH	1	interneuron	2	138	18.9249	Point 15	Rorb	ChrimsonR_kv_eyfp_AAV	275.118	78.1615	34.585	no cnx
2019_03_20_exp1_TH	1	interneuron	2	138	18.9249	Point 14	Rorb	ChrimsonR_kv_eyfp_AAV	369.484	69.386	34.585	excitatory
2019_03_20_exp1_TH	1	interneuron	2	138	18.9249	Point 17	Rorb	ChrimsonR_kv_eyfp_AAV	251.749	-12.4362	34.585	excitatory
2019_03_20_exp1_TH	1	interneuron	2	138	18.9249	Point 16	Rorb	ChrimsonR_kv_eyfp_AAV	439.337	-15.1619	34.585	no cnx
2019_03_20_exp1_TH	1	interneuron	2	138	18.9249	Point 19	Rorb	ChrimsonR_kv_eyfp_AAV	270.342	-75.403	37.675	no cnx
2019_03_20_exp1_TH	1	interneuron	2	138	18.9249	Point 18	Rorb	ChrimsonR_kv_eyfp_AAV	390.119	-1.75363	34.585	no cnx
2019_03_20_exp1_TH	1	interneuron	2	138	18.9249	Point 31	Rorb	ChrimsonR_kv_eyfp_AAV	207.805	70.9957	25.795	no cnx
2019_03_20_exp1_TH	1	interneuron	2	138	18.9249	Point 30	Rorb	ChrimsonR_kv_eyfp_AAV	340.906	100.392	25.795	no cnx
2019_03_20_exp1_TH	1	interneuron	2	138	18.9249	Point 37	Rorb	ChrimsonR_kv_eyfp_AAV	363.591	-83.4747	27.295	no cnx
2019_03_20_exp1_TH	1	interneuron	2	138	18.9249	Point 36	Rorb	ChrimsonR_kv_eyfp_AAV	229.876	95.1849	27.295	no cnx
2019_03_20_exp1_TH	1	interneuron	2	138	18.9249	Point 35	Rorb	ChrimsonR_kv_eyfp_AAV	439.832	96.9394	27.295	no cnx
2019_03_20_exp1_TH	1	interneuron	2	138	18.9249	Point 34	Rorb	ChrimsonR_kv_eyfp_AAV	323.319	40.9088	27.295	no cnx
2019_03_20_exp1_TH	1	interneuron	2	138	18.9249	Point 5	Rorb	ChrimsonR_kv_eyfp_AAV	279.829	64.5594	34.585	no cnx
2019_03_20_exp1_TH	1	interneuron	2	138	18.9249	Point 4	Rorb	ChrimsonR_kv_eyfp_AAV	229.717	-70.9321	34.585	no cnx
2019_03_20_exp1_TH	1	interneuron	2	138	18.9249	Point 7	Rorb	ChrimsonR_kv_eyfp_AAV	214.949	87.2254	34.585	no cnx
2019_03_20_exp1_TH	1	interneuron	2	138	18.9249	Point 6	Rorb	ChrimsonR_kv_eyfp_AAV	213.965	103.374	34.585	no cnx
2019_03_20_exp1_TH	1	interneuron	2	138	18.9249	Point 1	Rorb	ChrimsonR_kv_eyfp_AAV	200.354	49.8578	34.585	no cnx
2019_03_20_exp1_TH	1	interneuron	2	138	18.9249	Point 3	Rorb	ChrimsonR_kv_eyfp_AAV	325.75	-83.4793	34.585	no cnx
2019_03_20_exp1_TH	1	interneuron	2	138	18.9249	Point 2	Rorb	ChrimsonR_kv_eyfp_AAV	281.173	-37.0557	34.585	no cnx
2019_03_20_exp1_TH	1	interneuron	2	138	18.9249	Point 9	Rorb	ChrimsonR_kv_eyfp_AAV	328.723	89.4222	34.585	no cnx
2019_03_20_exp1_TH	1	interneuron	2	138	18.9249	Point 8	Rorb	ChrimsonR_kv_eyfp_AAV	266.928	97.8351	34.585	no cnx
2019_03_20_exp1_TH	1	interneuron	2	138	18.9249	Point 32	Rorb	ChrimsonR_kv_eyfp_AAV	395.451	-34.515	25.795	no cnx
2019_03_20_exp1_TH	1	interneuron	2	138	18.9249	Point 48	Rorb	ChrimsonR_kv_eyfp_AAV	264.007	-40.4708	22.805	no cnx
2019_03_20_exp1_TH	1	interneuron	2	138	18.9249	Point 49	Rorb	ChrimsonR_kv_eyfp_AAV	364.871	13.2885	22.805	no cnx
2019_03_20_exp1_TH	1	interneuron	2	138	18.9249	Point 42	Rorb	ChrimsonR_kv_eyfp_AAV	294.451	24.3423	27.295	no cnx
2019_03_20_exp1_TH	1	interneuron	2	138	18.9249	Point 43	Rorb	ChrimsonR_kv_eyfp_AAV	220.315	-73.4554	27.295	no cnx
2019_03_20_exp1_TH	1	interneuron	2	138	18.9249	Point 40	Rorb	ChrimsonR_kv_eyfp_AAV	252.87	122.128	27.295	no cnx
2019_03_20_exp1_TH	1	interneuron	2	138	18.9249	Point 41	Rorb	ChrimsonR_kv_eyfp_AAV	213.407	92.3971	27.295	no cnx
2019_03_20_exp1_TH	1	interneuron	2	138	18.9249	Point 46	Rorb	ChrimsonR_kv_eyfp_AAV	359.733	96.0766	27.295	excitatory
2019_03_20_exp1_TH	1	interneuron	2	138	18.9249	Point 47	Rorb	ChrimsonR_kv_eyfp_AAV	178.009	123.197	22.805	no cnx
2019_03_20_exp1_TH	1	interneuron	2	138	18.9249	Point 44	Rorb	ChrimsonR_kv_eyfp_AAV	319.016	-55.7203	27.295	no cnx
2019_03_20_exp1_TH	1	interneuron	2	138	18.9249	Point 45	Rorb	ChrimsonR_kv_eyfp_AAV	396.858	-68.7786	27.295	excitatory
2019_03_20_exp1_TH	1	interneuron	2	138	18.9249	Point 28	Rorb	ChrimsonR_kv_eyfp_AAV	374.637	45.865	25.795	no cnx
2019_03_20_exp1_TH	1	interneuron	2	138	18.9249	Point 29	Rorb	ChrimsonR_kv_eyfp_AAV	261.907	160.754	25.795	no cnx
2019_03_20_exp1_TH	1	interneuron	2	138	18.9249	Point 20	Rorb	ChrimsonR_kv_eyfp_AAV	354.952	-17.2467	37.675	no cnx
2019_03_20_exp1_TH	1	interneuron	2	138	18.9249	Point 21	Rorb	ChrimsonR_kv_eyfp_AAV	402.128	-47.7912	37.675	no cnx
2019_03_20_exp1_TH	1	interneuron	2	138	18.9249	Point 22	Rorb	ChrimsonR_kv_eyfp_AAV	243.697	154.811	37.675	no cnx
2019_03_20_exp1_TH	1	interneuron	2	138	18.9249	Point 23	Rorb	ChrimsonR_kv_eyfp_AAV	265.252	-65.9301	37.675	no cnx
2019_03_20_exp1_TH	1	interneuron	2	138	18.9249	Point 24	Rorb	ChrimsonR_kv_eyfp_AAV	418.138	4.38067	37.685	no cnx
2019_03_20_exp1_TH	1	interneuron	2	138	18.9249	Point 25	Rorb	ChrimsonR_kv_eyfp_AAV	265.837	37.44	37.685	no cnx
2019_03_20_exp1_TH	1	interneuron	2	138	18.9249	Point 26	Rorb	ChrimsonR_kv_eyfp_AAV	207.765	5.14308	25.795	no cnx
2019_03_20_exp1_TH	1	interneuron	2	138	18.9249	Point 27	Rorb	ChrimsonR_kv_eyfp_AAV	256.126	25.6258	25.795	no cnx
2019_03_20_exp1_TH	1	interneuron	2	138	18.9249	Point 33	Rorb	ChrimsonR_kv_eyfp_AAV	234.654	53.1072	27.295	no cnx
2019_03_20_exp1_TH	1	interneuron	2	138	18.9249	Point 38	Rorb	ChrimsonR_kv_eyfp_AAV	251.209	38.7833	27.295	no cnx
2019_02_28_exp1_TH	1	interneuron	2	209	292.019	Point 11	Tlx3	ChrimsonR_kv_eyfp_AAV	530.862	-54.9789	320.139	no cnx
2019_02_28_exp1_TH	1	interneuron	2	209	292.019	Point 10	Tlx3	ChrimsonR_kv_eyfp_AAV	507.569	102.056	329.809	no cnx
2019_02_28_exp1_TH	1	interneuron	2	209	292.019	Point 13	Tlx3	ChrimsonR_kv_eyfp_AAV	520.454	25.1235	320.139	no cnx
2019_02_28_exp1_TH	1	interneuron	2	209	292.019	Point 12	Tlx3	ChrimsonR_kv_eyfp_AAV	622.149	37.0371	320.139	excitatory
2019_02_28_exp1_TH	1	interneuron	2	209	292.019	Point 15	Tlx3	ChrimsonR_kv_eyfp_AAV	524.675	116.765	320.139	no cnx
2019_02_28_exp1_TH	1	interneuron	2	209	292.019	Point 14	Tlx3	ChrimsonR_kv_eyfp_AAV	475.614	40.2496	320.139	no cnx
2019_02_28_exp1_TH	1	interneuron	2	209	292.019	Point 17	Tlx3	ChrimsonR_kv_eyfp_AAV	505.508	62.8324	322.519	no cnx
2019_02_28_exp1_TH	1	interneuron	2	209	292.019	Point 16	Tlx3	ChrimsonR_kv_eyfp_AAV	677.766	46.1584	320.139	no cnx
2019_02_28_exp1_TH	1	interneuron	2	209	292.019	Point 19	Tlx3	ChrimsonR_kv_eyfp_AAV	522.2	146.262	322.519	no cnx
2019_02_28_exp1_TH	1	interneuron	2	209	292.019	Point 18	Tlx3	ChrimsonR_kv_eyfp_AAV	572.465	30.9367	322.519	no cnx
2019_02_28_exp1_TH	1	interneuron	2	209	292.019	Point 31	Tlx3	ChrimsonR_kv_eyfp_AAV	545.64	140.115	312.419	no cnx
2019_02_28_exp1_TH	1	interneuron	2	209	292.019	Point 30	Tlx3	ChrimsonR_kv_eyfp_AAV	490.458	104.112	312.419	no cnx
2019_02_28_exp1_TH	1	interneuron	2	209	292.019	Point 37	Tlx3	ChrimsonR_kv_eyfp_AAV	460.168	49.0171	301.389	no cnx
2019_02_28_exp1_TH	1	interneuron	2	209	292.019	Point 36	Tlx3	ChrimsonR_kv_eyfp_AAV	466.659	-22.69	301.389	excitatory
2019_02_28_exp1_TH	1	interneuron	2	209	292.019	Point 35	Tlx3	ChrimsonR_kv_eyfp_AAV	456.451	130.379	314.899	no cnx
2019_02_28_exp1_TH	1	interneuron	2	209	292.019	Point 34	Tlx3	ChrimsonR_kv_eyfp_AAV	551.691	124.614	314.899	no cnx
2019_02_28_exp1_TH	1	interneuron	2	209	292.019	Point 5	Tlx3	ChrimsonR_kv_eyfp_AAV	476.713	-39.0974	327.749	no cnx
2019_02_28_exp1_TH	1	interneuron	2	209	292.019	Point 4	Tlx3	ChrimsonR_kv_eyfp_AAV	536.202	120.176	327.749	no cnx
2019_02_28_exp1_TH	1	interneuron	2	209	292.019	Point 7	Tlx3	ChrimsonR_kv_eyfp_AAV	540.828	-14.7844	329.809	no cnx
2019_02_28_exp1_TH	1	interneuron	2	209	292.019	Point 6	Tlx3	ChrimsonR_kv_eyfp_AAV	584.175	61.2088	327.749	no cnx
2019_02_28_exp1_TH	1	interneuron	2	209	292.019	Point 1	Tlx3	ChrimsonR_kv_eyfp_AAV	465.053	21.196	327.749	no cnx
2019_02_28_exp1_TH	1	interneuron	2	209	292.019	Point 3	Tlx3	ChrimsonR_kv_eyfp_AAV	480.756	-6.18607	327.749	no cnx
2019_02_28_exp1_TH	1	interneuron	2	209	292.019	Point 2	Tlx3	ChrimsonR_kv_eyfp_AAV	560.264	93.8207	327.749	no cnx
2019_02_28_exp1_TH	1	interneuron	2	209	292.019	Point 9	Tlx3	ChrimsonR_kv_eyfp_AAV	544.989	49.3409	329.809	no cnx
2019_02_28_exp1_TH	1	interneuron	2	209	292.019	Point 8	Tlx3	ChrimsonR_kv_eyfp_AAV	500.068	-4.88835	329.809	no cnx
2019_02_28_exp1_TH	1	interneuron	2	209	292.019	Point 32	Tlx3	ChrimsonR_kv_eyfp_AAV	475.342	63.8579	312.419	no cnx
2019_02_28_exp1_TH	1	interneuron	2	209	292.019	Point 42	Tlx3	ChrimsonR_kv_eyfp_AAV	465.927	243.144	361.679	no cnx
2019_02_28_exp1_TH	1	interneuron	2	209	292.019	Point 43	Tlx3	ChrimsonR_kv_eyfp_AAV	470.306	317.386	361.679	no cnx
2019_02_28_exp1_TH	1	interneuron	2	209	292.019	Point 40	Tlx3	ChrimsonR_kv_eyfp_AAV	561.525	17.1909	301.389	no cnx
2019_02_28_exp1_TH	1	interneuron	2	209	292.019	Point 41	Tlx3	ChrimsonR_kv_eyfp_AAV	661.735	59.8696	301.389	no cnx
2019_02_28_exp1_TH	1	interneuron	2	209	292.019	Point 44	Tlx3	ChrimsonR_kv_eyfp_AAV	511.395	405.479	361.679	no cnx
2019_02_28_exp1_TH	1	interneuron	2	209	292.019	Point 45	Tlx3	ChrimsonR_kv_eyfp_AAV	460.587	384.75	361.679	no cnx
2019_02_28_exp1_TH	1	interneuron	2	209	292.019	Point 28	Tlx3	ChrimsonR_kv_eyfp_AAV	671.539	-40.427	312.419	no cnx
2019_02_28_exp1_TH	1	interneuron	2	209	292.019	Point 29	Tlx3	ChrimsonR_kv_eyfp_AAV	465.83	-59.3807	312.419	no cnx
2019_02_28_exp1_TH	1	interneuron	2	209	292.019	Point 20	Tlx3	ChrimsonR_kv_eyfp_AAV	498.418	176.582	322.519	no cnx
2019_02_28_exp1_TH	1	interneuron	2	209	292.019	Point 21	Tlx3	ChrimsonR_kv_eyfp_AAV	622.63	49.8489	312.419	excitatory
2019_02_28_exp1_TH	1	interneuron	2	209	292.019	Point 22	Tlx3	ChrimsonR_kv_eyfp_AAV	504.906	-32.2318	312.419	no cnx
2019_02_28_exp1_TH	1	interneuron	2	209	292.019	Point 23	Tlx3	ChrimsonR_kv_eyfp_AAV	528.95	154.686	312.419	no cnx
2019_02_28_exp1_TH	1	interneuron	2	209	292.019	Point 24	Tlx3	ChrimsonR_kv_eyfp_AAV	617.794	-32.1253	312.419	no cnx
2019_02_28_exp1_TH	1	interneuron	2	209	292.019	Point 25	Tlx3	ChrimsonR_kv_eyfp_AAV	524.39	-27.5471	312.419	no cnx
2019_02_28_exp1_TH	1	interneuron	2	209	292.019	Point 26	Tlx3	ChrimsonR_kv_eyfp_AAV	522.311	54.7244	312.419	no cnx
2019_02_28_exp1_TH	1	interneuron	2	209	292.019	Point 27	Tlx3	ChrimsonR_kv_eyfp_AAV	622.581	59.5855	312.419	excitatory
2019_02_28_exp1_TH	1	interneuron	2	209	292.019	Point 39	Tlx3	ChrimsonR_kv_eyfp_AAV	458.131	159.837	301.389	no cnx
2019_02_28_exp1_TH	1	interneuron	2	209	292.019	Point 33	Tlx3	ChrimsonR_kv_eyfp_AAV	494.345	126.941	314.899	excitatory
2019_02_28_exp1_TH	1	interneuron	2	209	292.019	Point 38	Tlx3	ChrimsonR_kv_eyfp_AAV	444.332	102.608	301.389	no cnx
2019_02_15_exp1_TH	1	interneuron	2	231	656.916	Point 11	Tlx3	ChrimsonR_kv_eyfp_AAV	476.157	272.352	657.416	no cnx
2019_02_15_exp1_TH	1	interneuron	2	231	656.916	Point 10	Tlx3	ChrimsonR_kv_eyfp_AAV	648.256	261.382	657.416	no cnx
2019_02_15_exp1_TH	1	interneuron	2	231	656.916	Point 13	Tlx3	ChrimsonR_kv_eyfp_AAV	566.612	154.129	657.416	no cnx
2019_02_15_exp1_TH	1	interneuron	2	231	656.916	Point 12	Tlx3	ChrimsonR_kv_eyfp_AAV	585.735	263.651	657.416	no cnx
2019_02_15_exp1_TH	1	interneuron	2	231	656.916	Point 15	Tlx3	ChrimsonR_kv_eyfp_AAV	554.821	170.893	655.596	no cnx
2019_02_15_exp1_TH	1	interneuron	2	231	656.916	Point 14	Tlx3	ChrimsonR_kv_eyfp_AAV	584.648	47.9819	655.596	no cnx
2019_02_15_exp1_TH	1	interneuron	2	231	656.916	Point 17	Tlx3	ChrimsonR_kv_eyfp_AAV	507.695	235.998	655.596	no cnx
2019_02_15_exp1_TH	1	interneuron	2	231	656.916	Point 16	Tlx3	ChrimsonR_kv_eyfp_AAV	571.296	77.0047	655.596	no cnx
2019_02_15_exp1_TH	1	interneuron	2	231	656.916	Point 19	Tlx3	ChrimsonR_kv_eyfp_AAV	590.803	93.7378	660.706	no cnx
2019_02_15_exp1_TH	1	interneuron	2	231	656.916	Point 18	Tlx3	ChrimsonR_kv_eyfp_AAV	527.037	118.501	660.706	no cnx
2019_02_15_exp1_TH	1	interneuron	2	231	656.916	Point 31	Tlx3	ChrimsonR_kv_eyfp_AAV	502.553	198.913	653.036	no cnx
2019_02_15_exp1_TH	1	interneuron	2	231	656.916	Point 30	Tlx3	ChrimsonR_kv_eyfp_AAV	415.817	203.02	653.036	no cnx
2019_02_15_exp1_TH	1	interneuron	2	231	656.916	Point 5	Tlx3	ChrimsonR_kv_eyfp_AAV	465.153	195.093	652.626	no cnx
2019_02_15_exp1_TH	1	interneuron	2	231	656.916	Point 4	Tlx3	ChrimsonR_kv_eyfp_AAV	589.967	219.352	652.626	no cnx
2019_02_15_exp1_TH	1	interneuron	2	231	656.916	Point 7	Tlx3	ChrimsonR_kv_eyfp_AAV	518.377	33.2649	657.416	no cnx
2019_02_15_exp1_TH	1	interneuron	2	231	656.916	Point 6	Tlx3	ChrimsonR_kv_eyfp_AAV	532.711	103.292	652.626	no cnx
2019_02_15_exp1_TH	1	interneuron	2	231	656.916	Point 1	Tlx3	ChrimsonR_kv_eyfp_AAV	589.317	3.75842	652.626	no cnx
2019_02_15_exp1_TH	1	interneuron	2	231	656.916	Point 3	Tlx3	ChrimsonR_kv_eyfp_AAV	490.73	217.293	652.626	no cnx
2019_02_15_exp1_TH	1	interneuron	2	231	656.916	Point 2	Tlx3	ChrimsonR_kv_eyfp_AAV	518.452	156.36	652.626	no cnx
2019_02_15_exp1_TH	1	interneuron	2	231	656.916	Point 9	Tlx3	ChrimsonR_kv_eyfp_AAV	482.497	160.376	657.416	no cnx
2019_02_15_exp1_TH	1	interneuron	2	231	656.916	Point 8	Tlx3	ChrimsonR_kv_eyfp_AAV	467.927	249.622	657.416	no cnx
2019_02_15_exp1_TH	1	interneuron	2	231	656.916	Point 29	Tlx3	ChrimsonR_kv_eyfp_AAV	485.631	143.937	653.036	no cnx
2019_02_15_exp1_TH	1	interneuron	2	231	656.916	Point 20	Tlx3	ChrimsonR_kv_eyfp_AAV	455.617	168.762	660.706	no cnx
2019_02_15_exp1_TH	1	interneuron	2	231	656.916	Point 21	Tlx3	ChrimsonR_kv_eyfp_AAV	578.04	230.958	660.706	no cnx
2019_02_15_exp1_TH	1	interneuron	2	231	656.916	Point 22	Tlx3	ChrimsonR_kv_eyfp_AAV	480.083	174.618	653.036	no cnx
2019_02_15_exp1_TH	1	interneuron	2	231	656.916	Point 23	Tlx3	ChrimsonR_kv_eyfp_AAV	574.849	118.516	653.036	no cnx
2019_02_15_exp1_TH	1	interneuron	2	231	656.916	Point 24	Tlx3	ChrimsonR_kv_eyfp_AAV	521.085	263.232	653.036	no cnx
2019_02_15_exp1_TH	1	interneuron	2	231	656.916	Point 25	Tlx3	ChrimsonR_kv_eyfp_AAV	506.125	186.945	653.036	no cnx
2019_02_15_exp1_TH	1	interneuron	2	231	656.916	Point 26	Tlx3	ChrimsonR_kv_eyfp_AAV	447.224	246.489	653.036	no cnx
2019_02_15_exp1_TH	1	interneuron	2	231	656.916	Point 27	Tlx3	ChrimsonR_kv_eyfp_AAV	540.654	231.436	653.036	no cnx
2019_01_24_exp1_TH	0	interneuron	2	266	463.217	Point 50	Rorb	Ai167	302.026	80.6667	468.826	no cnx
2019_01_24_exp1_TH	0	interneuron	2	266	463.217	Point 11	Rorb	Ai167	461.733	166.362	437.746	no cnx
2019_01_24_exp1_TH	0	interneuron	2	266	463.217	Point 10	Rorb	Ai167	525.528	6.52969	437.746	no cnx
2019_01_24_exp1_TH	0	interneuron	2	266	463.217	Point 13	Rorb	Ai167	332.409	52.6243	437.756	no cnx
2019_01_24_exp1_TH	0	interneuron	2	266	463.217	Point 12	Rorb	Ai167	499.744	-17.7929	437.746	no cnx
2019_01_24_exp1_TH	0	interneuron	2	266	463.217	Point 15	Rorb	Ai167	594.627	218.944	488.766	no cnx
2019_01_24_exp1_TH	0	interneuron	2	266	463.217	Point 14	Rorb	Ai167	419.065	162.13	410.576	no cnx
2019_01_24_exp1_TH	0	interneuron	2	266	463.217	Point 17	Rorb	Ai167	705.509	-6.49121	481.066	no cnx
2019_01_24_exp1_TH	0	interneuron	2	266	463.217	Point 16	Rorb	Ai167	466.485	-69.6611	481.066	no cnx
2019_01_24_exp1_TH	0	interneuron	2	266	463.217	Point 19	Rorb	Ai167	451.249	29.8244	476.576	no cnx
2019_01_24_exp1_TH	0	interneuron	2	266	463.217	Point 18	Rorb	Ai167	498.506	-48.1313	481.066	no cnx
2019_01_24_exp1_TH	0	interneuron	2	266	463.217	Point 31	Rorb	Ai167	590.779	237.521	473.916	no cnx
2019_01_24_exp1_TH	0	interneuron	2	266	463.217	Point 30	Rorb	Ai167	464.6	267.961	473.916	no cnx
2019_01_24_exp1_TH	0	interneuron	2	266	463.217	Point 37	Rorb	Ai167	596.538	78.2638	425.726	no cnx
2019_01_24_exp1_TH	0	interneuron	2	266	463.217	Point 36	Rorb	Ai167	623.57	34.1394	425.726	no cnx
2019_01_24_exp1_TH	0	interneuron	2	266	463.217	Point 35	Rorb	Ai167	622.585	160.291	487.386	no cnx
2019_01_24_exp1_TH	0	interneuron	2	266	463.217	Point 34	Rorb	Ai167	470.853	353.301	473.916	no cnx
2019_01_24_exp1_TH	0	interneuron	2	266	463.217	Point 5	Rorb	Ai167	385.654	88.8049	459.056	excitatory
2019_01_24_exp1_TH	0	interneuron	2	266	463.217	Point 4	Rorb	Ai167	416.91	178.937	466.796	no cnx
2019_01_24_exp1_TH	0	interneuron	2	266	463.217	Point 7	Rorb	Ai167	488.979	124.245	459.056	no cnx
2019_01_24_exp1_TH	0	interneuron	2	266	463.217	Point 6	Rorb	Ai167	425.097	32.6696	459.056	no cnx
2019_01_24_exp1_TH	0	interneuron	2	266	463.217	Point 1	Rorb	Ai167	439.407	231.672	481.636	no cnx
2019_01_24_exp1_TH	0	interneuron	2	266	463.217	Point 3	Rorb	Ai167	462.149	27.0005	466.796	no cnx
2019_01_24_exp1_TH	0	interneuron	2	266	463.217	Point 2	Rorb	Ai167	414.322	-33.2483	466.796	no cnx
2019_01_24_exp1_TH	0	interneuron	2	266	463.217	Point 9	Rorb	Ai167	429.268	-29.3022	437.746	no cnx
2019_01_24_exp1_TH	0	interneuron	2	266	463.217	Point 8	Rorb	Ai167	321.666	83.657	453.286	no cnx
2019_01_24_exp1_TH	0	interneuron	2	266	463.217	Point 32	Rorb	Ai167	427.627	311.353	473.916	no cnx
2019_01_24_exp1_TH	0	interneuron	2	266	463.217	Point 48	Rorb	Ai167	381.115	409.841	452.346	no cnx
2019_01_24_exp1_TH	0	interneuron	2	266	463.217	Point 49	Rorb	Ai167	429.817	477.31	452.346	excitatory
2019_01_24_exp1_TH	0	interneuron	2	266	463.217	Point 42	Rorb	Ai167	354.476	299.118	483.016	no cnx
2019_01_24_exp1_TH	0	interneuron	2	266	463.217	Point 43	Rorb	Ai167	420.692	366.895	483.016	excitatory
2019_01_24_exp1_TH	0	interneuron	2	266	463.217	Point 40	Rorb	Ai167	402.049	258.442	467.606	no cnx
2019_01_24_exp1_TH	0	interneuron	2	266	463.217	Point 41	Rorb	Ai167	392.132	304.808	467.606	no cnx
2019_01_24_exp1_TH	0	interneuron	2	266	463.217	Point 46	Rorb	Ai167	430.03	450.159	452.346	no cnx
2019_01_24_exp1_TH	0	interneuron	2	266	463.217	Point 47	Rorb	Ai167	335.687	413.344	452.346	no cnx
2019_01_24_exp1_TH	0	interneuron	2	266	463.217	Point 44	Rorb	Ai167	318.178	332.249	483.016	no cnx
2019_01_24_exp1_TH	0	interneuron	2	266	463.217	Point 45	Rorb	Ai167	424.523	412.962	483.016	no cnx
2019_01_24_exp1_TH	0	interneuron	2	266	463.217	Point 28	Rorb	Ai167	563.861	40.5653	437.646	no cnx
2019_01_24_exp1_TH	0	interneuron	2	266	463.217	Point 29	Rorb	Ai167	582.77	280.193	473.916	no cnx
2019_01_24_exp1_TH	0	interneuron	2	266	463.217	Point 20	Rorb	Ai167	686.071	33.1984	476.576	no cnx
2019_01_24_exp1_TH	0	interneuron	2	266	463.217	Point 21	Rorb	Ai167	381.765	-72.9754	477.096	no cnx
2019_01_24_exp1_TH	0	interneuron	2	266	463.217	Point 22	Rorb	Ai167	380.263	-28.2058	477.096	no cnx
2019_01_24_exp1_TH	0	interneuron	2	266	463.217	Point 23	Rorb	Ai167	435.559	-262.308	461.616	no cnx
2019_01_24_exp1_TH	0	interneuron	2	266	463.217	Point 24	Rorb	Ai167	456.714	-175.384	461.616	no cnx
2019_01_24_exp1_TH	0	interneuron	2	266	463.217	Point 25	Rorb	Ai167	439.575	-283.866	448.956	no cnx
2019_01_24_exp1_TH	0	interneuron	2	266	463.217	Point 26	Rorb	Ai167	451.486	-178.11	448.956	no cnx
2019_01_24_exp1_TH	0	interneuron	2	266	463.217	Point 27	Rorb	Ai167	502.59	50.1697	437.646	no cnx
2019_01_24_exp1_TH	0	interneuron	2	266	463.217	Point 39	Rorb	Ai167	374.873	259.484	425.736	no cnx
2019_01_24_exp1_TH	0	interneuron	2	266	463.217	Point 33	Rorb	Ai167	650.002	301.146	473.916	no cnx
2019_01_24_exp1_TH	0	interneuron	2	266	463.217	Point 38	Rorb	Ai167	410.029	163.788	425.736	no cnx
2018_11_30_exp2_TH	2	interneuron	2	185	743.596	Point 11	Rorb	Ai167	470.944	205.739	730.776	no cnx
2018_11_30_exp2_TH	2	interneuron	2	185	743.596	Point 10	Rorb	Ai167	411.825	228.081	730.776	no cnx
2018_11_30_exp2_TH	2	interneuron	2	185	743.596	Point 12	Rorb	Ai167	277.911	230.14	730.776	no cnx
2018_11_30_exp2_TH	2	interneuron	2	185	743.596	Point 17	Rorb	Ai167	517.902	-69.0656	790.896	no cnx
2018_11_30_exp2_TH	2	interneuron	2	185	743.596	Point 16	Rorb	Ai167	403.499	-45.7871	790.896	excitatory
2018_11_30_exp2_TH	2	interneuron	2	185	743.596	Point 19	Rorb	Ai167	475.968	-90.5923	790.896	no cnx
2018_11_30_exp2_TH	2	interneuron	2	185	743.596	Point 18	Rorb	Ai167	609.508	48.6478	790.896	no cnx
2018_11_30_exp2_TH	2	interneuron	2	185	743.596	Point 31	Rorb	Ai167	270.467	-14.2685	758.806	no cnx
2018_11_30_exp2_TH	2	interneuron	2	185	743.596	Point 35	Rorb	Ai167	285.43	-157.955	758.806	no cnx
2018_11_30_exp2_TH	2	interneuron	2	185	743.596	Point 34	Rorb	Ai167	416.507	92.1951	758.806	no cnx
2018_11_30_exp2_TH	2	interneuron	2	185	743.596	Point 5	Rorb	Ai167	425.298	98.5449	748.496	excitatory
2018_11_30_exp2_TH	2	interneuron	2	185	743.596	Point 4	Rorb	Ai167	438.359	261.764	745.406	no cnx
2018_11_30_exp2_TH	2	interneuron	2	185	743.596	Point 7	Rorb	Ai167	290.444	120.529	739.646	no cnx
2018_11_30_exp2_TH	2	interneuron	2	185	743.596	Point 6	Rorb	Ai167	440.795	102.449	739.646	no cnx
2018_11_30_exp2_TH	2	interneuron	2	185	743.596	Point 1	Rorb	Ai167	308.974	271.046	769.256	no cnx
2018_11_30_exp2_TH	2	interneuron	2	185	743.596	Point 3	Rorb	Ai167	257.578	85.7595	753.266	no cnx
2018_11_30_exp2_TH	2	interneuron	2	185	743.596	Point 2	Rorb	Ai167	418.017	158.354	769.256	no cnx
2018_11_30_exp2_TH	2	interneuron	2	185	743.596	Point 9	Rorb	Ai167	291.869	46.5768	739.646	no cnx
2018_11_30_exp2_TH	2	interneuron	2	185	743.596	Point 8	Rorb	Ai167	436.175	261.585	739.646	no cnx
2018_11_30_exp2_TH	2	interneuron	2	185	743.596	Point 32	Rorb	Ai167	324.8	-168.526	758.806	no cnx
2018_11_30_exp2_TH	2	interneuron	2	185	743.596	Point 28	Rorb	Ai167	581.126	-80.6676	849.606	no cnx
2018_11_30_exp2_TH	2	interneuron	2	185	743.596	Point 29	Rorb	Ai167	650.462	0.794879	849.606	no cnx
2018_11_30_exp2_TH	2	interneuron	2	185	743.596	Point 20	Rorb	Ai167	403.855	-142.695	790.896	no cnx
2018_11_30_exp2_TH	2	interneuron	2	185	743.596	Point 21	Rorb	Ai167	703.986	-92.8641	839.526	no cnx
2018_11_30_exp2_TH	2	interneuron	2	185	743.596	Point 22	Rorb	Ai167	610.398	-128.844	839.526	no cnx
2018_11_30_exp2_TH	2	interneuron	2	185	743.596	Point 23	Rorb	Ai167	681.942	-22.6453	813.766	no cnx
2018_11_30_exp2_TH	2	interneuron	2	185	743.596	Point 24	Rorb	Ai167	600.536	97.0601	813.766	no cnx
2018_11_30_exp2_TH	2	interneuron	2	185	743.596	Point 25	Rorb	Ai167	511.299	-28.6719	849.606	no cnx
2018_11_30_exp2_TH	2	interneuron	2	185	743.596	Point 26	Rorb	Ai167	622.053	20.2851	849.606	no cnx
2018_11_30_exp2_TH	2	interneuron	2	185	743.596	Point 27	Rorb	Ai167	488.74	36.2522	849.606	no cnx
2018_11_30_exp2_TH	2	interneuron	2	185	743.596	Point 33	Rorb	Ai167	246.846	80.7185	758.806	no cnx
2018_04_23_exp3_AB	1	interneuron	2	201	86.484	TSeries_493_3	Rorb	Ai167	309.075	-139.451	54.684	no cnx
2018_04_23_exp3_AB	1	interneuron	2	201	86.484	TSeries_643_5	Rorb	Ai167	252.298	-116.329	48.004	no cnx
2018_04_23_exp3_AB	1	interneuron	2	201	86.484	TSeries_643_2	Rorb	Ai167	303.614	-200.361	48.004	no cnx
2018_04_23_exp3_AB	1	interneuron	2	201	86.484	TSeries_643_1	Rorb	Ai167	321.117	-211.835	48.004	no cnx
2018_04_23_exp3_AB	1	interneuron	2	201	86.484	TSeries_393_3	Rorb	Ai167	369.834	-173.6	90.724	no cnx
2018_04_23_exp3_AB	1	interneuron	2	201	86.484	TSeries_473_1	Rorb	Ai167	311.941	-176.719	78.014	no cnx
2018_04_23_exp3_AB	1	interneuron	2	201	86.484	TSeries_113_4	Rorb	Ai167	301.483	-90.2004	99.884	no cnx
2018_04_23_exp3_AB	1	interneuron	2	201	86.484	TSeries_113_3	Rorb	Ai167	325.005	-110.331	99.884	no cnx
2018_04_23_exp3_AB	1	interneuron	2	201	86.484	TSeries_113_2	Rorb	Ai167	282.17	-64.1993	99.884	excitatory
2018_04_23_exp3_AB	1	interneuron	2	201	86.484	TSeries_113_1	Rorb	Ai167	414.929	-48.6229	99.884	no cnx
2018_04_23_exp3_AB	1	interneuron	2	201	86.484	TSeries_523_1	Rorb	Ai167	204.438	-69.4992	115.044	no cnx
2018_04_23_exp3_AB	1	interneuron	2	201	86.484	TSeries_353_1	Rorb	Ai167	181.175	14.2274	114.004	no cnx
2018_04_23_exp3_AB	1	interneuron	2	201	86.484	TSeries_353_2	Rorb	Ai167	255.977	-64.53	114.004	no cnx
2018_04_23_exp3_AB	1	interneuron	2	201	86.484	TSeries_303_4	Rorb	Ai167	345.581	-107.295	90.544	no cnx
2018_04_23_exp3_AB	1	interneuron	2	201	86.484	TSeries_303_2	Rorb	Ai167	235.24	-32.0459	90.544	no cnx
2018_04_23_exp3_AB	1	interneuron	2	201	86.484	TSeries_303_3	Rorb	Ai167	275.29	-152.217	90.544	no cnx
2018_04_23_exp3_AB	1	interneuron	2	201	86.484	TSeries_303_1	Rorb	Ai167	291.856	-87.1998	90.544	no cnx
2018_04_23_exp3_AB	1	interneuron	2	201	86.484	TSeries_83_1	Rorb	Ai167	384.43	-81.415	60.614	no cnx
2018_04_23_exp3_AB	1	interneuron	2	201	86.484	TSeries_83_2	Rorb	Ai167	277.213	-40.3569	60.614	no cnx
2018_04_23_exp3_AB	1	interneuron	2	201	86.484	TSeries_83_3	Rorb	Ai167	345.625	-41.6011	60.614	no cnx
2018_04_23_exp3_AB	1	interneuron	2	201	86.484	TSeries_583_1	Rorb	Ai167	214.081	-268.209	99.884	no cnx
2018_04_23_exp3_AB	1	interneuron	2	201	86.484	TSeries_583_2	Rorb	Ai167	357.846	-314.402	99.884	no cnx
2018_04_23_exp3_AB	1	interneuron	2	201	86.484	TSeries_583_3	Rorb	Ai167	378.134	-154.023	99.884	no cnx
2018_04_23_exp1_TH	1	interneuron	2	178	-443.051	TSeries_148_3	Rorb	Ai167	415.23	65.1749	-386.781	no cnx
2018_04_23_exp1_TH	1	interneuron	2	178	-443.051	TSeries_148_2	Rorb	Ai167	358.456	-20.943	-386.781	no cnx
2018_04_23_exp1_TH	1	interneuron	2	178	-443.051	TSeries_148_1	Rorb	Ai167	385.565	-0.41134	-386.781	no cnx
2018_04_23_exp1_TH	1	interneuron	2	178	-443.051	TSeries_68_1	Rorb	Ai167	421.825	-75.2896	-425.321	no cnx
2018_04_23_exp1_TH	1	interneuron	2	178	-443.051	TSeries_68_2	Rorb	Ai167	398.625	-5.45099	-425.321	no cnx
2018_04_23_exp1_TH	1	interneuron	2	178	-443.051	TSeries_208_1	Rorb	Ai167	321.573	23.5595	-469.331	no cnx
2018_04_23_exp1_TH	1	interneuron	2	178	-443.051	TSeries_228_2	Rorb	Ai167	274.262	-153.633	-484.491	no cnx
2018_04_23_exp1_TH	1	interneuron	2	178	-443.051	TSeries_228_3	Rorb	Ai167	347.654	-141.585	-484.491	no cnx
2018_04_23_exp1_TH	1	interneuron	2	178	-443.051	TSeries_228_1	Rorb	Ai167	398.779	18.4213	-484.491	no cnx
2018_04_23_exp1_TH	1	interneuron	2	178	-443.051	TSeries_108_1	Rorb	Ai167	362.659	-0.152281	-420.831	no cnx
2018_04_23_exp1_TH	1	interneuron	2	178	-443.051	TSeries_28_1	Rorb	Ai167	364.959	-42.4253	-427.771	no cnx
2018_04_23_exp1_TH	1	interneuron	2	178	-443.051	TSeries_28_2	Rorb	Ai167	355.476	-18.0316	-427.771	no cnx
2018_04_23_exp1_TH	1	interneuron	2	178	-443.051	TSeries_128_1	Rorb	Ai167	361.35	37.2493	-399.741	no cnx

## Sheet: Fig5C_exc_PcnxVpia_PCandFSI
exc_L23pyr_bins	50	150	250	350	450	550	650	750	850	950
exc_L23pyr_midX	100	200	300	400	500	600	700	800	900
exc_L23pyr_probed_hist	323	363	519	1322	1293	851	385	451	386
exc_L23pyr_exc_hist	8	10	28	130	107	49	14	2	1
exc_L23pyr_exc_frac	0.0247678	0.0275482	0.0539499	0.0983359	0.0827533	0.0575793	0.0363636	0.00443459	0.00259067
exc_L23pyr_exc_ci_low	0.0117774	0.0142498	0.0369402	0.083163	0.0686655	0.0434083	0.0209908	0.000922631	0.00027967
exc_L23pyr_exc_ci_high	0.0461872	0.0483152	0.0759121	0.115265	0.0987061	0.0747517	0.0586576	0.0141494	0.0120441
exc_L23fsi_bins	50	150	250	350	450	550	650	750	850	950
exc_L23fsi_midX	100	200	300	400	500	600	700	800	900
exc_L23fsi_probed_hist	46	83	100	114	145	50	11	0	0
exc_L23fsi_exc_hist	12	15	8	12	7	5	0	0	0
exc_L23fsi_exc_frac	0.26087	0.180723	0.08	0.105263	0.0482759	0.1	0	nan	nan
exc_L23fsi_exc_ci_low	0.151221	0.109593	0.0385494	0.0588464	0.0218499	0.0391944	4.36358e-05	0.00154133	0.00154133
exc_L23fsi_exc_ci_high	0.399541	0.273657	0.145267	0.171388	0.0924348	0.205355	0.199995	0.998459	0.998459

## Sheet: Fig5D_exc_PcnxVhoriz
Penk_PC_lat_bins	0	100	200	300	400	500	600
Penk_PC_lat_midX	50	150	250	350	450	550
Penk_PC_lat_probed_hist	293	257	161	91	52	29
Penk_PC_lat_exc_hist	13	2	1	0	0	0
Penk_PC_lat_exc_frac	0.0443686	0.0077821	0.00621118	0	0	0
Penk_PC_lat_exc_ci_low	0.0250946	0.00162057	0.00067099	5.38e-06	9.4e-06	1.68e-05
Penk_PC_lat_exc_ci_high	0.0725669	0.0247284	0.0286589	0.0271524	0.0469367	0.0822865
RorbL4_PC_lat_bins	0	100	200	300	400	500	600
RorbL4_PC_lat_midX	50	150	250	350	450	550
RorbL4_PC_lat_probed_hist	816	478	217	112	48	28
RorbL4_PC_lat_exc_hist	95	41	12	2	0	0
RorbL4_PC_lat_exc_frac	0.116422	0.0857741	0.0552995	0.0178571	0	0
RorbL4_PC_lat_exc_ci_low	0.0957805	0.0631567	0.0305819	0.00372889	1.01767e-05	1.73809e-05
RorbL4_PC_lat_exc_ci_high	0.139777	0.113386	0.0917536	0.0560453	0.0507273	0.0850712
RorbL5_PC_lat_bins	0	100	200	300	400	500	600
RorbL5_PC_lat_midX	50	150	250	350	450	550
RorbL5_PC_lat_probed_hist	502	339	187	81	37	21
RorbL5_PC_lat_exc_hist	36	26	9	3	2	0
RorbL5_PC_lat_exc_frac	0.0717131	0.0766962	0.0481283	0.037037	0.0540541	0
RorbL5_PC_lat_exc_ci_low	0.0515757	0.0519243	0.0240773	0.0105398	0.0114016	2.31056e-05
RorbL5_PC_lat_exc_ci_high	0.0967683	0.108652	0.0859856	0.0955372	0.16229	0.11147
Tlx3L5_PC_lat_bins	0	100	200	300	400	500	600
Tlx3L5_PC_lat_midX	50	150	250	350	450	550
Tlx3L5_PC_lat_probed_hist	418	391	252	129	121	74
Tlx3L5_PC_lat_exc_hist	18	31	12	4	0	1
Tlx3L5_PC_lat_exc_frac	0.0430622	0.0792839	0.047619	0.0310078	0	0.0135135
Tlx3L5_PC_lat_exc_ci_low	0.0266495	0.0555764	0.0262914	0.0105551	4.04975e-06	0.00146196
Tlx3L5_PC_lat_exc_ci_high	0.065764	0.109187	0.0792373	0.0720299	0.0205038	0.061414
Penk_fsi_lat_bins	0	100	200	300	400	500	600
Penk_fsi_lat_midX	50	150	250	350	450	550
Penk_fsi_lat_probed_hist	58	50	16	1	0	0
Penk_fsi_lat_exc_hist	19	9	0	0	0	0
Penk_fsi_lat_exc_frac	0.327586	0.18	0	0	nan	nan
Penk_fsi_lat_exc_ci_low	0.217455	0.0929761	3.02135e-05	0.000385581	0.00154133	0.00154133
Penk_fsi_lat_exc_ci_high	0.454446	0.302805	0.143184	0.853254	0.998459	0.998459
RorbL4_fsi_lat_bins	0	100	200	300	400	500	600
RorbL4_fsi_lat_midX	50	150	250	350	450	550
RorbL4_fsi_lat_probed_hist	93	50	16	5	5	0
RorbL4_fsi_lat_exc_hist	9	4	0	1	1	0
RorbL4_fsi_lat_exc_frac	0.0967742	0.08	0	0.2	0.2	nan
RorbL4_fsi_lat_exc_ci_low	0.0489716	0.0276071	3.02135e-05	0.0225128	0.0225128	0.00154133
RorbL4_fsi_lat_exc_ci_high	0.169152	0.179066	0.143184	0.628626	0.628626	0.998459
RorbL5_fsi_lat_bins	0	100	200	300	400	500	600
RorbL5_fsi_lat_midX	50	150	250	350	450	550
RorbL5_fsi_lat_probed_hist	60	19	11	1	0	0
RorbL5_fsi_lat_exc_hist	4	0	0	0	0	0
RorbL5_fsi_lat_exc_frac	0.0666667	0	0	0	nan	nan
RorbL5_fsi_lat_exc_ci_low	0.0229194	2.55058e-05	4.36358e-05	0.000385581	0.00154133	0.00154133
RorbL5_fsi_lat_exc_ci_high	0.150741	0.122309	0.199995	0.853254	0.998459	0.998459
Tlx3L5_fsi_lat_bins	0	100	200	300	400	500	600
Tlx3L5_fsi_lat_midX	50	150	250	350	450	550
Tlx3L5_fsi_lat_probed_hist	35	23	13	12	28	26
Tlx3L5_fsi_lat_exc_hist	3	1	1	2	0	0
Tlx3L5_fsi_lat_exc_frac	0.0857143	0.0434783	0.0769231	0.166667	0	0
Tlx3L5_fsi_lat_exc_ci_low	0.0247363	0.00473202	0.00842966	0.0363378	1.73809e-05	1.87051e-05
Tlx3L5_fsi_lat_exc_ci_high	0.211401	0.185775	0.307149	0.436248	0.0850712	0.0912466
