# Supplementary material for: Synaptic connectivity to L2/3 of primary visual cortex measured by two-photon optogenetic stimulation
Source: eLife. 2022 Jan 21;11:e71103. doi: 10.7554/eLife.71103 (PMC8824465; doi:10.7554/eLife.71103)
Supplement: Figure 6—source data 1. [file elife-71103-fig6-data1.xlsx]

## Sheet: Figure6B_Pvalb_L23PC_map
exp_id	headstage	post_class	post_layer	postPia	post_z	MP_ID	prePia	x_ap	pre_z	cnx
2020_11_20_exp1_TH	2	pyramidal	2	139	568.334	Point 11	439.483	295.482	603.894	no cnx
2020_11_20_exp1_TH	2	pyramidal	2	139	568.334	Point 10	352.961	276.464	603.894	no cnx
2020_11_20_exp1_TH	2	pyramidal	2	139	568.334	Point 13	377.946	318.464	622.194	no cnx
2020_11_20_exp1_TH	2	pyramidal	2	139	568.334	Point 12	424.692	331.983	603.894	no cnx
2020_11_20_exp1_TH	2	pyramidal	2	139	568.334	Point 15	524.85	277.376	622.194	no cnx
2020_11_20_exp1_TH	2	pyramidal	2	139	568.334	Point 14	483.002	324.936	622.194	no cnx
2020_11_20_exp1_TH	2	pyramidal	2	139	568.334	Point 17	504.197	192.017	633.554	no cnx
2020_11_20_exp1_TH	2	pyramidal	2	139	568.334	Point 16	493.544	295.676	633.554	no cnx
2020_11_20_exp1_TH	2	pyramidal	2	139	568.334	Point 19	608.315	225.756	633.554	no cnx
2020_11_20_exp1_TH	2	pyramidal	2	139	568.334	Point 18	561.457	256.859	633.554	no cnx
2020_11_20_exp1_TH	2	pyramidal	2	139	568.334	Point 5	305.913	80.4124	630.484	no cnx
2020_11_20_exp1_TH	2	pyramidal	2	139	568.334	Point 4	327.411	-56.5477	593.854	no cnx
2020_11_20_exp1_TH	2	pyramidal	2	139	568.334	Point 7	346.797	101.127	567.024	no cnx
2020_11_20_exp1_TH	2	pyramidal	2	139	568.334	Point 6	347.374	3.06593	568.904	inhibitory
2020_11_20_exp1_TH	2	pyramidal	2	139	568.334	Point 1	163.338	17.6157	593.854	no cnx
2020_11_20_exp1_TH	2	pyramidal	2	139	568.334	Point 3	315.635	-79.7257	593.854	no cnx
2020_11_20_exp1_TH	2	pyramidal	2	139	568.334	Point 2	308.685	47.6754	579.714	inhibitory
2020_11_20_exp1_TH	2	pyramidal	2	139	568.334	Point 9	238.433	289.98	585.014	no cnx
2020_11_20_exp1_TH	2	pyramidal	2	139	568.334	Point 8	359.599	162.344	567.024	no cnx
2020_11_20_exp1_TH	2	pyramidal	2	139	568.334	Point 20	637.254	122.198	633.554	no cnx
2020_11_19_exp1_TH	3	pyramidal	2	244	353.494	Point 11	500.388	-48.118	314.354	no cnx
2020_11_19_exp1_TH	3	pyramidal	2	244	353.494	Point 10	442.213	47.8203	314.334	no cnx
2020_11_19_exp1_TH	3	pyramidal	2	244	353.494	Point 13	547.349	149.963	322.784	no cnx
2020_11_19_exp1_TH	3	pyramidal	2	244	353.494	Point 12	533.308	-3.34147	318.734	no cnx
2020_11_19_exp1_TH	3	pyramidal	2	244	353.494	Point 15	523.595	99.9984	341.594	no cnx
2020_11_19_exp1_TH	3	pyramidal	2	244	353.494	Point 14	562.48	-31.9135	341.594	no cnx
2020_11_19_exp1_TH	3	pyramidal	2	244	353.494	Point 17	616.945	91.3356	341.594	no cnx
2020_11_19_exp1_TH	3	pyramidal	2	244	353.494	Point 16	620.221	56.0552	341.594	no cnx
2020_11_19_exp1_TH	3	pyramidal	2	244	353.494	Point 19	652.474	51.5526	354.494	no cnx
2020_11_19_exp1_TH	3	pyramidal	2	244	353.494	Point 18	589.469	-4.20847	354.494	no cnx
2020_11_19_exp1_TH	3	pyramidal	2	244	353.494	Point 30	546.556	-144.263	391.474	no cnx
2020_11_19_exp1_TH	3	pyramidal	2	244	353.494	Point 5	422.459	66.1614	345.914	no cnx
2020_11_19_exp1_TH	3	pyramidal	2	244	353.494	Point 4	347.501	33.3726	345.914	no cnx
2020_11_19_exp1_TH	3	pyramidal	2	244	353.494	Point 7	430.176	-10.9448	338.564	no cnx
2020_11_19_exp1_TH	3	pyramidal	2	244	353.494	Point 6	329.751	-33.4308	338.564	inhibitory
2020_11_19_exp1_TH	3	pyramidal	2	244	353.494	Point 1	472.754	-135.577	364.764	no cnx
2020_11_19_exp1_TH	3	pyramidal	2	244	353.494	Point 3	400.644	14.2162	358.614	no cnx
2020_11_19_exp1_TH	3	pyramidal	2	244	353.494	Point 2	452.684	-83.8291	364.764	no cnx
2020_11_19_exp1_TH	3	pyramidal	2	244	353.494	Point 9	400.875	15.617	328.964	no cnx
2020_11_19_exp1_TH	3	pyramidal	2	244	353.494	Point 8	412.322	58.8694	328.964	no cnx
2020_11_19_exp1_TH	3	pyramidal	2	244	353.494	Point 28	578.645	-250.784	391.474	no cnx
2020_11_19_exp1_TH	3	pyramidal	2	244	353.494	Point 29	560.314	-203.217	391.474	no cnx
2020_11_19_exp1_TH	3	pyramidal	2	244	353.494	Point 20	642.96	154.266	354.494	no cnx
2020_11_19_exp1_TH	3	pyramidal	2	244	353.494	Point 21	604.196	194.003	354.494	no cnx
2020_11_19_exp1_TH	3	pyramidal	2	244	353.494	Point 22	614.666	73.2931	354.494	no cnx
2020_11_19_exp1_TH	3	pyramidal	2	244	353.494	Point 23	806.448	56.641	425.884	no cnx
2020_11_19_exp1_TH	3	pyramidal	2	244	353.494	Point 24	747.122	54.8415	392.174	no cnx
2020_11_19_exp1_TH	3	pyramidal	2	244	353.494	Point 25	781.36	144.989	392.174	no cnx
2020_11_19_exp1_TH	3	pyramidal	2	244	353.494	Point 26	680.974	-300.791	391.474	no cnx
2020_11_19_exp1_TH	3	pyramidal	2	244	353.494	Point 27	657.14	-260.542	391.474	no cnx
2020_09_03_exp2_TH	0	pyramidal	2	90	-83.8759	Point 5	138.095	-255.305	-98.576	no cnx
2020_09_03_exp2_TH	0	pyramidal	2	90	-83.8759	Point 4	194.205	-76.1814	-117.346	inhibitory
2020_09_03_exp2_TH	0	pyramidal	2	90	-83.8759	Point 7	196.84	-317.537	-98.576	no cnx
2020_09_03_exp2_TH	0	pyramidal	2	90	-83.8759	Point 6	78.9045	-290.468	-98.576	no cnx
2020_09_03_exp2_TH	0	pyramidal	2	90	-83.8759	Point 1	84.4096	-10.794	-79.746	inhibitory
2020_09_03_exp2_TH	0	pyramidal	2	90	-83.8759	Point 3	100.422	-131.115	-90.906	inhibitory
2020_09_03_exp2_TH	0	pyramidal	2	90	-83.8759	Point 2	154.161	23.7921	-90.906	no cnx
2020_09_03_exp2_TH	0	pyramidal	2	90	-83.8759	Point 9	149.813	138.152	-84.196	no cnx
2020_09_03_exp2_TH	0	pyramidal	2	90	-83.8759	Point 8	83.8219	-349.537	-122.396	no cnx
2020_09_03_exp2_TH	0	pyramidal	2	90	-83.8759	Point 11	240.552	323.591	-110.256	no cnx
2020_09_03_exp2_TH	0	pyramidal	2	90	-83.8759	Point 10	275.734	325.187	-84.196	no cnx
2020_07_26_exp3_TH	1	pyramidal	2	180	284.564	Point 5	254.982	9.52461	331.444	inhibitory
2020_07_26_exp3_TH	1	pyramidal	2	180	284.564	Point 4	425.568	87.685	342.244	no cnx
2020_07_26_exp3_TH	1	pyramidal	2	180	284.564	Point 7	312.15	66.686	331.444	inhibitory
2020_07_26_exp3_TH	1	pyramidal	2	180	284.564	Point 6	384.381	35.618	331.444	inhibitory
2020_07_26_exp3_TH	1	pyramidal	2	180	284.564	Point 3	425.474	68.5325	342.244	inhibitory
2020_07_26_exp3_TH	1	pyramidal	2	180	284.564	Point 2	308.866	0.876519	342.244	no cnx
2020_07_26_exp3_TH	1	pyramidal	2	180	284.564	Point 9	170.278	27.3347	293.794	no cnx
2020_07_26_exp3_TH	1	pyramidal	2	180	284.564	Point 8	337.445	209.942	331.444	no cnx
2020_07_26_exp3_TH	1	pyramidal	2	180	284.564	Point 11	275.816	212.086	293.794	no cnx
2020_07_26_exp3_TH	1	pyramidal	2	180	284.564	Point 10	248.821	121.329	293.794	no cnx
2020_07_26_exp3_TH	1	pyramidal	2	180	284.564	Point 13	323.551	47.7895	313.474	no cnx
2020_07_26_exp3_TH	1	pyramidal	2	180	284.564	Point 12	222.177	140.042	281.374	no cnx
2020_07_26_exp3_TH	1	pyramidal	2	180	284.564	Point 15	337.075	60.8213	313.474	no cnx
2020_07_26_exp3_TH	1	pyramidal	2	180	284.564	Point 14	336.803	179.681	313.474	no cnx
2020_07_26_exp3_TH	1	pyramidal	2	180	284.564	Point 17	206.596	259.528	321.994	no cnx
2020_07_26_exp3_TH	1	pyramidal	2	180	284.564	Point 16	373.646	228.873	313.474	no cnx
2020_07_26_exp3_TH	1	pyramidal	2	180	284.564	Point 19	381.559	314.532	308.614	no cnx
2020_07_26_exp3_TH	1	pyramidal	2	180	284.564	Point 18	418.611	365.218	321.994	no cnx
2020_07_26_exp3_TH	1	pyramidal	2	180	284.564	Point 20	302.209	303.32	308.614	no cnx
2020_07_26_exp3_TH	1	pyramidal	2	180	284.564	Point 22	357.708	376.255	308.614	no cnx
2020_07_26_exp2_TH	0	pyramidal	2	192	316.664	Point 11	468.091	143.587	282.894	no cnx
2020_07_26_exp2_TH	0	pyramidal	2	192	316.664	Point 10	477.129	38.5183	302.224	no cnx
2020_07_26_exp2_TH	0	pyramidal	2	192	316.664	Point 13	566.136	-51.6319	282.894	no cnx
2020_07_26_exp2_TH	0	pyramidal	2	192	316.664	Point 12	499.345	-42.4218	282.894	no cnx
2020_07_26_exp2_TH	0	pyramidal	2	192	316.664	Point 15	585.589	-44.3799	282.894	no cnx
2020_07_26_exp2_TH	0	pyramidal	2	192	316.664	Point 14	624.461	76.2669	282.894	no cnx
2020_07_26_exp2_TH	0	pyramidal	2	192	316.664	Point 17	409.906	364.365	288.424	no cnx
2020_07_26_exp2_TH	0	pyramidal	2	192	316.664	Point 16	507.862	266.555	288.424	no cnx
2020_07_26_exp2_TH	0	pyramidal	2	192	316.664	Point 19	302.087	386.072	288.424	no cnx
2020_07_26_exp2_TH	0	pyramidal	2	192	316.664	Point 18	464.761	512.971	288.424	no cnx
2020_07_26_exp2_TH	0	pyramidal	2	192	316.664	Point 5	478.849	91.7037	323.944	no cnx
2020_07_26_exp2_TH	0	pyramidal	2	192	316.664	Point 4	542.38	-36.4584	323.944	no cnx
2020_07_26_exp2_TH	0	pyramidal	2	192	316.664	Point 7	475.282	-77.8691	302.224	no cnx
2020_07_26_exp2_TH	0	pyramidal	2	192	316.664	Point 6	645.886	61.9602	323.944	no cnx
2020_07_26_exp2_TH	0	pyramidal	2	192	316.664	Point 1	227.971	5.00448	303.634	no cnx
2020_07_26_exp2_TH	0	pyramidal	2	192	316.664	Point 3	283.803	-189.194	330.964	inhibitory
2020_07_26_exp2_TH	0	pyramidal	2	192	316.664	Point 2	249.259	-19.2316	271.444	inhibitory
2020_07_26_exp2_TH	0	pyramidal	2	192	316.664	Point 9	653.074	22.6709	302.224	no cnx
2020_07_26_exp2_TH	0	pyramidal	2	192	316.664	Point 8	557.327	-20.6926	302.224	no cnx
2020_07_26_exp2_TH	0	pyramidal	2	192	316.664	Point 20	402.443	410.314	276.704	no cnx
2020_07_26_exp2_TH	0	pyramidal	2	192	316.664	Point 21	512.451	431.372	276.704	no cnx
2020_07_26_exp2_TH	0	pyramidal	2	192	316.664	Point 22	550.173	357.822	276.704	no cnx
2020_07_26_exp2_TH	0	pyramidal	2	192	316.664	Point 23	463.677	306.74	276.704	no cnx
2020_07_26_exp2_TH	0	pyramidal	2	192	316.664	Point 24	537.259	378.904	276.704	no cnx
2020_07_26_exp2_TH	0	pyramidal	2	192	316.664	Point 25	454.943	325.83	276.704	no cnx
2020_07_26_exp1_TH	2	pyramidal	2	134	279.494	Point 11	510.661	57.3806	300.274	no cnx
2020_07_26_exp1_TH	2	pyramidal	2	134	279.494	Point 10	456.283	97.2085	300.274	no cnx
2020_07_26_exp1_TH	2	pyramidal	2	134	279.494	Point 13	545.449	160.85	300.274	no cnx
2020_07_26_exp1_TH	2	pyramidal	2	134	279.494	Point 12	433.575	137.014	300.274	no cnx
2020_07_26_exp1_TH	2	pyramidal	2	134	279.494	Point 15	496.523	107.379	299.284	no cnx
2020_07_26_exp1_TH	2	pyramidal	2	134	279.494	Point 14	579.855	159.256	300.274	no cnx
2020_07_26_exp1_TH	2	pyramidal	2	134	279.494	Point 17	735.561	-25.8053	369.854	no cnx
2020_07_26_exp1_TH	2	pyramidal	2	134	279.494	Point 16	625.141	-36.4364	369.854	no cnx
2020_07_26_exp1_TH	2	pyramidal	2	134	279.494	Point 19	630.292	-10.1281	369.854	no cnx
2020_07_26_exp1_TH	2	pyramidal	2	134	279.494	Point 18	790.51	197.536	369.854	no cnx
2020_07_26_exp1_TH	2	pyramidal	2	134	279.494	Point 5	274.277	137.553	289.884	no cnx
2020_07_26_exp1_TH	2	pyramidal	2	134	279.494	Point 4	345.581	185.091	289.884	no cnx
2020_07_26_exp1_TH	2	pyramidal	2	134	279.494	Point 7	157.305	-14.562	225.834	inhibitory
2020_07_26_exp1_TH	2	pyramidal	2	134	279.494	Point 6	288.211	110.92	289.884	no cnx
2020_07_26_exp1_TH	2	pyramidal	2	134	279.494	Point 1	221.248	-21.0741	318.154	no cnx
2020_07_26_exp1_TH	2	pyramidal	2	134	279.494	Point 3	361.001	127.385	289.884	no cnx
2020_07_26_exp1_TH	2	pyramidal	2	134	279.494	Point 2	232.176	112.694	289.884	no cnx
2020_07_26_exp1_TH	2	pyramidal	2	134	279.494	Point 9	457.01	-22.972	300.274	no cnx
2020_07_26_exp1_TH	2	pyramidal	2	134	279.494	Point 8	398.315	-43.5038	302.174	no cnx
2020_07_26_exp1_TH	1	pyramidal	2	178	284.544	Point 11	512.306	82.0566	300.274	no cnx
2020_07_26_exp1_TH	1	pyramidal	2	178	284.544	Point 10	457.929	121.884	300.274	no cnx
2020_07_26_exp1_TH	1	pyramidal	2	178	284.544	Point 13	547.095	185.526	300.274	no cnx
2020_07_26_exp1_TH	1	pyramidal	2	178	284.544	Point 12	435.22	161.69	300.274	no cnx
2020_07_26_exp1_TH	1	pyramidal	2	178	284.544	Point 15	498.168	132.055	299.284	no cnx
2020_07_26_exp1_TH	1	pyramidal	2	178	284.544	Point 14	581.5	183.932	300.274	no cnx
2020_07_26_exp1_TH	1	pyramidal	2	178	284.544	Point 17	737.206	-1.12931	369.854	no cnx
2020_07_26_exp1_TH	1	pyramidal	2	178	284.544	Point 16	626.786	-11.7604	369.854	no cnx
2020_07_26_exp1_TH	1	pyramidal	2	178	284.544	Point 19	631.937	14.5479	369.854	no cnx
2020_07_26_exp1_TH	1	pyramidal	2	178	284.544	Point 18	792.155	222.212	369.854	no cnx
2020_07_26_exp1_TH	1	pyramidal	2	178	284.544	Point 30	408.937	351.16	323.874	no cnx
2020_07_26_exp1_TH	1	pyramidal	2	178	284.544	Point 5	275.922	162.229	289.884	no cnx
2020_07_26_exp1_TH	1	pyramidal	2	178	284.544	Point 4	347.226	209.767	289.884	no cnx
2020_07_26_exp1_TH	1	pyramidal	2	178	284.544	Point 7	158.95	10.114	225.834	inhibitory
2020_07_26_exp1_TH	1	pyramidal	2	178	284.544	Point 6	289.856	135.596	289.884	no cnx
2020_07_26_exp1_TH	1	pyramidal	2	178	284.544	Point 1	222.893	3.60194	318.154	no cnx
2020_07_26_exp1_TH	1	pyramidal	2	178	284.544	Point 3	362.646	152.061	289.884	no cnx
2020_07_26_exp1_TH	1	pyramidal	2	178	284.544	Point 2	233.821	137.37	289.884	no cnx
2020_07_26_exp1_TH	1	pyramidal	2	178	284.544	Point 9	458.655	1.70398	300.274	no cnx
2020_07_26_exp1_TH	1	pyramidal	2	178	284.544	Point 8	399.96	-18.8278	302.174	inhibitory
2020_07_26_exp1_TH	1	pyramidal	2	178	284.544	Point 28	308.884	388.864	323.874	no cnx
2020_07_26_exp1_TH	1	pyramidal	2	178	284.544	Point 29	414.377	365.184	323.874	no cnx
2020_07_26_exp1_TH	1	pyramidal	2	178	284.544	Point 20	431.301	190.677	363.354	no cnx
2020_07_26_exp1_TH	1	pyramidal	2	178	284.544	Point 21	386.019	293.166	363.354	no cnx
2020_07_26_exp1_TH	1	pyramidal	2	178	284.544	Point 22	416.035	238.774	363.354	no cnx
2020_07_26_exp1_TH	1	pyramidal	2	178	284.544	Point 23	454.712	379.152	363.354	no cnx
2020_07_26_exp1_TH	1	pyramidal	2	178	284.544	Point 24	447.465	322.823	363.354	no cnx
2020_07_26_exp1_TH	1	pyramidal	2	178	284.544	Point 25	324.617	296.406	334.504	no cnx
2020_07_26_exp1_TH	1	pyramidal	2	178	284.544	Point 26	421.486	202.243	334.504	no cnx
2020_07_26_exp1_TH	1	pyramidal	2	178	284.544	Point 27	376.436	227.042	334.504	no cnx
2020_07_24_exp3_TH	3	pyramidal	2	231	355.114	Point 11	593.804	128.031	334.744	no cnx
2020_07_24_exp3_TH	3	pyramidal	2	231	355.114	Point 10	590.173	148.661	343.454	no cnx
2020_07_24_exp3_TH	3	pyramidal	2	231	355.114	Point 13	484.061	-34.479	325.854	no cnx
2020_07_24_exp3_TH	3	pyramidal	2	231	355.114	Point 12	601.911	114.889	334.744	no cnx
2020_07_24_exp3_TH	3	pyramidal	2	231	355.114	Point 15	429.322	15.4313	318.024	no cnx
2020_07_24_exp3_TH	3	pyramidal	2	231	355.114	Point 14	670.014	149.8	325.854	no cnx
2020_07_24_exp3_TH	3	pyramidal	2	231	355.114	Point 17	531.905	135.35	318.024	no cnx
2020_07_24_exp3_TH	3	pyramidal	2	231	355.114	Point 16	498.731	47.9275	318.024	no cnx
2020_07_24_exp3_TH	3	pyramidal	2	231	355.114	Point 19	511.141	174.114	296.054	no cnx
2020_07_24_exp3_TH	3	pyramidal	2	231	355.114	Point 18	683.402	130.246	309.334	no cnx
2020_07_24_exp3_TH	3	pyramidal	2	231	355.114	Point 5	339.028	12.4083	354.284	no cnx
2020_07_24_exp3_TH	3	pyramidal	2	231	355.114	Point 4	194.732	-96.0806	354.284	no cnx
2020_07_24_exp3_TH	3	pyramidal	2	231	355.114	Point 7	414.327	-19.2524	343.454	no cnx
2020_07_24_exp3_TH	3	pyramidal	2	231	355.114	Point 6	402.677	-46.6061	354.284	no cnx
2020_07_24_exp3_TH	3	pyramidal	2	231	355.114	Point 1	265.526	-141.541	354.624	no cnx
2020_07_24_exp3_TH	3	pyramidal	2	231	355.114	Point 3	185.802	-55.202	369.944	no cnx
2020_07_24_exp3_TH	3	pyramidal	2	231	355.114	Point 9	636.882	146.368	343.454	no cnx
2020_07_24_exp3_TH	3	pyramidal	2	231	355.114	Point 8	452.838	-39.2204	343.454	no cnx
2020_07_24_exp3_TH	3	pyramidal	2	231	355.114	Point 28	399.598	74.8544	363.274	no cnx
2020_07_24_exp3_TH	3	pyramidal	2	231	355.114	Point 20	544.856	103.094	296.054	no cnx
2020_07_24_exp3_TH	3	pyramidal	2	231	355.114	Point 21	673.988	29.5227	296.054	no cnx
2020_07_24_exp3_TH	3	pyramidal	2	231	355.114	Point 22	507.958	7.53338	296.054	no cnx
2020_07_24_exp3_TH	3	pyramidal	2	231	355.114	Point 23	494.06	113.307	296.054	no cnx
2020_07_24_exp3_TH	3	pyramidal	2	231	355.114	Point 24	372.821	33.0447	329.914	no cnx
2020_07_24_exp3_TH	3	pyramidal	2	231	355.114	Point 25	285.035	-83.8497	329.914	no cnx
2020_07_24_exp3_TH	3	pyramidal	2	231	355.114	Point 26	209.103	-160.315	329.374	no cnx
2020_07_24_exp3_TH	3	pyramidal	2	231	355.114	Point 27	365.051	74.4173	363.274	no cnx
2020_07_24_exp3_TH	2	pyramidal	2	179	364.784	Point 11	593.795	117.971	334.744	no cnx
2020_07_24_exp3_TH	2	pyramidal	2	179	364.784	Point 10	590.164	138.602	343.454	no cnx
2020_07_24_exp3_TH	2	pyramidal	2	179	364.784	Point 13	484.052	-44.5384	325.854	no cnx
2020_07_24_exp3_TH	2	pyramidal	2	179	364.784	Point 12	601.901	104.83	334.744	no cnx
2020_07_24_exp3_TH	2	pyramidal	2	179	364.784	Point 15	429.313	5.37194	318.024	no cnx
2020_07_24_exp3_TH	2	pyramidal	2	179	364.784	Point 14	670.005	139.74	325.854	no cnx
2020_07_24_exp3_TH	2	pyramidal	2	179	364.784	Point 17	531.896	125.291	318.024	no cnx
2020_07_24_exp3_TH	2	pyramidal	2	179	364.784	Point 16	498.721	37.8681	318.024	no cnx
2020_07_24_exp3_TH	2	pyramidal	2	179	364.784	Point 19	511.132	164.054	296.054	no cnx
2020_07_24_exp3_TH	2	pyramidal	2	179	364.784	Point 18	683.393	120.187	309.334	no cnx
2020_07_24_exp3_TH	2	pyramidal	2	179	364.784	Point 5	339.019	2.34891	354.284	no cnx
2020_07_24_exp3_TH	2	pyramidal	2	179	364.784	Point 4	194.723	-106.14	354.284	no cnx
2020_07_24_exp3_TH	2	pyramidal	2	179	364.784	Point 7	414.318	-29.3118	343.454	no cnx
2020_07_24_exp3_TH	2	pyramidal	2	179	364.784	Point 6	402.668	-56.6655	354.284	no cnx
2020_07_24_exp3_TH	2	pyramidal	2	179	364.784	Point 1	265.517	-151.601	354.624	no cnx
2020_07_24_exp3_TH	2	pyramidal	2	179	364.784	Point 3	185.793	-65.2614	369.944	no cnx
2020_07_24_exp3_TH	2	pyramidal	2	179	364.784	Point 9	636.873	136.308	343.454	no cnx
2020_07_24_exp3_TH	2	pyramidal	2	179	364.784	Point 8	452.829	-49.2798	343.454	no cnx
2020_07_24_exp3_TH	2	pyramidal	2	179	364.784	Point 28	399.588	64.795	363.274	no cnx
2020_07_24_exp3_TH	2	pyramidal	2	179	364.784	Point 20	544.847	93.0343	296.054	no cnx
2020_07_24_exp3_TH	2	pyramidal	2	179	364.784	Point 21	673.979	19.4633	296.054	no cnx
2020_07_24_exp3_TH	2	pyramidal	2	179	364.784	Point 22	507.949	-2.52603	296.054	no cnx
2020_07_24_exp3_TH	2	pyramidal	2	179	364.784	Point 23	494.051	103.248	296.054	no cnx
2020_07_24_exp3_TH	2	pyramidal	2	179	364.784	Point 24	372.812	22.9853	329.914	no cnx
2020_07_24_exp3_TH	2	pyramidal	2	179	364.784	Point 25	285.026	-93.9091	329.914	no cnx
2020_07_24_exp3_TH	2	pyramidal	2	179	364.784	Point 26	209.094	-170.374	329.374	no cnx
2020_07_24_exp3_TH	2	pyramidal	2	179	364.784	Point 27	365.042	64.3579	363.274	no cnx
2020_07_24_exp2_TH	1	pyramidal	2	228	238.514	Point 11	592.198	8.04916	201.774	no cnx
2020_07_24_exp2_TH	1	pyramidal	2	228	238.514	Point 10	505.343	-130.4	206.234	no cnx
2020_07_24_exp2_TH	1	pyramidal	2	228	238.514	Point 13	713.517	74.5311	201.774	no cnx
2020_07_24_exp2_TH	1	pyramidal	2	228	238.514	Point 12	796.787	59.1326	201.774	no cnx
2020_07_24_exp2_TH	1	pyramidal	2	228	238.514	Point 15	755.087	-127.653	205.884	no cnx
2020_07_24_exp2_TH	1	pyramidal	2	228	238.514	Point 14	728.764	41.1322	192.634	no cnx
2020_07_24_exp2_TH	1	pyramidal	2	228	238.514	Point 17	794.697	131.305	205.884	no cnx
2020_07_24_exp2_TH	1	pyramidal	2	228	238.514	Point 16	796.994	-123.2	205.884	no cnx
2020_07_24_exp2_TH	1	pyramidal	2	228	238.514	Point 19	637.528	22.6918	225.414	no cnx
2020_07_24_exp2_TH	1	pyramidal	2	228	238.514	Point 18	582.481	-42.3819	225.414	no cnx
2020_07_24_exp2_TH	1	pyramidal	2	228	238.514	Point 31	614.919	-256.413	276.864	no cnx
2020_07_24_exp2_TH	1	pyramidal	2	228	238.514	Point 30	527.063	-234.79	276.864	no cnx
2020_07_24_exp2_TH	1	pyramidal	2	228	238.514	Point 35	590.202	-88.7509	266.814	no cnx
2020_07_24_exp2_TH	1	pyramidal	2	228	238.514	Point 34	581.288	-133.57	266.814	no cnx
2020_07_24_exp2_TH	1	pyramidal	2	228	238.514	Point 5	607.377	-106.413	243.624	no cnx
2020_07_24_exp2_TH	1	pyramidal	2	228	238.514	Point 4	540.737	-59.9032	224.414	no cnx
2020_07_24_exp2_TH	1	pyramidal	2	228	238.514	Point 7	525.042	73.3209	243.624	no cnx
2020_07_24_exp2_TH	1	pyramidal	2	228	238.514	Point 6	486.804	120.337	243.624	no cnx
2020_07_24_exp2_TH	1	pyramidal	2	228	238.514	Point 1	426.569	-3.84146	224.414	no cnx
2020_07_24_exp2_TH	1	pyramidal	2	228	238.514	Point 3	537.017	-70.7895	224.414	inhibitory
2020_07_24_exp2_TH	1	pyramidal	2	228	238.514	Point 2	491.535	-69.1554	224.414	no cnx
2020_07_24_exp2_TH	1	pyramidal	2	228	238.514	Point 9	490.342	81.7751	206.234	no cnx
2020_07_24_exp2_TH	1	pyramidal	2	228	238.514	Point 8	588.753	92.7824	243.624	no cnx
2020_07_24_exp2_TH	1	pyramidal	2	228	238.514	Point 32	556.661	-217.581	276.874	no cnx
2020_07_24_exp2_TH	1	pyramidal	2	228	238.514	Point 28	589.755	-169.43	286.734	no cnx
2020_07_24_exp2_TH	1	pyramidal	2	228	238.514	Point 29	497.79	-164.487	276.864	no cnx
2020_07_24_exp2_TH	1	pyramidal	2	228	238.514	Point 20	707.344	119.975	225.414	no cnx
2020_07_24_exp2_TH	1	pyramidal	2	228	238.514	Point 21	597.727	152.144	225.414	no cnx
2020_07_24_exp2_TH	1	pyramidal	2	228	238.514	Point 22	811.379	-64.4197	238.634	no cnx
2020_07_24_exp2_TH	1	pyramidal	2	228	238.514	Point 23	631.532	141.986	238.634	no cnx
2020_07_24_exp2_TH	1	pyramidal	2	228	238.514	Point 24	471.299	-309.663	286.734	no cnx
2020_07_24_exp2_TH	1	pyramidal	2	228	238.514	Point 25	614.155	-123.062	286.734	inhibitory
2020_07_24_exp2_TH	1	pyramidal	2	228	238.514	Point 26	544.389	-165.356	286.734	no cnx
2020_07_24_exp2_TH	1	pyramidal	2	228	238.514	Point 27	595.428	-116.921	286.734	no cnx
2020_07_24_exp2_TH	1	pyramidal	2	228	238.514	Point 33	432.771	-305.927	266.814	no cnx
2020_07_24_exp1_TH	2	pyramidal	2	229	186.594	Point 5	282.452	-83.9498	165.694	no cnx
2020_07_24_exp1_TH	2	pyramidal	2	229	186.594	Point 4	340.908	26.3911	196.654	no cnx
2020_07_24_exp1_TH	2	pyramidal	2	229	186.594	Point 7	438.728	-1.03831	165.694	no cnx
2020_07_24_exp1_TH	2	pyramidal	2	229	186.594	Point 6	370.522	-95.6306	165.694	no cnx
2020_07_24_exp1_TH	2	pyramidal	2	229	186.594	Point 1	384.225	-55.2423	188.924	inhibitory
2020_07_24_exp1_TH	2	pyramidal	2	229	186.594	Point 3	314.301	-116.417	196.654	no cnx
2020_07_24_exp1_TH	2	pyramidal	2	229	186.594	Point 2	182.953	-27.0889	188.924	no cnx
2020_07_24_exp1_TH	2	pyramidal	2	229	186.594	Point 21	508.253	262.011	208.384	no cnx
2020_07_24_exp1_TH	2	pyramidal	2	229	186.594	Point 9	478.026	-7.8542	182.594	no cnx
2020_07_24_exp1_TH	2	pyramidal	2	229	186.594	Point 8	395.179	-19.9701	138.004	no cnx
2020_07_24_exp1_TH	2	pyramidal	2	229	186.594	Point 11	556.767	-31.8947	201.194	no cnx
2020_07_24_exp1_TH	2	pyramidal	2	229	186.594	Point 10	508.825	3.6855	201.194	no cnx
2020_07_24_exp1_TH	2	pyramidal	2	229	186.594	Point 13	541.791	72.2981	176.924	no cnx
2020_07_24_exp1_TH	2	pyramidal	2	229	186.594	Point 12	565.221	-65.5887	163.074	no cnx
2020_07_24_exp1_TH	2	pyramidal	2	229	186.594	Point 15	596.473	172.749	176.924	no cnx
2020_07_24_exp1_TH	2	pyramidal	2	229	186.594	Point 14	623.185	46.8231	176.924	no cnx
2020_07_24_exp1_TH	2	pyramidal	2	229	186.594	Point 17	617.95	189.437	176.924	no cnx
2020_07_24_exp1_TH	2	pyramidal	2	229	186.594	Point 16	528.482	114.268	176.924	no cnx
2020_07_24_exp1_TH	2	pyramidal	2	229	186.594	Point 19	398.631	139.26	208.384	no cnx
2020_07_24_exp1_TH	2	pyramidal	2	229	186.594	Point 18	576.783	264.229	176.924	no cnx
2020_07_24_exp1_TH	2	pyramidal	2	229	186.594	Point 20	549.727	144.036	208.384	no cnx
2020_07_24_exp1_TH	1	pyramidal	2	204	186.124	Point 5	286.381	-49.5925	165.694	no cnx
2020_07_24_exp1_TH	1	pyramidal	2	204	186.124	Point 4	344.837	60.7484	196.654	no cnx
2020_07_24_exp1_TH	1	pyramidal	2	204	186.124	Point 7	442.657	33.319	165.694	no cnx
2020_07_24_exp1_TH	1	pyramidal	2	204	186.124	Point 6	374.451	-61.2732	165.694	no cnx
2020_07_24_exp1_TH	1	pyramidal	2	204	186.124	Point 1	388.154	-20.885	188.924	inhibitory
2020_07_24_exp1_TH	1	pyramidal	2	204	186.124	Point 3	318.23	-82.0595	196.654	no cnx
2020_07_24_exp1_TH	1	pyramidal	2	204	186.124	Point 2	186.882	7.26846	188.924	inhibitory
2020_07_24_exp1_TH	1	pyramidal	2	204	186.124	Point 21	512.182	296.368	208.384	no cnx
2020_07_24_exp1_TH	1	pyramidal	2	204	186.124	Point 9	481.955	26.5031	182.594	no cnx
2020_07_24_exp1_TH	1	pyramidal	2	204	186.124	Point 8	399.108	14.3872	138.004	no cnx
2020_07_24_exp1_TH	1	pyramidal	2	204	186.124	Point 11	560.696	2.46261	201.194	no cnx
2020_07_24_exp1_TH	1	pyramidal	2	204	186.124	Point 10	512.754	38.0428	201.194	no cnx
2020_07_24_exp1_TH	1	pyramidal	2	204	186.124	Point 13	545.72	106.655	176.924	no cnx
2020_07_24_exp1_TH	1	pyramidal	2	204	186.124	Point 12	569.15	-31.2314	163.074	no cnx
2020_07_24_exp1_TH	1	pyramidal	2	204	186.124	Point 15	600.402	207.107	176.924	no cnx
2020_07_24_exp1_TH	1	pyramidal	2	204	186.124	Point 14	627.114	81.1805	176.924	no cnx
2020_07_24_exp1_TH	1	pyramidal	2	204	186.124	Point 17	621.879	223.794	176.924	no cnx
2020_07_24_exp1_TH	1	pyramidal	2	204	186.124	Point 16	532.411	148.626	176.924	no cnx
2020_07_24_exp1_TH	1	pyramidal	2	204	186.124	Point 19	402.56	173.618	208.384	no cnx
2020_07_24_exp1_TH	1	pyramidal	2	204	186.124	Point 18	580.712	298.587	176.924	no cnx
2020_07_24_exp1_TH	1	pyramidal	2	204	186.124	Point 20	553.656	178.393	208.384	no cnx
2020_07_23_exp2_TH	3	pyramidal	2	287	326	Point 5	438.645	11.1097	336.324	no cnx
2020_07_23_exp2_TH	3	pyramidal	2	287	326	Point 4	416.186	31.4591	346.624	inhibitory
2020_07_23_exp2_TH	3	pyramidal	2	287	326	Point 7	463.77	-348.745	325.124	no cnx
2020_07_23_exp2_TH	3	pyramidal	2	287	326	Point 6	463.028	24.8701	336.324	no cnx
2020_07_23_exp2_TH	3	pyramidal	2	287	326	Point 1	494.546	27.3539	369.104	no cnx
2020_07_23_exp2_TH	3	pyramidal	2	287	326	Point 3	368.337	-91.2144	346.624	no cnx
2020_07_23_exp2_TH	3	pyramidal	2	287	326	Point 2	498.326	3.27232	360.754	no cnx
2020_07_23_exp2_TH	3	pyramidal	2	287	326	Point 9	475.135	-321.728	325.124	no cnx
2020_07_23_exp2_TH	3	pyramidal	2	287	326	Point 8	447.034	-259.637	325.124	no cnx
2020_07_23_exp2_TH	3	pyramidal	2	287	326	Point 11	458.53	-203.883	325.124	no cnx
2020_07_23_exp2_TH	3	pyramidal	2	287	326	Point 10	445.517	-275.995	325.124	no cnx
2020_07_23_exp1_TH	3	pyramidal	2	173	151	Point 11	397.466	-185.756	185.294	no cnx
2020_07_23_exp1_TH	3	pyramidal	2	173	151	Point 10	297.056	-200.482	185.294	inhibitory
2020_07_23_exp1_TH	3	pyramidal	2	173	151	Point 13	305.799	-49.2299	205.004	no cnx
2020_07_23_exp1_TH	3	pyramidal	2	173	151	Point 12	381.247	-121.557	185.294	no cnx
2020_07_23_exp1_TH	3	pyramidal	2	173	151	Point 15	340.737	-57.1361	205.004	inhibitory
2020_07_23_exp1_TH	3	pyramidal	2	173	151	Point 14	445.979	-74.2972	205.004	no cnx
2020_07_23_exp1_TH	3	pyramidal	2	173	151	Point 17	396.33	87.0611	205.004	no cnx
2020_07_23_exp1_TH	3	pyramidal	2	173	151	Point 16	405.648	28.4072	205.004	no cnx
2020_07_23_exp1_TH	3	pyramidal	2	173	151	Point 19	341.464	-143.347	212.014	no cnx
2020_07_23_exp1_TH	3	pyramidal	2	173	151	Point 18	340.94	8.37186	212.014	inhibitory
2020_07_23_exp1_TH	3	pyramidal	2	173	151	Point 31	546.403	-85.7714	242.074	no cnx
2020_07_23_exp1_TH	3	pyramidal	2	173	151	Point 30	495.766	-116.782	242.074	no cnx
2020_07_23_exp1_TH	3	pyramidal	2	173	151	Point 37	655.871	-26.3883	215.274	no cnx
2020_07_23_exp1_TH	3	pyramidal	2	173	151	Point 36	592.911	-106.012	215.274	no cnx
2020_07_23_exp1_TH	3	pyramidal	2	173	151	Point 35	608.866	-262.329	215.274	no cnx
2020_07_23_exp1_TH	3	pyramidal	2	173	151	Point 34	640.145	-61.972	198.844	no cnx
2020_07_23_exp1_TH	3	pyramidal	2	173	151	Point 5	369.151	-31.2587	123.024	inhibitory
2020_07_23_exp1_TH	3	pyramidal	2	173	151	Point 4	330.36	-101.403	123.024	no cnx
2020_07_23_exp1_TH	3	pyramidal	2	173	151	Point 7	446.931	-212.395	168.164	no cnx
2020_07_23_exp1_TH	3	pyramidal	2	173	151	Point 6	500.028	-134.134	168.164	no cnx
2020_07_23_exp1_TH	3	pyramidal	2	173	151	Point 1	121.293	-181.273	149.834	no cnx
2020_07_23_exp1_TH	3	pyramidal	2	173	151	Point 3	420.761	-246.667	123.024	no cnx
2020_07_23_exp1_TH	3	pyramidal	2	173	151	Point 2	251.125	-213.527	119.334	no cnx
2020_07_23_exp1_TH	3	pyramidal	2	173	151	Point 9	240.481	-156.937	185.294	no cnx
2020_07_23_exp1_TH	3	pyramidal	2	173	151	Point 8	314.42	-173.016	168.164	no cnx
2020_07_23_exp1_TH	3	pyramidal	2	173	151	Point 32	521.448	-214.707	198.844	no cnx
2020_07_23_exp1_TH	3	pyramidal	2	173	151	Point 40	512.37	-152.564	215.274	no cnx
2020_07_23_exp1_TH	3	pyramidal	2	173	151	Point 28	479.253	-281.655	242.074	no cnx
2020_07_23_exp1_TH	3	pyramidal	2	173	151	Point 29	541.508	-197.918	242.074	no cnx
2020_07_23_exp1_TH	3	pyramidal	2	173	151	Point 20	308.943	47.7051	212.014	no cnx
2020_07_23_exp1_TH	3	pyramidal	2	173	151	Point 21	273.821	58.7634	166.834	no cnx
2020_07_23_exp1_TH	3	pyramidal	2	173	151	Point 22	446.329	-299.91	249.134	no cnx
2020_07_23_exp1_TH	3	pyramidal	2	173	151	Point 23	612.056	-243.92	249.134	no cnx
2020_07_23_exp1_TH	3	pyramidal	2	173	151	Point 24	671.695	-159.638	249.134	no cnx
2020_07_23_exp1_TH	3	pyramidal	2	173	151	Point 25	485.876	-185.32	249.134	no cnx
2020_07_23_exp1_TH	3	pyramidal	2	173	151	Point 26	563.505	-64.2963	249.134	no cnx
2020_07_23_exp1_TH	3	pyramidal	2	173	151	Point 27	471.433	-253.01	249.134	no cnx
2020_07_23_exp1_TH	3	pyramidal	2	173	151	Point 39	642.782	-26.0242	215.274	no cnx
2020_07_23_exp1_TH	3	pyramidal	2	173	151	Point 33	613.062	-235.103	198.844	no cnx
2020_07_23_exp1_TH	3	pyramidal	2	173	151	Point 38	577.363	-252.939	215.274	no cnx
2020_07_23_exp1_TH	1	pyramidal	2	148	181	Point 11	401.188	114.944	185.294	no cnx
2020_07_23_exp1_TH	1	pyramidal	2	148	181	Point 10	300.777	100.219	185.294	inhibitory
2020_07_23_exp1_TH	1	pyramidal	2	148	181	Point 13	309.52	251.47	205.004	no cnx
2020_07_23_exp1_TH	1	pyramidal	2	148	181	Point 12	384.968	179.143	185.294	no cnx
2020_07_23_exp1_TH	1	pyramidal	2	148	181	Point 15	344.459	243.564	205.004	no cnx
2020_07_23_exp1_TH	1	pyramidal	2	148	181	Point 14	449.7	226.403	205.004	inhibitory
2020_07_23_exp1_TH	1	pyramidal	2	148	181	Point 17	400.052	387.761	205.004	no cnx
2020_07_23_exp1_TH	1	pyramidal	2	148	181	Point 16	409.369	329.107	205.004	no cnx
2020_07_23_exp1_TH	1	pyramidal	2	148	181	Point 19	345.185	157.353	212.014	no cnx
2020_07_23_exp1_TH	1	pyramidal	2	148	181	Point 18	344.661	309.072	212.014	no cnx
2020_07_23_exp1_TH	1	pyramidal	2	148	181	Point 31	550.124	214.929	242.074	no cnx
2020_07_23_exp1_TH	1	pyramidal	2	148	181	Point 30	499.487	183.918	242.074	no cnx
2020_07_23_exp1_TH	1	pyramidal	2	148	181	Point 37	659.592	274.312	215.274	no cnx
2020_07_23_exp1_TH	1	pyramidal	2	148	181	Point 36	596.633	194.688	215.274	no cnx
2020_07_23_exp1_TH	1	pyramidal	2	148	181	Point 35	612.587	38.3709	215.274	no cnx
2020_07_23_exp1_TH	1	pyramidal	2	148	181	Point 34	643.866	238.728	198.844	no cnx
2020_07_23_exp1_TH	1	pyramidal	2	148	181	Point 5	372.872	269.442	123.024	no cnx
2020_07_23_exp1_TH	1	pyramidal	2	148	181	Point 4	334.081	199.297	123.024	no cnx
2020_07_23_exp1_TH	1	pyramidal	2	148	181	Point 7	450.652	88.3051	168.164	no cnx
2020_07_23_exp1_TH	1	pyramidal	2	148	181	Point 6	503.749	166.566	168.164	no cnx
2020_07_23_exp1_TH	1	pyramidal	2	148	181	Point 1	125.014	119.428	149.834	no cnx
2020_07_23_exp1_TH	1	pyramidal	2	148	181	Point 3	424.482	54.0337	123.024	no cnx
2020_07_23_exp1_TH	1	pyramidal	2	148	181	Point 2	254.846	87.1735	119.334	no cnx
2020_07_23_exp1_TH	1	pyramidal	2	148	181	Point 9	244.202	143.764	185.294	no cnx
2020_07_23_exp1_TH	1	pyramidal	2	148	181	Point 8	318.141	127.685	168.164	no cnx
2020_07_23_exp1_TH	1	pyramidal	2	148	181	Point 32	525.169	85.9927	198.844	no cnx
2020_07_23_exp1_TH	1	pyramidal	2	148	181	Point 40	516.091	148.136	215.274	no cnx
2020_07_23_exp1_TH	1	pyramidal	2	148	181	Point 28	482.974	19.0451	242.074	no cnx
2020_07_23_exp1_TH	1	pyramidal	2	148	181	Point 29	545.23	102.782	242.074	no cnx
2020_07_23_exp1_TH	1	pyramidal	2	148	181	Point 20	312.665	348.405	212.014	no cnx
2020_07_23_exp1_TH	1	pyramidal	2	148	181	Point 21	277.542	359.464	166.834	no cnx
2020_07_23_exp1_TH	1	pyramidal	2	148	181	Point 22	450.05	0.790394	249.134	no cnx
2020_07_23_exp1_TH	1	pyramidal	2	148	181	Point 23	615.778	56.7802	249.134	no cnx
2020_07_23_exp1_TH	1	pyramidal	2	148	181	Point 24	675.416	141.063	249.134	no cnx
2020_07_23_exp1_TH	1	pyramidal	2	148	181	Point 25	489.597	115.381	249.134	no cnx
2020_07_23_exp1_TH	1	pyramidal	2	148	181	Point 26	567.226	236.404	249.134	no cnx
2020_07_23_exp1_TH	1	pyramidal	2	148	181	Point 27	475.154	47.6904	249.134	inhibitory
2020_07_23_exp1_TH	1	pyramidal	2	148	181	Point 39	646.504	274.676	215.274	no cnx
2020_07_23_exp1_TH	1	pyramidal	2	148	181	Point 33	616.783	65.5976	198.844	no cnx
2020_07_23_exp1_TH	1	pyramidal	2	148	181	Point 38	581.084	47.7613	215.274	no cnx
2020_07_19_exp2_TH	0	pyramidal	2	271	392.044	Point 11	468.153	-69.99	368.554	no cnx
2020_07_19_exp2_TH	0	pyramidal	2	271	392.044	Point 10	417.467	-42.6304	368.554	inhibitory
2020_07_19_exp2_TH	0	pyramidal	2	271	392.044	Point 13	446.572	9.7816	365.684	no cnx
2020_07_19_exp2_TH	0	pyramidal	2	271	392.044	Point 12	514.527	-15.4568	368.554	no cnx
2020_07_19_exp2_TH	0	pyramidal	2	271	392.044	Point 15	683.725	142.05	358.414	no cnx
2020_07_19_exp2_TH	0	pyramidal	2	271	392.044	Point 14	611.124	58.8008	358.414	no cnx
2020_07_19_exp2_TH	0	pyramidal	2	271	392.044	Point 17	611.326	-94.411	358.414	no cnx
2020_07_19_exp2_TH	0	pyramidal	2	271	392.044	Point 16	688.585	-52.9678	358.414	no cnx
2020_07_19_exp2_TH	0	pyramidal	2	271	392.044	Point 19	532.04	1.58514	340.914	no cnx
2020_07_19_exp2_TH	0	pyramidal	2	271	392.044	Point 18	740.273	215.552	358.414	no cnx
2020_07_19_exp2_TH	0	pyramidal	2	271	392.044	Point 5	574.44	-68.8935	384.904	no cnx
2020_07_19_exp2_TH	0	pyramidal	2	271	392.044	Point 4	472.451	-44.8271	384.904	no cnx
2020_07_19_exp2_TH	0	pyramidal	2	271	392.044	Point 7	389.347	100.847	384.914	inhibitory
2020_07_19_exp2_TH	0	pyramidal	2	271	392.044	Point 6	543.225	58.4763	384.914	no cnx
2020_07_19_exp2_TH	0	pyramidal	2	271	392.044	Point 1	207.141	115.161	367.474	no cnx
2020_07_19_exp2_TH	0	pyramidal	2	271	392.044	Point 3	164.477	253.494	354.304	no cnx
2020_07_19_exp2_TH	0	pyramidal	2	271	392.044	Point 2	201.42	157.892	367.474	no cnx
2020_07_19_exp2_TH	0	pyramidal	2	271	392.044	Point 9	468.415	183.868	376.794	no cnx
2020_07_19_exp2_TH	0	pyramidal	2	271	392.044	Point 8	471.123	-2.30102	376.794	no cnx
2020_07_19_exp2_TH	0	pyramidal	2	271	392.044	Point 28	525.127	-333.531	372.994	no cnx
2020_07_19_exp2_TH	0	pyramidal	2	271	392.044	Point 29	509.687	-220.582	372.994	no cnx
2020_07_19_exp2_TH	0	pyramidal	2	271	392.044	Point 20	479.05	67.3467	340.914	no cnx
2020_07_19_exp2_TH	0	pyramidal	2	271	392.044	Point 21	521.825	100.612	340.914	no cnx
2020_07_19_exp2_TH	0	pyramidal	2	271	392.044	Point 22	610.348	200.343	340.914	no cnx
2020_07_19_exp2_TH	0	pyramidal	2	271	392.044	Point 23	488.026	135.995	340.914	no cnx
2020_07_19_exp2_TH	0	pyramidal	2	271	392.044	Point 24	668.251	-240.712	383.154	no cnx
2020_07_19_exp2_TH	0	pyramidal	2	271	392.044	Point 25	474.693	-234.746	383.154	no cnx
2020_07_19_exp2_TH	0	pyramidal	2	271	392.044	Point 26	551.489	-333.842	383.154	no cnx
2020_07_19_exp2_TH	0	pyramidal	2	271	392.044	Point 27	441.089	-175.203	383.154	no cnx
2020_07_19_exp1_TH	2	pyramidal	2	184	243.294	Point 11	262.511	-113.076	289.144	inhibitory
2020_07_19_exp1_TH	2	pyramidal	2	184	243.294	Point 10	279.843	-142.724	289.144	inhibitory
2020_07_19_exp1_TH	2	pyramidal	2	184	243.294	Point 13	477.806	-23.4021	284.344	no cnx
2020_07_19_exp1_TH	2	pyramidal	2	184	243.294	Point 12	289.893	11.2358	289.144	inhibitory
2020_07_19_exp1_TH	2	pyramidal	2	184	243.294	Point 15	440.472	-94.0936	284.344	no cnx
2020_07_19_exp1_TH	2	pyramidal	2	184	243.294	Point 14	435.752	-71.1829	284.344	no cnx
2020_07_19_exp1_TH	2	pyramidal	2	184	243.294	Point 17	402.572	-52.5417	270.914	no cnx
2020_07_19_exp1_TH	2	pyramidal	2	184	243.294	Point 16	352.203	-195.309	270.914	no cnx
2020_07_19_exp1_TH	2	pyramidal	2	184	243.294	Point 19	443.101	-127.431	256.214	no cnx
2020_07_19_exp1_TH	2	pyramidal	2	184	243.294	Point 18	359.901	-135.6	256.214	no cnx
2020_07_19_exp1_TH	2	pyramidal	2	184	243.294	Point 31	609.413	-138.237	326.054	no cnx
2020_07_19_exp1_TH	2	pyramidal	2	184	243.294	Point 30	522.6	-21.0862	326.054	no cnx
2020_07_19_exp1_TH	2	pyramidal	2	184	243.294	Point 37	366.492	125.196	332.664	no cnx
2020_07_19_exp1_TH	2	pyramidal	2	184	243.294	Point 36	656.594	77.981	358.904	no cnx
2020_07_19_exp1_TH	2	pyramidal	2	184	243.294	Point 35	580.856	95.5337	383.764	no cnx
2020_07_19_exp1_TH	2	pyramidal	2	184	243.294	Point 34	610.712	141.213	383.764	no cnx
2020_07_19_exp1_TH	2	pyramidal	2	184	243.294	Point 5	162.055	-184.565	234.294	no cnx
2020_07_19_exp1_TH	2	pyramidal	2	184	243.294	Point 4	236.284	-109.537	224.064	inhibitory
2020_07_19_exp1_TH	2	pyramidal	2	184	243.294	Point 7	340.586	-96.1783	298.374	no cnx
2020_07_19_exp1_TH	2	pyramidal	2	184	243.294	Point 6	278.406	-100.468	298.374	no cnx
2020_07_19_exp1_TH	2	pyramidal	2	184	243.294	Point 1	181.998	-102.483	267.824	inhibitory
2020_07_19_exp1_TH	2	pyramidal	2	184	243.294	Point 3	311.175	-37.1469	267.834	inhibitory
2020_07_19_exp1_TH	2	pyramidal	2	184	243.294	Point 2	311.133	-137.851	267.834	no cnx
2020_07_19_exp1_TH	2	pyramidal	2	184	243.294	Point 9	411.725	-125.028	298.374	no cnx
2020_07_19_exp1_TH	2	pyramidal	2	184	243.294	Point 8	279.07	-67.3471	298.374	no cnx
2020_07_19_exp1_TH	2	pyramidal	2	184	243.294	Point 32	604.51	4.75797	383.764	no cnx
2020_07_19_exp1_TH	2	pyramidal	2	184	243.294	Point 40	214.961	-52.488	290.784	inhibitory
2020_07_19_exp1_TH	2	pyramidal	2	184	243.294	Point 28	575.986	-104.305	340.634	no cnx
2020_07_19_exp1_TH	2	pyramidal	2	184	243.294	Point 29	570.747	-26.7289	340.634	no cnx
2020_07_19_exp1_TH	2	pyramidal	2	184	243.294	Point 20	422.51	-61.6374	256.214	no cnx
2020_07_19_exp1_TH	2	pyramidal	2	184	243.294	Point 21	364.874	-60.699	256.214	no cnx
2020_07_19_exp1_TH	2	pyramidal	2	184	243.294	Point 22	445.182	38.7696	256.214	no cnx
2020_07_19_exp1_TH	2	pyramidal	2	184	243.294	Point 23	516.101	-124.808	351.744	no cnx
2020_07_19_exp1_TH	2	pyramidal	2	184	243.294	Point 24	494.283	-68.6646	351.744	no cnx
2020_07_19_exp1_TH	2	pyramidal	2	184	243.294	Point 25	456.43	-67.5152	351.744	no cnx
2020_07_19_exp1_TH	2	pyramidal	2	184	243.294	Point 26	537.428	76.965	351.744	no cnx
2020_07_19_exp1_TH	2	pyramidal	2	184	243.294	Point 27	652.477	-70.5133	340.634	no cnx
2020_07_19_exp1_TH	2	pyramidal	2	184	243.294	Point 39	404.92	39.3634	324.214	no cnx
2020_07_19_exp1_TH	2	pyramidal	2	184	243.294	Point 33	639.517	4.08484	383.764	no cnx
2020_07_19_exp1_TH	2	pyramidal	2	184	243.294	Point 38	349.03	-49.3518	324.214	inhibitory
2020_07_17_exp4_TH	3	pyramidal	2	251	223.264	Point 11	376.045	-271.54	254.044	no cnx
2020_07_17_exp4_TH	3	pyramidal	2	251	223.264	Point 10	368.281	-223.059	254.044	no cnx
2020_07_17_exp4_TH	3	pyramidal	2	251	223.264	Point 13	317.966	-137.179	244.904	no cnx
2020_07_17_exp4_TH	3	pyramidal	2	251	223.264	Point 12	286.237	-232.347	254.044	no cnx
2020_07_17_exp4_TH	3	pyramidal	2	251	223.264	Point 15	485.03	43.176	303.294	no cnx
2020_07_17_exp4_TH	3	pyramidal	2	251	223.264	Point 14	499.751	52.6945	322.944	no cnx
2020_07_17_exp4_TH	3	pyramidal	2	251	223.264	Point 17	485.666	13.6843	303.294	no cnx
2020_07_17_exp4_TH	3	pyramidal	2	251	223.264	Point 16	513.53	22.4049	303.294	no cnx
2020_07_17_exp4_TH	3	pyramidal	2	251	223.264	Point 19	754.164	244.888	358.564	no cnx
2020_07_17_exp4_TH	3	pyramidal	2	251	223.264	Point 18	547.164	56.8878	303.294	no cnx
2020_07_17_exp4_TH	3	pyramidal	2	251	223.264	Point 30	224.974	142.879	272.214	no cnx
2020_07_17_exp4_TH	3	pyramidal	2	251	223.264	Point 5	392.545	1.9339	273.434	inhibitory
2020_07_17_exp4_TH	3	pyramidal	2	251	223.264	Point 4	423.673	-37.2922	283.204	inhibitory
2020_07_17_exp4_TH	3	pyramidal	2	251	223.264	Point 7	430.345	12.6177	251.744	no cnx
2020_07_17_exp4_TH	3	pyramidal	2	251	223.264	Point 6	431.469	-19.0398	273.434	no cnx
2020_07_17_exp4_TH	3	pyramidal	2	251	223.264	Point 1	175.641	-34.9693	263.274	no cnx
2020_07_17_exp4_TH	3	pyramidal	2	251	223.264	Point 3	358.018	-26.1963	248.034	inhibitory
2020_07_17_exp4_TH	3	pyramidal	2	251	223.264	Point 2	153.62	102.441	248.034	no cnx
2020_07_17_exp4_TH	3	pyramidal	2	251	223.264	Point 9	252.349	-12.5147	239.124	no cnx
2020_07_17_exp4_TH	3	pyramidal	2	251	223.264	Point 8	391.513	27.6693	239.124	no cnx
2020_07_17_exp4_TH	3	pyramidal	2	251	223.264	Point 28	403.965	228.499	301.244	no cnx
2020_07_17_exp4_TH	3	pyramidal	2	251	223.264	Point 29	435.801	292.469	301.244	no cnx
2020_07_17_exp4_TH	3	pyramidal	2	251	223.264	Point 20	634.591	267.861	358.564	no cnx
2020_07_17_exp4_TH	3	pyramidal	2	251	223.264	Point 21	559.422	285.987	358.564	no cnx
2020_07_17_exp4_TH	3	pyramidal	2	251	223.264	Point 22	493.914	99.29	350.234	no cnx
2020_07_17_exp4_TH	3	pyramidal	2	251	223.264	Point 23	556.939	173.571	350.234	no cnx
2020_07_17_exp4_TH	3	pyramidal	2	251	223.264	Point 24	573.75	312.838	350.234	no cnx
2020_07_17_exp4_TH	3	pyramidal	2	251	223.264	Point 25	466.783	268.068	339.774	no cnx
2020_07_17_exp4_TH	3	pyramidal	2	251	223.264	Point 26	448.257	208.871	339.774	no cnx
2020_07_17_exp4_TH	3	pyramidal	2	251	223.264	Point 27	389.349	311.925	318.284	no cnx
2020_07_17_exp4_TH	2	pyramidal	2	205	246.524	Point 11	375.939	-253.141	254.044	no cnx
2020_07_17_exp4_TH	2	pyramidal	2	205	246.524	Point 10	368.176	-204.66	254.044	no cnx
2020_07_17_exp4_TH	2	pyramidal	2	205	246.524	Point 13	317.86	-118.78	244.904	no cnx
2020_07_17_exp4_TH	2	pyramidal	2	205	246.524	Point 12	286.131	-213.948	254.044	no cnx
2020_07_17_exp4_TH	2	pyramidal	2	205	246.524	Point 15	484.925	61.5751	303.294	no cnx
2020_07_17_exp4_TH	2	pyramidal	2	205	246.524	Point 14	499.646	71.0937	322.944	no cnx
2020_07_17_exp4_TH	2	pyramidal	2	205	246.524	Point 17	485.561	32.0835	303.294	no cnx
2020_07_17_exp4_TH	2	pyramidal	2	205	246.524	Point 16	513.424	40.8041	303.294	no cnx
2020_07_17_exp4_TH	2	pyramidal	2	205	246.524	Point 19	754.058	263.288	358.564	no cnx
2020_07_17_exp4_TH	2	pyramidal	2	205	246.524	Point 18	547.058	75.287	303.294	no cnx
2020_07_17_exp4_TH	2	pyramidal	2	205	246.524	Point 30	224.868	161.279	272.214	no cnx
2020_07_17_exp4_TH	2	pyramidal	2	205	246.524	Point 5	392.44	20.3331	273.434	inhibitory
2020_07_17_exp4_TH	2	pyramidal	2	205	246.524	Point 4	423.567	-18.893	283.204	inhibitory
2020_07_17_exp4_TH	2	pyramidal	2	205	246.524	Point 7	430.24	31.0169	251.744	no cnx
2020_07_17_exp4_TH	2	pyramidal	2	205	246.524	Point 6	431.364	-0.64068	273.434	no cnx
2020_07_17_exp4_TH	2	pyramidal	2	205	246.524	Point 1	175.535	-16.5702	263.274	no cnx
2020_07_17_exp4_TH	2	pyramidal	2	205	246.524	Point 3	357.913	-7.79717	248.034	inhibitory
2020_07_17_exp4_TH	2	pyramidal	2	205	246.524	Point 2	153.515	120.84	248.034	no cnx
2020_07_17_exp4_TH	2	pyramidal	2	205	246.524	Point 9	252.244	5.88449	239.124	no cnx
2020_07_17_exp4_TH	2	pyramidal	2	205	246.524	Point 8	391.408	46.0685	239.124	no cnx
2020_07_17_exp4_TH	2	pyramidal	2	205	246.524	Point 28	403.859	246.898	301.244	no cnx
2020_07_17_exp4_TH	2	pyramidal	2	205	246.524	Point 29	435.696	310.869	301.244	no cnx
2020_07_17_exp4_TH	2	pyramidal	2	205	246.524	Point 20	634.485	286.26	358.564	no cnx
2020_07_17_exp4_TH	2	pyramidal	2	205	246.524	Point 21	559.317	304.386	358.564	no cnx
2020_07_17_exp4_TH	2	pyramidal	2	205	246.524	Point 22	493.808	117.689	350.234	no cnx
2020_07_17_exp4_TH	2	pyramidal	2	205	246.524	Point 23	556.834	191.97	350.234	no cnx
2020_07_17_exp4_TH	2	pyramidal	2	205	246.524	Point 24	573.645	331.237	350.234	no cnx
2020_07_17_exp4_TH	2	pyramidal	2	205	246.524	Point 25	466.678	286.467	339.774	no cnx
2020_07_17_exp4_TH	2	pyramidal	2	205	246.524	Point 26	448.151	227.27	339.774	no cnx
2020_07_17_exp4_TH	2	pyramidal	2	205	246.524	Point 27	389.243	330.324	318.284	no cnx
2020_07_17_exp4_TH	1	pyramidal	2	232	269.524	Point 11	383.17	-192.281	254.044	no cnx
2020_07_17_exp4_TH	1	pyramidal	2	232	269.524	Point 10	375.407	-143.799	254.044	inhibitory
2020_07_17_exp4_TH	1	pyramidal	2	232	269.524	Point 13	325.091	-57.9192	244.904	no cnx
2020_07_17_exp4_TH	1	pyramidal	2	232	269.524	Point 12	293.362	-153.087	254.044	no cnx
2020_07_17_exp4_TH	1	pyramidal	2	232	269.524	Point 15	492.155	122.436	303.294	no cnx
2020_07_17_exp4_TH	1	pyramidal	2	232	269.524	Point 14	506.877	131.954	322.944	no cnx
2020_07_17_exp4_TH	1	pyramidal	2	232	269.524	Point 17	492.791	92.9439	303.294	no cnx
2020_07_17_exp4_TH	1	pyramidal	2	232	269.524	Point 16	520.655	101.665	303.294	no cnx
2020_07_17_exp4_TH	1	pyramidal	2	232	269.524	Point 19	761.289	324.148	358.564	no cnx
2020_07_17_exp4_TH	1	pyramidal	2	232	269.524	Point 18	554.289	136.147	303.294	no cnx
2020_07_17_exp4_TH	1	pyramidal	2	232	269.524	Point 30	232.099	222.139	272.214	no cnx
2020_07_17_exp4_TH	1	pyramidal	2	232	269.524	Point 5	399.671	81.1935	273.434	inhibitory
2020_07_17_exp4_TH	1	pyramidal	2	232	269.524	Point 4	430.798	41.9674	283.204	inhibitory
2020_07_17_exp4_TH	1	pyramidal	2	232	269.524	Point 7	437.47	91.8773	251.744	no cnx
2020_07_17_exp4_TH	1	pyramidal	2	232	269.524	Point 6	438.594	60.2198	273.434	no cnx
2020_07_17_exp4_TH	1	pyramidal	2	232	269.524	Point 1	182.766	44.2903	263.274	no cnx
2020_07_17_exp4_TH	1	pyramidal	2	232	269.524	Point 3	365.144	53.0633	248.034	inhibitory
2020_07_17_exp4_TH	1	pyramidal	2	232	269.524	Point 2	160.745	181.701	248.034	no cnx
2020_07_17_exp4_TH	1	pyramidal	2	232	269.524	Point 9	259.475	66.7449	239.124	no cnx
2020_07_17_exp4_TH	1	pyramidal	2	232	269.524	Point 8	398.639	106.929	239.124	no cnx
2020_07_17_exp4_TH	1	pyramidal	2	232	269.524	Point 28	411.09	307.759	301.244	no cnx
2020_07_17_exp4_TH	1	pyramidal	2	232	269.524	Point 29	442.927	371.729	301.244	no cnx
2020_07_17_exp4_TH	1	pyramidal	2	232	269.524	Point 20	641.716	347.121	358.564	no cnx
2020_07_17_exp4_TH	1	pyramidal	2	232	269.524	Point 21	566.547	365.247	358.564	no cnx
2020_07_17_exp4_TH	1	pyramidal	2	232	269.524	Point 22	501.039	178.55	350.234	no cnx
2020_07_17_exp4_TH	1	pyramidal	2	232	269.524	Point 23	564.064	252.83	350.234	no cnx
2020_07_17_exp4_TH	1	pyramidal	2	232	269.524	Point 24	580.875	392.098	350.234	no cnx
2020_07_17_exp4_TH	1	pyramidal	2	232	269.524	Point 25	473.908	347.328	339.774	no cnx
2020_07_17_exp4_TH	1	pyramidal	2	232	269.524	Point 26	455.382	288.13	339.774	no cnx
2020_07_17_exp4_TH	1	pyramidal	2	232	269.524	Point 27	396.474	391.184	318.284	no cnx
2020_07_17_exp4_TH	0	pyramidal	2	284	227.054	Point 11	379.41	-19.5246	254.044	no cnx
2020_07_17_exp4_TH	0	pyramidal	2	284	227.054	Point 10	371.647	28.9566	254.044	inhibitory
2020_07_17_exp4_TH	0	pyramidal	2	284	227.054	Point 13	321.331	114.837	244.904	no cnx
2020_07_17_exp4_TH	0	pyramidal	2	284	227.054	Point 12	289.602	19.6684	254.044	no cnx
2020_07_17_exp4_TH	0	pyramidal	2	284	227.054	Point 15	488.395	295.191	303.294	no cnx
2020_07_17_exp4_TH	0	pyramidal	2	284	227.054	Point 14	503.117	304.71	322.944	no cnx
2020_07_17_exp4_TH	0	pyramidal	2	284	227.054	Point 17	489.031	265.7	303.294	no cnx
2020_07_17_exp4_TH	0	pyramidal	2	284	227.054	Point 16	516.895	274.42	303.294	no cnx
2020_07_17_exp4_TH	0	pyramidal	2	284	227.054	Point 19	757.529	496.904	358.564	no cnx
2020_07_17_exp4_TH	0	pyramidal	2	284	227.054	Point 18	550.529	308.903	303.294	no cnx
2020_07_17_exp4_TH	0	pyramidal	2	284	227.054	Point 30	228.339	394.895	272.214	no cnx
2020_07_17_exp4_TH	0	pyramidal	2	284	227.054	Point 5	395.911	253.949	273.434	no cnx
2020_07_17_exp4_TH	0	pyramidal	2	284	227.054	Point 4	427.038	214.723	283.204	no cnx
2020_07_17_exp4_TH	0	pyramidal	2	284	227.054	Point 7	433.71	264.633	251.744	no cnx
2020_07_17_exp4_TH	0	pyramidal	2	284	227.054	Point 6	434.834	232.976	273.434	no cnx
2020_07_17_exp4_TH	0	pyramidal	2	284	227.054	Point 1	179.006	217.046	263.274	no cnx
2020_07_17_exp4_TH	0	pyramidal	2	284	227.054	Point 3	361.384	225.819	248.034	no cnx
2020_07_17_exp4_TH	0	pyramidal	2	284	227.054	Point 2	156.985	354.456	248.034	no cnx
2020_07_17_exp4_TH	0	pyramidal	2	284	227.054	Point 9	255.715	239.501	239.124	no cnx
2020_07_17_exp4_TH	0	pyramidal	2	284	227.054	Point 8	394.879	279.685	239.124	no cnx
2020_07_17_exp4_TH	0	pyramidal	2	284	227.054	Point 28	407.33	480.514	301.244	no cnx
2020_07_17_exp4_TH	0	pyramidal	2	284	227.054	Point 29	439.167	544.485	301.244	no cnx
2020_07_17_exp4_TH	0	pyramidal	2	284	227.054	Point 20	637.956	519.876	358.564	no cnx
2020_07_17_exp4_TH	0	pyramidal	2	284	227.054	Point 21	562.787	538.003	358.564	no cnx
2020_07_17_exp4_TH	0	pyramidal	2	284	227.054	Point 22	497.279	351.306	350.234	no cnx
2020_07_17_exp4_TH	0	pyramidal	2	284	227.054	Point 23	560.304	425.586	350.234	no cnx
2020_07_17_exp4_TH	0	pyramidal	2	284	227.054	Point 24	577.115	564.854	350.234	no cnx
2020_07_17_exp4_TH	0	pyramidal	2	284	227.054	Point 25	470.148	520.084	339.774	no cnx
2020_07_17_exp4_TH	0	pyramidal	2	284	227.054	Point 26	451.622	460.886	339.774	no cnx
2020_07_17_exp4_TH	0	pyramidal	2	284	227.054	Point 27	392.714	563.94	318.284	no cnx
2020_07_17_exp2_TH	3	pyramidal	2	160	326.524	Point 11	384.755	-246.925	313.944	no cnx
2020_07_17_exp2_TH	3	pyramidal	2	160	326.524	Point 10	469.584	-38.818	325.484	no cnx
2020_07_17_exp2_TH	3	pyramidal	2	160	326.524	Point 13	545.845	-98.2225	313.944	no cnx
2020_07_17_exp2_TH	3	pyramidal	2	160	326.524	Point 12	475.232	-135.14	313.944	no cnx
2020_07_17_exp2_TH	3	pyramidal	2	160	326.524	Point 15	425.393	-104.179	304.404	no cnx
2020_07_17_exp2_TH	3	pyramidal	2	160	326.524	Point 14	384.027	-212.687	313.944	no cnx
2020_07_17_exp2_TH	3	pyramidal	2	160	326.524	Point 17	428.035	42.9174	304.404	no cnx
2020_07_17_exp2_TH	3	pyramidal	2	160	326.524	Point 16	418.722	-51.408	304.404	no cnx
2020_07_17_exp2_TH	3	pyramidal	2	160	326.524	Point 19	411.787	-114.64	291.374	no cnx
2020_07_17_exp2_TH	3	pyramidal	2	160	326.524	Point 18	444.089	68.3939	304.404	no cnx
2020_07_17_exp2_TH	3	pyramidal	2	160	326.524	Point 31	716.102	75.0917	297.924	no cnx
2020_07_17_exp2_TH	3	pyramidal	2	160	326.524	Point 30	780.273	104.43	297.924	no cnx
2020_07_17_exp2_TH	3	pyramidal	2	160	326.524	Point 37	604.174	96.2031	282.824	no cnx
2020_07_17_exp2_TH	3	pyramidal	2	160	326.524	Point 36	588.374	38.596	282.824	no cnx
2020_07_17_exp2_TH	3	pyramidal	2	160	326.524	Point 35	827.888	75.0173	282.824	no cnx
2020_07_17_exp2_TH	3	pyramidal	2	160	326.524	Point 34	707.236	-79.5207	282.824	no cnx
2020_07_17_exp2_TH	3	pyramidal	2	160	326.524	Point 5	510.655	-73.5679	331.234	no cnx
2020_07_17_exp2_TH	3	pyramidal	2	160	326.524	Point 4	457.668	2.21595	331.234	no cnx
2020_07_17_exp2_TH	3	pyramidal	2	160	326.524	Point 7	421.225	-204.793	325.484	no cnx
2020_07_17_exp2_TH	3	pyramidal	2	160	326.524	Point 6	419.728	-125.124	325.484	no cnx
2020_07_17_exp2_TH	3	pyramidal	2	160	326.524	Point 1	222.835	-70.2279	357.124	inhibitory
2020_07_17_exp2_TH	3	pyramidal	2	160	326.524	Point 3	193.563	-25.9786	302.944	no cnx
2020_07_17_exp2_TH	3	pyramidal	2	160	326.524	Point 2	168.709	-132.949	313.134	no cnx
2020_07_17_exp2_TH	3	pyramidal	2	160	326.524	Point 9	543.373	-6.62411	325.484	no cnx
2020_07_17_exp2_TH	3	pyramidal	2	160	326.524	Point 8	519.205	-198.674	325.484	no cnx
2020_07_17_exp2_TH	3	pyramidal	2	160	326.524	Point 32	636.31	-29.0159	285.714	no cnx
2020_07_17_exp2_TH	3	pyramidal	2	160	326.524	Point 43	352.269	-230.806	280.444	no cnx
2020_07_17_exp2_TH	3	pyramidal	2	160	326.524	Point 40	707.817	-260.411	263.234	no cnx
2020_07_17_exp2_TH	3	pyramidal	2	160	326.524	Point 41	621.714	-353.078	263.234	no cnx
2020_07_17_exp2_TH	3	pyramidal	2	160	326.524	Point 28	669.272	95.4349	305.644	no cnx
2020_07_17_exp2_TH	3	pyramidal	2	160	326.524	Point 29	656.466	93.895	305.644	no cnx
2020_07_17_exp2_TH	3	pyramidal	2	160	326.524	Point 20	452.921	-25.8038	291.374	no cnx
2020_07_17_exp2_TH	3	pyramidal	2	160	326.524	Point 21	535.36	28.9459	291.374	no cnx
2020_07_17_exp2_TH	3	pyramidal	2	160	326.524	Point 22	678.597	-104.612	313.184	no cnx
2020_07_17_exp2_TH	3	pyramidal	2	160	326.524	Point 23	741.28	24.6535	313.184	no cnx
2020_07_17_exp2_TH	3	pyramidal	2	160	326.524	Point 24	763.271	25.0473	305.644	no cnx
2020_07_17_exp2_TH	3	pyramidal	2	160	326.524	Point 25	757.947	-18.5513	305.644	no cnx
2020_07_17_exp2_TH	3	pyramidal	2	160	326.524	Point 26	820.549	-79.3417	305.644	no cnx
2020_07_17_exp2_TH	3	pyramidal	2	160	326.524	Point 27	613.493	-63.0123	305.644	no cnx
2020_07_17_exp2_TH	3	pyramidal	2	160	326.524	Point 39	639.844	-339.916	263.234	no cnx
2020_07_17_exp2_TH	3	pyramidal	2	160	326.524	Point 33	736.202	-52.7571	282.824	no cnx
2020_07_17_exp2_TH	3	pyramidal	2	160	326.524	Point 38	561.67	-352.157	263.234	no cnx
2020_07_17_exp2_TH	2	pyramidal	2	154	334.344	Point 1	222.524	2.08109	357.124	no cnx
2020_07_17_exp2_TH	2	pyramidal	2	154	334.344	Point 3	193.251	46.3304	302.944	no cnx
2020_07_17_exp2_TH	2	pyramidal	2	154	334.344	Point 2	168.398	-60.6402	313.134	no cnx
2020_07_17_exp1_TH	3	pyramidal	2	142	197.314	Point 11	342.772	25.6862	187.054	no cnx
2020_07_17_exp1_TH	3	pyramidal	2	142	197.314	Point 10	333.698	-80.6065	187.054	no cnx
2020_07_17_exp1_TH	3	pyramidal	2	142	197.314	Point 13	311.19	35.8079	172.344	inhibitory
2020_07_17_exp1_TH	3	pyramidal	2	142	197.314	Point 12	117.853	-181.657	172.344	inhibitory
2020_07_17_exp1_TH	3	pyramidal	2	142	197.314	Point 15	523.143	0.225501	216.504	no cnx
2020_07_17_exp1_TH	3	pyramidal	2	142	197.314	Point 14	614.859	-83.7067	216.504	no cnx
2020_07_17_exp1_TH	3	pyramidal	2	142	197.314	Point 17	427.182	-65.2027	203.924	no cnx
2020_07_17_exp1_TH	3	pyramidal	2	142	197.314	Point 16	469.749	-97.3387	216.504	no cnx
2020_07_17_exp1_TH	3	pyramidal	2	142	197.314	Point 19	637.532	-16.3572	191.544	no cnx
2020_07_17_exp1_TH	3	pyramidal	2	142	197.314	Point 18	559.055	-102.326	203.924	no cnx
2020_07_17_exp1_TH	3	pyramidal	2	142	197.314	Point 31	678.18	-58.6626	163.274	no cnx
2020_07_17_exp1_TH	3	pyramidal	2	142	197.314	Point 30	700.688	48.4	163.274	no cnx
2020_07_17_exp1_TH	3	pyramidal	2	142	197.314	Point 37	478.924	214.704	181.354	no cnx
2020_07_17_exp1_TH	3	pyramidal	2	142	197.314	Point 36	515.263	62.3521	181.664	no cnx
2020_07_17_exp1_TH	3	pyramidal	2	142	197.314	Point 35	525.327	-26.8785	181.664	no cnx
2020_07_17_exp1_TH	3	pyramidal	2	142	197.314	Point 34	542.309	49.9583	181.664	no cnx
2020_07_17_exp1_TH	3	pyramidal	2	142	197.314	Point 5	298.127	-250.85	206.754	no cnx
2020_07_17_exp1_TH	3	pyramidal	2	142	197.314	Point 4	249.586	-95.7081	206.754	no cnx
2020_07_17_exp1_TH	3	pyramidal	2	142	197.314	Point 7	211.064	-68.563	206.754	no cnx
2020_07_17_exp1_TH	3	pyramidal	2	142	197.314	Point 6	210.957	-213.391	206.754	no cnx
2020_07_17_exp1_TH	3	pyramidal	2	142	197.314	Point 1	174.266	-117.77	214.424	no cnx
2020_07_17_exp1_TH	3	pyramidal	2	142	197.314	Point 3	258.088	-226.21	214.424	no cnx
2020_07_17_exp1_TH	3	pyramidal	2	142	197.314	Point 2	290.507	-125.131	214.424	no cnx
2020_07_17_exp1_TH	3	pyramidal	2	142	197.314	Point 9	249.927	-135.268	187.054	no cnx
2020_07_17_exp1_TH	3	pyramidal	2	142	197.314	Point 8	331.418	-27.184	206.754	inhibitory
2020_07_17_exp1_TH	3	pyramidal	2	142	197.314	Point 32	436.19	-47.7805	181.664	no cnx
2020_07_17_exp1_TH	3	pyramidal	2	142	197.314	Point 42	296.885	-306.214	196.484	no cnx
2020_07_17_exp1_TH	3	pyramidal	2	142	197.314	Point 43	350.792	-398.68	183.294	no cnx
2020_07_17_exp1_TH	3	pyramidal	2	142	197.314	Point 40	339.216	-287.584	196.484	no cnx
2020_07_17_exp1_TH	3	pyramidal	2	142	197.314	Point 41	361.136	-272.887	196.484	no cnx
2020_07_17_exp1_TH	3	pyramidal	2	142	197.314	Point 46	503.411	-290.46	183.294	no cnx
2020_07_17_exp1_TH	3	pyramidal	2	142	197.314	Point 44	291.575	-232.024	183.294	no cnx
2020_07_17_exp1_TH	3	pyramidal	2	142	197.314	Point 45	401.974	-350.455	183.294	no cnx
2020_07_17_exp1_TH	3	pyramidal	2	142	197.314	Point 28	725.951	45.4361	163.274	no cnx
2020_07_17_exp1_TH	3	pyramidal	2	142	197.314	Point 29	705.875	103.936	163.274	no cnx
2020_07_17_exp1_TH	3	pyramidal	2	142	197.314	Point 20	781.911	-86.2431	191.544	no cnx
2020_07_17_exp1_TH	3	pyramidal	2	142	197.314	Point 21	783.93	36.2913	191.544	no cnx
2020_07_17_exp1_TH	3	pyramidal	2	142	197.314	Point 22	702.038	-27.4267	184.514	no cnx
2020_07_17_exp1_TH	3	pyramidal	2	142	197.314	Point 23	636.36	-74.6649	184.514	no cnx
2020_07_17_exp1_TH	3	pyramidal	2	142	197.314	Point 24	684.165	5.39077	184.514	no cnx
2020_07_17_exp1_TH	3	pyramidal	2	142	197.314	Point 25	743.981	-0.379951	184.514	no cnx
2020_07_17_exp1_TH	3	pyramidal	2	142	197.314	Point 26	667.832	-26.792	175.094	no cnx
2020_07_17_exp1_TH	3	pyramidal	2	142	197.314	Point 27	755.865	133.492	170.734	no cnx
2020_07_17_exp1_TH	3	pyramidal	2	142	197.314	Point 39	389.951	-346.958	196.484	no cnx
2020_07_17_exp1_TH	3	pyramidal	2	142	197.314	Point 33	413.864	-19.4251	183.124	no cnx
2020_07_17_exp1_TH	3	pyramidal	2	142	197.314	Point 38	330.907	-384.151	196.484	no cnx
2020_07_17_exp1_TH	1	pyramidal	2	176	208.244	Point 11	344.106	106.046	187.054	no cnx
2020_07_17_exp1_TH	1	pyramidal	2	176	208.244	Point 10	335.033	-0.246639	187.054	no cnx
2020_07_17_exp1_TH	1	pyramidal	2	176	208.244	Point 13	312.525	116.168	172.344	no cnx
2020_07_17_exp1_TH	1	pyramidal	2	176	208.244	Point 12	119.187	-101.297	172.344	no cnx
2020_07_17_exp1_TH	1	pyramidal	2	176	208.244	Point 15	524.478	80.5854	216.504	no cnx
2020_07_17_exp1_TH	1	pyramidal	2	176	208.244	Point 14	616.194	-3.34687	216.504	no cnx
2020_07_17_exp1_TH	1	pyramidal	2	176	208.244	Point 17	428.516	15.1572	203.924	no cnx
2020_07_17_exp1_TH	1	pyramidal	2	176	208.244	Point 16	471.083	-16.9788	216.504	no cnx
2020_07_17_exp1_TH	1	pyramidal	2	176	208.244	Point 19	638.866	64.0027	191.544	no cnx
2020_07_17_exp1_TH	1	pyramidal	2	176	208.244	Point 18	560.39	-21.9657	203.924	no cnx
2020_07_17_exp1_TH	1	pyramidal	2	176	208.244	Point 31	679.515	21.6972	163.274	no cnx
2020_07_17_exp1_TH	1	pyramidal	2	176	208.244	Point 30	702.022	128.76	163.274	no cnx
2020_07_17_exp1_TH	1	pyramidal	2	176	208.244	Point 37	480.258	295.064	181.354	no cnx
2020_07_17_exp1_TH	1	pyramidal	2	176	208.244	Point 36	516.597	142.712	181.664	no cnx
2020_07_17_exp1_TH	1	pyramidal	2	176	208.244	Point 35	526.661	53.4814	181.664	no cnx
2020_07_17_exp1_TH	1	pyramidal	2	176	208.244	Point 34	543.644	130.318	181.664	no cnx
2020_07_17_exp1_TH	1	pyramidal	2	176	208.244	Point 5	299.461	-170.49	206.754	no cnx
2020_07_17_exp1_TH	1	pyramidal	2	176	208.244	Point 4	250.92	-15.3483	206.754	no cnx
2020_07_17_exp1_TH	1	pyramidal	2	176	208.244	Point 7	212.398	11.7969	206.754	inhibitory
2020_07_17_exp1_TH	1	pyramidal	2	176	208.244	Point 6	212.291	-133.031	206.754	no cnx
2020_07_17_exp1_TH	1	pyramidal	2	176	208.244	Point 1	175.601	-37.4102	214.424	no cnx
2020_07_17_exp1_TH	1	pyramidal	2	176	208.244	Point 3	259.423	-145.85	214.424	no cnx
2020_07_17_exp1_TH	1	pyramidal	2	176	208.244	Point 2	291.841	-44.7713	214.424	no cnx
2020_07_17_exp1_TH	1	pyramidal	2	176	208.244	Point 9	251.261	-54.9077	187.054	no cnx
2020_07_17_exp1_TH	1	pyramidal	2	176	208.244	Point 8	332.752	53.1759	206.754	inhibitory
2020_07_17_exp1_TH	1	pyramidal	2	176	208.244	Point 32	437.524	32.5794	181.664	no cnx
2020_07_17_exp1_TH	1	pyramidal	2	176	208.244	Point 42	298.22	-225.855	196.484	no cnx
2020_07_17_exp1_TH	1	pyramidal	2	176	208.244	Point 43	352.126	-318.32	183.294	no cnx
2020_07_17_exp1_TH	1	pyramidal	2	176	208.244	Point 40	340.55	-207.224	196.484	no cnx
2020_07_17_exp1_TH	1	pyramidal	2	176	208.244	Point 41	362.47	-192.527	196.484	no cnx
2020_07_17_exp1_TH	1	pyramidal	2	176	208.244	Point 46	504.745	-210.1	183.294	no cnx
2020_07_17_exp1_TH	1	pyramidal	2	176	208.244	Point 44	292.91	-151.664	183.294	no cnx
2020_07_17_exp1_TH	1	pyramidal	2	176	208.244	Point 45	403.309	-270.095	183.294	no cnx
2020_07_17_exp1_TH	1	pyramidal	2	176	208.244	Point 28	727.286	125.796	163.274	no cnx
2020_07_17_exp1_TH	1	pyramidal	2	176	208.244	Point 29	707.21	184.296	163.274	no cnx
2020_07_17_exp1_TH	1	pyramidal	2	176	208.244	Point 20	783.246	-5.88321	191.544	no cnx
2020_07_17_exp1_TH	1	pyramidal	2	176	208.244	Point 21	785.264	116.651	191.544	no cnx
2020_07_17_exp1_TH	1	pyramidal	2	176	208.244	Point 22	703.373	52.9332	184.514	no cnx
2020_07_17_exp1_TH	1	pyramidal	2	176	208.244	Point 23	637.695	5.69494	184.514	no cnx
2020_07_17_exp1_TH	1	pyramidal	2	176	208.244	Point 24	685.499	85.7506	184.514	no cnx
2020_07_17_exp1_TH	1	pyramidal	2	176	208.244	Point 25	745.315	79.9799	184.514	no cnx
2020_07_17_exp1_TH	1	pyramidal	2	176	208.244	Point 26	669.166	53.5678	175.094	no cnx
2020_07_17_exp1_TH	1	pyramidal	2	176	208.244	Point 27	757.2	213.852	170.734	no cnx
2020_07_17_exp1_TH	1	pyramidal	2	176	208.244	Point 39	391.285	-266.598	196.484	no cnx
2020_07_17_exp1_TH	1	pyramidal	2	176	208.244	Point 33	415.198	60.9348	183.124	inhibitory
2020_07_17_exp1_TH	1	pyramidal	2	176	208.244	Point 38	332.242	-303.791	196.484	no cnx
2020_07_17_exp1_TH	0	pyramidal	2	178	206.174	Point 11	346.364	210.81	187.054	no cnx
2020_07_17_exp1_TH	0	pyramidal	2	178	206.174	Point 10	337.29	104.517	187.054	inhibitory
2020_07_17_exp1_TH	0	pyramidal	2	178	206.174	Point 13	314.782	220.932	172.344	no cnx
2020_07_17_exp1_TH	0	pyramidal	2	178	206.174	Point 12	121.445	3.46734	172.344	no cnx
2020_07_17_exp1_TH	0	pyramidal	2	178	206.174	Point 5	301.719	-65.7258	206.754	no cnx
2020_07_17_exp1_TH	0	pyramidal	2	178	206.174	Point 4	253.178	89.4157	206.754	no cnx
2020_07_17_exp1_TH	0	pyramidal	2	178	206.174	Point 7	214.656	116.561	206.754	no cnx
2020_07_17_exp1_TH	0	pyramidal	2	178	206.174	Point 6	214.549	-28.2672	206.754	inhibitory
2020_07_17_exp1_TH	0	pyramidal	2	178	206.174	Point 1	177.858	67.3538	214.424	no cnx
2020_07_17_exp1_TH	0	pyramidal	2	178	206.174	Point 3	261.68	-41.0863	214.424	inhibitory
2020_07_17_exp1_TH	0	pyramidal	2	178	206.174	Point 2	294.099	59.9927	214.424	no cnx
2020_07_17_exp1_TH	0	pyramidal	2	178	206.174	Point 9	253.519	49.8563	187.054	no cnx
2020_07_17_exp1_TH	0	pyramidal	2	178	206.174	Point 8	335.01	157.94	206.754	no cnx
2020_05_21_exp1_TH	1	pyramidal	2	187	342.06	Point 11	506.524	76.0388	354.651	no cnx
2020_05_21_exp1_TH	1	pyramidal	2	187	342.06	Point 10	467.662	162.396	354.651	no cnx
2020_05_21_exp1_TH	1	pyramidal	2	187	342.06	Point 13	438.597	130.059	346.471	no cnx
2020_05_21_exp1_TH	1	pyramidal	2	187	342.06	Point 12	374.715	37.528	346.471	no cnx
2020_05_21_exp1_TH	1	pyramidal	2	187	342.06	Point 15	543.312	267.287	346.471	no cnx
2020_05_21_exp1_TH	1	pyramidal	2	187	342.06	Point 14	446.015	198.502	346.471	no cnx
2020_05_21_exp1_TH	1	pyramidal	2	187	342.06	Point 17	406.546	212.065	346.471	no cnx
2020_05_21_exp1_TH	1	pyramidal	2	187	342.06	Point 16	497.003	175.292	346.471	no cnx
2020_05_21_exp1_TH	1	pyramidal	2	187	342.06	Point 19	476.547	-18.4231	345.351	no cnx
2020_05_21_exp1_TH	1	pyramidal	2	187	342.06	Point 18	381.387	267.881	346.471	no cnx
2020_05_21_exp1_TH	1	pyramidal	2	187	342.06	Point 5	629.39	96.3594	364.161	no cnx
2020_05_21_exp1_TH	1	pyramidal	2	187	342.06	Point 4	392.611	116.412	367.431	no cnx
2020_05_21_exp1_TH	1	pyramidal	2	187	342.06	Point 7	496.001	89.5169	364.161	no cnx
2020_05_21_exp1_TH	1	pyramidal	2	187	342.06	Point 6	561.687	42.2107	364.161	no cnx
2020_05_21_exp1_TH	1	pyramidal	2	187	342.06	Point 1	250.499	23.1861	317.351	no cnx
2020_05_21_exp1_TH	1	pyramidal	2	187	342.06	Point 3	423.126	20.7578	367.431	no cnx
2020_05_21_exp1_TH	1	pyramidal	2	187	342.06	Point 2	427.591	-42.7833	367.431	no cnx
2020_05_21_exp1_TH	1	pyramidal	2	187	342.06	Point 9	517.291	99.3617	354.651	no cnx
2020_05_21_exp1_TH	1	pyramidal	2	187	342.06	Point 8	408.303	10.6743	354.651	no cnx
2020_05_21_exp1_TH	1	pyramidal	2	187	342.06	Point 20	422.18	-33.0195	333.201	no cnx
2020_05_21_exp1_TH	1	pyramidal	2	187	342.06	Point 21	465.11	-2.73513	333.201	no cnx
2020_05_21_exp1_TH	1	pyramidal	2	187	342.06	Point 22	466.159	348.23	350.521	no cnx
2020_05_21_exp1_TH	1	pyramidal	2	187	342.06	Point 23	375.144	272.195	343.591	no cnx
2020_05_21_exp1_TH	1	pyramidal	2	187	342.06	Point 24	457.368	274.489	343.591	no cnx
2020_05_21_exp1_TH	1	pyramidal	2	187	342.06	Point 25	460.019	300.792	343.591	no cnx
2020_05_20_exp1_TH	3	pyramidal	2	93	176.341	Point 11	183.734	10.3726	107.011	inhibitory
2020_05_20_exp1_TH	3	pyramidal	2	93	176.341	Point 10	412.732	77.9586	106.881	no cnx
2020_05_20_exp1_TH	3	pyramidal	2	93	176.341	Point 13	305.331	-19.5518	102.421	no cnx
2020_05_20_exp1_TH	3	pyramidal	2	93	176.341	Point 12	266.364	91.5321	102.421	no cnx
2020_05_20_exp1_TH	3	pyramidal	2	93	176.341	Point 15	364.57	-95.4764	103.721	no cnx
2020_05_20_exp1_TH	3	pyramidal	2	93	176.341	Point 14	265.47	-71.2233	103.721	no cnx
2020_05_20_exp1_TH	3	pyramidal	2	93	176.341	Point 17	332.826	-82.1986	103.721	no cnx
2020_05_20_exp1_TH	3	pyramidal	2	93	176.341	Point 16	417.898	30.3647	103.721	no cnx
2020_05_20_exp1_TH	3	pyramidal	2	93	176.341	Point 19	344.59	44.3755	89.541	no cnx
2020_05_20_exp1_TH	3	pyramidal	2	93	176.341	Point 18	363.729	13.1473	89.541	no cnx
2020_05_20_exp1_TH	3	pyramidal	2	93	176.341	Point 31	337.207	-273.093	132.781	no cnx
2020_05_20_exp1_TH	3	pyramidal	2	93	176.341	Point 30	317.703	-230.413	132.781	no cnx
2020_05_20_exp1_TH	3	pyramidal	2	93	176.341	Point 5	353.05	54.3897	114.591	no cnx
2020_05_20_exp1_TH	3	pyramidal	2	93	176.341	Point 4	347.684	-10.5859	117.021	inhibitory
2020_05_20_exp1_TH	3	pyramidal	2	93	176.341	Point 7	324.819	109.149	106.881	no cnx
2020_05_20_exp1_TH	3	pyramidal	2	93	176.341	Point 6	180.298	16.2558	111.101	inhibitory
2020_05_20_exp1_TH	3	pyramidal	2	93	176.341	Point 1	281.419	-11.0083	125.331	no cnx
2020_05_20_exp1_TH	3	pyramidal	2	93	176.341	Point 3	250.8	-9.01744	114.591	no cnx
2020_05_20_exp1_TH	3	pyramidal	2	93	176.341	Point 2	134.299	-55.79	117.021	inhibitory
2020_05_20_exp1_TH	3	pyramidal	2	93	176.341	Point 9	414.929	92.8641	106.881	no cnx
2020_05_20_exp1_TH	3	pyramidal	2	93	176.341	Point 8	413.214	158.889	106.881	no cnx
2020_05_20_exp1_TH	3	pyramidal	2	93	176.341	Point 28	289.069	-248.293	132.781	inhibitory
2020_05_20_exp1_TH	3	pyramidal	2	93	176.341	Point 29	355.313	-230.256	132.781	no cnx
2020_05_20_exp1_TH	3	pyramidal	2	93	176.341	Point 20	336.548	73.004	89.541	no cnx
2020_05_20_exp1_TH	3	pyramidal	2	93	176.341	Point 21	398.435	148.072	146.651	no cnx
2020_05_20_exp1_TH	3	pyramidal	2	93	176.341	Point 22	424.793	180.421	146.651	no cnx
2020_05_20_exp1_TH	3	pyramidal	2	93	176.341	Point 23	392.618	155.42	134.341	no cnx
2020_05_20_exp1_TH	3	pyramidal	2	93	176.341	Point 24	395.596	91.036	134.341	no cnx
2020_05_20_exp1_TH	3	pyramidal	2	93	176.341	Point 25	542.283	130.69	134.341	no cnx
2020_05_20_exp1_TH	3	pyramidal	2	93	176.341	Point 26	454.342	31.6663	134.341	no cnx
2020_05_20_exp1_TH	3	pyramidal	2	93	176.341	Point 27	391.572	75.3891	134.341	no cnx
2020_05_20_exp1_TH	1	pyramidal	2	177	107.751	Point 5	346.599	213.102	114.591	no cnx
2020_05_20_exp1_TH	1	pyramidal	2	177	107.751	Point 4	341.234	148.126	117.021	inhibitory
2020_05_20_exp1_TH	1	pyramidal	2	177	107.751	Point 1	274.969	147.704	125.331	no cnx
2020_05_20_exp1_TH	1	pyramidal	2	177	107.751	Point 3	244.35	149.695	114.591	no cnx
2020_05_20_exp1_TH	1	pyramidal	2	177	107.751	Point 2	127.848	102.922	117.021	inhibitory
2020_05_20_exp1_TH	0	pyramidal	2	178	103.221	Point 11	166.167	242.99	107.011	no cnx
2020_05_20_exp1_TH	0	pyramidal	2	178	103.221	Point 10	395.164	310.576	106.881	no cnx
2020_05_20_exp1_TH	0	pyramidal	2	178	103.221	Point 13	287.764	213.065	102.421	no cnx
2020_05_20_exp1_TH	0	pyramidal	2	178	103.221	Point 12	248.796	324.149	102.421	no cnx
2020_05_20_exp1_TH	0	pyramidal	2	178	103.221	Point 15	347.002	137.141	103.721	no cnx
2020_05_20_exp1_TH	0	pyramidal	2	178	103.221	Point 14	247.902	161.394	103.721	no cnx
2020_05_20_exp1_TH	0	pyramidal	2	178	103.221	Point 17	315.258	150.419	103.721	no cnx
2020_05_20_exp1_TH	0	pyramidal	2	178	103.221	Point 16	400.33	262.982	103.721	no cnx
2020_05_20_exp1_TH	0	pyramidal	2	178	103.221	Point 19	327.022	276.993	89.541	no cnx
2020_05_20_exp1_TH	0	pyramidal	2	178	103.221	Point 18	346.162	245.764	89.541	no cnx
2020_05_20_exp1_TH	0	pyramidal	2	178	103.221	Point 31	319.64	-40.4758	132.781	no cnx
2020_05_20_exp1_TH	0	pyramidal	2	178	103.221	Point 30	300.135	2.20453	132.781	no cnx
2020_05_20_exp1_TH	0	pyramidal	2	178	103.221	Point 5	335.482	287.007	114.591	no cnx
2020_05_20_exp1_TH	0	pyramidal	2	178	103.221	Point 4	330.117	222.031	117.021	no cnx
2020_05_20_exp1_TH	0	pyramidal	2	178	103.221	Point 7	307.252	341.766	106.881	no cnx
2020_05_20_exp1_TH	0	pyramidal	2	178	103.221	Point 6	162.73	248.873	111.101	inhibitory
2020_05_20_exp1_TH	0	pyramidal	2	178	103.221	Point 1	263.852	221.609	125.331	no cnx
2020_05_20_exp1_TH	0	pyramidal	2	178	103.221	Point 3	233.233	223.6	114.591	no cnx
2020_05_20_exp1_TH	0	pyramidal	2	178	103.221	Point 2	116.731	176.827	117.021	inhibitory
2020_05_20_exp1_TH	0	pyramidal	2	178	103.221	Point 9	397.361	325.481	106.881	no cnx
2020_05_20_exp1_TH	0	pyramidal	2	178	103.221	Point 8	395.647	391.506	106.881	no cnx
2020_05_20_exp1_TH	0	pyramidal	2	178	103.221	Point 28	271.502	-15.6762	132.781	inhibitory
2020_05_20_exp1_TH	0	pyramidal	2	178	103.221	Point 29	337.745	2.3614	132.781	no cnx
2020_05_20_exp1_TH	0	pyramidal	2	178	103.221	Point 20	318.981	305.621	89.541	no cnx
2020_05_20_exp1_TH	0	pyramidal	2	178	103.221	Point 21	380.868	380.689	146.651	no cnx
2020_05_20_exp1_TH	0	pyramidal	2	178	103.221	Point 22	407.225	413.038	146.651	no cnx
2020_05_20_exp1_TH	0	pyramidal	2	178	103.221	Point 23	375.051	388.037	134.341	no cnx
2020_05_20_exp1_TH	0	pyramidal	2	178	103.221	Point 24	378.028	323.653	134.341	no cnx
2020_05_20_exp1_TH	0	pyramidal	2	178	103.221	Point 25	524.716	363.307	134.341	no cnx
2020_05_20_exp1_TH	0	pyramidal	2	178	103.221	Point 26	436.774	264.284	134.341	no cnx
2020_05_20_exp1_TH	0	pyramidal	2	178	103.221	Point 27	374.004	308.006	134.341	no cnx
2020_03_23_exp2_TH	1	pyramidal	2	185	61.3	Point 5	182.959	-84.6765	85.041	no cnx
2020_03_23_exp2_TH	1	pyramidal	2	185	61.3	Point 4	197.049	-213.049	70.361	no cnx
2020_03_23_exp2_TH	1	pyramidal	2	185	61.3	Point 7	229.484	-40.8193	98.961	inhibitory
2020_03_23_exp2_TH	1	pyramidal	2	185	61.3	Point 6	282.627	-248.084	85.041	no cnx
2020_03_23_exp2_TH	1	pyramidal	2	185	61.3	Point 1	178.995	192.248	87.291	no cnx
2020_03_23_exp2_TH	1	pyramidal	2	185	61.3	Point 3	267.124	16.7671	29.831	no cnx
2020_03_23_exp2_TH	1	pyramidal	2	185	61.3	Point 2	214.608	190.849	87.291	no cnx
2020_03_23_exp2_TH	1	pyramidal	2	185	61.3	Point 9	265.287	448.549	104.581	no cnx
2020_03_23_exp2_TH	1	pyramidal	2	185	61.3	Point 8	216.136	-54.6667	84.281	no cnx
2020_03_23_exp2_TH	1	pyramidal	2	185	61.3	Point 11	275.926	536.844	89.411	no cnx
2020_03_23_exp2_TH	1	pyramidal	2	185	61.3	Point 10	265.374	413.898	104.581	no cnx
2020_03_23_exp2_TH	1	pyramidal	2	185	61.3	Point 12	200.624	565.847	72.291	no cnx
2020_03_23_exp1_TH	3	pyramidal	2	177	92	Point 11	474.58	10.6308	111.591	no cnx
2020_03_23_exp1_TH	3	pyramidal	2	177	92	Point 10	428.759	-101.349	111.591	no cnx
2020_03_23_exp1_TH	3	pyramidal	2	177	92	Point 13	529.526	-74.2823	93.691	no cnx
2020_03_23_exp1_TH	3	pyramidal	2	177	92	Point 12	490.767	-35.7664	93.691	no cnx
2020_03_23_exp1_TH	3	pyramidal	2	177	92	Point 15	474.938	21.9269	93.691	no cnx
2020_03_23_exp1_TH	3	pyramidal	2	177	92	Point 14	384.787	79.3762	93.691	inhibitory
2020_03_23_exp1_TH	3	pyramidal	2	177	92	Point 17	491.076	-117.594	84.171	no cnx
2020_03_23_exp1_TH	3	pyramidal	2	177	92	Point 16	320.492	-6.78995	84.171	no cnx
2020_03_23_exp1_TH	3	pyramidal	2	177	92	Point 19	331.002	-35.0073	84.171	inhibitory
2020_03_23_exp1_TH	3	pyramidal	2	177	92	Point 18	429.447	-165.634	84.171	no cnx
2020_03_23_exp1_TH	3	pyramidal	2	177	92	Point 31	672.994	196.35	161.551	no cnx
2020_03_23_exp1_TH	3	pyramidal	2	177	92	Point 30	576.335	89.7477	161.551	no cnx
2020_03_23_exp1_TH	3	pyramidal	2	177	92	Point 37	694.517	-77.1419	139.501	no cnx
2020_03_23_exp1_TH	3	pyramidal	2	177	92	Point 36	524.278	-93.3808	139.501	no cnx
2020_03_23_exp1_TH	3	pyramidal	2	177	92	Point 35	515.306	76.7456	139.501	no cnx
2020_03_23_exp1_TH	3	pyramidal	2	177	92	Point 34	603.464	48.9903	139.501	no cnx
2020_03_23_exp1_TH	3	pyramidal	2	177	92	Point 5	218.259	132.402	80.991	no cnx
2020_03_23_exp1_TH	3	pyramidal	2	177	92	Point 4	381.733	220.844	80.991	no cnx
2020_03_23_exp1_TH	3	pyramidal	2	177	92	Point 7	478.341	75.9402	108.341	no cnx
2020_03_23_exp1_TH	3	pyramidal	2	177	92	Point 6	314.75	113.349	108.341	no cnx
2020_03_23_exp1_TH	3	pyramidal	2	177	92	Point 1	205.291	249.917	97.631	no cnx
2020_03_23_exp1_TH	3	pyramidal	2	177	92	Point 3	200.029	152.945	80.991	no cnx
2020_03_23_exp1_TH	3	pyramidal	2	177	92	Point 2	336.351	197.007	97.631	no cnx
2020_03_23_exp1_TH	3	pyramidal	2	177	92	Point 9	327.995	-139.919	111.591	no cnx
2020_03_23_exp1_TH	3	pyramidal	2	177	92	Point 8	412.856	158.731	112.461	inhibitory
2020_03_23_exp1_TH	3	pyramidal	2	177	92	Point 32	658.758	238.831	161.551	no cnx
2020_03_23_exp1_TH	3	pyramidal	2	177	92	Point 40	234.045	448.642	141.111	no cnx
2020_03_23_exp1_TH	3	pyramidal	2	177	92	Point 41	319.696	395.176	141.111	no cnx
2020_03_23_exp1_TH	3	pyramidal	2	177	92	Point 28	481.648	128.266	170.461	no cnx
2020_03_23_exp1_TH	3	pyramidal	2	177	92	Point 29	441.578	240.676	161.551	no cnx
2020_03_23_exp1_TH	3	pyramidal	2	177	92	Point 20	578.573	240.23	188.691	no cnx
2020_03_23_exp1_TH	3	pyramidal	2	177	92	Point 21	550.832	216.901	188.691	no cnx
2020_03_23_exp1_TH	3	pyramidal	2	177	92	Point 22	517.723	178.231	188.691	no cnx
2020_03_23_exp1_TH	3	pyramidal	2	177	92	Point 23	641.921	249.951	180.281	no cnx
2020_03_23_exp1_TH	3	pyramidal	2	177	92	Point 24	630.792	200.777	180.281	no cnx
2020_03_23_exp1_TH	3	pyramidal	2	177	92	Point 25	512.665	235.394	170.461	no cnx
2020_03_23_exp1_TH	3	pyramidal	2	177	92	Point 26	464.307	226.415	170.461	no cnx
2020_03_23_exp1_TH	3	pyramidal	2	177	92	Point 27	464.108	79.8242	170.461	no cnx
2020_03_23_exp1_TH	3	pyramidal	2	177	92	Point 39	259.468	531.789	141.111	no cnx
2020_03_23_exp1_TH	3	pyramidal	2	177	92	Point 33	436.66	82.7308	139.501	no cnx
2020_03_23_exp1_TH	3	pyramidal	2	177	92	Point 38	558.107	62.5373	139.501	no cnx
2020_03_23_exp1_TH	0	pyramidal	2	170	111.651	Point 11	479.748	-180.993	111.591	no cnx
2020_03_23_exp1_TH	0	pyramidal	2	170	111.651	Point 10	433.927	-292.973	111.591	no cnx
2020_03_23_exp1_TH	0	pyramidal	2	170	111.651	Point 13	534.694	-265.906	93.691	no cnx
2020_03_23_exp1_TH	0	pyramidal	2	170	111.651	Point 12	495.935	-227.39	93.691	no cnx
2020_03_23_exp1_TH	0	pyramidal	2	170	111.651	Point 15	480.107	-169.697	93.691	no cnx
2020_03_23_exp1_TH	0	pyramidal	2	170	111.651	Point 14	389.956	-112.248	93.691	no cnx
2020_03_23_exp1_TH	0	pyramidal	2	170	111.651	Point 17	496.245	-309.218	84.171	no cnx
2020_03_23_exp1_TH	0	pyramidal	2	170	111.651	Point 16	325.66	-198.414	84.171	no cnx
2020_03_23_exp1_TH	0	pyramidal	2	170	111.651	Point 19	336.17	-226.631	84.171	no cnx
2020_03_23_exp1_TH	0	pyramidal	2	170	111.651	Point 18	434.615	-357.258	84.171	no cnx
2020_03_23_exp1_TH	0	pyramidal	2	170	111.651	Point 31	678.162	4.72566	161.551	no cnx
2020_03_23_exp1_TH	0	pyramidal	2	170	111.651	Point 30	581.504	-101.876	161.551	no cnx
2020_03_23_exp1_TH	0	pyramidal	2	170	111.651	Point 37	699.686	-268.766	139.501	no cnx
2020_03_23_exp1_TH	0	pyramidal	2	170	111.651	Point 36	529.446	-285.005	139.501	no cnx
2020_03_23_exp1_TH	0	pyramidal	2	170	111.651	Point 35	520.474	-114.878	139.501	no cnx
2020_03_23_exp1_TH	0	pyramidal	2	170	111.651	Point 34	608.632	-142.634	139.501	no cnx
2020_03_23_exp1_TH	0	pyramidal	2	170	111.651	Point 5	223.428	-59.2214	80.991	no cnx
2020_03_23_exp1_TH	0	pyramidal	2	170	111.651	Point 4	386.901	29.2201	80.991	no cnx
2020_03_23_exp1_TH	0	pyramidal	2	170	111.651	Point 7	483.509	-115.684	108.341	no cnx
2020_03_23_exp1_TH	0	pyramidal	2	170	111.651	Point 6	319.918	-78.2745	108.341	no cnx
2020_03_23_exp1_TH	0	pyramidal	2	170	111.651	Point 1	210.459	58.2936	97.631	inhibitory
2020_03_23_exp1_TH	0	pyramidal	2	170	111.651	Point 3	205.197	-38.679	80.991	inhibitory
2020_03_23_exp1_TH	0	pyramidal	2	170	111.651	Point 2	341.52	5.38281	97.631	inhibitory
2020_03_23_exp1_TH	0	pyramidal	2	170	111.651	Point 9	333.163	-331.543	111.591	no cnx
2020_03_23_exp1_TH	0	pyramidal	2	170	111.651	Point 8	418.024	-32.8931	112.461	inhibitory
2020_03_23_exp1_TH	0	pyramidal	2	170	111.651	Point 32	663.927	47.2074	161.551	no cnx
2020_03_23_exp1_TH	0	pyramidal	2	170	111.651	Point 40	239.214	257.018	141.111	no cnx
2020_03_23_exp1_TH	0	pyramidal	2	170	111.651	Point 41	324.865	203.553	141.111	no cnx
2020_03_23_exp1_TH	0	pyramidal	2	170	111.651	Point 28	486.816	-63.3574	170.461	no cnx
2020_03_23_exp1_TH	0	pyramidal	2	170	111.651	Point 29	446.746	49.0519	161.551	no cnx
2020_03_23_exp1_TH	0	pyramidal	2	170	111.651	Point 20	583.741	48.6064	188.691	no cnx
2020_03_23_exp1_TH	0	pyramidal	2	170	111.651	Point 21	556	25.2767	188.691	no cnx
2020_03_23_exp1_TH	0	pyramidal	2	170	111.651	Point 22	522.891	-13.3925	188.691	no cnx
2020_03_23_exp1_TH	0	pyramidal	2	170	111.651	Point 23	647.089	58.3275	180.281	no cnx
2020_03_23_exp1_TH	0	pyramidal	2	170	111.651	Point 24	635.96	9.15332	180.281	no cnx
2020_03_23_exp1_TH	0	pyramidal	2	170	111.651	Point 25	517.834	43.7706	170.461	no cnx
2020_03_23_exp1_TH	0	pyramidal	2	170	111.651	Point 26	469.475	34.7909	170.461	no cnx
2020_03_23_exp1_TH	0	pyramidal	2	170	111.651	Point 27	469.276	-111.8	170.461	no cnx
2020_03_23_exp1_TH	0	pyramidal	2	170	111.651	Point 39	264.637	340.165	141.111	no cnx
2020_03_23_exp1_TH	0	pyramidal	2	170	111.651	Point 33	441.828	-108.893	139.501	no cnx
2020_03_23_exp1_TH	0	pyramidal	2	170	111.651	Point 38	563.275	-129.087	139.501	no cnx

## Sheet: Figure6B_SstAAV_L23PC_map
exp_id	headstage	post_class	post_layer	postPia	post_z	MP_ID	prePia	x_ap	pre_z	cnx
2020_11_06_exp3_TH	2	pyramidal	2	341	293.824	Point 5	548.833	111.311	296.104	no cnx
2020_11_06_exp3_TH	2	pyramidal	2	341	293.824	Point 4	511.021	67.4245	296.104	no cnx
2020_11_06_exp3_TH	2	pyramidal	2	341	293.824	Point 7	617.937	-24.857	286.704	no cnx
2020_11_06_exp3_TH	2	pyramidal	2	341	293.824	Point 6	486.384	-25.1744	281.714	inhibitory
2020_11_06_exp3_TH	2	pyramidal	2	341	293.824	Point 1	462.721	130.953	320.654	no cnx
2020_11_06_exp3_TH	2	pyramidal	2	341	293.824	Point 3	452.689	133.937	296.104	inhibitory
2020_11_06_exp3_TH	2	pyramidal	2	341	293.824	Point 2	568.792	115.391	312.484	no cnx
2020_11_06_exp3_TH	2	pyramidal	2	341	293.824	Point 9	559.45	21.9603	272.324	inhibitory
2020_11_06_exp3_TH	2	pyramidal	2	341	293.824	Point 8	498.469	-64.5343	272.324	no cnx
2020_11_06_exp3_TH	2	pyramidal	2	341	293.824	Point 11	440.974	102.283	242.254	no cnx
2020_11_06_exp3_TH	2	pyramidal	2	341	293.824	Point 10	412.517	29.0361	242.254	inhibitory
2020_11_06_exp3_TH	2	pyramidal	2	341	293.824	Point 12	532.645	-42.1191	242.254	inhibitory
2020_11_06_exp1_TH	2	pyramidal	2	166	457.404	Point 5	162.084	83.4165	472.944	no cnx
2020_11_06_exp1_TH	2	pyramidal	2	166	457.404	Point 4	388.639	164.361	456.024	no cnx
2020_11_06_exp1_TH	2	pyramidal	2	166	457.404	Point 7	431.143	-22.2493	414.424	no cnx
2020_11_06_exp1_TH	2	pyramidal	2	166	457.404	Point 6	435.099	-80.5783	382.504	inhibitory
2020_11_06_exp1_TH	2	pyramidal	2	166	457.404	Point 1	290.476	13.8969	486.514	no cnx
2020_11_06_exp1_TH	2	pyramidal	2	166	457.404	Point 3	364.924	102.881	456.024	no cnx
2020_11_06_exp1_TH	2	pyramidal	2	166	457.404	Point 2	213.524	-0.713485	456.024	inhibitory
2020_11_06_exp1_TH	2	pyramidal	2	166	457.404	Point 8	412.934	74.287	414.424	no cnx
2020_11_06_exp1_TH	2	pyramidal	2	166	457.404	Point 11	414.955	64.5075	404.434	inhibitory
2020_11_06_exp1_TH	2	pyramidal	2	166	457.404	Point 10	360.346	-129.419	404.434	no cnx
2020_11_06_exp1_TH	2	pyramidal	2	166	457.404	Point 13	491.34	-153.932	384.954	no cnx
2020_11_06_exp1_TH	2	pyramidal	2	166	457.404	Point 12	498.377	80.1156	404.434	no cnx
2020_11_06_exp1_TH	2	pyramidal	2	166	457.404	Point 15	397.228	2.07356	384.954	no cnx
2020_11_06_exp1_TH	2	pyramidal	2	166	457.404	Point 14	496.067	30.7123	384.954	inhibitory
2020_11_06_exp1_TH	2	pyramidal	2	166	457.404	Point 16	510.805	57.5521	384.954	no cnx
2020_11_05_exp4_TH	2	pyramidal	2	150	353.744	Point 5	445.527	147.564	329.234	no cnx
2020_11_05_exp4_TH	2	pyramidal	2	150	353.744	Point 4	238.143	124.452	331.534	no cnx
2020_11_05_exp4_TH	2	pyramidal	2	150	353.744	Point 7	349.154	225.614	307.424	no cnx
2020_11_05_exp4_TH	2	pyramidal	2	150	353.744	Point 6	342.109	268.73	307.424	no cnx
2020_11_05_exp4_TH	2	pyramidal	2	150	353.744	Point 1	267.995	101.69	396.714	inhibitory
2020_11_05_exp4_TH	2	pyramidal	2	150	353.744	Point 3	261.285	104.441	340.274	no cnx
2020_11_05_exp4_TH	2	pyramidal	2	150	353.744	Point 2	345.625	-32.4613	388.324	no cnx
2020_11_05_exp4_TH	2	pyramidal	2	150	353.744	Point 8	487.532	189.012	307.424	no cnx
2020_11_05_exp4_TH	1	pyramidal	2	174	321.454	Point 5	447.804	68.9044	329.234	inhibitory
2020_11_05_exp4_TH	1	pyramidal	2	174	321.454	Point 4	240.42	45.7921	331.534	no cnx
2020_11_05_exp4_TH	1	pyramidal	2	174	321.454	Point 7	351.43	146.954	307.424	no cnx
2020_11_05_exp4_TH	1	pyramidal	2	174	321.454	Point 6	344.385	190.071	307.424	no cnx
2020_11_05_exp4_TH	1	pyramidal	2	174	321.454	Point 1	270.272	23.0302	396.714	inhibitory
2020_11_05_exp4_TH	1	pyramidal	2	174	321.454	Point 3	263.562	25.781	340.274	no cnx
2020_11_05_exp4_TH	1	pyramidal	2	174	321.454	Point 2	347.902	-111.121	388.324	inhibitory
2020_11_05_exp4_TH	1	pyramidal	2	174	321.454	Point 8	489.809	110.353	307.424	no cnx
2020_11_05_exp2_TH	2	pyramidal	2	147	325	Point 1	149.409	-34.4033	367.164	inhibitory
2020_11_05_exp2_TH	2	pyramidal	2	147	325	Point 3	94.9261	-100.277	345.454	no cnx
2020_11_05_exp2_TH	2	pyramidal	2	147	325	Point 2	272.268	-7.81553	367.164	inhibitory
2020_11_05_exp2_TH	1	pyramidal	2	177	369	Point 1	148.477	-126.486	367.164	no cnx
2020_11_05_exp2_TH	1	pyramidal	2	177	369	Point 3	93.9946	-192.359	345.454	no cnx
2020_11_05_exp2_TH	1	pyramidal	2	177	369	Point 2	271.336	-99.8977	367.164	inhibitory
2020_11_05_exp1_TH	1	pyramidal	2	180	582.534	Point 4	339.772	95.2492	594.164	inhibitory
2020_11_05_exp1_TH	1	pyramidal	2	180	582.534	Point 1	250.152	48.0061	625.424	no cnx
2020_11_05_exp1_TH	1	pyramidal	2	180	582.534	Point 3	275.041	-5.8633	566.204	inhibitory
2020_11_05_exp1_TH	1	pyramidal	2	180	582.534	Point 2	315.481	233.089	625.424	no cnx
2020_10_30_exp2_TH	2	pyramidal	2	170	420.154	Point 5	501.564	30.4152	471.264	inhibitory
2020_10_30_exp2_TH	2	pyramidal	2	170	420.154	Point 7	502.704	89.488	430.704	no cnx
2020_10_30_exp2_TH	2	pyramidal	2	170	420.154	Point 6	448.932	-62.7277	430.704	no cnx
2020_10_30_exp2_TH	2	pyramidal	2	170	420.154	Point 9	477.384	-16.023	421.564	no cnx
2020_10_30_exp2_TH	2	pyramidal	2	170	420.154	Point 8	483.786	23.178	421.564	no cnx
2020_10_30_exp1_TH	1	pyramidal	2	327	373.424	Point 5	486.765	140.901	411.284	no cnx
2020_10_30_exp1_TH	1	pyramidal	2	327	373.424	Point 4	524.006	160.249	398.764	no cnx
2020_10_30_exp1_TH	1	pyramidal	2	327	373.424	Point 6	526.247	41.2529	411.284	no cnx
2020_10_30_exp1_TH	1	pyramidal	2	327	373.424	Point 1	544.989	0.0508581	398.764	no cnx
2020_10_30_exp1_TH	1	pyramidal	2	327	373.424	Point 3	532.547	-1.8896	398.764	no cnx
2020_10_30_exp1_TH	1	pyramidal	2	327	373.424	Point 2	471.226	122.256	392.674	inhibitory
2020_10_22_exp3_TH	2	pyramidal	2	112	344.994	Point 5	437.604	-21.1705	354.034	no cnx
2020_10_22_exp3_TH	2	pyramidal	2	112	344.994	Point 4	439.378	-7.19567	373.184	no cnx
2020_10_22_exp3_TH	2	pyramidal	2	112	344.994	Point 7	434.41	-261.791	375.454	no cnx
2020_10_22_exp3_TH	2	pyramidal	2	112	344.994	Point 6	444.665	-154.38	383.124	no cnx
2020_10_22_exp3_TH	2	pyramidal	2	112	344.994	Point 1	327.044	-82.2431	373.184	no cnx
2020_10_22_exp3_TH	2	pyramidal	2	112	344.994	Point 3	403.308	-38.3526	373.184	no cnx
2020_10_22_exp3_TH	2	pyramidal	2	112	344.994	Point 2	495.56	-56.4506	373.184	no cnx
2020_10_22_exp3_TH	2	pyramidal	2	112	344.994	Point 9	567.416	-193.025	375.454	no cnx
2020_10_22_exp3_TH	2	pyramidal	2	112	344.994	Point 8	561.334	-307.445	375.454	no cnx
2020_10_22_exp3_TH	2	pyramidal	2	112	344.994	Point 11	529.712	-349.169	343.054	no cnx
2020_10_22_exp3_TH	2	pyramidal	2	112	344.994	Point 10	550.85	-186.747	375.454	no cnx
2020_10_22_exp3_TH	2	pyramidal	2	112	344.994	Point 13	460.566	-235.37	343.054	inhibitory
2020_10_22_exp3_TH	2	pyramidal	2	112	344.994	Point 12	455.482	-312.814	343.054	no cnx
2020_10_22_exp3_TH	2	pyramidal	2	112	344.994	Point 15	428.218	-173.779	322.574	no cnx
2020_10_22_exp3_TH	2	pyramidal	2	112	344.994	Point 14	458.779	-301.169	322.574	no cnx
2020_10_22_exp3_TH	2	pyramidal	2	112	344.994	Point 16	444.701	36.6974	353.954	no cnx
2020_10_22_exp3_TH	1	pyramidal	2	132	359.664	Point 5	433.484	133.264	354.034	no cnx
2020_10_22_exp3_TH	1	pyramidal	2	132	359.664	Point 4	435.259	147.239	373.184	no cnx
2020_10_22_exp3_TH	1	pyramidal	2	132	359.664	Point 7	430.291	-107.357	375.454	no cnx
2020_10_22_exp3_TH	1	pyramidal	2	132	359.664	Point 6	440.545	0.0550348	383.124	no cnx
2020_10_22_exp3_TH	1	pyramidal	2	132	359.664	Point 1	322.925	72.1917	373.184	no cnx
2020_10_22_exp3_TH	1	pyramidal	2	132	359.664	Point 3	399.189	116.082	373.184	no cnx
2020_10_22_exp3_TH	1	pyramidal	2	132	359.664	Point 2	491.441	97.9842	373.184	no cnx
2020_10_22_exp3_TH	1	pyramidal	2	132	359.664	Point 9	563.297	-38.5901	375.454	no cnx
2020_10_22_exp3_TH	1	pyramidal	2	132	359.664	Point 8	557.215	-153.01	375.454	no cnx
2020_10_22_exp3_TH	1	pyramidal	2	132	359.664	Point 11	525.593	-194.734	343.054	no cnx
2020_10_22_exp3_TH	1	pyramidal	2	132	359.664	Point 10	546.731	-32.3124	375.454	no cnx
2020_10_22_exp3_TH	1	pyramidal	2	132	359.664	Point 13	456.447	-80.9355	343.054	no cnx
2020_10_22_exp3_TH	1	pyramidal	2	132	359.664	Point 12	451.363	-158.38	343.054	no cnx
2020_10_22_exp3_TH	1	pyramidal	2	132	359.664	Point 15	424.099	-19.3446	322.574	no cnx
2020_10_22_exp3_TH	1	pyramidal	2	132	359.664	Point 14	454.659	-146.734	322.574	no cnx
2020_10_22_exp3_TH	1	pyramidal	2	132	359.664	Point 16	440.582	191.132	353.954	no cnx
2020_10_22_exp2_TH	2	pyramidal	2	151	339.784	Point 1	239.956	-184.786	381.354	no cnx
2020_10_22_exp2_TH	2	pyramidal	2	151	339.784	Point 3	414.191	-209.211	353.564	no cnx
2020_10_22_exp2_TH	2	pyramidal	2	151	339.784	Point 2	386.616	-139.694	381.354	no cnx
2020_10_22_exp2_TH	1	pyramidal	2	177	365.145	Point 1	236.433	-96.8553	381.354	inhibitory
2020_10_22_exp2_TH	1	pyramidal	2	177	365.145	Point 2	383.092	-51.7634	381.354	no cnx
2020_09_04_exp2_TH	3	pyramidal	2	196	-106.816	Point 5	173.274	-133.72	-90.046	no cnx
2020_09_04_exp2_TH	3	pyramidal	2	196	-106.816	Point 4	159.786	102.129	-138.696	no cnx
2020_09_04_exp2_TH	3	pyramidal	2	196	-106.816	Point 7	382.56	587.996	-132.776	no cnx
2020_09_04_exp2_TH	3	pyramidal	2	196	-106.816	Point 6	247.955	-152.594	-123.216	no cnx
2020_09_04_exp2_TH	3	pyramidal	2	196	-106.816	Point 1	226.737	377.688	-89.386	no cnx
2020_09_04_exp2_TH	3	pyramidal	2	196	-106.816	Point 3	137.633	143.267	-120.306	no cnx
2020_09_04_exp2_TH	3	pyramidal	2	196	-106.816	Point 2	227.634	323.215	-141.586	no cnx
2020_09_04_exp2_TH	3	pyramidal	2	196	-106.816	Point 9	280.211	478.745	-143.276	no cnx
2020_09_04_exp2_TH	3	pyramidal	2	196	-106.816	Point 8	280.767	503.968	-143.276	no cnx
2020_09_04_exp2_TH	3	pyramidal	2	196	-106.816	Point 11	479.527	383.865	-43.326	no cnx
2020_09_04_exp2_TH	3	pyramidal	2	196	-106.816	Point 10	547.987	273.821	-33.706	no cnx
2020_09_04_exp2_TH	3	pyramidal	2	196	-106.816	Point 13	472.577	240.633	-72.836	no cnx
2020_09_04_exp2_TH	3	pyramidal	2	196	-106.816	Point 12	529.614	426.388	-72.836	no cnx
2020_09_04_exp2_TH	3	pyramidal	2	196	-106.816	Point 15	434.741	143.786	-82.406	inhibitory
2020_09_04_exp2_TH	3	pyramidal	2	196	-106.816	Point 14	434.643	223.23	-82.406	no cnx
2020_09_04_exp2_TH	3	pyramidal	2	196	-106.816	Point 17	488.005	80.1977	-43.266	no cnx
2020_09_04_exp2_TH	3	pyramidal	2	196	-106.816	Point 16	424.112	111.105	-43.266	no cnx
2020_09_04_exp2_TH	3	pyramidal	2	196	-106.816	Point 19	364.244	-49.3435	-65.926	no cnx
2020_09_04_exp2_TH	3	pyramidal	2	196	-106.816	Point 18	470.473	2.52113	-53.816	no cnx
2020_09_04_exp2_TH	3	pyramidal	2	196	-106.816	Point 20	519.109	146.627	-65.926	no cnx
2020_09_04_exp2_TH	2	pyramidal	2	153	-123.386	Point 5	175.781	-225.081	-90.046	no cnx
2020_09_04_exp2_TH	2	pyramidal	2	153	-123.386	Point 4	162.294	10.7675	-138.696	no cnx
2020_09_04_exp2_TH	2	pyramidal	2	153	-123.386	Point 7	385.067	496.635	-132.776	no cnx
2020_09_04_exp2_TH	2	pyramidal	2	153	-123.386	Point 6	250.462	-243.956	-123.216	no cnx
2020_09_04_exp2_TH	2	pyramidal	2	153	-123.386	Point 1	229.245	286.326	-89.386	no cnx
2020_09_04_exp2_TH	2	pyramidal	2	153	-123.386	Point 3	140.14	51.9061	-120.306	no cnx
2020_09_04_exp2_TH	2	pyramidal	2	153	-123.386	Point 2	230.142	231.854	-141.586	no cnx
2020_09_04_exp2_TH	2	pyramidal	2	153	-123.386	Point 9	282.718	387.384	-143.276	no cnx
2020_09_04_exp2_TH	2	pyramidal	2	153	-123.386	Point 8	283.274	412.607	-143.276	no cnx
2020_09_04_exp2_TH	2	pyramidal	2	153	-123.386	Point 11	482.034	292.504	-43.326	no cnx
2020_09_04_exp2_TH	2	pyramidal	2	153	-123.386	Point 10	550.494	182.46	-33.706	no cnx
2020_09_04_exp2_TH	2	pyramidal	2	153	-123.386	Point 13	475.084	149.272	-72.836	no cnx
2020_09_04_exp2_TH	2	pyramidal	2	153	-123.386	Point 12	532.122	335.027	-72.836	no cnx
2020_09_04_exp2_TH	2	pyramidal	2	153	-123.386	Point 15	437.248	52.4243	-82.406	inhibitory
2020_09_04_exp2_TH	2	pyramidal	2	153	-123.386	Point 14	437.15	131.869	-82.406	no cnx
2020_09_04_exp2_TH	2	pyramidal	2	153	-123.386	Point 17	490.512	-11.1636	-43.266	no cnx
2020_09_04_exp2_TH	2	pyramidal	2	153	-123.386	Point 16	426.619	19.7439	-43.266	no cnx
2020_09_04_exp2_TH	2	pyramidal	2	153	-123.386	Point 19	366.752	-140.705	-65.926	no cnx
2020_09_04_exp2_TH	2	pyramidal	2	153	-123.386	Point 18	472.981	-88.8402	-53.816	no cnx
2020_09_04_exp2_TH	2	pyramidal	2	153	-123.386	Point 20	521.616	55.2657	-65.926	no cnx
2020_08_27_exp1_TH	3	pyramidal	2	199	-91.2058	Point 5	547.207	30.2012	-104.136	no cnx
2020_08_27_exp1_TH	3	pyramidal	2	199	-91.2058	Point 4	578.235	86.5515	-99.136	no cnx
2020_08_27_exp1_TH	3	pyramidal	2	199	-91.2058	Point 6	503.733	87.0755	-104.136	no cnx
2020_08_27_exp1_TH	3	pyramidal	2	199	-91.2058	Point 1	668.209	95.8507	-95.726	no cnx
2020_08_27_exp1_TH	3	pyramidal	2	199	-91.2058	Point 3	642.702	128.226	-95.726	no cnx
2020_08_27_exp1_TH	3	pyramidal	2	199	-91.2058	Point 2	645.019	19.2786	-95.726	no cnx
2020_08_20_exp3_TH	3	pyramidal	2	235	-76.9459	Point 11	191.26	10.627	-56.296	no cnx
2020_08_20_exp3_TH	3	pyramidal	2	235	-76.9459	Point 10	150.62	160.705	-99.106	no cnx
2020_08_20_exp3_TH	3	pyramidal	2	235	-76.9459	Point 13	556.214	29.3325	-69.836	no cnx
2020_08_20_exp3_TH	3	pyramidal	2	235	-76.9459	Point 12	495.94	2.09503	-69.836	no cnx
2020_08_20_exp3_TH	3	pyramidal	2	235	-76.9459	Point 15	529.569	-20.8973	-70.456	no cnx
2020_08_20_exp3_TH	3	pyramidal	2	235	-76.9459	Point 14	524.738	99.7726	-69.836	no cnx
2020_08_20_exp3_TH	3	pyramidal	2	235	-76.9459	Point 17	365.18	172.768	-76.126	no cnx
2020_08_20_exp3_TH	3	pyramidal	2	235	-76.9459	Point 16	568.93	138.793	-70.456	no cnx
2020_08_20_exp3_TH	3	pyramidal	2	235	-76.9459	Point 19	461.164	158.694	-76.126	no cnx
2020_08_20_exp3_TH	3	pyramidal	2	235	-76.9459	Point 18	494.112	177.724	-76.126	no cnx
2020_08_20_exp3_TH	3	pyramidal	2	235	-76.9459	Point 31	483.019	-252.707	-111.856	no cnx
2020_08_20_exp3_TH	3	pyramidal	2	235	-76.9459	Point 30	634.211	-20.4429	-111.856	no cnx
2020_08_20_exp3_TH	3	pyramidal	2	235	-76.9459	Point 34	606.996	12.8588	-119.016	no cnx
2020_08_20_exp3_TH	3	pyramidal	2	235	-76.9459	Point 5	257.519	212.103	-70.026	no cnx
2020_08_20_exp3_TH	3	pyramidal	2	235	-76.9459	Point 4	293.132	-161.201	-123.326	no cnx
2020_08_20_exp3_TH	3	pyramidal	2	235	-76.9459	Point 7	152.917	314.135	-91.546	no cnx
2020_08_20_exp3_TH	3	pyramidal	2	235	-76.9459	Point 6	194.872	299.129	-70.026	no cnx
2020_08_20_exp3_TH	3	pyramidal	2	235	-76.9459	Point 3	226.951	-145.773	-63.436	no cnx
2020_08_20_exp3_TH	3	pyramidal	2	235	-76.9459	Point 9	338.439	235.589	-91.526	no cnx
2020_08_20_exp3_TH	3	pyramidal	2	235	-76.9459	Point 8	268.512	194.199	-91.546	no cnx
2020_08_20_exp3_TH	3	pyramidal	2	235	-76.9459	Point 32	569.039	-113.965	-119.016	no cnx
2020_08_20_exp3_TH	3	pyramidal	2	235	-76.9459	Point 28	576.672	-223.32	-111.856	no cnx
2020_08_20_exp3_TH	3	pyramidal	2	235	-76.9459	Point 29	615.773	-124.917	-111.856	no cnx
2020_08_20_exp3_TH	3	pyramidal	2	235	-76.9459	Point 20	407.697	-42.6319	-86.976	no cnx
2020_08_20_exp3_TH	3	pyramidal	2	235	-76.9459	Point 21	546.967	-63.7124	-86.976	no cnx
2020_08_20_exp3_TH	3	pyramidal	2	235	-76.9459	Point 22	456.446	-131.082	-86.976	no cnx
2020_08_20_exp3_TH	3	pyramidal	2	235	-76.9459	Point 23	604.85	29.8524	-86.976	no cnx
2020_08_20_exp3_TH	3	pyramidal	2	235	-76.9459	Point 24	497.285	49.1636	-86.976	inhibitory
2020_08_20_exp3_TH	3	pyramidal	2	235	-76.9459	Point 25	409.537	20.2256	-94.456	inhibitory
2020_08_20_exp3_TH	3	pyramidal	2	235	-76.9459	Point 26	466.679	78.2835	-94.456	no cnx
2020_08_20_exp3_TH	3	pyramidal	2	235	-76.9459	Point 27	529.257	-113.494	-111.856	no cnx
2020_08_20_exp3_TH	3	pyramidal	2	235	-76.9459	Point 33	687.348	-103.177	-119.016	no cnx
2020_08_20_exp3_TH	2	pyramidal	2	163	-89.3958	Point 11	186.438	99.5067	-56.296	no cnx
2020_08_20_exp3_TH	2	pyramidal	2	163	-89.3958	Point 10	145.799	249.584	-99.106	inhibitory
2020_08_20_exp3_TH	2	pyramidal	2	163	-89.3958	Point 13	551.393	118.212	-69.836	no cnx
2020_08_20_exp3_TH	2	pyramidal	2	163	-89.3958	Point 12	491.118	90.9747	-69.836	no cnx
2020_08_20_exp3_TH	2	pyramidal	2	163	-89.3958	Point 15	524.747	67.9823	-70.456	no cnx
2020_08_20_exp3_TH	2	pyramidal	2	163	-89.3958	Point 14	519.917	188.652	-69.836	no cnx
2020_08_20_exp3_TH	2	pyramidal	2	163	-89.3958	Point 17	360.358	261.647	-76.126	no cnx
2020_08_20_exp3_TH	2	pyramidal	2	163	-89.3958	Point 16	564.108	227.672	-70.456	no cnx
2020_08_20_exp3_TH	2	pyramidal	2	163	-89.3958	Point 19	456.343	247.573	-76.126	no cnx
2020_08_20_exp3_TH	2	pyramidal	2	163	-89.3958	Point 18	489.29	266.604	-76.126	no cnx
2020_08_20_exp3_TH	2	pyramidal	2	163	-89.3958	Point 31	478.197	-163.827	-111.856	no cnx
2020_08_20_exp3_TH	2	pyramidal	2	163	-89.3958	Point 30	629.39	68.4368	-111.856	no cnx
2020_08_20_exp3_TH	2	pyramidal	2	163	-89.3958	Point 34	602.174	101.739	-119.016	no cnx
2020_08_20_exp3_TH	2	pyramidal	2	163	-89.3958	Point 5	252.698	300.983	-70.026	no cnx
2020_08_20_exp3_TH	2	pyramidal	2	163	-89.3958	Point 4	288.311	-72.3209	-123.326	inhibitory
2020_08_20_exp3_TH	2	pyramidal	2	163	-89.3958	Point 7	148.095	403.015	-91.546	no cnx
2020_08_20_exp3_TH	2	pyramidal	2	163	-89.3958	Point 6	190.05	388.008	-70.026	no cnx
2020_08_20_exp3_TH	2	pyramidal	2	163	-89.3958	Point 3	222.13	-56.8937	-63.436	inhibitory
2020_08_20_exp3_TH	2	pyramidal	2	163	-89.3958	Point 9	333.617	324.469	-91.526	no cnx
2020_08_20_exp3_TH	2	pyramidal	2	163	-89.3958	Point 8	263.69	283.078	-91.546	no cnx
2020_08_20_exp3_TH	2	pyramidal	2	163	-89.3958	Point 32	564.217	-25.0849	-119.016	no cnx
2020_08_20_exp3_TH	2	pyramidal	2	163	-89.3958	Point 28	571.85	-134.44	-111.856	no cnx
2020_08_20_exp3_TH	2	pyramidal	2	163	-89.3958	Point 29	610.951	-36.037	-111.856	no cnx
2020_08_20_exp3_TH	2	pyramidal	2	163	-89.3958	Point 20	402.876	46.2478	-86.976	no cnx
2020_08_20_exp3_TH	2	pyramidal	2	163	-89.3958	Point 21	542.145	25.1673	-86.976	no cnx
2020_08_20_exp3_TH	2	pyramidal	2	163	-89.3958	Point 22	451.625	-42.202	-86.976	no cnx
2020_08_20_exp3_TH	2	pyramidal	2	163	-89.3958	Point 23	600.029	118.732	-86.976	no cnx
2020_08_20_exp3_TH	2	pyramidal	2	163	-89.3958	Point 24	492.463	138.043	-86.976	no cnx
2020_08_20_exp3_TH	2	pyramidal	2	163	-89.3958	Point 25	404.715	109.105	-94.456	inhibitory
2020_08_20_exp3_TH	2	pyramidal	2	163	-89.3958	Point 26	461.857	167.163	-94.456	no cnx
2020_08_20_exp3_TH	2	pyramidal	2	163	-89.3958	Point 27	524.436	-24.6141	-111.856	no cnx
2020_08_20_exp3_TH	2	pyramidal	2	163	-89.3958	Point 33	682.527	-14.2974	-119.016	no cnx
2020_08_20_exp1_TH	2	pyramidal	2	216	-82.376	Point 1	342.599	-132.088	-80.766	inhibitory
2020_08_13_exp2_TH	1	pyramidal	2	174	-72.076	Point 5	335.528	188.188	-106.386	no cnx
2020_08_13_exp2_TH	1	pyramidal	2	174	-72.076	Point 4	182.524	261.453	-89.566	no cnx
2020_08_13_exp2_TH	1	pyramidal	2	174	-72.076	Point 1	197.737	138.837	-47.236	no cnx
2020_08_13_exp2_TH	1	pyramidal	2	174	-72.076	Point 3	255.473	30.6854	-69.756	no cnx
2020_08_13_exp2_TH	1	pyramidal	2	174	-72.076	Point 2	308.706	158.678	-41.966	no cnx
2020_08_13_exp1_TH	1	pyramidal	2	173	-38.336	Point 5	61.9787	-28.4877	-62.316	no cnx
2020_08_13_exp1_TH	1	pyramidal	2	173	-38.336	Point 4	124.315	-80.2702	-52.996	no cnx
2020_08_13_exp1_TH	1	pyramidal	2	173	-38.336	Point 7	389.715	-90.0175	-18.996	inhibitory
2020_08_13_exp1_TH	1	pyramidal	2	173	-38.336	Point 6	258.795	-103.667	-18.996	no cnx
2020_08_13_exp1_TH	1	pyramidal	2	173	-38.336	Point 1	92.1066	29.7206	-9.776	no cnx
2020_08_13_exp1_TH	1	pyramidal	2	173	-38.336	Point 3	175.762	144.421	-28.606	no cnx
2020_08_13_exp1_TH	1	pyramidal	2	173	-38.336	Point 2	129.34	111.761	-18.456	no cnx
2020_08_13_exp1_TH	1	pyramidal	2	173	-38.336	Point 9	410.483	80.4953	-27.606	no cnx
2020_08_13_exp1_TH	1	pyramidal	2	173	-38.336	Point 8	297.85	91.4301	-27.606	no cnx
2020_08_13_exp1_TH	1	pyramidal	2	173	-38.336	Point 10	326.721	64.9067	-27.606	inhibitory
2020_08_02_exp3_TH	3	pyramidal	2	213	167.464	Point 5	367.344	-67.5536	157.764	no cnx
2020_08_02_exp3_TH	3	pyramidal	2	213	167.464	Point 4	340.106	127.245	157.764	no cnx
2020_08_02_exp3_TH	3	pyramidal	2	213	167.464	Point 7	375.583	103.591	144.644	no cnx
2020_08_02_exp3_TH	3	pyramidal	2	213	167.464	Point 6	430.177	1.63937	144.644	no cnx
2020_08_02_exp3_TH	3	pyramidal	2	213	167.464	Point 1	235.297	153.973	188.434	no cnx
2020_08_02_exp3_TH	3	pyramidal	2	213	167.464	Point 3	187.608	113.131	157.764	no cnx
2020_08_02_exp3_TH	3	pyramidal	2	213	167.464	Point 2	248.181	67.1694	187.764	inhibitory
2020_08_02_exp3_TH	3	pyramidal	2	213	167.464	Point 9	356.251	-16.1217	144.644	no cnx
2020_08_02_exp3_TH	3	pyramidal	2	213	167.464	Point 8	388.276	47.1073	144.644	no cnx
2020_08_02_exp3_TH	3	pyramidal	2	213	167.464	Point 11	559.927	131.732	188.484	inhibitory
2020_08_02_exp3_TH	3	pyramidal	2	213	167.464	Point 10	452.068	25.9497	188.484	no cnx
2020_08_02_exp3_TH	3	pyramidal	2	213	167.464	Point 13	614.971	6.29182	188.484	no cnx
2020_08_02_exp3_TH	3	pyramidal	2	213	167.464	Point 12	534.416	30.0937	188.484	inhibitory
2020_08_02_exp2_TH	1	pyramidal	2	209	298.484	Point 5	317.192	-70.4411	324.754	no cnx
2020_08_02_exp2_TH	1	pyramidal	2	209	298.484	Point 4	361.839	-9.25794	329.504	no cnx
2020_08_02_exp2_TH	1	pyramidal	2	209	298.484	Point 7	309.047	133.258	316.054	no cnx
2020_08_02_exp2_TH	1	pyramidal	2	209	298.484	Point 6	248.427	16.86	301.354	inhibitory
2020_08_02_exp2_TH	1	pyramidal	2	209	298.484	Point 1	274.237	55.2632	351.234	no cnx
2020_08_02_exp2_TH	1	pyramidal	2	209	298.484	Point 3	198.027	132.028	329.504	no cnx
2020_08_02_exp2_TH	1	pyramidal	2	209	298.484	Point 2	198.794	-46.1794	340.374	no cnx
2020_08_02_exp2_TH	1	pyramidal	2	209	298.484	Point 9	273.819	137.525	310.554	no cnx
2020_08_02_exp2_TH	1	pyramidal	2	209	298.484	Point 8	157.612	-31.638	297.364	inhibitory
2020_08_02_exp1_TH	2	pyramidal	2	250	294.034	Point 5	400.353	109.375	307.684	no cnx
2020_08_02_exp1_TH	2	pyramidal	2	250	294.034	Point 4	335.79	170.016	319.424	inhibitory
2020_08_02_exp1_TH	2	pyramidal	2	250	294.034	Point 6	445.234	232.325	307.684	no cnx
2020_08_02_exp1_TH	2	pyramidal	2	250	294.034	Point 1	387.666	22.3641	322.024	inhibitory
2020_08_02_exp1_TH	2	pyramidal	2	250	294.034	Point 3	314.387	118.051	313.314	no cnx
2020_08_02_exp1_TH	2	pyramidal	2	250	294.034	Point 2	266.996	87.0472	313.314	no cnx
2020_07_02_exp2_TH	1	pyramidal	2	242	322	Point 5	454.924	-113.037	373.624	no cnx
2020_07_02_exp2_TH	1	pyramidal	2	242	322	Point 4	442.62	-25.554	373.624	no cnx
2020_07_02_exp2_TH	1	pyramidal	2	242	322	Point 6	406.306	-34.276	361.604	inhibitory
2020_07_02_exp2_TH	1	pyramidal	2	242	322	Point 1	312.937	-50.3215	382.694	no cnx
2020_07_02_exp2_TH	1	pyramidal	2	242	322	Point 3	437.642	-143.452	373.624	no cnx
2020_07_02_exp2_TH	1	pyramidal	2	242	322	Point 2	351.7	-59.4734	382.694	no cnx
2020_02_26_exp2_TH	1	pyramidal	2	216	-788.009	Point 11	303.069	-98.5817	-797.569	inhibitory
2020_02_26_exp2_TH	1	pyramidal	2	216	-788.009	Point 10	376.635	38.0654	-797.569	no cnx
2020_02_26_exp2_TH	1	pyramidal	2	216	-788.009	Point 13	466.163	-75.5936	-797.569	no cnx
2020_02_26_exp2_TH	1	pyramidal	2	216	-788.009	Point 12	328.131	105.945	-797.569	no cnx
2020_02_26_exp2_TH	1	pyramidal	2	216	-788.009	Point 15	461.61	-228.975	-766.939	no cnx
2020_02_26_exp2_TH	1	pyramidal	2	216	-788.009	Point 14	438.247	-288.251	-766.939	no cnx
2020_02_26_exp2_TH	1	pyramidal	2	216	-788.009	Point 17	291.807	-168.776	-766.939	no cnx
2020_02_26_exp2_TH	1	pyramidal	2	216	-788.009	Point 16	488.498	-163.206	-766.939	no cnx
2020_02_26_exp2_TH	1	pyramidal	2	216	-788.009	Point 19	401.216	-339.823	-771.979	no cnx
2020_02_26_exp2_TH	1	pyramidal	2	216	-788.009	Point 18	365.501	-161.138	-771.979	no cnx
2020_02_26_exp2_TH	1	pyramidal	2	216	-788.009	Point 31	509.719	-417.789	-795.109	no cnx
2020_02_26_exp2_TH	1	pyramidal	2	216	-788.009	Point 30	272.837	-474.979	-795.109	no cnx
2020_02_26_exp2_TH	1	pyramidal	2	216	-788.009	Point 37	381.608	-525.827	-803.219	no cnx
2020_02_26_exp2_TH	1	pyramidal	2	216	-788.009	Point 36	496.426	-521.017	-803.219	no cnx
2020_02_26_exp2_TH	1	pyramidal	2	216	-788.009	Point 35	303.342	-576.139	-803.219	no cnx
2020_02_26_exp2_TH	1	pyramidal	2	216	-788.009	Point 34	286.689	-439.257	-803.219	no cnx
2020_02_26_exp2_TH	1	pyramidal	2	216	-788.009	Point 5	333.002	-22.2741	-780.299	no cnx
2020_02_26_exp2_TH	1	pyramidal	2	216	-788.009	Point 4	419.99	73.2454	-780.299	no cnx
2020_02_26_exp2_TH	1	pyramidal	2	216	-788.009	Point 7	343.507	-136.597	-780.299	inhibitory
2020_02_26_exp2_TH	1	pyramidal	2	216	-788.009	Point 6	282.463	-92.3296	-780.299	no cnx
2020_02_26_exp2_TH	1	pyramidal	2	216	-788.009	Point 1	260.926	137.607	-772.689	no cnx
2020_02_26_exp2_TH	1	pyramidal	2	216	-788.009	Point 3	355.52	98.4947	-780.299	no cnx
2020_02_26_exp2_TH	1	pyramidal	2	216	-788.009	Point 2	359.824	-82.6245	-772.689	no cnx
2020_02_26_exp2_TH	1	pyramidal	2	216	-788.009	Point 9	329.001	40.0744	-797.569	no cnx
2020_02_26_exp2_TH	1	pyramidal	2	216	-788.009	Point 8	267.905	-102.932	-797.569	no cnx
2020_02_26_exp2_TH	1	pyramidal	2	216	-788.009	Point 32	445.656	-509.198	-795.109	no cnx
2020_02_26_exp2_TH	1	pyramidal	2	216	-788.009	Point 48	517.324	-388.635	-853.559	no cnx
2020_02_26_exp2_TH	1	pyramidal	2	216	-788.009	Point 42	400.995	-419.966	-838.359	no cnx
2020_02_26_exp2_TH	1	pyramidal	2	216	-788.009	Point 43	405.127	-530.182	-838.359	no cnx
2020_02_26_exp2_TH	1	pyramidal	2	216	-788.009	Point 40	466.445	-436.05	-827.549	no cnx
2020_02_26_exp2_TH	1	pyramidal	2	216	-788.009	Point 41	321.833	-538.473	-838.359	no cnx
2020_02_26_exp2_TH	1	pyramidal	2	216	-788.009	Point 46	327.694	-284.616	-853.559	no cnx
2020_02_26_exp2_TH	1	pyramidal	2	216	-788.009	Point 47	375.194	-188.814	-853.559	no cnx
2020_02_26_exp2_TH	1	pyramidal	2	216	-788.009	Point 44	379.15	-603.21	-838.359	no cnx
2020_02_26_exp2_TH	1	pyramidal	2	216	-788.009	Point 45	388.539	-277.914	-853.559	no cnx
2020_02_26_exp2_TH	1	pyramidal	2	216	-788.009	Point 28	495.471	-126.235	-803.839	no cnx
2020_02_26_exp2_TH	1	pyramidal	2	216	-788.009	Point 29	402.165	-455.993	-786.279	no cnx
2020_02_26_exp2_TH	1	pyramidal	2	216	-788.009	Point 20	268.252	-253.971	-776.269	no cnx
2020_02_26_exp2_TH	1	pyramidal	2	216	-788.009	Point 21	436.602	-164.405	-776.269	no cnx
2020_02_26_exp2_TH	1	pyramidal	2	216	-788.009	Point 22	483.264	-181.725	-797.549	no cnx
2020_02_26_exp2_TH	1	pyramidal	2	216	-788.009	Point 23	253.551	-336.398	-797.549	no cnx
2020_02_26_exp2_TH	1	pyramidal	2	216	-788.009	Point 24	403.251	-169.726	-803.839	no cnx
2020_02_26_exp2_TH	1	pyramidal	2	216	-788.009	Point 25	442.738	-239.613	-803.839	no cnx
2020_02_26_exp2_TH	1	pyramidal	2	216	-788.009	Point 26	481.01	-272.212	-803.839	no cnx
2020_02_26_exp2_TH	1	pyramidal	2	216	-788.009	Point 27	466.563	-104.46	-803.839	no cnx
2020_02_26_exp2_TH	1	pyramidal	2	216	-788.009	Point 39	434.032	-401.899	-827.549	no cnx
2020_02_26_exp2_TH	1	pyramidal	2	216	-788.009	Point 33	462.63	-477.761	-795.109	no cnx
2020_02_26_exp2_TH	1	pyramidal	2	216	-788.009	Point 38	549.008	-389.173	-827.549	no cnx
2020_02_26_exp2_TH	0	pyramidal	2	255	-781.979	Point 11	304.692	-180.36	-797.569	inhibitory
2020_02_26_exp2_TH	0	pyramidal	2	255	-781.979	Point 10	378.258	-43.7128	-797.569	no cnx
2020_02_26_exp2_TH	0	pyramidal	2	255	-781.979	Point 13	467.787	-157.372	-797.569	no cnx
2020_02_26_exp2_TH	0	pyramidal	2	255	-781.979	Point 12	329.754	24.1671	-797.569	inhibitory
2020_02_26_exp2_TH	0	pyramidal	2	255	-781.979	Point 15	463.233	-310.753	-766.939	no cnx
2020_02_26_exp2_TH	0	pyramidal	2	255	-781.979	Point 14	439.87	-370.029	-766.939	no cnx
2020_02_26_exp2_TH	0	pyramidal	2	255	-781.979	Point 17	293.43	-250.554	-766.939	no cnx
2020_02_26_exp2_TH	0	pyramidal	2	255	-781.979	Point 16	490.121	-244.985	-766.939	no cnx
2020_02_26_exp2_TH	0	pyramidal	2	255	-781.979	Point 19	402.839	-421.602	-771.979	no cnx
2020_02_26_exp2_TH	0	pyramidal	2	255	-781.979	Point 18	367.124	-242.916	-771.979	no cnx
2020_02_26_exp2_TH	0	pyramidal	2	255	-781.979	Point 31	511.342	-499.567	-795.109	no cnx
2020_02_26_exp2_TH	0	pyramidal	2	255	-781.979	Point 30	274.46	-556.758	-795.109	no cnx
2020_02_26_exp2_TH	0	pyramidal	2	255	-781.979	Point 37	383.231	-607.605	-803.219	no cnx
2020_02_26_exp2_TH	0	pyramidal	2	255	-781.979	Point 36	498.049	-602.795	-803.219	no cnx
2020_02_26_exp2_TH	0	pyramidal	2	255	-781.979	Point 35	304.965	-657.918	-803.219	no cnx
2020_02_26_exp2_TH	0	pyramidal	2	255	-781.979	Point 34	288.312	-521.035	-803.219	no cnx
2020_02_26_exp2_TH	0	pyramidal	2	255	-781.979	Point 5	334.625	-104.052	-780.299	no cnx
2020_02_26_exp2_TH	0	pyramidal	2	255	-781.979	Point 4	421.613	-8.53282	-780.299	no cnx
2020_02_26_exp2_TH	0	pyramidal	2	255	-781.979	Point 7	345.13	-218.375	-780.299	inhibitory
2020_02_26_exp2_TH	0	pyramidal	2	255	-781.979	Point 6	284.086	-174.108	-780.299	no cnx
2020_02_26_exp2_TH	0	pyramidal	2	255	-781.979	Point 1	262.549	55.8283	-772.689	no cnx
2020_02_26_exp2_TH	0	pyramidal	2	255	-781.979	Point 3	357.143	16.7165	-780.299	no cnx
2020_02_26_exp2_TH	0	pyramidal	2	255	-781.979	Point 2	361.447	-164.403	-772.689	no cnx
2020_02_26_exp2_TH	0	pyramidal	2	255	-781.979	Point 9	330.624	-41.7038	-797.569	no cnx
2020_02_26_exp2_TH	0	pyramidal	2	255	-781.979	Point 8	269.528	-184.711	-797.569	no cnx
2020_02_26_exp2_TH	0	pyramidal	2	255	-781.979	Point 32	447.279	-590.977	-795.109	no cnx
2020_02_26_exp2_TH	0	pyramidal	2	255	-781.979	Point 48	518.947	-470.413	-853.559	no cnx
2020_02_26_exp2_TH	0	pyramidal	2	255	-781.979	Point 42	402.618	-501.744	-838.359	no cnx
2020_02_26_exp2_TH	0	pyramidal	2	255	-781.979	Point 43	406.75	-611.96	-838.359	no cnx
2020_02_26_exp2_TH	0	pyramidal	2	255	-781.979	Point 40	468.069	-517.828	-827.549	no cnx
2020_02_26_exp2_TH	0	pyramidal	2	255	-781.979	Point 41	323.456	-620.251	-838.359	no cnx
2020_02_26_exp2_TH	0	pyramidal	2	255	-781.979	Point 46	329.317	-366.394	-853.559	no cnx
2020_02_26_exp2_TH	0	pyramidal	2	255	-781.979	Point 47	376.817	-270.592	-853.559	no cnx
2020_02_26_exp2_TH	0	pyramidal	2	255	-781.979	Point 44	380.773	-684.988	-838.359	no cnx
2020_02_26_exp2_TH	0	pyramidal	2	255	-781.979	Point 45	390.162	-359.692	-853.559	no cnx
2020_02_26_exp2_TH	0	pyramidal	2	255	-781.979	Point 28	497.095	-208.014	-803.839	no cnx
2020_02_26_exp2_TH	0	pyramidal	2	255	-781.979	Point 29	403.788	-537.771	-786.279	no cnx
2020_02_26_exp2_TH	0	pyramidal	2	255	-781.979	Point 20	269.875	-335.75	-776.269	no cnx
2020_02_26_exp2_TH	0	pyramidal	2	255	-781.979	Point 21	438.225	-246.183	-776.269	no cnx
2020_02_26_exp2_TH	0	pyramidal	2	255	-781.979	Point 22	484.887	-263.504	-797.549	no cnx
2020_02_26_exp2_TH	0	pyramidal	2	255	-781.979	Point 23	255.174	-418.176	-797.549	no cnx
2020_02_26_exp2_TH	0	pyramidal	2	255	-781.979	Point 24	404.874	-251.504	-803.839	no cnx
2020_02_26_exp2_TH	0	pyramidal	2	255	-781.979	Point 25	444.361	-321.391	-803.839	no cnx
2020_02_26_exp2_TH	0	pyramidal	2	255	-781.979	Point 26	482.633	-353.99	-803.839	no cnx
2020_02_26_exp2_TH	0	pyramidal	2	255	-781.979	Point 27	468.186	-186.238	-803.839	no cnx
2020_02_26_exp2_TH	0	pyramidal	2	255	-781.979	Point 39	435.655	-483.677	-827.549	no cnx
2020_02_26_exp2_TH	0	pyramidal	2	255	-781.979	Point 33	464.253	-559.539	-795.109	no cnx
2020_02_26_exp2_TH	0	pyramidal	2	255	-781.979	Point 38	550.631	-470.952	-827.549	no cnx
2020_02_25_exp1_TH	3	pyramidal	2	162	-897.169	Point 5	280.459	69.4962	-883.879	inhibitory
2020_02_25_exp1_TH	3	pyramidal	2	162	-897.169	Point 4	217.608	297.638	-873.319	no cnx
2020_02_25_exp1_TH	3	pyramidal	2	162	-897.169	Point 7	173.287	101.817	-894.499	no cnx
2020_02_25_exp1_TH	3	pyramidal	2	162	-897.169	Point 6	378.775	69.462	-883.879	inhibitory
2020_02_25_exp1_TH	3	pyramidal	2	162	-897.169	Point 1	291.004	307.508	-873.319	no cnx
2020_02_25_exp1_TH	3	pyramidal	2	162	-897.169	Point 3	384.658	122.629	-873.319	no cnx
2020_02_25_exp1_TH	3	pyramidal	2	162	-897.169	Point 2	315.451	170.942	-873.319	inhibitory
2020_02_25_exp1_TH	3	pyramidal	2	162	-897.169	Point 9	382.179	105.182	-894.499	no cnx
2020_02_25_exp1_TH	3	pyramidal	2	162	-897.169	Point 8	254.47	109.571	-894.499	inhibitory
2020_02_25_exp1_TH	1	pyramidal	2	137	-905.819	Point 51	670.326	109.883	-833.949	no cnx
2020_02_25_exp1_TH	1	pyramidal	2	137	-905.819	Point 50	644.375	151.168	-833.949	no cnx
2020_02_25_exp1_TH	1	pyramidal	2	137	-905.819	Point 11	284.212	17.7663	-934.749	inhibitory
2020_02_25_exp1_TH	1	pyramidal	2	137	-905.819	Point 10	274.07	45.7019	-934.749	inhibitory
2020_02_25_exp1_TH	1	pyramidal	2	137	-905.819	Point 13	242.837	-108.058	-951.969	no cnx
2020_02_25_exp1_TH	1	pyramidal	2	137	-905.819	Point 15	264.894	-142.273	-959.539	no cnx
2020_02_25_exp1_TH	1	pyramidal	2	137	-905.819	Point 14	249.565	-42.6548	-959.539	no cnx
2020_02_25_exp1_TH	1	pyramidal	2	137	-905.819	Point 17	274.584	-260.759	-871.369	no cnx
2020_02_25_exp1_TH	1	pyramidal	2	137	-905.819	Point 16	325.052	-292.678	-909.859	no cnx
2020_02_25_exp1_TH	1	pyramidal	2	137	-905.819	Point 19	374.228	-507.16	-897.589	no cnx
2020_02_25_exp1_TH	1	pyramidal	2	137	-905.819	Point 18	424.265	-411.435	-893.139	no cnx
2020_02_25_exp1_TH	1	pyramidal	2	137	-905.819	Point 31	235.37	-394.183	-953.279	no cnx
2020_02_25_exp1_TH	1	pyramidal	2	137	-905.819	Point 30	227.931	-363.689	-942.599	no cnx
2020_02_25_exp1_TH	1	pyramidal	2	137	-905.819	Point 36	346.601	77.386	-871.489	inhibitory
2020_02_25_exp1_TH	1	pyramidal	2	137	-905.819	Point 35	360.403	160.086	-871.489	inhibitory
2020_02_25_exp1_TH	1	pyramidal	2	137	-905.819	Point 34	153.375	-258.949	-969.879	no cnx
2020_02_25_exp1_TH	1	pyramidal	2	137	-905.819	Point 5	283.989	-129.797	-883.879	inhibitory
2020_02_25_exp1_TH	1	pyramidal	2	137	-905.819	Point 4	221.138	98.3447	-873.319	no cnx
2020_02_25_exp1_TH	1	pyramidal	2	137	-905.819	Point 7	176.817	-97.4766	-894.499	no cnx
2020_02_25_exp1_TH	1	pyramidal	2	137	-905.819	Point 6	382.305	-129.832	-883.879	no cnx
2020_02_25_exp1_TH	1	pyramidal	2	137	-905.819	Point 1	294.534	108.215	-873.319	inhibitory
2020_02_25_exp1_TH	1	pyramidal	2	137	-905.819	Point 3	388.188	-76.6652	-873.319	no cnx
2020_02_25_exp1_TH	1	pyramidal	2	137	-905.819	Point 2	318.981	-28.352	-873.319	inhibitory
2020_02_25_exp1_TH	1	pyramidal	2	137	-905.819	Point 9	385.709	-94.1112	-894.499	no cnx
2020_02_25_exp1_TH	1	pyramidal	2	137	-905.819	Point 8	257.999	-89.7223	-894.499	inhibitory
2020_02_25_exp1_TH	1	pyramidal	2	137	-905.819	Point 32	173.938	-223.217	-969.879	no cnx
2020_02_25_exp1_TH	1	pyramidal	2	137	-905.819	Point 48	671.134	250.376	-833.949	no cnx
2020_02_25_exp1_TH	1	pyramidal	2	137	-905.819	Point 49	623.487	251.416	-833.949	no cnx
2020_02_25_exp1_TH	1	pyramidal	2	137	-905.819	Point 42	419.936	35.6459	-896.539	no cnx
2020_02_25_exp1_TH	1	pyramidal	2	137	-905.819	Point 43	381.259	75.1407	-896.539	no cnx
2020_02_25_exp1_TH	1	pyramidal	2	137	-905.819	Point 40	480.255	119.643	-860.819	no cnx
2020_02_25_exp1_TH	1	pyramidal	2	137	-905.819	Point 41	475.775	61.9536	-876.849	no cnx
2020_02_25_exp1_TH	1	pyramidal	2	137	-905.819	Point 46	630.191	137.604	-833.949	no cnx
2020_02_25_exp1_TH	1	pyramidal	2	137	-905.819	Point 47	491.317	175.431	-833.949	no cnx
2020_02_25_exp1_TH	1	pyramidal	2	137	-905.819	Point 44	316.821	179.572	-896.539	no cnx
2020_02_25_exp1_TH	1	pyramidal	2	137	-905.819	Point 45	644.367	226.094	-833.949	no cnx
2020_02_25_exp1_TH	1	pyramidal	2	137	-905.819	Point 28	297.382	-501.758	-942.599	no cnx
2020_02_25_exp1_TH	1	pyramidal	2	137	-905.819	Point 29	313.877	-368.075	-942.599	no cnx
2020_02_25_exp1_TH	1	pyramidal	2	137	-905.819	Point 20	373.999	-449.053	-915.119	no cnx
2020_02_25_exp1_TH	1	pyramidal	2	137	-905.819	Point 21	292.177	-544.563	-925.479	no cnx
2020_02_25_exp1_TH	1	pyramidal	2	137	-905.819	Point 22	294.235	-477.178	-925.479	no cnx
2020_02_25_exp1_TH	1	pyramidal	2	137	-905.819	Point 23	376.774	-533.337	-925.479	no cnx
2020_02_25_exp1_TH	1	pyramidal	2	137	-905.819	Point 24	494.374	-496.833	-925.479	no cnx
2020_02_25_exp1_TH	1	pyramidal	2	137	-905.819	Point 25	136.304	-500.325	-926.899	no cnx
2020_02_25_exp1_TH	1	pyramidal	2	137	-905.819	Point 26	208.357	-305.12	-910.169	no cnx
2020_02_25_exp1_TH	1	pyramidal	2	137	-905.819	Point 39	472.229	94.2352	-860.819	inhibitory
2020_02_25_exp1_TH	1	pyramidal	2	137	-905.819	Point 33	276.803	-355.051	-969.879	no cnx
2020_02_25_exp1_TH	1	pyramidal	2	137	-905.819	Point 38	463.502	138.111	-860.819	no cnx
2020_02_19_exp1_TH	3	pyramidal	2	210	-576.969	Point 11	405.168	-237.687	-651.449	no cnx
2020_02_19_exp1_TH	3	pyramidal	2	210	-576.969	Point 10	398.271	-289.564	-651.449	no cnx
2020_02_19_exp1_TH	3	pyramidal	2	210	-576.969	Point 13	561.82	-225.109	-651.449	no cnx
2020_02_19_exp1_TH	3	pyramidal	2	210	-576.969	Point 12	535.148	-307.657	-651.449	no cnx
2020_02_19_exp1_TH	3	pyramidal	2	210	-576.969	Point 15	317.003	90.117	-565.809	no cnx
2020_02_19_exp1_TH	3	pyramidal	2	210	-576.969	Point 14	205.083	-17.2886	-602.459	no cnx
2020_02_19_exp1_TH	3	pyramidal	2	210	-576.969	Point 17	678.283	58.8901	-616.109	no cnx
2020_02_19_exp1_TH	3	pyramidal	2	210	-576.969	Point 16	603.121	-49.9459	-605.329	no cnx
2020_02_19_exp1_TH	3	pyramidal	2	210	-576.969	Point 19	723.849	-165.273	-623.749	no cnx
2020_02_19_exp1_TH	3	pyramidal	2	210	-576.969	Point 18	619.013	98.2823	-616.109	no cnx
2020_02_19_exp1_TH	3	pyramidal	2	210	-576.969	Point 31	767.744	-489.469	-621.129	no cnx
2020_02_19_exp1_TH	3	pyramidal	2	210	-576.969	Point 30	683.907	-329.36	-610.789	no cnx
2020_02_19_exp1_TH	3	pyramidal	2	210	-576.969	Point 37	781.049	-327.921	-633.889	no cnx
2020_02_19_exp1_TH	3	pyramidal	2	210	-576.969	Point 36	707.72	-291.104	-633.889	no cnx
2020_02_19_exp1_TH	3	pyramidal	2	210	-576.969	Point 35	714.029	-246.136	-621.129	no cnx
2020_02_19_exp1_TH	3	pyramidal	2	210	-576.969	Point 34	773.363	-471.882	-621.129	no cnx
2020_02_19_exp1_TH	3	pyramidal	2	210	-576.969	Point 5	201.908	-433.342	-638.979	no cnx
2020_02_19_exp1_TH	3	pyramidal	2	210	-576.969	Point 4	279.25	-424.549	-628.289	no cnx
2020_02_19_exp1_TH	3	pyramidal	2	210	-576.969	Point 7	388.051	-226.543	-638.979	no cnx
2020_02_19_exp1_TH	3	pyramidal	2	210	-576.969	Point 6	313.115	-285.535	-638.979	no cnx
2020_02_19_exp1_TH	3	pyramidal	2	210	-576.969	Point 1	208.964	-267.753	-603.839	no cnx
2020_02_19_exp1_TH	3	pyramidal	2	210	-576.969	Point 3	357.131	-386.021	-603.839	no cnx
2020_02_19_exp1_TH	3	pyramidal	2	210	-576.969	Point 2	378.471	-331.965	-603.839	no cnx
2020_02_19_exp1_TH	3	pyramidal	2	210	-576.969	Point 9	411.821	-414.511	-651.449	no cnx
2020_02_19_exp1_TH	3	pyramidal	2	210	-576.969	Point 8	458.134	-384.017	-651.449	no cnx
2020_02_19_exp1_TH	3	pyramidal	2	210	-576.969	Point 32	717.022	-358.158	-621.129	no cnx
2020_02_19_exp1_TH	3	pyramidal	2	210	-576.969	Point 42	767.759	-351.034	-645.349	no cnx
2020_02_19_exp1_TH	3	pyramidal	2	210	-576.969	Point 43	613.746	-420.945	-645.349	no cnx
2020_02_19_exp1_TH	3	pyramidal	2	210	-576.969	Point 40	766.09	-397.155	-645.349	no cnx
2020_02_19_exp1_TH	3	pyramidal	2	210	-576.969	Point 41	704.032	-371.95	-645.349	no cnx
2020_02_19_exp1_TH	3	pyramidal	2	210	-576.969	Point 44	781.744	-312.834	-645.349	no cnx
2020_02_19_exp1_TH	3	pyramidal	2	210	-576.969	Point 28	719.344	-429.886	-610.789	no cnx
2020_02_19_exp1_TH	3	pyramidal	2	210	-576.969	Point 29	825.946	-317.062	-610.789	no cnx
2020_02_19_exp1_TH	3	pyramidal	2	210	-576.969	Point 20	764.619	-200.589	-646.739	no cnx
2020_02_19_exp1_TH	3	pyramidal	2	210	-576.969	Point 21	750.774	-36.0829	-646.739	no cnx
2020_02_19_exp1_TH	3	pyramidal	2	210	-576.969	Point 22	788.877	-59.8493	-646.739	no cnx
2020_02_19_exp1_TH	3	pyramidal	2	210	-576.969	Point 23	711.738	-40.2228	-646.739	no cnx
2020_02_19_exp1_TH	3	pyramidal	2	210	-576.969	Point 24	638.212	-21.9052	-646.739	no cnx
2020_02_19_exp1_TH	3	pyramidal	2	210	-576.969	Point 25	733.502	45.9654	-651.799	no cnx
2020_02_19_exp1_TH	3	pyramidal	2	210	-576.969	Point 26	772.267	-98.2561	-651.799	no cnx
2020_02_19_exp1_TH	3	pyramidal	2	210	-576.969	Point 27	730.942	-105.965	-651.799	no cnx
2020_02_19_exp1_TH	3	pyramidal	2	210	-576.969	Point 39	760.294	-354.472	-633.889	no cnx
2020_02_19_exp1_TH	3	pyramidal	2	210	-576.969	Point 33	630.635	-354.217	-621.129	no cnx
2020_02_19_exp1_TH	3	pyramidal	2	210	-576.969	Point 38	903.683	-407.265	-633.889	no cnx
2020_02_19_exp1_TH	1	pyramidal	2	180	-603.078	Point 11	396.41	82.5385	-651.449	no cnx
2020_02_19_exp1_TH	1	pyramidal	2	180	-603.078	Point 10	389.514	30.6612	-651.449	no cnx
2020_02_19_exp1_TH	1	pyramidal	2	180	-603.078	Point 13	553.063	95.1162	-651.449	no cnx
2020_02_19_exp1_TH	1	pyramidal	2	180	-603.078	Point 12	526.391	12.5684	-651.449	no cnx
2020_02_19_exp1_TH	1	pyramidal	2	180	-603.078	Point 15	308.246	410.342	-565.809	no cnx
2020_02_19_exp1_TH	1	pyramidal	2	180	-603.078	Point 14	196.326	302.937	-602.459	no cnx
2020_02_19_exp1_TH	1	pyramidal	2	180	-603.078	Point 17	669.526	379.115	-616.109	no cnx
2020_02_19_exp1_TH	1	pyramidal	2	180	-603.078	Point 16	594.364	270.279	-605.329	no cnx
2020_02_19_exp1_TH	1	pyramidal	2	180	-603.078	Point 19	715.092	154.952	-623.749	no cnx
2020_02_19_exp1_TH	1	pyramidal	2	180	-603.078	Point 18	610.255	418.507	-616.109	no cnx
2020_02_19_exp1_TH	1	pyramidal	2	180	-603.078	Point 31	758.987	-169.244	-621.129	no cnx
2020_02_19_exp1_TH	1	pyramidal	2	180	-603.078	Point 30	675.15	-9.13473	-610.789	no cnx
2020_02_19_exp1_TH	1	pyramidal	2	180	-603.078	Point 37	772.292	-7.69581	-633.889	no cnx
2020_02_19_exp1_TH	1	pyramidal	2	180	-603.078	Point 36	698.963	29.1214	-633.889	no cnx
2020_02_19_exp1_TH	1	pyramidal	2	180	-603.078	Point 35	705.272	74.0891	-621.129	no cnx
2020_02_19_exp1_TH	1	pyramidal	2	180	-603.078	Point 34	764.606	-151.657	-621.129	no cnx
2020_02_19_exp1_TH	1	pyramidal	2	180	-603.078	Point 5	193.15	-113.117	-638.979	no cnx
2020_02_19_exp1_TH	1	pyramidal	2	180	-603.078	Point 4	270.493	-104.324	-628.289	no cnx
2020_02_19_exp1_TH	1	pyramidal	2	180	-603.078	Point 7	379.293	93.6825	-638.979	no cnx
2020_02_19_exp1_TH	1	pyramidal	2	180	-603.078	Point 6	304.357	34.6902	-638.979	no cnx
2020_02_19_exp1_TH	1	pyramidal	2	180	-603.078	Point 1	200.207	52.4718	-603.839	no cnx
2020_02_19_exp1_TH	1	pyramidal	2	180	-603.078	Point 3	348.374	-65.7961	-603.839	no cnx
2020_02_19_exp1_TH	1	pyramidal	2	180	-603.078	Point 2	369.714	-11.7401	-603.839	no cnx
2020_02_19_exp1_TH	1	pyramidal	2	180	-603.078	Point 9	403.063	-94.2861	-651.449	no cnx
2020_02_19_exp1_TH	1	pyramidal	2	180	-603.078	Point 8	449.377	-63.7918	-651.449	no cnx
2020_02_19_exp1_TH	1	pyramidal	2	180	-603.078	Point 32	708.265	-37.9333	-621.129	no cnx
2020_02_19_exp1_TH	1	pyramidal	2	180	-603.078	Point 42	759.002	-30.8089	-645.349	no cnx
2020_02_19_exp1_TH	1	pyramidal	2	180	-603.078	Point 43	604.989	-100.719	-645.349	no cnx
2020_02_19_exp1_TH	1	pyramidal	2	180	-603.078	Point 40	757.333	-76.93	-645.349	no cnx
2020_02_19_exp1_TH	1	pyramidal	2	180	-603.078	Point 41	695.275	-51.7253	-645.349	no cnx
2020_02_19_exp1_TH	1	pyramidal	2	180	-603.078	Point 44	772.987	7.39133	-645.349	no cnx
2020_02_19_exp1_TH	1	pyramidal	2	180	-603.078	Point 28	710.586	-109.661	-610.789	no cnx
2020_02_19_exp1_TH	1	pyramidal	2	180	-603.078	Point 29	817.188	3.16333	-610.789	no cnx
2020_02_19_exp1_TH	1	pyramidal	2	180	-603.078	Point 20	755.861	119.636	-646.739	no cnx
2020_02_19_exp1_TH	1	pyramidal	2	180	-603.078	Point 21	742.017	284.142	-646.739	no cnx
2020_02_19_exp1_TH	1	pyramidal	2	180	-603.078	Point 22	780.12	260.376	-646.739	no cnx
2020_02_19_exp1_TH	1	pyramidal	2	180	-603.078	Point 23	702.981	280.002	-646.739	no cnx
2020_02_19_exp1_TH	1	pyramidal	2	180	-603.078	Point 24	629.455	298.32	-646.739	no cnx
2020_02_19_exp1_TH	1	pyramidal	2	180	-603.078	Point 25	724.745	366.191	-651.799	no cnx
2020_02_19_exp1_TH	1	pyramidal	2	180	-603.078	Point 26	763.51	221.969	-651.799	no cnx
2020_02_19_exp1_TH	1	pyramidal	2	180	-603.078	Point 27	722.185	214.26	-651.799	no cnx
2020_02_19_exp1_TH	1	pyramidal	2	180	-603.078	Point 39	751.537	-34.2468	-633.889	no cnx
2020_02_19_exp1_TH	1	pyramidal	2	180	-603.078	Point 33	621.878	-33.9917	-621.129	no cnx
2020_02_19_exp1_TH	1	pyramidal	2	180	-603.078	Point 38	894.926	-87.0403	-633.889	no cnx
2019_05_23_exp2_TH	3	pyramidal	2	294	486.315	Point 11	500.08	109.408	486.655	inhibitory
2019_05_23_exp2_TH	3	pyramidal	2	294	486.315	Point 10	475	223.281	486.655	no cnx
2019_05_23_exp2_TH	3	pyramidal	2	294	486.315	Point 13	662.342	66.5443	486.655	no cnx
2019_05_23_exp2_TH	3	pyramidal	2	294	486.315	Point 12	488.969	243.577	486.655	no cnx
2019_05_23_exp2_TH	3	pyramidal	2	294	486.315	Point 15	491.323	124.493	482.235	no cnx
2019_05_23_exp2_TH	3	pyramidal	2	294	486.315	Point 14	564.136	53.1947	482.235	inhibitory
2019_05_23_exp2_TH	3	pyramidal	2	294	486.315	Point 17	535.201	133.668	482.235	inhibitory
2019_05_23_exp2_TH	3	pyramidal	2	294	486.315	Point 16	539.467	-15.521	482.235	inhibitory
2019_05_23_exp2_TH	3	pyramidal	2	294	486.315	Point 19	459.988	-60.1107	482.235	no cnx
2019_05_23_exp2_TH	3	pyramidal	2	294	486.315	Point 18	504.924	-62.8451	482.235	no cnx
2019_05_23_exp2_TH	3	pyramidal	2	294	486.315	Point 5	550.033	34.6639	511.115	no cnx
2019_05_23_exp2_TH	3	pyramidal	2	294	486.315	Point 4	614.4	46.0473	527.235	no cnx
2019_05_23_exp2_TH	3	pyramidal	2	294	486.315	Point 7	595.088	141.199	496.305	no cnx
2019_05_23_exp2_TH	3	pyramidal	2	294	486.315	Point 6	607.409	86.0464	496.305	no cnx
2019_05_23_exp2_TH	3	pyramidal	2	294	486.315	Point 1	473.746	168.192	527.235	inhibitory
2019_05_23_exp2_TH	3	pyramidal	2	294	486.315	Point 3	463.995	155.394	527.235	no cnx
2019_05_23_exp2_TH	3	pyramidal	2	294	486.315	Point 2	507.014	1.58378	527.235	no cnx
2019_05_23_exp2_TH	3	pyramidal	2	294	486.315	Point 9	585.153	186.156	496.305	no cnx
2019_05_23_exp2_TH	3	pyramidal	2	294	486.315	Point 8	438.431	193.838	496.305	no cnx
2019_05_23_exp2_TH	3	pyramidal	2	294	486.315	Point 20	555.094	17.2977	482.235	no cnx
2019_05_23_exp2_TH	3	pyramidal	2	294	486.315	Point 21	549.819	98.5674	482.235	no cnx
2019_05_23_exp2_TH	3	pyramidal	2	294	486.315	Point 22	514.97	205.126	476.165	no cnx
2019_05_23_exp2_TH	3	pyramidal	2	294	486.315	Point 23	532.564	40.5643	476.165	no cnx
2019_05_23_exp2_TH	3	pyramidal	2	294	486.315	Point 24	526.35	181.983	476.165	no cnx
2019_05_23_exp2_TH	3	pyramidal	2	294	486.315	Point 25	641.475	67.2391	476.165	no cnx
2019_05_23_exp1_TH	3	pyramidal	2	244	580.105	Point 5	317.601	-24.3451	610.415	inhibitory
2019_05_23_exp1_TH	3	pyramidal	2	244	580.105	Point 4	245.4	-26.4767	617.725	inhibitory
2019_05_23_exp1_TH	3	pyramidal	2	244	580.105	Point 7	245.255	-97.9423	610.415	no cnx
2019_05_23_exp1_TH	3	pyramidal	2	244	580.105	Point 6	228.147	-120.822	610.415	no cnx
2019_05_23_exp1_TH	3	pyramidal	2	244	580.105	Point 1	233.208	81.7689	617.725	no cnx
2019_05_23_exp1_TH	3	pyramidal	2	244	580.105	Point 3	204.876	-132.947	617.725	no cnx
2019_05_23_exp1_TH	3	pyramidal	2	244	580.105	Point 2	210.847	-16.1292	617.725	no cnx
2019_05_23_exp1_TH	3	pyramidal	2	244	580.105	Point 9	327.638	107.345	604.165	no cnx
2019_05_23_exp1_TH	3	pyramidal	2	244	580.105	Point 8	335.462	-39.3916	604.165	inhibitory
2019_05_23_exp1_TH	3	pyramidal	2	244	580.105	Point 11	339.514	-100.613	590.785	no cnx
2019_05_23_exp1_TH	3	pyramidal	2	244	580.105	Point 10	243.063	19.3651	590.785	no cnx
2019_05_23_exp1_TH	3	pyramidal	2	244	580.105	Point 13	173.879	-74.327	590.785	no cnx
2019_05_23_exp1_TH	3	pyramidal	2	244	580.105	Point 12	237.915	-26.6843	590.785	no cnx
2019_05_23_exp1_TH	3	pyramidal	2	244	580.105	Point 15	212.861	-287.417	633.745	no cnx
2019_05_23_exp1_TH	3	pyramidal	2	244	580.105	Point 14	94.6661	-25.6681	638.335	no cnx
2019_05_23_exp1_TH	3	pyramidal	2	244	580.105	Point 17	280.322	-260.499	633.745	no cnx
2019_05_23_exp1_TH	3	pyramidal	2	244	580.105	Point 16	261.738	-393.827	633.745	no cnx
2019_05_23_exp1_TH	3	pyramidal	2	244	580.105	Point 18	163.4	-285.056	633.745	no cnx
2019_05_17_exp1_TH	3	pyramidal	2	340	527.295	Point 11	485.66	-266.003	572.045	no cnx
2019_05_17_exp1_TH	3	pyramidal	2	340	527.295	Point 10	292.513	-137.32	572.045	inhibitory
2019_05_17_exp1_TH	3	pyramidal	2	340	527.295	Point 13	373.946	-186.832	572.045	no cnx
2019_05_17_exp1_TH	3	pyramidal	2	340	527.295	Point 12	452.171	-161.219	572.045	no cnx
2019_05_17_exp1_TH	3	pyramidal	2	340	527.295	Point 15	583.333	-158.42	572.045	no cnx
2019_05_17_exp1_TH	3	pyramidal	2	340	527.295	Point 14	486.483	-253.809	572.045	no cnx
2019_05_17_exp1_TH	3	pyramidal	2	340	527.295	Point 17	541.006	-101.402	562.075	no cnx
2019_05_17_exp1_TH	3	pyramidal	2	340	527.295	Point 16	473.632	-133.104	562.075	no cnx
2019_05_17_exp1_TH	3	pyramidal	2	340	527.295	Point 19	559.828	-62.3546	543.445	no cnx
2019_05_17_exp1_TH	3	pyramidal	2	340	527.295	Point 18	522.154	-130.309	543.445	no cnx
2019_05_17_exp1_TH	3	pyramidal	2	340	527.295	Point 31	249.323	-318.576	546.155	no cnx
2019_05_17_exp1_TH	3	pyramidal	2	340	527.295	Point 30	399.083	-226.05	546.155	no cnx
2019_05_17_exp1_TH	3	pyramidal	2	340	527.295	Point 37	358.156	-201.123	618.765	no cnx
2019_05_17_exp1_TH	3	pyramidal	2	340	527.295	Point 36	433.307	-208.44	618.765	no cnx
2019_05_17_exp1_TH	3	pyramidal	2	340	527.295	Point 35	333.126	-212.901	618.765	no cnx
2019_05_17_exp1_TH	3	pyramidal	2	340	527.295	Point 34	244.418	-318.151	618.765	no cnx
2019_05_17_exp1_TH	3	pyramidal	2	340	527.295	Point 5	190.762	10.8043	544.885	no cnx
2019_05_17_exp1_TH	3	pyramidal	2	340	527.295	Point 4	347.184	76.8197	544.885	no cnx
2019_05_17_exp1_TH	3	pyramidal	2	340	527.295	Point 7	329.426	-28.6905	534.045	no cnx
2019_05_17_exp1_TH	3	pyramidal	2	340	527.295	Point 6	331.373	2.5454	544.885	no cnx
2019_05_17_exp1_TH	3	pyramidal	2	340	527.295	Point 1	447.39	-62.1074	558.075	no cnx
2019_05_17_exp1_TH	3	pyramidal	2	340	527.295	Point 3	319.692	50.1847	558.075	no cnx
2019_05_17_exp1_TH	3	pyramidal	2	340	527.295	Point 2	416.645	19.653	558.075	no cnx
2019_05_17_exp1_TH	3	pyramidal	2	340	527.295	Point 9	414.493	-32.5653	534.045	no cnx
2019_05_17_exp1_TH	3	pyramidal	2	340	527.295	Point 8	376.948	24.312	534.045	no cnx
2019_05_17_exp1_TH	3	pyramidal	2	340	527.295	Point 32	408.591	-361.122	546.155	no cnx
2019_05_17_exp1_TH	3	pyramidal	2	340	527.295	Point 28	330.79	-269.538	546.155	no cnx
2019_05_17_exp1_TH	3	pyramidal	2	340	527.295	Point 29	457.92	-416.102	546.155	no cnx
2019_05_17_exp1_TH	3	pyramidal	2	340	527.295	Point 20	476.543	21.3006	534.045	no cnx
2019_05_17_exp1_TH	3	pyramidal	2	340	527.295	Point 21	501.68	-162.811	534.045	no cnx
2019_05_17_exp1_TH	3	pyramidal	2	340	527.295	Point 22	438.345	2.64334	525.285	inhibitory
2019_05_17_exp1_TH	3	pyramidal	2	340	527.295	Point 23	581.429	-23.899	521.005	no cnx
2019_05_17_exp1_TH	3	pyramidal	2	340	527.295	Point 24	477.709	-107.698	521.005	no cnx
2019_05_17_exp1_TH	3	pyramidal	2	340	527.295	Point 25	450.032	-124.617	521.005	no cnx
2019_05_17_exp1_TH	3	pyramidal	2	340	527.295	Point 26	419.089	-44.9829	514.605	no cnx
2019_05_17_exp1_TH	3	pyramidal	2	340	527.295	Point 27	556.014	123.852	514.605	no cnx
2019_05_17_exp1_TH	3	pyramidal	2	340	527.295	Point 39	570.368	-330.551	618.765	no cnx
2019_05_17_exp1_TH	3	pyramidal	2	340	527.295	Point 33	504.345	-409.99	546.155	no cnx
2019_05_17_exp1_TH	3	pyramidal	2	340	527.295	Point 38	480.921	-252.424	618.765	no cnx
2019_05_17_exp1_TH	2	pyramidal	2	308	517.705	Point 11	473.154	-190.349	572.045	no cnx
2019_05_17_exp1_TH	2	pyramidal	2	308	517.705	Point 10	280.008	-61.6662	572.045	no cnx
2019_05_17_exp1_TH	2	pyramidal	2	308	517.705	Point 13	361.441	-111.178	572.045	no cnx
2019_05_17_exp1_TH	2	pyramidal	2	308	517.705	Point 12	439.665	-85.5649	572.045	no cnx
2019_05_17_exp1_TH	2	pyramidal	2	308	517.705	Point 15	570.827	-82.7658	572.045	no cnx
2019_05_17_exp1_TH	2	pyramidal	2	308	517.705	Point 14	473.977	-178.155	572.045	no cnx
2019_05_17_exp1_TH	2	pyramidal	2	308	517.705	Point 17	528.501	-25.7477	562.075	no cnx
2019_05_17_exp1_TH	2	pyramidal	2	308	517.705	Point 16	461.126	-57.4503	562.075	inhibitory
2019_05_17_exp1_TH	2	pyramidal	2	308	517.705	Point 19	547.323	13.2996	543.445	no cnx
2019_05_17_exp1_TH	2	pyramidal	2	308	517.705	Point 18	509.649	-54.6552	543.445	no cnx
2019_05_17_exp1_TH	2	pyramidal	2	308	517.705	Point 31	236.818	-242.922	546.155	no cnx
2019_05_17_exp1_TH	2	pyramidal	2	308	517.705	Point 30	386.577	-150.396	546.155	no cnx
2019_05_17_exp1_TH	2	pyramidal	2	308	517.705	Point 37	345.65	-125.469	618.765	no cnx
2019_05_17_exp1_TH	2	pyramidal	2	308	517.705	Point 36	420.802	-132.786	618.765	no cnx
2019_05_17_exp1_TH	2	pyramidal	2	308	517.705	Point 35	320.62	-137.247	618.765	no cnx
2019_05_17_exp1_TH	2	pyramidal	2	308	517.705	Point 34	231.913	-242.497	618.765	no cnx
2019_05_17_exp1_TH	2	pyramidal	2	308	517.705	Point 5	178.256	86.4585	544.885	no cnx
2019_05_17_exp1_TH	2	pyramidal	2	308	517.705	Point 4	334.678	152.474	544.885	no cnx
2019_05_17_exp1_TH	2	pyramidal	2	308	517.705	Point 7	316.921	46.9637	534.045	no cnx
2019_05_17_exp1_TH	2	pyramidal	2	308	517.705	Point 6	318.867	78.1996	544.885	inhibitory
2019_05_17_exp1_TH	2	pyramidal	2	308	517.705	Point 1	434.885	13.5468	558.075	no cnx
2019_05_17_exp1_TH	2	pyramidal	2	308	517.705	Point 3	307.187	125.839	558.075	no cnx
2019_05_17_exp1_TH	2	pyramidal	2	308	517.705	Point 2	404.139	95.3072	558.075	no cnx
2019_05_17_exp1_TH	2	pyramidal	2	308	517.705	Point 9	401.988	43.0889	534.045	inhibitory
2019_05_17_exp1_TH	2	pyramidal	2	308	517.705	Point 8	364.442	99.9661	534.045	no cnx
2019_05_17_exp1_TH	2	pyramidal	2	308	517.705	Point 32	396.085	-285.468	546.155	no cnx
2019_05_17_exp1_TH	2	pyramidal	2	308	517.705	Point 28	318.284	-193.884	546.155	no cnx
2019_05_17_exp1_TH	2	pyramidal	2	308	517.705	Point 29	445.414	-340.447	546.155	no cnx
2019_05_17_exp1_TH	2	pyramidal	2	308	517.705	Point 20	464.037	96.9548	534.045	no cnx
2019_05_17_exp1_TH	2	pyramidal	2	308	517.705	Point 21	489.174	-87.1566	534.045	no cnx
2019_05_17_exp1_TH	2	pyramidal	2	308	517.705	Point 22	425.839	78.2975	525.285	inhibitory
2019_05_17_exp1_TH	2	pyramidal	2	308	517.705	Point 23	568.923	51.7551	521.005	no cnx
2019_05_17_exp1_TH	2	pyramidal	2	308	517.705	Point 24	465.203	-32.0442	521.005	no cnx
2019_05_17_exp1_TH	2	pyramidal	2	308	517.705	Point 25	437.526	-48.9627	521.005	no cnx
2019_05_17_exp1_TH	2	pyramidal	2	308	517.705	Point 26	406.584	30.6713	514.605	inhibitory
2019_05_17_exp1_TH	2	pyramidal	2	308	517.705	Point 27	543.508	199.506	514.605	no cnx
2019_05_17_exp1_TH	2	pyramidal	2	308	517.705	Point 39	557.862	-254.897	618.765	no cnx
2019_05_17_exp1_TH	2	pyramidal	2	308	517.705	Point 33	491.839	-334.336	546.155	no cnx
2019_05_17_exp1_TH	2	pyramidal	2	308	517.705	Point 38	468.416	-176.769	618.765	no cnx
2019_03_11_exp1_TH	1	pyramidal	2	258	66.5449	Point 11	660.155	47.5622	35.805	no cnx
2019_03_11_exp1_TH	1	pyramidal	2	258	66.5449	Point 10	574.639	23.8682	35.805	no cnx
2019_03_11_exp1_TH	1	pyramidal	2	258	66.5449	Point 13	750.112	98.8503	35.815	no cnx
2019_03_11_exp1_TH	1	pyramidal	2	258	66.5449	Point 12	588.299	54.6515	35.805	no cnx
2019_03_11_exp1_TH	1	pyramidal	2	258	66.5449	Point 5	641.645	-63.9594	70.475	no cnx
2019_03_11_exp1_TH	1	pyramidal	2	258	66.5449	Point 4	624.279	51.0612	70.475	no cnx
2019_03_11_exp1_TH	1	pyramidal	2	258	66.5449	Point 7	717.375	7.35627	70.475	no cnx
2019_03_11_exp1_TH	1	pyramidal	2	258	66.5449	Point 6	752.66	86.298	70.475	no cnx
2019_03_11_exp1_TH	1	pyramidal	2	258	66.5449	Point 1	619.551	-19.8355	91.925	no cnx
2019_03_11_exp1_TH	1	pyramidal	2	258	66.5449	Point 3	567.412	103.324	77.745	no cnx
2019_03_11_exp1_TH	1	pyramidal	2	258	66.5449	Point 2	626.409	-44.0228	84.845	no cnx
2019_03_11_exp1_TH	1	pyramidal	2	258	66.5449	Point 9	678.54	90.6566	63.795	no cnx
2019_03_11_exp1_TH	1	pyramidal	2	258	66.5449	Point 8	751.483	64.1278	70.475	no cnx
2019_03_05_exp1_TH	0	pyramidal	2	196	275.979	Point 11	489.153	165.622	252.119	no cnx
2019_03_05_exp1_TH	0	pyramidal	2	196	275.979	Point 10	483.141	168.851	259.719	no cnx
2019_03_05_exp1_TH	0	pyramidal	2	196	275.979	Point 13	363.498	3.55457	284.459	inhibitory
2019_03_05_exp1_TH	0	pyramidal	2	196	275.979	Point 12	537.569	139.75	252.119	no cnx
2019_03_05_exp1_TH	0	pyramidal	2	196	275.979	Point 15	395.898	164.658	284.459	no cnx
2019_03_05_exp1_TH	0	pyramidal	2	196	275.979	Point 14	498.611	64.5947	284.459	no cnx
2019_03_05_exp1_TH	0	pyramidal	2	196	275.979	Point 17	474.221	135.641	284.459	no cnx
2019_03_05_exp1_TH	0	pyramidal	2	196	275.979	Point 16	351.092	123.006	284.459	inhibitory
2019_03_05_exp1_TH	0	pyramidal	2	196	275.979	Point 19	341.256	73.5337	258.419	no cnx
2019_03_05_exp1_TH	0	pyramidal	2	196	275.979	Point 18	332.586	-64.8513	258.419	inhibitory
2019_03_05_exp1_TH	0	pyramidal	2	196	275.979	Point 31	448.066	-136.632	311.549	no cnx
2019_03_05_exp1_TH	0	pyramidal	2	196	275.979	Point 30	383.547	-208.01	311.549	no cnx
2019_03_05_exp1_TH	0	pyramidal	2	196	275.979	Point 36	470.512	-276.652	299.239	no cnx
2019_03_05_exp1_TH	0	pyramidal	2	196	275.979	Point 35	490.475	-178.126	299.239	no cnx
2019_03_05_exp1_TH	0	pyramidal	2	196	275.979	Point 34	321.026	-363.801	319.989	no cnx
2019_03_05_exp1_TH	0	pyramidal	2	196	275.979	Point 5	542.52	178.535	311.699	no cnx
2019_03_05_exp1_TH	0	pyramidal	2	196	275.979	Point 4	559.078	104.328	311.699	no cnx
2019_03_05_exp1_TH	0	pyramidal	2	196	275.979	Point 7	542.879	28.4368	298.829	no cnx
2019_03_05_exp1_TH	0	pyramidal	2	196	275.979	Point 6	604.201	167.307	298.829	no cnx
2019_03_05_exp1_TH	0	pyramidal	2	196	275.979	Point 1	483.705	213.16	311.699	no cnx
2019_03_05_exp1_TH	0	pyramidal	2	196	275.979	Point 3	489.541	192.261	311.699	no cnx
2019_03_05_exp1_TH	0	pyramidal	2	196	275.979	Point 2	513.007	137.619	311.699	no cnx
2019_03_05_exp1_TH	0	pyramidal	2	196	275.979	Point 9	517.229	17.0136	259.719	no cnx
2019_03_05_exp1_TH	0	pyramidal	2	196	275.979	Point 8	562.766	-8.49179	259.719	no cnx
2019_03_05_exp1_TH	0	pyramidal	2	196	275.979	Point 32	436.102	-90.8317	319.989	no cnx
2019_03_05_exp1_TH	0	pyramidal	2	196	275.979	Point 28	290.27	-204.95	350.789	no cnx
2019_03_05_exp1_TH	0	pyramidal	2	196	275.979	Point 29	319.823	-156.373	311.549	inhibitory
2019_03_05_exp1_TH	0	pyramidal	2	196	275.979	Point 20	390.887	-37.0587	246.279	inhibitory
2019_03_05_exp1_TH	0	pyramidal	2	196	275.979	Point 21	299.581	95.8572	246.279	inhibitory
2019_03_05_exp1_TH	0	pyramidal	2	196	275.979	Point 22	242.523	177.387	287.469	no cnx
2019_03_05_exp1_TH	0	pyramidal	2	196	275.979	Point 23	163.677	11.5309	305.439	no cnx
2019_03_05_exp1_TH	0	pyramidal	2	196	275.979	Point 24	191.221	-49.2959	305.439	no cnx
2019_03_05_exp1_TH	0	pyramidal	2	196	275.979	Point 25	239.728	48.1966	305.439	inhibitory
2019_03_05_exp1_TH	0	pyramidal	2	196	275.979	Point 26	245.154	148.065	305.439	no cnx
2019_03_05_exp1_TH	0	pyramidal	2	196	275.979	Point 27	308.423	226.552	305.439	no cnx
2019_03_05_exp1_TH	0	pyramidal	2	196	275.979	Point 33	364.262	-352.284	319.989	no cnx
2019_02_20_exp2_TH	3	pyramidal	2	293	600.5	Point 11	662.469	-89.1916	612.646	no cnx
2019_02_20_exp2_TH	3	pyramidal	2	293	600.5	Point 10	686.115	7.68929	612.646	no cnx
2019_02_20_exp2_TH	3	pyramidal	2	293	600.5	Point 13	726.25	17.4154	600.226	no cnx
2019_02_20_exp2_TH	3	pyramidal	2	293	600.5	Point 12	721.579	-45.0303	600.226	no cnx
2019_02_20_exp2_TH	3	pyramidal	2	293	600.5	Point 15	671.518	74.5633	600.226	no cnx
2019_02_20_exp2_TH	3	pyramidal	2	293	600.5	Point 14	588.655	82.1754	600.226	no cnx
2019_02_20_exp2_TH	3	pyramidal	2	293	600.5	Point 17	692.891	-62.7723	586.676	no cnx
2019_02_20_exp2_TH	3	pyramidal	2	293	600.5	Point 16	557.332	-4.02702	586.676	no cnx
2019_02_20_exp2_TH	3	pyramidal	2	293	600.5	Point 19	694.905	68.9664	586.676	no cnx
2019_02_20_exp2_TH	3	pyramidal	2	293	600.5	Point 18	683.386	47.4585	586.676	no cnx
2019_02_20_exp2_TH	3	pyramidal	2	293	600.5	Point 31	415.369	-93.6322	588.346	inhibitory
2019_02_20_exp2_TH	3	pyramidal	2	293	600.5	Point 30	283.944	10.3507	562.486	no cnx
2019_02_20_exp2_TH	3	pyramidal	2	293	600.5	Point 37	742.745	266.082	598.946	no cnx
2019_02_20_exp2_TH	3	pyramidal	2	293	600.5	Point 36	564.802	274.003	598.946	no cnx
2019_02_20_exp2_TH	3	pyramidal	2	293	600.5	Point 35	587.254	210.255	598.946	no cnx
2019_02_20_exp2_TH	3	pyramidal	2	293	600.5	Point 34	653.315	319.723	608.706	no cnx
2019_02_20_exp2_TH	3	pyramidal	2	293	600.5	Point 5	260.683	-115.677	515.026	no cnx
2019_02_20_exp2_TH	3	pyramidal	2	293	600.5	Point 4	219.903	-154.275	515.026	no cnx
2019_02_20_exp2_TH	3	pyramidal	2	293	600.5	Point 7	247.612	47.7197	515.026	no cnx
2019_02_20_exp2_TH	3	pyramidal	2	293	600.5	Point 6	229.118	-0.89167	515.026	inhibitory
2019_02_20_exp2_TH	3	pyramidal	2	293	600.5	Point 1	186.992	-153.769	559.536	no cnx
2019_02_20_exp2_TH	3	pyramidal	2	293	600.5	Point 3	323.929	-32.6162	541.716	inhibitory
2019_02_20_exp2_TH	3	pyramidal	2	293	600.5	Point 2	290.765	16.3946	559.536	inhibitory
2019_02_20_exp2_TH	3	pyramidal	2	293	600.5	Point 9	624.671	-82.9743	612.646	no cnx
2019_02_20_exp2_TH	3	pyramidal	2	293	600.5	Point 8	631.768	-25.7912	612.646	no cnx
2019_02_20_exp2_TH	3	pyramidal	2	293	600.5	Point 32	608.462	357.07	608.706	no cnx
2019_02_20_exp2_TH	3	pyramidal	2	293	600.5	Point 28	544.282	198.646	554.536	no cnx
2019_02_20_exp2_TH	3	pyramidal	2	293	600.5	Point 29	499.776	147.432	544.106	inhibitory
2019_02_20_exp2_TH	3	pyramidal	2	293	600.5	Point 20	520.73	291.802	572.086	no cnx
2019_02_20_exp2_TH	3	pyramidal	2	293	600.5	Point 21	593.078	195.94	572.096	no cnx
2019_02_20_exp2_TH	3	pyramidal	2	293	600.5	Point 22	574.847	139.376	572.096	no cnx
2019_02_20_exp2_TH	3	pyramidal	2	293	600.5	Point 23	501.357	203.001	572.096	no cnx
2019_02_20_exp2_TH	3	pyramidal	2	293	600.5	Point 24	407.332	182.919	572.096	no cnx
2019_02_20_exp2_TH	3	pyramidal	2	293	600.5	Point 25	541.852	280.887	572.096	no cnx
2019_02_20_exp2_TH	3	pyramidal	2	293	600.5	Point 26	479.927	84.3074	554.536	no cnx
2019_02_20_exp2_TH	3	pyramidal	2	293	600.5	Point 27	515.915	126.913	554.536	no cnx
2019_02_20_exp2_TH	3	pyramidal	2	293	600.5	Point 39	647.247	408.771	598.946	no cnx
2019_02_20_exp2_TH	3	pyramidal	2	293	600.5	Point 33	548.271	340.992	608.706	no cnx
2019_02_20_exp2_TH	3	pyramidal	2	293	600.5	Point 38	702.206	442.698	598.946	no cnx
2019_02_20_exp2_TH	2	pyramidal	2	215	559.5	Point 11	651.265	-44.35	612.646	no cnx
2019_02_20_exp2_TH	2	pyramidal	2	215	559.5	Point 10	674.911	52.5309	612.646	no cnx
2019_02_20_exp2_TH	2	pyramidal	2	215	559.5	Point 13	715.046	62.257	600.226	no cnx
2019_02_20_exp2_TH	2	pyramidal	2	215	559.5	Point 12	710.375	-0.188703	600.226	no cnx
2019_02_20_exp2_TH	2	pyramidal	2	215	559.5	Point 15	660.313	119.405	600.226	no cnx
2019_02_20_exp2_TH	2	pyramidal	2	215	559.5	Point 14	577.451	127.017	600.226	no cnx
2019_02_20_exp2_TH	2	pyramidal	2	215	559.5	Point 17	681.687	-17.9307	586.676	no cnx
2019_02_20_exp2_TH	2	pyramidal	2	215	559.5	Point 16	546.128	40.8146	586.676	no cnx
2019_02_20_exp2_TH	2	pyramidal	2	215	559.5	Point 19	683.701	113.808	586.676	no cnx
2019_02_20_exp2_TH	2	pyramidal	2	215	559.5	Point 18	672.182	92.3	586.676	no cnx
2019_02_20_exp2_TH	2	pyramidal	2	215	559.5	Point 31	404.165	-48.7907	588.346	inhibitory
2019_02_20_exp2_TH	2	pyramidal	2	215	559.5	Point 30	272.74	55.1922	562.486	no cnx
2019_02_20_exp2_TH	2	pyramidal	2	215	559.5	Point 37	731.541	310.924	598.946	no cnx
2019_02_20_exp2_TH	2	pyramidal	2	215	559.5	Point 36	553.598	318.844	598.946	no cnx
2019_02_20_exp2_TH	2	pyramidal	2	215	559.5	Point 35	576.05	255.096	598.946	no cnx
2019_02_20_exp2_TH	2	pyramidal	2	215	559.5	Point 34	642.111	364.565	608.706	no cnx
2019_02_20_exp2_TH	2	pyramidal	2	215	559.5	Point 5	249.479	-70.8359	515.026	inhibitory
2019_02_20_exp2_TH	2	pyramidal	2	215	559.5	Point 4	208.699	-109.433	515.026	inhibitory
2019_02_20_exp2_TH	2	pyramidal	2	215	559.5	Point 7	236.407	92.5612	515.026	no cnx
2019_02_20_exp2_TH	2	pyramidal	2	215	559.5	Point 6	217.914	43.9499	515.026	inhibitory
2019_02_20_exp2_TH	2	pyramidal	2	215	559.5	Point 1	175.788	-108.927	559.536	no cnx
2019_02_20_exp2_TH	2	pyramidal	2	215	559.5	Point 3	312.725	12.2254	541.716	inhibitory
2019_02_20_exp2_TH	2	pyramidal	2	215	559.5	Point 2	279.561	61.2361	559.536	inhibitory
2019_02_20_exp2_TH	2	pyramidal	2	215	559.5	Point 9	613.467	-38.1328	612.646	no cnx
2019_02_20_exp2_TH	2	pyramidal	2	215	559.5	Point 8	620.564	19.0503	612.646	no cnx
2019_02_20_exp2_TH	2	pyramidal	2	215	559.5	Point 32	597.258	401.911	608.706	no cnx
2019_02_20_exp2_TH	2	pyramidal	2	215	559.5	Point 28	533.078	243.488	554.536	no cnx
2019_02_20_exp2_TH	2	pyramidal	2	215	559.5	Point 29	488.572	192.273	544.106	no cnx
2019_02_20_exp2_TH	2	pyramidal	2	215	559.5	Point 20	509.526	336.644	572.086	no cnx
2019_02_20_exp2_TH	2	pyramidal	2	215	559.5	Point 21	581.874	240.781	572.096	no cnx
2019_02_20_exp2_TH	2	pyramidal	2	215	559.5	Point 22	563.643	184.217	572.096	no cnx
2019_02_20_exp2_TH	2	pyramidal	2	215	559.5	Point 23	490.153	247.842	572.096	no cnx
2019_02_20_exp2_TH	2	pyramidal	2	215	559.5	Point 24	396.127	227.761	572.096	no cnx
2019_02_20_exp2_TH	2	pyramidal	2	215	559.5	Point 25	530.648	325.728	572.096	no cnx
2019_02_20_exp2_TH	2	pyramidal	2	215	559.5	Point 26	468.723	129.149	554.536	no cnx
2019_02_20_exp2_TH	2	pyramidal	2	215	559.5	Point 27	504.71	171.754	554.536	no cnx
2019_02_20_exp2_TH	2	pyramidal	2	215	559.5	Point 39	636.043	453.613	598.946	no cnx
2019_02_20_exp2_TH	2	pyramidal	2	215	559.5	Point 33	537.067	385.834	608.706	no cnx
2019_02_20_exp2_TH	2	pyramidal	2	215	559.5	Point 38	691.002	487.539	598.946	no cnx
2019_02_20_exp2_TH	1	pyramidal	2	205	556.5	Point 11	634.29	20.4337	612.646	no cnx
2019_02_20_exp2_TH	1	pyramidal	2	205	556.5	Point 10	657.937	117.315	612.646	no cnx
2019_02_20_exp2_TH	1	pyramidal	2	205	556.5	Point 13	698.072	127.041	600.226	no cnx
2019_02_20_exp2_TH	1	pyramidal	2	205	556.5	Point 12	693.4	64.595	600.226	no cnx
2019_02_20_exp2_TH	1	pyramidal	2	205	556.5	Point 15	643.339	184.189	600.226	no cnx
2019_02_20_exp2_TH	1	pyramidal	2	205	556.5	Point 14	560.477	191.801	600.226	no cnx
2019_02_20_exp2_TH	1	pyramidal	2	205	556.5	Point 17	664.712	46.853	586.676	no cnx
2019_02_20_exp2_TH	1	pyramidal	2	205	556.5	Point 16	529.154	105.598	586.676	no cnx
2019_02_20_exp2_TH	1	pyramidal	2	205	556.5	Point 19	666.726	178.592	586.676	no cnx
2019_02_20_exp2_TH	1	pyramidal	2	205	556.5	Point 18	655.208	157.084	586.676	no cnx
2019_02_20_exp2_TH	1	pyramidal	2	205	556.5	Point 31	387.19	15.9931	588.346	no cnx
2019_02_20_exp2_TH	1	pyramidal	2	205	556.5	Point 30	255.766	119.976	562.486	no cnx
2019_02_20_exp2_TH	1	pyramidal	2	205	556.5	Point 5	232.505	-6.05219	515.026	inhibitory
2019_02_20_exp2_TH	1	pyramidal	2	205	556.5	Point 4	191.724	-44.6497	515.026	inhibitory
2019_02_20_exp2_TH	1	pyramidal	2	205	556.5	Point 7	219.433	157.345	515.026	no cnx
2019_02_20_exp2_TH	1	pyramidal	2	205	556.5	Point 6	200.939	108.734	515.026	no cnx
2019_02_20_exp2_TH	1	pyramidal	2	205	556.5	Point 1	158.814	-44.1434	559.536	no cnx
2019_02_20_exp2_TH	1	pyramidal	2	205	556.5	Point 3	295.751	77.0091	541.716	inhibitory
2019_02_20_exp2_TH	1	pyramidal	2	205	556.5	Point 2	262.586	126.02	559.536	no cnx
2019_02_20_exp2_TH	1	pyramidal	2	205	556.5	Point 9	596.492	26.651	612.646	no cnx
2019_02_20_exp2_TH	1	pyramidal	2	205	556.5	Point 8	603.59	83.8341	612.646	no cnx
2019_02_20_exp2_TH	1	pyramidal	2	205	556.5	Point 28	516.104	308.272	554.536	no cnx
2019_02_20_exp2_TH	1	pyramidal	2	205	556.5	Point 29	471.597	257.057	544.106	no cnx
2019_02_20_exp2_TH	1	pyramidal	2	205	556.5	Point 20	492.551	401.427	572.086	no cnx
2019_02_20_exp2_TH	1	pyramidal	2	205	556.5	Point 21	564.899	305.565	572.096	no cnx
2019_02_20_exp2_TH	1	pyramidal	2	205	556.5	Point 22	546.669	249.001	572.096	no cnx
2019_02_20_exp2_TH	1	pyramidal	2	205	556.5	Point 23	473.179	312.626	572.096	no cnx
2019_02_20_exp2_TH	1	pyramidal	2	205	556.5	Point 24	379.153	292.544	572.096	no cnx
2019_02_20_exp2_TH	1	pyramidal	2	205	556.5	Point 25	513.673	390.512	572.096	no cnx
2019_02_20_exp2_TH	1	pyramidal	2	205	556.5	Point 26	451.748	193.933	554.536	no cnx
2019_02_20_exp2_TH	1	pyramidal	2	205	556.5	Point 27	487.736	236.538	554.536	no cnx
2019_02_20_exp1_TH	2	pyramidal	2	261	677.986	Point 11	250.715	27.1757	738.396	no cnx
2019_02_20_exp1_TH	2	pyramidal	2	261	677.986	Point 10	426.098	13.4718	750.036	no cnx
2019_02_20_exp1_TH	2	pyramidal	2	261	677.986	Point 13	477.222	-109.329	738.396	inhibitory
2019_02_20_exp1_TH	2	pyramidal	2	261	677.986	Point 12	465.877	26.8118	738.396	no cnx
2019_02_20_exp1_TH	2	pyramidal	2	261	677.986	Point 15	462.048	73.0544	730.636	no cnx
2019_02_20_exp1_TH	2	pyramidal	2	261	677.986	Point 14	429.966	-48.4469	730.636	no cnx
2019_02_20_exp1_TH	2	pyramidal	2	261	677.986	Point 17	420.706	84.6555	730.636	no cnx
2019_02_20_exp1_TH	2	pyramidal	2	261	677.986	Point 16	405.352	134.039	730.636	no cnx
2019_02_20_exp1_TH	2	pyramidal	2	261	677.986	Point 19	248.215	149.462	755.166	no cnx
2019_02_20_exp1_TH	2	pyramidal	2	261	677.986	Point 18	376.19	176.703	755.166	no cnx
2019_02_20_exp1_TH	2	pyramidal	2	261	677.986	Point 31	575.681	-107.333	808.256	no cnx
2019_02_20_exp1_TH	2	pyramidal	2	261	677.986	Point 30	500.291	-52.5688	808.256	no cnx
2019_02_20_exp1_TH	2	pyramidal	2	261	677.986	Point 5	95.8928	-67.328	698.516	no cnx
2019_02_20_exp1_TH	2	pyramidal	2	261	677.986	Point 4	231.892	-49.2837	708.976	no cnx
2019_02_20_exp1_TH	2	pyramidal	2	261	677.986	Point 7	332.028	20.514	757.266	no cnx
2019_02_20_exp1_TH	2	pyramidal	2	261	677.986	Point 6	133.556	-91.7675	698.516	no cnx
2019_02_20_exp1_TH	2	pyramidal	2	261	677.986	Point 1	232.108	-87.0496	723.956	no cnx
2019_02_20_exp1_TH	2	pyramidal	2	261	677.986	Point 3	145.194	-188.224	708.976	no cnx
2019_02_20_exp1_TH	2	pyramidal	2	261	677.986	Point 2	270.317	39.2779	723.956	no cnx
2019_02_20_exp1_TH	2	pyramidal	2	261	677.986	Point 9	437.252	-36.9455	750.036	no cnx
2019_02_20_exp1_TH	2	pyramidal	2	261	677.986	Point 8	354.591	-66.5963	757.266	no cnx
2019_02_20_exp1_TH	2	pyramidal	2	261	677.986	Point 28	458.852	-120.757	769.166	no cnx
2019_02_20_exp1_TH	2	pyramidal	2	261	677.986	Point 29	556.762	-34.0921	808.256	no cnx
2019_02_20_exp1_TH	2	pyramidal	2	261	677.986	Point 20	352.252	286.913	755.166	no cnx
2019_02_20_exp1_TH	2	pyramidal	2	261	677.986	Point 21	393.055	258.517	730.166	no cnx
2019_02_20_exp1_TH	2	pyramidal	2	261	677.986	Point 22	192.308	262.232	730.166	no cnx
2019_02_20_exp1_TH	2	pyramidal	2	261	677.986	Point 23	240.095	329.998	719.936	no cnx
2019_02_20_exp1_TH	2	pyramidal	2	261	677.986	Point 24	341.831	-357.84	777.866	no cnx
2019_02_20_exp1_TH	2	pyramidal	2	261	677.986	Point 25	450.393	-149.565	777.866	no cnx
2019_02_20_exp1_TH	2	pyramidal	2	261	677.986	Point 26	472.728	-329.96	769.166	no cnx
2019_02_20_exp1_TH	2	pyramidal	2	261	677.986	Point 27	325.409	-227.761	769.166	no cnx
2019_02_20_exp1_TH	0	pyramidal	2	253	665.496	Point 11	270.425	143.441	738.396	no cnx
2019_02_20_exp1_TH	0	pyramidal	2	253	665.496	Point 10	445.808	129.737	750.036	no cnx
2019_02_20_exp1_TH	0	pyramidal	2	253	665.496	Point 13	496.933	6.93572	738.396	inhibitory
2019_02_20_exp1_TH	0	pyramidal	2	253	665.496	Point 12	485.587	143.077	738.396	no cnx
2019_02_20_exp1_TH	0	pyramidal	2	253	665.496	Point 15	481.758	189.32	730.636	no cnx
2019_02_20_exp1_TH	0	pyramidal	2	253	665.496	Point 14	449.676	67.8183	730.636	no cnx
2019_02_20_exp1_TH	0	pyramidal	2	253	665.496	Point 17	440.416	200.921	730.636	no cnx
2019_02_20_exp1_TH	0	pyramidal	2	253	665.496	Point 16	425.062	250.305	730.636	no cnx
2019_02_20_exp1_TH	0	pyramidal	2	253	665.496	Point 19	267.926	265.728	755.166	no cnx
2019_02_20_exp1_TH	0	pyramidal	2	253	665.496	Point 18	395.901	292.968	755.166	no cnx
2019_02_20_exp1_TH	0	pyramidal	2	253	665.496	Point 5	115.603	48.9372	698.516	no cnx
2019_02_20_exp1_TH	0	pyramidal	2	253	665.496	Point 4	251.602	66.9815	708.976	inhibitory
2019_02_20_exp1_TH	0	pyramidal	2	253	665.496	Point 7	351.738	136.779	757.266	no cnx
2019_02_20_exp1_TH	0	pyramidal	2	253	665.496	Point 6	153.266	24.4977	698.516	no cnx
2019_02_20_exp1_TH	0	pyramidal	2	253	665.496	Point 1	251.818	29.2156	723.956	inhibitory
2019_02_20_exp1_TH	0	pyramidal	2	253	665.496	Point 3	164.904	-71.9585	708.976	no cnx
2019_02_20_exp1_TH	0	pyramidal	2	253	665.496	Point 2	290.027	155.543	723.956	no cnx
2019_02_20_exp1_TH	0	pyramidal	2	253	665.496	Point 9	456.963	79.3197	750.036	no cnx
2019_02_20_exp1_TH	0	pyramidal	2	253	665.496	Point 8	374.301	49.6689	757.266	no cnx
2019_02_20_exp1_TH	0	pyramidal	2	253	665.496	Point 20	371.962	403.179	755.166	no cnx
2019_02_20_exp1_TH	0	pyramidal	2	253	665.496	Point 21	412.766	374.783	730.166	no cnx
2019_02_20_exp1_TH	0	pyramidal	2	253	665.496	Point 22	212.018	378.498	730.166	no cnx
2019_02_20_exp1_TH	0	pyramidal	2	253	665.496	Point 23	259.805	446.263	719.936	no cnx
2019_02_20_exp1_TH	0	pyramidal	2	253	665.496	Point 24	361.541	-241.575	777.866	no cnx
2019_02_20_exp1_TH	0	pyramidal	2	253	665.496	Point 25	470.103	-33.3002	777.866	no cnx
2019_02_07_exp1_TH	1	pyramidal	2	171	662.346	Point 11	348.237	300.171	631.976	no cnx
2019_02_07_exp1_TH	1	pyramidal	2	171	662.346	Point 10	418.56	273.211	651.966	no cnx
2019_02_07_exp1_TH	1	pyramidal	2	171	662.346	Point 13	671.167	249.156	667.836	no cnx
2019_02_07_exp1_TH	1	pyramidal	2	171	662.346	Point 12	646.535	13.7939	667.836	no cnx
2019_02_07_exp1_TH	1	pyramidal	2	171	662.346	Point 15	656.481	214.756	662.046	no cnx
2019_02_07_exp1_TH	1	pyramidal	2	171	662.346	Point 14	632.703	114.566	662.046	no cnx
2019_02_07_exp1_TH	1	pyramidal	2	171	662.346	Point 17	655.927	193.796	662.046	no cnx
2019_02_07_exp1_TH	1	pyramidal	2	171	662.346	Point 16	703.621	279.564	662.046	no cnx
2019_02_07_exp1_TH	1	pyramidal	2	171	662.346	Point 19	561.182	178.516	694.656	no cnx
2019_02_07_exp1_TH	1	pyramidal	2	171	662.346	Point 18	744.401	285.086	659.546	no cnx
2019_02_07_exp1_TH	1	pyramidal	2	171	662.346	Point 31	458.207	-179.452	691.106	no cnx
2019_02_07_exp1_TH	1	pyramidal	2	171	662.346	Point 30	214.721	-173.681	632.136	no cnx
2019_02_07_exp1_TH	1	pyramidal	2	171	662.346	Point 37	561.234	-65.9555	682.306	no cnx
2019_02_07_exp1_TH	1	pyramidal	2	171	662.346	Point 36	667.491	-183.089	682.306	no cnx
2019_02_07_exp1_TH	1	pyramidal	2	171	662.346	Point 35	554.565	-130.311	682.306	no cnx
2019_02_07_exp1_TH	1	pyramidal	2	171	662.346	Point 34	504.948	-203.632	682.306	no cnx
2019_02_07_exp1_TH	1	pyramidal	2	171	662.346	Point 5	196.361	179.491	642.386	no cnx
2019_02_07_exp1_TH	1	pyramidal	2	171	662.346	Point 4	167.81	137.996	643.826	inhibitory
2019_02_07_exp1_TH	1	pyramidal	2	171	662.346	Point 7	518.814	34.1367	668.416	no cnx
2019_02_07_exp1_TH	1	pyramidal	2	171	662.346	Point 6	517.04	-13.3335	668.416	no cnx
2019_02_07_exp1_TH	1	pyramidal	2	171	662.346	Point 1	45.3597	12.7633	647.626	no cnx
2019_02_07_exp1_TH	1	pyramidal	2	171	662.346	Point 3	214.489	-123.975	642.386	inhibitory
2019_02_07_exp1_TH	1	pyramidal	2	171	662.346	Point 2	287.62	-24.5966	647.626	inhibitory
2019_02_07_exp1_TH	1	pyramidal	2	171	662.346	Point 9	372.342	190.576	651.966	no cnx
2019_02_07_exp1_TH	1	pyramidal	2	171	662.346	Point 8	373.4	53.6114	651.966	no cnx
2019_02_07_exp1_TH	1	pyramidal	2	171	662.346	Point 32	482.764	-123.72	682.306	no cnx
2019_02_07_exp1_TH	1	pyramidal	2	171	662.346	Point 28	257.942	-133.457	688.406	inhibitory
2019_02_07_exp1_TH	1	pyramidal	2	171	662.346	Point 29	104.186	-191.71	632.136	inhibitory
2019_02_07_exp1_TH	1	pyramidal	2	171	662.346	Point 20	705.397	149.149	694.656	no cnx
2019_02_07_exp1_TH	1	pyramidal	2	171	662.346	Point 21	778.714	82.2537	694.656	no cnx
2019_02_07_exp1_TH	1	pyramidal	2	171	662.346	Point 22	587.696	151.285	649.706	no cnx
2019_02_07_exp1_TH	1	pyramidal	2	171	662.346	Point 23	520.785	277.097	649.706	no cnx
2019_02_07_exp1_TH	1	pyramidal	2	171	662.346	Point 24	585.92	272.932	649.706	no cnx
2019_02_07_exp1_TH	1	pyramidal	2	171	662.346	Point 25	558.032	146.194	649.706	no cnx
2019_02_07_exp1_TH	1	pyramidal	2	171	662.346	Point 26	281.713	-146.898	704.236	no cnx
2019_02_07_exp1_TH	1	pyramidal	2	171	662.346	Point 27	331.735	8.83544	704.236	no cnx
2019_02_07_exp1_TH	1	pyramidal	2	171	662.346	Point 33	575.39	-212.884	682.306	no cnx
2018_12_19_exp2_TH	2	pyramidal	2	243	563.896	Point 51	424.399	180.876	609.326	no cnx
2018_12_19_exp2_TH	2	pyramidal	2	243	563.896	Point 50	515.778	106.074	610.826	no cnx
2018_12_19_exp2_TH	2	pyramidal	2	243	563.896	Point 52	441.373	216.818	609.326	no cnx
2018_12_19_exp2_TH	2	pyramidal	2	243	563.896	Point 39	453.761	-179.794	626.326	no cnx
2018_12_19_exp2_TH	2	pyramidal	2	243	563.896	Point 38	471.284	-241.303	626.326	no cnx
2018_12_19_exp2_TH	2	pyramidal	2	243	563.896	Point 33	174.301	-241.064	585.536	no cnx
2018_12_19_exp2_TH	2	pyramidal	2	243	563.896	Point 32	182.703	-254.709	574.156	no cnx
2018_12_19_exp2_TH	2	pyramidal	2	243	563.896	Point 31	286.415	-255.695	561.016	no cnx
2018_12_19_exp2_TH	2	pyramidal	2	243	563.896	Point 30	247.182	-273.148	561.016	no cnx
2018_12_19_exp2_TH	2	pyramidal	2	243	563.896	Point 37	318.905	-174.392	600.516	no cnx
2018_12_19_exp2_TH	2	pyramidal	2	243	563.896	Point 36	381.292	-52.0622	600.516	no cnx
2018_12_19_exp2_TH	2	pyramidal	2	243	563.896	Point 35	379.982	-209.585	600.516	no cnx
2018_12_19_exp2_TH	2	pyramidal	2	243	563.896	Point 34	359.505	-84.8289	600.516	no cnx
2018_12_19_exp2_TH	2	pyramidal	2	243	563.896	Point 48	347.102	31.5695	610.826	no cnx
2018_12_19_exp2_TH	2	pyramidal	2	243	563.896	Point 49	457.632	55.6443	610.826	no cnx
2018_12_19_exp2_TH	2	pyramidal	2	243	563.896	Point 42	417.788	-58.1759	630.106	no cnx
2018_12_19_exp2_TH	2	pyramidal	2	243	563.896	Point 43	454.393	88.4282	630.106	no cnx
2018_12_19_exp2_TH	2	pyramidal	2	243	563.896	Point 40	534.576	-155.169	626.326	no cnx
2018_12_19_exp2_TH	2	pyramidal	2	243	563.896	Point 41	456.858	67.3725	630.106	no cnx
2018_12_19_exp2_TH	2	pyramidal	2	243	563.896	Point 46	354.035	-81.9805	610.826	no cnx
2018_12_19_exp2_TH	2	pyramidal	2	243	563.896	Point 47	402.78	-75.2156	610.826	no cnx
2018_12_19_exp2_TH	2	pyramidal	2	243	563.896	Point 44	457.913	-16.2264	630.106	no cnx
2018_12_19_exp2_TH	2	pyramidal	2	243	563.896	Point 45	456.488	-58.7924	630.106	no cnx
2018_12_19_exp2_TH	2	pyramidal	2	243	563.896	Point 28	175.903	-1.14216	570.176	no cnx
2018_12_19_exp2_TH	2	pyramidal	2	243	563.896	Point 29	129.78	-135.559	561.016	no cnx
2018_12_19_exp2_TH	2	pyramidal	2	243	563.896	Point 22	199.292	-80.4042	597.546	no cnx
2018_12_19_exp2_TH	2	pyramidal	2	243	563.896	Point 23	295.503	16.5623	597.546	no cnx
2018_12_19_exp2_TH	2	pyramidal	2	243	563.896	Point 24	412.342	-78.2478	597.546	inhibitory
2018_12_19_exp2_TH	2	pyramidal	2	243	563.896	Point 25	198.294	-116.9	570.176	no cnx
2018_12_19_exp2_TH	2	pyramidal	2	243	563.896	Point 26	276.493	117.017	570.176	no cnx
2018_12_19_exp2_TH	2	pyramidal	2	243	563.896	Point 27	241.247	-127.257	570.176	inhibitory
2018_12_19_exp2_TH	0	pyramidal	2	161	603.396	Point 39	448.538	-51.3325	626.326	no cnx
2018_12_19_exp2_TH	0	pyramidal	2	161	603.396	Point 38	466.062	-112.841	626.326	no cnx
2018_12_19_exp2_TH	0	pyramidal	2	161	603.396	Point 33	169.078	-112.603	585.536	no cnx
2018_12_19_exp2_TH	0	pyramidal	2	161	603.396	Point 32	177.48	-126.248	574.156	no cnx
2018_12_19_exp2_TH	0	pyramidal	2	161	603.396	Point 31	281.192	-127.234	561.016	no cnx
2018_12_19_exp2_TH	0	pyramidal	2	161	603.396	Point 30	241.959	-144.687	561.016	no cnx
2018_12_19_exp2_TH	0	pyramidal	2	161	603.396	Point 37	313.682	-45.9311	600.516	no cnx
2018_12_19_exp2_TH	0	pyramidal	2	161	603.396	Point 36	376.069	76.3991	600.516	inhibitory
2018_12_19_exp2_TH	0	pyramidal	2	161	603.396	Point 35	374.759	-81.1234	600.516	no cnx
2018_12_19_exp2_TH	0	pyramidal	2	161	603.396	Point 34	354.282	43.6323	600.516	no cnx
2018_12_19_exp2_TH	0	pyramidal	2	161	603.396	Point 42	412.565	70.2854	630.106	inhibitory
2018_12_19_exp2_TH	0	pyramidal	2	161	603.396	Point 43	449.17	216.89	630.106	no cnx
2018_12_19_exp2_TH	0	pyramidal	2	161	603.396	Point 40	529.353	-26.7076	626.326	no cnx
2018_12_19_exp2_TH	0	pyramidal	2	161	603.396	Point 41	451.635	195.834	630.106	no cnx
2018_12_19_exp2_TH	0	pyramidal	2	161	603.396	Point 44	452.69	112.235	630.106	no cnx
2018_12_19_exp2_TH	0	pyramidal	2	161	603.396	Point 45	451.265	69.6688	630.106	no cnx
2018_12_19_exp2_TH	0	pyramidal	2	161	603.396	Point 28	170.68	127.319	570.176	no cnx
2018_12_19_exp2_TH	0	pyramidal	2	161	603.396	Point 29	124.557	-7.09774	561.016	no cnx
2018_12_19_exp2_TH	0	pyramidal	2	161	603.396	Point 22	194.069	48.0571	597.546	inhibitory
2018_12_19_exp2_TH	0	pyramidal	2	161	603.396	Point 23	290.28	145.024	597.546	no cnx
2018_12_19_exp2_TH	0	pyramidal	2	161	603.396	Point 24	407.12	50.2134	597.546	no cnx
2018_12_19_exp2_TH	0	pyramidal	2	161	603.396	Point 25	193.071	11.5609	570.176	inhibitory
2018_12_19_exp2_TH	0	pyramidal	2	161	603.396	Point 26	271.27	245.478	570.176	no cnx
2018_12_19_exp2_TH	0	pyramidal	2	161	603.396	Point 27	236.024	1.20411	570.176	no cnx
2018_12_19_exp1_TH	0	pyramidal	2	200	525.026	Point 5	403.786	-59.2889	492.876	no cnx
2018_12_19_exp1_TH	0	pyramidal	2	200	525.026	Point 4	201.34	-122.646	504.446	inhibitory
2018_12_19_exp1_TH	0	pyramidal	2	200	525.026	Point 7	347.049	-128.096	492.876	no cnx
2018_12_19_exp1_TH	0	pyramidal	2	200	525.026	Point 6	211.639	-133.263	492.876	no cnx
2018_12_19_exp1_TH	0	pyramidal	2	200	525.026	Point 1	173.177	-43.6854	525.356	no cnx
2018_12_19_exp1_TH	0	pyramidal	2	200	525.026	Point 3	195.901	-40.1075	504.446	inhibitory
2018_12_19_exp1_TH	0	pyramidal	2	200	525.026	Point 2	247.908	-94.7195	525.356	no cnx
2018_12_19_exp1_TH	0	pyramidal	2	200	525.026	Point 9	443.714	-51.9465	525.026	no cnx
2018_12_19_exp1_TH	0	pyramidal	2	200	525.026	Point 8	397.982	151.24	525.026	no cnx
2018_12_19_exp1_TH	0	pyramidal	2	200	525.026	Point 11	290.02	7.8196	479.666	inhibitory
2018_12_19_exp1_TH	0	pyramidal	2	200	525.026	Point 10	301.802	105.629	479.666	no cnx
2018_12_19_exp1_TH	0	pyramidal	2	200	525.026	Point 13	424.576	-153.825	508.046	no cnx
2018_12_19_exp1_TH	0	pyramidal	2	200	525.026	Point 12	246.221	158.718	479.666	no cnx
2018_12_19_exp1_TH	0	pyramidal	2	200	525.026	Point 15	413.072	-250.538	508.046	no cnx
2018_12_19_exp1_TH	0	pyramidal	2	200	525.026	Point 14	421.479	-203.673	508.046	no cnx
2018_12_19_exp1_TH	0	pyramidal	2	200	525.026	Point 17	650.938	182.233	513.716	no cnx
2018_12_19_exp1_TH	0	pyramidal	2	200	525.026	Point 16	300.89	-157.083	526.246	no cnx
2018_12_19_exp1_TH	0	pyramidal	2	200	525.026	Point 19	658.74	42.1134	513.716	no cnx
2018_12_19_exp1_TH	0	pyramidal	2	200	525.026	Point 18	739.738	152.439	513.716	no cnx
2018_12_19_exp1_TH	0	pyramidal	2	200	525.026	Point 20	581.709	-127.063	521.766	no cnx
2018_12_13_exp1_TH	2	pyramidal	2	281	430.456	Point 11	424.926	-2.81096	420.166	inhibitory
2018_12_13_exp1_TH	2	pyramidal	2	281	430.456	Point 10	660.071	-29.8072	430.456	no cnx
2018_12_13_exp1_TH	2	pyramidal	2	281	430.456	Point 13	490.904	-43.3124	420.166	no cnx
2018_12_13_exp1_TH	2	pyramidal	2	281	430.456	Point 12	578.492	-49.8913	420.166	no cnx
2018_12_13_exp1_TH	2	pyramidal	2	281	430.456	Point 15	549.552	129.406	420.166	no cnx
2018_12_13_exp1_TH	2	pyramidal	2	281	430.456	Point 14	503.321	70.4415	420.166	no cnx
2018_12_13_exp1_TH	2	pyramidal	2	281	430.456	Point 17	647.89	44.2502	434.326	no cnx
2018_12_13_exp1_TH	2	pyramidal	2	281	430.456	Point 16	578.004	106.982	434.326	no cnx
2018_12_13_exp1_TH	2	pyramidal	2	281	430.456	Point 19	644.822	147.025	420.816	no cnx
2018_12_13_exp1_TH	2	pyramidal	2	281	430.456	Point 18	734.81	98.8792	434.326	no cnx
2018_12_13_exp1_TH	2	pyramidal	2	281	430.456	Point 31	364.655	-388.797	468.596	no cnx
2018_12_13_exp1_TH	2	pyramidal	2	281	430.456	Point 30	247.588	-217.316	468.596	no cnx
2018_12_13_exp1_TH	2	pyramidal	2	281	430.456	Point 37	402.378	-393.021	453.716	no cnx
2018_12_13_exp1_TH	2	pyramidal	2	281	430.456	Point 36	319.212	-328.048	453.716	no cnx
2018_12_13_exp1_TH	2	pyramidal	2	281	430.456	Point 35	217.446	-446.535	449.286	no cnx
2018_12_13_exp1_TH	2	pyramidal	2	281	430.456	Point 34	111.846	-285.839	449.286	no cnx
2018_12_13_exp1_TH	2	pyramidal	2	281	430.456	Point 5	338.913	-38.189	447.466	no cnx
2018_12_13_exp1_TH	2	pyramidal	2	281	430.456	Point 4	276.775	-220.385	455.586	no cnx
2018_12_13_exp1_TH	2	pyramidal	2	281	430.456	Point 7	629.126	6.29767	430.456	inhibitory
2018_12_13_exp1_TH	2	pyramidal	2	281	430.456	Point 6	404.506	-60.4292	430.456	inhibitory
2018_12_13_exp1_TH	2	pyramidal	2	281	430.456	Point 1	185.513	-58.8478	470.936	no cnx
2018_12_13_exp1_TH	2	pyramidal	2	281	430.456	Point 3	407.759	-68.7506	465.206	inhibitory
2018_12_13_exp1_TH	2	pyramidal	2	281	430.456	Point 2	260.52	-133.689	470.936	no cnx
2018_12_13_exp1_TH	2	pyramidal	2	281	430.456	Point 9	545.541	-32.1697	430.456	no cnx
2018_12_13_exp1_TH	2	pyramidal	2	281	430.456	Point 8	462.354	-153.175	433.276	no cnx
2018_12_13_exp1_TH	2	pyramidal	2	281	430.456	Point 32	240.952	-240.507	462.736	no cnx
2018_12_13_exp1_TH	2	pyramidal	2	281	430.456	Point 28	409.876	-249.06	468.596	no cnx
2018_12_13_exp1_TH	2	pyramidal	2	281	430.456	Point 29	486.272	-141.871	468.596	no cnx
2018_12_13_exp1_TH	2	pyramidal	2	281	430.456	Point 20	688.337	94.514	420.816	no cnx
2018_12_13_exp1_TH	2	pyramidal	2	281	430.456	Point 21	534.698	-76.0048	420.816	no cnx
2018_12_13_exp1_TH	2	pyramidal	2	281	430.456	Point 22	762.63	-81.0784	420.796	no cnx
2018_12_13_exp1_TH	2	pyramidal	2	281	430.456	Point 23	815.277	113.59	420.796	no cnx
2018_12_13_exp1_TH	2	pyramidal	2	281	430.456	Point 24	770.676	-108.212	420.796	no cnx
2018_12_13_exp1_TH	2	pyramidal	2	281	430.456	Point 25	728.868	-119.965	442.516	no cnx
2018_12_13_exp1_TH	2	pyramidal	2	281	430.456	Point 26	702.928	-57.3101	442.516	no cnx
2018_12_13_exp1_TH	2	pyramidal	2	281	430.456	Point 27	494.94	-90.3696	468.596	no cnx
2018_12_13_exp1_TH	2	pyramidal	2	281	430.456	Point 33	185.987	-335.079	462.736	no cnx
2018_12_13_exp1_TH	0	pyramidal	2	179	405.356	Point 11	434.706	87.575	420.166	no cnx
2018_12_13_exp1_TH	0	pyramidal	2	179	405.356	Point 10	669.852	60.5788	430.456	no cnx
2018_12_13_exp1_TH	0	pyramidal	2	179	405.356	Point 13	500.684	47.0736	420.166	inhibitory
2018_12_13_exp1_TH	0	pyramidal	2	179	405.356	Point 12	588.272	40.4947	420.166	no cnx
2018_12_13_exp1_TH	0	pyramidal	2	179	405.356	Point 15	559.332	219.792	420.166	no cnx
2018_12_13_exp1_TH	0	pyramidal	2	179	405.356	Point 14	513.101	160.827	420.166	no cnx
2018_12_13_exp1_TH	0	pyramidal	2	179	405.356	Point 17	657.67	134.636	434.326	no cnx
2018_12_13_exp1_TH	0	pyramidal	2	179	405.356	Point 16	587.785	197.368	434.326	no cnx
2018_12_13_exp1_TH	0	pyramidal	2	179	405.356	Point 19	654.602	237.411	420.816	no cnx
2018_12_13_exp1_TH	0	pyramidal	2	179	405.356	Point 18	744.59	189.265	434.326	no cnx
2018_12_13_exp1_TH	0	pyramidal	2	179	405.356	Point 31	374.435	-298.411	468.596	no cnx
2018_12_13_exp1_TH	0	pyramidal	2	179	405.356	Point 30	257.368	-126.93	468.596	no cnx
2018_12_13_exp1_TH	0	pyramidal	2	179	405.356	Point 37	412.158	-302.635	453.716	no cnx
2018_12_13_exp1_TH	0	pyramidal	2	179	405.356	Point 36	328.992	-237.662	453.716	no cnx
2018_12_13_exp1_TH	0	pyramidal	2	179	405.356	Point 35	227.226	-356.149	449.286	no cnx
2018_12_13_exp1_TH	0	pyramidal	2	179	405.356	Point 34	121.626	-195.453	449.286	no cnx
2018_12_13_exp1_TH	0	pyramidal	2	179	405.356	Point 5	348.693	52.1969	447.466	no cnx
2018_12_13_exp1_TH	0	pyramidal	2	179	405.356	Point 4	286.555	-129.999	455.586	inhibitory
2018_12_13_exp1_TH	0	pyramidal	2	179	405.356	Point 7	638.906	96.6837	430.456	no cnx
2018_12_13_exp1_TH	0	pyramidal	2	179	405.356	Point 6	414.286	29.9568	430.456	inhibitory
2018_12_13_exp1_TH	0	pyramidal	2	179	405.356	Point 1	195.293	31.5382	470.936	no cnx
2018_12_13_exp1_TH	0	pyramidal	2	179	405.356	Point 3	417.539	21.6354	465.206	inhibitory
2018_12_13_exp1_TH	0	pyramidal	2	179	405.356	Point 2	270.3	-43.3028	470.936	inhibitory
2018_12_13_exp1_TH	0	pyramidal	2	179	405.356	Point 9	555.321	58.2163	430.456	no cnx
2018_12_13_exp1_TH	0	pyramidal	2	179	405.356	Point 8	472.135	-62.7891	433.276	no cnx
2018_12_13_exp1_TH	0	pyramidal	2	179	405.356	Point 32	250.733	-150.121	462.736	no cnx
2018_12_13_exp1_TH	0	pyramidal	2	179	405.356	Point 28	419.656	-158.674	468.596	inhibitory
2018_12_13_exp1_TH	0	pyramidal	2	179	405.356	Point 29	496.052	-51.4845	468.596	no cnx
2018_12_13_exp1_TH	0	pyramidal	2	179	405.356	Point 20	698.117	184.9	420.816	no cnx
2018_12_13_exp1_TH	0	pyramidal	2	179	405.356	Point 21	544.478	14.3812	420.816	no cnx
2018_12_13_exp1_TH	0	pyramidal	2	179	405.356	Point 22	772.41	9.30763	420.796	no cnx
2018_12_13_exp1_TH	0	pyramidal	2	179	405.356	Point 23	825.057	203.976	420.796	no cnx
2018_12_13_exp1_TH	0	pyramidal	2	179	405.356	Point 24	780.456	-17.8259	420.796	no cnx
2018_12_13_exp1_TH	0	pyramidal	2	179	405.356	Point 25	738.648	-29.5789	442.516	no cnx
2018_12_13_exp1_TH	0	pyramidal	2	179	405.356	Point 26	712.709	33.0759	442.516	no cnx
2018_12_13_exp1_TH	0	pyramidal	2	179	405.356	Point 27	504.72	0.0163988	468.596	no cnx
2018_12_13_exp1_TH	0	pyramidal	2	179	405.356	Point 33	195.767	-244.693	462.736	no cnx
2018_12_11_exp1_TH	2	pyramidal	2	302	430.456	Point 11	472.309	-90.5071	427.556	no cnx
2018_12_11_exp1_TH	2	pyramidal	2	302	430.456	Point 10	445.413	-45.5851	427.556	inhibitory
2018_12_11_exp1_TH	2	pyramidal	2	302	430.456	Point 13	483.175	-54.563	439.366	no cnx
2018_12_11_exp1_TH	2	pyramidal	2	302	430.456	Point 12	389.872	-86.7741	430.096	inhibitory
2018_12_11_exp1_TH	2	pyramidal	2	302	430.456	Point 15	557.095	-77.8279	445.836	no cnx
2018_12_11_exp1_TH	2	pyramidal	2	302	430.456	Point 14	595.909	35.3429	439.366	no cnx
2018_12_11_exp1_TH	2	pyramidal	2	302	430.456	Point 17	745.904	-89.1557	445.836	no cnx
2018_12_11_exp1_TH	2	pyramidal	2	302	430.456	Point 16	665.702	11.4331	445.836	no cnx
2018_12_11_exp1_TH	2	pyramidal	2	302	430.456	Point 19	490.332	-132.496	445.836	no cnx
2018_12_11_exp1_TH	2	pyramidal	2	302	430.456	Point 18	609.444	92.0166	445.836	no cnx
2018_12_11_exp1_TH	2	pyramidal	2	302	430.456	Point 5	347.984	-59.178	443.326	inhibitory
2018_12_11_exp1_TH	2	pyramidal	2	302	430.456	Point 4	334.076	105.658	459.166	no cnx
2018_12_11_exp1_TH	2	pyramidal	2	302	430.456	Point 7	295.264	-7.53484	443.346	inhibitory
2018_12_11_exp1_TH	2	pyramidal	2	302	430.456	Point 6	449.696	28.4937	443.346	inhibitory
2018_12_11_exp1_TH	2	pyramidal	2	302	430.456	Point 1	405.613	-16.5631	457.656	no cnx
2018_12_11_exp1_TH	2	pyramidal	2	302	430.456	Point 3	373.972	76.5432	459.166	inhibitory
2018_12_11_exp1_TH	2	pyramidal	2	302	430.456	Point 2	346.171	-135.396	457.656	inhibitory
2018_12_11_exp1_TH	2	pyramidal	2	302	430.456	Point 9	238.418	38.1857	427.556	no cnx
2018_12_11_exp1_TH	2	pyramidal	2	302	430.456	Point 8	256.157	-111.106	443.346	no cnx
2018_12_11_exp1_TH	2	pyramidal	2	302	430.456	Point 28	294.523	-228.412	461.696	no cnx
2018_12_11_exp1_TH	2	pyramidal	2	302	430.456	Point 29	200.943	-262.385	461.696	no cnx
2018_12_11_exp1_TH	2	pyramidal	2	302	430.456	Point 20	634.814	-71.9484	445.836	no cnx
2018_12_11_exp1_TH	2	pyramidal	2	302	430.456	Point 21	552.966	-108.628	447.166	no cnx
2018_12_11_exp1_TH	2	pyramidal	2	302	430.456	Point 22	435.769	-283.319	447.166	no cnx
2018_12_11_exp1_TH	2	pyramidal	2	302	430.456	Point 23	667.004	-59.3365	420.696	no cnx
2018_12_11_exp1_TH	2	pyramidal	2	302	430.456	Point 24	698.065	-150.931	420.696	no cnx
2018_12_11_exp1_TH	2	pyramidal	2	302	430.456	Point 25	174.055	-297.317	480.096	no cnx
2018_12_11_exp1_TH	2	pyramidal	2	302	430.456	Point 26	139.836	-332.434	467.606	no cnx
2018_12_11_exp1_TH	2	pyramidal	2	302	430.456	Point 27	170.848	-244.642	461.696	no cnx

## Sheet: Figure6B_SstAi167_L23PC_map
exp_id	headstage	post_class	post_layer	postPia	post_z	MP_ID	prePia	x_ap	pre_z	cnx
2020_01_31_exp2_TH	2	pyramidal	2	304	-807.199	Point 11	600.514	267.574	-770.719	no cnx
2020_01_31_exp2_TH	2	pyramidal	2	304	-807.199	Point 10	695.603	-45.5163	-795.149	no cnx
2020_01_31_exp2_TH	2	pyramidal	2	304	-807.199	Point 13	705.706	165.743	-770.719	no cnx
2020_01_31_exp2_TH	2	pyramidal	2	304	-807.199	Point 12	722.148	235.929	-770.719	no cnx
2020_01_31_exp2_TH	2	pyramidal	2	304	-807.199	Point 15	681.339	146.704	-841.309	no cnx
2020_01_31_exp2_TH	2	pyramidal	2	304	-807.199	Point 14	687.319	365.95	-781.649	no cnx
2020_01_31_exp2_TH	2	pyramidal	2	304	-807.199	Point 17	743.075	222.526	-841.309	no cnx
2020_01_31_exp2_TH	2	pyramidal	2	304	-807.199	Point 16	702.441	75.3276	-841.309	no cnx
2020_01_31_exp2_TH	2	pyramidal	2	304	-807.199	Point 19	739.629	-145.138	-870.299	no cnx
2020_01_31_exp2_TH	2	pyramidal	2	304	-807.199	Point 18	650.552	-276.618	-830.619	no cnx
2020_01_31_exp2_TH	2	pyramidal	2	304	-807.199	Point 5	387.1	-182.72	-835.819	no cnx
2020_01_31_exp2_TH	2	pyramidal	2	304	-807.199	Point 7	270.597	371.06	-793.609	no cnx
2020_01_31_exp2_TH	2	pyramidal	2	304	-807.199	Point 6	476.098	-247.323	-853.259	no cnx
2020_01_31_exp2_TH	2	pyramidal	2	304	-807.199	Point 1	224.577	255.555	-830.629	no cnx
2020_01_31_exp2_TH	2	pyramidal	2	304	-807.199	Point 3	276.37	44.7683	-876.049	no cnx
2020_01_31_exp2_TH	2	pyramidal	2	304	-807.199	Point 2	272.286	46.7806	-847.299	no cnx
2020_01_31_exp2_TH	2	pyramidal	2	304	-807.199	Point 9	716.796	38.5591	-795.149	no cnx
2020_01_31_exp2_TH	2	pyramidal	2	304	-807.199	Point 8	445.117	322.141	-829.809	no cnx
2020_01_31_exp2_TH	2	pyramidal	2	304	-807.199	Point 20	724.074	-268.296	-870.299	no cnx
2020_01_31_exp2_TH	2	pyramidal	2	304	-807.199	Point 21	669.418	-434.042	-850.089	no cnx
2020_01_31_exp2_TH	2	pyramidal	2	304	-807.199	Point 22	804.49	-401.378	-850.089	no cnx
2020_01_31_exp2_TH	2	pyramidal	2	304	-807.199	Point 23	818.599	-529.889	-850.089	no cnx
2020_01_31_exp2_TH	2	pyramidal	2	304	-807.199	Point 24	848.681	-622.243	-869.089	no cnx
2020_01_31_exp2_TH	2	pyramidal	2	304	-807.199	Point 25	741.138	-588.602	-869.089	no cnx
2020_01_31_exp2_TH	2	pyramidal	2	304	-807.199	Point 26	632.301	-606.51	-869.089	no cnx
2020_01_31_exp2_TH	1	pyramidal	2	239	-807.199	Point 11	600.526	179.895	-770.719	no cnx
2020_01_31_exp2_TH	1	pyramidal	2	239	-807.199	Point 10	695.615	-133.195	-795.149	no cnx
2020_01_31_exp2_TH	1	pyramidal	2	239	-807.199	Point 13	705.718	78.0642	-770.719	no cnx
2020_01_31_exp2_TH	1	pyramidal	2	239	-807.199	Point 12	722.16	148.25	-770.719	no cnx
2020_01_31_exp2_TH	1	pyramidal	2	239	-807.199	Point 15	681.351	59.0254	-841.309	no cnx
2020_01_31_exp2_TH	1	pyramidal	2	239	-807.199	Point 14	687.331	278.271	-781.649	no cnx
2020_01_31_exp2_TH	1	pyramidal	2	239	-807.199	Point 17	743.087	134.846	-841.309	no cnx
2020_01_31_exp2_TH	1	pyramidal	2	239	-807.199	Point 16	702.453	-12.3515	-841.309	no cnx
2020_01_31_exp2_TH	1	pyramidal	2	239	-807.199	Point 19	739.642	-232.817	-870.299	no cnx
2020_01_31_exp2_TH	1	pyramidal	2	239	-807.199	Point 18	650.565	-364.297	-830.619	no cnx
2020_01_31_exp2_TH	1	pyramidal	2	239	-807.199	Point 5	387.112	-270.399	-835.819	no cnx
2020_01_31_exp2_TH	1	pyramidal	2	239	-807.199	Point 7	270.61	283.381	-793.609	no cnx
2020_01_31_exp2_TH	1	pyramidal	2	239	-807.199	Point 6	476.111	-335.002	-853.259	no cnx
2020_01_31_exp2_TH	1	pyramidal	2	239	-807.199	Point 1	224.589	167.876	-830.629	no cnx
2020_01_31_exp2_TH	1	pyramidal	2	239	-807.199	Point 3	276.383	-42.9108	-876.049	inhibitory
2020_01_31_exp2_TH	1	pyramidal	2	239	-807.199	Point 2	272.299	-40.8984	-847.299	inhibitory
2020_01_31_exp2_TH	1	pyramidal	2	239	-807.199	Point 9	716.809	-49.1199	-795.149	no cnx
2020_01_31_exp2_TH	1	pyramidal	2	239	-807.199	Point 8	445.13	234.462	-829.809	no cnx
2020_01_31_exp2_TH	1	pyramidal	2	239	-807.199	Point 20	724.087	-355.975	-870.299	no cnx
2020_01_31_exp2_TH	1	pyramidal	2	239	-807.199	Point 21	669.431	-521.721	-850.089	no cnx
2020_01_31_exp2_TH	1	pyramidal	2	239	-807.199	Point 22	804.502	-489.057	-850.089	no cnx
2020_01_31_exp2_TH	1	pyramidal	2	239	-807.199	Point 23	818.611	-617.569	-850.089	no cnx
2020_01_31_exp2_TH	1	pyramidal	2	239	-807.199	Point 24	848.694	-709.922	-869.089	no cnx
2020_01_31_exp2_TH	1	pyramidal	2	239	-807.199	Point 25	741.151	-676.281	-869.089	no cnx
2020_01_31_exp2_TH	1	pyramidal	2	239	-807.199	Point 26	632.314	-694.189	-869.089	no cnx
2020_01_31_exp2_TH	0	pyramidal	2	276	-786.041	Point 5	387.345	-460.549	-835.819	no cnx
2020_01_31_exp2_TH	0	pyramidal	2	276	-786.041	Point 7	270.843	93.2307	-793.609	no cnx
2020_01_31_exp2_TH	0	pyramidal	2	276	-786.041	Point 6	476.344	-525.153	-853.259	no cnx
2020_01_31_exp2_TH	0	pyramidal	2	276	-786.041	Point 1	224.822	-22.2745	-830.629	inhibitory
2020_01_31_exp2_TH	0	pyramidal	2	276	-786.041	Point 3	276.616	-233.061	-876.049	no cnx
2020_01_31_exp2_TH	0	pyramidal	2	276	-786.041	Point 2	272.532	-231.049	-847.299	no cnx
2018_11_19_exp3_TH	2	pyramidal	2	195	-677.796	TSeries_387_1	571.621	-219.564	-648.216	no cnx
2018_11_19_exp3_TH	2	pyramidal	2	195	-677.796	TSeries_127_1	720.83	280.609	-628.686	no cnx
2018_11_19_exp3_TH	2	pyramidal	2	195	-677.796	TSeries_407_1	286.609	-113.859	-681.866	no cnx
2018_11_19_exp3_TH	2	pyramidal	2	195	-677.796	TSeries_27_1	555.224	206.103	-675.876	no cnx
2018_11_19_exp3_TH	2	pyramidal	2	195	-677.796	TSeries_427_1	98.224	540.791	-571.116	no cnx
2018_11_19_exp3_TH	2	pyramidal	2	195	-677.796	TSeries_47_1	668.795	106.011	-623.146	no cnx
2018_11_19_exp3_TH	2	pyramidal	2	195	-677.796	TSeries_167_2	541.642	322.365	-563.656	no cnx
2018_11_19_exp3_TH	2	pyramidal	2	195	-677.796	TSeries_167_1	581.366	400.912	-563.656	no cnx
2018_11_19_exp3_TH	2	pyramidal	2	195	-677.796	TSeries_367_1	796.386	-519.456	-669.266	no cnx
2018_11_19_exp3_TH	2	pyramidal	2	195	-677.796	TSeries_147_1	653.911	377.005	-635.756	no cnx
2018_11_19_exp3_TH	2	pyramidal	2	195	-677.796	TSeries_287_2	598.725	204.306	-563.236	no cnx
2018_11_19_exp3_TH	2	pyramidal	2	195	-677.796	TSeries_87_1	658.56	135.884	-623.146	inhibitory
2018_11_19_exp3_TH	2	pyramidal	2	195	-677.796	TSeries_247_2	509.574	200.216	-567.006	no cnx
2018_11_19_exp3_TH	2	pyramidal	2	195	-677.796	TSeries_327_1	443.997	308.066	-599.416	no cnx
2018_11_19_exp3_TH	1	pyramidal	2	251	-663.796	TSeries_387_1	578.902	-284.271	-648.216	no cnx
2018_11_19_exp3_TH	1	pyramidal	2	251	-663.796	TSeries_127_1	728.111	215.903	-628.686	no cnx
2018_11_19_exp3_TH	1	pyramidal	2	251	-663.796	TSeries_407_1	293.889	-178.565	-681.866	no cnx
2018_11_19_exp3_TH	1	pyramidal	2	251	-663.796	TSeries_27_1	562.505	141.397	-675.876	no cnx
2018_11_19_exp3_TH	1	pyramidal	2	251	-663.796	TSeries_47_1	676.076	41.3043	-623.146	no cnx
2018_11_19_exp3_TH	1	pyramidal	2	251	-663.796	TSeries_167_2	548.922	257.659	-563.656	no cnx
2018_11_19_exp3_TH	1	pyramidal	2	251	-663.796	TSeries_167_1	588.647	336.206	-563.656	no cnx
2018_11_19_exp3_TH	1	pyramidal	2	251	-663.796	TSeries_367_1	803.667	-584.162	-669.266	no cnx
2018_11_19_exp3_TH	1	pyramidal	2	251	-663.796	TSeries_147_1	661.192	312.299	-635.756	no cnx
2018_11_19_exp3_TH	1	pyramidal	2	251	-663.796	TSeries_287_2	606.006	139.599	-563.236	no cnx
2018_11_19_exp3_TH	1	pyramidal	2	251	-663.796	TSeries_87_1	665.841	71.1773	-623.146	no cnx
2018_11_19_exp3_TH	1	pyramidal	2	251	-663.796	TSeries_247_2	516.855	135.51	-567.006	no cnx
2018_11_19_exp3_TH	1	pyramidal	2	251	-663.796	TSeries_327_1	451.278	243.36	-599.416	no cnx
2018_11_19_exp3_TH	0	pyramidal	2	171	-659.796	TSeries_387_1	586.354	-393.568	-648.216	no cnx
2018_11_19_exp3_TH	0	pyramidal	2	171	-659.796	TSeries_127_1	735.563	106.606	-628.686	no cnx
2018_11_19_exp3_TH	0	pyramidal	2	171	-659.796	TSeries_407_1	301.341	-287.862	-681.866	no cnx
2018_11_19_exp3_TH	0	pyramidal	2	171	-659.796	TSeries_27_1	569.957	32.1001	-675.876	no cnx
2018_11_19_exp3_TH	0	pyramidal	2	171	-659.796	TSeries_427_1	112.957	366.788	-571.116	no cnx
2018_11_19_exp3_TH	0	pyramidal	2	171	-659.796	TSeries_47_1	683.528	-67.9927	-623.146	no cnx
2018_11_19_exp3_TH	0	pyramidal	2	171	-659.796	TSeries_167_2	556.374	148.362	-563.656	no cnx
2018_11_19_exp3_TH	0	pyramidal	2	171	-659.796	TSeries_167_1	596.098	226.909	-563.656	no cnx
2018_11_19_exp3_TH	0	pyramidal	2	171	-659.796	TSeries_367_1	811.119	-693.459	-669.266	no cnx
2018_11_19_exp3_TH	0	pyramidal	2	171	-659.796	TSeries_147_1	668.644	203.002	-635.756	no cnx
2018_11_19_exp3_TH	0	pyramidal	2	171	-659.796	TSeries_287_2	613.458	30.3025	-563.236	no cnx
2018_11_19_exp3_TH	0	pyramidal	2	171	-659.796	TSeries_87_1	673.293	-38.1197	-623.146	no cnx
2018_11_19_exp3_TH	0	pyramidal	2	171	-659.796	TSeries_247_2	524.307	26.213	-567.006	no cnx
2018_11_19_exp3_TH	0	pyramidal	2	171	-659.796	TSeries_327_1	458.73	134.063	-599.416	no cnx
2018_11_19_exp2_TH	1	pyramidal	2	216	-596.816	TSeries_248_1	540.563	-24.1907	-654.736	no cnx
2018_11_19_exp2_TH	1	pyramidal	2	216	-596.816	TSeries_288_1	655.124	-165.015	-732.696	no cnx
2018_11_19_exp2_TH	1	pyramidal	2	216	-596.816	TSeries_288_2	816.57	-193.056	-732.696	no cnx
2018_11_19_exp2_TH	1	pyramidal	2	216	-596.816	TSeries_268_1	633.283	386.01	-677.206	no cnx
2018_11_19_exp2_TH	1	pyramidal	2	216	-596.816	TSeries_208_1	609.615	179.815	-722.116	no cnx
2018_11_19_exp2_TH	1	pyramidal	2	216	-596.816	TSeries_208_2	553.18	-80.8256	-722.116	no cnx
2018_11_19_exp1_TH	2	pyramidal	2	182	-695.126	TSeries_238_1	484.034	225.321	-761.546	no cnx
2018_11_19_exp1_TH	2	pyramidal	2	182	-695.126	TSeries_28_1	120.867	190.067	-690.446	no cnx
2018_11_19_exp1_TH	2	pyramidal	2	182	-695.126	TSeries_258_1	508.948	187.698	-758.246	no cnx
2018_11_19_exp1_TH	2	pyramidal	2	182	-695.126	TSeries_298_1	721.979	72.2426	-762.046	no cnx
2018_11_19_exp1_TH	2	pyramidal	2	182	-695.126	TSeries_278_1	660.485	-51.0909	-615.316	no cnx
2018_11_19_exp1_TH	2	pyramidal	2	182	-695.126	TSeries_318_2	628.003	318.456	-818.016	no cnx
2018_11_19_exp1_TH	2	pyramidal	2	182	-695.126	TSeries_318_3	574.954	473.297	-818.016	no cnx
2018_11_19_exp1_TH	2	pyramidal	2	182	-695.126	TSeries_318_1	736.568	384.724	-818.016	no cnx
2018_11_19_exp1_TH	2	pyramidal	2	182	-695.126	TSeries_218_1	307.945	-186.759	-598.516	no cnx
2018_11_19_exp1_TH	1	pyramidal	2	184	-701.156	TSeries_28_1	133.234	62.8704	-690.446	inhibitory
2018_11_19_exp1_TH	1	pyramidal	2	184	-701.156	TSeries_128_1	268.132	-95.5049	-700.116	inhibitory
2018_11_15_exp3_TH	3	pyramidal	2	224	-682.386	TSeries_387_1	635.939	360.257	-592.956	no cnx
2018_11_15_exp3_TH	3	pyramidal	2	224	-682.386	TSeries_127_1	235.07	206.657	-644.976	no cnx
2018_11_15_exp3_TH	3	pyramidal	2	224	-682.386	TSeries_407_1	836.109	159.472	-653.436	no cnx
2018_11_15_exp3_TH	3	pyramidal	2	224	-682.386	TSeries_227_1	700.179	-27.7244	-693.776	no cnx
2018_11_15_exp3_TH	3	pyramidal	2	224	-682.386	TSeries_227_2	589.839	-67.3645	-693.776	no cnx
2018_11_15_exp3_TH	3	pyramidal	2	224	-682.386	TSeries_347_1	626.287	270.461	-656.906	no cnx
2018_11_15_exp3_TH	3	pyramidal	2	224	-682.386	TSeries_67_1	184.73	-27.3604	-587.666	inhibitory
2018_11_15_exp3_TH	3	pyramidal	2	224	-682.386	TSeries_147_1	276.866	92.1563	-651.266	no cnx
2018_11_15_exp3_TH	3	pyramidal	2	224	-682.386	TSeries_147_2	468.549	-16.3346	-651.266	no cnx
2018_11_15_exp3_TH	3	pyramidal	2	224	-682.386	TSeries_267_1	591.85	-176.853	-673.406	no cnx
2018_11_15_exp3_TH	3	pyramidal	2	224	-682.386	TSeries_287_1	572.125	-299.353	-684.806	no cnx
2018_11_15_exp2_TH	3	pyramidal	2	308	-738.986	TSeries_193_1	599.759	-256.886	-840.636	no cnx
2018_11_15_exp2_TH	3	pyramidal	2	308	-738.986	TSeries_233_1	527.093	-220.03	-832.376	no cnx
2018_11_15_exp2_TH	3	pyramidal	2	308	-738.986	TSeries_433_1	435.371	531.118	-659.736	no cnx
2018_11_15_exp2_TH	3	pyramidal	2	308	-738.986	TSeries_173_1	570.982	94.7246	-783.286	no cnx
2018_11_15_exp2_TH	3	pyramidal	2	308	-738.986	TSeries_33_1	309.232	24.0723	-720.676	no cnx
2018_11_15_exp2_TH	3	pyramidal	2	308	-738.986	TSeries_353_1	787.277	601.294	-629.646	no cnx
2018_11_15_exp2_TH	3	pyramidal	2	308	-738.986	TSeries_73_1	455.593	157.835	-705.636	inhibitory
2018_11_15_exp2_TH	3	pyramidal	2	308	-738.986	TSeries_313_1	746.243	465.151	-740.586	no cnx
2018_11_15_exp2_TH	3	pyramidal	2	308	-738.986	TSeries_53_1	124.34	339.146	-563.326	no cnx
2018_11_15_exp2_TH	3	pyramidal	2	308	-738.986	TSeries_373_1	560.547	386.731	-675.666	no cnx
2018_11_15_exp2_TH	3	pyramidal	2	308	-738.986	TSeries_333_1	793.039	432.18	-700.286	no cnx
2018_11_15_exp2_TH	3	pyramidal	2	308	-738.986	TSeries_253_1	742.204	-157.663	-878.216	no cnx
2018_11_15_exp2_TH	3	pyramidal	2	308	-738.986	TSeries_273_1	778.918	-1.83827	-862.096	no cnx
2018_11_15_exp1_TH	0	pyramidal	2	321	-713.976	TSeries_193_1	657.315	-79.5691	-764.436	no cnx
2018_11_15_exp1_TH	0	pyramidal	2	321	-713.976	TSeries_133_1	702.284	483.767	-731.356	no cnx
2018_11_15_exp1_TH	0	pyramidal	2	321	-713.976	TSeries_133_2	752.108	417.809	-731.356	no cnx
2018_11_15_exp1_TH	0	pyramidal	2	321	-713.976	TSeries_233_1	639.399	-388.413	-718.526	no cnx
2018_11_15_exp1_TH	0	pyramidal	2	321	-713.976	TSeries_173_1	608.977	69.0506	-731.756	no cnx
2018_11_15_exp1_TH	0	pyramidal	2	321	-713.976	TSeries_113_1	647.294	136.024	-739.906	no cnx
2018_11_15_exp1_TH	0	pyramidal	2	321	-713.976	TSeries_313_1	430.706	431.819	-593.486	no cnx
2018_11_15_exp1_TH	0	pyramidal	2	321	-713.976	TSeries_213_1	693.957	-97.4034	-789.506	no cnx
2018_11_15_exp1_TH	0	pyramidal	2	321	-713.976	TSeries_253_1	502.716	-503.027	-685.606	no cnx
2018_11_15_exp1_TH	0	pyramidal	2	321	-713.976	TSeries_253_2	580.126	-348.617	-685.606	no cnx
2018_11_15_exp1_TH	0	pyramidal	2	321	-713.976	TSeries_293_1	563.938	-552.477	-656.906	no cnx
2018_11_13_exp2_TH	3	pyramidal	2	247	-596.486	TSeries_33_1	243.974	168.866	-584.076	no cnx
2018_11_13_exp2_TH	3	pyramidal	2	247	-596.486	TSeries_204_1	155.284	166.011	-538.406	no cnx
2018_11_13_exp2_TH	3	pyramidal	2	247	-596.486	TSeries_325_2	567.269	249.679	-636.366	no cnx
2018_11_13_exp2_TH	3	pyramidal	2	247	-596.486	TSeries_325_1	698.985	185.447	-636.366	no cnx
2018_11_13_exp2_TH	2	pyramidal	2	178	-599.486	TSeries_33_1	257.348	135.318	-584.076	no cnx
2018_11_13_exp2_TH	1	pyramidal	2	168	-591.486	TSeries_33_1	263.452	47.6843	-584.076	inhibitory
2018_11_13_exp2_TH	1	pyramidal	2	168	-591.486	TSeries_245_1	631.679	-211.236	-615.706	no cnx
2018_11_13_exp2_TH	1	pyramidal	2	168	-591.486	TSeries_245_2	679.186	-69.9482	-615.706	no cnx
2018_11_13_exp1_TH	1	pyramidal	2	239	-575.436	TSeries_432_1	553.116	353.592	-583.206	no cnx
2018_11_13_exp1_TH	1	pyramidal	2	239	-575.436	TSeries_432_2	629.161	305.363	-583.206	no cnx
2018_11_13_exp1_TH	1	pyramidal	2	239	-575.436	TSeries_412_1	675.947	253.613	-634.866	no cnx
2018_11_13_exp1_TH	1	pyramidal	2	239	-575.436	TSeries_352_1	415.448	-133.392	-629.756	no cnx
2018_11_13_exp1_TH	1	pyramidal	2	239	-575.436	TSeries_32_1	286.593	-15.8102	-593.216	no cnx
2018_11_13_exp1_TH	1	pyramidal	2	239	-575.436	TSeries_72_1	210.068	-33.8276	-534.426	no cnx
2018_11_13_exp1_TH	1	pyramidal	2	239	-575.436	TSeries_392_1	688.7	76.2175	-659.366	no cnx
2018_09_06_exp2_TH	1	pyramidal	2	170	1946.62	TSeries_188_1	427.551	108.848	2012.57	no cnx
2018_09_06_exp2_TH	1	pyramidal	2	170	1946.62	TSeries_47_1	241.017	-454.197	2046.68	no cnx
2018_09_06_exp2_TH	1	pyramidal	2	170	1946.62	TSeries_208_1	571.971	381.367	2052.82	no cnx
2018_09_06_exp2_TH	1	pyramidal	2	170	1946.62	TSeries_168_1	389.095	13.7207	1989.88	no cnx
2018_09_06_exp2_TH	1	pyramidal	2	170	1946.62	TSeries_87_1	205.271	-228.248	2025.44	no cnx
2018_09_06_exp2_TH	1	pyramidal	2	170	1946.62	TSeries_107_1	172.65	-215.315	1991.39	no cnx
2018_09_06_exp2_TH	1	pyramidal	2	170	1946.62	TSeries_27_1	128.601	-71.5355	1968.56	no cnx
2018_09_06_exp1_TH	1	pyramidal	2	150	2167.18	TSeries_173_1	68.4552	473.108	2169.64	no cnx
2018_09_06_exp1_TH	1	pyramidal	2	150	2167.18	TSeries_213_1	518.385	1000.38	2288.26	no cnx
2018_09_06_exp1_TH	1	pyramidal	2	150	2167.18	TSeries_153_1	267.93	271.373	2196.39	no cnx
2018_09_06_exp1_TH	1	pyramidal	2	150	2167.18	TSeries_274_1	624.965	-405.124	2219.03	no cnx
2018_09_06_exp1_TH	1	pyramidal	2	150	2167.18	TSeries_93_2	715.916	217.607	2232.57	no cnx
2018_09_06_exp1_TH	1	pyramidal	2	150	2167.18	TSeries_93_1	572.693	111.275	2232.57	no cnx
2018_09_06_exp1_TH	1	pyramidal	2	150	2167.18	TSeries_33_1	96.5184	12.183	2168.01	no cnx
2018_09_06_exp1_TH	1	pyramidal	2	150	2167.18	TSeries_254_1	596.792	-327.677	2166.49	no cnx
2018_09_06_exp1_TH	1	pyramidal	2	150	2167.18	TSeries_73_1	276.668	-113.083	2183.43	no cnx
2018_09_06_exp1_TH	1	pyramidal	2	150	2167.18	TSeries_133_1	513.129	227.497	2187.16	no cnx
2018_09_06_exp1_TH	0	pyramidal	2	177	2162.18	TSeries_173_1	70.8284	626.802	2169.64	no cnx
2018_09_06_exp1_TH	0	pyramidal	2	177	2162.18	TSeries_213_1	522.258	1152.79	2288.26	no cnx
2018_09_06_exp1_TH	0	pyramidal	2	177	2162.18	TSeries_153_1	269.727	424.499	2196.39	no cnx
2018_09_06_exp1_TH	0	pyramidal	2	177	2162.18	TSeries_274_1	624.834	-253.012	2219.03	no cnx
2018_09_06_exp1_TH	0	pyramidal	2	177	2162.18	TSeries_93_2	717.558	369.457	2232.57	no cnx
2018_09_06_exp1_TH	0	pyramidal	2	177	2162.18	TSeries_93_1	574.033	263.533	2232.57	no cnx
2018_09_06_exp1_TH	0	pyramidal	2	177	2162.18	TSeries_33_1	97.5781	165.799	2168.01	inhibitory
2018_09_06_exp1_TH	0	pyramidal	2	177	2162.18	TSeries_254_1	596.881	-175.485	2166.49	no cnx
2018_09_06_exp1_TH	0	pyramidal	2	177	2162.18	TSeries_73_1	277.37	40.0195	2183.43	no cnx
2018_09_06_exp1_TH	0	pyramidal	2	177	2162.18	TSeries_133_1	514.801	379.925	2187.16	no cnx
2018_09_05_exp1_LH	1	pyramidal	2	206	696.855	TSeries_307_1	516.551	-16.7232	747.635	no cnx
2018_09_05_exp1_LH	1	pyramidal	2	206	696.855	TSeries_467_1	566.794	259.394	676.935	no cnx
2018_09_05_exp1_LH	1	pyramidal	2	206	696.855	TSeries_27_1	139.911	-95.1772	718.985	no cnx
2018_09_05_exp1_LH	1	pyramidal	2	206	696.855	TSeries_107_1	557.513	-37.6872	684.875	no cnx
2018_09_05_exp1_LH	1	pyramidal	2	206	696.855	TSeries_227_1	636.739	-139.711	721.955	no cnx
2018_09_05_exp1_LH	1	pyramidal	2	206	696.855	TSeries_227_2	464.247	-42.114	721.955	no cnx
2018_09_05_exp1_LH	1	pyramidal	2	206	696.855	TSeries_347_1	640.046	74.7652	625.935	no cnx
2018_09_05_exp1_LH	1	pyramidal	2	206	696.855	TSeries_427_1	485.6	215.623	659.055	no cnx
2018_09_05_exp1_LH	1	pyramidal	2	206	696.855	TSeries_507_1	476.164	343.282	659.505	no cnx
2018_09_05_exp1_LH	1	pyramidal	2	206	696.855	TSeries_507_2	547.582	490.086	659.505	no cnx
2018_09_05_exp1_LH	1	pyramidal	2	206	696.855	TSeries_387_1	525.281	100.698	630.445	no cnx
2018_09_05_exp1_LH	1	pyramidal	2	206	696.855	TSeries_67_1	421.656	47.1408	745.385	inhibitory
2018_09_05_exp1_LH	1	pyramidal	2	206	696.855	TSeries_147_2	618.507	-20.3221	717.855	no cnx
2018_08_15_exp2_CAB	2	pyramidal	2	197	-161.78	TSeries_507_1	726.689	-170.49	-207.67	no cnx
2018_08_15_exp2_CAB	2	pyramidal	2	197	-161.78	TSeries_447_1	537.783	88.3596	-181.29	no cnx
2018_08_15_exp2_CAB	2	pyramidal	2	197	-161.78	TSeries_527_1	816.016	134.056	-90.77	no cnx
2018_08_15_exp2_CAB	2	pyramidal	2	197	-161.78	TSeries_127_1	238.506	58.538	-107.64	no cnx
2018_08_15_exp2_CAB	2	pyramidal	2	197	-161.78	TSeries_327_1	441.86	42.9824	-188.67	no cnx
2018_08_15_exp2_CAB	2	pyramidal	2	197	-161.78	TSeries_327_2	256.781	-59.186	-188.67	no cnx
2018_08_15_exp2_CAB	2	pyramidal	2	197	-161.78	TSeries_487_1	719.168	-64.3256	-119.29	no cnx
2018_08_15_exp2_CAB	2	pyramidal	2	197	-161.78	TSeries_427_1	407.323	-37.3489	-73.22	no cnx
2018_08_15_exp2_CAB	2	pyramidal	2	197	-161.78	TSeries_547_1	550.519	-172.24	-251.78	inhibitory
2018_08_15_exp2_CAB	2	pyramidal	2	197	-161.78	TSeries_547_2	549.003	-192.917	-251.78	no cnx
2018_08_15_exp2_CAB	2	pyramidal	2	197	-161.78	TSeries_407_1	241.9	55.95	-120.32	no cnx
2018_08_15_exp2_CAB	2	pyramidal	2	197	-161.78	TSeries_187_1	252.906	-62.3493	-184.77	inhibitory
2018_08_15_exp2_CAB	1	pyramidal	2	164	-155.78	TSeries_507_1	722.654	-216.132	-207.67	no cnx
2018_08_15_exp2_CAB	1	pyramidal	2	164	-155.78	TSeries_447_1	542.038	48.5686	-181.29	no cnx
2018_08_15_exp2_CAB	1	pyramidal	2	164	-155.78	TSeries_527_1	821.578	85.4332	-90.77	no cnx
2018_08_15_exp2_CAB	1	pyramidal	2	164	-155.78	TSeries_127_1	241.967	28.2375	-107.64	no cnx
2018_08_15_exp2_CAB	1	pyramidal	2	164	-155.78	TSeries_327_1	444.726	6.2512	-188.67	no cnx
2018_08_15_exp2_CAB	1	pyramidal	2	164	-155.78	TSeries_327_2	256.505	-90.0061	-188.67	no cnx
2018_08_15_exp2_CAB	1	pyramidal	2	164	-155.78	TSeries_487_1	718.497	-109.783	-119.29	no cnx
2018_08_15_exp2_CAB	1	pyramidal	2	164	-155.78	TSeries_427_1	407.663	-72.9463	-73.22	no cnx
2018_08_15_exp2_CAB	1	pyramidal	2	164	-155.78	TSeries_547_1	546.516	-212.304	-251.78	no cnx
2018_08_15_exp2_CAB	1	pyramidal	2	164	-155.78	TSeries_547_2	544.347	-232.922	-251.78	no cnx
2018_08_15_exp2_CAB	1	pyramidal	2	164	-155.78	TSeries_407_1	245.277	25.5433	-120.32	no cnx
2018_08_15_exp2_CAB	1	pyramidal	2	164	-155.78	TSeries_187_1	252.532	-93.0452	-184.77	no cnx
2018_08_15_exp1_CAB	2	pyramidal	2	279	-234.25	TSeries_107_1	276.471	363.352	-224.69	no cnx
2018_08_15_exp1_CAB	2	pyramidal	2	279	-234.25	TSeries_627_1	971.466	-52.2945	-170.92	no cnx
2018_08_15_exp1_CAB	2	pyramidal	2	279	-234.25	TSeries_347_1	935.753	-119.886	-209.45	no cnx
2018_08_15_exp1_CAB	2	pyramidal	2	279	-234.25	TSeries_47_1	318.65	-2.43699	-187	inhibitory
2018_08_15_exp1_CAB	2	pyramidal	2	279	-234.25	TSeries_227_1	842.288	0.525488	-213.69	no cnx
2018_08_15_exp1_CAB	2	pyramidal	2	279	-234.25	TSeries_227_2	797.352	-3.01408	-213.69	no cnx
2018_08_15_exp1_CAB	2	pyramidal	2	279	-234.25	TSeries_167_1	272.647	204.268	-277.14	no cnx
2018_08_15_exp1_CAB	2	pyramidal	2	279	-234.25	TSeries_587_1	925.587	30.6361	-173.95	no cnx
2018_08_15_exp1_CAB	2	pyramidal	2	279	-234.25	TSeries_407_1	926.64	-63.1664	-185.25	no cnx
2018_08_15_exp1_CAB	2	pyramidal	2	279	-234.25	TSeries_407_3	759.263	-126.079	-185.25	no cnx
2018_08_15_exp1_CAB	2	pyramidal	2	279	-234.25	TSeries_407_2	887.487	-143.904	-185.25	no cnx
2018_08_14_exp5_TH	1	pyramidal	2	212	-442.26	TSeries_127_1	654.963	17.4636	-361.41	inhibitory
2018_08_14_exp5_TH	1	pyramidal	2	212	-442.26	TSeries_67_2	573.139	-55.0361	-366.58	no cnx
2018_08_14_exp5_TH	1	pyramidal	2	212	-442.26	TSeries_67_1	618.333	-150.235	-366.58	no cnx
2018_08_14_exp5_TH	1	pyramidal	2	212	-442.26	TSeries_147_1	671.366	19.9904	-400.73	no cnx
2018_08_14_exp5_TH	1	pyramidal	2	212	-442.26	TSeries_167_1	717.371	-143.393	-417.59	no cnx
2018_08_14_exp5_TH	1	pyramidal	2	212	-442.26	TSeries_27_1	215.986	-77.7762	-420.51	inhibitory
2018_08_14_exp3_TH	1	pyramidal	2	317	-442.42	TSeries_67_1	307.936	-72.8122	-458.67	no cnx
2018_08_14_exp2_TH	1	pyramidal	2	169	-563.17	TSeries_49_1	207.628	10.3916	-546.02	inhibitory
2018_08_14_exp2_TH	1	pyramidal	2	169	-563.17	TSeries_110_1	293.579	-220.659	-476.68	no cnx
2018_08_14_exp2_TH	1	pyramidal	2	169	-563.17	TSeries_131_2	225.854	-69.8493	-515.26	no cnx
2018_08_14_exp2_TH	1	pyramidal	2	169	-563.17	TSeries_131_1	375.289	-103.48	-515.26	no cnx
2018_08_14_exp2_TH	1	pyramidal	2	169	-563.17	TSeries_69_1	39.7959	-115.686	-510.59	no cnx
2018_08_14_exp2_CAB	2	pyramidal	2	202	-254.29	TSeries_167_2	581.298	-8.32932	-376.98	no cnx
2018_08_14_exp2_CAB	2	pyramidal	2	202	-254.29	TSeries_167_1	550.784	106.904	-376.98	no cnx
2018_08_14_exp2_CAB	2	pyramidal	2	202	-254.29	TSeries_407_1	706.123	66.8313	-391.04	no cnx
2018_08_14_exp2_CAB	2	pyramidal	2	202	-254.29	TSeries_107_1	254.696	-331.875	-300.43	no cnx
2018_08_14_exp2_CAB	2	pyramidal	2	202	-254.29	TSeries_87_1	373.813	-176.6	-320.32	no cnx
2018_08_14_exp2_CAB	2	pyramidal	2	202	-254.29	TSeries_287_1	605.214	163.819	-351.94	no cnx
2018_08_14_exp2_CAB	2	pyramidal	2	202	-254.29	TSeries_507_1	772.245	177.674	-319.59	no cnx
2018_08_14_exp2_CAB	2	pyramidal	2	202	-254.29	TSeries_613_1	646.197	-29.4102	-462.86	no cnx
2018_08_14_exp2_CAB	2	pyramidal	2	202	-254.29	TSeries_387_1	602.441	133.952	-283.25	no cnx
2018_08_14_exp2_CAB	2	pyramidal	2	202	-254.29	TSeries_467_2	712.878	2.56683	-338.08	no cnx
2018_08_14_exp2_CAB	2	pyramidal	2	202	-254.29	TSeries_467_1	771.331	118.718	-338.08	no cnx
2018_08_14_exp2_CAB	2	pyramidal	2	202	-254.29	TSeries_533_1	760.127	99.251	-314.34	no cnx
2018_08_14_exp2_CAB	2	pyramidal	2	202	-254.29	TSeries_533_2	650.907	69.4717	-314.34	no cnx
2018_08_14_exp2_CAB	2	pyramidal	2	202	-254.29	TSeries_593_1	639.258	154.165	-307.55	no cnx
2018_08_14_exp2_CAB	2	pyramidal	2	202	-254.29	TSeries_653_1	701.261	-199.785	-383.89	no cnx
2018_08_14_exp2_CAB	2	pyramidal	2	202	-254.29	TSeries_307_2	535.315	-9.11699	-297.21	no cnx
2018_08_14_exp2_CAB	2	pyramidal	2	202	-254.29	TSeries_307_1	579.031	151.731	-297.21	no cnx
2018_08_14_exp2_CAB	2	pyramidal	2	202	-254.29	TSeries_27_1	272.386	7.63105	-263.52	inhibitory
2018_08_14_exp2_CAB	2	pyramidal	2	202	-254.29	TSeries_147_1	196.248	321.966	-192.79	no cnx
2018_08_14_exp2_CAB	2	pyramidal	2	202	-254.29	TSeries_633_1	647.342	-96.265	-405.13	no cnx
2018_08_14_exp2_CAB	2	pyramidal	2	202	-254.29	TSeries_427_1	741.429	179.555	-359	no cnx
2018_08_14_exp1_TH	0	pyramidal	2	146	-580.89	TSeries_107_1	676.572	220.311	-581.97	no cnx
2018_08_14_exp1_TH	0	pyramidal	2	146	-580.89	TSeries_107_2	624.832	122.61	-581.97	no cnx
2018_08_14_exp1_TH	0	pyramidal	2	146	-580.89	TSeries_107_3	648.073	375.904	-581.97	no cnx
2018_08_14_exp1_TH	0	pyramidal	2	146	-580.89	TSeries_87_1	535.535	261.396	-588.05	no cnx
2018_08_14_exp1_TH	0	pyramidal	2	146	-580.89	TSeries_27_2	159.678	212.205	-558.8	no cnx
2018_08_14_exp1_TH	0	pyramidal	2	146	-580.89	TSeries_27_1	165.795	-23.41	-558.8	inhibitory
2018_08_14_exp1_CAB	1	pyramidal	2	79	-242.71	TSeries_86_1	170.528	269.321	-228.18	no cnx
2018_08_14_exp1_CAB	1	pyramidal	2	79	-242.71	TSeries_506_1	469.504	11.2955	-413.93	no cnx
2018_08_14_exp1_CAB	1	pyramidal	2	79	-242.71	TSeries_506_2	635.167	133.555	-413.93	no cnx
2018_08_14_exp1_CAB	1	pyramidal	2	79	-242.71	TSeries_206_1	159.426	212.421	-117.98	no cnx
2018_08_14_exp1_CAB	1	pyramidal	2	79	-242.71	TSeries_386_1	148.839	81.6183	-194.91	no cnx
2018_08_14_exp1_CAB	1	pyramidal	2	79	-242.71	TSeries_326_1	231.568	-57.488	-239.95	no cnx
2018_08_14_exp1_CAB	1	pyramidal	2	79	-242.71	TSeries_446_1	100.397	-4.22975	-166.16	inhibitory
2018_08_14_exp1_CAB	1	pyramidal	2	79	-242.71	TSeries_26_1	192.389	-175.804	-224.05	no cnx
2018_08_14_exp1_CAB	1	pyramidal	2	79	-242.71	TSeries_306_1	157.269	44.6611	-336.71	no cnx
2018_08_14_exp1_CAB	1	pyramidal	2	79	-242.71	TSeries_146_1	168.833	105.372	-160.88	no cnx
2018_08_14_exp1_CAB	1	pyramidal	2	79	-242.71	TSeries_246_1	112.161	104.878	-91.16	no cnx
2018_08_14_exp1_CAB	1	pyramidal	2	79	-242.71	TSeries_586_1	545.827	-42.2007	-365.71	no cnx
2018_07_31_exp3_TH	1	pyramidal	2	197	828.596	TSeries_28_1	247.579	62.3591	833.866	inhibitory
2018_07_31_exp3_TH	1	pyramidal	2	197	828.596	TSeries_108_1	199.329	-20.4428	806.046	no cnx
2018_07_31_exp2_TH	1	pyramidal	2	176	748.096	TSeries_188_1	483.705	-182.358	784.586	no cnx
2018_07_31_exp2_TH	1	pyramidal	2	176	748.096	TSeries_28_1	203.845	-114.041	779.486	inhibitory
2018_07_31_exp2_TH	1	pyramidal	2	176	748.096	TSeries_308_1	314.341	-326.096	767.336	no cnx
2018_07_31_exp2_TH	1	pyramidal	2	176	748.096	TSeries_228_2	733.965	17.4321	838.966	no cnx
2018_07_31_exp2_TH	1	pyramidal	2	176	748.096	TSeries_228_1	802.998	-174.781	838.966	no cnx
2018_07_31_exp2_TH	1	pyramidal	2	176	748.096	TSeries_428_1	279.454	-297.64	793.336	no cnx
2018_07_31_exp2_TH	1	pyramidal	2	176	748.096	TSeries_148_1	303.338	-187.359	757.956	no cnx
2018_07_31_exp2_TH	1	pyramidal	2	176	748.096	TSeries_108_1	224.586	60.6401	751.296	inhibitory
2018_07_31_exp1_TH	1	pyramidal	2	220	850.826	TSeries_28_1	283.29	33.5444	857.766	inhibitory
2018_07_31_exp1_TH	1	pyramidal	2	220	850.826	TSeries_229_1	778.527	365.935	833.006	no cnx
2018_07_31_exp1_TH	1	pyramidal	2	220	850.826	TSeries_429_1	987.937	680.117	793.656	no cnx
2018_07_31_exp1_TH	1	pyramidal	2	220	850.826	TSeries_149_1	242.581	-73.2941	794.106	inhibitory
2018_07_31_exp1_TH	1	pyramidal	2	220	850.826	TSeries_349_1	863.397	704.219	787.496	no cnx
2018_07_31_exp1_TH	1	pyramidal	2	220	850.826	TSeries_349_2	951.821	734.458	787.496	no cnx
2018_07_31_exp1_TH	1	pyramidal	2	220	850.826	TSeries_269_2	943.675	562.574	807.646	no cnx
2018_07_31_exp1_TH	1	pyramidal	2	220	850.826	TSeries_269_1	793.767	530.328	807.646	no cnx
2018_07_31_exp1_TH	1	pyramidal	2	220	850.826	TSeries_68_1	276.28	-21.8144	873.166	inhibitory
2018_07_30_exp3_TH	1	pyramidal	2	210	453.756	TSeries_307_1	351.742	66.2512	557.016	no cnx
2018_07_30_exp3_TH	1	pyramidal	2	210	453.756	TSeries_347_2	535.427	-167.683	536.486	no cnx
2018_07_30_exp3_TH	1	pyramidal	2	210	453.756	TSeries_347_1	481.45	-203.025	536.486	no cnx
2018_07_30_exp3_TH	1	pyramidal	2	210	453.756	TSeries_427_1	515.767	-302.219	548.066	no cnx
2018_07_30_exp3_TH	1	pyramidal	2	210	453.756	TSeries_27_2	218.294	-0.244007	476.266	inhibitory
2018_07_30_exp3_TH	1	pyramidal	2	210	453.756	TSeries_27_1	197.293	-80.596	476.266	inhibitory
2018_07_30_exp3_TH	1	pyramidal	2	210	453.756	TSeries_227_1	377.755	-92.3358	542.566	no cnx
2018_07_30_exp3_TH	1	pyramidal	2	210	453.756	TSeries_227_2	356.878	-59.627	542.566	no cnx
2018_07_30_exp2_TH	1	pyramidal	2	254	846.496	TSeries_170_1	795.23	115.626	828.316	no cnx
2018_07_30_exp2_TH	1	pyramidal	2	254	846.496	TSeries_130_1	653.995	32.5638	844.376	no cnx
2018_07_30_exp2_TH	1	pyramidal	2	254	846.496	TSeries_410_1	901.208	716.476	803.126	no cnx
2018_07_30_exp2_TH	1	pyramidal	2	254	846.496	TSeries_330_1	834.768	553.438	809.086	no cnx
2018_07_30_exp2_TH	1	pyramidal	2	254	846.496	TSeries_330_2	644.758	451.879	809.086	no cnx
2018_07_30_exp2_TH	1	pyramidal	2	254	846.496	TSeries_110_1	224.763	-0.981179	839.006	inhibitory
2018_07_30_exp2_TH	1	pyramidal	2	254	846.496	TSeries_250_2	740.407	385.147	804.176	no cnx
2018_07_30_exp2_TH	1	pyramidal	2	254	846.496	TSeries_250_1	835.472	438.574	804.176	no cnx
2018_07_30_exp2_TH	1	pyramidal	2	254	846.496	TSeries_210_1	839.571	329.845	831.936	no cnx
2018_07_30_exp1_TH	0	pyramidal	2	222	801.966	TSeries_172_1	619.291	47.491	835.756	no cnx
2018_07_30_exp1_TH	0	pyramidal	2	222	801.966	TSeries_296_1	503.954	376.771	857.266	no cnx
2018_07_30_exp1_TH	0	pyramidal	2	222	801.966	TSeries_336_2	538.77	491.779	839.966	no cnx
2018_07_30_exp1_TH	0	pyramidal	2	222	801.966	TSeries_336_1	605.117	315.881	839.966	no cnx
2018_07_30_exp1_TH	0	pyramidal	2	222	801.966	TSeries_132_1	676.997	140.532	809.946	no cnx
2018_07_30_exp1_TH	0	pyramidal	2	222	801.966	TSeries_32_1	177.759	113.31	816.736	no cnx
2018_07_30_exp1_TH	0	pyramidal	2	222	801.966	TSeries_92_1	191.561	185.252	810.536	no cnx
2018_07_30_exp1_TH	0	pyramidal	2	222	801.966	TSeries_256_1	714.979	486.539	798.756	no cnx
2018_07_30_exp1_TH	0	pyramidal	2	222	801.966	TSeries_215_1	904.354	160.67	815.646	no cnx
2018_07_24_exp3_TH	0	pyramidal	2	231	751.736	TSeries_107_1	304.028	-12.1334	806.066	inhibitory
2018_07_24_exp3_TH	0	pyramidal	2	231	751.736	TSeries_67_1	231.006	72.7186	752.026	no cnx
2018_07_24_exp3_TH	0	pyramidal	2	231	751.736	TSeries_147_1	315.696	-24.2143	738.526	no cnx
2018_07_24_exp2_TH	0	pyramidal	2	191	673.296	TSeries_287_1	576.857	304.609	677.926	no cnx
2018_07_24_exp2_TH	0	pyramidal	2	191	673.296	TSeries_447_1	866.157	829.347	752.416	no cnx
2018_07_24_exp2_TH	0	pyramidal	2	191	673.296	TSeries_447_2	737.907	761.947	752.416	no cnx
2018_07_24_exp2_TH	0	pyramidal	2	191	673.296	TSeries_327_1	606.324	591.472	739.756	no cnx
2018_07_24_exp2_TH	0	pyramidal	2	191	673.296	TSeries_207_1	678.355	141.519	742.836	no cnx
2018_07_24_exp2_TH	0	pyramidal	2	191	673.296	TSeries_648_1	923.188	-80.3698	755.086	no cnx
2018_07_24_exp2_TH	0	pyramidal	2	191	673.296	TSeries_527_2	730.304	60.4831	690.816	no cnx
2018_07_24_exp2_TH	0	pyramidal	2	191	673.296	TSeries_527_1	898.21	70.8781	690.816	no cnx
2018_07_24_exp2_TH	0	pyramidal	2	191	673.296	TSeries_107_1	172.123	-85.7136	722.766	inhibitory
2018_07_24_exp2_TH	0	pyramidal	2	191	673.296	TSeries_67_1	300.341	34.0777	685.506	no cnx
2018_07_24_exp2_TH	0	pyramidal	2	191	673.296	TSeries_367_1	815.055	718.335	729.946	no cnx
2018_07_24_exp2_TH	0	pyramidal	2	191	673.296	TSeries_247_1	720.915	252.725	711.826	no cnx
2018_07_24_exp2_TH	0	pyramidal	2	191	673.296	TSeries_688_1	924.369	-667.791	683.036	no cnx
2018_07_24_exp2_TH	0	pyramidal	2	191	673.296	TSeries_407_1	821.05	742.84	709.656	no cnx
2018_07_24_exp2_TH	0	pyramidal	2	191	673.296	TSeries_27_1	151.576	127.96	703.086	no cnx
2018_07_24_exp1_TH	0	pyramidal	2	171	669.016	TSeries_221_1	944.126	-152.105	530.536	no cnx
2018_07_24_exp1_TH	0	pyramidal	2	171	669.016	TSeries_0_1	142.516	-183.676	708.656	inhibitory
2018_07_24_exp1_TH	0	pyramidal	2	171	669.016	TSeries_61_1	177.306	-75.6981	693.736	no cnx
2018_07_24_exp1_TH	0	pyramidal	2	171	669.016	TSeries_261_1	909.982	243.383	602.646	no cnx
2018_07_24_exp1_TH	0	pyramidal	2	171	669.016	TSeries_101_1	781.437	-273.727	611.566	no cnx
2018_07_24_exp1_TH	0	pyramidal	2	171	669.016	TSeries_141_1	808.911	-164.894	618.506	no cnx
2018_07_24_exp1_TH	0	pyramidal	2	171	669.016	TSeries_181_1	989.515	-95.5949	549.626	no cnx

## Sheet: Figure6B_Pcnx_pia
Pvalb_con_bins	80	180	280	380	480	580	680	780	880	980
Pvalb_con_midX	130	230	330	430	530	630	730	830	930
Pvalb_con_probed_hist	28	78	112	148	140	92	31	14	0
Pvalb_con_inh_hist	8	19	25	19	1	1	0	0	0
Pvalb_con_inh_frac	0.285714	0.24359	0.223214	0.128378	0.00714286	0.0108696	0	0	nan
Pvalb_con_inh_ci_low	0.145363	0.158818	0.153771	0.0818104	0.00077178	0.00117531	1.57125e-05	3.44527e-05	0.00154133
Pvalb_con_inh_ci_high	0.467837	0.346985	0.306748	0.189301	0.032894	0.0496699	0.07723	0.161553	0.998459
SstAAV_con_bins	80	180	280	380	480	580	680	780	880	980
SstAAV_con_midX	130	230	330	430	530	630	730	830	930
SstAAV_con_probed_hist	40	109	132	176	150	81	54	4	1
SstAAV_con_inh_hist	4	32	40	35	15	1	0	0	0
SstAAV_con_inh_frac	0.1	0.293578	0.30303	0.198864	0.1	0.0123457	0	0	0
SstAAV_con_inh_ci_low	0.0347068	0.214319	0.229539	0.145078	0.0596261	0.00133531	9.05119e-06	0.000115333	0.000385581
SstAAV_con_inh_ci_high	0.220448	0.383634	0.385053	0.262457	0.155611	0.0562426	0.0452462	0.444763	0.853254
SstAi167_con_bins	80	180	280	380	480	580	680	780	880	980
SstAi167_con_midX	130	230	330	430	530	630	730	830	930
SstAi167_con_probed_hist	18	41	17	14	24	37	36	9	9
SstAi167_con_inh_hist	6	18	3	2	1	2	0	0	0
SstAi167_con_inh_frac	0.333333	0.439024	0.176471	0.142857	0.0416667	0.0540541	0	0	0
SstAi167_con_inh_ci_low	0.152846	0.29558	0.0523477	0.0309221	0.00453319	0.0114016	1.35454e-05	5.30641e-05	5.30641e-05
SstAi167_con_inh_ci_high	0.562806	0.590747	0.400123	0.384894	0.178695	0.16229	0.0669445	0.23761	0.23761

## Sheet: Fig6C_Pcnx_horiz_L23PC
L23Pvalb_L23PC_bins	0	100	200	300	400
L23Pvalb_L23PC_midX	50	150	250	350
L23Pvalb_L23PC_probed_hist	88	68	34	17
L23Pvalb_L23PC_inh_hist	25	10	3	0
L23Pvalb_L23PC_inh_frac	0.284091	0.147059	0.0882353	0
L23Pvalb_L23PC_inh_ci_low	0.197956	0.0781954	0.0254826	2.85e-05
L23Pvalb_L23PC_inh_ci_high	0.384163	0.245184	0.217113	0.135478
L4Pvalb_L23PC_bins	0	100	200	300	400
L4Pvalb_L23PC_midX	50	150	250	350
L4Pvalb_L23PC_probed_hist	151	59	67	43
L4Pvalb_L23PC_inh_hist	31	5	1	0
L4Pvalb_L23PC_inh_frac	0.205298	0.0847458	0.0149254	0
L4Pvalb_L23PC_inh_ci_low	0.146824	0.033076	0.00161516	1.13531e-05
L4Pvalb_L23PC_inh_ci_high	0.274942	0.175786	0.0676321	0.0564227
L5Pvalb_L23PC_bins	0	100	200	300	400
L5Pvalb_L23PC_midX	50	150	250	350
L5Pvalb_L23PC_probed_hist	159	100	53	20
L5Pvalb_L23PC_inh_hist	1	1	0	0
L5Pvalb_L23PC_inh_frac	0.00628931	0.01	0	0
L5Pvalb_L23PC_inh_ci_low	0.000679441	0.0010811	9.22116e-06	2.42465e-05
L5Pvalb_L23PC_inh_ci_high	0.0290147	0.0457789	0.046076	0.116639
L23SstAAV_L23PC_bins	0	100	200	300	400
L23SstAAV_L23PC_midX	50	150	250	350
L23SstAAV_L23PC_probed_hist	116	95	45	26
L23SstAAV_L23PC_inh_hist	44	16	1	0
L23SstAAV_L23PC_inh_frac	0.37931	0.168421	0.0222222	0
L23SstAAV_L23PC_inh_ci_low	0.294863	0.103629	0.00240828	1.87051e-05
L23SstAAV_L23PC_inh_ci_high	0.469697	0.253046	0.0991885	0.0912466
L4SstAAV_L23PC_bins	0	100	200	300	400
L4SstAAV_L23PC_midX	50	150	250	350
L4SstAAV_L23PC_probed_hist	148	100	51	23
L4SstAAV_L23PC_inh_hist	37	14	2	0
L4SstAAV_L23PC_inh_frac	0.25	0.14	0.0392157	0
L4SstAAV_L23PC_inh_ci_low	0.185537	0.082566	0.00823745	2.11183e-05
L4SstAAV_L23PC_inh_ci_high	0.324131	0.217898	0.119898	0.102394
L5SstAAV_L23PC_bins	0	100	200	300	400
L5SstAAV_L23PC_midX	50	150	250	350
L5SstAAV_L23PC_probed_hist	158	110	50	27
L5SstAAV_L23PC_inh_hist	12	4	0	0
L5SstAAV_L23PC_inh_frac	0.0759494	0.0363636	0	0
L5SstAAV_L23PC_inh_ci_low	0.0421882	0.0123965	9.77166e-06	1.80187e-05
L5SstAAV_L23PC_inh_ci_high	0.125042	0.0841305	0.0487585	0.0880508
L23SstAi167_L23PC_bins	0	100	200	300	400
L23SstAi167_L23PC_midX	50	150	250	350
L23SstAi167_L23PC_probed_hist	52	20	15	7
L23SstAi167_L23PC_inh_hist	24	3	0	0
L23SstAi167_L23PC_inh_frac	0.461538	0.15	0	0
L23SstAi167_L23PC_inh_ci_low	0.331191	0.0441313	3.21941e-05	6.76865e-05
L23SstAi167_L23PC_inh_ci_high	0.596037	0.348578	0.151817	0.292436
L4SstAi167_L23PC_bins	0	100	200	300	400
L4SstAi167_L23PC_midX	50	150	250	350
L4SstAi167_L23PC_probed_hist	12	7	4	4
L4SstAi167_L23PC_inh_hist	1	1	0	0
L4SstAi167_L23PC_inh_frac	0.0833333	0.142857	0	0
L4SstAi167_L23PC_inh_ci_low	0.00914433	0.0158765	0.000115333	0.000115333
L4SstAi167_L23PC_inh_ci_high	0.328496	0.500797	0.444763	0.444763
L5SstAi167_L23PC_bins	0	100	200	300	400
L5SstAi167_L23PC_midX	50	150	250	350
L5SstAi167_L23PC_probed_hist	48	44	38	27
L5SstAi167_L23PC_inh_hist	1	2	0	0
L5SstAi167_L23PC_inh_frac	0.0208333	0.0454545	0	0
L5SstAi167_L23PC_inh_ci_low	0.00225714	0.00956461	1.28371e-05	1.80187e-05
L5SstAi167_L23PC_inh_ci_high	0.0932563	0.137915	0.0635583	0.0880508

## Sheet: Figure6D_SstAAV_L23fsi_map
exp_id	headstage	post_class	post_layer	postPia	post_z	MP_ID	prePia	x_ap	pre_z	cnx
2020_10_22_exp1_TH	1	interneuron	2	159	344.894	Point 5	271.35	12.4754	380.204	no cnx
2020_10_22_exp1_TH	1	interneuron	2	159	344.894	Point 4	241.513	-38.0719	380.204	no cnx
2020_10_22_exp1_TH	1	interneuron	2	159	344.894	Point 6	304.225	-17.8684	328.774	inhibitory
2020_10_22_exp1_TH	1	interneuron	2	159	344.894	Point 1	220.569	170.005	383.704	no cnx
2020_10_22_exp1_TH	1	interneuron	2	159	344.894	Point 3	250.123	30.6849	328.774	inhibitory
2020_10_22_exp1_TH	1	interneuron	2	159	344.894	Point 2	194.493	146.435	383.704	no cnx
2020_09_04_exp2_TH	0	interneuron	2	206	-101.866	Point 5	173.321	-520.551	-90.046	no cnx
2020_09_04_exp2_TH	0	interneuron	2	206	-101.866	Point 4	159.834	-284.703	-138.696	no cnx
2020_09_04_exp2_TH	0	interneuron	2	206	-101.866	Point 7	382.607	201.164	-132.776	no cnx
2020_09_04_exp2_TH	0	interneuron	2	206	-101.866	Point 6	248.002	-539.426	-123.216	no cnx
2020_09_04_exp2_TH	0	interneuron	2	206	-101.866	Point 1	226.784	-9.14364	-89.386	no cnx
2020_09_04_exp2_TH	0	interneuron	2	206	-101.866	Point 3	137.68	-243.564	-120.306	no cnx
2020_09_04_exp2_TH	0	interneuron	2	206	-101.866	Point 2	227.681	-63.6163	-141.586	no cnx
2020_09_04_exp2_TH	0	interneuron	2	206	-101.866	Point 9	280.258	91.9139	-143.276	no cnx
2020_09_04_exp2_TH	0	interneuron	2	206	-101.866	Point 8	280.814	117.137	-143.276	no cnx
2020_09_04_exp2_TH	0	interneuron	2	206	-101.866	Point 11	479.574	-2.9665	-43.326	no cnx
2020_09_04_exp2_TH	0	interneuron	2	206	-101.866	Point 10	548.034	-113.01	-33.706	no cnx
2020_09_04_exp2_TH	0	interneuron	2	206	-101.866	Point 13	472.624	-146.199	-72.836	inhibitory
2020_09_04_exp2_TH	0	interneuron	2	206	-101.866	Point 12	529.661	39.5566	-72.836	no cnx
2020_09_04_exp2_TH	0	interneuron	2	206	-101.866	Point 15	434.788	-243.046	-82.406	no cnx
2020_09_04_exp2_TH	0	interneuron	2	206	-101.866	Point 14	434.69	-163.601	-82.406	no cnx
2020_09_04_exp2_TH	0	interneuron	2	206	-101.866	Point 17	488.052	-306.634	-43.266	no cnx
2020_09_04_exp2_TH	0	interneuron	2	206	-101.866	Point 16	424.159	-275.726	-43.266	no cnx
2020_09_04_exp2_TH	0	interneuron	2	206	-101.866	Point 19	364.291	-436.175	-65.926	no cnx
2020_09_04_exp2_TH	0	interneuron	2	206	-101.866	Point 18	470.521	-384.31	-53.816	no cnx
2020_09_04_exp2_TH	0	interneuron	2	206	-101.866	Point 20	519.156	-240.204	-65.926	no cnx
2020_02_26_exp2_TH	3	interneuron	2	285	-777.449	Point 11	305.688	189.604	-797.569	inhibitory
2020_02_26_exp2_TH	3	interneuron	2	285	-777.449	Point 10	379.254	326.251	-797.569	no cnx
2020_02_26_exp2_TH	3	interneuron	2	285	-777.449	Point 13	468.783	212.592	-797.569	no cnx
2020_02_26_exp2_TH	3	interneuron	2	285	-777.449	Point 12	330.751	394.131	-797.569	no cnx
2020_02_26_exp2_TH	3	interneuron	2	285	-777.449	Point 15	464.23	59.2115	-766.939	no cnx
2020_02_26_exp2_TH	3	interneuron	2	285	-777.449	Point 14	440.867	-0.0645469	-766.939	inhibitory
2020_02_26_exp2_TH	3	interneuron	2	285	-777.449	Point 17	294.426	119.41	-766.939	no cnx
2020_02_26_exp2_TH	3	interneuron	2	285	-777.449	Point 16	491.118	124.98	-766.939	no cnx
2020_02_26_exp2_TH	3	interneuron	2	285	-777.449	Point 19	403.836	-51.6373	-771.979	no cnx
2020_02_26_exp2_TH	3	interneuron	2	285	-777.449	Point 18	368.121	127.048	-771.979	no cnx
2020_02_26_exp2_TH	3	interneuron	2	285	-777.449	Point 31	512.338	-129.603	-795.109	no cnx
2020_02_26_exp2_TH	3	interneuron	2	285	-777.449	Point 30	275.456	-186.793	-795.109	inhibitory
2020_02_26_exp2_TH	3	interneuron	2	285	-777.449	Point 37	384.228	-237.641	-803.219	no cnx
2020_02_26_exp2_TH	3	interneuron	2	285	-777.449	Point 36	499.045	-232.831	-803.219	no cnx
2020_02_26_exp2_TH	3	interneuron	2	285	-777.449	Point 35	305.961	-287.953	-803.219	no cnx
2020_02_26_exp2_TH	3	interneuron	2	285	-777.449	Point 34	289.309	-151.071	-803.219	no cnx
2020_02_26_exp2_TH	3	interneuron	2	285	-777.449	Point 5	335.622	265.912	-780.299	no cnx
2020_02_26_exp2_TH	3	interneuron	2	285	-777.449	Point 4	422.609	361.431	-780.299	no cnx
2020_02_26_exp2_TH	3	interneuron	2	285	-777.449	Point 7	346.127	151.589	-780.299	no cnx
2020_02_26_exp2_TH	3	interneuron	2	285	-777.449	Point 6	285.083	195.856	-780.299	no cnx
2020_02_26_exp2_TH	3	interneuron	2	285	-777.449	Point 1	263.546	425.792	-772.689	no cnx
2020_02_26_exp2_TH	3	interneuron	2	285	-777.449	Point 3	358.139	386.681	-780.299	no cnx
2020_02_26_exp2_TH	3	interneuron	2	285	-777.449	Point 2	362.443	205.562	-772.689	no cnx
2020_02_26_exp2_TH	3	interneuron	2	285	-777.449	Point 9	331.62	328.26	-797.569	no cnx
2020_02_26_exp2_TH	3	interneuron	2	285	-777.449	Point 8	270.525	185.254	-797.569	no cnx
2020_02_26_exp2_TH	3	interneuron	2	285	-777.449	Point 32	448.276	-221.012	-795.109	no cnx
2020_02_26_exp2_TH	3	interneuron	2	285	-777.449	Point 48	519.944	-100.449	-853.559	no cnx
2020_02_26_exp2_TH	3	interneuron	2	285	-777.449	Point 42	403.615	-131.78	-838.359	no cnx
2020_02_26_exp2_TH	3	interneuron	2	285	-777.449	Point 43	407.746	-241.996	-838.359	no cnx
2020_02_26_exp2_TH	3	interneuron	2	285	-777.449	Point 40	469.065	-147.864	-827.549	no cnx
2020_02_26_exp2_TH	3	interneuron	2	285	-777.449	Point 41	324.453	-250.287	-838.359	no cnx
2020_02_26_exp2_TH	3	interneuron	2	285	-777.449	Point 46	330.313	3.57011	-853.559	inhibitory
2020_02_26_exp2_TH	3	interneuron	2	285	-777.449	Point 47	377.814	99.3719	-853.559	inhibitory
2020_02_26_exp2_TH	3	interneuron	2	285	-777.449	Point 44	381.77	-315.024	-838.359	no cnx
2020_02_26_exp2_TH	3	interneuron	2	285	-777.449	Point 45	391.158	10.2717	-853.559	no cnx
2020_02_26_exp2_TH	3	interneuron	2	285	-777.449	Point 28	498.091	161.951	-803.839	no cnx
2020_02_26_exp2_TH	3	interneuron	2	285	-777.449	Point 29	404.784	-167.807	-786.279	no cnx
2020_02_26_exp2_TH	3	interneuron	2	285	-777.449	Point 20	270.872	34.2145	-776.269	inhibitory
2020_02_26_exp2_TH	3	interneuron	2	285	-777.449	Point 21	439.221	123.781	-776.269	no cnx
2020_02_26_exp2_TH	3	interneuron	2	285	-777.449	Point 22	485.883	106.461	-797.549	no cnx
2020_02_26_exp2_TH	3	interneuron	2	285	-777.449	Point 23	256.171	-48.2116	-797.549	no cnx
2020_02_26_exp2_TH	3	interneuron	2	285	-777.449	Point 24	405.871	118.46	-803.839	no cnx
2020_02_26_exp2_TH	3	interneuron	2	285	-777.449	Point 25	445.358	48.5728	-803.839	no cnx
2020_02_26_exp2_TH	3	interneuron	2	285	-777.449	Point 26	483.629	15.9742	-803.839	no cnx
2020_02_26_exp2_TH	3	interneuron	2	285	-777.449	Point 27	469.183	183.726	-803.839	no cnx
2020_02_26_exp2_TH	3	interneuron	2	285	-777.449	Point 39	436.652	-113.713	-827.549	no cnx
2020_02_26_exp2_TH	3	interneuron	2	285	-777.449	Point 33	465.25	-189.575	-795.109	no cnx
2020_02_26_exp2_TH	3	interneuron	2	285	-777.449	Point 38	551.628	-100.987	-827.549	no cnx
2020_02_26_exp1_TH	0	interneuron	2	188	-824.839	Point 5	339.899	24.6669	-860.879	no cnx
2020_02_26_exp1_TH	0	interneuron	2	188	-824.839	Point 4	359.879	-48.7173	-860.879	no cnx
2020_02_26_exp1_TH	0	interneuron	2	188	-824.839	Point 7	464.048	-82.1403	-875.169	inhibitory
2020_02_26_exp1_TH	0	interneuron	2	188	-824.839	Point 6	417.702	82.1785	-860.879	no cnx
2020_02_26_exp1_TH	0	interneuron	2	188	-824.839	Point 1	290.429	51.7216	-802.999	no cnx
2020_02_26_exp1_TH	0	interneuron	2	188	-824.839	Point 3	237.393	-95.136	-837.149	inhibitory
2020_02_26_exp1_TH	0	interneuron	2	188	-824.839	Point 2	185.072	-47.6797	-816.169	no cnx
2020_02_26_exp1_TH	0	interneuron	2	188	-824.839	Point 9	497.083	-32.0801	-875.169	no cnx
2020_02_26_exp1_TH	0	interneuron	2	188	-824.839	Point 8	512.429	2.19606	-875.169	no cnx
2020_02_26_exp1_TH	0	interneuron	2	188	-824.839	Point 11	506.357	-95.1591	-861.099	no cnx
2020_02_26_exp1_TH	0	interneuron	2	188	-824.839	Point 10	315.385	101.884	-875.169	no cnx
2020_02_26_exp1_TH	0	interneuron	2	188	-824.839	Point 13	505.317	80.1737	-861.099	no cnx
2020_02_26_exp1_TH	0	interneuron	2	188	-824.839	Point 12	514.11	-7.08586	-861.099	inhibitory
2020_02_26_exp1_TH	0	interneuron	2	188	-824.839	Point 15	450.786	20.8989	-852.439	inhibitory
2020_02_26_exp1_TH	0	interneuron	2	188	-824.839	Point 14	433.006	-73.2071	-852.449	no cnx
2020_02_26_exp1_TH	0	interneuron	2	188	-824.839	Point 17	261.568	74.5223	-852.449	no cnx
2020_02_26_exp1_TH	0	interneuron	2	188	-824.839	Point 16	364.642	40.2363	-852.449	no cnx
2020_02_26_exp1_TH	0	interneuron	2	188	-824.839	Point 18	175.275	120.829	-857.759	no cnx
2019_02_20_exp1_TH	1	interneuron	2	197	694.736	Point 11	243.895	137.768	738.396	no cnx
2019_02_20_exp1_TH	1	interneuron	2	197	694.736	Point 10	419.278	124.064	750.036	no cnx
2019_02_20_exp1_TH	1	interneuron	2	197	694.736	Point 13	470.402	1.26287	738.396	no cnx
2019_02_20_exp1_TH	1	interneuron	2	197	694.736	Point 12	459.057	137.404	738.396	no cnx
2019_02_20_exp1_TH	1	interneuron	2	197	694.736	Point 15	455.228	183.647	730.636	no cnx
2019_02_20_exp1_TH	1	interneuron	2	197	694.736	Point 14	423.145	62.1454	730.636	no cnx
2019_02_20_exp1_TH	1	interneuron	2	197	694.736	Point 17	413.886	195.248	730.636	no cnx
2019_02_20_exp1_TH	1	interneuron	2	197	694.736	Point 16	398.532	244.632	730.636	no cnx
2019_02_20_exp1_TH	1	interneuron	2	197	694.736	Point 19	241.395	260.055	755.166	no cnx
2019_02_20_exp1_TH	1	interneuron	2	197	694.736	Point 18	369.37	287.295	755.166	no cnx
2019_02_20_exp1_TH	1	interneuron	2	197	694.736	Point 5	89.0725	43.2644	698.516	no cnx
2019_02_20_exp1_TH	1	interneuron	2	197	694.736	Point 4	225.072	61.3086	708.976	no cnx
2019_02_20_exp1_TH	1	interneuron	2	197	694.736	Point 7	325.208	131.106	757.266	no cnx
2019_02_20_exp1_TH	1	interneuron	2	197	694.736	Point 6	126.736	18.8248	698.516	no cnx
2019_02_20_exp1_TH	1	interneuron	2	197	694.736	Point 1	225.288	23.5427	723.956	no cnx
2019_02_20_exp1_TH	1	interneuron	2	197	694.736	Point 3	138.373	-77.6313	708.976	no cnx
2019_02_20_exp1_TH	1	interneuron	2	197	694.736	Point 2	263.497	149.87	723.956	no cnx
2019_02_20_exp1_TH	1	interneuron	2	197	694.736	Point 9	430.432	73.6468	750.036	no cnx
2019_02_20_exp1_TH	1	interneuron	2	197	694.736	Point 8	347.77	43.996	757.266	no cnx
2019_02_20_exp1_TH	1	interneuron	2	197	694.736	Point 20	345.431	397.506	755.166	no cnx
2019_02_20_exp1_TH	1	interneuron	2	197	694.736	Point 21	386.235	369.11	730.166	no cnx
2019_02_20_exp1_TH	1	interneuron	2	197	694.736	Point 22	185.487	372.825	730.166	no cnx
2019_02_20_exp1_TH	1	interneuron	2	197	694.736	Point 23	233.275	440.59	719.936	no cnx
2019_02_20_exp1_TH	1	interneuron	2	197	694.736	Point 24	335.011	-247.248	777.866	no cnx
2019_02_20_exp1_TH	1	interneuron	2	197	694.736	Point 25	443.573	-38.9731	777.866	no cnx
2019_02_13_exp1_TH	3	interneuron	2	287	596.206	Point 11	465.009	-79.3823	593.576	inhibitory
2019_02_13_exp1_TH	3	interneuron	2	287	596.206	Point 10	496.049	70.388	593.576	no cnx
2019_02_13_exp1_TH	3	interneuron	2	287	596.206	Point 13	589.448	-91.7189	583.706	no cnx
2019_02_13_exp1_TH	3	interneuron	2	287	596.206	Point 12	387.315	96.1753	593.576	no cnx
2019_02_13_exp1_TH	3	interneuron	2	287	596.206	Point 15	411.345	-25.1791	583.706	no cnx
2019_02_13_exp1_TH	3	interneuron	2	287	596.206	Point 14	505.091	-104.152	583.706	no cnx
2019_02_13_exp1_TH	3	interneuron	2	287	596.206	Point 17	471.414	106.303	629.046	inhibitory
2019_02_13_exp1_TH	3	interneuron	2	287	596.206	Point 16	585.353	63.3458	583.706	no cnx
2019_02_13_exp1_TH	3	interneuron	2	287	596.206	Point 19	393.416	218.751	629.046	no cnx
2019_02_13_exp1_TH	3	interneuron	2	287	596.206	Point 18	278.697	156.427	629.046	no cnx
2019_02_13_exp1_TH	3	interneuron	2	287	596.206	Point 31	334.406	-184.625	576.366	no cnx
2019_02_13_exp1_TH	3	interneuron	2	287	596.206	Point 30	289.557	-200.585	576.366	no cnx
2019_02_13_exp1_TH	3	interneuron	2	287	596.206	Point 5	484.302	-77.9017	609.976	no cnx
2019_02_13_exp1_TH	3	interneuron	2	287	596.206	Point 4	405.866	110.719	609.976	no cnx
2019_02_13_exp1_TH	3	interneuron	2	287	596.206	Point 7	508.623	-62.8785	602.436	inhibitory
2019_02_13_exp1_TH	3	interneuron	2	287	596.206	Point 6	482.281	-99.5573	602.436	no cnx
2019_02_13_exp1_TH	3	interneuron	2	287	596.206	Point 1	359.632	-45.035	626.466	no cnx
2019_02_13_exp1_TH	3	interneuron	2	287	596.206	Point 3	328.289	-51.9623	609.976	no cnx
2019_02_13_exp1_TH	3	interneuron	2	287	596.206	Point 2	406.996	-11.0801	616.456	inhibitory
2019_02_13_exp1_TH	3	interneuron	2	287	596.206	Point 9	543.57	51.667	593.576	no cnx
2019_02_13_exp1_TH	3	interneuron	2	287	596.206	Point 8	537	158.272	602.436	no cnx
2019_02_13_exp1_TH	3	interneuron	2	287	596.206	Point 32	230.533	-150.904	576.366	no cnx
2019_02_13_exp1_TH	3	interneuron	2	287	596.206	Point 28	479.441	-182.027	576.366	no cnx
2019_02_13_exp1_TH	3	interneuron	2	287	596.206	Point 29	389.566	-246.315	576.366	no cnx
2019_02_13_exp1_TH	3	interneuron	2	287	596.206	Point 20	382.884	267.524	629.046	no cnx
2019_02_13_exp1_TH	3	interneuron	2	287	596.206	Point 21	288.777	306.063	629.046	no cnx
2019_02_13_exp1_TH	3	interneuron	2	287	596.206	Point 22	324.549	132.97	617.826	no cnx
2019_02_13_exp1_TH	3	interneuron	2	287	596.206	Point 23	489.681	-170.687	617.886	no cnx
2019_02_13_exp1_TH	3	interneuron	2	287	596.206	Point 24	462.515	-237.454	593.576	no cnx
2019_02_13_exp1_TH	3	interneuron	2	287	596.206	Point 25	386.252	-196.029	593.576	no cnx
2019_02_13_exp1_TH	3	interneuron	2	287	596.206	Point 26	254.961	-103.227	593.576	no cnx
2019_02_13_exp1_TH	3	interneuron	2	287	596.206	Point 27	253.733	-234.801	593.576	no cnx
2018_12_14_exp1_TH	1	interneuron	2	277	524.106	Point 11	417.148	82.636	396.136	no cnx
2018_12_14_exp1_TH	1	interneuron	2	277	524.106	Point 10	647.485	-46.7173	423.706	no cnx
2018_12_14_exp1_TH	1	interneuron	2	277	524.106	Point 13	458.965	179.058	397.356	no cnx
2018_12_14_exp1_TH	1	interneuron	2	277	524.106	Point 12	589.341	203.738	396.136	no cnx
2018_12_14_exp1_TH	1	interneuron	2	277	524.106	Point 15	429.822	44.6974	396.136	no cnx
2018_12_14_exp1_TH	1	interneuron	2	277	524.106	Point 14	580.309	28.3255	396.136	no cnx
2018_12_14_exp1_TH	1	interneuron	2	277	524.106	Point 17	648.277	-29.2617	396.146	no cnx
2018_12_14_exp1_TH	1	interneuron	2	277	524.106	Point 16	447.814	-104.44	396.146	no cnx
2018_12_14_exp1_TH	1	interneuron	2	277	524.106	Point 5	605.886	65.8611	437.186	no cnx
2018_12_14_exp1_TH	1	interneuron	2	277	524.106	Point 4	495.742	140.976	437.186	no cnx
2018_12_14_exp1_TH	1	interneuron	2	277	524.106	Point 7	516.94	121.278	437.186	no cnx
2018_12_14_exp1_TH	1	interneuron	2	277	524.106	Point 6	511.732	36.4279	437.186	no cnx
2018_12_14_exp1_TH	1	interneuron	2	277	524.106	Point 1	512.241	22.9843	448.296	no cnx
2018_12_14_exp1_TH	1	interneuron	2	277	524.106	Point 3	468.313	23.2107	437.186	no cnx
2018_12_14_exp1_TH	1	interneuron	2	277	524.106	Point 2	474.193	-122.081	448.296	no cnx
2018_12_14_exp1_TH	1	interneuron	2	277	524.106	Point 9	516.821	119.604	423.706	no cnx
2018_12_14_exp1_TH	1	interneuron	2	277	524.106	Point 8	491.182	29.226	437.196	no cnx

## Sheet: Figure6D_PvalbAAV_L23fsi_map
exp_id	headstage	post_class	post_layer	postPia	post_z	MP_ID	prePia	x_ap	pre_z	cnx
2020_11_20_exp1_TH	3	interneuron	2	285	598.144	Point 11	440.538	242.142	603.894	no cnx
2020_11_20_exp1_TH	3	interneuron	2	285	598.144	Point 10	354.017	223.124	603.894	no cnx
2020_11_20_exp1_TH	3	interneuron	2	285	598.144	Point 13	379.001	265.124	622.194	no cnx
2020_11_20_exp1_TH	3	interneuron	2	285	598.144	Point 12	425.747	278.643	603.894	no cnx
2020_11_20_exp1_TH	3	interneuron	2	285	598.144	Point 15	525.905	224.036	622.194	no cnx
2020_11_20_exp1_TH	3	interneuron	2	285	598.144	Point 14	484.057	271.596	622.194	no cnx
2020_11_20_exp1_TH	3	interneuron	2	285	598.144	Point 17	505.252	138.677	633.554	inhibitory
2020_11_20_exp1_TH	3	interneuron	2	285	598.144	Point 16	494.599	242.336	633.554	no cnx
2020_11_20_exp1_TH	3	interneuron	2	285	598.144	Point 19	609.37	172.416	633.554	no cnx
2020_11_20_exp1_TH	3	interneuron	2	285	598.144	Point 18	562.512	203.519	633.554	no cnx
2020_11_20_exp1_TH	3	interneuron	2	285	598.144	Point 5	306.968	27.0725	630.484	no cnx
2020_11_20_exp1_TH	3	interneuron	2	285	598.144	Point 4	328.466	-109.888	593.854	no cnx
2020_11_20_exp1_TH	3	interneuron	2	285	598.144	Point 7	347.852	47.7866	567.024	no cnx
2020_11_20_exp1_TH	3	interneuron	2	285	598.144	Point 6	348.43	-50.274	568.904	inhibitory
2020_11_20_exp1_TH	3	interneuron	2	285	598.144	Point 1	164.393	-35.7242	593.854	no cnx
2020_11_20_exp1_TH	3	interneuron	2	285	598.144	Point 3	316.69	-133.066	593.854	inhibitory
2020_11_20_exp1_TH	3	interneuron	2	285	598.144	Point 9	239.488	236.64	585.014	no cnx
2020_11_20_exp1_TH	3	interneuron	2	285	598.144	Point 8	360.654	109.004	567.024	inhibitory
2020_11_20_exp1_TH	3	interneuron	2	285	598.144	Point 20	638.31	68.8584	633.554	no cnx
2020_11_20_exp1_TH	3	interneuron	2	285	598.144	Point 21	620.321	176.134	633.554	no cnx
2020_11_20_exp1_TH	3	interneuron	2	285	598.144	Point 22	487.62	-253.789	620.914	no cnx
2020_11_20_exp1_TH	3	interneuron	2	285	598.144	Point 23	492.191	-212.733	620.914	no cnx
2020_11_20_exp1_TH	3	interneuron	2	285	598.144	Point 24	570.577	-154.883	620.914	no cnx
2020_09_03_exp2_TH	3	interneuron	2	70	-84.186	Point 5	139.104	41.4471	-98.576	no cnx
2020_09_03_exp2_TH	3	interneuron	2	70	-84.186	Point 4	195.214	220.571	-117.346	inhibitory
2020_09_03_exp2_TH	3	interneuron	2	70	-84.186	Point 7	197.849	-20.7842	-98.576	no cnx
2020_09_03_exp2_TH	3	interneuron	2	70	-84.186	Point 1	85.4188	285.958	-79.746	inhibitory
2020_09_03_exp2_TH	3	interneuron	2	70	-84.186	Point 3	101.432	165.638	-90.906	inhibitory
2020_09_03_exp2_TH	3	interneuron	2	70	-84.186	Point 2	155.17	320.545	-90.906	no cnx
2020_09_03_exp2_TH	3	interneuron	2	70	-84.186	Point 9	150.822	434.905	-84.196	no cnx
2020_09_03_exp2_TH	3	interneuron	2	70	-84.186	Point 8	84.8311	-52.7849	-122.396	inhibitory
2020_09_03_exp2_TH	3	interneuron	2	70	-84.186	Point 11	241.561	620.344	-110.256	no cnx
2020_09_03_exp2_TH	3	interneuron	2	70	-84.186	Point 10	276.744	621.94	-84.196	no cnx
2020_09_03_exp2_TH	2	interneuron	2	86	-88.6456	Point 5	135.895	-116.089	-98.576	no cnx
2020_09_03_exp2_TH	2	interneuron	2	86	-88.6456	Point 4	192.005	63.0353	-117.346	inhibitory
2020_09_03_exp2_TH	2	interneuron	2	86	-88.6456	Point 7	194.641	-178.32	-98.576	no cnx
2020_09_03_exp2_TH	2	interneuron	2	86	-88.6456	Point 6	76.705	-151.251	-98.576	direct
2020_09_03_exp2_TH	2	interneuron	2	86	-88.6456	Point 1	82.2101	128.423	-79.746	inhibitory
2020_09_03_exp2_TH	2	interneuron	2	86	-88.6456	Point 2	151.962	163.009	-90.906	no cnx
2020_09_03_exp2_TH	2	interneuron	2	86	-88.6456	Point 9	147.614	277.369	-84.196	no cnx
2020_09_03_exp2_TH	2	interneuron	2	86	-88.6456	Point 8	81.6224	-210.321	-122.396	inhibitory
2020_09_03_exp2_TH	2	interneuron	2	86	-88.6456	Point 11	238.352	462.808	-110.256	no cnx
2020_09_03_exp2_TH	2	interneuron	2	86	-88.6456	Point 10	273.535	464.404	-84.196	no cnx
2020_09_03_exp2_TH	1	interneuron	2	69	-73.656	Point 5	135.227	-234.972	-98.576	no cnx
2020_09_03_exp2_TH	1	interneuron	2	69	-73.656	Point 4	191.337	-55.8478	-117.346	inhibitory
2020_09_03_exp2_TH	1	interneuron	2	69	-73.656	Point 7	193.972	-297.203	-98.576	no cnx
2020_09_03_exp2_TH	1	interneuron	2	69	-73.656	Point 6	76.0367	-270.134	-98.576	no cnx
2020_09_03_exp2_TH	1	interneuron	2	69	-73.656	Point 3	97.5546	-110.781	-90.906	direct
2020_09_03_exp2_TH	1	interneuron	2	69	-73.656	Point 2	151.293	44.1256	-90.906	no cnx
2020_09_03_exp2_TH	1	interneuron	2	69	-73.656	Point 9	146.945	158.486	-84.196	no cnx
2020_09_03_exp2_TH	1	interneuron	2	69	-73.656	Point 8	80.9542	-329.204	-122.396	no cnx
2020_09_03_exp2_TH	1	interneuron	2	69	-73.656	Point 11	237.684	343.925	-110.256	no cnx
2020_09_03_exp2_TH	1	interneuron	2	69	-73.656	Point 10	272.867	345.521	-84.196	no cnx
2020_09_03_exp1_TH	3	interneuron	2	256	106.054	Point 5	274.515	-8.79845	97.284	direct
2020_09_03_exp1_TH	3	interneuron	2	256	106.054	Point 4	332.208	-3.02848	108.344	no cnx
2020_09_03_exp1_TH	3	interneuron	2	256	106.054	Point 1	300.084	-50.7194	112.054	direct
2020_09_03_exp1_TH	3	interneuron	2	256	106.054	Point 3	365.955	-153.425	112.064	no cnx
2020_09_03_exp1_TH	3	interneuron	2	256	106.054	Point 2	311.265	-102.642	112.064	inhibitory
2020_09_03_exp1_TH	0	interneuron	2	229	112.014	Point 11	183.97	-238.211	73.244	no cnx
2020_09_03_exp1_TH	0	interneuron	2	229	112.014	Point 10	208.752	-75.5916	94.244	inhibitory
2020_09_03_exp1_TH	0	interneuron	2	229	112.014	Point 13	162.974	-139.78	73.244	no cnx
2020_09_03_exp1_TH	0	interneuron	2	229	112.014	Point 12	252.723	-135.799	73.244	inhibitory
2020_09_03_exp1_TH	0	interneuron	2	229	112.014	Point 15	261.037	20.8278	65.234	direct
2020_09_03_exp1_TH	0	interneuron	2	229	112.014	Point 14	159.729	-4.6144	118.064	no cnx
2020_09_03_exp1_TH	0	interneuron	2	229	112.014	Point 17	72.6058	-61.4083	65.234	no cnx
2020_09_03_exp1_TH	0	interneuron	2	229	112.014	Point 16	242.174	-73.6895	65.234	no cnx
2020_09_03_exp1_TH	0	interneuron	2	229	112.014	Point 19	288.337	-86.0724	65.234	no cnx
2020_09_03_exp1_TH	0	interneuron	2	229	112.014	Point 18	199.501	56.4445	65.234	direct
2020_09_03_exp1_TH	0	interneuron	2	229	112.014	Point 5	274.74	100.49	97.284	inhibitory
2020_09_03_exp1_TH	0	interneuron	2	229	112.014	Point 4	332.432	106.26	108.344	no cnx
2020_09_03_exp1_TH	0	interneuron	2	229	112.014	Point 7	319.894	53.4481	73.984	inhibitory
2020_09_03_exp1_TH	0	interneuron	2	229	112.014	Point 6	280.687	5.06929	73.984	direct
2020_09_03_exp1_TH	0	interneuron	2	229	112.014	Point 1	300.308	58.5693	112.054	direct
2020_09_03_exp1_TH	0	interneuron	2	229	112.014	Point 3	366.179	-44.1361	112.064	inhibitory
2020_09_03_exp1_TH	0	interneuron	2	229	112.014	Point 2	311.489	6.64651	112.064	inhibitory
2020_09_03_exp1_TH	0	interneuron	2	229	112.014	Point 9	281.969	-162.694	106.444	no cnx
2020_09_03_exp1_TH	0	interneuron	2	229	112.014	Point 8	284.861	19.0413	73.984	direct
2020_09_03_exp1_TH	0	interneuron	2	229	112.014	Point 20	348.436	232.09	112.974	inhibitory
2020_09_03_exp1_TH	0	interneuron	2	229	112.014	Point 21	232.873	227.777	112.974	no cnx
2020_09_03_exp1_TH	0	interneuron	2	229	112.014	Point 22	335.92	279.596	112.974	no cnx
2020_07_26_exp3_TH	2	interneuron	2	160	314.974	Point 5	270.219	-96.5092	331.444	inhibitory
2020_07_26_exp3_TH	2	interneuron	2	160	314.974	Point 4	440.805	-18.3488	342.244	no cnx
2020_07_26_exp3_TH	2	interneuron	2	160	314.974	Point 7	327.387	-39.3478	331.444	inhibitory
2020_07_26_exp3_TH	2	interneuron	2	160	314.974	Point 6	399.618	-70.4158	331.444	no cnx
2020_07_26_exp3_TH	2	interneuron	2	160	314.974	Point 3	440.711	-37.5012	342.244	no cnx
2020_07_26_exp3_TH	2	interneuron	2	160	314.974	Point 2	324.103	-105.157	342.244	no cnx
2020_07_26_exp3_TH	2	interneuron	2	160	314.974	Point 9	185.515	-78.6991	293.794	no cnx
2020_07_26_exp3_TH	2	interneuron	2	160	314.974	Point 8	352.682	103.909	331.444	no cnx
2020_07_26_exp3_TH	2	interneuron	2	160	314.974	Point 11	291.053	106.052	293.794	inhibitory
2020_07_26_exp3_TH	2	interneuron	2	160	314.974	Point 10	264.058	15.295	293.794	no cnx
2020_07_26_exp3_TH	2	interneuron	2	160	314.974	Point 13	338.788	-58.2442	313.474	no cnx
2020_07_26_exp3_TH	2	interneuron	2	160	314.974	Point 12	237.414	34.0087	281.374	no cnx
2020_07_26_exp3_TH	2	interneuron	2	160	314.974	Point 15	352.312	-45.2125	313.474	inhibitory
2020_07_26_exp3_TH	2	interneuron	2	160	314.974	Point 14	352.04	73.6468	313.474	no cnx
2020_07_26_exp3_TH	2	interneuron	2	160	314.974	Point 17	221.833	153.495	321.994	no cnx
2020_07_26_exp3_TH	2	interneuron	2	160	314.974	Point 16	388.883	122.84	313.474	inhibitory
2020_07_26_exp3_TH	2	interneuron	2	160	314.974	Point 19	396.796	208.498	308.614	no cnx
2020_07_26_exp3_TH	2	interneuron	2	160	314.974	Point 18	433.848	259.184	321.994	no cnx
2020_07_26_exp3_TH	2	interneuron	2	160	314.974	Point 20	317.446	197.286	308.614	no cnx
2020_07_26_exp3_TH	2	interneuron	2	160	314.974	Point 22	372.945	270.221	308.614	no cnx
2020_07_24_exp3_TH	1	interneuron	2	171	366.714	Point 5	341.122	143.164	354.284	no cnx
2020_07_24_exp3_TH	1	interneuron	2	171	366.714	Point 4	196.826	34.675	354.284	direct
2020_07_24_exp3_TH	1	interneuron	2	171	366.714	Point 6	404.771	84.1495	354.284	inhibitory
2020_07_24_exp3_TH	1	interneuron	2	171	366.714	Point 1	267.62	-10.7857	354.624	no cnx
2020_07_24_exp3_TH	1	interneuron	2	171	366.714	Point 3	187.896	75.5537	369.944	no cnx
2020_07_24_exp3_TH	0	interneuron	2	260	366.394	Point 11	597.922	258.299	334.744	no cnx
2020_07_24_exp3_TH	0	interneuron	2	260	366.394	Point 10	594.292	278.93	343.454	no cnx
2020_07_24_exp3_TH	0	interneuron	2	260	366.394	Point 13	488.18	95.7895	325.854	no cnx
2020_07_24_exp3_TH	0	interneuron	2	260	366.394	Point 12	606.029	245.158	334.744	no cnx
2020_07_24_exp3_TH	0	interneuron	2	260	366.394	Point 15	433.44	145.7	318.024	no cnx
2020_07_24_exp3_TH	0	interneuron	2	260	366.394	Point 14	674.132	280.068	325.854	no cnx
2020_07_24_exp3_TH	0	interneuron	2	260	366.394	Point 17	536.023	265.619	318.024	no cnx
2020_07_24_exp3_TH	0	interneuron	2	260	366.394	Point 16	502.849	178.196	318.024	no cnx
2020_07_24_exp3_TH	0	interneuron	2	260	366.394	Point 19	515.26	304.382	296.054	no cnx
2020_07_24_exp3_TH	0	interneuron	2	260	366.394	Point 18	687.52	260.515	309.334	no cnx
2020_07_24_exp3_TH	0	interneuron	2	260	366.394	Point 5	343.147	142.677	354.284	no cnx
2020_07_24_exp3_TH	0	interneuron	2	260	366.394	Point 4	198.851	34.1879	354.284	no cnx
2020_07_24_exp3_TH	0	interneuron	2	260	366.394	Point 7	418.445	111.016	343.454	no cnx
2020_07_24_exp3_TH	0	interneuron	2	260	366.394	Point 6	406.795	83.6624	354.284	no cnx
2020_07_24_exp3_TH	0	interneuron	2	260	366.394	Point 3	189.921	75.0665	369.944	direct
2020_07_24_exp3_TH	0	interneuron	2	260	366.394	Point 9	641	276.636	343.454	no cnx
2020_07_24_exp3_TH	0	interneuron	2	260	366.394	Point 8	456.956	91.0481	343.454	no cnx
2020_07_24_exp3_TH	0	interneuron	2	260	366.394	Point 28	403.716	205.123	363.274	no cnx
2020_07_24_exp3_TH	0	interneuron	2	260	366.394	Point 20	548.975	233.362	296.054	no cnx
2020_07_24_exp3_TH	0	interneuron	2	260	366.394	Point 21	678.107	159.791	296.054	no cnx
2020_07_24_exp3_TH	0	interneuron	2	260	366.394	Point 22	512.076	137.802	296.054	no cnx
2020_07_24_exp3_TH	0	interneuron	2	260	366.394	Point 23	498.178	243.576	296.054	inhibitory
2020_07_24_exp3_TH	0	interneuron	2	260	366.394	Point 24	376.939	163.313	329.914	no cnx
2020_07_24_exp3_TH	0	interneuron	2	260	366.394	Point 25	289.153	46.4188	329.914	inhibitory
2020_07_24_exp3_TH	0	interneuron	2	260	366.394	Point 26	213.222	-30.0465	329.374	no cnx
2020_07_24_exp3_TH	0	interneuron	2	260	366.394	Point 27	369.169	204.686	363.274	no cnx
2020_07_24_exp2_TH	3	interneuron	2	212	259.264	Point 11	595.995	-127.262	201.774	no cnx
2020_07_24_exp2_TH	3	interneuron	2	212	259.264	Point 10	509.139	-265.712	206.234	no cnx
2020_07_24_exp2_TH	3	interneuron	2	212	259.264	Point 13	717.314	-60.7805	201.774	no cnx
2020_07_24_exp2_TH	3	interneuron	2	212	259.264	Point 12	800.584	-76.1791	201.774	no cnx
2020_07_24_exp2_TH	3	interneuron	2	212	259.264	Point 15	758.884	-262.965	205.884	no cnx
2020_07_24_exp2_TH	3	interneuron	2	212	259.264	Point 14	732.561	-94.1794	192.634	no cnx
2020_07_24_exp2_TH	3	interneuron	2	212	259.264	Point 17	798.494	-4.00698	205.884	no cnx
2020_07_24_exp2_TH	3	interneuron	2	212	259.264	Point 16	800.791	-258.511	205.884	no cnx
2020_07_24_exp2_TH	3	interneuron	2	212	259.264	Point 19	641.325	-112.62	225.414	no cnx
2020_07_24_exp2_TH	3	interneuron	2	212	259.264	Point 18	586.278	-177.694	225.414	no cnx
2020_07_24_exp2_TH	3	interneuron	2	212	259.264	Point 31	618.716	-391.724	276.864	no cnx
2020_07_24_exp2_TH	3	interneuron	2	212	259.264	Point 30	530.86	-370.102	276.864	no cnx
2020_07_24_exp2_TH	3	interneuron	2	212	259.264	Point 35	593.998	-224.063	266.814	no cnx
2020_07_24_exp2_TH	3	interneuron	2	212	259.264	Point 34	585.085	-268.881	266.814	no cnx
2020_07_24_exp2_TH	3	interneuron	2	212	259.264	Point 5	611.174	-241.725	243.624	no cnx
2020_07_24_exp2_TH	3	interneuron	2	212	259.264	Point 4	544.533	-195.215	224.414	no cnx
2020_07_24_exp2_TH	3	interneuron	2	212	259.264	Point 7	528.838	-61.9907	243.624	no cnx
2020_07_24_exp2_TH	3	interneuron	2	212	259.264	Point 6	490.601	-14.9747	243.624	no cnx
2020_07_24_exp2_TH	3	interneuron	2	212	259.264	Point 1	430.365	-139.153	224.414	no cnx
2020_07_24_exp2_TH	3	interneuron	2	212	259.264	Point 3	540.814	-206.101	224.414	no cnx
2020_07_24_exp2_TH	3	interneuron	2	212	259.264	Point 2	495.332	-204.467	224.414	no cnx
2020_07_24_exp2_TH	3	interneuron	2	212	259.264	Point 9	494.139	-53.5366	206.234	no cnx
2020_07_24_exp2_TH	3	interneuron	2	212	259.264	Point 8	592.549	-42.5293	243.624	no cnx
2020_07_24_exp2_TH	3	interneuron	2	212	259.264	Point 32	560.458	-352.892	276.874	no cnx
2020_07_24_exp2_TH	3	interneuron	2	212	259.264	Point 28	593.552	-304.742	286.734	no cnx
2020_07_24_exp2_TH	3	interneuron	2	212	259.264	Point 29	501.587	-299.798	276.864	no cnx
2020_07_24_exp2_TH	3	interneuron	2	212	259.264	Point 20	711.14	-15.337	225.414	no cnx
2020_07_24_exp2_TH	3	interneuron	2	212	259.264	Point 21	601.524	16.8328	225.414	no cnx
2020_07_24_exp2_TH	3	interneuron	2	212	259.264	Point 22	815.176	-199.731	238.634	no cnx
2020_07_24_exp2_TH	3	interneuron	2	212	259.264	Point 23	635.329	6.67434	238.634	no cnx
2020_07_24_exp2_TH	3	interneuron	2	212	259.264	Point 24	475.095	-444.974	286.734	no cnx
2020_07_24_exp2_TH	3	interneuron	2	212	259.264	Point 25	617.952	-258.373	286.734	no cnx
2020_07_24_exp2_TH	3	interneuron	2	212	259.264	Point 26	548.185	-300.667	286.734	no cnx
2020_07_24_exp2_TH	3	interneuron	2	212	259.264	Point 27	599.225	-252.233	286.734	no cnx
2020_07_24_exp2_TH	3	interneuron	2	212	259.264	Point 33	436.567	-441.239	266.814	no cnx
2020_07_23_exp1_TH	2	interneuron	2	133	166	Point 11	412.893	-25.5737	185.294	no cnx
2020_07_23_exp1_TH	2	interneuron	2	133	166	Point 10	312.483	-40.2991	185.294	inhibitory
2020_07_23_exp1_TH	2	interneuron	2	133	166	Point 13	321.226	110.953	205.004	no cnx
2020_07_23_exp1_TH	2	interneuron	2	133	166	Point 12	396.674	38.6251	185.294	no cnx
2020_07_23_exp1_TH	2	interneuron	2	133	166	Point 15	356.164	103.046	205.004	no cnx
2020_07_23_exp1_TH	2	interneuron	2	133	166	Point 14	461.406	85.8853	205.004	inhibitory
2020_07_23_exp1_TH	2	interneuron	2	133	166	Point 17	411.757	247.243	205.004	no cnx
2020_07_23_exp1_TH	2	interneuron	2	133	166	Point 16	421.075	188.59	205.004	no cnx
2020_07_23_exp1_TH	2	interneuron	2	133	166	Point 19	356.891	16.8351	212.014	inhibitory
2020_07_23_exp1_TH	2	interneuron	2	133	166	Point 18	356.367	168.554	212.014	no cnx
2020_07_23_exp1_TH	2	interneuron	2	133	166	Point 31	561.83	74.411	242.074	no cnx
2020_07_23_exp1_TH	2	interneuron	2	133	166	Point 30	511.192	43.4005	242.074	no cnx
2020_07_23_exp1_TH	2	interneuron	2	133	166	Point 5	384.577	128.924	123.024	no cnx
2020_07_23_exp1_TH	2	interneuron	2	133	166	Point 4	345.786	58.7791	123.024	no cnx
2020_07_23_exp1_TH	2	interneuron	2	133	166	Point 7	462.357	-52.2127	168.164	no cnx
2020_07_23_exp1_TH	2	interneuron	2	133	166	Point 6	515.455	26.0481	168.164	no cnx
2020_07_23_exp1_TH	2	interneuron	2	133	166	Point 3	436.187	-86.4841	123.024	no cnx
2020_07_23_exp1_TH	2	interneuron	2	133	166	Point 2	266.552	-53.3443	119.334	no cnx
2020_07_23_exp1_TH	2	interneuron	2	133	166	Point 9	255.907	3.24579	185.294	no cnx
2020_07_23_exp1_TH	2	interneuron	2	133	166	Point 8	329.847	-12.8331	168.164	no cnx
2020_07_23_exp1_TH	2	interneuron	2	133	166	Point 28	494.68	-121.473	242.074	no cnx
2020_07_23_exp1_TH	2	interneuron	2	133	166	Point 29	556.935	-37.736	242.074	no cnx
2020_07_23_exp1_TH	2	interneuron	2	133	166	Point 20	324.37	207.887	212.014	no cnx
2020_07_23_exp1_TH	2	interneuron	2	133	166	Point 21	289.248	218.946	166.834	no cnx
2020_07_23_exp1_TH	2	interneuron	2	133	166	Point 22	461.756	-139.727	249.134	no cnx
2020_07_23_exp1_TH	2	interneuron	2	133	166	Point 23	627.483	-83.7375	249.134	no cnx
2020_07_23_exp1_TH	2	interneuron	2	133	166	Point 24	687.122	0.544908	249.134	no cnx
2020_07_23_exp1_TH	2	interneuron	2	133	166	Point 25	501.303	-25.1372	249.134	no cnx
2020_07_23_exp1_TH	2	interneuron	2	133	166	Point 26	578.931	95.8862	249.134	no cnx
2020_07_23_exp1_TH	2	interneuron	2	133	166	Point 27	486.86	-92.8274	249.134	no cnx
2020_07_19_exp1_TH	1	interneuron	2	177	256.374	Point 11	264.31	-8.39372	289.144	inhibitory
2020_07_19_exp1_TH	1	interneuron	2	177	256.374	Point 10	281.642	-38.0411	289.144	no cnx
2020_07_19_exp1_TH	1	interneuron	2	177	256.374	Point 13	479.605	81.2805	284.344	no cnx
2020_07_19_exp1_TH	1	interneuron	2	177	256.374	Point 12	291.692	115.918	289.144	no cnx
2020_07_19_exp1_TH	1	interneuron	2	177	256.374	Point 15	442.271	10.589	284.344	no cnx
2020_07_19_exp1_TH	1	interneuron	2	177	256.374	Point 14	437.551	33.4997	284.344	no cnx
2020_07_19_exp1_TH	1	interneuron	2	177	256.374	Point 17	404.371	52.1409	270.914	no cnx
2020_07_19_exp1_TH	1	interneuron	2	177	256.374	Point 16	354.002	-90.6266	270.914	no cnx
2020_07_19_exp1_TH	1	interneuron	2	177	256.374	Point 19	444.9	-22.7484	256.214	no cnx
2020_07_19_exp1_TH	1	interneuron	2	177	256.374	Point 18	361.7	-30.917	256.214	no cnx
2020_07_19_exp1_TH	1	interneuron	2	177	256.374	Point 5	163.854	-79.882	234.294	direct
2020_07_19_exp1_TH	1	interneuron	2	177	256.374	Point 4	238.083	-4.8546	224.064	direct
2020_07_19_exp1_TH	1	interneuron	2	177	256.374	Point 7	342.385	8.50432	298.374	inhibitory
2020_07_19_exp1_TH	1	interneuron	2	177	256.374	Point 6	280.205	4.21414	298.374	no cnx
2020_07_19_exp1_TH	1	interneuron	2	177	256.374	Point 3	312.974	67.5356	267.834	inhibitory
2020_07_19_exp1_TH	1	interneuron	2	177	256.374	Point 2	312.932	-33.1687	267.834	no cnx
2020_07_19_exp1_TH	1	interneuron	2	177	256.374	Point 9	413.524	-20.3456	298.374	no cnx
2020_07_19_exp1_TH	1	interneuron	2	177	256.374	Point 8	280.869	37.3355	298.374	no cnx

## Sheet: Figure6E_Pcnx_horiz_L23FSI
L23Pvalb_L23fsi_Pcnx_horiz_bins	0	100	200	300
L23Pvalb_L23fsi_Pcnx_horiz_midX	50	150	250
L23Pvalb_L23fsi_Pcnx_horiz_probed_hist	35	19	12
L23Pvalb_L23fsi_Pcnx_horiz_inh_hist	12	7	3
L23Pvalb_L23fsi_Pcnx_horiz_inh_frac	0.342857	0.368421	0.25
L23Pvalb_L23fsi_Pcnx_horiz_inh_ci_low	0.202955	0.182404	0.0759423
L23Pvalb_L23fsi_Pcnx_horiz_inh_ci_high	0.507568	0.591265	0.529191
L4Pvalb_L23fsi_Pcnx_horiz_bins	0	100	200	300
L4Pvalb_L23fsi_Pcnx_horiz_midX	50	150	250
L4Pvalb_L23fsi_Pcnx_horiz_probed_hist	29	16	12
L4Pvalb_L23fsi_Pcnx_horiz_inh_hist	7	2	1
L4Pvalb_L23fsi_Pcnx_horiz_inh_frac	0.241379	0.125	0.0833333
L4Pvalb_L23fsi_Pcnx_horiz_inh_ci_low	0.115009	0.0269128	0.00914433
L4Pvalb_L23fsi_Pcnx_horiz_inh_ci_high	0.416479	0.344176	0.328496
L5Pvalb_L23fsi_Pcnx_horiz_bins	0	100	200	300
L5Pvalb_L23fsi_Pcnx_horiz_midX	50	150	250
L5Pvalb_L23fsi_Pcnx_horiz_probed_hist	20	12	24
L5Pvalb_L23fsi_Pcnx_horiz_inh_hist	0	1	1
L5Pvalb_L23fsi_Pcnx_horiz_inh_frac	0	0.0833333	0.0416667
L5Pvalb_L23fsi_Pcnx_horiz_inh_ci_low	2.42e-05	0.00914433	0.00453319
L5Pvalb_L23fsi_Pcnx_horiz_inh_ci_high	0.116639	0.328496	0.178695
L23Sst_L23fsi_Pcnx_horiz_bins	0	100	200	300
L23Sst_L23fsi_Pcnx_horiz_midX	50	150	250
L23Sst_L23fsi_Pcnx_horiz_probed_hist	19	18	7
L23Sst_L23fsi_Pcnx_horiz_inh_hist	4	2	0
L23Sst_L23fsi_Pcnx_horiz_inh_frac	0.210526	0.111111	0
L23Sst_L23fsi_Pcnx_horiz_inh_ci_low	0.0755319	0.0238245	6.76865e-05
L23Sst_L23fsi_Pcnx_horiz_inh_ci_high	0.426206	0.311151	0.292436
L4Sst_L23fsi_Pcnx_horiz_bins	0	100	200	300
L4Sst_L23fsi_Pcnx_horiz_midX	50	150	250
L4Sst_L23fsi_Pcnx_horiz_probed_hist	28	24	16
L4Sst_L23fsi_Pcnx_horiz_inh_hist	7	2	0
L4Sst_L23fsi_Pcnx_horiz_inh_frac	0.25	0.0833333	0
L4Sst_L23fsi_Pcnx_horiz_inh_ci_low	0.119412	0.0177247	3.02135e-05
L4Sst_L23fsi_Pcnx_horiz_inh_ci_high	0.429287	0.241403	0.143184
L5Sst_L23fsi_Pcnx_horiz_bins	0	100	200	300
L5Sst_L23fsi_Pcnx_horiz_midX	50	150	250
L5Sst_L23fsi_Pcnx_horiz_probed_hist	21	13	3
L5Sst_L23fsi_Pcnx_horiz_inh_hist	2	0	0
L5Sst_L23fsi_Pcnx_horiz_inh_frac	0.0952381	0	0
L5Sst_L23fsi_Pcnx_horiz_inh_ci_low	0.0203266	3.70519e-05	0.000150636
L5Sst_L23fsi_Pcnx_horiz_inh_ci_high	0.271911	0.172619	0.535583
