# Supplementary material for: Synaptic connectivity to L2/3 of primary visual cortex measured by two-photon optogenetic stimulation
Source: eLife. 2022 Jan 21;11:e71103. doi: 10.7554/eLife.71103 (PMC8824465; doi:10.7554/eLife.71103)
Supplement: Figure 7—source data 1. [file elife-71103-fig7-data1.xlsx]

## Sheet: Fig7A_exc_amplitudes
Penk to PC	0.260336	0.468159	0.215734	0.280771	0.156442	0.0962846	0.292989	0.124972	0.171108	0.0934493	0.177704	0.13653	0.0544341	0.0969945	0.0639522	0.108946
Rorb to PC	0.101221	0.256783	0.60053	0.213301	0.774848	0.319597	0.632884	0.155393	0.521291	0.257291	0.512747	0.450692	1.56907	0.483663	0.1553	0.0576065	0.385124	0.208493	0.0994865	0.672381	0.14924	0.782069	0.655237	0.27332	0.140737	0.598231	0.13819	0.218321	0.105903	0.297746	0.107661	0.23973	0.300014	0.136576	0.23798	0.277486	0.992808	0.0929015	0.637837	0.0519204	1.09997	0.237103	0.390677	0.119558	0.18031	0.163624	0.395116	0.085665	0.430718
Tlx3 to PC	0.286399	0.235824	0.866704	0.884682	0.841843	0.236699	0.0882412	0.139844	0.158077	0.160195	2.14829	0.0765939	0.329297	0.996763	0.306044	0.317416	0.564563	0.718997	0.323952	0.0467628	0.057846	0.209447	0.275913	0.334657	0.523521	0.14188	1.24679	0.0592239	0.0589893	1.25374	0.235981	0.100224	0.592872	0.241068	0.108904	0.371522	0.0688393	0.196302	0.450964	0.719237	1.56279	0.143951	0.416851	0.476819	1.54194	0.138866	0.510718	0.178409	0.334996
Penk to FSI	2.68899	0.0396443	3.89725	1.14586	0.323253	1.39186	0.4831	0.666521	0.0825916	1.23545	0.142098	0.806555	0.156263	0.133703	0.13635	0.148229	1.33284	2.34619	1.11425	0.252342	1.10493	0.891767	0.492277	0.19283	3.29159	1.82777	0.816928	0.931812
Rorb to FSI	0.244709	0.225508	1.72668	0.204524	0.364662	0.156006	1.13616	0.305312	0.875349	0.204569	0.350834	0.411529	0.447991	0.396807	0.620399	0.60277	0.338134	0.339226	0.714188	0.632008	0.731096	0.040055	1.10343	0.959597
Tlx3 to FSI	0.101678	0.696512	0.467156	0.462598	0.158908	0.158877	0.742536	0.340466	0.439667
[truncated: 196 more columns]

## Sheet: Fig7A_inh_amplitudes
Pvalb to PC	0.55233	0.332154	1.20968	0.102954	1.97154	0.0665569	0.0424876	0.116352	0.0398738	0.266422	0.366174	0.624981	0.0882274	0.537864	0.0456735	0.0670541	0.0374086	0.877874	0.242469	0.2734	0.351291	1.0419	0.283069	0.333506	0.340168	0.105926	0.103582	0.165222	0.628005	0.331114	0.031189	0.10996	0.359971	0.206741	0.46317	0.273357	0.516207	0.115814	0.118495	0.138535	0.273958	0.224746	0.102663	0.344324	0.341764	0.276572	0.885648	0.431668	1.52768
Sst to PC	0.081368	0.0739399	0.113129	0.121017	0.0758739	0.0943548	0.0814344	0.127617	0.0501834	0.0881513	0.0679203	0.0507912	0.0953075	0.0216678	0.262124	0.0676762	0.394798	0.452979	0.126566	0.0960222	0.011925	0.0563484	0.124428	0.0675382	0.129191	0.10738	0.21424	0.103433	0.0557893	0.0753891	0.0628581	0.0786407	0.463503	0.0708362	0.111856	0.116062	0.23234	0.0331881	0.210032	0.146388	0.305891	0.285536	0.127266	0.0864137	0.202944	0.0899096	0.0199703	0.136083	0.245438
Pvalb to Pvalb	0.205382	0.155493	0.299355	0.111113	0.374693	0.407685	1.00342	0.185531	0.0674529	0.475012	0.247372	0.086572	0.0762011	0.300392	0.0955223	0.0437352	0.274496	0.292041	0.111206	0.29825	0.120581	0.141524	0.154649	0.272553	0.130385	0.0782444	0.0426454	0.136141
Sst to FSI	0.374273	0.124722	0.069071	0.162478	1.65978	0.215949	0.256114	0.228082	0.177475	0.10155	0.129868	0.115503	0.148234	0.361168	0.141441	0.275805	1.33083	0.211486
[truncated: 113 more columns]

## Sheet: Fig7B_exc_L23PC_props
exp_id	presynapticCre	presynapticEffector	headstage	post_class	post_layer	postPia	post_z	MP_ID	prePia	x_ap	pre_z	cnx	peakOfAvg	CV	rise2080
2020_11_12_exp1_TH	Penk	ChrimsonR_kv_eyfp_AAV	3	pyramidal	2	139	386.944	Point 13	197.309	23.9609	359.974	excitatory	0.260336	1.06632	2.68379
2020_10_23_exp2_TH	Tlx3	ChrimsonR_kv_eyfp_AAV	0	pyramidal	2	126	586.884	Point 12	433.861	96.2539	565.484	excitatory	0.286399	0.457243	1.95416
2020_10_23_exp2_TH	Tlx3	ChrimsonR_kv_eyfp_AAV	0	pyramidal	2	126	586.884	Point 18	434.711	86.6589	558.634	excitatory	0.235824	0.665411	2.39098
2020_08_21_exp1_TH	Penk	ChrimsonR_kv_eyfp_AAV	2	pyramidal	2	97	62.664	Point 15	97.9506	67.7436	45.364	excitatory	0.468159	1.11978	2.07473
2020_08_21_exp1_TH	Penk	ChrimsonR_kv_eyfp_AAV	1	pyramidal	2	95	56.3338	Point 28	115.688	-43.4085	23.344	excitatory	0.215734	1.14429	2.85998
2020_08_21_exp1_TH	Penk	ChrimsonR_kv_eyfp_AAV	1	pyramidal	2	95	56.3338	Point 38	111.737	-26.6549	15.704	excitatory	0.280771	0.777805	1.44489
2020_08_14_exp2_TH	Rorb	Ai167	0	pyramidal	2	236	-170.886	Point 19	496.02	-89.4311	-161.636	excitatory	0.101221	1.47121	1.35969
2020_08_14_exp2_TH	Rorb	Ai167	0	pyramidal	2	236	-170.886	Point 3	420.448	99.1407	-145.866	excitatory	0.256783	0.737421	1.55535
2020_08_06_exp1_TH	Penk	ChrimsonR_kv_eyfp_AAV	0	pyramidal	2	206	228.774	Point 20	186.079	53.8257	211.464	excitatory	0.156442	0.90554	1.67383
2020_07_31_exp2_TH	Penk	ChrimsonR_kv_eyfp_AAV	3	pyramidal	2	193	301.934	Point 58	224.19	48.6891	315.634	excitatory	0.0962846	0.657253	3.2075
2020_07_31_exp2_TH	Penk	ChrimsonR_kv_eyfp_AAV	0	pyramidal	2	141	285.264	Point 13	125.017	62.1259	265.514	excitatory	0.292989	0.498577	1.1592
2020_07_31_exp2_TH	Penk	ChrimsonR_kv_eyfp_AAV	0	pyramidal	2	141	285.264	Point 24	141.955	255.775	252.764	excitatory	0.124972	0.706593	1.87646
2020_07_30_exp2_TH	Penk	ChrimsonR_kv_eyfp_AAV	3	pyramidal	2	158	118.604	Point 20	112.05	98.3551	102.774	excitatory	0.171108	1.02007	1.40831
2020_07_09_exp3_TH	Tlx3	ChrimsonR_kv_eyfp_AAV	1	pyramidal	2	198	257.034	Point 36	439.277	219.13	202.234	excitatory	0.866704	0.334162	1.41947
2020_07_09_exp3_TH	Tlx3	ChrimsonR_kv_eyfp_AAV	1	pyramidal	2	198	257.034	Point 33	435.981	229.006	200.614	excitatory	0.884682	0.307435	1.21374
2020_07_09_exp3_TH	Tlx3	ChrimsonR_kv_eyfp_AAV	1	pyramidal	2	198	257.034	Point 38	444.841	226.605	190.544	excitatory	0.841843	0.198418	1.35282
2020_07_09_exp2_TH	Tlx3	ChrimsonR_kv_eyfp_AAV	1	pyramidal	2	164	202	Point 8	406.045	134.824	190.724	excitatory	0.236699	0.652114	1.87652
2020_07_09_exp2_TH	Tlx3	ChrimsonR_kv_eyfp_AAV	1	pyramidal	2	164	202	Point 17	399.533	125.109	192.594	excitatory	0.0882412	0.754156	1.42165
2020_07_09_exp2_TH	Tlx3	ChrimsonR_kv_eyfp_AAV	0	pyramidal	2	215	202	Point 18	415.588	219.584	205.284	excitatory	0.139844	0.507592	1.67557
2020_07_09_exp2_TH	Tlx3	ChrimsonR_kv_eyfp_AAV	0	pyramidal	2	215	202	Point 20	403.442	223.439	205.284	excitatory	0.158077	0.454074	1.61528
2020_07_09_exp1_TH	Tlx3	ChrimsonR_kv_eyfp_AAV	1	pyramidal	2	210	177.734	Point 30	340.89	42.3358	152.119	excitatory	0.160195	1.61966	2.12725
2020_07_09_exp1_TH	Tlx3	ChrimsonR_kv_eyfp_AAV	1	pyramidal	2	210	177.734	Point 9	339.342	80.5764	165.604	excitatory	2.14829	0.638704	4.41495
2020_07_03_exp3_TH	Rorb	ChrimsonR_kv_eyfp_AAV	1	pyramidal	2	220	242.974	Point 18	304.916	0.528655	268.554	excitatory	0.60053	0.414945	3.01991
2020_07_03_exp3_TH	Rorb	ChrimsonR_kv_eyfp_AAV	1	pyramidal	2	220	242.974	Point 21	315.635	-2.26818	280.054	excitatory	0.213301	0.774056	2.93063
2020_06_11_exp2_TH	Rorb	Ai167	0	pyramidal	2	193	216.964	Point 6	486.561	79.354	216.434	excitatory	0.774848	0.350013	2.11521
2020_06_11_exp2_TH	Rorb	Ai167	0	pyramidal	2	193	216.964	Point 8	525.952	-5.71022	205.404	excitatory	0.319597	0.778848	2.8408
2020_06_05_exp3_TH	Rorb	Ai167	2	pyramidal	2	224	265	Point 4	341.446	13.8774	289.164	excitatory	0.632884	0.31823	2.05354
2020_06_05_exp3_TH	Rorb	Ai167	2	pyramidal	2	224	265	Point 10	450.416	-59.9898	285.994	excitatory	0.155393	0.764169	2.21811
2020_06_05_exp2_TH	Rorb	Ai167	1	pyramidal	2	240	141.284	Point 21	408.532	67.8952	78.504	excitatory	0.521291	0.506568	1.38447
2020_06_05_exp2_TH	Rorb	Ai167	0	pyramidal	2	182	150.494	Point 9	422.469	-6.59769	142.534	excitatory	0.257291	0.939409	3.81601
2020_06_05_exp1_TH	Rorb	Ai167	2	pyramidal	2	204	185.224	Point 9	595.441	-315.057	138.244	excitatory	0.512747	0.304673	1.90902
2020_06_04_exp3_TH	Rorb	Ai167	2	pyramidal	2	249	120.724	Point 4	410.72	10.4039	111.974	excitatory	0.450692	0.332648	4.40066
2020_06_04_exp3_TH	Rorb	Ai167	2	pyramidal	2	249	120.724	Point 1	454.868	-79.7498	129.594	excitatory	1.56907	0.206184	1.74439
2020_06_04_exp2_TH	Rorb	Ai167	3	pyramidal	2	218	316.514	Point 14	589.167	103.521	114.584	excitatory	0.483663	0.627079	2.15224
2020_05_29_exp2_TH	Tlx3	ChrimsonR_kv_eyfp_AAV	3	pyramidal	2	241	79.4241	Point 9	492.009	139.888	118.244	excitatory	0.0765939	1.15088	3.44186
2020_05_29_exp2_TH	Tlx3	ChrimsonR_kv_eyfp_AAV	3	pyramidal	2	241	79.4241	Point 21	468.198	55.5513	98.994	excitatory	0.329297	0.371011	1.83176
2020_05_29_exp2_TH	Tlx3	ChrimsonR_kv_eyfp_AAV	2	pyramidal	2	285	92.254	Point 16	445.834	-19.1751	98.994	excitatory	0.996763	0.237094	3.46702
2020_05_29_exp1_TH	Tlx3	ChrimsonR_kv_eyfp_AAV	3	pyramidal	2	184	128.954	Point 12	520.943	-31.5726	193.944	excitatory	0.306044	0.303573	1.94735
2020_05_29_exp1_TH	Tlx3	ChrimsonR_kv_eyfp_AAV	3	pyramidal	2	184	128.954	Point 19	376.528	-69.0791	193.944	excitatory	0.317416	0.630513	1.37489
2020_05_29_exp1_TH	Tlx3	ChrimsonR_kv_eyfp_AAV	3	pyramidal	2	184	128.954	Point 7	511.043	105.511	162.134	excitatory	0.564563	0.38188	1.20538
2020_05_29_exp1_TH	Tlx3	ChrimsonR_kv_eyfp_AAV	3	pyramidal	2	184	128.954	Point 6	527.679	105.392	175.114	excitatory	0.718997	0.325482	1.30914
2020_05_29_exp1_TH	Tlx3	ChrimsonR_kv_eyfp_AAV	3	pyramidal	2	184	128.954	Point 21	541.837	-43.1822	195.144	excitatory	0.323952	0.510264	2.09614
2020_05_29_exp1_TH	Tlx3	ChrimsonR_kv_eyfp_AAV	3	pyramidal	2	184	128.954	Point 23	543.114	21.9934	191.064	excitatory	0.0467628	1.03172	1.51421
2020_05_29_exp1_TH	Tlx3	ChrimsonR_kv_eyfp_AAV	3	pyramidal	2	184	128.954	Point 24	560.233	-18.6287	188.924	excitatory	0.057846	0.839619	2.18973
2020_05_29_exp1_TH	Tlx3	ChrimsonR_kv_eyfp_AAV	3	pyramidal	2	184	128.954	Point 27	555.928	-56.1609	200.944	excitatory	0.209447	0.500047	1.8652
2020_05_28_exp1_TH	Rorb	ChrimsonR_kv_eyfp_AAV	1	pyramidal	2	154	118.784	Point 13	383.959	-20.2351	161.474	excitatory	0.1553	0.606855	1.93107
2020_05_28_exp1_TH	Rorb	ChrimsonR_kv_eyfp_AAV	1	pyramidal	2	154	118.784	Point 12	369.53	17.5138	155.624	excitatory	0.0576065	1.59559	1.52822
2020_05_28_exp1_TH	Rorb	ChrimsonR_kv_eyfp_AAV	1	pyramidal	2	154	118.784	Point 35	458.44	-6.31722	150.864	excitatory	0.385124	0.930191	2.02743
2020_05_28_exp1_TH	Rorb	ChrimsonR_kv_eyfp_AAV	1	pyramidal	2	154	118.784	Point 8	381.162	19.0066	163.244	excitatory	0.208493	0.978221	2.62847
2020_05_28_exp1_TH	Rorb	ChrimsonR_kv_eyfp_AAV	1	pyramidal	2	154	118.784	Point 32	446.486	7.38353	160.534	excitatory	0.0994865	0.777362	1.89001
2020_05_28_exp1_TH	Rorb	ChrimsonR_kv_eyfp_AAV	1	pyramidal	2	154	118.784	Point 41	445.167	-18.2365	130.534	excitatory	0.672381	0.573851	1.57072
2020_05_27_exp2_TH	Penk	ChrimsonR_kv_eyfp_AAV	2	pyramidal	2	161	13.4309	Point 13	152.874	-67.6342	-15.429	excitatory	0.0934493	0.58465	1.34135
2020_05_27_exp2_TH	Penk	ChrimsonR_kv_eyfp_AAV	1	pyramidal	2	166	13.0408	Point 18	119.067	3.06889	-22.569	excitatory	0.177704	0.660972	2.54923
2020_05_27_exp2_TH	Penk	ChrimsonR_kv_eyfp_AAV	1	pyramidal	2	166	13.0408	Point 8	181.452	-29.3473	-15.429	excitatory	0.13653	0.71695	1.91529
2020_05_27_exp1_TH	Penk	ChrimsonR_kv_eyfp_AAV	1	pyramidal	2	164	67.371	Point 5	178.751	-146.15	73.551	excitatory	0.0544341	0.554058	1.53583
2020_05_26_exp2_TH	Penk	ChrimsonR_kv_eyfp_AAV	1	pyramidal	2	146	15.4418	Point 19	153.212	95.2048	-0.129	excitatory	0.0969945	0.597201	1.94504
2020_05_26_exp2_TH	Penk	ChrimsonR_kv_eyfp_AAV	1	pyramidal	2	146	15.4418	Point 22	126.723	190.122	-0.129	excitatory	0.0639522	1.26599	1.41171
2020_05_26_exp2_TH	Penk	ChrimsonR_kv_eyfp_AAV	1	pyramidal	2	146	15.4418	Point 24	184.265	82.0594	-3.349	excitatory	0.108946	0.488414	1.46245
2020_05_22_exp2_TH	Rorb	Ai167	3	pyramidal	2	227	39.5612	Point 11	401.401	148.678	20.181	excitatory	0.14924	1.23178	2.42893
2020_05_22_exp2_TH	Rorb	Ai167	3	pyramidal	2	227	39.5612	Point 15	449.123	80.3975	7.161	excitatory	0.782069	0.293609	1.3632
2020_05_22_exp2_TH	Rorb	Ai167	3	pyramidal	2	227	39.5612	Point 17	342.475	-25.491	7.161	excitatory	0.655237	0.267226	0.889503
2020_05_22_exp2_TH	Rorb	Ai167	2	pyramidal	2	253	33.031	Point 16	446.281	-1.05049	7.161	excitatory	0.27332	0.528352	1.39397
2019_08_26_exp2_TH	Tlx3	ChrimsonR_kv_eyfp_AAV	3	pyramidal	2	216	101.186	Point 13	545.715	295.567	86.686	excitatory	0.275913	0.55651	2.27119
2019_08_26_exp2_TH	Tlx3	ChrimsonR_kv_eyfp_AAV	3	pyramidal	2	216	101.186	Point 2	523.645	201.983	90.856	excitatory	0.334657	0.580538	1.84195
2019_08_26_exp1_TH	Tlx3	ChrimsonR_kv_eyfp_AAV	1	pyramidal	2	155	230.716	Point 12	534.629	241.02	215.806	excitatory	0.523521	0.628045	1.50362
2019_08_26_exp1_TH	Tlx3	ChrimsonR_kv_eyfp_AAV	1	pyramidal	2	155	230.716	Point 34	540.685	276.217	219.536	excitatory	0.14188	0.494815	1.68939
2019_08_26_exp1_TH	Tlx3	ChrimsonR_kv_eyfp_AAV	1	pyramidal	2	155	230.716	Point 20	531.53	304.869	207.556	excitatory	1.24679	0.180075	3.49943
2019_08_26_exp1_TH	Tlx3	ChrimsonR_kv_eyfp_AAV	1	pyramidal	2	155	230.716	Point 22	513.103	192.87	207.556	excitatory	0.0592239	1.07693	5.46901
2019_08_26_exp1_TH	Tlx3	ChrimsonR_kv_eyfp_AAV	1	pyramidal	2	155	230.716	Point 24	584.543	71.6965	207.556	excitatory	0.0589893	1.0334	4.02555
2019_08_23_exp2_TH	Tlx3	ChrimsonR_kv_eyfp_AAV	2	pyramidal	2	144	-16.544	Point 22	503.127	18.1644	7.186	excitatory	1.25374	0.145098	2.55073
2019_08_22_exp3_TH	Tlx3	ChrimsonR_kv_eyfp_AAV	2	pyramidal	2	188	-15.8842	Point 12	615.173	73.3914	-70.324	excitatory	0.235981	0.551183	1.29441
2019_08_22_exp3_TH	Tlx3	ChrimsonR_kv_eyfp_AAV	2	pyramidal	2	188	-15.8842	Point 30	546.404	135.243	-67.584	excitatory	0.100224	1.38859	1.12354
2019_08_22_exp3_TH	Tlx3	ChrimsonR_kv_eyfp_AAV	2	pyramidal	2	188	-15.8842	Point 5	549.803	128.228	-62.424	excitatory	0.592872	0.410339	1.73727
2019_08_22_exp3_TH	Tlx3	ChrimsonR_kv_eyfp_AAV	2	pyramidal	2	188	-15.8842	Point 6	706.342	27.548	-62.424	excitatory	0.241068	0.478548	1.14374
2019_08_22_exp3_TH	Tlx3	ChrimsonR_kv_eyfp_AAV	2	pyramidal	2	188	-15.8842	Point 41	589.271	89.968	-92.834	excitatory	0.108904	1.26205	1.54195
2019_08_22_exp3_TH	Tlx3	ChrimsonR_kv_eyfp_AAV	1	pyramidal	2	245	-23.8437	Point 19	539.712	123.872	-78.574	excitatory	0.371522	0.545583	1.56995
2019_08_22_exp3_TH	Tlx3	ChrimsonR_kv_eyfp_AAV	1	pyramidal	2	245	-23.8437	Point 5	548.512	204.621	-62.424	excitatory	0.0688393	0.743112	2.42159
2019_08_22_exp3_TH	Tlx3	ChrimsonR_kv_eyfp_AAV	1	pyramidal	2	245	-23.8437	Point 32	526.84	165.537	-83.774	excitatory	0.196302	0.310411	1.26083
2019_08_22_exp3_TH	Tlx3	ChrimsonR_kv_eyfp_AAV	1	pyramidal	2	245	-23.8437	Point 21	566.51	245.289	-78.574	excitatory	0.450964	0.34422	1.47347
2019_08_22_exp3_TH	Tlx3	ChrimsonR_kv_eyfp_AAV	0	pyramidal	2	273	-4.73391	Point 5	545.642	233.667	-62.424	excitatory	0.719237	0.3877	1.37352
2019_08_22_exp3_TH	Tlx3	ChrimsonR_kv_eyfp_AAV	0	pyramidal	2	273	-4.73391	Point 32	523.97	194.583	-83.774	excitatory	1.56279	0.103298	1.10985
2019_08_09_exp3_TH	Tlx3	ChrimsonR_kv_eyfp_AAV	1	pyramidal	2	189	321.408	Point 29	511.853	-36.8011	375.296	excitatory	0.143951	0.639282	2.20624
2019_08_09_exp2_TH	Tlx3	ChrimsonR_kv_eyfp_AAV	1	pyramidal	2	160	245.156	Point 14	661.359	-370.213	229.966	excitatory	0.416851	0.446773	1.26175
2019_08_09_exp2_TH	Tlx3	ChrimsonR_kv_eyfp_AAV	1	pyramidal	2	160	245.156	Point 2	651.202	-327.403	249.206	excitatory	0.476819	0.25653	0.817151
2019_08_09_exp2_TH	Tlx3	ChrimsonR_kv_eyfp_AAV	1	pyramidal	2	160	245.156	Point 22	713.725	-392.948	221.816	excitatory	1.54194	0.248245	2.11802
2019_08_08_exp2_TH	Tlx3	ChrimsonR_kv_eyfp_AAV	0	pyramidal	2	253	318	Point 63	689.084	-592.535	204.676	excitatory	0.138866	0.630287	1.23874
2019_08_08_exp1_TH	Tlx3	ChrimsonR_kv_eyfp_AAV	1	pyramidal	2	217	240.486	Point 1	553.11	223.028	236.456	excitatory	0.510718	0.281969	1.33509
2019_07_22_exp2_TH	Rorb	Ai167	2	pyramidal	2	209	345.436	Point 1	349.619	-91.2433	330.586	excitatory	0.140737	1.04221	2.09866
2019_07_22_exp2_TH	Rorb	Ai167	2	pyramidal	2	209	345.436	Point 26	366.435	195.152	308.926	excitatory	0.598231	0.566773	1.7223
2019_07_22_exp2_TH	Rorb	Ai167	0	pyramidal	2	258	323.836	Point 23	385.389	5.73835	312.536	excitatory	0.13819	0.758595	1.49389
2019_07_22_exp1_TH	Rorb	Ai167	3	pyramidal	2	175	398.816	Point 28	429.612	116.215	431.716	excitatory	0.218321	0.874971	3.11493
2019_07_22_exp1_TH	Rorb	Ai167	0	pyramidal	2	247	409.886	Point 12	572.919	24.0435	425.476	excitatory	0.105903	1.12361	1.76175
2019_07_22_exp1_TH	Rorb	Ai167	0	pyramidal	2	247	409.886	Point 1	319.712	260.736	388.616	excitatory	0.297746	0.503558	1.30099
2019_07_22_exp1_TH	Rorb	Ai167	0	pyramidal	2	247	409.886	Point 27	598.17	-180.56	414.986	excitatory	0.107661	0.975465	1.28069
2019_07_09_exp2_TH	Rorb	ChrimsonR_kv_eyfp_AAV	3	pyramidal	2	244	341.764	Point 15	439.744	20.887	374.454	excitatory	0.23973	0.52598	3.67237
2019_07_09_exp2_TH	Rorb	ChrimsonR_kv_eyfp_AAV	3	pyramidal	2	244	341.764	Point 34	443.018	93.8414	372.714	excitatory	0.300014	0.705379	1.8512
2019_07_09_exp2_TH	Rorb	ChrimsonR_kv_eyfp_AAV	3	pyramidal	2	244	341.764	Point 1	503.235	-136.993	374.384	excitatory	0.136576	0.680121	1.35254
2019_07_09_exp2_TH	Rorb	ChrimsonR_kv_eyfp_AAV	3	pyramidal	2	244	341.764	Point 41	377.459	193.544	381.904	excitatory	0.23798	0.68673	1.8451
2019_07_09_exp2_TH	Rorb	ChrimsonR_kv_eyfp_AAV	3	pyramidal	2	244	341.764	Point 22	359.996	-100.594	372.704	excitatory	0.277486	0.419913	1.5819
2019_07_09_exp2_TH	Rorb	ChrimsonR_kv_eyfp_AAV	2	pyramidal	2	214	343.62	Point 14	464.355	190.594	374.454	excitatory	0.992808	0.27598	0.972511
2019_07_09_exp2_TH	Rorb	ChrimsonR_kv_eyfp_AAV	2	pyramidal	2	214	343.62	Point 37	487.661	119.612	372.714	excitatory	0.0929015	0.846146	1.7556
2019_07_09_exp2_TH	Rorb	ChrimsonR_kv_eyfp_AAV	2	pyramidal	2	214	343.62	Point 36	417.434	117.437	372.714	excitatory	0.637837	0.411669	2.90177
2019_07_09_exp2_TH	Rorb	ChrimsonR_kv_eyfp_AAV	2	pyramidal	2	214	343.62	Point 1	498.871	-39.4764	374.384	excitatory	0.0519204	1.09247	0.952986
2019_07_09_exp2_TH	Rorb	ChrimsonR_kv_eyfp_AAV	2	pyramidal	2	214	343.62	Point 3	475.072	137.765	374.384	excitatory	1.09997	0.299786	1.95074
2019_07_09_exp2_TH	Rorb	ChrimsonR_kv_eyfp_AAV	2	pyramidal	2	214	343.62	Point 9	325.773	42.3606	374.384	excitatory	0.237103	0.529214	0.83622
2019_07_09_exp2_TH	Rorb	ChrimsonR_kv_eyfp_AAV	2	pyramidal	2	214	343.62	Point 41	373.095	291.061	381.904	excitatory	0.390677	0.580025	1.4512
2019_07_09_exp2_TH	Rorb	ChrimsonR_kv_eyfp_AAV	2	pyramidal	2	214	343.62	Point 22	355.633	-3.07729	372.704	excitatory	0.119558	0.99582	0.62155
2019_07_09_exp2_TH	Rorb	ChrimsonR_kv_eyfp_AAV	2	pyramidal	2	214	343.62	Point 25	293.181	217.752	372.704	excitatory	0.18031	0.623185	2.25219
2019_07_09_exp2_TH	Rorb	ChrimsonR_kv_eyfp_AAV	2	pyramidal	2	214	343.62	Point 26	381.854	267.09	372.704	excitatory	0.163624	0.563292	1.43719
2019_07_09_exp2_TH	Rorb	ChrimsonR_kv_eyfp_AAV	2	pyramidal	2	214	343.62	Point 39	445.263	280.949	381.904	excitatory	0.395116	0.471961	2.87632
2019_07_09_exp2_TH	Rorb	ChrimsonR_kv_eyfp_AAV	1	pyramidal	2	199	360.62	Point 11	488.804	62.2935	374.454	excitatory	0.085665	0.636388	2.59511
2019_07_09_exp2_TH	Rorb	ChrimsonR_kv_eyfp_AAV	1	pyramidal	2	199	360.62	Point 15	412.626	247.108	374.454	excitatory	0.430718	0.366754	1.71601
2019_07_09_exp2_TH	Rorb	ChrimsonR_kv_eyfp_AAV	1	pyramidal	2	199	360.62	Point 34	415.9	320.062	372.714	excitatory	0.262512	0.589455	1.80557
2019_07_09_exp2_TH	Rorb	ChrimsonR_kv_eyfp_AAV	1	pyramidal	2	199	360.62	Point 7	323.421	226.667	374.384	excitatory	0.545634	0.432874	1.17855
2019_07_09_exp2_TH	Rorb	ChrimsonR_kv_eyfp_AAV	1	pyramidal	2	199	360.62	Point 28	451.072	169.435	372.704	excitatory	0.414791	0.376641	1.85694
2019_07_09_exp2_TH	Rorb	ChrimsonR_kv_eyfp_AAV	1	pyramidal	2	199	360.62	Point 22	332.878	125.627	372.704	excitatory	0.274886	0.578488	1.18234
2019_07_09_exp1_TH	Rorb	ChrimsonR_kv_eyfp_AAV	3	pyramidal	2	268	343.844	Point 16	370.381	100.503	374.134	excitatory	0.387775	0.537528	1.25145
2019_07_09_exp1_TH	Rorb	ChrimsonR_kv_eyfp_AAV	3	pyramidal	2	268	343.844	Point 31	399.442	89.4798	389.094	excitatory	0.175105	0.445414	1.14922
2019_07_09_exp1_TH	Rorb	ChrimsonR_kv_eyfp_AAV	3	pyramidal	2	268	343.844	Point 4	396.893	-90.2174	379.574	excitatory	0.376736	0.431774	1.76042
2019_07_09_exp1_TH	Rorb	ChrimsonR_kv_eyfp_AAV	3	pyramidal	2	268	343.844	Point 22	517.207	110.474	379.754	excitatory	0.16054	0.56848	1.71297
2019_07_09_exp1_TH	Rorb	ChrimsonR_kv_eyfp_AAV	3	pyramidal	2	268	343.844	Point 24	463.81	126.142	379.754	excitatory	0.194501	0.452454	1.36805
2019_07_09_exp1_TH	Rorb	ChrimsonR_kv_eyfp_AAV	2	pyramidal	2	226	338.004	Point 31	395.627	111.511	389.094	excitatory	0.0473938	1.59727	1.53226
2019_07_09_exp1_TH	Rorb	ChrimsonR_kv_eyfp_AAV	2	pyramidal	2	226	338.004	Point 36	453.494	188.397	381.914	excitatory	0.429311	0.594699	0.936841
2019_07_09_exp1_TH	Rorb	ChrimsonR_kv_eyfp_AAV	2	pyramidal	2	226	338.004	Point 34	420.051	232.476	381.914	excitatory	0.885785	0.275028	2.31648
2019_07_09_exp1_TH	Rorb	ChrimsonR_kv_eyfp_AAV	2	pyramidal	2	226	338.004	Point 4	393.078	-68.1858	379.574	excitatory	0.17859	0.87477	2.11538
2019_07_09_exp1_TH	Rorb	ChrimsonR_kv_eyfp_AAV	2	pyramidal	2	226	338.004	Point 20	494.817	141.545	374.134	excitatory	0.22975	0.581621	2.28631
2019_07_09_exp1_TH	Rorb	ChrimsonR_kv_eyfp_AAV	2	pyramidal	2	226	338.004	Point 22	513.392	132.505	379.754	excitatory	0.256318	0.630693	0.944642
2019_07_09_exp1_TH	Rorb	ChrimsonR_kv_eyfp_AAV	0	pyramidal	2	230	322.744	Point 12	504.964	133.936	379.574	excitatory	0.28513	0.629163	2.8566
2019_07_09_exp1_TH	Rorb	ChrimsonR_kv_eyfp_AAV	0	pyramidal	2	230	322.744	Point 16	369.872	269.255	374.134	excitatory	1.45789	0.324278	0.972716
2019_07_09_exp1_TH	Rorb	ChrimsonR_kv_eyfp_AAV	0	pyramidal	2	230	322.744	Point 5	497.72	124.689	379.574	excitatory	0.242167	0.723255	2.58435
2019_07_09_exp1_TH	Rorb	ChrimsonR_kv_eyfp_AAV	0	pyramidal	2	230	322.744	Point 9	486.986	238.683	379.574	excitatory	0.276544	0.588775	1.18985
2019_07_09_exp1_TH	Rorb	ChrimsonR_kv_eyfp_AAV	0	pyramidal	2	230	322.744	Point 40	539.16	413.034	381.914	excitatory	0.571783	0.235796	0.996132
2019_06_28_exp2_TH	Rorb	ChrimsonR_kv_eyfp_AAV	1	pyramidal	2	177	-5618.7	Point 11	523.333	-291.603	-5626.47	excitatory	0.121355	0.677454	1.38255
2019_06_28_exp2_TH	Rorb	ChrimsonR_kv_eyfp_AAV	1	pyramidal	2	177	-5618.7	Point 10	578.446	8.93525	-5618.63	excitatory	0.10531	1.09954	1.29111
2019_06_28_exp2_TH	Rorb	ChrimsonR_kv_eyfp_AAV	1	pyramidal	2	177	-5618.7	Point 18	572.137	-310.671	-5626.47	excitatory	0.166731	0.728804	3.66746
2019_06_28_exp2_TH	Rorb	ChrimsonR_kv_eyfp_AAV	1	pyramidal	2	177	-5618.7	Point 5	543.928	45.1073	-5618.64	excitatory	0.439494	0.374699	2.40541
2019_06_28_exp2_TH	Rorb	ChrimsonR_kv_eyfp_AAV	1	pyramidal	2	177	-5618.7	Point 6	553.442	-82.7958	-5618.64	excitatory	0.310017	0.460026	1.03135
2019_06_28_exp1_TH	Rorb	ChrimsonR_kv_eyfp_AAV	2	pyramidal	2	247	-5644.11	Point 12	423.184	220.663	-5649.12	excitatory	0.240271	0.64724	1.90347
2019_06_28_exp1_TH	Rorb	ChrimsonR_kv_eyfp_AAV	2	pyramidal	2	247	-5644.11	Point 35	402.876	60.2025	-5657.93	excitatory	0.423406	0.412884	1.06874
2019_06_28_exp1_TH	Rorb	ChrimsonR_kv_eyfp_AAV	2	pyramidal	2	247	-5644.11	Point 33	559.506	264.642	-5657.93	excitatory	0.17926	0.953141	1.37544
2019_06_28_exp1_TH	Rorb	ChrimsonR_kv_eyfp_AAV	0	pyramidal	2	256	-5637.3	Point 5	498.176	-5.21291	-5635.42	excitatory	0.12459	0.632677	2.2254
2019_06_06_exp2_TH	Tlx3	ChrimsonR_kv_eyfp_AAV	3	pyramidal	2	231	564.995	Point 42	571.873	-292.824	671.825	excitatory	0.178409	0.462967	2.53335
2019_06_06_exp2_TH	Tlx3	ChrimsonR_kv_eyfp_AAV	3	pyramidal	2	231	564.995	Point 27	597.816	-296.855	619.755	excitatory	0.334996	0.475233	1.78804
2019_06_06_exp2_TH	Tlx3	ChrimsonR_kv_eyfp_AAV	1	pyramidal	2	251	598.665	Point 13	748.997	-185.092	626.585	excitatory	0.301343	0.693629	1.41759
2019_06_06_exp2_TH	Tlx3	ChrimsonR_kv_eyfp_AAV	1	pyramidal	2	251	598.665	Point 14	704.551	-75.4635	626.585	excitatory	1.2528	0.267527	1.26564
2019_06_06_exp2_TH	Tlx3	ChrimsonR_kv_eyfp_AAV	1	pyramidal	2	251	598.665	Point 16	567.002	-166.83	626.585	excitatory	0.412881	0.447164	1.16503
2019_06_06_exp2_TH	Tlx3	ChrimsonR_kv_eyfp_AAV	1	pyramidal	2	251	598.665	Point 37	611.101	-172.76	609.425	excitatory	0.477531	0.289616	1.43888
2019_06_06_exp2_TH	Tlx3	ChrimsonR_kv_eyfp_AAV	1	pyramidal	2	251	598.665	Point 48	634.289	-292.412	671.825	excitatory	0.146526	0.767178	1.33175
2019_06_06_exp2_TH	Tlx3	ChrimsonR_kv_eyfp_AAV	1	pyramidal	2	251	598.665	Point 28	565.002	-172.183	619.755	excitatory	0.47169	0.288981	1.26084
2019_06_06_exp2_TH	Tlx3	ChrimsonR_kv_eyfp_AAV	1	pyramidal	2	251	598.665	Point 20	617.205	-177.658	626.585	excitatory	0.252001	0.648724	1.16554
2019_06_06_exp2_TH	Tlx3	ChrimsonR_kv_eyfp_AAV	1	pyramidal	2	251	598.665	Point 39	569.592	-297.472	609.425	excitatory	0.176092	0.384481	1.99928
2019_06_06_exp1_TH	Tlx3	ChrimsonR_kv_eyfp_AAV	3	pyramidal	2	223	484.555	Point 50	715.185	-144.223	540.615	excitatory	0.304859	0.670193	1.75962
2019_06_06_exp1_TH	Tlx3	ChrimsonR_kv_eyfp_AAV	3	pyramidal	2	223	484.555	Point 42	706.519	-179.407	536.405	excitatory	3.49791	0.15357	1.8071
2019_06_06_exp1_TH	Tlx3	ChrimsonR_kv_eyfp_AAV	1	pyramidal	2	243	522.355	Point 42	706.308	32.1108	536.405	excitatory	0.340502	0.494919	1.51419
2019_06_06_exp1_TH	Tlx3	ChrimsonR_kv_eyfp_AAV	0	pyramidal	2	240	500.005	Point 50	715.462	152.684	540.615	excitatory	0.417297	0.343459	1.10857
2019_06_06_exp1_TH	Tlx3	ChrimsonR_kv_eyfp_AAV	0	pyramidal	2	240	500.005	Point 4	730.035	152.697	554.375	excitatory	0.0688594	0.740367	0.969078
2019_06_06_exp1_TH	Tlx3	ChrimsonR_kv_eyfp_AAV	0	pyramidal	2	240	500.005	Point 6	615.695	132.925	549.785	excitatory	1.06851	0.251705	2.55524
2019_06_06_exp1_TH	Tlx3	ChrimsonR_kv_eyfp_AAV	0	pyramidal	2	240	500.005	Point 40	595.856	124.415	545.575	excitatory	1.11749	0.333305	2.75512
2019_06_05_exp3_TH	Rorb	ChrimsonR_kv_eyfp_AAV	1	pyramidal	2	187	598.675	Point 20	412.201	-109.542	568.385	excitatory	0.0631508	0.978108	1.32525
2019_06_05_exp3_TH	Rorb	ChrimsonR_kv_eyfp_AAV	1	pyramidal	2	187	598.675	Point 23	495.001	-42.5983	580.005	excitatory	0.250468	0.548244	3.97677
2019_06_05_exp3_TH	Rorb	ChrimsonR_kv_eyfp_AAV	1	pyramidal	2	187	598.675	Point 27	534.936	-158.671	571.245	excitatory	0.290501	0.580834	1.02437
2019_06_05_exp3_TH	Rorb	ChrimsonR_kv_eyfp_AAV	0	pyramidal	2	266	598.471	Point 26	434.06	-87.784	580.005	excitatory	0.141181	0.518497	1.09674
2019_06_05_exp2_TH	Rorb	ChrimsonR_kv_eyfp_AAV	1	pyramidal	2	202	542.485	Point 40	568.829	-351.715	534.485	excitatory	0.243235	0.584701	1.58126
2019_06_05_exp2_TH	Rorb	ChrimsonR_kv_eyfp_AAV	1	pyramidal	2	202	542.485	Point 28	557.964	-125.379	541.315	excitatory	1.8415	0.15531	1.07555
2019_06_05_exp1_TH	Rorb	ChrimsonR_kv_eyfp_AAV	2	pyramidal	2	245	476.825	Point 40	515.437	-44.1723	477.375	excitatory	0.839082	0.151341	3.14831
2019_06_05_exp1_TH	Rorb	ChrimsonR_kv_eyfp_AAV	1	pyramidal	2	185	483.145	Point 13	506.822	111.655	500.315	excitatory	1.18469	0.279781	1.69676
2019_06_05_exp1_TH	Rorb	ChrimsonR_kv_eyfp_AAV	1	pyramidal	2	185	483.145	Point 31	401.983	20.8804	477.375	excitatory	0.267944	0.85092	1.6721
2019_06_05_exp1_TH	Rorb	ChrimsonR_kv_eyfp_AAV	1	pyramidal	2	185	483.145	Point 4	501.839	168.113	517.945	excitatory	0.861382	0.320932	2.60097
2019_06_05_exp1_TH	Rorb	ChrimsonR_kv_eyfp_AAV	1	pyramidal	2	185	483.145	Point 40	506.02	75.0504	477.375	excitatory	0.171761	0.418459	2.91474
2019_06_05_exp1_TH	Rorb	ChrimsonR_kv_eyfp_AAV	1	pyramidal	2	185	483.145	Point 28	455.218	-115.848	503.545	excitatory	0.519942	0.347212	2.27639
2019_06_05_exp1_TH	Rorb	ChrimsonR_kv_eyfp_AAV	1	pyramidal	2	185	483.145	Point 21	571.172	8.83087	503.545	excitatory	0.372727	0.32331	2.5448
2019_05_29_exp1_TH	Rorb	ChrimsonR_kv_eyfp_AAV	2	pyramidal	2	143	591.225	Point 48	559.841	170.872	555.055	excitatory	0.0485601	1.16065	1.62593
2019_05_29_exp1_TH	Rorb	ChrimsonR_kv_eyfp_AAV	2	pyramidal	2	143	591.225	Point 40	547.678	273.43	563.125	excitatory	0.0711876	1.05384	3.14784
2019_05_29_exp1_TH	Rorb	ChrimsonR_kv_eyfp_AAV	1	pyramidal	2	148	598.535	Point 10	315.169	292.7	596.195	excitatory	0.19134	1.00542	1.35953
2019_05_29_exp1_TH	Rorb	ChrimsonR_kv_eyfp_AAV	0	pyramidal	2	217	592.615	Point 40	533.875	409.433	563.125	excitatory	0.324425	0.396534	4.00962
2019_04_17_exp1_TH	Ntsr1	Ai167	2	pyramidal	2	195	107.705	Point 1	895.782	-81.4427	158.335	excitatory	0.0928584	1.0856	1.19146
2019_04_05_exp2_TH	Rorb	ChrimsonR_kv_eyfp_AAV	3	pyramidal	2	224	112.345	Point 19	524.924	216.056	132.975	excitatory	0.89712	0.368453	1.32651
2019_04_05_exp2_TH	Rorb	ChrimsonR_kv_eyfp_AAV	3	pyramidal	2	224	112.345	Point 35	673.35	180.122	156.075	excitatory	0.131238	0.742874	2.94922
2019_04_05_exp2_TH	Rorb	ChrimsonR_kv_eyfp_AAV	2	pyramidal	2	206	101.785	Point 19	530.521	139.366	132.975	excitatory	0.113407	0.622306	1.70599
2019_04_05_exp2_TH	Rorb	ChrimsonR_kv_eyfp_AAV	2	pyramidal	2	206	101.785	Point 23	565.524	-2.26215	132.975	excitatory	0.266874	0.850364	3.88032
2019_04_05_exp2_TH	Rorb	ChrimsonR_kv_eyfp_AAV	0	pyramidal	2	185	114.245	Point 14	589.476	-120.331	143.985	excitatory	0.187785	0.580665	1.1217
2019_04_05_exp2_TH	Rorb	ChrimsonR_kv_eyfp_AAV	0	pyramidal	2	185	114.245	Point 19	529.184	-41.0406	132.975	excitatory	0.647941	0.599275	1.26415
2019_04_05_exp2_TH	Rorb	ChrimsonR_kv_eyfp_AAV	0	pyramidal	2	185	114.245	Point 36	598.393	44.2915	147.305	excitatory	0.207164	0.480152	0.99759
2019_04_05_exp2_TH	Rorb	ChrimsonR_kv_eyfp_AAV	0	pyramidal	2	185	114.245	Point 38	370.197	57.6064	152.895	excitatory	0.0584852	0.565975	1.10497
2019_04_05_exp1_TH	Rorb	ChrimsonR_kv_eyfp_AAV	2	pyramidal	2	177	171.915	Point 40	478.766	60.3031	175.045	excitatory	0.0991611	0.688393	2.73149
2019_04_05_exp1_TH	Rorb	ChrimsonR_kv_eyfp_AAV	2	pyramidal	2	177	171.915	Point 28	545.745	7.74582	198.945	excitatory	0.417909	0.360956	4.43865
2019_04_05_exp1_TH	Rorb	ChrimsonR_kv_eyfp_AAV	2	pyramidal	2	177	171.915	Point 39	579.56	85.8612	175.045	excitatory	0.210453	0.810955	4.8135
2019_04_05_exp1_TH	Rorb	ChrimsonR_kv_eyfp_AAV	0	pyramidal	2	220	191.725	Point 37	520.023	-26.1309	175.045	excitatory	1.35709	0.146231	2.56595
2019_03_27_exp2_TH	Rorb	Ai167	3	pyramidal	2	262	130.225	Point 10	566.978	193.285	113.255	excitatory	0.451696	0.178077	1.15172
2019_03_27_exp2_TH	Rorb	Ai167	3	pyramidal	2	262	130.225	Point 14	589.121	-187.632	112.625	excitatory	0.232016	0.393573	1.02617
2019_03_27_exp2_TH	Rorb	Ai167	3	pyramidal	2	262	130.225	Point 30	778.067	-468.925	176.785	excitatory	0.394853	0.601114	1.15043
2019_03_27_exp2_TH	Rorb	Ai167	2	pyramidal	2	252	152.885	Point 13	598.873	-49.5565	121.825	excitatory	0.822228	0.269587	1.43933
2019_03_27_exp2_TH	Rorb	Ai167	2	pyramidal	2	252	152.885	Point 1	444.173	32.225	131.715	excitatory	0.333342	0.419202	2.13646
2019_03_27_exp2_TH	Rorb	Ai167	0	pyramidal	2	311	169.145	Point 30	755.785	-274.596	176.785	excitatory	0.0978008	0.709505
2019_03_27_exp2_TH	Rorb	Ai167	0	pyramidal	2	311	169.145	Point 28	683.353	-158.486	176.785	excitatory	0.305691	0.296339	1.34673
2019_03_27_exp1_TH	Rorb	Ai167	2	pyramidal	2	166	152.885	Point 7	448.092	10.0417	170.935	excitatory	0.0619894	0.84809	1.97412
2019_03_25_exp2_TH	Rorb	Ai167	3	pyramidal	2	202	159.015	Point 10	330.756	60.5054	200.825	excitatory	0.0491581	1.08147	2.34549
2019_03_25_exp2_TH	Rorb	Ai167	3	pyramidal	2	202	159.015	Point 13	302.99	-8.76978	190.315	excitatory	0.0586166	0.977965	0.853456
2019_03_25_exp2_TH	Rorb	Ai167	3	pyramidal	2	202	159.015	Point 14	459.799	100.996	190.315	excitatory	2.84879	0.229075	1.30486
2019_03_25_exp2_TH	Rorb	Ai167	3	pyramidal	2	202	159.015	Point 7	400.617	43.4043	211.225	excitatory	0.677066	0.405446	1.2105
2019_03_25_exp2_TH	Rorb	Ai167	2	pyramidal	2	155	154.825	Point 15	376.483	98.268	183.315	excitatory	0.0817154	1.04451	0.893508
2019_03_25_exp2_TH	Rorb	Ai167	2	pyramidal	2	155	154.825	Point 14	458.511	116.12	190.315	excitatory	0.28961	0.85732	1.35735
2019_03_25_exp2_TH	Rorb	Ai167	2	pyramidal	2	155	154.825	Point 19	414.28	319.849	169.505	excitatory	0.0902199	0.865737	0.996529
2019_03_25_exp2_TH	Rorb	Ai167	2	pyramidal	2	155	154.825	Point 33	505.16	-179.199	231.415	excitatory	0.127535	0.942243	2.71652
2019_03_25_exp2_TH	Rorb	Ai167	0	pyramidal	2	147	151.155	Point 15	368.08	-9.72345	183.315	excitatory	0.255116	0.605759	1.79806
2019_03_25_exp2_TH	Rorb	Ai167	0	pyramidal	2	147	151.155	Point 14	450.108	8.12908	190.315	excitatory	0.024482	0.485694	0.226418
2019_03_25_exp2_TH	Rorb	Ai167	0	pyramidal	2	147	151.155	Point 17	421.254	196.593	196.945	excitatory	0.133641	0.684518	1.42336
2019_03_25_exp2_TH	Rorb	Ai167	0	pyramidal	2	147	151.155	Point 6	471.906	23.2011	220.565	excitatory	0.012434	0.487129	1.01325
2019_03_25_exp2_TH	Rorb	Ai167	0	pyramidal	2	147	151.155	Point 8	478.144	-115.436	211.225	excitatory	0.549574	0.355114	2.61628
2019_03_25_exp1_TH	Rorb	Ai167	1	pyramidal	2	157	176.485	Point 14	416.502	126.734	171.535	excitatory	0.101986	1.20344	2.043
2019_03_25_exp1_TH	Rorb	Ai167	1	pyramidal	2	157	176.485	Point 32	480.665	-147.598	219.295	excitatory	0.261167	0.765033	1.61481
2019_03_20_exp1_TH	Rorb	ChrimsonR_kv_eyfp_AAV	3	pyramidal	2	130	12.4951	Point 12	312.718	-158.262	34.585	excitatory	0.24007	0.691001	2.70485
2019_03_20_exp1_TH	Rorb	ChrimsonR_kv_eyfp_AAV	3	pyramidal	2	130	12.4951	Point 3	318.564	-241.493	34.585	excitatory	0.911475	0.456973	2.38637
2019_03_20_exp1_TH	Rorb	ChrimsonR_kv_eyfp_AAV	2	pyramidal	2	141	-7.44499	Point 6	213.939	28.7121	34.585	excitatory	0.63329	0.463137	1.79767
2019_03_20_exp1_TH	Rorb	ChrimsonR_kv_eyfp_AAV	2	pyramidal	2	141	-7.44499	Point 44	318.989	-130.382	27.295	excitatory	0.187417	0.541838	1.57802
2019_03_20_exp1_TH	Rorb	ChrimsonR_kv_eyfp_AAV	2	pyramidal	2	141	-7.44499	Point 22	243.671	80.1484	37.675	excitatory	0.131426	0.834876	2.19193
2019_03_14_exp1_TH	Tlx3	ChrimsonR_kv_eyfp_AAV	3	pyramidal	2	187	231.745	Point 24	499.398	-22.4805	207.545	excitatory	0.148168	0.541714	1.32725
2019_03_14_exp1_TH	Tlx3	ChrimsonR_kv_eyfp_AAV	1	pyramidal	2	160	233.051	Point 11	537.447	-52	186.375	excitatory	0.331036	0.624027	1.34809
2019_03_14_exp1_TH	Tlx3	ChrimsonR_kv_eyfp_AAV	0	pyramidal	2	189	227.149	Point 13	518.048	-153.57	186.375	excitatory	0.201128	0.389088	0.84186
2019_03_14_exp1_TH	Tlx3	ChrimsonR_kv_eyfp_AAV	0	pyramidal	2	189	227.149	Point 2	580.108	8.63132	200.755	excitatory	0.0985539	0.626175	1.11097
2019_03_14_exp1_TH	Tlx3	ChrimsonR_kv_eyfp_AAV	0	pyramidal	2	189	227.149	Point 23	563.675	-111.079	207.545	excitatory	0.507269	0.447085	1.57327
2019_02_28_exp2_TH	Tlx3	ChrimsonR_kv_eyfp_AAV	1	pyramidal	2	231	352.349	Point 11	472.183	-57.2213	339.149	excitatory	0.68749	0.277889	0.909418
2019_02_28_exp2_TH	Tlx3	ChrimsonR_kv_eyfp_AAV	1	pyramidal	2	231	352.349	Point 31	556.878	-109.5	322.019	excitatory	0.291044	0.359049	1.42683
2019_02_28_exp2_TH	Tlx3	ChrimsonR_kv_eyfp_AAV	1	pyramidal	2	231	352.349	Point 30	575.54	-144.589	322.019	excitatory	0.162063	0.436215	1.99816
2019_02_28_exp2_TH	Tlx3	ChrimsonR_kv_eyfp_AAV	1	pyramidal	2	231	352.349	Point 34	455.383	-230.145	322.019	excitatory	0.368972	0.421443	0.945083
2019_02_28_exp2_TH	Tlx3	ChrimsonR_kv_eyfp_AAV	1	pyramidal	2	231	352.349	Point 6	478.313	-75.8331	339.149	excitatory	0.11687	1.0834	5.2
2019_02_28_exp1_TH	Tlx3	ChrimsonR_kv_eyfp_AAV	3	pyramidal	2	239	276.649	Point 17	515.623	-139.904	322.519	excitatory	0.272624	0.38015	0.915292
2019_02_28_exp1_TH	Tlx3	ChrimsonR_kv_eyfp_AAV	3	pyramidal	2	239	276.649	Point 35	466.566	-72.3574	314.899	excitatory	0.321457	0.496009	1.41893
2019_02_28_exp1_TH	Tlx3	ChrimsonR_kv_eyfp_AAV	3	pyramidal	2	239	276.649	Point 34	561.806	-78.1221	314.899	excitatory	0.12039	0.500405	1.87684
2019_02_28_exp1_TH	Tlx3	ChrimsonR_kv_eyfp_AAV	0	pyramidal	2	274	279.389	Point 14	474.183	91.9344	320.139	excitatory	0.328292	0.361121	1.25115
2019_02_28_exp1_TH	Tlx3	ChrimsonR_kv_eyfp_AAV	0	pyramidal	2	274	279.389	Point 37	458.737	100.702	301.389	excitatory	0.294039	0.403347	1.8636
2019_02_28_exp1_TH	Tlx3	ChrimsonR_kv_eyfp_AAV	0	pyramidal	2	274	279.389	Point 34	550.26	176.299	314.899	excitatory	0.858814	0.132293	1.29558
2019_02_18_exp2_TH	Tlx3	ChrimsonR_kv_eyfp_AAV	2	pyramidal	2	201	866.746	Point 25	652.004	97.1347	867.226	excitatory	0.1221	0.77496	1.32042
2019_02_18_exp2_TH	Tlx3	ChrimsonR_kv_eyfp_AAV	1	pyramidal	2	233	867.496	Point 19	554.628	114.473	867.436	excitatory	0.245153	1.15952	2.04443
2019_02_15_exp2_TH	Tlx3	ChrimsonR_kv_eyfp_AAV	3	pyramidal	2	316	640.036	Point 14	589.759	118.568	702.046	excitatory	0.083964	0.872729	2.28423
2019_02_15_exp2_TH	Tlx3	ChrimsonR_kv_eyfp_AAV	3	pyramidal	2	316	640.036	Point 5	669.385	133.517	708.266	excitatory	0.17773		2.925
2019_02_15_exp2_TH	Tlx3	ChrimsonR_kv_eyfp_AAV	2	pyramidal	2	241	706.27	Point 1	635.535	196.631	708.266	excitatory	0.425475	0.623667	0.812973
2019_01_24_exp1_TH	Rorb	Ai167	3	pyramidal	2	150	449.986	Point 14	408.143	24.3429	410.576	excitatory	0.168908	0.779809	1.27253
2019_01_24_exp1_TH	Rorb	Ai167	2	pyramidal	2	165	454.636	Point 14	413.475	73.1893	410.576	excitatory	0.223602	0.630757	2.18558
2019_01_23_exp2_TH	Rorb	Ai167	3	pyramidal	2	239	525.456	Point 15	385.983	-53.4653	493.406	excitatory	1.15741	0.456052	1.72992
2019_01_23_exp2_TH	Rorb	Ai167	3	pyramidal	2	239	525.456	Point 27	437.548	-171.341	460.166	excitatory	0.040405	1.2776	1.25311
2019_01_23_exp2_TH	Rorb	Ai167	2	pyramidal	2	248	515.426	Point 12	444.926	57.6117	497.156	excitatory	0.811836	0.264564	1.68164
2019_01_23_exp2_TH	Rorb	Ai167	2	pyramidal	2	248	515.426	Point 6	451.068	43.9334	488.016	excitatory	0.0772744	0.832672	2.07216
2019_01_23_exp2_TH	Rorb	Ai167	2	pyramidal	2	248	515.426	Point 3	476.016	96.4462	488.016	excitatory	0.164093	0.710316	1.89236
2019_01_23_exp2_TH	Rorb	Ai167	1	pyramidal	2	214	503.896	Point 12	437.774	151.854	497.156	excitatory	0.167795	0.413508	1.87213
2019_01_23_exp2_TH	Rorb	Ai167	1	pyramidal	2	214	503.896	Point 3	468.864	190.689	488.016	excitatory	0.599144	0.207309	2.08838
2019_01_23_exp2_TH	Rorb	Ai167	0	pyramidal	2	317	530.118	Point 15	385.872	230.674	493.406	excitatory	0.316511	0.701294	2.11223
2019_01_23_exp2_TH	Rorb	Ai167	0	pyramidal	2	317	530.118	Point 3	493.38	215.564	488.016	excitatory	0.146759	0.657883	1.39752
2019_01_23_exp1_TH	Rorb	Ai167	3	pyramidal	2	278	625.456	Point 6	411.767	51.6386	584.366	excitatory	0.519634	0.576617	2.97287
2019_01_23_exp1_TH	Rorb	Ai167	3	pyramidal	2	278	625.456	Point 2	341.031	174.881	591.526	excitatory	0.331891	0.636408	1.91856
2019_01_23_exp1_TH	Rorb	Ai167	0	pyramidal	2	242	630.118	Point 16	443.323	-214.28	565.911	excitatory	0.476841	0.546142	1.04824
2019_01_23_exp1_TH	Rorb	Ai167	0	pyramidal	2	242	630.118	Point 5	422.872	-244.595	584.366	excitatory	0.307079	0.515214	1.32685
2019_01_23_exp1_TH	Rorb	Ai167	0	pyramidal	2	242	630.118	Point 9	583.019	-208.041	607.411	excitatory	0.147506	0.790133	1.97574
2019_01_23_exp1_TH	Rorb	Ai167	0	pyramidal	2	242	630.118	Point 21	371.584	-92.7296	574.341	excitatory	0.18563	0.835041	1.26867
2018_12_03_exp1_TH	Rorb	Ai167	2	pyramidal	2	143	568.096	Point 18	429.119	64.1058	616.096	excitatory	0.113888	0.963532	1.41239
2018_12_03_exp1_TH	Rorb	Ai167	2	pyramidal	2	143	568.096	Point 24	470.043	67.8251	651.796	excitatory	0.112323	0.769107	1.97916
2018_12_03_exp1_TH	Rorb	Ai167	2	pyramidal	2	143	568.096	Point 25	548.661	142.271	651.796	excitatory	0.114966	0.765182	1.85995
2018_12_03_exp1_TH	Rorb	Ai167	1	pyramidal	2	97	574.626	Point 18	444.227	-80.4427	616.096	excitatory	0.254148	0.577013	1.77731
2018_12_03_exp1_TH	Rorb	Ai167	1	pyramidal	2	97	574.626	Point 3	359.085	7.39161	540.276	excitatory	0.111408	0.72144	1.78806
2018_12_03_exp1_TH	Rorb	Ai167	1	pyramidal	2	97	574.626	Point 2	439.389	24.2549	540.276	excitatory	0.142126	0.635903	1.7146
2018_12_03_exp1_TH	Rorb	Ai167	0	pyramidal	2	222	567.726	Point 18	447.761	-194.54	616.096	excitatory	0.194445	0.854999	1.21893
2018_12_03_exp1_TH	Rorb	Ai167	0	pyramidal	2	222	567.726	Point 3	362.618	-106.705	540.276	excitatory	0.38849	0.384277	1.97547
2018_12_03_exp1_TH	Rorb	Ai167	0	pyramidal	2	222	567.726	Point 2	442.922	-89.842	540.276	excitatory	0.92312	0.270249	1.86743
2018_12_03_exp1_TH	Rorb	Ai167	0	pyramidal	2	222	567.726	Point 22	335.404	-280.67	637.366	excitatory	0.784982	0.508233	0.945559
2018_11_30_exp2_TH	Rorb	Ai167	0	pyramidal	2	185	779.506	Point 14	594.776	29.7323	822.336	excitatory	0.602339	0.416431	1.3918
2018_11_30_exp2_TH	Rorb	Ai167	0	pyramidal	2	185	779.506	Point 17	520.003	-254.647	790.896	excitatory	0.191698	0.583146	1.68071
2018_11_30_exp2_TH	Rorb	Ai167	0	pyramidal	2	185	779.506	Point 4	440.46	76.1833	745.406	excitatory	0.28537		4.56
2018_11_30_exp1_TH	Rorb	Ai167	1	pyramidal	2	100	648.7	Point 7	460.488	39.9813	648.836	excitatory	0.936031	0.335567	1.17032
2018_11_29_exp3_TH	Rorb	Ai167	1	pyramidal	2	262	539	Point 6	439.019	55.5522	452.326	excitatory	0.915602	0.619671	1.31938
2018_11_29_exp2_TH	Rorb	Ai167	3	pyramidal	2	197	595.446	Point 12	415.388	-62.2718	545.066	excitatory	0.277391	0.678933	1.02989
2018_09_26_exp4_TH	Rorb	Ai167	1	pyramidal	2	253	-499.596	TSeries_307_1	555.664	68.8859	-419.356	excitatory	0.0875	0.783413	3.96022
2018_09_26_exp4_TH	Rorb	Ai167	1	pyramidal	2	253	-499.596	TSeries_447_1	440.159	-29.3768	-458.496	excitatory	2.12969	0.134144	1.69353
2018_09_26_exp4_TH	Rorb	Ai167	1	pyramidal	2	253	-499.596	TSeries_447_3	463.442	-47.8987	-458.496	excitatory	0.121875	0.748241	5.135
2018_09_26_exp4_TH	Rorb	Ai167	1	pyramidal	2	253	-499.596	TSeries_27_2	431.217	-2.04286	-489.166	excitatory	0.332237	0.483721	5.8
2018_09_26_exp4_TH	Rorb	Ai167	1	pyramidal	2	253	-499.596	TSeries_627_3	426.914	19.8781	-479.456	excitatory	0.09375	0.449743	3.83658
2018_09_26_exp4_TH	Rorb	Ai167	1	pyramidal	2	253	-499.596	TSeries_147_1	464.523	-35.2752	-466.206	excitatory	0.0902778	1.08931	1.0744
2018_09_26_exp4_TH	Rorb	Ai167	1	pyramidal	2	253	-499.596	TSeries_147_3	473.745	-39.7735	-466.206	excitatory	0.070514	0.676521	1.64
2018_09_26_exp2_TH	Rorb	Ai167	2	pyramidal	2	212	-449.406	TSeries_30_1	483.375	-30.0311	-454.386	excitatory	1.12557	0.435263	1.40008
2018_09_26_exp2_TH	Rorb	Ai167	2	pyramidal	2	212	-449.406	TSeries_140_1	599.449	-31.2812	-427.986	excitatory	0.303833	0.879551	1.0123
2018_09_19_exp1_LH	Rorb	Ai167	1	pyramidal	2	275	8853.1	TSeries_207_1	400.395	14.5509	8875.52	excitatory	0.225781	0.720416	4.66267
2018_09_19_exp1_LH	Rorb	Ai167	1	pyramidal	2	275	8853.1	TSeries_328_1	424.164	-52.5069	8874.82	excitatory	0.401563	0.423298	1.18773
2018_09_11_exp2_CAB	Rorb	Ai167	2	pyramidal	2	200	-66.04	TSeries_507_1	374.21	87.7833	-10.16	excitatory	0.460938	0.459468	2.08952
2018_09_11_exp2_CAB	Rorb	Ai167	1	pyramidal	2	168	-74.04	TSeries_387_1	344.404	-49.8995	-17.87	excitatory	1.01875	0.315212	1.76013
2018_09_11_exp2_CAB	Rorb	Ai167	1	pyramidal	2	168	-74.04	TSeries_507_4	362.993	-130.398	-10.16	excitatory	0.715625	0.448017	2.25657
2018_09_11_exp2_CAB	Rorb	Ai167	1	pyramidal	2	168	-74.04	TSeries_1307_3	290.216	-8.25262	-92.57	excitatory	0.86875	0.378058	1.4421
2018_09_11_exp2_CAB	Rorb	Ai167	1	pyramidal	2	168	-74.04	TSeries_27_4	383.204	-7.50726	-17.87	excitatory	0.0491299	0.767239	1.45114
2018_09_11_exp2_CAB	Rorb	Ai167	1	pyramidal	2	168	-74.04	TSeries_27_5	425.156	-52.5898	-17.87	excitatory	0.09375	1.05441	0.925
2018_09_10_exp2_TH	Rorb	Ai167	0	pyramidal	2	211	-410.806	TSeries_812_7	504.948	-42.858	-411.196	excitatory	0.256404	0.578688	2.25327
2018_09_10_exp2_TH	Rorb	Ai167	0	pyramidal	2	211	-410.806	TSeries_812_6	496.082	236.324	-411.196	excitatory	0.170522	0.573949	2.62888
2018_09_10_exp2_TH	Rorb	Ai167	0	pyramidal	2	211	-410.806	TSeries_227_1	567.113	27.675	-369.186	excitatory	0.309508	0.614821	2.0959
2018_09_10_exp2_CAB	Rorb	Ai167	2	pyramidal	2	203	25.31	TSeries_547_1	447.018	-37.741	55.34	excitatory	0.08125	0.992385	0.732
2018_09_10_exp2_CAB	Rorb	Ai167	2	pyramidal	2	203	25.31	TSeries_247_2	482.577	10.6743	24.67	excitatory	0.0546875	0.819981	1.71341
2018_09_10_exp1_CAB	Rorb	Ai167	2	pyramidal	2	253	-115.549	TSeries_1207_3	417.962	-11.3399	-30.1	excitatory	0.815625	0.311147	2.1248
2018_09_10_exp1_CAB	Rorb	Ai167	2	pyramidal	2	253	-115.549	TSeries_507_1	396.193	142.625	-44.83	excitatory	0.028125	1.82443	5.86933
2018_09_10_exp1_CAB	Rorb	Ai167	2	pyramidal	2	253	-115.549	TSeries_507_3	433.25	33.577	-44.83	excitatory	0.425	0.406135	3.6176
2018_09_10_exp1_CAB	Rorb	Ai167	2	pyramidal	2	253	-115.549	TSeries_367_2	431.475	52.2478	-61.78	excitatory	0.334375	0.740355	2.34585
2018_09_10_exp1_CAB	Rorb	Ai167	2	pyramidal	2	253	-115.549	TSeries_367_3	419.721	45.1309	-61.78	excitatory	0.432813	0.676034	1.86705
2018_09_10_exp1_CAB	Rorb	Ai167	2	pyramidal	2	253	-115.549	TSeries_367_4	381.301	88.7933	-61.78	excitatory	0.342115	0.5439	3.75143
2018_09_10_exp1_CAB	Rorb	Ai167	1	pyramidal	2	253	-103.549	TSeries_507_2	406.912	-7.46284	-44.83	excitatory	0.264236	0.493274	3.98717
2018_09_10_exp1_CAB	Rorb	Ai167	1	pyramidal	2	253	-103.549	TSeries_127_1	503.515	52.4184	-80.69	excitatory	0.161366	0.640363	4.54439
2018_09_10_exp1_CAB	Rorb	Ai167	1	pyramidal	2	253	-103.549	TSeries_367_6	418.259	54.638	-61.78	excitatory	0.3	0.329708	1.97924
2018_08_21_exp6_TH	Scnn1a	Ai167	0	pyramidal	2	231	238.535	TSeries_30_2	396.195	-37.5429	251.865	excitatory	0.143092	0.711218	2.6352
2018_07_11_exp2_CAB	Rorb	Ai167	2	pyramidal	2		-40.01	TSeries_386_1		92.6848	-31.73	excitatory	0.235085	0.872862	3.72586
2018_06_29_exp2_TH	Rorb	Ai167	1	pyramidal	2	187	21.139	TSeries_29_2	437.751	36.1929	-9.393	excitatory	2.95833	0.120076	4.38524
2018_06_29_exp1_TH	Rorb	Ai167	1	pyramidal	2	215	-91.638	TSeries_448_5	391.442	53.5247	-64	excitatory	0.111842	0.847171	2.0458
2018_06_29_exp1_TH	Rorb	Ai167	1	pyramidal	2	215	-91.638	TSeries_448_3	385.193	9.53516	-64	excitatory	0.248821	0.656831	1.946
2018_06_29_exp1_TH	Rorb	Ai167	1	pyramidal	2	215	-91.638	TSeries_448_1	436.219	-37.1402	-64	excitatory	0.0888266	0.745614	1.93485
2018_06_29_exp1_TH	Rorb	Ai167	1	pyramidal	2	215	-91.638	TSeries_748_3	369.135	76.7169	-45	excitatory	0.478125	0.401926	2.00971
2018_06_29_exp1_TH	Rorb	Ai167	1	pyramidal	2	215	-91.638	TSeries_167_4	426.567	165.337	-94	excitatory	0.228125	0.510078	1.228
2018_06_29_exp1_TH	Rorb	Ai167	1	pyramidal	2	215	-91.638	TSeries_167_1	409.224	25.5446	-94	excitatory	0.171752	0.827402	1.73909
2018_06_29_exp1_TH	Rorb	Ai167	1	pyramidal	2	215	-91.638	TSeries_27_3	352.752	-88.3267	-110	excitatory	0.165516	0.622906	4.27871
2018_06_29_exp1_TH	Rorb	Ai167	1	pyramidal	2	215	-91.638	TSeries_27_6	338.685	139.16	-36.538	excitatory	0.178125	0.728604	1.5128
2018_06_29_exp1_TH	Rorb	Ai167	1	pyramidal	2	215	-91.638	TSeries_648_1	421.549	65.6064	-59	excitatory	0.084375	0.74784	0.910667
2018_06_29_exp1_TH	Rorb	Ai167	1	pyramidal	2	215	-91.638	TSeries_648_2	409.552	189.613	-59	excitatory	0.289062	0.655493	1.62571
2018_06_29_exp1_TH	Rorb	Ai167	1	pyramidal	2	215	-91.638	TSeries_868_3	408.003	125.033	-30	excitatory	0.349057	0.44123	2.92886
2018_06_29_exp1_AB	Rorb	Ai167	1	pyramidal	2	180	69	TSeries_1331_6	457.431	-121.146	-33.24	excitatory	0.579687	0.467757	2.16377
2018_06_29_exp1_AB	Rorb	Ai167	1	pyramidal	2	180	69	TSeries_1291_1	397.005	-190.574	-20.26	excitatory	0.218439	0.509547	1.64302
2018_06_29_exp1_AB	Rorb	Ai167	1	pyramidal	2	180	69	TSeries_270_10	461.034	70.9951	34.15	excitatory	0.100781	1.04862	1.67913
2018_06_29_exp1_AB	Rorb	Ai167	1	pyramidal	2	180	69	TSeries_270_9	488.135	87.3149	34.15	excitatory	0.339063	0.449573	1.08213
2018_06_29_exp1_AB	Rorb	Ai167	1	pyramidal	2	180	69	TSeries_270_2	447.053	10.9256	34.15	excitatory	1.08438	0.259681	1.66005
2018_06_29_exp1_AB	Rorb	Ai167	1	pyramidal	2	180	69	TSeries_470_3	394.31	173.642	17.6	excitatory	0.1375	0.785215	2.99543
2018_06_29_exp1_AB	Rorb	Ai167	1	pyramidal	2	180	69	TSeries_470_1	468.115	54.0115	17.6	excitatory	0.748438	0.409577	1.1875
2018_06_28_exp2_AB	Rorb	Ai167	0	pyramidal	2	210	-7.736	TSeries_509_5	496.864	7.59464	-56.691	excitatory	0.229687	0.504116	1.37431
2018_06_28_exp1_CAB	Rorb	Ai167	2	pyramidal	2	201	58.62	TSeries_149_2	408.988	17.4868	69.43	excitatory	0.106589	1.37129	1.11932
2018_06_28_exp1_CAB	Rorb	Ai167	2	pyramidal	2	201	58.62	TSeries_149_1	389.346	-12.9872	69.43	excitatory	0.244305	0.933632	1.80056
2018_06_18_exp2_TH	Rorb	Ai167	1	pyramidal	2	209	-87.622	TSeries_67_2	413.978	72.5176	-78.362	excitatory	0.470313	0.644952	1.443
2018_06_18_exp2_TH	Rorb	Ai167	1	pyramidal	2	209	-87.622	TSeries_187_2	368.127	64.5328	-55.502	excitatory	0.307813	0.541409	1.57365
2018_06_18_exp2_TH	Rorb	Ai167	1	pyramidal	2	209	-87.622	TSeries_147_1	349.197	15.359	-72.182	excitatory	0.1625	0.696446	5.35977
2018_06_18_exp2_AB	Rorb	Ai167	2	pyramidal	2	230	8.57	TSeries_1165_1	400.33	172.173	43.58	excitatory	0.151562	1.23926	1.4968
2018_06_18_exp2_AB	Rorb	Ai167	2	pyramidal	2	230	8.57	TSeries_272_3	410.198	205.353	66.89	excitatory	0.23125	0.679709	1.8956
2018_06_18_exp2_AB	Rorb	Ai167	1	pyramidal	2	230	25.57	TSeries_1125_2	316.778	-15.1005	14.79	excitatory	0.120313	0.986308	2.71709
2018_06_18_exp1_TH	Rorb	Ai167	1	pyramidal	2	269	-51.202	TSeries_232_3	527.81	-78.345	-79.972	excitatory	0.11612	0.62812	1.1335
2018_06_18_exp1_TH	Rorb	Ai167	1	pyramidal	2	269	-51.202	TSeries_232_1	505.911	-54.4206	-79.972	excitatory	0.153901	0.680529	5.05699
2018_06_18_exp1_TH	Rorb	Ai167	1	pyramidal	2	269	-51.202	TSeries_32_4	447.594	-72.8243	-102.422	excitatory	0.175038	0.598818	4.11786
2018_06_18_exp1_TH	Rorb	Ai167	1	pyramidal	2	269	-51.202	TSeries_894_3	499.516	73.2483	-60.152	excitatory	0.0658187	0.936836	1.90381
2018_05_16_exp1_AB	Rorb	Ai167	1	pyramidal	2	226	-62.083	TSeries_130_2	280.488	-0.584563	-42.893	excitatory	0.0640625	0.694962	2.96723
2018_05_02_exp3_TH	Scnn1a	Ai167	1	pyramidal	2	179	3.117	TSeries_217_2	457.918	-27.5903	-69.923	excitatory	0.207582	0.550152	1.14317
2018_05_02_exp2_TH	Scnn1a	Ai167	1	pyramidal	2	203	107.007	TSeries_198_1	411.244	190.311	67.617	excitatory	0.329688	0.427843	0.962818
2018_05_02_exp2_TH	Scnn1a	Ai167	0	pyramidal	2	207	127.007	TSeries_38_1	383.725	-39.521	96.187	excitatory	0.404687	0.630409	0.754159
2018_05_02_exp2_CAB	Scnn1a	Ai167	3	pyramidal	2	165	7447.56	TSeries_166_1	404.503	-136.91	7396.67	excitatory	0.409375	0.404888	1.916
2018_05_02_exp2_CAB	Scnn1a	Ai167	3	pyramidal	2	165	7447.56	TSeries_26_1	407.669	-140.645	7402.77	excitatory	0.36875	0.450034	1.0032
2018_05_02_exp2_CAB	Scnn1a	Ai167	3	pyramidal	2	165	7447.56	TSeries_66_2	425.094	-99.0134	7414.14	excitatory	0.346875	0.429585	6.3408
2018_05_02_exp2_CAB	Scnn1a	Ai167	2	pyramidal	2	163	7448.56	TSeries_226_1	357.031	-24.8504	7425.59	excitatory	0.834375	0.260712	1.26634
2018_05_01_exp2_TH	Scnn1a	Ai167	0	pyramidal	2	180	192.439	TSeries_33_1	389.351	-43.6405	146.559	excitatory	0.180288	0.640736	2.44763
2018_04_23_exp3_TH	Rorb	Ai167	1	pyramidal	2	220	-187.841	TSeries_770_3	646.982	126.531	-243.031	excitatory	1.03086	0.525719	1.19449
2018_04_23_exp3_TH	Rorb	Ai167	1	pyramidal	2	220	-187.841	TSeries_90_1	484.104	60.6825	-261.471	excitatory	0.0653592	1.46523	1.05587
2018_04_23_exp3_TH	Rorb	Ai167	1	pyramidal	2	220	-187.841	TSeries_570_2	581.526	103.029	-214.611	excitatory	0.634375	0.433429	0.958327
2018_04_23_exp3_TH	Rorb	Ai167	1	pyramidal	2	220	-187.841	TSeries_570_3	462.722	156.392	-214.611	excitatory	0.2	0.777882	1.75434
2018_04_23_exp3_TH	Rorb	Ai167	1	pyramidal	2	220	-187.841	TSeries_570_1	660.054	120.499	-214.611	excitatory	2.03125	0.189444	0.986613
2018_04_23_exp3_TH	Rorb	Ai167	1	pyramidal	2	220	-187.841	TSeries_870_3	756.586	89.9707	-218.411	excitatory	1.63125	0.318927	0.996312
2018_04_23_exp3_TH	Rorb	Ai167	1	pyramidal	2	220	-187.841	TSeries_870_2	678.587	73.0559	-218.411	excitatory	0.521875	0.612235	1.08347
2018_04_23_exp3_TH	Rorb	Ai167	1	pyramidal	2	220	-187.841	TSeries_230_1	478.825	105.328	-183.841	excitatory	0.112616	0.575555	1.95996
2018_04_23_exp3_TH	Rorb	Ai167	1	pyramidal	2	220	-187.841	TSeries_230_4	468.786	126.344	-183.841	excitatory	0.651563	0.277131	1.98945
2018_04_06_exp3_TH	Rorb	Ai167	1	pyramidal	2	250	6399.76	TSeries_2_2	318.496	32.6616	6423.31	excitatory	0.115594	0.882861	1.11406
2018_04_06_exp3_TH	Rorb	Ai167	1	pyramidal	2	250	6399.76	TSeries_632_2	356.459	-1.32409	6388.6	excitatory	0.432292	0.307298	0.981818
2018_04_06_exp1_TH	Rorb	Ai167	1	pyramidal	2	215	6321.99	TSeries_321_1	294.712	67.2704	6404.18	excitatory	0.370041	0.728112	1.36842
2018_02_28_exp1_TH	Scnn1a	Ai167	0	pyramidal	2	103	-158.837	TSeries_336_1	363.566	-16.111	-130.997	excitatory	0.0952446	1.22378	0.831834
2018_02_28_exp1_TH	Scnn1a	Ai167	0	pyramidal	2	103	-158.837	TSeries_436_1	376.086	11.1981	-164.597	excitatory	0.286337	0.61707	2.70163

## Sheet: Fig7B_exc_L23FSI_props
exp_id	presynapticCre	presynapticEffector	headstage	post_class	post_layer	postPia	post_z	MP_ID	prePia	x_ap	pre_z	cnx	peakOfAvg	CV	rise2080
2020_10_23_exp2_TH	Tlx3	ChrimsonR_kv_eyfp_AAV	1	interneuron	2	219	572.634	Point 18	437.682	35.4166	558.634	excitatory	0.101678	1.03508	1.25522
2020_08_21_exp1_TH	Penk	ChrimsonR_kv_eyfp_AAV	3	interneuron	2	133	67.844	Point 18	156.642	-39.2035	43.054	excitatory	2.68899	0.586059	1.18042
2020_08_21_exp1_TH	Penk	ChrimsonR_kv_eyfp_AAV	3	interneuron	2	133	67.844	Point 28	106.183	123.165	23.344	excitatory	0.0396443	2.04337	1.11292
2020_08_21_exp1_TH	Penk	ChrimsonR_kv_eyfp_AAV	3	interneuron	2	133	67.844	Point 21	114.658	3.68187	35.484	excitatory	3.89725	0.582894	0.811905
2020_08_21_exp1_TH	Penk	ChrimsonR_kv_eyfp_AAV	3	interneuron	2	133	67.844	Point 22	140.512	21.4324	35.484	excitatory	1.14586	0.794829	1.65099
2020_08_21_exp1_TH	Penk	ChrimsonR_kv_eyfp_AAV	3	interneuron	2	133	67.844	Point 25	161.586	20.3934	35.484	excitatory	0.323253	1.75702	0.593256
2020_08_21_exp1_TH	Penk	ChrimsonR_kv_eyfp_AAV	3	interneuron	2	133	67.844	Point 27	180.684	-8.35097	23.344	excitatory	1.39186	0.60601	0.761298
2020_07_03_exp2_TH	Rorb	ChrimsonR_kv_eyfp_AAV	1	interneuron	2	219	263.274	Point 12	371.241	-159.159	269.374	excitatory	0.244709	0.505276	1.29547
2020_07_03_exp2_TH	Rorb	ChrimsonR_kv_eyfp_AAV	1	interneuron	2	219	263.274	Point 24	383.083	-156.139	284.984	excitatory	0.225508	0.574818	1.49118
2020_06_11_exp2_TH	Rorb	Ai167	1	interneuron	2	240	252.874	Point 7	433.15	-32.5793	205.404	excitatory	1.72668	0.451868	1.17981
2020_06_11_exp2_TH	Rorb	Ai167	1	interneuron	2	240	252.874	Point 6	485.697	12.109	216.434	excitatory	0.204524	0.463532	2.61032
2020_06_11_exp2_TH	Rorb	Ai167	1	interneuron	2	240	252.874	Point 8	525.088	-72.9552	205.404	excitatory	0.364662	0.838267	1.24101
2020_05_28_exp2_TH	Rorb	ChrimsonR_kv_eyfp_AAV	1	interneuron	2	240	118.954	Point 14	367.489	15.753	123.244	excitatory	0.156006	2.16081	0.898729
2020_05_28_exp2_TH	Rorb	ChrimsonR_kv_eyfp_AAV	1	interneuron	2	240	118.954	Point 17	324.045	1.26685	114.444	excitatory	1.13616	0.269627	0.955053
2020_05_28_exp2_TH	Rorb	ChrimsonR_kv_eyfp_AAV	1	interneuron	2	240	118.954	Point 29	485.049	87.1525	96.194	excitatory	0.305312	0.803309	1.05471
2020_05_28_exp2_TH	Rorb	ChrimsonR_kv_eyfp_AAV	0	interneuron	2	235	107.274	Point 12	329.659	0.501164	123.244	excitatory	0.875349	0.417455	0.853676
2020_05_27_exp3_TH	Penk	ChrimsonR_kv_eyfp_AAV	0	interneuron	2	185	63.6512	Point 13	195.92	-86.8029	50.661	excitatory	0.4831	0.754659	1.04022
2020_05_27_exp3_TH	Penk	ChrimsonR_kv_eyfp_AAV	0	interneuron	2	185	63.6512	Point 12	268.746	42.2753	50.661	excitatory	0.666521	0.69365	1.02755
2020_05_27_exp3_TH	Penk	ChrimsonR_kv_eyfp_AAV	0	interneuron	2	185	63.6512	Point 17	236.703	1.01596	41.561	excitatory	0.0825916	0.793379	1.46485
2020_05_27_exp3_TH	Penk	ChrimsonR_kv_eyfp_AAV	0	interneuron	2	185	63.6512	Point 16	205.054	-4.13911	41.561	excitatory	1.23545	0.454524	1.32449
2020_05_27_exp3_TH	Penk	ChrimsonR_kv_eyfp_AAV	0	interneuron	2	185	63.6512	Point 5	198.924	-103.631	51.061	excitatory	0.142098	0.750228	3.7735
2020_05_27_exp3_TH	Penk	ChrimsonR_kv_eyfp_AAV	0	interneuron	2	185	63.6512	Point 6	232.715	-134.324	51.061	excitatory	0.806555	0.579325	1.8476
2020_05_27_exp3_TH	Penk	ChrimsonR_kv_eyfp_AAV	0	interneuron	2	185	63.6512	Point 9	205.947	-91.8689	51.061	excitatory	0.156263	0.958375	2.76754
2020_05_27_exp3_TH	Penk	ChrimsonR_kv_eyfp_AAV	0	interneuron	2	185	63.6512	Point 32	223.504	-2.17299	45.861	excitatory	0.133703	0.829815
2020_05_27_exp3_TH	Penk	ChrimsonR_kv_eyfp_AAV	0	interneuron	2	185	63.6512	Point 23	203.499	119.527	41.561	excitatory	0.13635	1.38611	0.755012
2020_05_26_exp2_TH	Penk	ChrimsonR_kv_eyfp_AAV	3	interneuron	2	171	0.950862	Point 19	160.822	-124.82	-0.129	excitatory	0.148229	1.27305	2.69973
2020_05_26_exp2_TH	Penk	ChrimsonR_kv_eyfp_AAV	3	interneuron	2	171	0.950862	Point 35	137.916	-14.361	-18.389	excitatory	1.33284	0.685875	1.65633
2020_05_26_exp2_TH	Penk	ChrimsonR_kv_eyfp_AAV	3	interneuron	2	171	0.950862	Point 34	109.976	-22.1314	-18.389	excitatory	2.34619	0.625103	1.92935
2020_05_26_exp2_TH	Penk	ChrimsonR_kv_eyfp_AAV	3	interneuron	2	171	0.950862	Point 32	122.372	16.5746	-18.389	excitatory	1.11425	0.728339	1.30528
2020_05_26_exp2_TH	Penk	ChrimsonR_kv_eyfp_AAV	3	interneuron	2	171	0.950862	Point 43	220.853	61.6017	-28.709	excitatory	0.252342	0.970062	1.46992
2020_05_26_exp2_TH	Penk	ChrimsonR_kv_eyfp_AAV	3	interneuron	2	171	0.950862	Point 46	108.515	33.0682	-38.199	excitatory	1.10493	0.545094	1.76026
2020_05_26_exp2_TH	Penk	ChrimsonR_kv_eyfp_AAV	3	interneuron	2	171	0.950862	Point 47	140.795	181.566	-38.199	excitatory	0.891767	0.811196	1.1656
2020_05_26_exp2_TH	Penk	ChrimsonR_kv_eyfp_AAV	3	interneuron	2	171	0.950862	Point 28	101.135	-109.525	-18.389	excitatory	0.492277	0.803592	1.45345
2020_05_26_exp2_TH	Penk	ChrimsonR_kv_eyfp_AAV	3	interneuron	2	171	0.950862	Point 29	154.359	-191.901	-18.389	excitatory	0.19283	1.76467	1.56833
2020_05_26_exp2_TH	Penk	ChrimsonR_kv_eyfp_AAV	3	interneuron	2	171	0.950862	Point 22	134.332	-29.9025	-0.129	excitatory	3.29159	0.604343	1.40425
2020_05_26_exp2_TH	Penk	ChrimsonR_kv_eyfp_AAV	3	interneuron	2	171	0.950862	Point 27	123.383	-28.0771	-3.349	excitatory	1.82777	0.731412	1.75876
2020_05_26_exp2_TH	Penk	ChrimsonR_kv_eyfp_AAV	3	interneuron	2	171	0.950862	Point 39	172.402	-5.25108	-29.339	excitatory	0.816928	1.04691	0.917081
2020_05_26_exp2_TH	Penk	ChrimsonR_kv_eyfp_AAV	3	interneuron	2	171	0.950862	Point 33	129.08	-115.095	-18.389	excitatory	0.931812	0.940903	1.4996
2019_08_09_exp3_TH	Tlx3	ChrimsonR_kv_eyfp_AAV	0	interneuron	2	198	327.106	Point 37	505.93	394.168	316.776	excitatory	0.696512	0.417448	0.663873
2019_08_09_exp2_TH	Tlx3	ChrimsonR_kv_eyfp_AAV	0	interneuron	2	207	207.586	Point 52	616.216	-239.007	231.226	excitatory	0.467156	0.919388	1.30281
2019_08_09_exp2_TH	Tlx3	ChrimsonR_kv_eyfp_AAV	0	interneuron	2	207	207.586	Point 14	671.342	-372.948	229.966	excitatory	0.462598	0.742108	0.606632
2019_05_29_exp2_TH	Rorb	ChrimsonR_kv_eyfp_AAV	0	interneuron	2	248	612.805	Point 11	479.268	127.362	584.195	excitatory	0.204569	0.803359	0.70073
2019_05_29_exp2_TH	Rorb	ChrimsonR_kv_eyfp_AAV	0	interneuron	2	248	612.805	Point 31	298.283	-9.70963	601.005	excitatory	0.350834	1.32997	0.869157
2019_05_29_exp2_TH	Rorb	ChrimsonR_kv_eyfp_AAV	0	interneuron	2	248	612.805	Point 32	263.333	92.2134	601.005	excitatory	0.411529	0.848689	0.956456
2019_05_29_exp2_TH	Rorb	ChrimsonR_kv_eyfp_AAV	0	interneuron	2	248	612.805	Point 21	596.285	74.8229	575.665	excitatory	0.447991	0.819351	1.39718
2019_03_20_exp1_TH	Rorb	ChrimsonR_kv_eyfp_AAV	1	interneuron	2	138	18.9249	Point 10	388.9	-40.0981	34.585	excitatory	0.396807	1.06946	1.3833
2019_03_20_exp1_TH	Rorb	ChrimsonR_kv_eyfp_AAV	1	interneuron	2	138	18.9249	Point 12	319.905	-0.248055	34.585	excitatory	0.620399	0.45851	1.63571
2019_03_20_exp1_TH	Rorb	ChrimsonR_kv_eyfp_AAV	1	interneuron	2	138	18.9249	Point 14	369.484	69.386	34.585	excitatory	0.60277	0.396913	1.47813
2019_03_20_exp1_TH	Rorb	ChrimsonR_kv_eyfp_AAV	1	interneuron	2	138	18.9249	Point 17	251.749	-12.4362	34.585	excitatory	0.338134	1.26893	1.06548
2019_03_20_exp1_TH	Rorb	ChrimsonR_kv_eyfp_AAV	1	interneuron	2	138	18.9249	Point 46	359.733	96.0766	27.295	excitatory	0.339226	0.909024	1.9344
2019_03_20_exp1_TH	Rorb	ChrimsonR_kv_eyfp_AAV	1	interneuron	2	138	18.9249	Point 45	396.858	-68.7786	27.295	excitatory	0.714188	0.480565	1.06329
2019_02_28_exp1_TH	Tlx3	ChrimsonR_kv_eyfp_AAV	1	interneuron	2	209	292.019	Point 12	622.149	37.0371	320.139	excitatory	0.158908	1.08077	1.56556
2019_02_28_exp1_TH	Tlx3	ChrimsonR_kv_eyfp_AAV	1	interneuron	2	209	292.019	Point 36	466.659	-22.69	301.389	excitatory	0.158877	0.578913	3.25018
2019_02_28_exp1_TH	Tlx3	ChrimsonR_kv_eyfp_AAV	1	interneuron	2	209	292.019	Point 21	622.63	49.8489	312.419	excitatory	0.742536	0.406454	0.481147
2019_02_28_exp1_TH	Tlx3	ChrimsonR_kv_eyfp_AAV	1	interneuron	2	209	292.019	Point 27	622.581	59.5855	312.419	excitatory	0.340466	0.884566	0.637363
2019_02_28_exp1_TH	Tlx3	ChrimsonR_kv_eyfp_AAV	1	interneuron	2	209	292.019	Point 33	494.345	126.941	314.899	excitatory	0.439667	0.678695	0.676768
2019_01_24_exp1_TH	Rorb	Ai167	0	interneuron	2	266	463.217	Point 5	385.654	88.8049	459.056	excitatory	0.632008	1.00307	0.743437
2019_01_24_exp1_TH	Rorb	Ai167	0	interneuron	2	266	463.217	Point 49	429.817	477.31	452.346	excitatory	0.731096	0.464883	0.786887
2019_01_24_exp1_TH	Rorb	Ai167	0	interneuron	2	266	463.217	Point 43	420.692	366.895	483.016	excitatory	0.040055	1.11182	1.27742
2018_11_30_exp2_TH	Rorb	Ai167	2	interneuron	2	185	743.596	Point 16	403.499	-45.7871	790.896	excitatory	1.10343	0.265433	0.607017
2018_11_30_exp2_TH	Rorb	Ai167	2	interneuron	2	185	743.596	Point 5	425.298	98.5449	748.496	excitatory	0.959597	0.393352	2.12316

## Sheet: Fig7B_inh_L23PC_props
exp_id	presynapticCre	presynapticEffector	headstage	post_class	post_layer	postPia	post_z	MP_ID	prePia	x_ap	pre_z	cnx	peakOfAvg	CV	rise2080
2020_11_06_exp3_TH	Sst	ChrimsonR_kv_eyfp_AAV	2	pyramidal	2	341	293.824	Point 6	486.384	-25.1744	281.714	inhibitory	-0.081368	1.33569	1.52564
2020_11_06_exp3_TH	Sst	ChrimsonR_kv_eyfp_AAV	2	pyramidal	2	341	293.824	Point 3	452.689	133.937	296.104	inhibitory	-0.0739399	1.51747	8.77481
2020_11_06_exp3_TH	Sst	ChrimsonR_kv_eyfp_AAV	2	pyramidal	2	341	293.824	Point 9	559.45	21.9603	272.324	inhibitory	-0.113129	1.06659	3.22536
2020_11_06_exp3_TH	Sst	ChrimsonR_kv_eyfp_AAV	2	pyramidal	2	341	293.824	Point 10	412.517	29.0361	242.254	inhibitory	-0.121017	0.908381	11.8643
2020_11_06_exp3_TH	Sst	ChrimsonR_kv_eyfp_AAV	2	pyramidal	2	341	293.824	Point 12	532.645	-42.1191	242.254	inhibitory	-0.0758739	1.27591	2.53527
2020_11_06_exp1_TH	Sst	ChrimsonR_kv_eyfp_AAV	2	pyramidal	2	166	457.404	Point 6	435.099	-80.5783	382.504	inhibitory	-0.0943548	1.02434	2.29526
2020_11_06_exp1_TH	Sst	ChrimsonR_kv_eyfp_AAV	2	pyramidal	2	166	457.404	Point 2	213.524	-0.713485	456.024	inhibitory	-0.0814344	0.822645	3.53205
2020_11_06_exp1_TH	Sst	ChrimsonR_kv_eyfp_AAV	2	pyramidal	2	166	457.404	Point 11	414.955	64.5075	404.434	inhibitory	-0.127617	0.647592	2.73993
2020_11_06_exp1_TH	Sst	ChrimsonR_kv_eyfp_AAV	2	pyramidal	2	166	457.404	Point 14	496.067	30.7123	384.954	inhibitory	-0.0501834	1.44447	1.91799
2020_11_05_exp4_TH	Sst	ChrimsonR_kv_eyfp_AAV	2	pyramidal	2	150	353.744	Point 1	267.995	101.69	396.714	inhibitory	-0.0881513	0.926171	1.74074
2020_11_05_exp4_TH	Sst	ChrimsonR_kv_eyfp_AAV	1	pyramidal	2	174	321.454	Point 5	447.804	68.9044	329.234	inhibitory	-0.0679203	0.713582	1.80084
2020_11_05_exp4_TH	Sst	ChrimsonR_kv_eyfp_AAV	1	pyramidal	2	174	321.454	Point 1	270.272	23.0302	396.714	inhibitory	-0.0507912	1.04467	3.62013
2020_11_05_exp4_TH	Sst	ChrimsonR_kv_eyfp_AAV	1	pyramidal	2	174	321.454	Point 2	347.902	-111.121	388.324	inhibitory	-0.0953075	0.976912	2.05087
2020_11_05_exp2_TH	Sst	ChrimsonR_kv_eyfp_AAV	2	pyramidal	2	147	325	Point 1	149.409	-34.4033	367.164	inhibitory	-0.0216678	1.38677	1.15041
2020_11_05_exp2_TH	Sst	ChrimsonR_kv_eyfp_AAV	2	pyramidal	2	147	325	Point 2	272.268	-7.81553	367.164	inhibitory	-0.262124	0.550018	4.11453
2020_11_05_exp2_TH	Sst	ChrimsonR_kv_eyfp_AAV	1	pyramidal	2	177	369	Point 2	271.336	-99.8977	367.164	inhibitory	-0.0676762	0.995959	1.96525
2020_11_05_exp1_TH	Sst	ChrimsonR_kv_eyfp_AAV	1	pyramidal	2	180	582.534	Point 4	339.772	95.2492	594.164	inhibitory	-0.394798	0.65329	4.43421
2020_11_05_exp1_TH	Sst	ChrimsonR_kv_eyfp_AAV	1	pyramidal	2	180	582.534	Point 3	275.041	-5.8633	566.204	inhibitory	-0.452979	1.25303	4.70243
2020_10_30_exp2_TH	Sst	ChrimsonR_kv_eyfp_AAV	2	pyramidal	2	170	420.154	Point 5	501.564	30.4152	471.264	inhibitory	-0.126566	0.918749	1.84085
2020_10_30_exp1_TH	Sst	ChrimsonR_kv_eyfp_AAV	1	pyramidal	2	327	373.424	Point 2	471.226	122.256	392.674	inhibitory	-0.0960222	0.79746	0.95891
2020_10_22_exp3_TH	Sst	ChrimsonR_kv_eyfp_AAV	2	pyramidal	2	112	344.994	Point 13	460.566	-235.37	343.054	inhibitory	-0.011925	1.16272	0.983108
2020_10_22_exp2_TH	Sst	ChrimsonR_kv_eyfp_AAV	1	pyramidal	2	177	365.145	Point 1	236.433	-96.8553	381.354	inhibitory	-0.0563484	1.19629	2.64831
2020_09_04_exp2_TH	Sst	ChrimsonR_kv_eyfp_AAV	3	pyramidal	2	196	-106.816	Point 15	434.741	143.786	-82.406	inhibitory	-0.124428	0.693456	6.28151
2020_09_04_exp2_TH	Sst	ChrimsonR_kv_eyfp_AAV	2	pyramidal	2	153	-123.386	Point 15	437.248	52.4243	-82.406	inhibitory	-0.0675382	0.886789	4.02339
2020_08_20_exp3_TH	Sst	ChrimsonR_kv_eyfp_AAV	3	pyramidal	2	235	-76.9459	Point 24	497.285	49.1636	-86.976	inhibitory	-0.129191	0.938599	2.37553
2020_08_20_exp3_TH	Sst	ChrimsonR_kv_eyfp_AAV	3	pyramidal	2	235	-76.9459	Point 25	409.537	20.2256	-94.456	inhibitory	-0.10738	0.861657	1.75884
2020_08_20_exp3_TH	Sst	ChrimsonR_kv_eyfp_AAV	2	pyramidal	2	163	-89.3958	Point 10	145.799	249.584	-99.106	inhibitory	-0.21424	0.461533	4.63493
2020_08_20_exp3_TH	Sst	ChrimsonR_kv_eyfp_AAV	2	pyramidal	2	163	-89.3958	Point 4	288.311	-72.3209	-123.326	inhibitory	-0.103433	0.97665	2.45865
2020_08_20_exp3_TH	Sst	ChrimsonR_kv_eyfp_AAV	2	pyramidal	2	163	-89.3958	Point 3	222.13	-56.8937	-63.436	inhibitory	-0.0557893	0.764321	2.25578
2020_08_20_exp3_TH	Sst	ChrimsonR_kv_eyfp_AAV	2	pyramidal	2	163	-89.3958	Point 25	404.715	109.105	-94.456	inhibitory	-0.0753891	0.954932	2.09442
2020_08_20_exp1_TH	Sst	ChrimsonR_kv_eyfp_AAV	2	pyramidal	2	216	-82.376	Point 1	342.599	-132.088	-80.766	inhibitory	-0.0628581	1.36985	2.09567
2020_08_13_exp1_TH	Sst	ChrimsonR_kv_eyfp_AAV	1	pyramidal	2	173	-38.336	Point 7	389.715	-90.0175	-18.996	inhibitory	-0.0786407	0.792687	2.52611
2020_08_13_exp1_TH	Sst	ChrimsonR_kv_eyfp_AAV	1	pyramidal	2	173	-38.336	Point 10	326.721	64.9067	-27.606	inhibitory	-0.463503	0.407762	2.95898
2020_08_02_exp3_TH	Sst	ChrimsonR_kv_eyfp_AAV	3	pyramidal	2	213	167.464	Point 2	248.181	67.1694	187.764	inhibitory	-0.0708362	0.631271	5.06504
2020_08_02_exp3_TH	Sst	ChrimsonR_kv_eyfp_AAV	3	pyramidal	2	213	167.464	Point 11	559.927	131.732	188.484	inhibitory	-0.111856	1.00469	9.82571
2020_08_02_exp3_TH	Sst	ChrimsonR_kv_eyfp_AAV	3	pyramidal	2	213	167.464	Point 12	534.416	30.0937	188.484	inhibitory	-0.116062	0.855015	5.81339
2020_08_02_exp2_TH	Sst	ChrimsonR_kv_eyfp_AAV	1	pyramidal	2	209	298.484	Point 6	248.427	16.86	301.354	inhibitory	-0.23234	0.691078	7.14344
2020_08_02_exp2_TH	Sst	ChrimsonR_kv_eyfp_AAV	1	pyramidal	2	209	298.484	Point 8	157.612	-31.638	297.364	inhibitory	-0.0331881	0.971442	4.5925
2020_08_02_exp1_TH	Sst	ChrimsonR_kv_eyfp_AAV	2	pyramidal	2	250	294.034	Point 4	335.79	170.016	319.424	inhibitory	-0.210032	0.573865	3.22405
2020_08_02_exp1_TH	Sst	ChrimsonR_kv_eyfp_AAV	2	pyramidal	2	250	294.034	Point 1	387.666	22.3641	322.024	inhibitory	-0.146388	0.760067	6.08654
2020_07_02_exp2_TH	Sst	ChrimsonR_kv_eyfp_AAV	1	pyramidal	2	242	322	Point 6	406.306	-34.276	361.604	inhibitory	-0.305891	0.551652	4.44292
2020_02_26_exp2_TH	Sst	ChrimsonR_kv_eyfp_AAV	1	pyramidal	2	216	-788.009	Point 11	303.069	-98.5817	-797.569	inhibitory	-0.285536	0.8159	8.74967
2020_02_26_exp2_TH	Sst	ChrimsonR_kv_eyfp_AAV	1	pyramidal	2	216	-788.009	Point 7	343.507	-136.597	-780.299	inhibitory	-0.127266	0.525919	2.34518
2020_02_26_exp2_TH	Sst	ChrimsonR_kv_eyfp_AAV	0	pyramidal	2	255	-781.979	Point 11	304.692	-180.36	-797.569	inhibitory	-0.0864137	0.813772	2.16274
2020_02_26_exp2_TH	Sst	ChrimsonR_kv_eyfp_AAV	0	pyramidal	2	255	-781.979	Point 12	329.754	24.1671	-797.569	inhibitory	-0.202944	0.844412	7.23357
2020_02_26_exp2_TH	Sst	ChrimsonR_kv_eyfp_AAV	0	pyramidal	2	255	-781.979	Point 7	345.13	-218.375	-780.299	inhibitory	-0.0899096	0.940881	4.92854
2020_02_25_exp1_TH	Sst	ChrimsonR_kv_eyfp_AAV	3	pyramidal	2	162	-897.169	Point 5	280.459	69.4962	-883.879	inhibitory	-0.0199703	0.601093	2.28437
2020_02_25_exp1_TH	Sst	ChrimsonR_kv_eyfp_AAV	3	pyramidal	2	162	-897.169	Point 6	378.775	69.462	-883.879	inhibitory	-0.136083	0.467255	3.22149
2020_02_25_exp1_TH	Sst	ChrimsonR_kv_eyfp_AAV	3	pyramidal	2	162	-897.169	Point 2	315.451	170.942	-873.319	inhibitory	-0.245438	0.391617	3.36038
2020_02_25_exp1_TH	Sst	ChrimsonR_kv_eyfp_AAV	3	pyramidal	2	162	-897.169	Point 8	254.47	109.571	-894.499	inhibitory	-0.109079	0.553614	2.41741
2020_02_25_exp1_TH	Sst	ChrimsonR_kv_eyfp_AAV	1	pyramidal	2	137	-905.819	Point 11	284.212	17.7663	-934.749	inhibitory	-0.154355	0.741284	4.06774
2020_02_25_exp1_TH	Sst	ChrimsonR_kv_eyfp_AAV	1	pyramidal	2	137	-905.819	Point 10	274.07	45.7019	-934.749	inhibitory	-0.20565	0.480474	5.377
2020_02_25_exp1_TH	Sst	ChrimsonR_kv_eyfp_AAV	1	pyramidal	2	137	-905.819	Point 36	346.601	77.386	-871.489	inhibitory	-0.242604	0.618431	5.22147
2020_02_25_exp1_TH	Sst	ChrimsonR_kv_eyfp_AAV	1	pyramidal	2	137	-905.819	Point 35	360.403	160.086	-871.489	inhibitory	-0.0966854	0.570548	3.24476
2020_02_25_exp1_TH	Sst	ChrimsonR_kv_eyfp_AAV	1	pyramidal	2	137	-905.819	Point 5	283.989	-129.797	-883.879	inhibitory	-0.129586	0.68923	4.59806
2020_02_25_exp1_TH	Sst	ChrimsonR_kv_eyfp_AAV	1	pyramidal	2	137	-905.819	Point 1	294.534	108.215	-873.319	inhibitory	-0.0740136	0.6636	3.22706
2020_02_25_exp1_TH	Sst	ChrimsonR_kv_eyfp_AAV	1	pyramidal	2	137	-905.819	Point 2	318.981	-28.352	-873.319	inhibitory	-0.252018	0.793298	5.84819
2020_02_25_exp1_TH	Sst	ChrimsonR_kv_eyfp_AAV	1	pyramidal	2	137	-905.819	Point 8	257.999	-89.7223	-894.499	inhibitory	-0.282416	0.396976	6.3873
2020_02_25_exp1_TH	Sst	ChrimsonR_kv_eyfp_AAV	1	pyramidal	2	137	-905.819	Point 39	472.229	94.2352	-860.819	inhibitory	-0.0803083	0.70317	6.09491
2020_01_31_exp2_TH	Sst	Ai167	1	pyramidal	2	239	-807.199	Point 3	276.383	-42.9108	-876.049	inhibitory	-0.183211	0.491173	3.97791
2020_01_31_exp2_TH	Sst	Ai167	1	pyramidal	2	239	-807.199	Point 2	272.299	-40.8984	-847.299	inhibitory	-0.0637458	0.628799	3.55441
2020_01_31_exp2_TH	Sst	Ai167	0	pyramidal	2	276	-786.041	Point 1	224.822	-22.2745	-830.629	inhibitory	-0.0566316	0.843765	2.83956
2019_05_23_exp2_TH	Sst	ChrimsonR_kv_eyfp_AAV	3	pyramidal	2	294	486.315	Point 11	500.08	109.408	486.655	inhibitory	-0.109312	1.42633	3.83176
2019_05_23_exp2_TH	Sst	ChrimsonR_kv_eyfp_AAV	3	pyramidal	2	294	486.315	Point 14	564.136	53.1947	482.235	inhibitory	-0.0997938	1.92652	2.01971
2019_05_23_exp2_TH	Sst	ChrimsonR_kv_eyfp_AAV	3	pyramidal	2	294	486.315	Point 17	535.201	133.668	482.235	inhibitory	-0.140697	1.316	6.02333
2019_05_23_exp2_TH	Sst	ChrimsonR_kv_eyfp_AAV	3	pyramidal	2	294	486.315	Point 16	539.467	-15.521	482.235	inhibitory	-0.11342	0.768703	2.03012
2019_05_23_exp2_TH	Sst	ChrimsonR_kv_eyfp_AAV	3	pyramidal	2	294	486.315	Point 1	473.746	168.192	527.235	inhibitory	-0.221277	0.829523	3.68924
2019_05_23_exp1_TH	Sst	ChrimsonR_kv_eyfp_AAV	3	pyramidal	2	244	580.105	Point 5	317.601	-24.3451	610.415	inhibitory	-0.302796	0.995395	4.5917
2019_05_23_exp1_TH	Sst	ChrimsonR_kv_eyfp_AAV	3	pyramidal	2	244	580.105	Point 4	245.4	-26.4767	617.725	inhibitory	-0.115148	1.40319	3.22824
2019_05_23_exp1_TH	Sst	ChrimsonR_kv_eyfp_AAV	3	pyramidal	2	244	580.105	Point 8	335.462	-39.3916	604.165	inhibitory	-0.241359	0.651739	2.99088
2019_05_17_exp1_TH	Sst	ChrimsonR_kv_eyfp_AAV	3	pyramidal	2	340	527.295	Point 10	292.513	-137.32	572.045	inhibitory	-0.176471	1.89767	19.4533
2019_05_17_exp1_TH	Sst	ChrimsonR_kv_eyfp_AAV	3	pyramidal	2	340	527.295	Point 22	438.345	2.64334	525.285	inhibitory	-0.232399	0.820121	2.56164
2019_05_17_exp1_TH	Sst	ChrimsonR_kv_eyfp_AAV	2	pyramidal	2	308	517.705	Point 16	461.126	-57.4503	562.075	inhibitory	-0.0895348	0.724566	2.91251
2019_05_17_exp1_TH	Sst	ChrimsonR_kv_eyfp_AAV	2	pyramidal	2	308	517.705	Point 6	318.867	78.1996	544.885	inhibitory	-0.158853	0.673431	4.77978
2019_05_17_exp1_TH	Sst	ChrimsonR_kv_eyfp_AAV	2	pyramidal	2	308	517.705	Point 9	401.988	43.0889	534.045	inhibitory	-0.153878	1.24831	6.02209
2019_05_17_exp1_TH	Sst	ChrimsonR_kv_eyfp_AAV	2	pyramidal	2	308	517.705	Point 22	425.839	78.2975	525.285	inhibitory	-0.0798369	1.09	4.08922
2019_05_17_exp1_TH	Sst	ChrimsonR_kv_eyfp_AAV	2	pyramidal	2	308	517.705	Point 26	406.584	30.6713	514.605	inhibitory	-0.0892482	0.915034	6.54731
2019_03_05_exp1_TH	Sst	ChrimsonR_kv_eyfp_AAV	0	pyramidal	2	196	275.979	Point 13	363.498	3.55457	284.459	inhibitory	-0.659285	0.285777	4.23554
2019_03_05_exp1_TH	Sst	ChrimsonR_kv_eyfp_AAV	0	pyramidal	2	196	275.979	Point 16	351.092	123.006	284.459	inhibitory	-0.182332	0.705053	5.86869
2019_03_05_exp1_TH	Sst	ChrimsonR_kv_eyfp_AAV	0	pyramidal	2	196	275.979	Point 18	332.586	-64.8513	258.419	inhibitory	-0.225297	0.713929	5.74507
2019_03_05_exp1_TH	Sst	ChrimsonR_kv_eyfp_AAV	0	pyramidal	2	196	275.979	Point 29	319.823	-156.373	311.549	inhibitory	-0.0674266	1.06562	6.47533
2019_03_05_exp1_TH	Sst	ChrimsonR_kv_eyfp_AAV	0	pyramidal	2	196	275.979	Point 20	390.887	-37.0587	246.279	inhibitory	-0.187311	0.616527	4.09306
2019_03_05_exp1_TH	Sst	ChrimsonR_kv_eyfp_AAV	0	pyramidal	2	196	275.979	Point 21	299.581	95.8572	246.279	inhibitory	-0.517562	0.471259	4.11709
2019_03_05_exp1_TH	Sst	ChrimsonR_kv_eyfp_AAV	0	pyramidal	2	196	275.979	Point 25	239.728	48.1966	305.439	inhibitory	-0.179512	0.643468	5.83915
2019_02_20_exp2_TH	Sst	ChrimsonR_kv_eyfp_AAV	3	pyramidal	2	293	600.5	Point 31	415.369	-93.6322	588.346	inhibitory	-0.157517	0.644973	1.54112
2019_02_20_exp2_TH	Sst	ChrimsonR_kv_eyfp_AAV	3	pyramidal	2	293	600.5	Point 6	229.118	-0.89167	515.026	inhibitory	-0.124767	1.02716	2.68265
2019_02_20_exp2_TH	Sst	ChrimsonR_kv_eyfp_AAV	3	pyramidal	2	293	600.5	Point 3	323.929	-32.6162	541.716	inhibitory	-0.393963	0.475615	4.22051
2019_02_20_exp2_TH	Sst	ChrimsonR_kv_eyfp_AAV	3	pyramidal	2	293	600.5	Point 2	290.765	16.3946	559.536	inhibitory	-0.167298	0.743984	4.08359
2019_02_20_exp2_TH	Sst	ChrimsonR_kv_eyfp_AAV	3	pyramidal	2	293	600.5	Point 29	499.776	147.432	544.106	inhibitory	-0.176257	0.71502	2.66909
2019_02_20_exp2_TH	Sst	ChrimsonR_kv_eyfp_AAV	2	pyramidal	2	215	559.5	Point 31	404.165	-48.7907	588.346	inhibitory	-0.21717	0.570715	3.00726
2019_02_20_exp2_TH	Sst	ChrimsonR_kv_eyfp_AAV	2	pyramidal	2	215	559.5	Point 5	249.479	-70.8359	515.026	inhibitory	-0.306765	0.662043	3.54728
2019_02_20_exp2_TH	Sst	ChrimsonR_kv_eyfp_AAV	2	pyramidal	2	215	559.5	Point 4	208.699	-109.433	515.026	inhibitory	-0.0937619	0.712446	4.27746
2019_02_20_exp2_TH	Sst	ChrimsonR_kv_eyfp_AAV	2	pyramidal	2	215	559.5	Point 6	217.914	43.9499	515.026	inhibitory	-0.147063	1.11687	2.57976
2019_02_20_exp2_TH	Sst	ChrimsonR_kv_eyfp_AAV	2	pyramidal	2	215	559.5	Point 3	312.725	12.2254	541.716	inhibitory	-0.914843	0.207669	2.88446
2019_02_20_exp2_TH	Sst	ChrimsonR_kv_eyfp_AAV	2	pyramidal	2	215	559.5	Point 2	279.561	61.2361	559.536	inhibitory	-0.191316	0.748053	3.70771
2019_02_20_exp2_TH	Sst	ChrimsonR_kv_eyfp_AAV	1	pyramidal	2	205	556.5	Point 5	232.505	-6.05219	515.026	inhibitory	-0.122349	0.300719	1.6859
2019_02_20_exp2_TH	Sst	ChrimsonR_kv_eyfp_AAV	1	pyramidal	2	205	556.5	Point 4	191.724	-44.6497	515.026	inhibitory	-0.0664521	0.644265	2.76473
2019_02_20_exp2_TH	Sst	ChrimsonR_kv_eyfp_AAV	1	pyramidal	2	205	556.5	Point 3	295.751	77.0091	541.716	inhibitory	-0.366276	0.352462	3.38695
2019_02_20_exp1_TH	Sst	ChrimsonR_kv_eyfp_AAV	2	pyramidal	2	261	677.986	Point 13	477.222	-109.329	738.396	inhibitory	-0.0845826	0.588149	1.15842
2019_02_20_exp1_TH	Sst	ChrimsonR_kv_eyfp_AAV	0	pyramidal	2	253	665.496	Point 13	496.933	6.93572	738.396	inhibitory	-0.182759	0.51225	2.55741
2019_02_20_exp1_TH	Sst	ChrimsonR_kv_eyfp_AAV	0	pyramidal	2	253	665.496	Point 4	251.602	66.9815	708.976	inhibitory	-0.391898	0.492742	3.13374
2019_02_20_exp1_TH	Sst	ChrimsonR_kv_eyfp_AAV	0	pyramidal	2	253	665.496	Point 1	251.818	29.2156	723.956	inhibitory	-0.101283	0.695203	2.18583
2019_02_07_exp1_TH	Sst	ChrimsonR_kv_eyfp_AAV	1	pyramidal	2	171	662.346	Point 4	167.81	137.996	643.826	inhibitory	-0.0874381	1.556	5.87713
2019_02_07_exp1_TH	Sst	ChrimsonR_kv_eyfp_AAV	1	pyramidal	2	171	662.346	Point 3	214.489	-123.975	642.386	inhibitory	-0.104764	0.825713	4.61162
2019_02_07_exp1_TH	Sst	ChrimsonR_kv_eyfp_AAV	1	pyramidal	2	171	662.346	Point 2	287.62	-24.5966	647.626	inhibitory	-0.090958	0.932514	1.39494
2019_02_07_exp1_TH	Sst	ChrimsonR_kv_eyfp_AAV	1	pyramidal	2	171	662.346	Point 28	257.942	-133.457	688.406	inhibitory	-0.0266564	0.974246	2.27831
2019_02_07_exp1_TH	Sst	ChrimsonR_kv_eyfp_AAV	1	pyramidal	2	171	662.346	Point 29	104.186	-191.71	632.136	inhibitory	-0.0663438	0.944682	5.70468
2018_12_19_exp2_TH	Sst	ChrimsonR_kv_eyfp_AAV	2	pyramidal	2	243	563.896	Point 24	412.342	-78.2478	597.546	inhibitory	-0.117846	0.797319	3.07098
2018_12_19_exp2_TH	Sst	ChrimsonR_kv_eyfp_AAV	2	pyramidal	2	243	563.896	Point 27	241.247	-127.257	570.176	inhibitory	-0.131785	0.622917	3.21701
2018_12_19_exp2_TH	Sst	ChrimsonR_kv_eyfp_AAV	0	pyramidal	2	161	603.396	Point 36	376.069	76.3991	600.516	inhibitory	-0.0767885	0.638468	4.99062
2018_12_19_exp2_TH	Sst	ChrimsonR_kv_eyfp_AAV	0	pyramidal	2	161	603.396	Point 42	412.565	70.2854	630.106	inhibitory	-0.365787	0.49858	3.95051
2018_12_19_exp2_TH	Sst	ChrimsonR_kv_eyfp_AAV	0	pyramidal	2	161	603.396	Point 22	194.069	48.0571	597.546	inhibitory	-0.0448797	0.83849	2.04802
2018_12_19_exp2_TH	Sst	ChrimsonR_kv_eyfp_AAV	0	pyramidal	2	161	603.396	Point 25	193.071	11.5609	570.176	inhibitory	-0.0577183	0.785302	1.60438
2018_12_19_exp1_TH	Sst	ChrimsonR_kv_eyfp_AAV	0	pyramidal	2	200	525.026	Point 4	201.34	-122.646	504.446	inhibitory	-0.0990166	0.785873	9.90631
2018_12_19_exp1_TH	Sst	ChrimsonR_kv_eyfp_AAV	0	pyramidal	2	200	525.026	Point 3	195.901	-40.1075	504.446	inhibitory	-0.102162	0.422413	3.38379
2018_12_19_exp1_TH	Sst	ChrimsonR_kv_eyfp_AAV	0	pyramidal	2	200	525.026	Point 11	290.02	7.8196	479.666	inhibitory	-0.132792	0.817196	9.93972
2018_12_13_exp1_TH	Sst	ChrimsonR_kv_eyfp_AAV	2	pyramidal	2	281	430.456	Point 11	424.926	-2.81096	420.166	inhibitory	-0.0421265	0.92861	1.9022
2018_12_13_exp1_TH	Sst	ChrimsonR_kv_eyfp_AAV	2	pyramidal	2	281	430.456	Point 7	629.126	6.29767	430.456	inhibitory	-0.0572734	0.818672	1.42478
2018_12_13_exp1_TH	Sst	ChrimsonR_kv_eyfp_AAV	2	pyramidal	2	281	430.456	Point 6	404.506	-60.4292	430.456	inhibitory	-0.0980117	0.808118	3.49161
2018_12_13_exp1_TH	Sst	ChrimsonR_kv_eyfp_AAV	2	pyramidal	2	281	430.456	Point 3	407.759	-68.7506	465.206	inhibitory	-0.0709529	0.906414	2.03695
2018_12_13_exp1_TH	Sst	ChrimsonR_kv_eyfp_AAV	0	pyramidal	2	179	405.356	Point 13	500.684	47.0736	420.166	inhibitory	-0.107205	0.536413	3.07108
2018_12_13_exp1_TH	Sst	ChrimsonR_kv_eyfp_AAV	0	pyramidal	2	179	405.356	Point 4	286.555	-129.999	455.586	inhibitory	-0.0496833	0.733464	3.09661
2018_12_13_exp1_TH	Sst	ChrimsonR_kv_eyfp_AAV	0	pyramidal	2	179	405.356	Point 6	414.286	29.9568	430.456	inhibitory	-0.0843378	0.810141	2.13695
2018_12_13_exp1_TH	Sst	ChrimsonR_kv_eyfp_AAV	0	pyramidal	2	179	405.356	Point 3	417.539	21.6354	465.206	inhibitory	-0.0426347	1.43533	1.52579
2018_12_13_exp1_TH	Sst	ChrimsonR_kv_eyfp_AAV	0	pyramidal	2	179	405.356	Point 2	270.3	-43.3028	470.936	inhibitory	-0.0988329	1.28581	6.22645
2018_12_13_exp1_TH	Sst	ChrimsonR_kv_eyfp_AAV	0	pyramidal	2	179	405.356	Point 28	419.656	-158.674	468.596	inhibitory	-0.0753709	1.63886	4.83615
2018_12_11_exp1_TH	Sst	ChrimsonR_kv_eyfp_AAV	2	pyramidal	2	302	430.456	Point 10	445.413	-45.5851	427.556	inhibitory	-0.0530389	0.925613	1.80133
2018_12_11_exp1_TH	Sst	ChrimsonR_kv_eyfp_AAV	2	pyramidal	2	302	430.456	Point 12	389.872	-86.7741	430.096	inhibitory	-0.0610831	0.82704	2.29597
2018_12_11_exp1_TH	Sst	ChrimsonR_kv_eyfp_AAV	2	pyramidal	2	302	430.456	Point 5	347.984	-59.178	443.326	inhibitory	-0.254365	0.556026	3.45219
2018_12_11_exp1_TH	Sst	ChrimsonR_kv_eyfp_AAV	2	pyramidal	2	302	430.456	Point 7	295.264	-7.53484	443.346	inhibitory	-0.111952	0.703022	2.34968
2018_12_11_exp1_TH	Sst	ChrimsonR_kv_eyfp_AAV	2	pyramidal	2	302	430.456	Point 6	449.696	28.4937	443.346	inhibitory	-0.207661	0.448474	4.66602
2018_12_11_exp1_TH	Sst	ChrimsonR_kv_eyfp_AAV	2	pyramidal	2	302	430.456	Point 3	373.972	76.5432	459.166	inhibitory	-0.109803	1.10437	3.23147
2018_12_11_exp1_TH	Sst	ChrimsonR_kv_eyfp_AAV	2	pyramidal	2	302	430.456	Point 2	346.171	-135.396	457.656	inhibitory	-0.0758258	0.639306	1.98012
2018_11_19_exp3_TH	Sst	Ai167	2	pyramidal	2	195	-677.796	TSeries_87_1	658.56	135.884	-623.146	inhibitory	-0.00859375	1.23771	1.05313
2018_11_19_exp1_TH	Sst	Ai167	1	pyramidal	2	184	-701.156	TSeries_28_1	133.234	62.8704	-690.446	inhibitory	-0.114062	0.844923	5.999
2018_11_19_exp1_TH	Sst	Ai167	1	pyramidal	2	184	-701.156	TSeries_128_1	268.132	-95.5049	-700.116	inhibitory	-0.342187	1.21608	2.0238
2018_11_15_exp3_TH	Sst	Ai167	3	pyramidal	2	224	-682.386	TSeries_67_1	184.73	-27.3604	-587.666	inhibitory	-0.266756	0.769713	3.20017
2018_11_15_exp2_TH	Sst	Ai167	3	pyramidal	2	308	-738.986	TSeries_73_1	455.593	157.835	-705.636	inhibitory	-0.313455	0.928832	2.31752
2018_11_13_exp2_TH	Sst	Ai167	1	pyramidal	2	168	-591.486	TSeries_33_1	263.452	47.6843	-584.076	inhibitory	-0.540625	0.331045	4.95352
2018_09_06_exp1_TH	Sst	Ai167	0	pyramidal	2	177	2162.18	TSeries_33_1	97.5781	165.799	2168.01	inhibitory	-0.146842	0.630196	2.65144
2018_09_05_exp1_LH	Sst	Ai167	1	pyramidal	2	206	696.855	TSeries_67_1	421.656	47.1408	745.385	inhibitory	-0.200132	0.756001	10.8416
2018_08_15_exp2_CAB	Sst	Ai167	2	pyramidal	2	197	-161.78	TSeries_547_1	550.519	-172.24	-251.78	inhibitory	-0.141141	0.958692	2.33063
2018_08_15_exp2_CAB	Sst	Ai167	2	pyramidal	2	197	-161.78	TSeries_187_1	252.906	-62.3493	-184.77	inhibitory	-0.053125	1.55052	2.11733
2018_08_15_exp1_CAB	Sst	Ai167	2	pyramidal	2	279	-234.25	TSeries_47_1	318.65	-2.43699	-187	inhibitory	-0.110937	1.28398	1.57579
2018_08_14_exp5_TH	Sst	Ai167	1	pyramidal	2	212	-442.26	TSeries_127_1	654.963	17.4636	-361.41	inhibitory	-0.131798	0.652576	2.51874
2018_08_14_exp5_TH	Sst	Ai167	1	pyramidal	2	212	-442.26	TSeries_27_1	215.986	-77.7762	-420.51	inhibitory	-0.202468	0.740206	9.9584
2018_08_14_exp2_TH	Sst	Ai167	1	pyramidal	2	169	-563.17	TSeries_49_1	207.628	10.3916	-546.02	inhibitory	-0.232812	0.663138	3.49364
2018_08_14_exp2_CAB	Sst	Ai167	2	pyramidal	2	202	-254.29	TSeries_27_1	272.386	7.63105	-263.52	inhibitory	-0.217187	0.848959	1.78923
2018_08_14_exp1_TH	Sst	Ai167	0	pyramidal	2	146	-580.89	TSeries_27_1	165.795	-23.41	-558.8	inhibitory	-0.346875	0.323923	5.85733
2018_08_14_exp1_CAB	Sst	Ai167	1	pyramidal	2	79	-242.71	TSeries_446_1	100.397	-4.22975	-166.16	inhibitory	-0.12692	0.598168	6.66358
2018_07_31_exp3_TH	Sst	Ai167	1	pyramidal	2	197	828.596	TSeries_28_1	247.579	62.3591	833.866	inhibitory	-0.0940132	1.09515	4.40618
2018_07_31_exp2_TH	Sst	Ai167	1	pyramidal	2	176	748.096	TSeries_28_1	203.845	-114.041	779.486	inhibitory	-0.0541626	2.43602	9.76474
2018_07_31_exp2_TH	Sst	Ai167	1	pyramidal	2	176	748.096	TSeries_108_1	224.586	60.6401	751.296	inhibitory	-0.199093	0.769113	7.23999
2018_07_31_exp1_TH	Sst	Ai167	1	pyramidal	2	220	850.826	TSeries_28_1	283.29	33.5444	857.766	inhibitory	-0.409834	0.67784	6.82703
2018_07_31_exp1_TH	Sst	Ai167	1	pyramidal	2	220	850.826	TSeries_149_1	242.581	-73.2941	794.106	inhibitory	-0.087724	1.73332	7.05081
2018_07_31_exp1_TH	Sst	Ai167	1	pyramidal	2	220	850.826	TSeries_68_1	276.28	-21.8144	873.166	inhibitory	-0.20708	1.608	9.20578
2018_07_30_exp3_TH	Sst	Ai167	1	pyramidal	2	210	453.756	TSeries_27_2	218.294	-0.244007	476.266	inhibitory	-0.44695	0.413335	4.32512
2018_07_30_exp3_TH	Sst	Ai167	1	pyramidal	2	210	453.756	TSeries_27_1	197.293	-80.596	476.266	inhibitory	-0.0818204	1.2648	3.8387
2018_07_30_exp2_TH	Sst	Ai167	1	pyramidal	2	254	846.496	TSeries_110_1	224.763	-0.981179	839.006	inhibitory	-0.279687	0.449062	5.84172
2018_07_24_exp3_TH	Sst	Ai167	0	pyramidal	2	231	751.736	TSeries_107_1	304.028	-12.1334	806.066	inhibitory	-0.096875	0.853526	3.21429
2018_07_24_exp2_TH	Sst	Ai167	0	pyramidal	2	191	673.296	TSeries_107_1	172.123	-85.7136	722.766	inhibitory	-0.26999	0.561114	2.90807
2018_07_24_exp1_TH	Sst	Ai167	0	pyramidal	2	171	669.016	TSeries_0_1	142.516	-183.676	708.656	inhibitory	-0.0473958	1.12397	2.51076
2020_11_20_exp1_TH	Pvalb	ChrimsonR_kv_eyfp_AAV	2	pyramidal	2	139	568.334	Point 6	347.374	3.06593	568.904	inhibitory	-0.55233	0.253146	1.5744
2020_11_20_exp1_TH	Pvalb	ChrimsonR_kv_eyfp_AAV	2	pyramidal	2	139	568.334	Point 2	308.685	47.6754	579.714	inhibitory	-0.332154	0.360562	1.37214
2020_11_19_exp1_TH	Pvalb	ChrimsonR_kv_eyfp_AAV	3	pyramidal	2	244	353.494	Point 6	329.751	-33.4308	338.564	inhibitory	-1.20968	0.283354	2.49032
2020_09_03_exp2_TH	Pvalb	ChrimsonR_kv_eyfp_AAV	0	pyramidal	2	90	-83.8759	Point 4	194.205	-76.1814	-117.346	inhibitory	-0.102954	0.917194	2.47867
2020_09_03_exp2_TH	Pvalb	ChrimsonR_kv_eyfp_AAV	0	pyramidal	2	90	-83.8759	Point 1	84.4096	-10.794	-79.746	inhibitory	-1.97154	0.20045	3.77862
2020_09_03_exp2_TH	Pvalb	ChrimsonR_kv_eyfp_AAV	0	pyramidal	2	90	-83.8759	Point 3	100.422	-131.115	-90.906	inhibitory	-0.0665569	1.32359	3.80444
2020_07_26_exp3_TH	Pvalb	ChrimsonR_kv_eyfp_AAV	1	pyramidal	2	180	284.564	Point 5	254.982	9.52461	331.444	inhibitory	-0.0424876	0.989239	0.974711
2020_07_26_exp3_TH	Pvalb	ChrimsonR_kv_eyfp_AAV	1	pyramidal	2	180	284.564	Point 7	312.15	66.686	331.444	inhibitory	-0.116352	0.61166	1.77708
2020_07_26_exp3_TH	Pvalb	ChrimsonR_kv_eyfp_AAV	1	pyramidal	2	180	284.564	Point 6	384.381	35.618	331.444	inhibitory	-0.0398738	0.808856	1.49406
2020_07_26_exp3_TH	Pvalb	ChrimsonR_kv_eyfp_AAV	1	pyramidal	2	180	284.564	Point 3	425.474	68.5325	342.244	inhibitory	-0.266422	0.460807	1.87864
2020_07_26_exp2_TH	Pvalb	ChrimsonR_kv_eyfp_AAV	0	pyramidal	2	192	316.664	Point 3	283.803	-189.194	330.964	inhibitory	-0.366174	0.678628	3.18152
2020_07_26_exp2_TH	Pvalb	ChrimsonR_kv_eyfp_AAV	0	pyramidal	2	192	316.664	Point 2	249.259	-19.2316	271.444	inhibitory	-0.624981	0.495622	2.86764
2020_07_26_exp1_TH	Pvalb	ChrimsonR_kv_eyfp_AAV	2	pyramidal	2	134	279.494	Point 7	157.305	-14.562	225.834	inhibitory	-0.0882274	0.779443	3.45268
2020_07_26_exp1_TH	Pvalb	ChrimsonR_kv_eyfp_AAV	1	pyramidal	2	178	284.544	Point 7	158.95	10.114	225.834	inhibitory	-0.537864	0.419093	3.42577
2020_07_26_exp1_TH	Pvalb	ChrimsonR_kv_eyfp_AAV	1	pyramidal	2	178	284.544	Point 8	399.96	-18.8278	302.174	inhibitory	-0.0456735	1.12	1.46789
2020_07_24_exp2_TH	Pvalb	ChrimsonR_kv_eyfp_AAV	1	pyramidal	2	228	238.514	Point 3	537.017	-70.7895	224.414	inhibitory	-0.0670541	0.846266	1.13347
2020_07_24_exp2_TH	Pvalb	ChrimsonR_kv_eyfp_AAV	1	pyramidal	2	228	238.514	Point 25	614.155	-123.062	286.734	inhibitory	-0.0374086	0.475771	2.62574
2020_07_24_exp1_TH	Pvalb	ChrimsonR_kv_eyfp_AAV	2	pyramidal	2	229	186.594	Point 1	384.225	-55.2423	188.924	inhibitory	-0.877874	0.225584	2.55465
2020_07_24_exp1_TH	Pvalb	ChrimsonR_kv_eyfp_AAV	1	pyramidal	2	204	186.124	Point 1	388.154	-20.885	188.924	inhibitory	-0.242469	0.493585	2.17857
2020_07_24_exp1_TH	Pvalb	ChrimsonR_kv_eyfp_AAV	1	pyramidal	2	204	186.124	Point 2	186.882	7.26846	188.924	inhibitory	-0.2734	0.503882	4.13987
2020_07_23_exp2_TH	Pvalb	ChrimsonR_kv_eyfp_AAV	3	pyramidal	2	287	326	Point 4	416.186	31.4591	346.624	inhibitory	-0.351291	0.427593	1.36212
2020_07_23_exp1_TH	Pvalb	ChrimsonR_kv_eyfp_AAV	3	pyramidal	2	173	151	Point 10	297.056	-200.482	185.294	inhibitory	-1.0419	0.248581	2.02051
2020_07_23_exp1_TH	Pvalb	ChrimsonR_kv_eyfp_AAV	3	pyramidal	2	173	151	Point 15	340.737	-57.1361	205.004	inhibitory	-0.283069	0.518637	2.66729
2020_07_23_exp1_TH	Pvalb	ChrimsonR_kv_eyfp_AAV	3	pyramidal	2	173	151	Point 18	340.94	8.37186	212.014	inhibitory	-0.333506	0.318215	1.33864
2020_07_23_exp1_TH	Pvalb	ChrimsonR_kv_eyfp_AAV	3	pyramidal	2	173	151	Point 5	369.151	-31.2587	123.024	inhibitory	-0.340168	0.767739	3.06324
2020_07_23_exp1_TH	Pvalb	ChrimsonR_kv_eyfp_AAV	1	pyramidal	2	148	181	Point 10	300.777	100.219	185.294	inhibitory	-0.105926	1.18712	3.85313
2020_07_23_exp1_TH	Pvalb	ChrimsonR_kv_eyfp_AAV	1	pyramidal	2	148	181	Point 14	449.7	226.403	205.004	inhibitory	-0.103582	0.739698	5.25121
2020_07_23_exp1_TH	Pvalb	ChrimsonR_kv_eyfp_AAV	1	pyramidal	2	148	181	Point 27	475.154	47.6904	249.134	inhibitory	-0.165222	0.796988	1.15944
2020_07_19_exp2_TH	Pvalb	ChrimsonR_kv_eyfp_AAV	0	pyramidal	2	271	392.044	Point 10	417.467	-42.6304	368.554	inhibitory	-0.628005	0.50731	1.33079
2020_07_19_exp2_TH	Pvalb	ChrimsonR_kv_eyfp_AAV	0	pyramidal	2	271	392.044	Point 7	389.347	100.847	384.914	inhibitory	-0.331114	0.576247	2.43424
2020_07_19_exp1_TH	Pvalb	ChrimsonR_kv_eyfp_AAV	2	pyramidal	2	184	243.294	Point 11	262.511	-113.076	289.144	inhibitory	-0.031189	0.603038	1.37547
2020_07_19_exp1_TH	Pvalb	ChrimsonR_kv_eyfp_AAV	2	pyramidal	2	184	243.294	Point 10	279.843	-142.724	289.144	inhibitory	-0.10996	1.00186	4.31727
2020_07_19_exp1_TH	Pvalb	ChrimsonR_kv_eyfp_AAV	2	pyramidal	2	184	243.294	Point 12	289.893	11.2358	289.144	inhibitory	-0.359971	0.442712	2.43478
2020_07_19_exp1_TH	Pvalb	ChrimsonR_kv_eyfp_AAV	2	pyramidal	2	184	243.294	Point 4	236.284	-109.537	224.064	inhibitory	-0.206741	0.801102	5.02498
2020_07_19_exp1_TH	Pvalb	ChrimsonR_kv_eyfp_AAV	2	pyramidal	2	184	243.294	Point 1	181.998	-102.483	267.824	inhibitory	-0.46317	0.369647	5.76793
2020_07_19_exp1_TH	Pvalb	ChrimsonR_kv_eyfp_AAV	2	pyramidal	2	184	243.294	Point 3	311.175	-37.1469	267.834	inhibitory	-0.273357	0.302715	1.51687
2020_07_19_exp1_TH	Pvalb	ChrimsonR_kv_eyfp_AAV	2	pyramidal	2	184	243.294	Point 40	214.961	-52.488	290.784	inhibitory	-0.516207	0.369909	2.05027
2020_07_19_exp1_TH	Pvalb	ChrimsonR_kv_eyfp_AAV	2	pyramidal	2	184	243.294	Point 38	349.03	-49.3518	324.214	inhibitory	-0.115814	0.554159	2.94136
2020_07_17_exp4_TH	Pvalb	ChrimsonR_kv_eyfp_AAV	3	pyramidal	2	251	223.264	Point 5	392.545	1.9339	273.434	inhibitory	-0.118495	0.349773	2.4454
2020_07_17_exp4_TH	Pvalb	ChrimsonR_kv_eyfp_AAV	3	pyramidal	2	251	223.264	Point 4	423.673	-37.2922	283.204	inhibitory	-0.138535	0.462407	1.98208
2020_07_17_exp4_TH	Pvalb	ChrimsonR_kv_eyfp_AAV	3	pyramidal	2	251	223.264	Point 3	358.018	-26.1963	248.034	inhibitory	-0.273958	0.397924	2.94089
2020_07_17_exp4_TH	Pvalb	ChrimsonR_kv_eyfp_AAV	2	pyramidal	2	205	246.524	Point 5	392.44	20.3331	273.434	inhibitory	-0.224746	0.517686	8.37953
2020_07_17_exp4_TH	Pvalb	ChrimsonR_kv_eyfp_AAV	2	pyramidal	2	205	246.524	Point 4	423.567	-18.893	283.204	inhibitory	-0.102663	0.922308	3.14703
2020_07_17_exp4_TH	Pvalb	ChrimsonR_kv_eyfp_AAV	2	pyramidal	2	205	246.524	Point 3	357.913	-7.79717	248.034	inhibitory	-0.344324	0.376598	2.96558
2020_07_17_exp4_TH	Pvalb	ChrimsonR_kv_eyfp_AAV	1	pyramidal	2	232	269.524	Point 10	375.407	-143.799	254.044	inhibitory	-0.341764	0.391185	1.57264
2020_07_17_exp4_TH	Pvalb	ChrimsonR_kv_eyfp_AAV	1	pyramidal	2	232	269.524	Point 5	399.671	81.1935	273.434	inhibitory	-0.276572	0.517097	14.1867
2020_07_17_exp4_TH	Pvalb	ChrimsonR_kv_eyfp_AAV	1	pyramidal	2	232	269.524	Point 4	430.798	41.9674	283.204	inhibitory	-0.885648	0.211848	1.73383
2020_07_17_exp4_TH	Pvalb	ChrimsonR_kv_eyfp_AAV	1	pyramidal	2	232	269.524	Point 3	365.144	53.0633	248.034	inhibitory	-0.431668	0.461539	2.5887
2020_07_17_exp4_TH	Pvalb	ChrimsonR_kv_eyfp_AAV	0	pyramidal	2	284	227.054	Point 10	371.647	28.9566	254.044	inhibitory	-1.52768	0.197261	2.37881
2020_07_17_exp2_TH	Pvalb	ChrimsonR_kv_eyfp_AAV	3	pyramidal	2	160	326.524	Point 1	222.835	-70.2279	357.124	inhibitory	-0.393175	0.989377	2.50123
2020_07_17_exp1_TH	Pvalb	ChrimsonR_kv_eyfp_AAV	3	pyramidal	2	142	197.314	Point 13	311.19	35.8079	172.344	inhibitory	-0.0617852	0.806139	4.20423
2020_07_17_exp1_TH	Pvalb	ChrimsonR_kv_eyfp_AAV	3	pyramidal	2	142	197.314	Point 12	117.853	-181.657	172.344	inhibitory	-0.17599	0.539945	3.55923
2020_07_17_exp1_TH	Pvalb	ChrimsonR_kv_eyfp_AAV	3	pyramidal	2	142	197.314	Point 8	331.418	-27.184	206.754	inhibitory	-1.35244	0.201211	2.59901
2020_07_17_exp1_TH	Pvalb	ChrimsonR_kv_eyfp_AAV	1	pyramidal	2	176	208.244	Point 7	212.398	11.7969	206.754	inhibitory	-0.13984	0.864791	1.0922
2020_07_17_exp1_TH	Pvalb	ChrimsonR_kv_eyfp_AAV	1	pyramidal	2	176	208.244	Point 8	332.752	53.1759	206.754	inhibitory	-0.828781	0.165471	1.96346
2020_07_17_exp1_TH	Pvalb	ChrimsonR_kv_eyfp_AAV	1	pyramidal	2	176	208.244	Point 33	415.198	60.9348	183.124	inhibitory	-0.0944294	0.503323	4.78385
2020_07_17_exp1_TH	Pvalb	ChrimsonR_kv_eyfp_AAV	0	pyramidal	2	178	206.174	Point 10	337.29	104.517	187.054	inhibitory	-0.211947	0.435484	2.06237
2020_07_17_exp1_TH	Pvalb	ChrimsonR_kv_eyfp_AAV	0	pyramidal	2	178	206.174	Point 6	214.549	-28.2672	206.754	inhibitory	-1.45019	0.191897	2.54913
2020_07_17_exp1_TH	Pvalb	ChrimsonR_kv_eyfp_AAV	0	pyramidal	2	178	206.174	Point 3	261.68	-41.0863	214.424	inhibitory	-0.185738	0.376903	1.69035
2020_05_20_exp1_TH	Pvalb	ChrimsonR_kv_eyfp_AAV	3	pyramidal	2	93	176.341	Point 11	183.734	10.3726	107.011	inhibitory	-0.272244	0.57725	1.92075
2020_05_20_exp1_TH	Pvalb	ChrimsonR_kv_eyfp_AAV	3	pyramidal	2	93	176.341	Point 4	347.684	-10.5859	117.021	inhibitory	-0.731386	0.487393	3.91933
2020_05_20_exp1_TH	Pvalb	ChrimsonR_kv_eyfp_AAV	3	pyramidal	2	93	176.341	Point 6	180.298	16.2558	111.101	inhibitory	-0.0619072	1.62121	5.26434
2020_05_20_exp1_TH	Pvalb	ChrimsonR_kv_eyfp_AAV	3	pyramidal	2	93	176.341	Point 2	134.299	-55.79	117.021	inhibitory	-1.95396	0.505222	7.42233
2020_05_20_exp1_TH	Pvalb	ChrimsonR_kv_eyfp_AAV	3	pyramidal	2	93	176.341	Point 28	289.069	-248.293	132.781	inhibitory	-0.571014	0.372219	2.4705
2020_05_20_exp1_TH	Pvalb	ChrimsonR_kv_eyfp_AAV	1	pyramidal	2	177	107.751	Point 4	341.234	148.126	117.021	inhibitory	-0.158452	0.927666	2.66584
2020_05_20_exp1_TH	Pvalb	ChrimsonR_kv_eyfp_AAV	1	pyramidal	2	177	107.751	Point 2	127.848	102.922	117.021	inhibitory	-0.802445	0.559165	4.57277
2020_05_20_exp1_TH	Pvalb	ChrimsonR_kv_eyfp_AAV	0	pyramidal	2	178	103.221	Point 6	162.73	248.873	111.101	inhibitory	-0.0761625	0.854015	2.44108
2020_05_20_exp1_TH	Pvalb	ChrimsonR_kv_eyfp_AAV	0	pyramidal	2	178	103.221	Point 2	116.731	176.827	117.021	inhibitory	-0.424254	0.698182	5.67441
2020_05_20_exp1_TH	Pvalb	ChrimsonR_kv_eyfp_AAV	0	pyramidal	2	178	103.221	Point 28	271.502	-15.6762	132.781	inhibitory	-0.140642	0.717743	2.30109
2020_03_23_exp2_TH	Pvalb	ChrimsonR_kv_eyfp_AAV	1	pyramidal	2	185	61.3	Point 7	229.484	-40.8193	98.961	inhibitory	-0.150659	0.715867	1.79281
2020_03_23_exp1_TH	Pvalb	ChrimsonR_kv_eyfp_AAV	3	pyramidal	2	177	92	Point 14	384.787	79.3762	93.691	inhibitory	-0.247451	0.526574	2.75839
2020_03_23_exp1_TH	Pvalb	ChrimsonR_kv_eyfp_AAV	3	pyramidal	2	177	92	Point 19	331.002	-35.0073	84.171	inhibitory	-0.0728263	0.700072	3.96537
2020_03_23_exp1_TH	Pvalb	ChrimsonR_kv_eyfp_AAV	3	pyramidal	2	177	92	Point 8	412.856	158.731	112.461	inhibitory	-0.0966394	0.647964	2.45332
2020_03_23_exp1_TH	Pvalb	ChrimsonR_kv_eyfp_AAV	0	pyramidal	2	170	111.651	Point 1	210.459	58.2936	97.631	inhibitory	-0.366762	0.467309	2.32141
2020_03_23_exp1_TH	Pvalb	ChrimsonR_kv_eyfp_AAV	0	pyramidal	2	170	111.651	Point 3	205.197	-38.679	80.991	inhibitory	-1.72207	0.127667	2.71474
2020_03_23_exp1_TH	Pvalb	ChrimsonR_kv_eyfp_AAV	0	pyramidal	2	170	111.651	Point 2	341.52	5.38281	97.631	inhibitory	-0.0827231	1.26897	1.86736
2020_03_23_exp1_TH	Pvalb	ChrimsonR_kv_eyfp_AAV	0	pyramidal	2	170	111.651	Point 8	418.024	-32.8931	112.461	inhibitory	-0.201014	0.605937	3.07902

## Sheet: Fig7B_inh_L23FSI_props
exp_id	presynapticCre	presynapticEffector	headstage	post_class	post_layer	postPia	post_z	MP_ID	prePia	x_ap	pre_z	cnx	peakOfAvg	CV	rise2080
2020_10_22_exp1_TH	Sst	ChrimsonR_kv_eyfp_AAV	1	interneuron	2	159	344.894	Point 6	304.225	-17.8684	328.774	inhibitory	-0.374273	0.436289	1.7392
2020_10_22_exp1_TH	Sst	ChrimsonR_kv_eyfp_AAV	1	interneuron	2	159	344.894	Point 3	250.123	30.6849	328.774	inhibitory	-0.124722	0.954068	4.71204
2020_09_04_exp2_TH	Sst	ChrimsonR_kv_eyfp_AAV	0	interneuron	2	206	-101.866	Point 13	472.624	-146.199	-72.836	inhibitory	-0.069071	1.42909	2.59003
2020_02_26_exp2_TH	Sst	ChrimsonR_kv_eyfp_AAV	3	interneuron	2	285	-777.449	Point 11	305.688	189.604	-797.569	inhibitory	-0.162478	0.73158	2.62316
2020_02_26_exp2_TH	Sst	ChrimsonR_kv_eyfp_AAV	3	interneuron	2	285	-777.449	Point 14	440.867	-0.0645469	-766.939	inhibitory	-1.65978	0.196541	2.27266
2020_02_26_exp2_TH	Sst	ChrimsonR_kv_eyfp_AAV	3	interneuron	2	285	-777.449	Point 30	275.456	-186.793	-795.109	inhibitory	-0.215949	0.739342	2.10895
2020_02_26_exp2_TH	Sst	ChrimsonR_kv_eyfp_AAV	3	interneuron	2	285	-777.449	Point 46	330.313	3.57011	-853.559	inhibitory	-0.256114	0.434477	2.81695
2020_02_26_exp2_TH	Sst	ChrimsonR_kv_eyfp_AAV	3	interneuron	2	285	-777.449	Point 47	377.814	99.3719	-853.559	inhibitory	-0.228082	0.728314	2.67851
2020_02_26_exp2_TH	Sst	ChrimsonR_kv_eyfp_AAV	3	interneuron	2	285	-777.449	Point 20	270.872	34.2145	-776.269	inhibitory	-0.177475	0.718895	2.11707
2020_02_26_exp1_TH	Sst	ChrimsonR_kv_eyfp_AAV	0	interneuron	2	188	-824.839	Point 7	464.048	-82.1403	-875.169	inhibitory	-0.10155	1.40732	6.30252
2020_02_26_exp1_TH	Sst	ChrimsonR_kv_eyfp_AAV	0	interneuron	2	188	-824.839	Point 3	237.393	-95.136	-837.149	inhibitory	-0.129868	0.830506	3.80227
2020_02_26_exp1_TH	Sst	ChrimsonR_kv_eyfp_AAV	0	interneuron	2	188	-824.839	Point 12	514.11	-7.08586	-861.099	inhibitory	-0.115503	0.739467	1.87463
2020_02_26_exp1_TH	Sst	ChrimsonR_kv_eyfp_AAV	0	interneuron	2	188	-824.839	Point 15	450.786	20.8989	-852.439	inhibitory	-0.148234	1.00653	1.24346
2019_02_13_exp1_TH	Sst	ChrimsonR_kv_eyfp_AAV	3	interneuron	2	287	596.206	Point 11	465.009	-79.3823	593.576	inhibitory	-0.361168	0.689361	1.85562
2019_02_13_exp1_TH	Sst	ChrimsonR_kv_eyfp_AAV	3	interneuron	2	287	596.206	Point 17	471.414	106.303	629.046	inhibitory	-0.141441	0.824832	3.08563
2019_02_13_exp1_TH	Sst	ChrimsonR_kv_eyfp_AAV	3	interneuron	2	287	596.206	Point 7	508.623	-62.8785	602.436	inhibitory	-0.275805	0.498825	3.68171
2019_02_13_exp1_TH	Sst	ChrimsonR_kv_eyfp_AAV	3	interneuron	2	287	596.206	Point 2	406.996	-11.0801	616.456	inhibitory	-1.33083	0.291406	1.91506
2018_11_15_exp2_TH	Sst	Ai167	1	interneuron	2	210	-698.986	TSeries_73_1	462.726	-3.31953	-705.636	inhibitory	-0.211486	0.86121	1.65182
2020_11_20_exp1_TH	Pvalb	ChrimsonR_kv_eyfp_AAV	3	interneuron	2	285	598.144	Point 17	505.252	138.677	633.554	inhibitory	-0.205382	0.459838	1.34824
2020_11_20_exp1_TH	Pvalb	ChrimsonR_kv_eyfp_AAV	3	interneuron	2	285	598.144	Point 6	348.43	-50.274	568.904	inhibitory	-0.318955	0.600763	1.5028
2020_11_20_exp1_TH	Pvalb	ChrimsonR_kv_eyfp_AAV	3	interneuron	2	285	598.144	Point 3	316.69	-133.066	593.854	inhibitory	-0.155493	0.474821	1.22965
2020_11_20_exp1_TH	Pvalb	ChrimsonR_kv_eyfp_AAV	3	interneuron	2	285	598.144	Point 8	360.654	109.004	567.024	inhibitory	-0.299355	0.449862	1.3076
2020_09_03_exp2_TH	Pvalb	ChrimsonR_kv_eyfp_AAV	3	interneuron	2	70	-84.186	Point 4	195.214	220.571	-117.346	inhibitory	-0.111113	0.979961	3.36975
2020_09_03_exp2_TH	Pvalb	ChrimsonR_kv_eyfp_AAV	3	interneuron	2	70	-84.186	Point 1	85.4188	285.958	-79.746	inhibitory	-0.374693	0.362495	2.07912
2020_09_03_exp2_TH	Pvalb	ChrimsonR_kv_eyfp_AAV	3	interneuron	2	70	-84.186	Point 3	101.432	165.638	-90.906	inhibitory	-0.407685	0.468501	2.16958
2020_09_03_exp2_TH	Pvalb	ChrimsonR_kv_eyfp_AAV	3	interneuron	2	70	-84.186	Point 8	84.8311	-52.7849	-122.396	inhibitory	-0.0394177	1.05088	1.30494
2020_09_03_exp2_TH	Pvalb	ChrimsonR_kv_eyfp_AAV	2	interneuron	2	86	-88.6456	Point 4	192.005	63.0353	-117.346	inhibitory	-1.00342	0.269641	2.09836
2020_09_03_exp2_TH	Pvalb	ChrimsonR_kv_eyfp_AAV	2	interneuron	2	86	-88.6456	Point 1	82.2101	128.423	-79.746	inhibitory	-0.185531	0.5949	2.00245
2020_09_03_exp2_TH	Pvalb	ChrimsonR_kv_eyfp_AAV	2	interneuron	2	86	-88.6456	Point 8	81.6224	-210.321	-122.396	inhibitory	-0.0674529	0.973959	4.44696
2020_09_03_exp2_TH	Pvalb	ChrimsonR_kv_eyfp_AAV	1	interneuron	2	69	-73.656	Point 4	191.337	-55.8478	-117.346	inhibitory	-0.475012	0.925551	1.96069
2020_09_03_exp1_TH	Pvalb	ChrimsonR_kv_eyfp_AAV	3	interneuron	2	256	106.054	Point 2	311.265	-102.642	112.064	inhibitory	-0.247372	0.434774	1.30582
2020_09_03_exp1_TH	Pvalb	ChrimsonR_kv_eyfp_AAV	0	interneuron	2	229	112.014	Point 10	208.752	-75.5916	94.244	inhibitory	-0.169515	0.47408	0.832209
2020_09_03_exp1_TH	Pvalb	ChrimsonR_kv_eyfp_AAV	0	interneuron	2	229	112.014	Point 12	252.723	-135.799	73.244	inhibitory	-0.086572	1.05989	1.1312
2020_09_03_exp1_TH	Pvalb	ChrimsonR_kv_eyfp_AAV	0	interneuron	2	229	112.014	Point 5	274.74	100.49	97.284	inhibitory	-0.0762011	1.44314	1.1139
2020_09_03_exp1_TH	Pvalb	ChrimsonR_kv_eyfp_AAV	0	interneuron	2	229	112.014	Point 7	319.894	53.4481	73.984	inhibitory	-0.300392	0.388371	1.06628
2020_09_03_exp1_TH	Pvalb	ChrimsonR_kv_eyfp_AAV	0	interneuron	2	229	112.014	Point 3	366.179	-44.1361	112.064	inhibitory	-0.0955223	0.757941	1.2209
2020_09_03_exp1_TH	Pvalb	ChrimsonR_kv_eyfp_AAV	0	interneuron	2	229	112.014	Point 2	311.489	6.64651	112.064	inhibitory	-0.167823	0.652405	1.86126
2020_09_03_exp1_TH	Pvalb	ChrimsonR_kv_eyfp_AAV	0	interneuron	2	229	112.014	Point 20	348.436	232.09	112.974	inhibitory	-0.0437352	1.2597	3.7773
2020_07_26_exp3_TH	Pvalb	ChrimsonR_kv_eyfp_AAV	2	interneuron	2	160	314.974	Point 5	270.219	-96.5092	331.444	inhibitory	-0.274496	0.518726	1.63886
2020_07_26_exp3_TH	Pvalb	ChrimsonR_kv_eyfp_AAV	2	interneuron	2	160	314.974	Point 7	327.387	-39.3478	331.444	inhibitory	-0.292041	0.796856	1.83544
2020_07_26_exp3_TH	Pvalb	ChrimsonR_kv_eyfp_AAV	2	interneuron	2	160	314.974	Point 11	291.053	106.052	293.794	inhibitory	-0.111206	0.610089	1.37195
2020_07_26_exp3_TH	Pvalb	ChrimsonR_kv_eyfp_AAV	2	interneuron	2	160	314.974	Point 15	352.312	-45.2125	313.474	inhibitory	-0.29825	0.4175	1.17763
2020_07_26_exp3_TH	Pvalb	ChrimsonR_kv_eyfp_AAV	2	interneuron	2	160	314.974	Point 16	388.883	122.84	313.474	inhibitory	-0.120581	0.837346	2.3493
2020_07_24_exp3_TH	Pvalb	ChrimsonR_kv_eyfp_AAV	1	interneuron	2	171	366.714	Point 6	404.771	84.1495	354.284	inhibitory	-0.141524	0.943199	7.82722
2020_07_24_exp3_TH	Pvalb	ChrimsonR_kv_eyfp_AAV	0	interneuron	2	260	366.394	Point 23	498.178	243.576	296.054	inhibitory	-0.154649	1.42858	4.28863
2020_07_24_exp3_TH	Pvalb	ChrimsonR_kv_eyfp_AAV	0	interneuron	2	260	366.394	Point 25	289.153	46.4188	329.914	inhibitory	-0.0686998	1.79031	3.7762
2020_07_23_exp1_TH	Pvalb	ChrimsonR_kv_eyfp_AAV	2	interneuron	2	133	166	Point 10	312.483	-40.2991	185.294	inhibitory	-0.272553	0.429846	1.24432
2020_07_23_exp1_TH	Pvalb	ChrimsonR_kv_eyfp_AAV	2	interneuron	2	133	166	Point 14	461.406	85.8853	205.004	inhibitory	-0.130385	1.33414	1.52593
2020_07_23_exp1_TH	Pvalb	ChrimsonR_kv_eyfp_AAV	2	interneuron	2	133	166	Point 19	356.891	16.8351	212.014	inhibitory	-0.0782444	0.759635	1.36532
2020_07_19_exp1_TH	Pvalb	ChrimsonR_kv_eyfp_AAV	1	interneuron	2	177	256.374	Point 11	264.31	-8.39372	289.144	inhibitory	-0.0253837	3.42891	0.576627
2020_07_19_exp1_TH	Pvalb	ChrimsonR_kv_eyfp_AAV	1	interneuron	2	177	256.374	Point 7	342.385	8.50432	298.374	inhibitory	-0.0426454	0.914887	1.28152
2020_07_19_exp1_TH	Pvalb	ChrimsonR_kv_eyfp_AAV	1	interneuron	2	177	256.374	Point 3	312.974	67.5356	267.834	inhibitory	-0.136141	1.03155	1.31415

## Sheet: Fig7C_exc_risetimes
Penk to PC	2.68379	2.07473	2.85998	1.44489	1.67383	1.1592	1.87646	1.40831	2.54923	1.91529	1.46245
Rorb to PC	1.35969	1.55535	3.01991	2.93063	2.11521	2.8408	2.05354	2.21811	1.38447	3.81601	1.90902	4.40066	1.74439	2.15224	1.93107	2.02743	2.62847	1.57072	2.42893	1.3632	0.889503	1.39397	2.09866	1.7223	1.49389	3.11493	1.76175	1.30099	1.28069	3.67237	1.8512	1.35254	1.8451	1.5819	0.972511	2.90177	1.95074	0.83622	1.4512	0.62155	2.25219	1.43719	2.87632	1.71601	1.80557	1.17855	1.85694	1.18234	1.25145
Tlx3 to PC	1.95416	2.39098	1.41947	1.21374	1.35282	1.87652	1.67557	1.61528	2.12725	4.41495	1.83176	3.46702	1.94735	1.37489	1.20538	1.30914	2.09614	1.8652	2.27119	1.84195	1.50362	1.68939	3.49943	2.55073	1.29441	1.12354	1.73727	1.14374	1.54195	1.56995	1.26083	1.47347	1.37352	1.10985	2.20624	1.26175	0.817151	2.11802	1.23874	1.33509	2.53335	1.78804	1.41759	1.26564	1.16503	1.43888	1.33175	1.26084	1.16554
Penk to FSI	1.18042	0.811905	1.65099	0.593256	0.761298	1.04022	1.02755	1.32449	3.7735	1.8476	2.76754	0.755012	2.69973	1.65633	1.92935	1.30528	1.46992	1.76026	1.1656	1.45345	1.56833	1.40425	1.75876	0.917081	1.4996
Rorb to FSI	1.29547	1.49118	1.17981	2.61032	1.24101	0.898729	0.955053	1.05471	0.853676	0.70073	0.869157	0.956456	1.39718	1.3833	1.63571	1.47813	1.06548	1.9344	1.06329	0.743437	0.786887	0.607017	2.12316
Tlx3 to FSI	1.25522	0.663873	1.30281	0.606632	1.56556	3.25018	0.481147	0.637363	0.676768
[truncated: 161 more columns]

## Sheet: Fig7C_inh_risetimes
Pvalb to PC	1.57441	1.37214	2.49032	2.47867	3.77862	1.77708	1.87864	3.18152	2.86764	3.42577	2.55465	2.17857	4.13987	1.36212	2.02051	2.66729	1.33864	3.06324	3.85313	5.25121	1.15944	1.33079	2.43424	4.31727	2.43478	5.02498	5.76793	1.51687	2.05027	2.94136	2.4454	1.98208	2.94089	8.37953	3.14703	2.96558	1.57264	14.1867	1.73383	2.5887	2.37881	2.50123	3.55923	2.59901	1.0922	1.96346	2.06237	2.54913	1.69035
Sst to PC	3.22536	11.8643	2.73993	4.11453	4.43421	4.70243	1.84085	6.28151	2.37553	1.75884	4.63493	2.45865	2.95898	9.82571	5.81339	7.14344	3.22405	6.08654	4.44292	8.74967	2.34518	7.23357	3.22149	3.36038	2.41741	4.06774	5.377	5.22147	4.59806	5.84819	6.3873	3.97791	3.83176	6.02334	2.03012	3.68924	4.5917	3.22824	2.99088	19.4533	2.56164	4.77978	6.02209	4.23554	5.86869	5.74507	4.09306	4.11709	5.83915
Pvalb to Pvalb	1.34824	1.5028	1.22965	1.3076	3.36975	2.07912	2.16958	2.09836	2.00245	1.96069	1.30582	0.832209	1.06628	1.86126	1.63886	1.83544	1.37195	1.17763	2.3493	7.82722	4.28863	1.24432	1.52593	1.31415
Sst to FSI	1.7392	4.71204	2.62316	2.27266	2.10895	2.81695	2.67851	2.11707	6.30252	3.80227	1.87463	1.24346	1.85562	3.08563	3.68171	1.91506	1.65182
[truncated: 47 more columns]

## Sheet: Fig7D_exc_L23PC_map
exp_id	presynapticCre	presynapticEffector	headstage	post_class	post_layer	postPia	post_z	MP_ID	prePia	x_ap	pre_z	cnx	peakOfAvg
2020_11_12_exp2_TH	Penk	ChrimsonR_kv_eyfp_AAV	1	pyramidal	2	129	252.114	Point 11	143.312	90.485	251.254	no cnx
2020_11_12_exp2_TH	Penk	ChrimsonR_kv_eyfp_AAV	1	pyramidal	2	129	252.114	Point 10	141.01	78.0073	251.254	no cnx
2020_11_12_exp2_TH	Penk	ChrimsonR_kv_eyfp_AAV	1	pyramidal	2	129	252.114	Point 13	109.728	131.992	240.424	no cnx
2020_11_12_exp2_TH	Penk	ChrimsonR_kv_eyfp_AAV	1	pyramidal	2	129	252.114	Point 12	133.015	136.474	240.424	no cnx
2020_11_12_exp2_TH	Penk	ChrimsonR_kv_eyfp_AAV	1	pyramidal	2	129	252.114	Point 15	94.206	181.442	248.474	no cnx
2020_11_12_exp2_TH	Penk	ChrimsonR_kv_eyfp_AAV	1	pyramidal	2	129	252.114	Point 14	140.516	91.6491	237.864	no cnx
2020_11_12_exp2_TH	Penk	ChrimsonR_kv_eyfp_AAV	1	pyramidal	2	129	252.114	Point 17	165.163	238.431	248.474	no cnx
2020_11_12_exp2_TH	Penk	ChrimsonR_kv_eyfp_AAV	1	pyramidal	2	129	252.114	Point 16	82.954	222.321	248.474	no cnx
2020_11_12_exp2_TH	Penk	ChrimsonR_kv_eyfp_AAV	1	pyramidal	2	129	252.114	Point 19	218.489	162.097	266.494	no cnx
2020_11_12_exp2_TH	Penk	ChrimsonR_kv_eyfp_AAV	1	pyramidal	2	129	252.114	Point 18	133.366	255.898	248.474	no cnx
2020_11_12_exp2_TH	Penk	ChrimsonR_kv_eyfp_AAV	1	pyramidal	2	129	252.114	Point 31	151.76	111.788	308.944	no cnx
2020_11_12_exp2_TH	Penk	ChrimsonR_kv_eyfp_AAV	1	pyramidal	2	129	252.114	Point 30	195.439	148.169	292.384	no cnx
2020_11_12_exp2_TH	Penk	ChrimsonR_kv_eyfp_AAV	1	pyramidal	2	129	252.114	Point 37	174.746	-137.139	253.714	no cnx
2020_11_12_exp2_TH	Penk	ChrimsonR_kv_eyfp_AAV	1	pyramidal	2	129	252.114	Point 36	166.649	-104.334	253.714	no cnx
2020_11_12_exp2_TH	Penk	ChrimsonR_kv_eyfp_AAV	1	pyramidal	2	129	252.114	Point 35	154.925	-140.941	253.714	no cnx
2020_11_12_exp2_TH	Penk	ChrimsonR_kv_eyfp_AAV	1	pyramidal	2	129	252.114	Point 34	205.88	-147.643	253.714	no cnx
2020_11_12_exp2_TH	Penk	ChrimsonR_kv_eyfp_AAV	1	pyramidal	2	129	252.114	Point 5	206.953	19.4265	255.574	no cnx
2020_11_12_exp2_TH	Penk	ChrimsonR_kv_eyfp_AAV	1	pyramidal	2	129	252.114	Point 4	118.963	126.853	255.574	no cnx
2020_11_12_exp2_TH	Penk	ChrimsonR_kv_eyfp_AAV	1	pyramidal	2	129	252.114	Point 7	233.133	85.7037	255.574	no cnx
2020_11_12_exp2_TH	Penk	ChrimsonR_kv_eyfp_AAV	1	pyramidal	2	129	252.114	Point 6	226.906	67.2659	255.574	no cnx
2020_11_12_exp2_TH	Penk	ChrimsonR_kv_eyfp_AAV	1	pyramidal	2	129	252.114	Point 1	152.299	55.533	263.364	no cnx
2020_11_12_exp2_TH	Penk	ChrimsonR_kv_eyfp_AAV	1	pyramidal	2	129	252.114	Point 3	154.722	-67.7957	255.574	no cnx
2020_11_12_exp2_TH	Penk	ChrimsonR_kv_eyfp_AAV	1	pyramidal	2	129	252.114	Point 2	114.662	-62.4276	263.364	no cnx
2020_11_12_exp2_TH	Penk	ChrimsonR_kv_eyfp_AAV	1	pyramidal	2	129	252.114	Point 9	168.091	-62.3688	251.254	no cnx
2020_11_12_exp2_TH	Penk	ChrimsonR_kv_eyfp_AAV	1	pyramidal	2	129	252.114	Point 8	96.6223	-4.27031	251.254	no cnx
2020_11_12_exp2_TH	Penk	ChrimsonR_kv_eyfp_AAV	1	pyramidal	2	129	252.114	Point 32	244.738	168.251	308.944	no cnx
2020_11_12_exp2_TH	Penk	ChrimsonR_kv_eyfp_AAV	1	pyramidal	2	129	252.114	Point 28	182.92	124.424	292.384	no cnx
2020_11_12_exp2_TH	Penk	ChrimsonR_kv_eyfp_AAV	1	pyramidal	2	129	252.114	Point 29	219.784	121.661	292.384	no cnx
2020_11_12_exp2_TH	Penk	ChrimsonR_kv_eyfp_AAV	1	pyramidal	2	129	252.114	Point 20	229.874	225.308	266.494	no cnx
2020_11_12_exp2_TH	Penk	ChrimsonR_kv_eyfp_AAV	1	pyramidal	2	129	252.114	Point 21	147.659	354.094	266.494	no cnx
2020_11_12_exp2_TH	Penk	ChrimsonR_kv_eyfp_AAV	1	pyramidal	2	129	252.114	Point 22	173.08	204.665	273.794	no cnx
2020_11_12_exp2_TH	Penk	ChrimsonR_kv_eyfp_AAV	1	pyramidal	2	129	252.114	Point 23	98.8119	268.658	273.794	no cnx
2020_11_12_exp2_TH	Penk	ChrimsonR_kv_eyfp_AAV	1	pyramidal	2	129	252.114	Point 24	197.38	324.742	273.794	no cnx
2020_11_12_exp2_TH	Penk	ChrimsonR_kv_eyfp_AAV	1	pyramidal	2	129	252.114	Point 25	162.011	111.56	281.114	no cnx
2020_11_12_exp2_TH	Penk	ChrimsonR_kv_eyfp_AAV	1	pyramidal	2	129	252.114	Point 26	135.398	92.4947	281.114	no cnx
2020_11_12_exp2_TH	Penk	ChrimsonR_kv_eyfp_AAV	1	pyramidal	2	129	252.114	Point 27	207.958	209.511	281.114	no cnx
2020_11_12_exp2_TH	Penk	ChrimsonR_kv_eyfp_AAV	1	pyramidal	2	129	252.114	Point 39	114.388	-74.2476	236.944	no cnx
2020_11_12_exp2_TH	Penk	ChrimsonR_kv_eyfp_AAV	1	pyramidal	2	129	252.114	Point 33	245.474	83.8196	308.944	no cnx
2020_11_12_exp2_TH	Penk	ChrimsonR_kv_eyfp_AAV	1	pyramidal	2	129	252.114	Point 38	162.286	-152.001	236.944	no cnx
2020_11_12_exp1_TH	Penk	ChrimsonR_kv_eyfp_AAV	3	pyramidal	2	139	386.944	Point 11	196.71	118.141	359.974	no cnx
2020_11_12_exp1_TH	Penk	ChrimsonR_kv_eyfp_AAV	3	pyramidal	2	139	386.944	Point 10	158.485	8.55304	359.974	direct
2020_11_12_exp1_TH	Penk	ChrimsonR_kv_eyfp_AAV	3	pyramidal	2	139	386.944	Point 13	197.309	23.9609	359.974	excitatory	0.260336
2020_11_12_exp1_TH	Penk	ChrimsonR_kv_eyfp_AAV	3	pyramidal	2	139	386.944	Point 12	114.34	18.9159	359.974	no cnx
2020_11_12_exp1_TH	Penk	ChrimsonR_kv_eyfp_AAV	3	pyramidal	2	139	386.944	Point 15	89.2917	-190.672	353.464	no cnx
2020_11_12_exp1_TH	Penk	ChrimsonR_kv_eyfp_AAV	3	pyramidal	2	139	386.944	Point 14	78.0854	22.2283	359.974	no cnx
2020_11_12_exp1_TH	Penk	ChrimsonR_kv_eyfp_AAV	3	pyramidal	2	139	386.944	Point 17	168.844	-79.3238	353.464	no cnx
2020_11_12_exp1_TH	Penk	ChrimsonR_kv_eyfp_AAV	3	pyramidal	2	139	386.944	Point 16	145.956	-48.5272	353.464	no cnx
2020_11_12_exp1_TH	Penk	ChrimsonR_kv_eyfp_AAV	3	pyramidal	2	139	386.944	Point 19	176.905	-43.3159	346.184	no cnx
2020_11_12_exp1_TH	Penk	ChrimsonR_kv_eyfp_AAV	3	pyramidal	2	139	386.944	Point 18	108.16	-150.712	353.464	no cnx
2020_11_12_exp1_TH	Penk	ChrimsonR_kv_eyfp_AAV	3	pyramidal	2	139	386.944	Point 5	65.3717	-214.013	362.084	no cnx
2020_11_12_exp1_TH	Penk	ChrimsonR_kv_eyfp_AAV	3	pyramidal	2	139	386.944	Point 4	162.085	-111.677	373.034	no cnx
2020_11_12_exp1_TH	Penk	ChrimsonR_kv_eyfp_AAV	3	pyramidal	2	139	386.944	Point 7	159.785	-69.2398	362.084	no cnx
2020_11_12_exp1_TH	Penk	ChrimsonR_kv_eyfp_AAV	3	pyramidal	2	139	386.944	Point 6	77.6618	-154.123	362.084	no cnx
2020_11_12_exp1_TH	Penk	ChrimsonR_kv_eyfp_AAV	3	pyramidal	2	139	386.944	Point 1	52.509	-212.105	373.034	no cnx
2020_11_12_exp1_TH	Penk	ChrimsonR_kv_eyfp_AAV	3	pyramidal	2	139	386.944	Point 3	237.207	-170.956	373.034	no cnx
2020_11_12_exp1_TH	Penk	ChrimsonR_kv_eyfp_AAV	3	pyramidal	2	139	386.944	Point 2	163.921	-198.692	373.034	no cnx
2020_11_12_exp1_TH	Penk	ChrimsonR_kv_eyfp_AAV	3	pyramidal	2	139	386.944	Point 9	60.5774	-67.2028	362.084	no cnx
2020_11_12_exp1_TH	Penk	ChrimsonR_kv_eyfp_AAV	3	pyramidal	2	139	386.944	Point 8	41.8649	-141.552	362.084	no cnx
2020_11_12_exp1_TH	Penk	ChrimsonR_kv_eyfp_AAV	3	pyramidal	2	139	386.944	Point 28	86.5464	-252.822	326.264	no cnx
2020_11_12_exp1_TH	Penk	ChrimsonR_kv_eyfp_AAV	3	pyramidal	2	139	386.944	Point 20	158.383	85.7727	346.184	no cnx
2020_11_12_exp1_TH	Penk	ChrimsonR_kv_eyfp_AAV	3	pyramidal	2	139	386.944	Point 21	121.053	116.454	346.184	no cnx
2020_11_12_exp1_TH	Penk	ChrimsonR_kv_eyfp_AAV	3	pyramidal	2	139	386.944	Point 22	126.814	164.224	346.184	no cnx
2020_11_12_exp1_TH	Penk	ChrimsonR_kv_eyfp_AAV	3	pyramidal	2	139	386.944	Point 23	175.257	99.549	333.554	no cnx
2020_11_12_exp1_TH	Penk	ChrimsonR_kv_eyfp_AAV	3	pyramidal	2	139	386.944	Point 24	144.944	43.2559	333.554	no cnx
2020_11_12_exp1_TH	Penk	ChrimsonR_kv_eyfp_AAV	3	pyramidal	2	139	386.944	Point 25	147.79	-25.2973	333.554	no cnx
2020_11_12_exp1_TH	Penk	ChrimsonR_kv_eyfp_AAV	3	pyramidal	2	139	386.944	Point 26	142.811	-41.8227	333.554	no cnx
2020_11_12_exp1_TH	Penk	ChrimsonR_kv_eyfp_AAV	3	pyramidal	2	139	386.944	Point 27	88.3588	-273.396	326.264	no cnx
2020_10_23_exp2_TH	Tlx3	ChrimsonR_kv_eyfp_AAV	0	pyramidal	2	126	586.884	Point 5	448.104	158.086	570.664	no cnx
2020_10_23_exp2_TH	Tlx3	ChrimsonR_kv_eyfp_AAV	0	pyramidal	2	126	586.884	Point 4	455.478	84.3262	570.664	no cnx
2020_10_23_exp2_TH	Tlx3	ChrimsonR_kv_eyfp_AAV	0	pyramidal	2	126	586.884	Point 7	588.86	-32.8878	566.214	no cnx
2020_10_23_exp2_TH	Tlx3	ChrimsonR_kv_eyfp_AAV	0	pyramidal	2	126	586.884	Point 6	477.903	20.838	566.214	no cnx
2020_10_23_exp2_TH	Tlx3	ChrimsonR_kv_eyfp_AAV	0	pyramidal	2	126	586.884	Point 1	426.919	-25.4594	570.654	no cnx
2020_10_23_exp2_TH	Tlx3	ChrimsonR_kv_eyfp_AAV	0	pyramidal	2	126	586.884	Point 3	462.771	7.05789	570.654	no cnx
2020_10_23_exp2_TH	Tlx3	ChrimsonR_kv_eyfp_AAV	0	pyramidal	2	126	586.884	Point 2	437.188	10.3721	570.654	no cnx
2020_10_23_exp2_TH	Tlx3	ChrimsonR_kv_eyfp_AAV	0	pyramidal	2	126	586.884	Point 9	586.582	13.2327	566.214	no cnx
2020_10_23_exp2_TH	Tlx3	ChrimsonR_kv_eyfp_AAV	0	pyramidal	2	126	586.884	Point 8	541.078	46.8709	566.214	no cnx
2020_10_23_exp2_TH	Tlx3	ChrimsonR_kv_eyfp_AAV	0	pyramidal	2	126	586.884	Point 11	598.275	78.2963	566.214	no cnx
2020_10_23_exp2_TH	Tlx3	ChrimsonR_kv_eyfp_AAV	0	pyramidal	2	126	586.884	Point 10	619.764	18.3044	566.214	no cnx
2020_10_23_exp2_TH	Tlx3	ChrimsonR_kv_eyfp_AAV	0	pyramidal	2	126	586.884	Point 13	536.1	141.687	559.724	no cnx
2020_10_23_exp2_TH	Tlx3	ChrimsonR_kv_eyfp_AAV	0	pyramidal	2	126	586.884	Point 12	433.861	96.2539	565.484	excitatory	0.286399
2020_10_23_exp2_TH	Tlx3	ChrimsonR_kv_eyfp_AAV	0	pyramidal	2	126	586.884	Point 15	532.614	45.4291	559.724	no cnx
2020_10_23_exp2_TH	Tlx3	ChrimsonR_kv_eyfp_AAV	0	pyramidal	2	126	586.884	Point 14	464.228	79.2661	559.724	no cnx
2020_10_23_exp2_TH	Tlx3	ChrimsonR_kv_eyfp_AAV	0	pyramidal	2	126	586.884	Point 17	439.289	108.991	565.484	no cnx
2020_10_23_exp2_TH	Tlx3	ChrimsonR_kv_eyfp_AAV	0	pyramidal	2	126	586.884	Point 16	599.949	93.8349	559.724	no cnx
2020_10_23_exp2_TH	Tlx3	ChrimsonR_kv_eyfp_AAV	0	pyramidal	2	126	586.884	Point 19	438.455	98.4817	556.444	no cnx
2020_10_23_exp2_TH	Tlx3	ChrimsonR_kv_eyfp_AAV	0	pyramidal	2	126	586.884	Point 18	434.711	86.6589	558.634	excitatory	0.235824
2020_10_23_exp2_TH	Tlx3	ChrimsonR_kv_eyfp_AAV	0	pyramidal	2	126	586.884	Point 20	438.781	119.453	556.444	no cnx
2020_08_21_exp2_TH	Penk	ChrimsonR_kv_eyfp_AAV	1	pyramidal	2	178	34.5241	Point 11	146.337	-123.275	-8.156	no cnx
2020_08_21_exp2_TH	Penk	ChrimsonR_kv_eyfp_AAV	1	pyramidal	2	178	34.5241	Point 10	153.602	-81.381	1.384	no cnx
2020_08_21_exp2_TH	Penk	ChrimsonR_kv_eyfp_AAV	1	pyramidal	2	178	34.5241	Point 13	206.679	-214.197	-8.156	no cnx
2020_08_21_exp2_TH	Penk	ChrimsonR_kv_eyfp_AAV	1	pyramidal	2	178	34.5241	Point 12	110.641	-175.075	-8.156	no cnx
2020_08_21_exp2_TH	Penk	ChrimsonR_kv_eyfp_AAV	1	pyramidal	2	178	34.5241	Point 15	144.594	-289.267	5.494	no cnx
2020_08_21_exp2_TH	Penk	ChrimsonR_kv_eyfp_AAV	1	pyramidal	2	178	34.5241	Point 14	83.3173	-251.327	-8.156	no cnx
2020_08_21_exp2_TH	Penk	ChrimsonR_kv_eyfp_AAV	1	pyramidal	2	178	34.5241	Point 17	267.77	-317.67	5.494	no cnx
2020_08_21_exp2_TH	Penk	ChrimsonR_kv_eyfp_AAV	1	pyramidal	2	178	34.5241	Point 16	120.661	-286.582	5.494	no cnx
2020_08_21_exp2_TH	Penk	ChrimsonR_kv_eyfp_AAV	1	pyramidal	2	178	34.5241	Point 19	277.267	-199.032	21.004	no cnx
2020_08_21_exp2_TH	Penk	ChrimsonR_kv_eyfp_AAV	1	pyramidal	2	178	34.5241	Point 18	120.731	-307.104	5.494	no cnx
2020_08_21_exp2_TH	Penk	ChrimsonR_kv_eyfp_AAV	1	pyramidal	2	178	34.5241	Point 31	185.734	-112.904	23.124	no cnx
2020_08_21_exp2_TH	Penk	ChrimsonR_kv_eyfp_AAV	1	pyramidal	2	178	34.5241	Point 30	234.969	-114.004	23.124	no cnx
2020_08_21_exp2_TH	Penk	ChrimsonR_kv_eyfp_AAV	1	pyramidal	2	178	34.5241	Point 5	95.6578	-173.289	11.204	no cnx
2020_08_21_exp2_TH	Penk	ChrimsonR_kv_eyfp_AAV	1	pyramidal	2	178	34.5241	Point 4	170.511	-164.04	11.204	no cnx
2020_08_21_exp2_TH	Penk	ChrimsonR_kv_eyfp_AAV	1	pyramidal	2	178	34.5241	Point 7	173.317	-113.775	1.384	no cnx
2020_08_21_exp2_TH	Penk	ChrimsonR_kv_eyfp_AAV	1	pyramidal	2	178	34.5241	Point 6	141.328	-107.053	1.384	no cnx
2020_08_21_exp2_TH	Penk	ChrimsonR_kv_eyfp_AAV	1	pyramidal	2	178	34.5241	Point 1	163.737	-85.1493	11.204	no cnx
2020_08_21_exp2_TH	Penk	ChrimsonR_kv_eyfp_AAV	1	pyramidal	2	178	34.5241	Point 3	74.0178	-116.349	11.204	no cnx
2020_08_21_exp2_TH	Penk	ChrimsonR_kv_eyfp_AAV	1	pyramidal	2	178	34.5241	Point 2	277.824	-141.171	11.204	no cnx
2020_08_21_exp2_TH	Penk	ChrimsonR_kv_eyfp_AAV	1	pyramidal	2	178	34.5241	Point 9	112.65	-191.98	1.384	no cnx
2020_08_21_exp2_TH	Penk	ChrimsonR_kv_eyfp_AAV	1	pyramidal	2	178	34.5241	Point 8	97.8548	-113.687	1.384	no cnx
2020_08_21_exp2_TH	Penk	ChrimsonR_kv_eyfp_AAV	1	pyramidal	2	178	34.5241	Point 32	196.949	-130.42	23.124	no cnx
2020_08_21_exp2_TH	Penk	ChrimsonR_kv_eyfp_AAV	1	pyramidal	2	178	34.5241	Point 28	108.343	-238.286	-20.896	no cnx
2020_08_21_exp2_TH	Penk	ChrimsonR_kv_eyfp_AAV	1	pyramidal	2	178	34.5241	Point 29	89.0544	-287.439	-20.896	no cnx
2020_08_21_exp2_TH	Penk	ChrimsonR_kv_eyfp_AAV	1	pyramidal	2	178	34.5241	Point 20	320.612	-179.837	21.004	no cnx
2020_08_21_exp2_TH	Penk	ChrimsonR_kv_eyfp_AAV	1	pyramidal	2	178	34.5241	Point 21	257.394	-286.619	21.004	no cnx
2020_08_21_exp2_TH	Penk	ChrimsonR_kv_eyfp_AAV	1	pyramidal	2	178	34.5241	Point 22	170.068	-240.637	21.004	no cnx
2020_08_21_exp2_TH	Penk	ChrimsonR_kv_eyfp_AAV	1	pyramidal	2	178	34.5241	Point 23	230.482	-357.781	21.004	no cnx
2020_08_21_exp2_TH	Penk	ChrimsonR_kv_eyfp_AAV	1	pyramidal	2	178	34.5241	Point 24	94.4366	-251.42	-20.896	no cnx
2020_08_21_exp2_TH	Penk	ChrimsonR_kv_eyfp_AAV	1	pyramidal	2	178	34.5241	Point 25	201.56	-103.473	-20.896	no cnx
2020_08_21_exp2_TH	Penk	ChrimsonR_kv_eyfp_AAV	1	pyramidal	2	178	34.5241	Point 26	139.922	-184.277	-20.896	no cnx
2020_08_21_exp2_TH	Penk	ChrimsonR_kv_eyfp_AAV	1	pyramidal	2	178	34.5241	Point 27	258.6	-245.727	-20.896	no cnx
2020_08_21_exp2_TH	Penk	ChrimsonR_kv_eyfp_AAV	1	pyramidal	2	178	34.5241	Point 33	182.276	-189.156	23.124	no cnx
2020_08_21_exp2_TH	Penk	ChrimsonR_kv_eyfp_AAV	0	pyramidal	2	153	24.2539	Point 11	141.322	-175.107	-8.156	no cnx
2020_08_21_exp2_TH	Penk	ChrimsonR_kv_eyfp_AAV	0	pyramidal	2	153	24.2539	Point 10	148.587	-133.213	1.384	no cnx
2020_08_21_exp2_TH	Penk	ChrimsonR_kv_eyfp_AAV	0	pyramidal	2	153	24.2539	Point 13	201.664	-266.029	-8.156	no cnx
2020_08_21_exp2_TH	Penk	ChrimsonR_kv_eyfp_AAV	0	pyramidal	2	153	24.2539	Point 12	105.626	-226.907	-8.156	no cnx
2020_08_21_exp2_TH	Penk	ChrimsonR_kv_eyfp_AAV	0	pyramidal	2	153	24.2539	Point 15	139.579	-341.099	5.494	no cnx
2020_08_21_exp2_TH	Penk	ChrimsonR_kv_eyfp_AAV	0	pyramidal	2	153	24.2539	Point 14	78.3023	-303.159	-8.156	no cnx
2020_08_21_exp2_TH	Penk	ChrimsonR_kv_eyfp_AAV	0	pyramidal	2	153	24.2539	Point 17	262.755	-369.502	5.494	no cnx
2020_08_21_exp2_TH	Penk	ChrimsonR_kv_eyfp_AAV	0	pyramidal	2	153	24.2539	Point 16	115.646	-338.414	5.494	no cnx
2020_08_21_exp2_TH	Penk	ChrimsonR_kv_eyfp_AAV	0	pyramidal	2	153	24.2539	Point 19	272.252	-250.864	21.004	no cnx
2020_08_21_exp2_TH	Penk	ChrimsonR_kv_eyfp_AAV	0	pyramidal	2	153	24.2539	Point 18	115.716	-358.936	5.494	no cnx
2020_08_21_exp2_TH	Penk	ChrimsonR_kv_eyfp_AAV	0	pyramidal	2	153	24.2539	Point 31	180.719	-164.736	23.124	no cnx
2020_08_21_exp2_TH	Penk	ChrimsonR_kv_eyfp_AAV	0	pyramidal	2	153	24.2539	Point 30	229.954	-165.836	23.124	no cnx
2020_08_21_exp2_TH	Penk	ChrimsonR_kv_eyfp_AAV	0	pyramidal	2	153	24.2539	Point 5	90.6428	-225.121	11.204	no cnx
2020_08_21_exp2_TH	Penk	ChrimsonR_kv_eyfp_AAV	0	pyramidal	2	153	24.2539	Point 4	165.496	-215.872	11.204	no cnx
2020_08_21_exp2_TH	Penk	ChrimsonR_kv_eyfp_AAV	0	pyramidal	2	153	24.2539	Point 7	168.302	-165.607	1.384	no cnx
2020_08_21_exp2_TH	Penk	ChrimsonR_kv_eyfp_AAV	0	pyramidal	2	153	24.2539	Point 6	136.313	-158.885	1.384	no cnx
2020_08_21_exp2_TH	Penk	ChrimsonR_kv_eyfp_AAV	0	pyramidal	2	153	24.2539	Point 1	158.722	-136.981	11.204	no cnx
2020_08_21_exp2_TH	Penk	ChrimsonR_kv_eyfp_AAV	0	pyramidal	2	153	24.2539	Point 3	69.0028	-168.181	11.204	no cnx
2020_08_21_exp2_TH	Penk	ChrimsonR_kv_eyfp_AAV	0	pyramidal	2	153	24.2539	Point 2	272.809	-193.003	11.204	no cnx
2020_08_21_exp2_TH	Penk	ChrimsonR_kv_eyfp_AAV	0	pyramidal	2	153	24.2539	Point 9	107.635	-243.812	1.384	no cnx
2020_08_21_exp2_TH	Penk	ChrimsonR_kv_eyfp_AAV	0	pyramidal	2	153	24.2539	Point 8	92.8398	-165.519	1.384	no cnx
2020_08_21_exp2_TH	Penk	ChrimsonR_kv_eyfp_AAV	0	pyramidal	2	153	24.2539	Point 32	191.934	-182.251	23.124	no cnx
2020_08_21_exp2_TH	Penk	ChrimsonR_kv_eyfp_AAV	0	pyramidal	2	153	24.2539	Point 28	103.328	-290.118	-20.896	no cnx
2020_08_21_exp2_TH	Penk	ChrimsonR_kv_eyfp_AAV	0	pyramidal	2	153	24.2539	Point 29	84.0394	-339.271	-20.896	no cnx
2020_08_21_exp2_TH	Penk	ChrimsonR_kv_eyfp_AAV	0	pyramidal	2	153	24.2539	Point 20	315.597	-231.668	21.004	no cnx
2020_08_21_exp2_TH	Penk	ChrimsonR_kv_eyfp_AAV	0	pyramidal	2	153	24.2539	Point 21	252.379	-338.451	21.004	no cnx
2020_08_21_exp2_TH	Penk	ChrimsonR_kv_eyfp_AAV	0	pyramidal	2	153	24.2539	Point 22	165.053	-292.469	21.004	no cnx
2020_08_21_exp2_TH	Penk	ChrimsonR_kv_eyfp_AAV	0	pyramidal	2	153	24.2539	Point 23	225.467	-409.612	21.004	no cnx
2020_08_21_exp2_TH	Penk	ChrimsonR_kv_eyfp_AAV	0	pyramidal	2	153	24.2539	Point 24	89.4216	-303.251	-20.896	no cnx
2020_08_21_exp2_TH	Penk	ChrimsonR_kv_eyfp_AAV	0	pyramidal	2	153	24.2539	Point 25	196.545	-155.305	-20.896	no cnx
2020_08_21_exp2_TH	Penk	ChrimsonR_kv_eyfp_AAV	0	pyramidal	2	153	24.2539	Point 26	134.907	-236.108	-20.896	no cnx
2020_08_21_exp2_TH	Penk	ChrimsonR_kv_eyfp_AAV	0	pyramidal	2	153	24.2539	Point 27	253.585	-297.559	-20.896	no cnx
2020_08_21_exp2_TH	Penk	ChrimsonR_kv_eyfp_AAV	0	pyramidal	2	153	24.2539	Point 33	177.261	-240.988	23.124	no cnx
2020_08_21_exp1_TH	Penk	ChrimsonR_kv_eyfp_AAV	2	pyramidal	2	97	62.664	Point 11	233.518	65.8702	54.564	no cnx
2020_08_21_exp1_TH	Penk	ChrimsonR_kv_eyfp_AAV	2	pyramidal	2	97	62.664	Point 10	193.571	98.1983	59.584	no cnx
2020_08_21_exp1_TH	Penk	ChrimsonR_kv_eyfp_AAV	2	pyramidal	2	97	62.664	Point 13	201.091	129.367	45.364	no cnx
2020_08_21_exp1_TH	Penk	ChrimsonR_kv_eyfp_AAV	2	pyramidal	2	97	62.664	Point 12	321.103	-11.4605	54.564	no cnx
2020_08_21_exp1_TH	Penk	ChrimsonR_kv_eyfp_AAV	2	pyramidal	2	97	62.664	Point 15	97.9506	67.7436	45.364	excitatory	0.468159
2020_08_21_exp1_TH	Penk	ChrimsonR_kv_eyfp_AAV	2	pyramidal	2	97	62.664	Point 14	130.286	80.9147	45.364	no cnx
2020_08_21_exp1_TH	Penk	ChrimsonR_kv_eyfp_AAV	2	pyramidal	2	97	62.664	Point 17	247.497	17.3671	45.364	no cnx
2020_08_21_exp1_TH	Penk	ChrimsonR_kv_eyfp_AAV	2	pyramidal	2	97	62.664	Point 16	178.737	-86.6088	43.054	no cnx
2020_08_21_exp1_TH	Penk	ChrimsonR_kv_eyfp_AAV	2	pyramidal	2	97	62.664	Point 19	227.069	-112.913	43.054	no cnx
2020_08_21_exp1_TH	Penk	ChrimsonR_kv_eyfp_AAV	2	pyramidal	2	97	62.664	Point 18	165.823	-115.061	43.054	no cnx
2020_08_21_exp1_TH	Penk	ChrimsonR_kv_eyfp_AAV	2	pyramidal	2	97	62.664	Point 31	143.415	126.56	23.344	no cnx
2020_08_21_exp1_TH	Penk	ChrimsonR_kv_eyfp_AAV	2	pyramidal	2	97	62.664	Point 30	276.06	37.1482	23.344	no cnx
2020_08_21_exp1_TH	Penk	ChrimsonR_kv_eyfp_AAV	2	pyramidal	2	97	62.664	Point 37	86.3498	-11.2116	15.704	no cnx
2020_08_21_exp1_TH	Penk	ChrimsonR_kv_eyfp_AAV	2	pyramidal	2	97	62.664	Point 36	173.734	123.188	15.704	no cnx
2020_08_21_exp1_TH	Penk	ChrimsonR_kv_eyfp_AAV	2	pyramidal	2	97	62.664	Point 35	155.048	155.828	15.704	no cnx
2020_08_21_exp1_TH	Penk	ChrimsonR_kv_eyfp_AAV	2	pyramidal	2	97	62.664	Point 34	168.808	148.249	23.344	no cnx
2020_08_21_exp1_TH	Penk	ChrimsonR_kv_eyfp_AAV	2	pyramidal	2	97	62.664	Point 5	243.452	81.9964	68.664	no cnx
2020_08_21_exp1_TH	Penk	ChrimsonR_kv_eyfp_AAV	2	pyramidal	2	97	62.664	Point 4	106.564	57.7907	68.664	no cnx
2020_08_21_exp1_TH	Penk	ChrimsonR_kv_eyfp_AAV	2	pyramidal	2	97	62.664	Point 7	120.831	-6.81957	59.584	direct
2020_08_21_exp1_TH	Penk	ChrimsonR_kv_eyfp_AAV	2	pyramidal	2	97	62.664	Point 6	153.238	49.1036	68.664	no cnx
2020_08_21_exp1_TH	Penk	ChrimsonR_kv_eyfp_AAV	2	pyramidal	2	97	62.664	Point 1	150.098	-125.373	76.574	no cnx
2020_08_21_exp1_TH	Penk	ChrimsonR_kv_eyfp_AAV	2	pyramidal	2	97	62.664	Point 3	78.9443	56.4635	76.574	no cnx
2020_08_21_exp1_TH	Penk	ChrimsonR_kv_eyfp_AAV	2	pyramidal	2	97	62.664	Point 2	306.744	-131.563	76.574	no cnx
2020_08_21_exp1_TH	Penk	ChrimsonR_kv_eyfp_AAV	2	pyramidal	2	97	62.664	Point 9	149.758	81.9932	59.584	no cnx
2020_08_21_exp1_TH	Penk	ChrimsonR_kv_eyfp_AAV	2	pyramidal	2	97	62.664	Point 8	167.86	51.916	59.584	no cnx
2020_08_21_exp1_TH	Penk	ChrimsonR_kv_eyfp_AAV	2	pyramidal	2	97	62.664	Point 32	102.413	121.585	23.344	no cnx
2020_08_21_exp1_TH	Penk	ChrimsonR_kv_eyfp_AAV	2	pyramidal	2	97	62.664	Point 48	93.7229	-2.66097	47.894	no cnx
2020_08_21_exp1_TH	Penk	ChrimsonR_kv_eyfp_AAV	2	pyramidal	2	97	62.664	Point 49	249.807	108.787	47.894	no cnx
2020_08_21_exp1_TH	Penk	ChrimsonR_kv_eyfp_AAV	2	pyramidal	2	97	62.664	Point 42	203.544	22.6864	7.464	no cnx
2020_08_21_exp1_TH	Penk	ChrimsonR_kv_eyfp_AAV	2	pyramidal	2	97	62.664	Point 43	91.7952	-13.8706	7.464	no cnx
2020_08_21_exp1_TH	Penk	ChrimsonR_kv_eyfp_AAV	2	pyramidal	2	97	62.664	Point 40	145.084	114.892	7.464	no cnx
2020_08_21_exp1_TH	Penk	ChrimsonR_kv_eyfp_AAV	2	pyramidal	2	97	62.664	Point 41	84.6401	48.8881	7.464	no cnx
2020_08_21_exp1_TH	Penk	ChrimsonR_kv_eyfp_AAV	2	pyramidal	2	97	62.664	Point 46	177.822	39.6661	47.894	no cnx
2020_08_21_exp1_TH	Penk	ChrimsonR_kv_eyfp_AAV	2	pyramidal	2	97	62.664	Point 47	151.679	58.9827	47.894	no cnx
2020_08_21_exp1_TH	Penk	ChrimsonR_kv_eyfp_AAV	2	pyramidal	2	97	62.664	Point 44	109.441	0.379217	7.464	no cnx
2020_08_21_exp1_TH	Penk	ChrimsonR_kv_eyfp_AAV	2	pyramidal	2	97	62.664	Point 45	136.983	98.6641	47.894	no cnx
2020_08_21_exp1_TH	Penk	ChrimsonR_kv_eyfp_AAV	2	pyramidal	2	97	62.664	Point 28	115.364	47.3076	23.344	no cnx
2020_08_21_exp1_TH	Penk	ChrimsonR_kv_eyfp_AAV	2	pyramidal	2	97	62.664	Point 29	171.523	73.8458	23.344	no cnx
2020_08_21_exp1_TH	Penk	ChrimsonR_kv_eyfp_AAV	2	pyramidal	2	97	62.664	Point 20	228.474	-121.443	43.054	no cnx
2020_08_21_exp1_TH	Penk	ChrimsonR_kv_eyfp_AAV	2	pyramidal	2	97	62.664	Point 21	123.838	-72.1759	35.484	no cnx
2020_08_21_exp1_TH	Penk	ChrimsonR_kv_eyfp_AAV	2	pyramidal	2	97	62.664	Point 22	149.692	-54.4254	35.484	no cnx
2020_08_21_exp1_TH	Penk	ChrimsonR_kv_eyfp_AAV	2	pyramidal	2	97	62.664	Point 23	199.456	-45.8021	35.484	no cnx
2020_08_21_exp1_TH	Penk	ChrimsonR_kv_eyfp_AAV	2	pyramidal	2	97	62.664	Point 24	256.029	-54.137	35.484	no cnx
2020_08_21_exp1_TH	Penk	ChrimsonR_kv_eyfp_AAV	2	pyramidal	2	97	62.664	Point 25	170.767	-55.4643	35.484	no cnx
2020_08_21_exp1_TH	Penk	ChrimsonR_kv_eyfp_AAV	2	pyramidal	2	97	62.664	Point 26	124.894	-54.7442	35.484	no cnx
2020_08_21_exp1_TH	Penk	ChrimsonR_kv_eyfp_AAV	2	pyramidal	2	97	62.664	Point 27	189.865	-84.2087	23.344	no cnx
2020_08_21_exp1_TH	Penk	ChrimsonR_kv_eyfp_AAV	2	pyramidal	2	97	62.664	Point 39	209.727	178.99	15.704	no cnx
2020_08_21_exp1_TH	Penk	ChrimsonR_kv_eyfp_AAV	2	pyramidal	2	97	62.664	Point 33	283.662	111.247	23.344	no cnx
2020_08_21_exp1_TH	Penk	ChrimsonR_kv_eyfp_AAV	2	pyramidal	2	97	62.664	Point 38	111.413	64.0612	15.704	no cnx
2020_08_21_exp1_TH	Penk	ChrimsonR_kv_eyfp_AAV	1	pyramidal	2	95	56.3338	Point 11	233.842	-24.8459	54.564	no cnx
2020_08_21_exp1_TH	Penk	ChrimsonR_kv_eyfp_AAV	1	pyramidal	2	95	56.3338	Point 10	193.895	7.48215	59.584	no cnx
2020_08_21_exp1_TH	Penk	ChrimsonR_kv_eyfp_AAV	1	pyramidal	2	95	56.3338	Point 13	201.415	38.6507	45.364	no cnx
2020_08_21_exp1_TH	Penk	ChrimsonR_kv_eyfp_AAV	1	pyramidal	2	95	56.3338	Point 12	321.427	-102.177	54.564	no cnx
2020_08_21_exp1_TH	Penk	ChrimsonR_kv_eyfp_AAV	1	pyramidal	2	95	56.3338	Point 15	98.2747	-22.9725	45.364	no cnx
2020_08_21_exp1_TH	Penk	ChrimsonR_kv_eyfp_AAV	1	pyramidal	2	95	56.3338	Point 14	130.61	-9.80137	45.364	no cnx
2020_08_21_exp1_TH	Penk	ChrimsonR_kv_eyfp_AAV	1	pyramidal	2	95	56.3338	Point 17	247.821	-73.349	45.364	no cnx
2020_08_21_exp1_TH	Penk	ChrimsonR_kv_eyfp_AAV	1	pyramidal	2	95	56.3338	Point 16	179.061	-177.325	43.054	no cnx
2020_08_21_exp1_TH	Penk	ChrimsonR_kv_eyfp_AAV	1	pyramidal	2	95	56.3338	Point 19	227.393	-203.629	43.054	no cnx
2020_08_21_exp1_TH	Penk	ChrimsonR_kv_eyfp_AAV	1	pyramidal	2	95	56.3338	Point 18	166.147	-205.777	43.054	no cnx
2020_08_21_exp1_TH	Penk	ChrimsonR_kv_eyfp_AAV	1	pyramidal	2	95	56.3338	Point 31	143.739	35.8442	23.344	no cnx
2020_08_21_exp1_TH	Penk	ChrimsonR_kv_eyfp_AAV	1	pyramidal	2	95	56.3338	Point 30	276.384	-53.568	23.344	no cnx
2020_08_21_exp1_TH	Penk	ChrimsonR_kv_eyfp_AAV	1	pyramidal	2	95	56.3338	Point 37	86.6739	-101.928	15.704	no cnx
2020_08_21_exp1_TH	Penk	ChrimsonR_kv_eyfp_AAV	1	pyramidal	2	95	56.3338	Point 36	174.058	32.4718	15.704	no cnx
2020_08_21_exp1_TH	Penk	ChrimsonR_kv_eyfp_AAV	1	pyramidal	2	95	56.3338	Point 35	155.372	65.1116	15.704	no cnx
2020_08_21_exp1_TH	Penk	ChrimsonR_kv_eyfp_AAV	1	pyramidal	2	95	56.3338	Point 34	169.132	57.5333	23.344	no cnx
2020_08_21_exp1_TH	Penk	ChrimsonR_kv_eyfp_AAV	1	pyramidal	2	95	56.3338	Point 5	243.776	-8.71975	68.664	no cnx
2020_08_21_exp1_TH	Penk	ChrimsonR_kv_eyfp_AAV	1	pyramidal	2	95	56.3338	Point 4	106.888	-32.9254	68.664	no cnx
2020_08_21_exp1_TH	Penk	ChrimsonR_kv_eyfp_AAV	1	pyramidal	2	95	56.3338	Point 7	121.155	-97.5357	59.584	no cnx
2020_08_21_exp1_TH	Penk	ChrimsonR_kv_eyfp_AAV	1	pyramidal	2	95	56.3338	Point 6	153.562	-41.6125	68.664	no cnx
2020_08_21_exp1_TH	Penk	ChrimsonR_kv_eyfp_AAV	1	pyramidal	2	95	56.3338	Point 1	150.422	-216.089	76.574	no cnx
2020_08_21_exp1_TH	Penk	ChrimsonR_kv_eyfp_AAV	1	pyramidal	2	95	56.3338	Point 3	79.2683	-34.2526	76.574	no cnx
2020_08_21_exp1_TH	Penk	ChrimsonR_kv_eyfp_AAV	1	pyramidal	2	95	56.3338	Point 2	307.068	-222.279	76.574	no cnx
2020_08_21_exp1_TH	Penk	ChrimsonR_kv_eyfp_AAV	1	pyramidal	2	95	56.3338	Point 9	150.082	-8.7229	59.584	no cnx
2020_08_21_exp1_TH	Penk	ChrimsonR_kv_eyfp_AAV	1	pyramidal	2	95	56.3338	Point 8	168.184	-38.8001	59.584	no cnx
2020_08_21_exp1_TH	Penk	ChrimsonR_kv_eyfp_AAV	1	pyramidal	2	95	56.3338	Point 32	102.737	30.8694	23.344	no cnx
2020_08_21_exp1_TH	Penk	ChrimsonR_kv_eyfp_AAV	1	pyramidal	2	95	56.3338	Point 48	94.047	-93.3771	47.894	no cnx
2020_08_21_exp1_TH	Penk	ChrimsonR_kv_eyfp_AAV	1	pyramidal	2	95	56.3338	Point 49	250.131	18.0704	47.894	no cnx
2020_08_21_exp1_TH	Penk	ChrimsonR_kv_eyfp_AAV	1	pyramidal	2	95	56.3338	Point 42	203.868	-68.0297	7.464	no cnx
2020_08_21_exp1_TH	Penk	ChrimsonR_kv_eyfp_AAV	1	pyramidal	2	95	56.3338	Point 43	92.1192	-104.587	7.464	no cnx
2020_08_21_exp1_TH	Penk	ChrimsonR_kv_eyfp_AAV	1	pyramidal	2	95	56.3338	Point 40	145.408	24.1758	7.464	no cnx
2020_08_21_exp1_TH	Penk	ChrimsonR_kv_eyfp_AAV	1	pyramidal	2	95	56.3338	Point 41	84.9642	-41.828	7.464	no cnx
2020_08_21_exp1_TH	Penk	ChrimsonR_kv_eyfp_AAV	1	pyramidal	2	95	56.3338	Point 46	178.146	-51.05	47.894	no cnx
2020_08_21_exp1_TH	Penk	ChrimsonR_kv_eyfp_AAV	1	pyramidal	2	95	56.3338	Point 47	152.003	-31.7334	47.894	no cnx
2020_08_21_exp1_TH	Penk	ChrimsonR_kv_eyfp_AAV	1	pyramidal	2	95	56.3338	Point 44	109.765	-90.3369	7.464	no cnx
2020_08_21_exp1_TH	Penk	ChrimsonR_kv_eyfp_AAV	1	pyramidal	2	95	56.3338	Point 45	137.307	7.948	47.894	no cnx
2020_08_21_exp1_TH	Penk	ChrimsonR_kv_eyfp_AAV	1	pyramidal	2	95	56.3338	Point 28	115.688	-43.4085	23.344	excitatory	0.215734
2020_08_21_exp1_TH	Penk	ChrimsonR_kv_eyfp_AAV	1	pyramidal	2	95	56.3338	Point 29	171.847	-16.8704	23.344	no cnx
2020_08_21_exp1_TH	Penk	ChrimsonR_kv_eyfp_AAV	1	pyramidal	2	95	56.3338	Point 20	228.798	-212.159	43.054	no cnx
2020_08_21_exp1_TH	Penk	ChrimsonR_kv_eyfp_AAV	1	pyramidal	2	95	56.3338	Point 21	124.162	-162.892	35.484	no cnx
2020_08_21_exp1_TH	Penk	ChrimsonR_kv_eyfp_AAV	1	pyramidal	2	95	56.3338	Point 22	150.016	-145.141	35.484	no cnx
2020_08_21_exp1_TH	Penk	ChrimsonR_kv_eyfp_AAV	1	pyramidal	2	95	56.3338	Point 23	199.78	-136.518	35.484	no cnx
2020_08_21_exp1_TH	Penk	ChrimsonR_kv_eyfp_AAV	1	pyramidal	2	95	56.3338	Point 24	256.353	-144.853	35.484	no cnx
2020_08_21_exp1_TH	Penk	ChrimsonR_kv_eyfp_AAV	1	pyramidal	2	95	56.3338	Point 25	171.091	-146.18	35.484	no cnx
2020_08_21_exp1_TH	Penk	ChrimsonR_kv_eyfp_AAV	1	pyramidal	2	95	56.3338	Point 26	125.218	-145.46	35.484	no cnx
2020_08_21_exp1_TH	Penk	ChrimsonR_kv_eyfp_AAV	1	pyramidal	2	95	56.3338	Point 27	190.189	-174.925	23.344	no cnx
2020_08_21_exp1_TH	Penk	ChrimsonR_kv_eyfp_AAV	1	pyramidal	2	95	56.3338	Point 39	210.052	88.2741	15.704	no cnx
2020_08_21_exp1_TH	Penk	ChrimsonR_kv_eyfp_AAV	1	pyramidal	2	95	56.3338	Point 33	283.986	20.5305	23.344	no cnx
2020_08_21_exp1_TH	Penk	ChrimsonR_kv_eyfp_AAV	1	pyramidal	2	95	56.3338	Point 38	111.737	-26.6549	15.704	excitatory	0.280771
2020_08_21_exp1_TH	Penk	ChrimsonR_kv_eyfp_AAV	0	pyramidal	2	109	26.124	Point 11	231.031	-128.865	54.564	no cnx
2020_08_21_exp1_TH	Penk	ChrimsonR_kv_eyfp_AAV	0	pyramidal	2	109	26.124	Point 10	191.084	-96.5367	59.584	no cnx
2020_08_21_exp1_TH	Penk	ChrimsonR_kv_eyfp_AAV	0	pyramidal	2	109	26.124	Point 13	198.605	-65.3681	45.364	no cnx
2020_08_21_exp1_TH	Penk	ChrimsonR_kv_eyfp_AAV	0	pyramidal	2	109	26.124	Point 12	318.617	-206.195	54.564	no cnx
2020_08_21_exp1_TH	Penk	ChrimsonR_kv_eyfp_AAV	0	pyramidal	2	109	26.124	Point 15	95.464	-126.991	45.364	no cnx
2020_08_21_exp1_TH	Penk	ChrimsonR_kv_eyfp_AAV	0	pyramidal	2	109	26.124	Point 14	127.8	-113.82	45.364	no cnx
2020_08_21_exp1_TH	Penk	ChrimsonR_kv_eyfp_AAV	0	pyramidal	2	109	26.124	Point 17	245.01	-177.368	45.364	no cnx
2020_08_21_exp1_TH	Penk	ChrimsonR_kv_eyfp_AAV	0	pyramidal	2	109	26.124	Point 16	176.25	-281.344	43.054	no cnx
2020_08_21_exp1_TH	Penk	ChrimsonR_kv_eyfp_AAV	0	pyramidal	2	109	26.124	Point 19	224.582	-307.648	43.054	no cnx
2020_08_21_exp1_TH	Penk	ChrimsonR_kv_eyfp_AAV	0	pyramidal	2	109	26.124	Point 18	163.336	-309.796	43.054	no cnx
2020_08_21_exp1_TH	Penk	ChrimsonR_kv_eyfp_AAV	0	pyramidal	2	109	26.124	Point 31	140.928	-68.1747	23.344	no cnx
2020_08_21_exp1_TH	Penk	ChrimsonR_kv_eyfp_AAV	0	pyramidal	2	109	26.124	Point 30	273.574	-157.587	23.344	no cnx
2020_08_21_exp1_TH	Penk	ChrimsonR_kv_eyfp_AAV	0	pyramidal	2	109	26.124	Point 37	83.8632	-205.947	15.704	no cnx
2020_08_21_exp1_TH	Penk	ChrimsonR_kv_eyfp_AAV	0	pyramidal	2	109	26.124	Point 36	171.247	-71.5471	15.704	no cnx
2020_08_21_exp1_TH	Penk	ChrimsonR_kv_eyfp_AAV	0	pyramidal	2	109	26.124	Point 35	152.562	-38.9073	15.704	no cnx
2020_08_21_exp1_TH	Penk	ChrimsonR_kv_eyfp_AAV	0	pyramidal	2	109	26.124	Point 34	166.321	-46.4855	23.344	no cnx
2020_08_21_exp1_TH	Penk	ChrimsonR_kv_eyfp_AAV	0	pyramidal	2	109	26.124	Point 5	240.965	-112.739	68.664	no cnx
2020_08_21_exp1_TH	Penk	ChrimsonR_kv_eyfp_AAV	0	pyramidal	2	109	26.124	Point 4	104.078	-136.944	68.664	no cnx
2020_08_21_exp1_TH	Penk	ChrimsonR_kv_eyfp_AAV	0	pyramidal	2	109	26.124	Point 7	118.345	-201.555	59.584	no cnx
2020_08_21_exp1_TH	Penk	ChrimsonR_kv_eyfp_AAV	0	pyramidal	2	109	26.124	Point 6	150.752	-145.631	68.664	no cnx
2020_08_21_exp1_TH	Penk	ChrimsonR_kv_eyfp_AAV	0	pyramidal	2	109	26.124	Point 1	147.611	-320.108	76.574	no cnx
2020_08_21_exp1_TH	Penk	ChrimsonR_kv_eyfp_AAV	0	pyramidal	2	109	26.124	Point 3	76.4576	-138.271	76.574	no cnx
2020_08_21_exp1_TH	Penk	ChrimsonR_kv_eyfp_AAV	0	pyramidal	2	109	26.124	Point 2	304.257	-326.298	76.574	no cnx
2020_08_21_exp1_TH	Penk	ChrimsonR_kv_eyfp_AAV	0	pyramidal	2	109	26.124	Point 9	147.271	-112.742	59.584	no cnx
2020_08_21_exp1_TH	Penk	ChrimsonR_kv_eyfp_AAV	0	pyramidal	2	109	26.124	Point 8	165.373	-142.819	59.584	no cnx
2020_08_21_exp1_TH	Penk	ChrimsonR_kv_eyfp_AAV	0	pyramidal	2	109	26.124	Point 32	99.926	-73.1495	23.344	no cnx
2020_08_21_exp1_TH	Penk	ChrimsonR_kv_eyfp_AAV	0	pyramidal	2	109	26.124	Point 48	91.2363	-197.396	47.894	no cnx
2020_08_21_exp1_TH	Penk	ChrimsonR_kv_eyfp_AAV	0	pyramidal	2	109	26.124	Point 49	247.321	-85.9484	47.894	no cnx
2020_08_21_exp1_TH	Penk	ChrimsonR_kv_eyfp_AAV	0	pyramidal	2	109	26.124	Point 42	201.057	-172.049	7.464	no cnx
2020_08_21_exp1_TH	Penk	ChrimsonR_kv_eyfp_AAV	0	pyramidal	2	109	26.124	Point 43	89.3085	-208.606	7.464	no cnx
2020_08_21_exp1_TH	Penk	ChrimsonR_kv_eyfp_AAV	0	pyramidal	2	109	26.124	Point 40	142.597	-79.843	7.464	no cnx
2020_08_21_exp1_TH	Penk	ChrimsonR_kv_eyfp_AAV	0	pyramidal	2	109	26.124	Point 41	82.1535	-145.847	7.464	no cnx
2020_08_21_exp1_TH	Penk	ChrimsonR_kv_eyfp_AAV	0	pyramidal	2	109	26.124	Point 46	175.335	-155.069	47.894	no cnx
2020_08_21_exp1_TH	Penk	ChrimsonR_kv_eyfp_AAV	0	pyramidal	2	109	26.124	Point 47	149.193	-135.752	47.894	no cnx
2020_08_21_exp1_TH	Penk	ChrimsonR_kv_eyfp_AAV	0	pyramidal	2	109	26.124	Point 44	106.954	-194.356	7.464	no cnx
2020_08_21_exp1_TH	Penk	ChrimsonR_kv_eyfp_AAV	0	pyramidal	2	109	26.124	Point 45	134.496	-96.0709	47.894	no cnx
2020_08_21_exp1_TH	Penk	ChrimsonR_kv_eyfp_AAV	0	pyramidal	2	109	26.124	Point 28	112.877	-147.427	23.344	no cnx
2020_08_21_exp1_TH	Penk	ChrimsonR_kv_eyfp_AAV	0	pyramidal	2	109	26.124	Point 29	169.036	-120.889	23.344	no cnx
2020_08_21_exp1_TH	Penk	ChrimsonR_kv_eyfp_AAV	0	pyramidal	2	109	26.124	Point 20	225.987	-316.178	43.054	no cnx
2020_08_21_exp1_TH	Penk	ChrimsonR_kv_eyfp_AAV	0	pyramidal	2	109	26.124	Point 21	121.352	-266.911	35.484	no cnx
2020_08_21_exp1_TH	Penk	ChrimsonR_kv_eyfp_AAV	0	pyramidal	2	109	26.124	Point 22	147.206	-249.16	35.484	no cnx
2020_08_21_exp1_TH	Penk	ChrimsonR_kv_eyfp_AAV	0	pyramidal	2	109	26.124	Point 23	196.969	-240.537	35.484	no cnx
2020_08_21_exp1_TH	Penk	ChrimsonR_kv_eyfp_AAV	0	pyramidal	2	109	26.124	Point 24	253.543	-248.872	35.484	no cnx
2020_08_21_exp1_TH	Penk	ChrimsonR_kv_eyfp_AAV	0	pyramidal	2	109	26.124	Point 25	168.28	-250.199	35.484	no cnx
2020_08_21_exp1_TH	Penk	ChrimsonR_kv_eyfp_AAV	0	pyramidal	2	109	26.124	Point 26	122.407	-249.479	35.484	no cnx
2020_08_21_exp1_TH	Penk	ChrimsonR_kv_eyfp_AAV	0	pyramidal	2	109	26.124	Point 27	187.378	-278.944	23.344	no cnx
2020_08_21_exp1_TH	Penk	ChrimsonR_kv_eyfp_AAV	0	pyramidal	2	109	26.124	Point 39	207.241	-15.7448	15.704	no cnx
2020_08_21_exp1_TH	Penk	ChrimsonR_kv_eyfp_AAV	0	pyramidal	2	109	26.124	Point 33	281.175	-83.4883	23.344	no cnx
2020_08_21_exp1_TH	Penk	ChrimsonR_kv_eyfp_AAV	0	pyramidal	2	109	26.124	Point 38	108.926	-130.674	15.704	no cnx
2020_08_14_exp2_TH	Rorb	Ai167	0	pyramidal	2	236	-170.886	Point 11	520.65	249.231	-192.036	no cnx
2020_08_14_exp2_TH	Rorb	Ai167	0	pyramidal	2	236	-170.886	Point 10	460.686	92.1225	-192.036	no cnx
2020_08_14_exp2_TH	Rorb	Ai167	0	pyramidal	2	236	-170.886	Point 13	614.371	140.969	-177.676	no cnx
2020_08_14_exp2_TH	Rorb	Ai167	0	pyramidal	2	236	-170.886	Point 12	637.198	101.384	-192.036	no cnx
2020_08_14_exp2_TH	Rorb	Ai167	0	pyramidal	2	236	-170.886	Point 15	353.875	3.50031	-118.916	no cnx
2020_08_14_exp2_TH	Rorb	Ai167	0	pyramidal	2	236	-170.886	Point 14	701.203	225.438	-177.656	no cnx
2020_08_14_exp2_TH	Rorb	Ai167	0	pyramidal	2	236	-170.886	Point 17	458.944	-72.3948	-132.516	no cnx
2020_08_14_exp2_TH	Rorb	Ai167	0	pyramidal	2	236	-170.886	Point 16	495.098	-77.879	-118.916	no cnx
2020_08_14_exp2_TH	Rorb	Ai167	0	pyramidal	2	236	-170.886	Point 19	496.02	-89.4311	-161.636	excitatory	0.101221
2020_08_14_exp2_TH	Rorb	Ai167	0	pyramidal	2	236	-170.886	Point 18	360.208	-87.6284	-173.666	no cnx
2020_08_14_exp2_TH	Rorb	Ai167	0	pyramidal	2	236	-170.886	Point 5	479.633	169.34	-150.096	no cnx
2020_08_14_exp2_TH	Rorb	Ai167	0	pyramidal	2	236	-170.886	Point 4	445.988	141.934	-150.096	no cnx
2020_08_14_exp2_TH	Rorb	Ai167	0	pyramidal	2	236	-170.886	Point 7	391.005	167.56	-167.166	no cnx
2020_08_14_exp2_TH	Rorb	Ai167	0	pyramidal	2	236	-170.886	Point 6	436.14	126.09	-167.166	no cnx
2020_08_14_exp2_TH	Rorb	Ai167	0	pyramidal	2	236	-170.886	Point 1	410.145	104.516	-139.786	no cnx
2020_08_14_exp2_TH	Rorb	Ai167	0	pyramidal	2	236	-170.886	Point 3	420.448	99.1407	-145.866	excitatory	0.256783
2020_08_14_exp2_TH	Rorb	Ai167	0	pyramidal	2	236	-170.886	Point 2	520.794	68.9027	-139.786	no cnx
2020_08_14_exp2_TH	Rorb	Ai167	0	pyramidal	2	236	-170.886	Point 9	416.698	164.82	-177.756	no cnx
2020_08_14_exp2_TH	Rorb	Ai167	0	pyramidal	2	236	-170.886	Point 8	355.59	174.498	-177.756	no cnx
2020_08_14_exp2_TH	Rorb	Ai167	0	pyramidal	2	236	-170.886	Point 20	526.92	-101.34	-173.666	no cnx
2020_08_14_exp2_TH	Rorb	Ai167	0	pyramidal	2	236	-170.886	Point 21	418.665	-81.2122	-202.396	no cnx
2020_08_14_exp2_TH	Rorb	Ai167	0	pyramidal	2	236	-170.886	Point 22	532.697	-60.7701	-202.396	no cnx
2020_08_14_exp1_TH	Rorb	Ai167	2	pyramidal	2	226	282.894	Point 11	353.737	78.8116	307.284	no cnx
2020_08_14_exp1_TH	Rorb	Ai167	2	pyramidal	2	226	282.894	Point 10	421.472	180.658	312.694	no cnx
2020_08_14_exp1_TH	Rorb	Ai167	2	pyramidal	2	226	282.894	Point 13	347.842	51.202	289.394	no cnx
2020_08_14_exp1_TH	Rorb	Ai167	2	pyramidal	2	226	282.894	Point 12	393.081	91.0089	289.394	no cnx
2020_08_14_exp1_TH	Rorb	Ai167	2	pyramidal	2	226	282.894	Point 15	282.277	108.082	289.394	no cnx
2020_08_14_exp1_TH	Rorb	Ai167	2	pyramidal	2	226	282.894	Point 14	395.942	57.0548	289.394	no cnx
2020_08_14_exp1_TH	Rorb	Ai167	2	pyramidal	2	226	282.894	Point 17	494.372	87.3874	376.624	no cnx
2020_08_14_exp1_TH	Rorb	Ai167	2	pyramidal	2	226	282.894	Point 16	559.238	116.103	336.124	no cnx
2020_08_14_exp1_TH	Rorb	Ai167	2	pyramidal	2	226	282.894	Point 19	554.916	-149.933	402.244	no cnx
2020_08_14_exp1_TH	Rorb	Ai167	2	pyramidal	2	226	282.894	Point 18	541.196	-62.4968	402.244	no cnx
2020_08_14_exp1_TH	Rorb	Ai167	2	pyramidal	2	226	282.894	Point 5	345.751	1.45211	337.114	no cnx
2020_08_14_exp1_TH	Rorb	Ai167	2	pyramidal	2	226	282.894	Point 4	466.017	54.0434	337.114	no cnx
2020_08_14_exp1_TH	Rorb	Ai167	2	pyramidal	2	226	282.894	Point 7	303.862	140.082	322.824	no cnx
2020_08_14_exp1_TH	Rorb	Ai167	2	pyramidal	2	226	282.894	Point 6	286.299	5.01242	337.114	no cnx
2020_08_14_exp1_TH	Rorb	Ai167	2	pyramidal	2	226	282.894	Point 1	352.785	-26.0173	350.874	no cnx
2020_08_14_exp1_TH	Rorb	Ai167	2	pyramidal	2	226	282.894	Point 3	391.137	4.42757	342.694	no cnx
2020_08_14_exp1_TH	Rorb	Ai167	2	pyramidal	2	226	282.894	Point 2	334.711	-41.4505	350.874	no cnx
2020_08_14_exp1_TH	Rorb	Ai167	2	pyramidal	2	226	282.894	Point 9	363.181	-40.9661	322.824	no cnx
2020_08_14_exp1_TH	Rorb	Ai167	2	pyramidal	2	226	282.894	Point 8	268.211	39.8917	322.824	no cnx
2020_08_14_exp1_TH	Rorb	Ai167	2	pyramidal	2	226	282.894	Point 20	684.757	-115.063	376.554	no cnx
2020_08_14_exp1_TH	Rorb	Ai167	2	pyramidal	2	226	282.894	Point 21	561.254	-155.166	376.554	no cnx
2020_08_14_exp1_TH	Rorb	Ai167	2	pyramidal	2	226	282.894	Point 22	372.529	-311.365	387.704	no cnx
2020_08_14_exp1_TH	Rorb	Ai167	2	pyramidal	2	226	282.894	Point 23	356.849	-328.564	371.374	no cnx
2020_08_14_exp1_TH	Rorb	Ai167	2	pyramidal	2	226	282.894	Point 24	397.79	-312.516	371.374	no cnx
2020_08_14_exp1_TH	Rorb	Ai167	2	pyramidal	2	226	282.894	Point 25	303.69	-279.289	344.604	no cnx
2020_08_14_exp1_TH	Rorb	Ai167	2	pyramidal	2	226	282.894	Point 26	343.019	-379.524	344.604	no cnx
2020_08_06_exp2_TH	Penk	ChrimsonR_kv_eyfp_AAV	3	pyramidal	2	248	210.264	Point 11	237.274	-605.216	203.484	no cnx
2020_08_06_exp2_TH	Penk	ChrimsonR_kv_eyfp_AAV	3	pyramidal	2	248	210.264	Point 10	226.26	-188.287	187.244	no cnx
2020_08_06_exp2_TH	Penk	ChrimsonR_kv_eyfp_AAV	3	pyramidal	2	248	210.264	Point 13	211.807	-552.103	203.484	no cnx
2020_08_06_exp2_TH	Penk	ChrimsonR_kv_eyfp_AAV	3	pyramidal	2	248	210.264	Point 12	280.732	-534.348	203.484	no cnx
2020_08_06_exp2_TH	Penk	ChrimsonR_kv_eyfp_AAV	3	pyramidal	2	248	210.264	Point 15	232.061	-592.771	203.484	no cnx
2020_08_06_exp2_TH	Penk	ChrimsonR_kv_eyfp_AAV	3	pyramidal	2	248	210.264	Point 14	254.435	-448.521	203.484	no cnx
2020_08_06_exp2_TH	Penk	ChrimsonR_kv_eyfp_AAV	3	pyramidal	2	248	210.264	Point 17	149.158	-431.181	203.484	no cnx
2020_08_06_exp2_TH	Penk	ChrimsonR_kv_eyfp_AAV	3	pyramidal	2	248	210.264	Point 16	234.175	-525.178	203.484	no cnx
2020_08_06_exp2_TH	Penk	ChrimsonR_kv_eyfp_AAV	3	pyramidal	2	248	210.264	Point 19	252.521	-334.44	203.484	no cnx
2020_08_06_exp2_TH	Penk	ChrimsonR_kv_eyfp_AAV	3	pyramidal	2	248	210.264	Point 18	200.876	-381.429	203.484	no cnx
2020_08_06_exp2_TH	Penk	ChrimsonR_kv_eyfp_AAV	3	pyramidal	2	248	210.264	Point 31	126.057	-329.605	190.314	no cnx
2020_08_06_exp2_TH	Penk	ChrimsonR_kv_eyfp_AAV	3	pyramidal	2	248	210.264	Point 30	281.592	-407.125	190.314	no cnx
2020_08_06_exp2_TH	Penk	ChrimsonR_kv_eyfp_AAV	3	pyramidal	2	248	210.264	Point 37	349.516	-305.43	184.694	no cnx
2020_08_06_exp2_TH	Penk	ChrimsonR_kv_eyfp_AAV	3	pyramidal	2	248	210.264	Point 36	261.589	-323.35	184.694	no cnx
2020_08_06_exp2_TH	Penk	ChrimsonR_kv_eyfp_AAV	3	pyramidal	2	248	210.264	Point 35	182.969	-336.501	184.694	no cnx
2020_08_06_exp2_TH	Penk	ChrimsonR_kv_eyfp_AAV	3	pyramidal	2	248	210.264	Point 34	275.639	-314.855	184.694	no cnx
2020_08_06_exp2_TH	Penk	ChrimsonR_kv_eyfp_AAV	3	pyramidal	2	248	210.264	Point 5	122.839	44.8607	194.774	no cnx
2020_08_06_exp2_TH	Penk	ChrimsonR_kv_eyfp_AAV	3	pyramidal	2	248	210.264	Point 4	144.454	13.6962	194.774	no cnx
2020_08_06_exp2_TH	Penk	ChrimsonR_kv_eyfp_AAV	3	pyramidal	2	248	210.264	Point 7	256.946	-119.347	187.244	no cnx
2020_08_06_exp2_TH	Penk	ChrimsonR_kv_eyfp_AAV	3	pyramidal	2	248	210.264	Point 6	147.042	-229.811	194.774	no cnx
2020_08_06_exp2_TH	Penk	ChrimsonR_kv_eyfp_AAV	3	pyramidal	2	248	210.264	Point 1	198.163	-1.92488	194.774	no cnx
2020_08_06_exp2_TH	Penk	ChrimsonR_kv_eyfp_AAV	3	pyramidal	2	248	210.264	Point 3	186.588	-20.1797	194.774	no cnx
2020_08_06_exp2_TH	Penk	ChrimsonR_kv_eyfp_AAV	3	pyramidal	2	248	210.264	Point 2	120.384	-56.4731	194.774	no cnx
2020_08_06_exp2_TH	Penk	ChrimsonR_kv_eyfp_AAV	3	pyramidal	2	248	210.264	Point 9	178.54	-270.015	187.244	no cnx
2020_08_06_exp2_TH	Penk	ChrimsonR_kv_eyfp_AAV	3	pyramidal	2	248	210.264	Point 8	161.443	-62.6148	187.244	no cnx
2020_08_06_exp2_TH	Penk	ChrimsonR_kv_eyfp_AAV	3	pyramidal	2	248	210.264	Point 32	281.36	-498.614	190.314	no cnx
2020_08_06_exp2_TH	Penk	ChrimsonR_kv_eyfp_AAV	3	pyramidal	2	248	210.264	Point 48	284.63	83.0582	183.844	no cnx
2020_08_06_exp2_TH	Penk	ChrimsonR_kv_eyfp_AAV	3	pyramidal	2	248	210.264	Point 42	164.53	-176.489	169.054	no cnx
2020_08_06_exp2_TH	Penk	ChrimsonR_kv_eyfp_AAV	3	pyramidal	2	248	210.264	Point 43	296.625	-74.5325	169.054	no cnx
2020_08_06_exp2_TH	Penk	ChrimsonR_kv_eyfp_AAV	3	pyramidal	2	248	210.264	Point 40	250.783	-404.873	177.214	no cnx
2020_08_06_exp2_TH	Penk	ChrimsonR_kv_eyfp_AAV	3	pyramidal	2	248	210.264	Point 41	243.266	-248.723	169.054	no cnx
2020_08_06_exp2_TH	Penk	ChrimsonR_kv_eyfp_AAV	3	pyramidal	2	248	210.264	Point 46	180.248	-152.956	183.844	no cnx
2020_08_06_exp2_TH	Penk	ChrimsonR_kv_eyfp_AAV	3	pyramidal	2	248	210.264	Point 47	310.216	75.9502	183.844	no cnx
2020_08_06_exp2_TH	Penk	ChrimsonR_kv_eyfp_AAV	3	pyramidal	2	248	210.264	Point 44	94.5899	-55.9148	169.054	no cnx
2020_08_06_exp2_TH	Penk	ChrimsonR_kv_eyfp_AAV	3	pyramidal	2	248	210.264	Point 45	298.192	34.8658	183.844	no cnx
2020_08_06_exp2_TH	Penk	ChrimsonR_kv_eyfp_AAV	3	pyramidal	2	248	210.264	Point 28	199.582	-470.826	190.314	no cnx
2020_08_06_exp2_TH	Penk	ChrimsonR_kv_eyfp_AAV	3	pyramidal	2	248	210.264	Point 29	228.535	-561.739	190.314	no cnx
2020_08_06_exp2_TH	Penk	ChrimsonR_kv_eyfp_AAV	3	pyramidal	2	248	210.264	Point 20	242.494	-483.921	200.294	no cnx
2020_08_06_exp2_TH	Penk	ChrimsonR_kv_eyfp_AAV	3	pyramidal	2	248	210.264	Point 21	249.258	-412.925	200.294	no cnx
2020_08_06_exp2_TH	Penk	ChrimsonR_kv_eyfp_AAV	3	pyramidal	2	248	210.264	Point 22	277.509	-589.103	200.294	no cnx
2020_08_06_exp2_TH	Penk	ChrimsonR_kv_eyfp_AAV	3	pyramidal	2	248	210.264	Point 23	246.841	-473.862	200.294	no cnx
2020_08_06_exp2_TH	Penk	ChrimsonR_kv_eyfp_AAV	3	pyramidal	2	248	210.264	Point 24	185.926	-585.632	200.294	no cnx
2020_08_06_exp2_TH	Penk	ChrimsonR_kv_eyfp_AAV	3	pyramidal	2	248	210.264	Point 25	206.15	-366.703	200.294	no cnx
2020_08_06_exp2_TH	Penk	ChrimsonR_kv_eyfp_AAV	3	pyramidal	2	248	210.264	Point 26	185.692	-450.123	190.314	no cnx
2020_08_06_exp2_TH	Penk	ChrimsonR_kv_eyfp_AAV	3	pyramidal	2	248	210.264	Point 27	279.588	-423.616	190.314	no cnx
2020_08_06_exp2_TH	Penk	ChrimsonR_kv_eyfp_AAV	3	pyramidal	2	248	210.264	Point 39	185.412	-475.083	177.214	no cnx
2020_08_06_exp2_TH	Penk	ChrimsonR_kv_eyfp_AAV	3	pyramidal	2	248	210.264	Point 33	213.242	-407.731	184.694	no cnx
2020_08_06_exp2_TH	Penk	ChrimsonR_kv_eyfp_AAV	3	pyramidal	2	248	210.264	Point 38	303.313	-520.606	177.214	no cnx
2020_08_06_exp2_TH	Penk	ChrimsonR_kv_eyfp_AAV	2	pyramidal	2	226	218.614	Point 11	234.751	-564.359	203.484	no cnx
2020_08_06_exp2_TH	Penk	ChrimsonR_kv_eyfp_AAV	2	pyramidal	2	226	218.614	Point 10	223.737	-147.43	187.244	no cnx
2020_08_06_exp2_TH	Penk	ChrimsonR_kv_eyfp_AAV	2	pyramidal	2	226	218.614	Point 13	209.284	-511.246	203.484	no cnx
2020_08_06_exp2_TH	Penk	ChrimsonR_kv_eyfp_AAV	2	pyramidal	2	226	218.614	Point 12	278.209	-493.491	203.484	no cnx
2020_08_06_exp2_TH	Penk	ChrimsonR_kv_eyfp_AAV	2	pyramidal	2	226	218.614	Point 15	229.538	-551.914	203.484	no cnx
2020_08_06_exp2_TH	Penk	ChrimsonR_kv_eyfp_AAV	2	pyramidal	2	226	218.614	Point 14	251.911	-407.664	203.484	no cnx
2020_08_06_exp2_TH	Penk	ChrimsonR_kv_eyfp_AAV	2	pyramidal	2	226	218.614	Point 17	146.634	-390.324	203.484	no cnx
2020_08_06_exp2_TH	Penk	ChrimsonR_kv_eyfp_AAV	2	pyramidal	2	226	218.614	Point 16	231.652	-484.321	203.484	no cnx
2020_08_06_exp2_TH	Penk	ChrimsonR_kv_eyfp_AAV	2	pyramidal	2	226	218.614	Point 19	249.998	-293.583	203.484	no cnx
2020_08_06_exp2_TH	Penk	ChrimsonR_kv_eyfp_AAV	2	pyramidal	2	226	218.614	Point 18	198.352	-340.572	203.484	no cnx
2020_08_06_exp2_TH	Penk	ChrimsonR_kv_eyfp_AAV	2	pyramidal	2	226	218.614	Point 31	123.534	-288.748	190.314	no cnx
2020_08_06_exp2_TH	Penk	ChrimsonR_kv_eyfp_AAV	2	pyramidal	2	226	218.614	Point 30	279.069	-366.268	190.314	no cnx
2020_08_06_exp2_TH	Penk	ChrimsonR_kv_eyfp_AAV	2	pyramidal	2	226	218.614	Point 37	346.992	-264.573	184.694	no cnx
2020_08_06_exp2_TH	Penk	ChrimsonR_kv_eyfp_AAV	2	pyramidal	2	226	218.614	Point 36	259.066	-282.493	184.694	no cnx
2020_08_06_exp2_TH	Penk	ChrimsonR_kv_eyfp_AAV	2	pyramidal	2	226	218.614	Point 35	180.445	-295.644	184.694	no cnx
2020_08_06_exp2_TH	Penk	ChrimsonR_kv_eyfp_AAV	2	pyramidal	2	226	218.614	Point 34	273.116	-273.998	184.694	no cnx
2020_08_06_exp2_TH	Penk	ChrimsonR_kv_eyfp_AAV	2	pyramidal	2	226	218.614	Point 5	120.316	85.7177	194.774	no cnx
2020_08_06_exp2_TH	Penk	ChrimsonR_kv_eyfp_AAV	2	pyramidal	2	226	218.614	Point 4	141.931	54.5532	194.774	no cnx
2020_08_06_exp2_TH	Penk	ChrimsonR_kv_eyfp_AAV	2	pyramidal	2	226	218.614	Point 7	254.422	-78.4897	187.244	no cnx
2020_08_06_exp2_TH	Penk	ChrimsonR_kv_eyfp_AAV	2	pyramidal	2	226	218.614	Point 6	144.518	-188.954	194.774	no cnx
2020_08_06_exp2_TH	Penk	ChrimsonR_kv_eyfp_AAV	2	pyramidal	2	226	218.614	Point 1	195.639	38.9321	194.774	no cnx
2020_08_06_exp2_TH	Penk	ChrimsonR_kv_eyfp_AAV	2	pyramidal	2	226	218.614	Point 3	184.065	20.6773	194.774	no cnx
2020_08_06_exp2_TH	Penk	ChrimsonR_kv_eyfp_AAV	2	pyramidal	2	226	218.614	Point 2	117.861	-15.6161	194.774	no cnx
2020_08_06_exp2_TH	Penk	ChrimsonR_kv_eyfp_AAV	2	pyramidal	2	226	218.614	Point 9	176.017	-229.158	187.244	no cnx
2020_08_06_exp2_TH	Penk	ChrimsonR_kv_eyfp_AAV	2	pyramidal	2	226	218.614	Point 8	158.92	-21.7578	187.244	no cnx
2020_08_06_exp2_TH	Penk	ChrimsonR_kv_eyfp_AAV	2	pyramidal	2	226	218.614	Point 32	278.836	-457.757	190.314	no cnx
2020_08_06_exp2_TH	Penk	ChrimsonR_kv_eyfp_AAV	2	pyramidal	2	226	218.614	Point 48	282.107	123.915	183.844	no cnx
2020_08_06_exp2_TH	Penk	ChrimsonR_kv_eyfp_AAV	2	pyramidal	2	226	218.614	Point 42	162.007	-135.632	169.054	no cnx
2020_08_06_exp2_TH	Penk	ChrimsonR_kv_eyfp_AAV	2	pyramidal	2	226	218.614	Point 43	294.102	-33.6755	169.054	no cnx
2020_08_06_exp2_TH	Penk	ChrimsonR_kv_eyfp_AAV	2	pyramidal	2	226	218.614	Point 40	248.26	-364.016	177.214	no cnx
2020_08_06_exp2_TH	Penk	ChrimsonR_kv_eyfp_AAV	2	pyramidal	2	226	218.614	Point 41	240.743	-207.866	169.054	no cnx
2020_08_06_exp2_TH	Penk	ChrimsonR_kv_eyfp_AAV	2	pyramidal	2	226	218.614	Point 46	177.725	-112.099	183.844	no cnx
2020_08_06_exp2_TH	Penk	ChrimsonR_kv_eyfp_AAV	2	pyramidal	2	226	218.614	Point 47	307.693	116.807	183.844	no cnx
2020_08_06_exp2_TH	Penk	ChrimsonR_kv_eyfp_AAV	2	pyramidal	2	226	218.614	Point 44	92.0667	-15.0578	169.054	no cnx
2020_08_06_exp2_TH	Penk	ChrimsonR_kv_eyfp_AAV	2	pyramidal	2	226	218.614	Point 45	295.669	75.7228	183.844	no cnx
2020_08_06_exp2_TH	Penk	ChrimsonR_kv_eyfp_AAV	2	pyramidal	2	226	218.614	Point 28	197.059	-429.969	190.314	no cnx
2020_08_06_exp2_TH	Penk	ChrimsonR_kv_eyfp_AAV	2	pyramidal	2	226	218.614	Point 29	226.012	-520.882	190.314	no cnx
2020_08_06_exp2_TH	Penk	ChrimsonR_kv_eyfp_AAV	2	pyramidal	2	226	218.614	Point 20	239.971	-443.064	200.294	no cnx
2020_08_06_exp2_TH	Penk	ChrimsonR_kv_eyfp_AAV	2	pyramidal	2	226	218.614	Point 21	246.735	-372.068	200.294	no cnx
2020_08_06_exp2_TH	Penk	ChrimsonR_kv_eyfp_AAV	2	pyramidal	2	226	218.614	Point 22	274.986	-548.246	200.294	no cnx
2020_08_06_exp2_TH	Penk	ChrimsonR_kv_eyfp_AAV	2	pyramidal	2	226	218.614	Point 23	244.318	-433.005	200.294	no cnx
2020_08_06_exp2_TH	Penk	ChrimsonR_kv_eyfp_AAV	2	pyramidal	2	226	218.614	Point 24	183.402	-544.775	200.294	no cnx
2020_08_06_exp2_TH	Penk	ChrimsonR_kv_eyfp_AAV	2	pyramidal	2	226	218.614	Point 25	203.627	-325.846	200.294	no cnx
2020_08_06_exp2_TH	Penk	ChrimsonR_kv_eyfp_AAV	2	pyramidal	2	226	218.614	Point 26	183.169	-409.266	190.314	no cnx
2020_08_06_exp2_TH	Penk	ChrimsonR_kv_eyfp_AAV	2	pyramidal	2	226	218.614	Point 27	277.064	-382.759	190.314	no cnx
2020_08_06_exp2_TH	Penk	ChrimsonR_kv_eyfp_AAV	2	pyramidal	2	226	218.614	Point 39	182.889	-434.226	177.214	no cnx
2020_08_06_exp2_TH	Penk	ChrimsonR_kv_eyfp_AAV	2	pyramidal	2	226	218.614	Point 33	210.718	-366.874	184.694	no cnx
2020_08_06_exp2_TH	Penk	ChrimsonR_kv_eyfp_AAV	2	pyramidal	2	226	218.614	Point 38	300.79	-479.749	177.214	no cnx
2020_08_06_exp1_TH	Penk	ChrimsonR_kv_eyfp_AAV	3	pyramidal	2	210	254.964	Point 5	181.35	-271.575	246.964	no cnx
2020_08_06_exp1_TH	Penk	ChrimsonR_kv_eyfp_AAV	3	pyramidal	2	210	254.964	Point 4	112.174	-172.945	246.964	no cnx
2020_08_06_exp1_TH	Penk	ChrimsonR_kv_eyfp_AAV	3	pyramidal	2	210	254.964	Point 6	120.352	-12.1467	246.964	no cnx
2020_08_06_exp1_TH	Penk	ChrimsonR_kv_eyfp_AAV	3	pyramidal	2	210	254.964	Point 1	186.537	-119.658	246.964	no cnx
2020_08_06_exp1_TH	Penk	ChrimsonR_kv_eyfp_AAV	3	pyramidal	2	210	254.964	Point 3	133.621	-63.3707	246.964	no cnx
2020_08_06_exp1_TH	Penk	ChrimsonR_kv_eyfp_AAV	3	pyramidal	2	210	254.964	Point 2	182.879	-61.2654	246.964	no cnx
2020_08_06_exp1_TH	Penk	ChrimsonR_kv_eyfp_AAV	0	pyramidal	2	206	228.774	Point 11	224.75	137.321	239.434	no cnx
2020_08_06_exp1_TH	Penk	ChrimsonR_kv_eyfp_AAV	0	pyramidal	2	206	228.774	Point 10	183.478	85.6799	239.434	no cnx
2020_08_06_exp1_TH	Penk	ChrimsonR_kv_eyfp_AAV	0	pyramidal	2	206	228.774	Point 13	91.762	46.3872	227.994	no cnx
2020_08_06_exp1_TH	Penk	ChrimsonR_kv_eyfp_AAV	0	pyramidal	2	206	228.774	Point 38	197.826	-168.363	220.304	no cnx
2020_08_06_exp1_TH	Penk	ChrimsonR_kv_eyfp_AAV	0	pyramidal	2	206	228.774	Point 15	201.619	90.2566	227.994	no cnx
2020_08_06_exp1_TH	Penk	ChrimsonR_kv_eyfp_AAV	0	pyramidal	2	206	228.774	Point 14	188.494	-69.7489	227.994	no cnx
2020_08_06_exp1_TH	Penk	ChrimsonR_kv_eyfp_AAV	0	pyramidal	2	206	228.774	Point 17	220.362	120.978	227.994	no cnx
2020_08_06_exp1_TH	Penk	ChrimsonR_kv_eyfp_AAV	0	pyramidal	2	206	228.774	Point 16	159.051	-6.38742	227.994	no cnx
2020_08_06_exp1_TH	Penk	ChrimsonR_kv_eyfp_AAV	0	pyramidal	2	206	228.774	Point 19	207.31	-12.2399	211.464	no cnx
2020_08_06_exp1_TH	Penk	ChrimsonR_kv_eyfp_AAV	0	pyramidal	2	206	228.774	Point 18	93.2802	154.93	227.994	no cnx
2020_08_06_exp1_TH	Penk	ChrimsonR_kv_eyfp_AAV	0	pyramidal	2	206	228.774	Point 31	204.653	-413.407	206.304	no cnx
2020_08_06_exp1_TH	Penk	ChrimsonR_kv_eyfp_AAV	0	pyramidal	2	206	228.774	Point 30	246.582	-133.833	220.304	no cnx
2020_08_06_exp1_TH	Penk	ChrimsonR_kv_eyfp_AAV	0	pyramidal	2	206	228.774	Point 37	226.476	-248.662	220.304	no cnx
2020_08_06_exp1_TH	Penk	ChrimsonR_kv_eyfp_AAV	0	pyramidal	2	206	228.774	Point 36	242.124	-331.153	206.304	no cnx
2020_08_06_exp1_TH	Penk	ChrimsonR_kv_eyfp_AAV	0	pyramidal	2	206	228.774	Point 35	254.17	-215.593	206.304	no cnx
2020_08_06_exp1_TH	Penk	ChrimsonR_kv_eyfp_AAV	0	pyramidal	2	206	228.774	Point 34	205.247	-400.476	206.304	no cnx
2020_08_06_exp1_TH	Penk	ChrimsonR_kv_eyfp_AAV	0	pyramidal	2	206	228.774	Point 5	191.387	-48.1421	246.964	no cnx
2020_08_06_exp1_TH	Penk	ChrimsonR_kv_eyfp_AAV	0	pyramidal	2	206	228.774	Point 4	122.212	50.4873	246.964	no cnx
2020_08_06_exp1_TH	Penk	ChrimsonR_kv_eyfp_AAV	0	pyramidal	2	206	228.774	Point 7	122.833	148.934	239.434	no cnx
2020_08_06_exp1_TH	Penk	ChrimsonR_kv_eyfp_AAV	0	pyramidal	2	206	228.774	Point 6	130.389	211.286	246.964	no cnx
2020_08_06_exp1_TH	Penk	ChrimsonR_kv_eyfp_AAV	0	pyramidal	2	206	228.774	Point 1	196.574	103.775	246.964	no cnx
2020_08_06_exp1_TH	Penk	ChrimsonR_kv_eyfp_AAV	0	pyramidal	2	206	228.774	Point 3	143.659	160.062	246.964	no cnx
2020_08_06_exp1_TH	Penk	ChrimsonR_kv_eyfp_AAV	0	pyramidal	2	206	228.774	Point 2	192.917	162.167	246.964	no cnx
2020_08_06_exp1_TH	Penk	ChrimsonR_kv_eyfp_AAV	0	pyramidal	2	206	228.774	Point 9	159.925	42.4691	239.434	no cnx
2020_08_06_exp1_TH	Penk	ChrimsonR_kv_eyfp_AAV	0	pyramidal	2	206	228.774	Point 8	253.208	-14.5804	239.434	no cnx
2020_08_06_exp1_TH	Penk	ChrimsonR_kv_eyfp_AAV	0	pyramidal	2	206	228.774	Point 32	281.131	-283.182	206.304	no cnx
2020_08_06_exp1_TH	Penk	ChrimsonR_kv_eyfp_AAV	0	pyramidal	2	206	228.774	Point 40	212.603	-158.167	220.304	no cnx
2020_08_06_exp1_TH	Penk	ChrimsonR_kv_eyfp_AAV	0	pyramidal	2	206	228.774	Point 41	196.202	-290.182	220.304	no cnx
2020_08_06_exp1_TH	Penk	ChrimsonR_kv_eyfp_AAV	0	pyramidal	2	206	228.774	Point 28	202.387	-307.243	220.304	no cnx
2020_08_06_exp1_TH	Penk	ChrimsonR_kv_eyfp_AAV	0	pyramidal	2	206	228.774	Point 29	243.426	-255.11	220.304	no cnx
2020_08_06_exp1_TH	Penk	ChrimsonR_kv_eyfp_AAV	0	pyramidal	2	206	228.774	Point 20	186.079	53.8257	211.464	excitatory	0.156442
2020_08_06_exp1_TH	Penk	ChrimsonR_kv_eyfp_AAV	0	pyramidal	2	206	228.774	Point 21	168.307	119.732	211.464	no cnx
2020_08_06_exp1_TH	Penk	ChrimsonR_kv_eyfp_AAV	0	pyramidal	2	206	228.774	Point 22	201.105	-55.0919	211.464	no cnx
2020_08_06_exp1_TH	Penk	ChrimsonR_kv_eyfp_AAV	0	pyramidal	2	206	228.774	Point 23	146.399	-258.322	220.304	no cnx
2020_08_06_exp1_TH	Penk	ChrimsonR_kv_eyfp_AAV	0	pyramidal	2	206	228.774	Point 24	218.65	-300.679	220.304	no cnx
2020_08_06_exp1_TH	Penk	ChrimsonR_kv_eyfp_AAV	0	pyramidal	2	206	228.774	Point 25	183.501	-377.516	220.304	no cnx
2020_08_06_exp1_TH	Penk	ChrimsonR_kv_eyfp_AAV	0	pyramidal	2	206	228.774	Point 26	156.231	-202.612	220.304	no cnx
2020_08_06_exp1_TH	Penk	ChrimsonR_kv_eyfp_AAV	0	pyramidal	2	206	228.774	Point 27	244.95	-151.847	220.304	no cnx
2020_08_06_exp1_TH	Penk	ChrimsonR_kv_eyfp_AAV	0	pyramidal	2	206	228.774	Point 39	216.815	-228.473	220.304	no cnx
2020_08_06_exp1_TH	Penk	ChrimsonR_kv_eyfp_AAV	0	pyramidal	2	206	228.774	Point 33	208.591	-338.944	206.304	no cnx
2020_07_31_exp2_TH	Penk	ChrimsonR_kv_eyfp_AAV	3	pyramidal	2	193	301.934	Point 59	181.391	-17.3838	315.634	direct
2020_07_31_exp2_TH	Penk	ChrimsonR_kv_eyfp_AAV	3	pyramidal	2	193	301.934	Point 58	224.19	48.6891	315.634	excitatory	0.0962846
2020_07_31_exp2_TH	Penk	ChrimsonR_kv_eyfp_AAV	3	pyramidal	2	193	301.934	Point 55	125.47	352.637	207.954	no cnx
2020_07_31_exp2_TH	Penk	ChrimsonR_kv_eyfp_AAV	3	pyramidal	2	193	301.934	Point 54	144.406	354.814	207.954	no cnx
2020_07_31_exp2_TH	Penk	ChrimsonR_kv_eyfp_AAV	3	pyramidal	2	193	301.934	Point 57	197.355	-11.1073	315.634	direct
2020_07_31_exp2_TH	Penk	ChrimsonR_kv_eyfp_AAV	3	pyramidal	2	193	301.934	Point 56	163.362	291.199	207.954	no cnx
2020_07_31_exp2_TH	Penk	ChrimsonR_kv_eyfp_AAV	3	pyramidal	2	193	301.934	Point 51	146.208	412.282	207.954	no cnx
2020_07_31_exp2_TH	Penk	ChrimsonR_kv_eyfp_AAV	3	pyramidal	2	193	301.934	Point 50	231.997	411.714	234.704	no cnx
2020_07_31_exp2_TH	Penk	ChrimsonR_kv_eyfp_AAV	3	pyramidal	2	193	301.934	Point 53	237.417	400.281	207.954	no cnx
2020_07_31_exp2_TH	Penk	ChrimsonR_kv_eyfp_AAV	3	pyramidal	2	193	301.934	Point 52	160.844	346.098	207.954	no cnx
2020_07_31_exp2_TH	Penk	ChrimsonR_kv_eyfp_AAV	3	pyramidal	2	193	301.934	Point 11	102.729	-68.7285	272.524	no cnx
2020_07_31_exp2_TH	Penk	ChrimsonR_kv_eyfp_AAV	3	pyramidal	2	193	301.934	Point 10	149.325	10.6791	272.524	no cnx
2020_07_31_exp2_TH	Penk	ChrimsonR_kv_eyfp_AAV	3	pyramidal	2	193	301.934	Point 13	130.497	-92.8115	265.514	no cnx
2020_07_31_exp2_TH	Penk	ChrimsonR_kv_eyfp_AAV	3	pyramidal	2	193	301.934	Point 12	138.652	-41.1	272.524	no cnx
2020_07_31_exp2_TH	Penk	ChrimsonR_kv_eyfp_AAV	3	pyramidal	2	193	301.934	Point 15	178.475	-112.676	258.524	no cnx
2020_07_31_exp2_TH	Penk	ChrimsonR_kv_eyfp_AAV	3	pyramidal	2	193	301.934	Point 14	124.728	-75.9353	265.514	no cnx
2020_07_31_exp2_TH	Penk	ChrimsonR_kv_eyfp_AAV	3	pyramidal	2	193	301.934	Point 17	119.777	42.3446	258.524	no cnx
2020_07_31_exp2_TH	Penk	ChrimsonR_kv_eyfp_AAV	3	pyramidal	2	193	301.934	Point 16	131.387	-1.44089	258.524	no cnx
2020_07_31_exp2_TH	Penk	ChrimsonR_kv_eyfp_AAV	3	pyramidal	2	193	301.934	Point 19	123.423	-125.861	258.524	no cnx
2020_07_31_exp2_TH	Penk	ChrimsonR_kv_eyfp_AAV	3	pyramidal	2	193	301.934	Point 18	117.878	0.735407	258.524	no cnx
2020_07_31_exp2_TH	Penk	ChrimsonR_kv_eyfp_AAV	3	pyramidal	2	193	301.934	Point 31	154.616	-43.8462	238.744	no cnx
2020_07_31_exp2_TH	Penk	ChrimsonR_kv_eyfp_AAV	3	pyramidal	2	193	301.934	Point 30	61.0752	118.408	238.744	no cnx
2020_07_31_exp2_TH	Penk	ChrimsonR_kv_eyfp_AAV	3	pyramidal	2	193	301.934	Point 37	178.99	164.275	268.344	no cnx
2020_07_31_exp2_TH	Penk	ChrimsonR_kv_eyfp_AAV	3	pyramidal	2	193	301.934	Point 36	139.771	127.873	260.744	no cnx
2020_07_31_exp2_TH	Penk	ChrimsonR_kv_eyfp_AAV	3	pyramidal	2	193	301.934	Point 35	157.225	126.919	260.744	no cnx
2020_07_31_exp2_TH	Penk	ChrimsonR_kv_eyfp_AAV	3	pyramidal	2	193	301.934	Point 34	184.176	139.826	260.744	no cnx
2020_07_31_exp2_TH	Penk	ChrimsonR_kv_eyfp_AAV	3	pyramidal	2	193	301.934	Point 5	133.784	17.6278	283.004	no cnx
2020_07_31_exp2_TH	Penk	ChrimsonR_kv_eyfp_AAV	3	pyramidal	2	193	301.934	Point 4	229.458	47.0604	283.004	no cnx
2020_07_31_exp2_TH	Penk	ChrimsonR_kv_eyfp_AAV	3	pyramidal	2	193	301.934	Point 7	239.573	5.77615	283.004	direct
2020_07_31_exp2_TH	Penk	ChrimsonR_kv_eyfp_AAV	3	pyramidal	2	193	301.934	Point 6	111.379	-89.1802	283.004	no cnx
2020_07_31_exp2_TH	Penk	ChrimsonR_kv_eyfp_AAV	3	pyramidal	2	193	301.934	Point 1	97.5352	18.0948	283.004	no cnx
2020_07_31_exp2_TH	Penk	ChrimsonR_kv_eyfp_AAV	3	pyramidal	2	193	301.934	Point 3	153.221	31.202	283.004	no cnx
2020_07_31_exp2_TH	Penk	ChrimsonR_kv_eyfp_AAV	3	pyramidal	2	193	301.934	Point 2	137.671	-111.983	283.004	no cnx
2020_07_31_exp2_TH	Penk	ChrimsonR_kv_eyfp_AAV	3	pyramidal	2	193	301.934	Point 9	166.326	-99.9868	272.524	no cnx
2020_07_31_exp2_TH	Penk	ChrimsonR_kv_eyfp_AAV	3	pyramidal	2	193	301.934	Point 8	102.809	-55.6328	272.524	no cnx
2020_07_31_exp2_TH	Penk	ChrimsonR_kv_eyfp_AAV	3	pyramidal	2	193	301.934	Point 32	153.514	6.36618	238.744	direct
2020_07_31_exp2_TH	Penk	ChrimsonR_kv_eyfp_AAV	3	pyramidal	2	193	301.934	Point 48	136.844	383.376	234.704	no cnx
2020_07_31_exp2_TH	Penk	ChrimsonR_kv_eyfp_AAV	3	pyramidal	2	193	301.934	Point 49	135.3	346.745	234.704	no cnx
2020_07_31_exp2_TH	Penk	ChrimsonR_kv_eyfp_AAV	3	pyramidal	2	193	301.934	Point 42	105.254	316.278	248.194	no cnx
2020_07_31_exp2_TH	Penk	ChrimsonR_kv_eyfp_AAV	3	pyramidal	2	193	301.934	Point 43	73.7338	246.04	234.704	no cnx
2020_07_31_exp2_TH	Penk	ChrimsonR_kv_eyfp_AAV	3	pyramidal	2	193	301.934	Point 40	108.24	337.743	248.194	no cnx
2020_07_31_exp2_TH	Penk	ChrimsonR_kv_eyfp_AAV	3	pyramidal	2	193	301.934	Point 41	148.691	259.472	248.194	no cnx
2020_07_31_exp2_TH	Penk	ChrimsonR_kv_eyfp_AAV	3	pyramidal	2	193	301.934	Point 46	177.887	387.341	234.704	no cnx
2020_07_31_exp2_TH	Penk	ChrimsonR_kv_eyfp_AAV	3	pyramidal	2	193	301.934	Point 47	128.501	250.635	234.704	no cnx
2020_07_31_exp2_TH	Penk	ChrimsonR_kv_eyfp_AAV	3	pyramidal	2	193	301.934	Point 44	114.451	294.463	234.704	no cnx
2020_07_31_exp2_TH	Penk	ChrimsonR_kv_eyfp_AAV	3	pyramidal	2	193	301.934	Point 45	166.601	308.134	234.704	no cnx
2020_07_31_exp2_TH	Penk	ChrimsonR_kv_eyfp_AAV	3	pyramidal	2	193	301.934	Point 28	130.187	151.349	246.514	no cnx
2020_07_31_exp2_TH	Penk	ChrimsonR_kv_eyfp_AAV	3	pyramidal	2	193	301.934	Point 29	255.683	236.908	238.744	no cnx
2020_07_31_exp2_TH	Penk	ChrimsonR_kv_eyfp_AAV	3	pyramidal	2	193	301.934	Point 20	87.5983	-72.572	252.764	no cnx
2020_07_31_exp2_TH	Penk	ChrimsonR_kv_eyfp_AAV	3	pyramidal	2	193	301.934	Point 21	190.504	153.734	252.764	no cnx
2020_07_31_exp2_TH	Penk	ChrimsonR_kv_eyfp_AAV	3	pyramidal	2	193	301.934	Point 22	116.032	103.026	252.764	no cnx
2020_07_31_exp2_TH	Penk	ChrimsonR_kv_eyfp_AAV	3	pyramidal	2	193	301.934	Point 23	213.175	214.547	252.764	no cnx
2020_07_31_exp2_TH	Penk	ChrimsonR_kv_eyfp_AAV	3	pyramidal	2	193	301.934	Point 24	147.435	100.837	252.764	no cnx
2020_07_31_exp2_TH	Penk	ChrimsonR_kv_eyfp_AAV	3	pyramidal	2	193	301.934	Point 25	167.425	178.588	252.764	no cnx
2020_07_31_exp2_TH	Penk	ChrimsonR_kv_eyfp_AAV	3	pyramidal	2	193	301.934	Point 26	151.272	167.817	246.514	no cnx
2020_07_31_exp2_TH	Penk	ChrimsonR_kv_eyfp_AAV	3	pyramidal	2	193	301.934	Point 27	229.875	191.245	246.514	no cnx
2020_07_31_exp2_TH	Penk	ChrimsonR_kv_eyfp_AAV	3	pyramidal	2	193	301.934	Point 39	212.701	369.948	248.194	no cnx
2020_07_31_exp2_TH	Penk	ChrimsonR_kv_eyfp_AAV	3	pyramidal	2	193	301.934	Point 33	143.699	29.4062	238.744	no cnx
2020_07_31_exp2_TH	Penk	ChrimsonR_kv_eyfp_AAV	3	pyramidal	2	193	301.934	Point 38	134.989	187.643	268.344	no cnx
2020_07_31_exp2_TH	Penk	ChrimsonR_kv_eyfp_AAV	0	pyramidal	2	141	285.264	Point 55	119.991	507.574	207.954	no cnx
2020_07_31_exp2_TH	Penk	ChrimsonR_kv_eyfp_AAV	0	pyramidal	2	141	285.264	Point 54	138.927	509.752	207.954	no cnx
2020_07_31_exp2_TH	Penk	ChrimsonR_kv_eyfp_AAV	0	pyramidal	2	141	285.264	Point 56	157.882	446.137	207.954	no cnx
2020_07_31_exp2_TH	Penk	ChrimsonR_kv_eyfp_AAV	0	pyramidal	2	141	285.264	Point 51	140.728	567.219	207.954	no cnx
2020_07_31_exp2_TH	Penk	ChrimsonR_kv_eyfp_AAV	0	pyramidal	2	141	285.264	Point 50	226.517	566.652	234.704	no cnx
2020_07_31_exp2_TH	Penk	ChrimsonR_kv_eyfp_AAV	0	pyramidal	2	141	285.264	Point 53	231.937	555.219	207.954	no cnx
2020_07_31_exp2_TH	Penk	ChrimsonR_kv_eyfp_AAV	0	pyramidal	2	141	285.264	Point 52	155.364	501.035	207.954	no cnx
2020_07_31_exp2_TH	Penk	ChrimsonR_kv_eyfp_AAV	0	pyramidal	2	141	285.264	Point 11	97.2496	86.2089	272.524	no cnx
2020_07_31_exp2_TH	Penk	ChrimsonR_kv_eyfp_AAV	0	pyramidal	2	141	285.264	Point 10	143.845	165.617	272.524	no cnx
2020_07_31_exp2_TH	Penk	ChrimsonR_kv_eyfp_AAV	0	pyramidal	2	141	285.264	Point 13	125.017	62.1259	265.514	excitatory	0.292989
2020_07_31_exp2_TH	Penk	ChrimsonR_kv_eyfp_AAV	0	pyramidal	2	141	285.264	Point 12	133.172	113.837	272.524	no cnx
2020_07_31_exp2_TH	Penk	ChrimsonR_kv_eyfp_AAV	0	pyramidal	2	141	285.264	Point 15	172.995	42.2617	258.524	no cnx
2020_07_31_exp2_TH	Penk	ChrimsonR_kv_eyfp_AAV	0	pyramidal	2	141	285.264	Point 14	119.248	79.0021	265.514	no cnx
2020_07_31_exp2_TH	Penk	ChrimsonR_kv_eyfp_AAV	0	pyramidal	2	141	285.264	Point 17	114.297	197.282	258.524	no cnx
2020_07_31_exp2_TH	Penk	ChrimsonR_kv_eyfp_AAV	0	pyramidal	2	141	285.264	Point 16	125.907	153.497	258.524	no cnx
2020_07_31_exp2_TH	Penk	ChrimsonR_kv_eyfp_AAV	0	pyramidal	2	141	285.264	Point 19	117.944	29.0764	258.524	no cnx
2020_07_31_exp2_TH	Penk	ChrimsonR_kv_eyfp_AAV	0	pyramidal	2	141	285.264	Point 18	112.399	155.673	258.524	no cnx
2020_07_31_exp2_TH	Penk	ChrimsonR_kv_eyfp_AAV	0	pyramidal	2	141	285.264	Point 31	149.137	111.091	238.744	no cnx
2020_07_31_exp2_TH	Penk	ChrimsonR_kv_eyfp_AAV	0	pyramidal	2	141	285.264	Point 30	55.5955	273.346	238.744	no cnx
2020_07_31_exp2_TH	Penk	ChrimsonR_kv_eyfp_AAV	0	pyramidal	2	141	285.264	Point 37	173.51	319.212	268.344	no cnx
2020_07_31_exp2_TH	Penk	ChrimsonR_kv_eyfp_AAV	0	pyramidal	2	141	285.264	Point 36	134.292	282.81	260.744	no cnx
2020_07_31_exp2_TH	Penk	ChrimsonR_kv_eyfp_AAV	0	pyramidal	2	141	285.264	Point 35	151.745	281.856	260.744	no cnx
2020_07_31_exp2_TH	Penk	ChrimsonR_kv_eyfp_AAV	0	pyramidal	2	141	285.264	Point 34	178.696	294.764	260.744	no cnx
2020_07_31_exp2_TH	Penk	ChrimsonR_kv_eyfp_AAV	0	pyramidal	2	141	285.264	Point 5	128.305	172.565	283.004	no cnx
2020_07_31_exp2_TH	Penk	ChrimsonR_kv_eyfp_AAV	0	pyramidal	2	141	285.264	Point 4	223.978	201.998	283.004	no cnx
2020_07_31_exp2_TH	Penk	ChrimsonR_kv_eyfp_AAV	0	pyramidal	2	141	285.264	Point 7	234.093	160.714	283.004	no cnx
2020_07_31_exp2_TH	Penk	ChrimsonR_kv_eyfp_AAV	0	pyramidal	2	141	285.264	Point 6	105.899	65.7572	283.004	no cnx
2020_07_31_exp2_TH	Penk	ChrimsonR_kv_eyfp_AAV	0	pyramidal	2	141	285.264	Point 1	92.0555	173.032	283.004	no cnx
2020_07_31_exp2_TH	Penk	ChrimsonR_kv_eyfp_AAV	0	pyramidal	2	141	285.264	Point 3	147.741	186.139	283.004	no cnx
2020_07_31_exp2_TH	Penk	ChrimsonR_kv_eyfp_AAV	0	pyramidal	2	141	285.264	Point 2	132.191	42.9541	283.004	no cnx
2020_07_31_exp2_TH	Penk	ChrimsonR_kv_eyfp_AAV	0	pyramidal	2	141	285.264	Point 9	160.846	54.9506	272.524	no cnx
2020_07_31_exp2_TH	Penk	ChrimsonR_kv_eyfp_AAV	0	pyramidal	2	141	285.264	Point 8	97.3296	99.3046	272.524	no cnx
2020_07_31_exp2_TH	Penk	ChrimsonR_kv_eyfp_AAV	0	pyramidal	2	141	285.264	Point 32	148.034	161.304	238.744	no cnx
2020_07_31_exp2_TH	Penk	ChrimsonR_kv_eyfp_AAV	0	pyramidal	2	141	285.264	Point 48	131.364	538.314	234.704	no cnx
2020_07_31_exp2_TH	Penk	ChrimsonR_kv_eyfp_AAV	0	pyramidal	2	141	285.264	Point 49	129.82	501.682	234.704	no cnx
2020_07_31_exp2_TH	Penk	ChrimsonR_kv_eyfp_AAV	0	pyramidal	2	141	285.264	Point 42	99.7742	471.215	248.194	no cnx
2020_07_31_exp2_TH	Penk	ChrimsonR_kv_eyfp_AAV	0	pyramidal	2	141	285.264	Point 43	68.2541	400.978	234.704	no cnx
2020_07_31_exp2_TH	Penk	ChrimsonR_kv_eyfp_AAV	0	pyramidal	2	141	285.264	Point 40	102.761	492.68	248.194	no cnx
2020_07_31_exp2_TH	Penk	ChrimsonR_kv_eyfp_AAV	0	pyramidal	2	141	285.264	Point 41	143.211	414.41	248.194	no cnx
2020_07_31_exp2_TH	Penk	ChrimsonR_kv_eyfp_AAV	0	pyramidal	2	141	285.264	Point 46	172.407	542.279	234.704	no cnx
2020_07_31_exp2_TH	Penk	ChrimsonR_kv_eyfp_AAV	0	pyramidal	2	141	285.264	Point 47	123.022	405.572	234.704	no cnx
2020_07_31_exp2_TH	Penk	ChrimsonR_kv_eyfp_AAV	0	pyramidal	2	141	285.264	Point 44	108.971	449.4	234.704	no cnx
2020_07_31_exp2_TH	Penk	ChrimsonR_kv_eyfp_AAV	0	pyramidal	2	141	285.264	Point 45	161.121	463.071	234.704	no cnx
2020_07_31_exp2_TH	Penk	ChrimsonR_kv_eyfp_AAV	0	pyramidal	2	141	285.264	Point 28	124.707	306.287	246.514	no cnx
2020_07_31_exp2_TH	Penk	ChrimsonR_kv_eyfp_AAV	0	pyramidal	2	141	285.264	Point 29	250.203	391.845	238.744	no cnx
2020_07_31_exp2_TH	Penk	ChrimsonR_kv_eyfp_AAV	0	pyramidal	2	141	285.264	Point 20	82.1185	82.3654	252.764	no cnx
2020_07_31_exp2_TH	Penk	ChrimsonR_kv_eyfp_AAV	0	pyramidal	2	141	285.264	Point 21	185.025	308.671	252.764	no cnx
2020_07_31_exp2_TH	Penk	ChrimsonR_kv_eyfp_AAV	0	pyramidal	2	141	285.264	Point 22	110.552	257.963	252.764	no cnx
2020_07_31_exp2_TH	Penk	ChrimsonR_kv_eyfp_AAV	0	pyramidal	2	141	285.264	Point 23	207.696	369.484	252.764	no cnx
2020_07_31_exp2_TH	Penk	ChrimsonR_kv_eyfp_AAV	0	pyramidal	2	141	285.264	Point 24	141.955	255.775	252.764	excitatory	0.124972
2020_07_31_exp2_TH	Penk	ChrimsonR_kv_eyfp_AAV	0	pyramidal	2	141	285.264	Point 25	161.946	333.525	252.764	no cnx
2020_07_31_exp2_TH	Penk	ChrimsonR_kv_eyfp_AAV	0	pyramidal	2	141	285.264	Point 26	145.792	322.754	246.514	no cnx
2020_07_31_exp2_TH	Penk	ChrimsonR_kv_eyfp_AAV	0	pyramidal	2	141	285.264	Point 27	224.396	346.183	246.514	no cnx
2020_07_31_exp2_TH	Penk	ChrimsonR_kv_eyfp_AAV	0	pyramidal	2	141	285.264	Point 39	207.222	524.885	248.194	no cnx
2020_07_31_exp2_TH	Penk	ChrimsonR_kv_eyfp_AAV	0	pyramidal	2	141	285.264	Point 33	138.219	184.344	238.744	no cnx
2020_07_31_exp2_TH	Penk	ChrimsonR_kv_eyfp_AAV	0	pyramidal	2	141	285.264	Point 38	129.509	342.581	268.344	no cnx
2020_07_31_exp1_TH	Penk	ChrimsonR_kv_eyfp_AAV	2	pyramidal	2	184	361.944	Point 5	152.765	26.0314	368.204	no cnx
2020_07_31_exp1_TH	Penk	ChrimsonR_kv_eyfp_AAV	2	pyramidal	2	184	361.944	Point 4	147.012	167.787	374.964	no cnx
2020_07_31_exp1_TH	Penk	ChrimsonR_kv_eyfp_AAV	2	pyramidal	2	184	361.944	Point 7	232.842	76.8924	368.204	no cnx
2020_07_31_exp1_TH	Penk	ChrimsonR_kv_eyfp_AAV	2	pyramidal	2	184	361.944	Point 6	210.409	39.6495	368.204	no cnx
2020_07_31_exp1_TH	Penk	ChrimsonR_kv_eyfp_AAV	2	pyramidal	2	184	361.944	Point 1	205.459	85.3612	374.964	no cnx
2020_07_31_exp1_TH	Penk	ChrimsonR_kv_eyfp_AAV	2	pyramidal	2	184	361.944	Point 3	188.168	119.452	374.964	no cnx
2020_07_31_exp1_TH	Penk	ChrimsonR_kv_eyfp_AAV	2	pyramidal	2	184	361.944	Point 2	226.935	178.158	374.964	no cnx
2020_07_31_exp1_TH	Penk	ChrimsonR_kv_eyfp_AAV	2	pyramidal	2	184	361.944	Point 21	134.698	216.081	335.504	no cnx
2020_07_31_exp1_TH	Penk	ChrimsonR_kv_eyfp_AAV	2	pyramidal	2	184	361.944	Point 9	196.367	162.556	368.204	no cnx
2020_07_31_exp1_TH	Penk	ChrimsonR_kv_eyfp_AAV	2	pyramidal	2	184	361.944	Point 8	258.87	145.559	368.204	no cnx
2020_07_31_exp1_TH	Penk	ChrimsonR_kv_eyfp_AAV	2	pyramidal	2	184	361.944	Point 11	258.608	185.531	350.334	no cnx
2020_07_31_exp1_TH	Penk	ChrimsonR_kv_eyfp_AAV	2	pyramidal	2	184	361.944	Point 10	128.904	171.237	368.204	no cnx
2020_07_31_exp1_TH	Penk	ChrimsonR_kv_eyfp_AAV	2	pyramidal	2	184	361.944	Point 13	194.245	235.595	350.334	no cnx
2020_07_31_exp1_TH	Penk	ChrimsonR_kv_eyfp_AAV	2	pyramidal	2	184	361.944	Point 12	256.886	267.979	350.334	no cnx
2020_07_31_exp1_TH	Penk	ChrimsonR_kv_eyfp_AAV	2	pyramidal	2	184	361.944	Point 15	161.702	222.392	335.504	no cnx
2020_07_31_exp1_TH	Penk	ChrimsonR_kv_eyfp_AAV	2	pyramidal	2	184	361.944	Point 14	125.342	215.002	350.334	no cnx
2020_07_31_exp1_TH	Penk	ChrimsonR_kv_eyfp_AAV	2	pyramidal	2	184	361.944	Point 17	158.216	253.429	335.504	no cnx
2020_07_31_exp1_TH	Penk	ChrimsonR_kv_eyfp_AAV	2	pyramidal	2	184	361.944	Point 16	199.959	376.265	335.504	no cnx
2020_07_31_exp1_TH	Penk	ChrimsonR_kv_eyfp_AAV	2	pyramidal	2	184	361.944	Point 19	193.381	395.977	335.504	no cnx
2020_07_31_exp1_TH	Penk	ChrimsonR_kv_eyfp_AAV	2	pyramidal	2	184	361.944	Point 18	132.543	276.762	335.504	no cnx
2020_07_31_exp1_TH	Penk	ChrimsonR_kv_eyfp_AAV	2	pyramidal	2	184	361.944	Point 20	187.272	362.128	335.504	no cnx
2020_07_30_exp3_TH	Penk	ChrimsonR_kv_eyfp_AAV	3	pyramidal	2	231	151	Point 11	57.9567	110.961	124.844	no cnx
2020_07_30_exp3_TH	Penk	ChrimsonR_kv_eyfp_AAV	3	pyramidal	2	231	151	Point 10	108.177	-213.521	125.594	no cnx
2020_07_30_exp3_TH	Penk	ChrimsonR_kv_eyfp_AAV	3	pyramidal	2	231	151	Point 13	41.5809	126.752	124.844	no cnx
2020_07_30_exp3_TH	Penk	ChrimsonR_kv_eyfp_AAV	3	pyramidal	2	231	151	Point 12	94.9596	235.09	124.844	no cnx
2020_07_30_exp3_TH	Penk	ChrimsonR_kv_eyfp_AAV	3	pyramidal	2	231	151	Point 15	102.972	345.387	124.844	no cnx
2020_07_30_exp3_TH	Penk	ChrimsonR_kv_eyfp_AAV	3	pyramidal	2	231	151	Point 14	114.457	269.439	124.844	no cnx
2020_07_30_exp3_TH	Penk	ChrimsonR_kv_eyfp_AAV	3	pyramidal	2	231	151	Point 17	87.5425	362.295	124.844	no cnx
2020_07_30_exp3_TH	Penk	ChrimsonR_kv_eyfp_AAV	3	pyramidal	2	231	151	Point 16	105.255	186.062	124.844	no cnx
2020_07_30_exp3_TH	Penk	ChrimsonR_kv_eyfp_AAV	3	pyramidal	2	231	151	Point 19	105.407	239.299	108.504	no cnx
2020_07_30_exp3_TH	Penk	ChrimsonR_kv_eyfp_AAV	3	pyramidal	2	231	151	Point 18	92.8727	283.43	108.504	no cnx
2020_07_30_exp3_TH	Penk	ChrimsonR_kv_eyfp_AAV	3	pyramidal	2	231	151	Point 31	94.8822	8.43883	89.344	no cnx
2020_07_30_exp3_TH	Penk	ChrimsonR_kv_eyfp_AAV	3	pyramidal	2	231	151	Point 30	133.393	230.339	87.534	no cnx
2020_07_30_exp3_TH	Penk	ChrimsonR_kv_eyfp_AAV	3	pyramidal	2	231	151	Point 36	329.467	-69.2834	156.564	no cnx
2020_07_30_exp3_TH	Penk	ChrimsonR_kv_eyfp_AAV	3	pyramidal	2	231	151	Point 35	192.636	-231.866	120.234	no cnx
2020_07_30_exp3_TH	Penk	ChrimsonR_kv_eyfp_AAV	3	pyramidal	2	231	151	Point 34	115.337	-140.165	120.234	no cnx
2020_07_30_exp3_TH	Penk	ChrimsonR_kv_eyfp_AAV	3	pyramidal	2	231	151	Point 5	72.8109	89.3421	113.314	no cnx
2020_07_30_exp3_TH	Penk	ChrimsonR_kv_eyfp_AAV	3	pyramidal	2	231	151	Point 4	83.2811	70.1339	113.314	no cnx
2020_07_30_exp3_TH	Penk	ChrimsonR_kv_eyfp_AAV	3	pyramidal	2	231	151	Point 7	115.674	-13.3369	101.564	no cnx
2020_07_30_exp3_TH	Penk	ChrimsonR_kv_eyfp_AAV	3	pyramidal	2	231	151	Point 6	93.6184	-31.3781	101.564	no cnx
2020_07_30_exp3_TH	Penk	ChrimsonR_kv_eyfp_AAV	3	pyramidal	2	231	151	Point 1	171.068	-26.6588	129.814	no cnx
2020_07_30_exp3_TH	Penk	ChrimsonR_kv_eyfp_AAV	3	pyramidal	2	231	151	Point 3	130.302	-138.693	113.314	no cnx
2020_07_30_exp3_TH	Penk	ChrimsonR_kv_eyfp_AAV	3	pyramidal	2	231	151	Point 2	145.931	27.4822	129.814	no cnx
2020_07_30_exp3_TH	Penk	ChrimsonR_kv_eyfp_AAV	3	pyramidal	2	231	151	Point 9	165.369	0.755146	95.704	no cnx
2020_07_30_exp3_TH	Penk	ChrimsonR_kv_eyfp_AAV	3	pyramidal	2	231	151	Point 8	109.844	74.5276	95.704	no cnx
2020_07_30_exp3_TH	Penk	ChrimsonR_kv_eyfp_AAV	3	pyramidal	2	231	151	Point 32	97.0328	89.6902	89.344	no cnx
2020_07_30_exp3_TH	Penk	ChrimsonR_kv_eyfp_AAV	3	pyramidal	2	231	151	Point 28	119.511	415.752	87.534	no cnx
2020_07_30_exp3_TH	Penk	ChrimsonR_kv_eyfp_AAV	3	pyramidal	2	231	151	Point 29	81.4396	381.328	87.534	no cnx
2020_07_30_exp3_TH	Penk	ChrimsonR_kv_eyfp_AAV	3	pyramidal	2	231	151	Point 20	89.1789	369.988	108.504	no cnx
2020_07_30_exp3_TH	Penk	ChrimsonR_kv_eyfp_AAV	3	pyramidal	2	231	151	Point 21	148.848	442.833	108.504	no cnx
2020_07_30_exp3_TH	Penk	ChrimsonR_kv_eyfp_AAV	3	pyramidal	2	231	151	Point 22	116.728	425.116	108.504	no cnx
2020_07_30_exp3_TH	Penk	ChrimsonR_kv_eyfp_AAV	3	pyramidal	2	231	151	Point 23	97.9614	444.197	99.454	no cnx
2020_07_30_exp3_TH	Penk	ChrimsonR_kv_eyfp_AAV	3	pyramidal	2	231	151	Point 24	109.674	293.445	99.454	no cnx
2020_07_30_exp3_TH	Penk	ChrimsonR_kv_eyfp_AAV	3	pyramidal	2	231	151	Point 25	118.553	349.387	99.454	no cnx
2020_07_30_exp3_TH	Penk	ChrimsonR_kv_eyfp_AAV	3	pyramidal	2	231	151	Point 26	120.707	374.659	99.454	no cnx
2020_07_30_exp3_TH	Penk	ChrimsonR_kv_eyfp_AAV	3	pyramidal	2	231	151	Point 27	137.237	462.775	87.534	no cnx
2020_07_30_exp3_TH	Penk	ChrimsonR_kv_eyfp_AAV	3	pyramidal	2	231	151	Point 33	87.3779	141.009	89.344	no cnx
2020_07_30_exp3_TH	Penk	ChrimsonR_kv_eyfp_AAV	1	pyramidal	2	254	171	Point 11	29.5514	373.703	124.844	no cnx
2020_07_30_exp3_TH	Penk	ChrimsonR_kv_eyfp_AAV	1	pyramidal	2	254	171	Point 10	79.772	49.2208	125.594	no cnx
2020_07_30_exp3_TH	Penk	ChrimsonR_kv_eyfp_AAV	1	pyramidal	2	254	171	Point 13	13.1756	389.494	124.844	no cnx
2020_07_30_exp3_TH	Penk	ChrimsonR_kv_eyfp_AAV	1	pyramidal	2	254	171	Point 12	66.5543	497.832	124.844	no cnx
2020_07_30_exp3_TH	Penk	ChrimsonR_kv_eyfp_AAV	1	pyramidal	2	254	171	Point 15	74.5664	608.129	124.844	no cnx
2020_07_30_exp3_TH	Penk	ChrimsonR_kv_eyfp_AAV	1	pyramidal	2	254	171	Point 14	86.052	532.181	124.844	no cnx
2020_07_30_exp3_TH	Penk	ChrimsonR_kv_eyfp_AAV	1	pyramidal	2	254	171	Point 17	59.1373	625.037	124.844	no cnx
2020_07_30_exp3_TH	Penk	ChrimsonR_kv_eyfp_AAV	1	pyramidal	2	254	171	Point 16	76.8497	448.804	124.844	no cnx
2020_07_30_exp3_TH	Penk	ChrimsonR_kv_eyfp_AAV	1	pyramidal	2	254	171	Point 19	77.0016	502.041	108.504	no cnx
2020_07_30_exp3_TH	Penk	ChrimsonR_kv_eyfp_AAV	1	pyramidal	2	254	171	Point 18	64.4674	546.172	108.504	no cnx
2020_07_30_exp3_TH	Penk	ChrimsonR_kv_eyfp_AAV	1	pyramidal	2	254	171	Point 31	66.477	271.181	89.344	no cnx
2020_07_30_exp3_TH	Penk	ChrimsonR_kv_eyfp_AAV	1	pyramidal	2	254	171	Point 30	104.988	493.081	87.534	no cnx
2020_07_30_exp3_TH	Penk	ChrimsonR_kv_eyfp_AAV	1	pyramidal	2	254	171	Point 36	301.062	193.459	156.564	no cnx
2020_07_30_exp3_TH	Penk	ChrimsonR_kv_eyfp_AAV	1	pyramidal	2	254	171	Point 35	164.23	30.876	120.234	no cnx
2020_07_30_exp3_TH	Penk	ChrimsonR_kv_eyfp_AAV	1	pyramidal	2	254	171	Point 34	86.9313	122.577	120.234	no cnx
2020_07_30_exp3_TH	Penk	ChrimsonR_kv_eyfp_AAV	1	pyramidal	2	254	171	Point 7	87.2688	249.405	101.564	no cnx
2020_07_30_exp3_TH	Penk	ChrimsonR_kv_eyfp_AAV	1	pyramidal	2	254	171	Point 6	65.2131	231.364	101.564	no cnx
2020_07_30_exp3_TH	Penk	ChrimsonR_kv_eyfp_AAV	1	pyramidal	2	254	171	Point 9	136.964	263.497	95.704	no cnx
2020_07_30_exp3_TH	Penk	ChrimsonR_kv_eyfp_AAV	1	pyramidal	2	254	171	Point 8	81.4385	337.27	95.704	no cnx
2020_07_30_exp3_TH	Penk	ChrimsonR_kv_eyfp_AAV	1	pyramidal	2	254	171	Point 32	68.6275	352.432	89.344	no cnx
2020_07_30_exp3_TH	Penk	ChrimsonR_kv_eyfp_AAV	1	pyramidal	2	254	171	Point 28	91.1062	678.494	87.534	no cnx
2020_07_30_exp3_TH	Penk	ChrimsonR_kv_eyfp_AAV	1	pyramidal	2	254	171	Point 29	53.0343	644.07	87.534	no cnx
2020_07_30_exp3_TH	Penk	ChrimsonR_kv_eyfp_AAV	1	pyramidal	2	254	171	Point 20	60.7736	632.73	108.504	no cnx
2020_07_30_exp3_TH	Penk	ChrimsonR_kv_eyfp_AAV	1	pyramidal	2	254	171	Point 21	120.443	705.575	108.504	no cnx
2020_07_30_exp3_TH	Penk	ChrimsonR_kv_eyfp_AAV	1	pyramidal	2	254	171	Point 22	88.3222	687.858	108.504	no cnx
2020_07_30_exp3_TH	Penk	ChrimsonR_kv_eyfp_AAV	1	pyramidal	2	254	171	Point 23	69.5561	706.939	99.454	no cnx
2020_07_30_exp3_TH	Penk	ChrimsonR_kv_eyfp_AAV	1	pyramidal	2	254	171	Point 24	81.2687	556.187	99.454	no cnx
2020_07_30_exp3_TH	Penk	ChrimsonR_kv_eyfp_AAV	1	pyramidal	2	254	171	Point 25	90.148	612.129	99.454	no cnx
2020_07_30_exp3_TH	Penk	ChrimsonR_kv_eyfp_AAV	1	pyramidal	2	254	171	Point 26	92.3017	637.401	99.454	no cnx
2020_07_30_exp3_TH	Penk	ChrimsonR_kv_eyfp_AAV	1	pyramidal	2	254	171	Point 27	108.831	725.517	87.534	no cnx
2020_07_30_exp3_TH	Penk	ChrimsonR_kv_eyfp_AAV	1	pyramidal	2	254	171	Point 33	58.9726	403.751	89.344	no cnx
2020_07_30_exp2_TH	Penk	ChrimsonR_kv_eyfp_AAV	3	pyramidal	2	158	118.604	Point 11	106.618	89.4906	116.494	no cnx	0.0851513
2020_07_30_exp2_TH	Penk	ChrimsonR_kv_eyfp_AAV	3	pyramidal	2	158	118.604	Point 10	175.756	60.0859	113.964	no cnx
2020_07_30_exp2_TH	Penk	ChrimsonR_kv_eyfp_AAV	3	pyramidal	2	158	118.604	Point 13	111.763	-18.3681	116.164	no cnx
2020_07_30_exp2_TH	Penk	ChrimsonR_kv_eyfp_AAV	3	pyramidal	2	158	118.604	Point 12	120.624	40.1105	113.964	no cnx
2020_07_30_exp2_TH	Penk	ChrimsonR_kv_eyfp_AAV	3	pyramidal	2	158	118.604	Point 14	106.889	20.215	116.164	no cnx
2020_07_30_exp2_TH	Penk	ChrimsonR_kv_eyfp_AAV	3	pyramidal	2	158	118.604	Point 16	163.069	53.5482	115.754	no cnx
2020_07_30_exp2_TH	Penk	ChrimsonR_kv_eyfp_AAV	3	pyramidal	2	158	118.604	Point 19	146.093	93.1836	102.774	no cnx
2020_07_30_exp2_TH	Penk	ChrimsonR_kv_eyfp_AAV	3	pyramidal	2	158	118.604	Point 18	106.101	168.053	116.164	no cnx
2020_07_30_exp2_TH	Penk	ChrimsonR_kv_eyfp_AAV	3	pyramidal	2	158	118.604	Point 31	119.766	302.528	93.924	no cnx
2020_07_30_exp2_TH	Penk	ChrimsonR_kv_eyfp_AAV	3	pyramidal	2	158	118.604	Point 30	112.703	281.451	93.924	no cnx
2020_07_30_exp2_TH	Penk	ChrimsonR_kv_eyfp_AAV	3	pyramidal	2	158	118.604	Point 37	56.591	237.671	65.054	no cnx
2020_07_30_exp2_TH	Penk	ChrimsonR_kv_eyfp_AAV	3	pyramidal	2	158	118.604	Point 36	166.645	224.704	82.454	no cnx
2020_07_30_exp2_TH	Penk	ChrimsonR_kv_eyfp_AAV	3	pyramidal	2	158	118.604	Point 35	117.964	274.181	82.454	no cnx
2020_07_30_exp2_TH	Penk	ChrimsonR_kv_eyfp_AAV	3	pyramidal	2	158	118.604	Point 34	80.5278	238.125	82.454	no cnx
2020_07_30_exp2_TH	Penk	ChrimsonR_kv_eyfp_AAV	3	pyramidal	2	158	118.604	Point 5	198.984	104.762	120.754	no cnx
2020_07_30_exp2_TH	Penk	ChrimsonR_kv_eyfp_AAV	3	pyramidal	2	158	118.604	Point 4	226.172	78.9886	120.744	no cnx
2020_07_30_exp2_TH	Penk	ChrimsonR_kv_eyfp_AAV	3	pyramidal	2	158	118.604	Point 7	97.8614	-70.9856	113.964	no cnx
2020_07_30_exp2_TH	Penk	ChrimsonR_kv_eyfp_AAV	3	pyramidal	2	158	118.604	Point 6	181.612	-83.8386	113.964	no cnx
2020_07_30_exp2_TH	Penk	ChrimsonR_kv_eyfp_AAV	3	pyramidal	2	158	118.604	Point 1	192.579	-167.389	120.744	no cnx
2020_07_30_exp2_TH	Penk	ChrimsonR_kv_eyfp_AAV	3	pyramidal	2	158	118.604	Point 3	153.23	-10.6756	120.744	no cnx
2020_07_30_exp2_TH	Penk	ChrimsonR_kv_eyfp_AAV	3	pyramidal	2	158	118.604	Point 2	153.394	-82.3951	120.744	no cnx
2020_07_30_exp2_TH	Penk	ChrimsonR_kv_eyfp_AAV	3	pyramidal	2	158	118.604	Point 9	116.254	-2.20354	113.964	no cnx
2020_07_30_exp2_TH	Penk	ChrimsonR_kv_eyfp_AAV	3	pyramidal	2	158	118.604	Point 8	74.0717	-32.4903	113.964	no cnx
2020_07_30_exp2_TH	Penk	ChrimsonR_kv_eyfp_AAV	3	pyramidal	2	158	118.604	Point 32	162.232	74.4869	82.454	no cnx
2020_07_30_exp2_TH	Penk	ChrimsonR_kv_eyfp_AAV	3	pyramidal	2	158	118.604	Point 48	177.714	-142.753	91.214	no cnx
2020_07_30_exp2_TH	Penk	ChrimsonR_kv_eyfp_AAV	3	pyramidal	2	158	118.604	Point 42	105.892	-174.792	98.944	no cnx
2020_07_30_exp2_TH	Penk	ChrimsonR_kv_eyfp_AAV	3	pyramidal	2	158	118.604	Point 43	128.715	-156.191	98.944	no cnx
2020_07_30_exp2_TH	Penk	ChrimsonR_kv_eyfp_AAV	3	pyramidal	2	158	118.604	Point 40	80.9687	335.546	65.054	no cnx
2020_07_30_exp2_TH	Penk	ChrimsonR_kv_eyfp_AAV	3	pyramidal	2	158	118.604	Point 41	154.084	343.015	65.054	no cnx
2020_07_30_exp2_TH	Penk	ChrimsonR_kv_eyfp_AAV	3	pyramidal	2	158	118.604	Point 46	177.067	-9.96416	91.214	direct
2020_07_30_exp2_TH	Penk	ChrimsonR_kv_eyfp_AAV	3	pyramidal	2	158	118.604	Point 47	93.845	-3.24432	91.214	no cnx
2020_07_30_exp2_TH	Penk	ChrimsonR_kv_eyfp_AAV	3	pyramidal	2	158	118.604	Point 44	89.9041	-118.665	91.214	no cnx
2020_07_30_exp2_TH	Penk	ChrimsonR_kv_eyfp_AAV	3	pyramidal	2	158	118.604	Point 45	119.733	-70.5218	91.214	no cnx
2020_07_30_exp2_TH	Penk	ChrimsonR_kv_eyfp_AAV	3	pyramidal	2	158	118.604	Point 28	94.4668	300.344	93.924	no cnx
2020_07_30_exp2_TH	Penk	ChrimsonR_kv_eyfp_AAV	3	pyramidal	2	158	118.604	Point 29	120.004	232.65	93.924	no cnx
2020_07_30_exp2_TH	Penk	ChrimsonR_kv_eyfp_AAV	3	pyramidal	2	158	118.604	Point 20	112.05	98.3551	102.774	excitatory	0.171108
2020_07_30_exp2_TH	Penk	ChrimsonR_kv_eyfp_AAV	3	pyramidal	2	158	118.604	Point 21	95.6619	140.579	102.774	no cnx
2020_07_30_exp2_TH	Penk	ChrimsonR_kv_eyfp_AAV	3	pyramidal	2	158	118.604	Point 22	118.206	134.415	102.774	no cnx
2020_07_30_exp2_TH	Penk	ChrimsonR_kv_eyfp_AAV	3	pyramidal	2	158	118.604	Point 23	92.283	224.474	102.774	no cnx
2020_07_30_exp2_TH	Penk	ChrimsonR_kv_eyfp_AAV	3	pyramidal	2	158	118.604	Point 24	148.26	297.034	102.774	no cnx
2020_07_30_exp2_TH	Penk	ChrimsonR_kv_eyfp_AAV	3	pyramidal	2	158	118.604	Point 25	100.529	165.476	102.774	no cnx
2020_07_30_exp2_TH	Penk	ChrimsonR_kv_eyfp_AAV	3	pyramidal	2	158	118.604	Point 26	111.207	151.768	93.924	no cnx
2020_07_30_exp2_TH	Penk	ChrimsonR_kv_eyfp_AAV	3	pyramidal	2	158	118.604	Point 27	117.718	205.987	93.924	no cnx
2020_07_30_exp2_TH	Penk	ChrimsonR_kv_eyfp_AAV	3	pyramidal	2	158	118.604	Point 39	87.8592	295.979	65.054	no cnx
2020_07_30_exp2_TH	Penk	ChrimsonR_kv_eyfp_AAV	3	pyramidal	2	158	118.604	Point 33	135.794	89.9693	82.454	no cnx
2020_07_30_exp2_TH	Penk	ChrimsonR_kv_eyfp_AAV	3	pyramidal	2	158	118.604	Point 38	96.3183	233.762	65.054	no cnx
2020_07_30_exp2_TH	Penk	ChrimsonR_kv_eyfp_AAV	2	pyramidal	2	183	112.564	Point 11	112.547	154.2	116.494	no cnx
2020_07_30_exp2_TH	Penk	ChrimsonR_kv_eyfp_AAV	2	pyramidal	2	183	112.564	Point 10	181.685	124.795	113.964	no cnx
2020_07_30_exp2_TH	Penk	ChrimsonR_kv_eyfp_AAV	2	pyramidal	2	183	112.564	Point 13	117.693	46.3411	116.164	no cnx
2020_07_30_exp2_TH	Penk	ChrimsonR_kv_eyfp_AAV	2	pyramidal	2	183	112.564	Point 12	126.554	104.82	113.964	no cnx
2020_07_30_exp2_TH	Penk	ChrimsonR_kv_eyfp_AAV	2	pyramidal	2	183	112.564	Point 15	116.033	262.457	116.164	no cnx
2020_07_30_exp2_TH	Penk	ChrimsonR_kv_eyfp_AAV	2	pyramidal	2	183	112.564	Point 14	112.818	84.9242	116.164	no cnx
2020_07_30_exp2_TH	Penk	ChrimsonR_kv_eyfp_AAV	2	pyramidal	2	183	112.564	Point 17	172.252	170.378	116.164	no cnx
2020_07_30_exp2_TH	Penk	ChrimsonR_kv_eyfp_AAV	2	pyramidal	2	183	112.564	Point 16	168.998	118.257	115.754	no cnx
2020_07_30_exp2_TH	Penk	ChrimsonR_kv_eyfp_AAV	2	pyramidal	2	183	112.564	Point 19	152.023	157.893	102.774	no cnx
2020_07_30_exp2_TH	Penk	ChrimsonR_kv_eyfp_AAV	2	pyramidal	2	183	112.564	Point 18	112.031	232.762	116.164	no cnx
2020_07_30_exp2_TH	Penk	ChrimsonR_kv_eyfp_AAV	2	pyramidal	2	183	112.564	Point 31	125.696	367.237	93.924	no cnx
2020_07_30_exp2_TH	Penk	ChrimsonR_kv_eyfp_AAV	2	pyramidal	2	183	112.564	Point 30	118.633	346.16	93.924	no cnx
2020_07_30_exp2_TH	Penk	ChrimsonR_kv_eyfp_AAV	2	pyramidal	2	183	112.564	Point 37	62.5205	302.38	65.054	no cnx
2020_07_30_exp2_TH	Penk	ChrimsonR_kv_eyfp_AAV	2	pyramidal	2	183	112.564	Point 36	172.574	289.413	82.454	no cnx
2020_07_30_exp2_TH	Penk	ChrimsonR_kv_eyfp_AAV	2	pyramidal	2	183	112.564	Point 35	123.894	338.891	82.454	no cnx
2020_07_30_exp2_TH	Penk	ChrimsonR_kv_eyfp_AAV	2	pyramidal	2	183	112.564	Point 34	86.4574	302.835	82.454	no cnx
2020_07_30_exp2_TH	Penk	ChrimsonR_kv_eyfp_AAV	2	pyramidal	2	183	112.564	Point 5	204.914	169.471	120.754	no cnx
2020_07_30_exp2_TH	Penk	ChrimsonR_kv_eyfp_AAV	2	pyramidal	2	183	112.564	Point 4	232.101	143.698	120.744	no cnx
2020_07_30_exp2_TH	Penk	ChrimsonR_kv_eyfp_AAV	2	pyramidal	2	183	112.564	Point 7	103.791	-6.27642	113.964	no cnx
2020_07_30_exp2_TH	Penk	ChrimsonR_kv_eyfp_AAV	2	pyramidal	2	183	112.564	Point 6	187.542	-19.1294	113.964	no cnx
2020_07_30_exp2_TH	Penk	ChrimsonR_kv_eyfp_AAV	2	pyramidal	2	183	112.564	Point 1	198.509	-102.68	120.744	no cnx
2020_07_30_exp2_TH	Penk	ChrimsonR_kv_eyfp_AAV	2	pyramidal	2	183	112.564	Point 3	159.159	54.0336	120.744	no cnx
2020_07_30_exp2_TH	Penk	ChrimsonR_kv_eyfp_AAV	2	pyramidal	2	183	112.564	Point 2	159.323	-17.6859	120.744	no cnx
2020_07_30_exp2_TH	Penk	ChrimsonR_kv_eyfp_AAV	2	pyramidal	2	183	112.564	Point 9	122.184	62.5057	113.964	no cnx
2020_07_30_exp2_TH	Penk	ChrimsonR_kv_eyfp_AAV	2	pyramidal	2	183	112.564	Point 8	80.0012	32.2189	113.964	no cnx
2020_07_30_exp2_TH	Penk	ChrimsonR_kv_eyfp_AAV	2	pyramidal	2	183	112.564	Point 32	168.161	139.196	82.454	no cnx
2020_07_30_exp2_TH	Penk	ChrimsonR_kv_eyfp_AAV	2	pyramidal	2	183	112.564	Point 40	86.8983	400.256	65.054	no cnx
2020_07_30_exp2_TH	Penk	ChrimsonR_kv_eyfp_AAV	2	pyramidal	2	183	112.564	Point 28	100.396	365.053	93.924	no cnx
2020_07_30_exp2_TH	Penk	ChrimsonR_kv_eyfp_AAV	2	pyramidal	2	183	112.564	Point 29	125.934	297.36	93.924	no cnx
2020_07_30_exp2_TH	Penk	ChrimsonR_kv_eyfp_AAV	2	pyramidal	2	183	112.564	Point 20	117.979	163.064	102.774	no cnx
2020_07_30_exp2_TH	Penk	ChrimsonR_kv_eyfp_AAV	2	pyramidal	2	183	112.564	Point 21	101.591	205.288	102.774	no cnx
2020_07_30_exp2_TH	Penk	ChrimsonR_kv_eyfp_AAV	2	pyramidal	2	183	112.564	Point 22	124.135	199.124	102.774	no cnx
2020_07_30_exp2_TH	Penk	ChrimsonR_kv_eyfp_AAV	2	pyramidal	2	183	112.564	Point 23	98.2126	289.183	102.774	no cnx
2020_07_30_exp2_TH	Penk	ChrimsonR_kv_eyfp_AAV	2	pyramidal	2	183	112.564	Point 24	154.189	361.743	102.774	no cnx
2020_07_30_exp2_TH	Penk	ChrimsonR_kv_eyfp_AAV	2	pyramidal	2	183	112.564	Point 25	106.459	230.186	102.774	no cnx
2020_07_30_exp2_TH	Penk	ChrimsonR_kv_eyfp_AAV	2	pyramidal	2	183	112.564	Point 26	117.136	216.477	93.924	no cnx
2020_07_30_exp2_TH	Penk	ChrimsonR_kv_eyfp_AAV	2	pyramidal	2	183	112.564	Point 27	123.647	270.696	93.924	no cnx
2020_07_30_exp2_TH	Penk	ChrimsonR_kv_eyfp_AAV	2	pyramidal	2	183	112.564	Point 33	141.723	154.679	82.454	no cnx
2020_07_30_exp2_TH	Penk	ChrimsonR_kv_eyfp_AAV	2	pyramidal	2	183	112.564	Point 38	102.248	298.471	65.054	no cnx
2020_07_30_exp1_TH	Penk	ChrimsonR_kv_eyfp_AAV	0	pyramidal	2	188	294.414	Point 5	107.554	232.986	215.894	no cnx
2020_07_30_exp1_TH	Penk	ChrimsonR_kv_eyfp_AAV	0	pyramidal	2	188	294.414	Point 4	138.529	220.346	238.184	no cnx
2020_07_30_exp1_TH	Penk	ChrimsonR_kv_eyfp_AAV	0	pyramidal	2	188	294.414	Point 7	115.321	259.453	206.204	no cnx
2020_07_30_exp1_TH	Penk	ChrimsonR_kv_eyfp_AAV	0	pyramidal	2	188	294.414	Point 6	110.294	278.013	215.894	no cnx
2020_07_30_exp1_TH	Penk	ChrimsonR_kv_eyfp_AAV	0	pyramidal	2	188	294.414	Point 1	140.457	83.7854	236.064	no cnx
2020_07_30_exp1_TH	Penk	ChrimsonR_kv_eyfp_AAV	0	pyramidal	2	188	294.414	Point 3	92.4559	213.439	238.184	no cnx
2020_07_30_exp1_TH	Penk	ChrimsonR_kv_eyfp_AAV	0	pyramidal	2	188	294.414	Point 2	127.4	80.2096	236.064	no cnx
2020_07_30_exp1_TH	Penk	ChrimsonR_kv_eyfp_AAV	0	pyramidal	2	188	294.414	Point 9	60.3182	254.265	206.204	no cnx
2020_07_30_exp1_TH	Penk	ChrimsonR_kv_eyfp_AAV	0	pyramidal	2	188	294.414	Point 8	140.802	288.905	206.204	no cnx
2020_07_30_exp1_TH	Penk	ChrimsonR_kv_eyfp_AAV	0	pyramidal	2	188	294.414	Point 11	114.048	292.279	202.264	no cnx
2020_07_30_exp1_TH	Penk	ChrimsonR_kv_eyfp_AAV	0	pyramidal	2	188	294.414	Point 10	58.0695	337.554	202.264	no cnx
2020_07_30_exp1_TH	Penk	ChrimsonR_kv_eyfp_AAV	0	pyramidal	2	188	294.414	Point 13	107.924	348.108	189.324	no cnx
2020_07_30_exp1_TH	Penk	ChrimsonR_kv_eyfp_AAV	0	pyramidal	2	188	294.414	Point 12	81.6471	326.034	189.324	no cnx
2020_07_30_exp1_TH	Penk	ChrimsonR_kv_eyfp_AAV	0	pyramidal	2	188	294.414	Point 14	151.092	390.574	189.324	no cnx
2020_07_09_exp3_TH	Tlx3	ChrimsonR_kv_eyfp_AAV	1	pyramidal	2	198	257.034	Point 11	521.45	112.68	260.494	no cnx
2020_07_09_exp3_TH	Tlx3	ChrimsonR_kv_eyfp_AAV	1	pyramidal	2	198	257.034	Point 10	571.366	139.753	265.484	no cnx
2020_07_09_exp3_TH	Tlx3	ChrimsonR_kv_eyfp_AAV	1	pyramidal	2	198	257.034	Point 13	559.042	-52.6377	260.494	no cnx
2020_07_09_exp3_TH	Tlx3	ChrimsonR_kv_eyfp_AAV	1	pyramidal	2	198	257.034	Point 12	556.648	-75.9154	260.494	no cnx
2020_07_09_exp3_TH	Tlx3	ChrimsonR_kv_eyfp_AAV	1	pyramidal	2	198	257.034	Point 15	464.916	11.1214	249.274	no cnx
2020_07_09_exp3_TH	Tlx3	ChrimsonR_kv_eyfp_AAV	1	pyramidal	2	198	257.034	Point 14	530.383	-86.5051	260.494	no cnx
2020_07_09_exp3_TH	Tlx3	ChrimsonR_kv_eyfp_AAV	1	pyramidal	2	198	257.034	Point 17	409.998	140.347	249.274	no cnx
2020_07_09_exp3_TH	Tlx3	ChrimsonR_kv_eyfp_AAV	1	pyramidal	2	198	257.034	Point 16	494.107	136.596	249.274	no cnx
2020_07_09_exp3_TH	Tlx3	ChrimsonR_kv_eyfp_AAV	1	pyramidal	2	198	257.034	Point 19	408.052	192.336	240.964	no cnx
2020_07_09_exp3_TH	Tlx3	ChrimsonR_kv_eyfp_AAV	1	pyramidal	2	198	257.034	Point 18	452.78	39.1016	249.274	no cnx
2020_07_09_exp3_TH	Tlx3	ChrimsonR_kv_eyfp_AAV	1	pyramidal	2	198	257.034	Point 31	577.179	240.271	200.614	no cnx
2020_07_09_exp3_TH	Tlx3	ChrimsonR_kv_eyfp_AAV	1	pyramidal	2	198	257.034	Point 30	521.406	269.985	200.614	no cnx
2020_07_09_exp3_TH	Tlx3	ChrimsonR_kv_eyfp_AAV	1	pyramidal	2	198	257.034	Point 37	424.138	226.118	195.124	no cnx
2020_07_09_exp3_TH	Tlx3	ChrimsonR_kv_eyfp_AAV	1	pyramidal	2	198	257.034	Point 36	439.277	219.13	202.234	excitatory	0.866704
2020_07_09_exp3_TH	Tlx3	ChrimsonR_kv_eyfp_AAV	1	pyramidal	2	198	257.034	Point 35	462.598	289.527	200.614	no cnx
2020_07_09_exp3_TH	Tlx3	ChrimsonR_kv_eyfp_AAV	1	pyramidal	2	198	257.034	Point 34	454.694	272.237	200.614	no cnx
2020_07_09_exp3_TH	Tlx3	ChrimsonR_kv_eyfp_AAV	1	pyramidal	2	198	257.034	Point 5	504.727	22.3592	270.114	no cnx
2020_07_09_exp3_TH	Tlx3	ChrimsonR_kv_eyfp_AAV	1	pyramidal	2	198	257.034	Point 4	475.327	-0.811846	270.114	no cnx
2020_07_09_exp3_TH	Tlx3	ChrimsonR_kv_eyfp_AAV	1	pyramidal	2	198	257.034	Point 7	545.821	106.118	265.464	no cnx
2020_07_09_exp3_TH	Tlx3	ChrimsonR_kv_eyfp_AAV	1	pyramidal	2	198	257.034	Point 6	452.921	91.5483	265.464	no cnx
2020_07_09_exp3_TH	Tlx3	ChrimsonR_kv_eyfp_AAV	1	pyramidal	2	198	257.034	Point 1	414.985	58.7714	270.114	no cnx
2020_07_09_exp3_TH	Tlx3	ChrimsonR_kv_eyfp_AAV	1	pyramidal	2	198	257.034	Point 3	454.404	113.057	270.114	no cnx
2020_07_09_exp3_TH	Tlx3	ChrimsonR_kv_eyfp_AAV	1	pyramidal	2	198	257.034	Point 2	476.789	-8.50052	270.114	no cnx
2020_07_09_exp3_TH	Tlx3	ChrimsonR_kv_eyfp_AAV	1	pyramidal	2	198	257.034	Point 9	548.849	83.0098	265.484	no cnx
2020_07_09_exp3_TH	Tlx3	ChrimsonR_kv_eyfp_AAV	1	pyramidal	2	198	257.034	Point 8	474.289	-32.2118	265.484	no cnx
2020_07_09_exp3_TH	Tlx3	ChrimsonR_kv_eyfp_AAV	1	pyramidal	2	198	257.034	Point 32	423.534	282.153	200.614	no cnx
2020_07_09_exp3_TH	Tlx3	ChrimsonR_kv_eyfp_AAV	1	pyramidal	2	198	257.034	Point 40	536.201	297.065	210.784	no cnx
2020_07_09_exp3_TH	Tlx3	ChrimsonR_kv_eyfp_AAV	1	pyramidal	2	198	257.034	Point 41	463.826	301.264	210.784	no cnx
2020_07_09_exp3_TH	Tlx3	ChrimsonR_kv_eyfp_AAV	1	pyramidal	2	198	257.034	Point 28	429.385	143.649	234.144	no cnx
2020_07_09_exp3_TH	Tlx3	ChrimsonR_kv_eyfp_AAV	1	pyramidal	2	198	257.034	Point 29	427.404	255.052	200.614	no cnx
2020_07_09_exp3_TH	Tlx3	ChrimsonR_kv_eyfp_AAV	1	pyramidal	2	198	257.034	Point 20	443.455	111.262	240.964	no cnx
2020_07_09_exp3_TH	Tlx3	ChrimsonR_kv_eyfp_AAV	1	pyramidal	2	198	257.034	Point 21	490.66	26.5395	240.964	no cnx
2020_07_09_exp3_TH	Tlx3	ChrimsonR_kv_eyfp_AAV	1	pyramidal	2	198	257.034	Point 22	522.531	46.8924	240.964	no cnx
2020_07_09_exp3_TH	Tlx3	ChrimsonR_kv_eyfp_AAV	1	pyramidal	2	198	257.034	Point 23	583.25	79.1032	240.964	no cnx
2020_07_09_exp3_TH	Tlx3	ChrimsonR_kv_eyfp_AAV	1	pyramidal	2	198	257.034	Point 24	505.528	70.5913	240.964	no cnx
2020_07_09_exp3_TH	Tlx3	ChrimsonR_kv_eyfp_AAV	1	pyramidal	2	198	257.034	Point 25	436.042	-64.3572	240.964	no cnx
2020_07_09_exp3_TH	Tlx3	ChrimsonR_kv_eyfp_AAV	1	pyramidal	2	198	257.034	Point 26	497.125	94.3239	240.964	no cnx
2020_07_09_exp3_TH	Tlx3	ChrimsonR_kv_eyfp_AAV	1	pyramidal	2	198	257.034	Point 27	385.021	185.716	234.144	no cnx
2020_07_09_exp3_TH	Tlx3	ChrimsonR_kv_eyfp_AAV	1	pyramidal	2	198	257.034	Point 39	500.826	247.304	210.784	no cnx
2020_07_09_exp3_TH	Tlx3	ChrimsonR_kv_eyfp_AAV	1	pyramidal	2	198	257.034	Point 33	435.981	229.006	200.614	excitatory	0.884682
2020_07_09_exp3_TH	Tlx3	ChrimsonR_kv_eyfp_AAV	1	pyramidal	2	198	257.034	Point 38	444.841	226.605	190.544	excitatory	0.841843
2020_07_09_exp3_TH	Tlx3	ChrimsonR_kv_eyfp_AAV	0	pyramidal	2	209	291.684	Point 11	524.539	223.5	260.494	no cnx
2020_07_09_exp3_TH	Tlx3	ChrimsonR_kv_eyfp_AAV	0	pyramidal	2	209	291.684	Point 10	574.454	250.573	265.484	no cnx
2020_07_09_exp3_TH	Tlx3	ChrimsonR_kv_eyfp_AAV	0	pyramidal	2	209	291.684	Point 13	562.13	58.1831	260.494	no cnx
2020_07_09_exp3_TH	Tlx3	ChrimsonR_kv_eyfp_AAV	0	pyramidal	2	209	291.684	Point 12	559.736	34.9054	260.494	no cnx
2020_07_09_exp3_TH	Tlx3	ChrimsonR_kv_eyfp_AAV	0	pyramidal	2	209	291.684	Point 15	468.005	121.942	249.274	no cnx
2020_07_09_exp3_TH	Tlx3	ChrimsonR_kv_eyfp_AAV	0	pyramidal	2	209	291.684	Point 14	533.472	24.3157	260.494	no cnx
2020_07_09_exp3_TH	Tlx3	ChrimsonR_kv_eyfp_AAV	0	pyramidal	2	209	291.684	Point 17	413.086	251.168	249.274	no cnx
2020_07_09_exp3_TH	Tlx3	ChrimsonR_kv_eyfp_AAV	0	pyramidal	2	209	291.684	Point 16	497.195	247.417	249.274	no cnx
2020_07_09_exp3_TH	Tlx3	ChrimsonR_kv_eyfp_AAV	0	pyramidal	2	209	291.684	Point 19	411.141	303.157	240.964	no cnx
2020_07_09_exp3_TH	Tlx3	ChrimsonR_kv_eyfp_AAV	0	pyramidal	2	209	291.684	Point 18	455.869	149.922	249.274	no cnx
2020_07_09_exp3_TH	Tlx3	ChrimsonR_kv_eyfp_AAV	0	pyramidal	2	209	291.684	Point 31	580.268	351.092	200.614	no cnx
2020_07_09_exp3_TH	Tlx3	ChrimsonR_kv_eyfp_AAV	0	pyramidal	2	209	291.684	Point 30	524.494	380.806	200.614	no cnx
2020_07_09_exp3_TH	Tlx3	ChrimsonR_kv_eyfp_AAV	0	pyramidal	2	209	291.684	Point 37	427.226	336.939	195.124	no cnx
2020_07_09_exp3_TH	Tlx3	ChrimsonR_kv_eyfp_AAV	0	pyramidal	2	209	291.684	Point 36	442.366	329.951	202.234	no cnx
2020_07_09_exp3_TH	Tlx3	ChrimsonR_kv_eyfp_AAV	0	pyramidal	2	209	291.684	Point 35	465.686	400.348	200.614	no cnx
2020_07_09_exp3_TH	Tlx3	ChrimsonR_kv_eyfp_AAV	0	pyramidal	2	209	291.684	Point 34	457.782	383.058	200.614	no cnx
2020_07_09_exp3_TH	Tlx3	ChrimsonR_kv_eyfp_AAV	0	pyramidal	2	209	291.684	Point 5	507.816	133.18	270.114	no cnx
2020_07_09_exp3_TH	Tlx3	ChrimsonR_kv_eyfp_AAV	0	pyramidal	2	209	291.684	Point 4	478.416	110.009	270.114	no cnx
2020_07_09_exp3_TH	Tlx3	ChrimsonR_kv_eyfp_AAV	0	pyramidal	2	209	291.684	Point 7	548.909	216.939	265.464	no cnx
2020_07_09_exp3_TH	Tlx3	ChrimsonR_kv_eyfp_AAV	0	pyramidal	2	209	291.684	Point 6	456.01	202.369	265.464	no cnx
2020_07_09_exp3_TH	Tlx3	ChrimsonR_kv_eyfp_AAV	0	pyramidal	2	209	291.684	Point 1	418.073	169.592	270.114	no cnx
2020_07_09_exp3_TH	Tlx3	ChrimsonR_kv_eyfp_AAV	0	pyramidal	2	209	291.684	Point 3	457.492	223.878	270.114	no cnx
2020_07_09_exp3_TH	Tlx3	ChrimsonR_kv_eyfp_AAV	0	pyramidal	2	209	291.684	Point 2	479.877	102.32	270.114	no cnx
2020_07_09_exp3_TH	Tlx3	ChrimsonR_kv_eyfp_AAV	0	pyramidal	2	209	291.684	Point 9	551.937	193.831	265.484	no cnx
2020_07_09_exp3_TH	Tlx3	ChrimsonR_kv_eyfp_AAV	0	pyramidal	2	209	291.684	Point 8	477.378	78.609	265.484	no cnx
2020_07_09_exp3_TH	Tlx3	ChrimsonR_kv_eyfp_AAV	0	pyramidal	2	209	291.684	Point 32	426.622	392.974	200.614	no cnx
2020_07_09_exp3_TH	Tlx3	ChrimsonR_kv_eyfp_AAV	0	pyramidal	2	209	291.684	Point 40	539.289	407.886	210.784	no cnx
2020_07_09_exp3_TH	Tlx3	ChrimsonR_kv_eyfp_AAV	0	pyramidal	2	209	291.684	Point 41	466.915	412.084	210.784	no cnx
2020_07_09_exp3_TH	Tlx3	ChrimsonR_kv_eyfp_AAV	0	pyramidal	2	209	291.684	Point 28	432.473	254.469	234.144	no cnx
2020_07_09_exp3_TH	Tlx3	ChrimsonR_kv_eyfp_AAV	0	pyramidal	2	209	291.684	Point 29	430.493	365.873	200.614	no cnx
2020_07_09_exp3_TH	Tlx3	ChrimsonR_kv_eyfp_AAV	0	pyramidal	2	209	291.684	Point 20	446.544	222.083	240.964	no cnx
2020_07_09_exp3_TH	Tlx3	ChrimsonR_kv_eyfp_AAV	0	pyramidal	2	209	291.684	Point 21	493.748	137.36	240.964	no cnx
2020_07_09_exp3_TH	Tlx3	ChrimsonR_kv_eyfp_AAV	0	pyramidal	2	209	291.684	Point 22	525.619	157.713	240.964	no cnx
2020_07_09_exp3_TH	Tlx3	ChrimsonR_kv_eyfp_AAV	0	pyramidal	2	209	291.684	Point 23	586.339	189.924	240.964	no cnx
2020_07_09_exp3_TH	Tlx3	ChrimsonR_kv_eyfp_AAV	0	pyramidal	2	209	291.684	Point 24	508.616	181.412	240.964	no cnx
2020_07_09_exp3_TH	Tlx3	ChrimsonR_kv_eyfp_AAV	0	pyramidal	2	209	291.684	Point 25	439.131	46.4636	240.964	no cnx
2020_07_09_exp3_TH	Tlx3	ChrimsonR_kv_eyfp_AAV	0	pyramidal	2	209	291.684	Point 26	500.213	205.145	240.964	no cnx
2020_07_09_exp3_TH	Tlx3	ChrimsonR_kv_eyfp_AAV	0	pyramidal	2	209	291.684	Point 27	388.11	296.537	234.144	no cnx
2020_07_09_exp3_TH	Tlx3	ChrimsonR_kv_eyfp_AAV	0	pyramidal	2	209	291.684	Point 39	503.914	358.125	210.784	no cnx
2020_07_09_exp3_TH	Tlx3	ChrimsonR_kv_eyfp_AAV	0	pyramidal	2	209	291.684	Point 33	439.069	339.827	200.614	no cnx
2020_07_09_exp3_TH	Tlx3	ChrimsonR_kv_eyfp_AAV	0	pyramidal	2	209	291.684	Point 38	447.929	337.426	190.544	no cnx
2020_07_09_exp2_TH	Tlx3	ChrimsonR_kv_eyfp_AAV	1	pyramidal	2	164	202	Point 5	389.44	231.649	197.044	no cnx
2020_07_09_exp2_TH	Tlx3	ChrimsonR_kv_eyfp_AAV	1	pyramidal	2	164	202	Point 4	507.742	177.984	197.044	no cnx
2020_07_09_exp2_TH	Tlx3	ChrimsonR_kv_eyfp_AAV	1	pyramidal	2	164	202	Point 7	534.334	236.359	197.044	no cnx
2020_07_09_exp2_TH	Tlx3	ChrimsonR_kv_eyfp_AAV	1	pyramidal	2	164	202	Point 6	465.265	307.108	197.044	no cnx
2020_07_09_exp2_TH	Tlx3	ChrimsonR_kv_eyfp_AAV	1	pyramidal	2	164	202	Point 1	368.11	231.384	197.044	no cnx
2020_07_09_exp2_TH	Tlx3	ChrimsonR_kv_eyfp_AAV	1	pyramidal	2	164	202	Point 3	409.709	251.493	197.044	no cnx
2020_07_09_exp2_TH	Tlx3	ChrimsonR_kv_eyfp_AAV	1	pyramidal	2	164	202	Point 2	449.294	190.3	197.044	no cnx
2020_07_09_exp2_TH	Tlx3	ChrimsonR_kv_eyfp_AAV	1	pyramidal	2	164	202	Point 9	441.851	181.568	190.724	no cnx
2020_07_09_exp2_TH	Tlx3	ChrimsonR_kv_eyfp_AAV	1	pyramidal	2	164	202	Point 8	406.045	134.824	190.724	excitatory	0.236699
2020_07_09_exp2_TH	Tlx3	ChrimsonR_kv_eyfp_AAV	1	pyramidal	2	164	202	Point 11	416.382	313.149	190.724	no cnx
2020_07_09_exp2_TH	Tlx3	ChrimsonR_kv_eyfp_AAV	1	pyramidal	2	164	202	Point 10	444.372	211.433	190.724	no cnx
2020_07_09_exp2_TH	Tlx3	ChrimsonR_kv_eyfp_AAV	1	pyramidal	2	164	202	Point 13	415.904	297.987	190.724	no cnx
2020_07_09_exp2_TH	Tlx3	ChrimsonR_kv_eyfp_AAV	1	pyramidal	2	164	202	Point 12	363.444	273.694	190.724	no cnx
2020_07_09_exp2_TH	Tlx3	ChrimsonR_kv_eyfp_AAV	1	pyramidal	2	164	202	Point 15	523.231	196.25	190.724	no cnx
2020_07_09_exp2_TH	Tlx3	ChrimsonR_kv_eyfp_AAV	1	pyramidal	2	164	202	Point 17	399.533	125.109	192.594	excitatory	0.0882412
2020_07_09_exp2_TH	Tlx3	ChrimsonR_kv_eyfp_AAV	1	pyramidal	2	164	202	Point 16	353.944	325.571	190.724	no cnx
2020_07_09_exp2_TH	Tlx3	ChrimsonR_kv_eyfp_AAV	1	pyramidal	2	164	202	Point 19	375.804	171.473	205.219	no cnx
2020_07_09_exp2_TH	Tlx3	ChrimsonR_kv_eyfp_AAV	1	pyramidal	2	164	202	Point 18	416.26	149.182	205.284	no cnx
2020_07_09_exp2_TH	Tlx3	ChrimsonR_kv_eyfp_AAV	1	pyramidal	2	164	202	Point 20	404.114	153.037	205.284	no cnx
2020_07_09_exp2_TH	Tlx3	ChrimsonR_kv_eyfp_AAV	1	pyramidal	2	164	202	Point 22	357.113	136.714	205.219	no cnx
2020_07_09_exp2_TH	Tlx3	ChrimsonR_kv_eyfp_AAV	0	pyramidal	2	215	202	Point 5	388.767	302.051	197.044	no cnx
2020_07_09_exp2_TH	Tlx3	ChrimsonR_kv_eyfp_AAV	0	pyramidal	2	215	202	Point 4	507.069	248.386	197.044	no cnx
2020_07_09_exp2_TH	Tlx3	ChrimsonR_kv_eyfp_AAV	0	pyramidal	2	215	202	Point 7	533.661	306.761	197.044	no cnx
2020_07_09_exp2_TH	Tlx3	ChrimsonR_kv_eyfp_AAV	0	pyramidal	2	215	202	Point 6	464.593	377.51	197.044	no cnx
2020_07_09_exp2_TH	Tlx3	ChrimsonR_kv_eyfp_AAV	0	pyramidal	2	215	202	Point 1	367.437	301.786	197.044	no cnx
2020_07_09_exp2_TH	Tlx3	ChrimsonR_kv_eyfp_AAV	0	pyramidal	2	215	202	Point 3	409.037	321.896	197.044	no cnx
2020_07_09_exp2_TH	Tlx3	ChrimsonR_kv_eyfp_AAV	0	pyramidal	2	215	202	Point 2	448.622	260.702	197.044	no cnx
2020_07_09_exp2_TH	Tlx3	ChrimsonR_kv_eyfp_AAV	0	pyramidal	2	215	202	Point 21	368.706	219.956	205.219	no cnx
2020_07_09_exp2_TH	Tlx3	ChrimsonR_kv_eyfp_AAV	0	pyramidal	2	215	202	Point 9	441.178	251.97	190.724	no cnx
2020_07_09_exp2_TH	Tlx3	ChrimsonR_kv_eyfp_AAV	0	pyramidal	2	215	202	Point 8	405.373	205.226	190.724	no cnx
2020_07_09_exp2_TH	Tlx3	ChrimsonR_kv_eyfp_AAV	0	pyramidal	2	215	202	Point 11	415.709	383.551	190.724	no cnx
2020_07_09_exp2_TH	Tlx3	ChrimsonR_kv_eyfp_AAV	0	pyramidal	2	215	202	Point 10	443.699	281.835	190.724	no cnx
2020_07_09_exp2_TH	Tlx3	ChrimsonR_kv_eyfp_AAV	0	pyramidal	2	215	202	Point 13	415.232	368.389	190.724	no cnx
2020_07_09_exp2_TH	Tlx3	ChrimsonR_kv_eyfp_AAV	0	pyramidal	2	215	202	Point 12	362.772	344.096	190.724	no cnx
2020_07_09_exp2_TH	Tlx3	ChrimsonR_kv_eyfp_AAV	0	pyramidal	2	215	202	Point 15	522.558	266.652	190.724	no cnx
2020_07_09_exp2_TH	Tlx3	ChrimsonR_kv_eyfp_AAV	0	pyramidal	2	215	202	Point 17	398.86	195.511	192.594	no cnx
2020_07_09_exp2_TH	Tlx3	ChrimsonR_kv_eyfp_AAV	0	pyramidal	2	215	202	Point 16	353.272	395.974	190.724	no cnx
2020_07_09_exp2_TH	Tlx3	ChrimsonR_kv_eyfp_AAV	0	pyramidal	2	215	202	Point 19	375.131	241.875	205.219	no cnx
2020_07_09_exp2_TH	Tlx3	ChrimsonR_kv_eyfp_AAV	0	pyramidal	2	215	202	Point 18	415.588	219.584	205.284	excitatory	0.139844
2020_07_09_exp2_TH	Tlx3	ChrimsonR_kv_eyfp_AAV	0	pyramidal	2	215	202	Point 20	403.442	223.439	205.284	excitatory	0.158077
2020_07_09_exp2_TH	Tlx3	ChrimsonR_kv_eyfp_AAV	0	pyramidal	2	215	202	Point 22	356.441	207.116	205.219	no cnx
2020_07_09_exp1_TH	Tlx3	ChrimsonR_kv_eyfp_AAV	1	pyramidal	2	210	177.734	Point 11	443.004	144.611	179.794	no cnx
2020_07_09_exp1_TH	Tlx3	ChrimsonR_kv_eyfp_AAV	1	pyramidal	2	210	177.734	Point 10	490.678	113.706	179.794	no cnx
2020_07_09_exp1_TH	Tlx3	ChrimsonR_kv_eyfp_AAV	1	pyramidal	2	210	177.734	Point 13	357.929	103.542	189.024	no cnx
2020_07_09_exp1_TH	Tlx3	ChrimsonR_kv_eyfp_AAV	1	pyramidal	2	210	177.734	Point 12	415.852	-108.888	179.794	no cnx
2020_07_09_exp1_TH	Tlx3	ChrimsonR_kv_eyfp_AAV	1	pyramidal	2	210	177.734	Point 15	385.727	110.723	189.024	no cnx
2020_07_09_exp1_TH	Tlx3	ChrimsonR_kv_eyfp_AAV	1	pyramidal	2	210	177.734	Point 14	362.085	134.148	189.024	no cnx
2020_07_09_exp1_TH	Tlx3	ChrimsonR_kv_eyfp_AAV	1	pyramidal	2	210	177.734	Point 17	311.906	94.9923	195.994	no cnx
2020_07_09_exp1_TH	Tlx3	ChrimsonR_kv_eyfp_AAV	1	pyramidal	2	210	177.734	Point 16	379.802	140.883	189.024	no cnx
2020_07_09_exp1_TH	Tlx3	ChrimsonR_kv_eyfp_AAV	1	pyramidal	2	210	177.734	Point 19	365.748	87.0636	195.994	no cnx
2020_07_09_exp1_TH	Tlx3	ChrimsonR_kv_eyfp_AAV	1	pyramidal	2	210	177.734	Point 18	345.397	110.505	195.994	no cnx
2020_07_09_exp1_TH	Tlx3	ChrimsonR_kv_eyfp_AAV	1	pyramidal	2	210	177.734	Point 30	340.89	42.3358	152.119	excitatory	0.160195
2020_07_09_exp1_TH	Tlx3	ChrimsonR_kv_eyfp_AAV	1	pyramidal	2	210	177.734	Point 5	366.85	-0.914568	179.294	no cnx
2020_07_09_exp1_TH	Tlx3	ChrimsonR_kv_eyfp_AAV	1	pyramidal	2	210	177.734	Point 4	429.629	83.9324	179.294	no cnx
2020_07_09_exp1_TH	Tlx3	ChrimsonR_kv_eyfp_AAV	1	pyramidal	2	210	177.734	Point 7	461.41	-36.7964	179.794	no cnx
2020_07_09_exp1_TH	Tlx3	ChrimsonR_kv_eyfp_AAV	1	pyramidal	2	210	177.734	Point 6	393.591	75.5756	179.294	no cnx
2020_07_09_exp1_TH	Tlx3	ChrimsonR_kv_eyfp_AAV	1	pyramidal	2	210	177.734	Point 1	322.92	7.83424	179.294	no cnx
2020_07_09_exp1_TH	Tlx3	ChrimsonR_kv_eyfp_AAV	1	pyramidal	2	210	177.734	Point 3	393.907	7.80134	179.294	no cnx
2020_07_09_exp1_TH	Tlx3	ChrimsonR_kv_eyfp_AAV	1	pyramidal	2	210	177.734	Point 2	381.477	68.7668	179.294	no cnx
2020_07_09_exp1_TH	Tlx3	ChrimsonR_kv_eyfp_AAV	1	pyramidal	2	210	177.734	Point 9	339.342	80.5764	165.604	excitatory	2.14829
2020_07_09_exp1_TH	Tlx3	ChrimsonR_kv_eyfp_AAV	1	pyramidal	2	210	177.734	Point 8	398.228	-3.70738	179.794	no cnx
2020_07_09_exp1_TH	Tlx3	ChrimsonR_kv_eyfp_AAV	1	pyramidal	2	210	177.734	Point 28	343.306	102.953	158.424	no cnx
2020_07_09_exp1_TH	Tlx3	ChrimsonR_kv_eyfp_AAV	1	pyramidal	2	210	177.734	Point 29	351.903	91.56	158.424	no cnx
2020_07_09_exp1_TH	Tlx3	ChrimsonR_kv_eyfp_AAV	1	pyramidal	2	210	177.734	Point 20	373.337	119.378	195.994	no cnx
2020_07_09_exp1_TH	Tlx3	ChrimsonR_kv_eyfp_AAV	1	pyramidal	2	210	177.734	Point 21	383.455	51.5269	168.334	no cnx
2020_07_09_exp1_TH	Tlx3	ChrimsonR_kv_eyfp_AAV	1	pyramidal	2	210	177.734	Point 22	386.591	112.428	168.334	no cnx
2020_07_09_exp1_TH	Tlx3	ChrimsonR_kv_eyfp_AAV	1	pyramidal	2	210	177.734	Point 23	357.059	156.014	168.334	no cnx
2020_07_09_exp1_TH	Tlx3	ChrimsonR_kv_eyfp_AAV	1	pyramidal	2	210	177.734	Point 24	405.001	72.545	168.334	no cnx
2020_07_09_exp1_TH	Tlx3	ChrimsonR_kv_eyfp_AAV	1	pyramidal	2	210	177.734	Point 25	406.478	112.735	168.334	no cnx
2020_07_09_exp1_TH	Tlx3	ChrimsonR_kv_eyfp_AAV	1	pyramidal	2	210	177.734	Point 26	345.446	34.4678	195.454	no cnx
2020_07_09_exp1_TH	Tlx3	ChrimsonR_kv_eyfp_AAV	1	pyramidal	2	210	177.734	Point 27	379.178	78.5447	195.454	no cnx
2020_07_03_exp5_TH	Tlx3	ChrimsonR_kv_eyfp_AAV	1	pyramidal	2	140	284.154	Point 11	399.975	-18.1545	317.964	no cnx
2020_07_03_exp5_TH	Tlx3	ChrimsonR_kv_eyfp_AAV	1	pyramidal	2	140	284.154	Point 10	451.797	49.3521	317.964	no cnx
2020_07_03_exp5_TH	Tlx3	ChrimsonR_kv_eyfp_AAV	1	pyramidal	2	140	284.154	Point 13	451.919	76.0524	317.964	no cnx
2020_07_03_exp5_TH	Tlx3	ChrimsonR_kv_eyfp_AAV	1	pyramidal	2	140	284.154	Point 12	484.302	29.4938	317.964	no cnx
2020_07_03_exp5_TH	Tlx3	ChrimsonR_kv_eyfp_AAV	1	pyramidal	2	140	284.154	Point 15	432.487	223.712	317.964	no cnx
2020_07_03_exp5_TH	Tlx3	ChrimsonR_kv_eyfp_AAV	1	pyramidal	2	140	284.154	Point 14	462.913	104.045	317.964	no cnx
2020_07_03_exp5_TH	Tlx3	ChrimsonR_kv_eyfp_AAV	1	pyramidal	2	140	284.154	Point 17	414.985	300.825	358.964	no cnx
2020_07_03_exp5_TH	Tlx3	ChrimsonR_kv_eyfp_AAV	1	pyramidal	2	140	284.154	Point 16	457.685	183.718	317.964	no cnx
2020_07_03_exp5_TH	Tlx3	ChrimsonR_kv_eyfp_AAV	1	pyramidal	2	140	284.154	Point 19	413.605	193.99	358.964	no cnx
2020_07_03_exp5_TH	Tlx3	ChrimsonR_kv_eyfp_AAV	1	pyramidal	2	140	284.154	Point 18	453.066	236.281	358.964	no cnx
2020_07_03_exp5_TH	Tlx3	ChrimsonR_kv_eyfp_AAV	1	pyramidal	2	140	284.154	Point 31	512.827	299.861	361.544	no cnx
2020_07_03_exp5_TH	Tlx3	ChrimsonR_kv_eyfp_AAV	1	pyramidal	2	140	284.154	Point 30	441.608	374.391	361.544	no cnx
2020_07_03_exp5_TH	Tlx3	ChrimsonR_kv_eyfp_AAV	1	pyramidal	2	140	284.154	Point 37	427.342	-61.8317	401.844	no cnx
2020_07_03_exp5_TH	Tlx3	ChrimsonR_kv_eyfp_AAV	1	pyramidal	2	140	284.154	Point 36	466.646	-79.9783	401.844	no cnx
2020_07_03_exp5_TH	Tlx3	ChrimsonR_kv_eyfp_AAV	1	pyramidal	2	140	284.154	Point 35	449.003	-75.2716	410.604	no cnx
2020_07_03_exp5_TH	Tlx3	ChrimsonR_kv_eyfp_AAV	1	pyramidal	2	140	284.154	Point 34	365.905	-259.964	410.604	no cnx
2020_07_03_exp5_TH	Tlx3	ChrimsonR_kv_eyfp_AAV	1	pyramidal	2	140	284.154	Point 5	474.163	132.482	322.074	no cnx
2020_07_03_exp5_TH	Tlx3	ChrimsonR_kv_eyfp_AAV	1	pyramidal	2	140	284.154	Point 4	482.728	66.9289	322.074	no cnx
2020_07_03_exp5_TH	Tlx3	ChrimsonR_kv_eyfp_AAV	1	pyramidal	2	140	284.154	Point 7	481.817	151.444	322.074	no cnx
2020_07_03_exp5_TH	Tlx3	ChrimsonR_kv_eyfp_AAV	1	pyramidal	2	140	284.154	Point 6	453.964	146.437	322.074	no cnx
2020_07_03_exp5_TH	Tlx3	ChrimsonR_kv_eyfp_AAV	1	pyramidal	2	140	284.154	Point 1	422.748	27.2593	322.074	no cnx
2020_07_03_exp5_TH	Tlx3	ChrimsonR_kv_eyfp_AAV	1	pyramidal	2	140	284.154	Point 3	444.809	187.793	322.074	no cnx
2020_07_03_exp5_TH	Tlx3	ChrimsonR_kv_eyfp_AAV	1	pyramidal	2	140	284.154	Point 2	424.599	72.6038	322.074	no cnx
2020_07_03_exp5_TH	Tlx3	ChrimsonR_kv_eyfp_AAV	1	pyramidal	2	140	284.154	Point 9	434.222	106.86	317.964	no cnx
2020_07_03_exp5_TH	Tlx3	ChrimsonR_kv_eyfp_AAV	1	pyramidal	2	140	284.154	Point 8	397.077	19.4705	322.074	no cnx
2020_07_03_exp5_TH	Tlx3	ChrimsonR_kv_eyfp_AAV	1	pyramidal	2	140	284.154	Point 32	370.657	-104.383	410.604	no cnx
2020_07_03_exp5_TH	Tlx3	ChrimsonR_kv_eyfp_AAV	1	pyramidal	2	140	284.154	Point 40	361.773	-195.586	401.844	no cnx
2020_07_03_exp5_TH	Tlx3	ChrimsonR_kv_eyfp_AAV	1	pyramidal	2	140	284.154	Point 41	438.938	-44.4255	401.844	no cnx
2020_07_03_exp5_TH	Tlx3	ChrimsonR_kv_eyfp_AAV	1	pyramidal	2	140	284.154	Point 28	427.319	164.639	361.544	no cnx
2020_07_03_exp5_TH	Tlx3	ChrimsonR_kv_eyfp_AAV	1	pyramidal	2	140	284.154	Point 29	458.529	348.398	361.544	no cnx
2020_07_03_exp5_TH	Tlx3	ChrimsonR_kv_eyfp_AAV	1	pyramidal	2	140	284.154	Point 20	381.039	296.632	358.964	no cnx
2020_07_03_exp5_TH	Tlx3	ChrimsonR_kv_eyfp_AAV	1	pyramidal	2	140	284.154	Point 21	467.814	307.602	358.964	no cnx
2020_07_03_exp5_TH	Tlx3	ChrimsonR_kv_eyfp_AAV	1	pyramidal	2	140	284.154	Point 22	447.807	254.082	358.964	no cnx
2020_07_03_exp5_TH	Tlx3	ChrimsonR_kv_eyfp_AAV	1	pyramidal	2	140	284.154	Point 23	442.5	278.013	358.964	no cnx
2020_07_03_exp5_TH	Tlx3	ChrimsonR_kv_eyfp_AAV	1	pyramidal	2	140	284.154	Point 24	487.447	368.524	358.964	no cnx
2020_07_03_exp5_TH	Tlx3	ChrimsonR_kv_eyfp_AAV	1	pyramidal	2	140	284.154	Point 25	467.344	362.93	361.544	no cnx
2020_07_03_exp5_TH	Tlx3	ChrimsonR_kv_eyfp_AAV	1	pyramidal	2	140	284.154	Point 26	418.673	286.703	361.544	no cnx
2020_07_03_exp5_TH	Tlx3	ChrimsonR_kv_eyfp_AAV	1	pyramidal	2	140	284.154	Point 27	450.602	222.823	361.544	no cnx
2020_07_03_exp5_TH	Tlx3	ChrimsonR_kv_eyfp_AAV	1	pyramidal	2	140	284.154	Point 39	370.434	-125.328	401.844	no cnx
2020_07_03_exp5_TH	Tlx3	ChrimsonR_kv_eyfp_AAV	1	pyramidal	2	140	284.154	Point 33	407.878	-153.501	410.604	no cnx
2020_07_03_exp5_TH	Tlx3	ChrimsonR_kv_eyfp_AAV	1	pyramidal	2	140	284.154	Point 38	396.469	-123.743	401.844	no cnx
2020_07_03_exp4_TH	Tlx3	ChrimsonR_kv_eyfp_AAV	0	pyramidal	2	203	242.784	Point 5	471.142	294.241	288.884	no cnx
2020_07_03_exp4_TH	Tlx3	ChrimsonR_kv_eyfp_AAV	0	pyramidal	2	203	242.784	Point 4	518.901	126.599	288.884	no cnx
2020_07_03_exp4_TH	Tlx3	ChrimsonR_kv_eyfp_AAV	0	pyramidal	2	203	242.784	Point 7	532.455	232.271	288.884	no cnx
2020_07_03_exp4_TH	Tlx3	ChrimsonR_kv_eyfp_AAV	0	pyramidal	2	203	242.784	Point 6	474.718	66.1792	288.884	no cnx
2020_07_03_exp4_TH	Tlx3	ChrimsonR_kv_eyfp_AAV	0	pyramidal	2	203	242.784	Point 1	414.893	200.954	288.884	no cnx
2020_07_03_exp4_TH	Tlx3	ChrimsonR_kv_eyfp_AAV	0	pyramidal	2	203	242.784	Point 3	382.255	161.829	288.884	no cnx
2020_07_03_exp4_TH	Tlx3	ChrimsonR_kv_eyfp_AAV	0	pyramidal	2	203	242.784	Point 2	439.234	317.759	288.884	no cnx
2020_07_03_exp4_TH	Tlx3	ChrimsonR_kv_eyfp_AAV	0	pyramidal	2	203	242.784	Point 8	606.747	284.053	288.884	no cnx
2020_07_03_exp3_TH	Rorb	ChrimsonR_kv_eyfp_AAV	1	pyramidal	2	220	242.974	Point 11	365.508	179.941	268.554	no cnx
2020_07_03_exp3_TH	Rorb	ChrimsonR_kv_eyfp_AAV	1	pyramidal	2	220	242.974	Point 10	339.62	137.405	268.554	no cnx
2020_07_03_exp3_TH	Rorb	ChrimsonR_kv_eyfp_AAV	1	pyramidal	2	220	242.974	Point 13	367.745	94.8584	268.554	no cnx
2020_07_03_exp3_TH	Rorb	ChrimsonR_kv_eyfp_AAV	1	pyramidal	2	220	242.974	Point 12	374.627	40.9906	268.554	no cnx
2020_07_03_exp3_TH	Rorb	ChrimsonR_kv_eyfp_AAV	1	pyramidal	2	220	242.974	Point 15	287.026	-7.20419	268.554	no cnx
2020_07_03_exp3_TH	Rorb	ChrimsonR_kv_eyfp_AAV	1	pyramidal	2	220	242.974	Point 14	298.716	43.9864	268.554	no cnx
2020_07_03_exp3_TH	Rorb	ChrimsonR_kv_eyfp_AAV	1	pyramidal	2	220	242.974	Point 17	404.018	34.6233	268.554	no cnx
2020_07_03_exp3_TH	Rorb	ChrimsonR_kv_eyfp_AAV	1	pyramidal	2	220	242.974	Point 16	303.469	22.1381	268.554	no cnx
2020_07_03_exp3_TH	Rorb	ChrimsonR_kv_eyfp_AAV	1	pyramidal	2	220	242.974	Point 19	327.655	-17.0761	268.554	no cnx
2020_07_03_exp3_TH	Rorb	ChrimsonR_kv_eyfp_AAV	1	pyramidal	2	220	242.974	Point 18	304.916	0.528655	268.554	excitatory	0.60053
2020_07_03_exp3_TH	Rorb	ChrimsonR_kv_eyfp_AAV	1	pyramidal	2	220	242.974	Point 5	325.035	129.281	287.084	no cnx
2020_07_03_exp3_TH	Rorb	ChrimsonR_kv_eyfp_AAV	1	pyramidal	2	220	242.974	Point 4	362.448	145.858	287.084	no cnx
2020_07_03_exp3_TH	Rorb	ChrimsonR_kv_eyfp_AAV	1	pyramidal	2	220	242.974	Point 7	307.917	35.252	268.554	no cnx
2020_07_03_exp3_TH	Rorb	ChrimsonR_kv_eyfp_AAV	1	pyramidal	2	220	242.974	Point 6	321.61	94.6436	287.084	no cnx
2020_07_03_exp3_TH	Rorb	ChrimsonR_kv_eyfp_AAV	1	pyramidal	2	220	242.974	Point 1	315.337	72.9485	287.084	no cnx
2020_07_03_exp3_TH	Rorb	ChrimsonR_kv_eyfp_AAV	1	pyramidal	2	220	242.974	Point 3	319.053	31.4714	287.084	no cnx
2020_07_03_exp3_TH	Rorb	ChrimsonR_kv_eyfp_AAV	1	pyramidal	2	220	242.974	Point 2	340.983	127.584	287.084	no cnx
2020_07_03_exp3_TH	Rorb	ChrimsonR_kv_eyfp_AAV	1	pyramidal	2	220	242.974	Point 9	339.374	98.7685	268.554	no cnx
2020_07_03_exp3_TH	Rorb	ChrimsonR_kv_eyfp_AAV	1	pyramidal	2	220	242.974	Point 8	314.088	57.0404	268.554	no cnx
2020_07_03_exp3_TH	Rorb	ChrimsonR_kv_eyfp_AAV	1	pyramidal	2	220	242.974	Point 20	374.965	-48.9157	268.554	no cnx
2020_07_03_exp3_TH	Rorb	ChrimsonR_kv_eyfp_AAV	1	pyramidal	2	220	242.974	Point 21	315.635	-2.26818	280.054	excitatory	0.213301
2020_07_03_exp3_TH	Rorb	ChrimsonR_kv_eyfp_AAV	1	pyramidal	2	220	242.974	Point 22	326.27	-11.9447	276.964	no cnx
2020_06_11_exp3_TH	Rorb	Ai167	3	pyramidal	2	227	-0.0861658	Point 11	398.33	-88.7203	37.684	no cnx
2020_06_11_exp3_TH	Rorb	Ai167	3	pyramidal	2	227	-0.0861658	Point 10	382.894	-266.544	24.604	no cnx
2020_06_11_exp3_TH	Rorb	Ai167	3	pyramidal	2	227	-0.0861658	Point 13	375.781	-90.6196	75.364	no cnx
2020_06_11_exp3_TH	Rorb	Ai167	3	pyramidal	2	227	-0.0861658	Point 12	445.367	-291.423	45.034	no cnx
2020_06_11_exp3_TH	Rorb	Ai167	3	pyramidal	2	227	-0.0861658	Point 15	706.885	75.3252	94.214	no cnx
2020_06_11_exp3_TH	Rorb	Ai167	3	pyramidal	2	227	-0.0861658	Point 14	681.47	9.7211	97.524	no cnx
2020_06_11_exp3_TH	Rorb	Ai167	3	pyramidal	2	227	-0.0861658	Point 17	692.171	-158.967	77.224	no cnx
2020_06_11_exp3_TH	Rorb	Ai167	3	pyramidal	2	227	-0.0861658	Point 16	697.767	-24.7216	82.664	no cnx
2020_06_11_exp3_TH	Rorb	Ai167	3	pyramidal	2	227	-0.0861658	Point 19	705.593	44.4332	49.024	no cnx
2020_06_11_exp3_TH	Rorb	Ai167	3	pyramidal	2	227	-0.0861658	Point 18	648.016	-128.088	66.934	no cnx
2020_06_11_exp3_TH	Rorb	Ai167	3	pyramidal	2	227	-0.0861658	Point 31	748.251	409.038	31.364	no cnx
2020_06_11_exp3_TH	Rorb	Ai167	3	pyramidal	2	227	-0.0861658	Point 30	612.678	335.494	41.234	no cnx
2020_06_11_exp3_TH	Rorb	Ai167	3	pyramidal	2	227	-0.0861658	Point 37	744.696	-556.786	107.514	no cnx
2020_06_11_exp3_TH	Rorb	Ai167	3	pyramidal	2	227	-0.0861658	Point 36	728.126	-398.252	107.514	no cnx
2020_06_11_exp3_TH	Rorb	Ai167	3	pyramidal	2	227	-0.0861658	Point 35	650.272	-339.609	108.584	no cnx
2020_06_11_exp3_TH	Rorb	Ai167	3	pyramidal	2	227	-0.0861658	Point 34	792.008	-265.056	108.584	no cnx
2020_06_11_exp3_TH	Rorb	Ai167	3	pyramidal	2	227	-0.0861658	Point 5	381.714	-35.3426	10.834	no cnx
2020_06_11_exp3_TH	Rorb	Ai167	3	pyramidal	2	227	-0.0861658	Point 4	401.317	193.629	10.834	no cnx
2020_06_11_exp3_TH	Rorb	Ai167	3	pyramidal	2	227	-0.0861658	Point 7	353.276	44.2475	-13.806	no cnx
2020_06_11_exp3_TH	Rorb	Ai167	3	pyramidal	2	227	-0.0861658	Point 6	382.848	180.231	-13.816	no cnx
2020_06_11_exp3_TH	Rorb	Ai167	3	pyramidal	2	227	-0.0861658	Point 1	392.973	56.4934	62.004	no cnx
2020_06_11_exp3_TH	Rorb	Ai167	3	pyramidal	2	227	-0.0861658	Point 3	372.05	-14.3805	16.304	no cnx
2020_06_11_exp3_TH	Rorb	Ai167	3	pyramidal	2	227	-0.0861658	Point 2	402.164	197.372	16.304	no cnx
2020_06_11_exp3_TH	Rorb	Ai167	3	pyramidal	2	227	-0.0861658	Point 9	476.212	-88.6345	24.604	no cnx
2020_06_11_exp3_TH	Rorb	Ai167	3	pyramidal	2	227	-0.0861658	Point 8	418.974	-136.51	-11.106	no cnx
2020_06_11_exp3_TH	Rorb	Ai167	3	pyramidal	2	227	-0.0861658	Point 32	785.336	-88.7129	59.134	no cnx
2020_06_11_exp3_TH	Rorb	Ai167	3	pyramidal	2	227	-0.0861658	Point 42	358.056	-65.2062	-24.656	no cnx
2020_06_11_exp3_TH	Rorb	Ai167	3	pyramidal	2	227	-0.0861658	Point 43	344.784	-3.15546	39.934	no cnx
2020_06_11_exp3_TH	Rorb	Ai167	3	pyramidal	2	227	-0.0861658	Point 40	624.661	-124.648	97.294	no cnx
2020_06_11_exp3_TH	Rorb	Ai167	3	pyramidal	2	227	-0.0861658	Point 41	620.947	-129.756	70.954	no cnx
2020_06_11_exp3_TH	Rorb	Ai167	3	pyramidal	2	227	-0.0861658	Point 44	186.468	74.955	31.094	no cnx
2020_06_11_exp3_TH	Rorb	Ai167	3	pyramidal	2	227	-0.0861658	Point 45	368.533	71.7422	89.544	no cnx
2020_06_11_exp3_TH	Rorb	Ai167	3	pyramidal	2	227	-0.0861658	Point 28	808.933	343.165	88.074	no cnx
2020_06_11_exp3_TH	Rorb	Ai167	3	pyramidal	2	227	-0.0861658	Point 29	760.019	315.718	53.054	no cnx
2020_06_11_exp3_TH	Rorb	Ai167	3	pyramidal	2	227	-0.0861658	Point 20	655.814	116.721	49.024	no cnx
2020_06_11_exp3_TH	Rorb	Ai167	3	pyramidal	2	227	-0.0861658	Point 21	637.452	124.619	49.024	no cnx
2020_06_11_exp3_TH	Rorb	Ai167	3	pyramidal	2	227	-0.0861658	Point 22	466.507	38.292	88.304	no cnx
2020_06_11_exp3_TH	Rorb	Ai167	3	pyramidal	2	227	-0.0861658	Point 23	373.507	375.919	16.874	no cnx
2020_06_11_exp3_TH	Rorb	Ai167	3	pyramidal	2	227	-0.0861658	Point 24	400.086	440.672	5.764	no cnx
2020_06_11_exp3_TH	Rorb	Ai167	3	pyramidal	2	227	-0.0861658	Point 25	722.285	519.064	59.044	no cnx
2020_06_11_exp3_TH	Rorb	Ai167	3	pyramidal	2	227	-0.0861658	Point 26	628.887	524.449	59.044	no cnx
2020_06_11_exp3_TH	Rorb	Ai167	3	pyramidal	2	227	-0.0861658	Point 27	636.154	449.772	45.264	no cnx
2020_06_11_exp3_TH	Rorb	Ai167	3	pyramidal	2	227	-0.0861658	Point 39	642.078	-353.808	97.294	no cnx
2020_06_11_exp3_TH	Rorb	Ai167	3	pyramidal	2	227	-0.0861658	Point 33	677.083	-156.408	98.184	no cnx
2020_06_11_exp3_TH	Rorb	Ai167	3	pyramidal	2	227	-0.0861658	Point 38	687.476	-496.586	107.514	no cnx
2020_06_11_exp3_TH	Rorb	Ai167	2	pyramidal	2	204	31.774	Point 11	404.062	-212.321	37.684	no cnx
2020_06_11_exp3_TH	Rorb	Ai167	2	pyramidal	2	204	31.774	Point 10	388.626	-390.145	24.604	no cnx
2020_06_11_exp3_TH	Rorb	Ai167	2	pyramidal	2	204	31.774	Point 13	381.513	-214.22	75.364	no cnx
2020_06_11_exp3_TH	Rorb	Ai167	2	pyramidal	2	204	31.774	Point 12	451.099	-415.024	45.034	no cnx
2020_06_11_exp3_TH	Rorb	Ai167	2	pyramidal	2	204	31.774	Point 15	712.617	-48.2756	94.214	no cnx
2020_06_11_exp3_TH	Rorb	Ai167	2	pyramidal	2	204	31.774	Point 14	687.202	-113.88	97.524	no cnx
2020_06_11_exp3_TH	Rorb	Ai167	2	pyramidal	2	204	31.774	Point 17	697.903	-282.568	77.224	no cnx
2020_06_11_exp3_TH	Rorb	Ai167	2	pyramidal	2	204	31.774	Point 16	703.499	-148.322	82.664	no cnx
2020_06_11_exp3_TH	Rorb	Ai167	2	pyramidal	2	204	31.774	Point 19	711.325	-79.1676	49.024	no cnx
2020_06_11_exp3_TH	Rorb	Ai167	2	pyramidal	2	204	31.774	Point 18	653.748	-251.689	66.934	no cnx
2020_06_11_exp3_TH	Rorb	Ai167	2	pyramidal	2	204	31.774	Point 31	753.983	285.437	31.364	no cnx
2020_06_11_exp3_TH	Rorb	Ai167	2	pyramidal	2	204	31.774	Point 30	618.41	211.893	41.234	no cnx
2020_06_11_exp3_TH	Rorb	Ai167	2	pyramidal	2	204	31.774	Point 37	750.428	-680.387	107.514	no cnx
2020_06_11_exp3_TH	Rorb	Ai167	2	pyramidal	2	204	31.774	Point 36	733.858	-521.853	107.514	no cnx
2020_06_11_exp3_TH	Rorb	Ai167	2	pyramidal	2	204	31.774	Point 35	656.004	-463.21	108.584	no cnx
2020_06_11_exp3_TH	Rorb	Ai167	2	pyramidal	2	204	31.774	Point 34	797.74	-388.656	108.584	no cnx
2020_06_11_exp3_TH	Rorb	Ai167	2	pyramidal	2	204	31.774	Point 5	387.446	-158.943	10.834	no cnx
2020_06_11_exp3_TH	Rorb	Ai167	2	pyramidal	2	204	31.774	Point 4	407.049	70.0287	10.834	no cnx
2020_06_11_exp3_TH	Rorb	Ai167	2	pyramidal	2	204	31.774	Point 7	359.008	-79.3533	-13.806	no cnx
2020_06_11_exp3_TH	Rorb	Ai167	2	pyramidal	2	204	31.774	Point 6	388.58	56.6299	-13.816	no cnx
2020_06_11_exp3_TH	Rorb	Ai167	2	pyramidal	2	204	31.774	Point 1	398.705	-67.1074	62.004	no cnx
2020_06_11_exp3_TH	Rorb	Ai167	2	pyramidal	2	204	31.774	Point 3	377.782	-137.981	16.304	no cnx
2020_06_11_exp3_TH	Rorb	Ai167	2	pyramidal	2	204	31.774	Point 2	407.896	73.7707	16.304	no cnx
2020_06_11_exp3_TH	Rorb	Ai167	2	pyramidal	2	204	31.774	Point 9	481.944	-212.235	24.604	no cnx
2020_06_11_exp3_TH	Rorb	Ai167	2	pyramidal	2	204	31.774	Point 8	424.706	-260.111	-11.106	no cnx
2020_06_11_exp3_TH	Rorb	Ai167	2	pyramidal	2	204	31.774	Point 32	791.068	-212.314	59.134	no cnx
2020_06_11_exp3_TH	Rorb	Ai167	2	pyramidal	2	204	31.774	Point 42	363.788	-188.807	-24.656	no cnx
2020_06_11_exp3_TH	Rorb	Ai167	2	pyramidal	2	204	31.774	Point 43	350.516	-126.756	39.934	no cnx
2020_06_11_exp3_TH	Rorb	Ai167	2	pyramidal	2	204	31.774	Point 40	630.393	-248.248	97.294	no cnx
2020_06_11_exp3_TH	Rorb	Ai167	2	pyramidal	2	204	31.774	Point 41	626.679	-253.357	70.954	no cnx
2020_06_11_exp3_TH	Rorb	Ai167	2	pyramidal	2	204	31.774	Point 44	192.2	-48.6457	31.094	no cnx
2020_06_11_exp3_TH	Rorb	Ai167	2	pyramidal	2	204	31.774	Point 45	374.265	-51.8586	89.544	no cnx
2020_06_11_exp3_TH	Rorb	Ai167	2	pyramidal	2	204	31.774	Point 28	814.665	219.565	88.074	no cnx
2020_06_11_exp3_TH	Rorb	Ai167	2	pyramidal	2	204	31.774	Point 29	765.751	192.118	53.054	no cnx
2020_06_11_exp3_TH	Rorb	Ai167	2	pyramidal	2	204	31.774	Point 20	661.546	-6.87973	49.024	no cnx
2020_06_11_exp3_TH	Rorb	Ai167	2	pyramidal	2	204	31.774	Point 21	643.184	1.0179	49.024	no cnx
2020_06_11_exp3_TH	Rorb	Ai167	2	pyramidal	2	204	31.774	Point 22	472.239	-85.3087	88.304	no cnx
2020_06_11_exp3_TH	Rorb	Ai167	2	pyramidal	2	204	31.774	Point 23	379.239	252.318	16.874	no cnx
2020_06_11_exp3_TH	Rorb	Ai167	2	pyramidal	2	204	31.774	Point 24	405.818	317.071	5.764	no cnx
2020_06_11_exp3_TH	Rorb	Ai167	2	pyramidal	2	204	31.774	Point 25	728.017	395.463	59.044	no cnx
2020_06_11_exp3_TH	Rorb	Ai167	2	pyramidal	2	204	31.774	Point 26	634.619	400.848	59.044	no cnx
2020_06_11_exp3_TH	Rorb	Ai167	2	pyramidal	2	204	31.774	Point 27	641.886	326.171	45.264	no cnx
2020_06_11_exp3_TH	Rorb	Ai167	2	pyramidal	2	204	31.774	Point 39	647.81	-477.408	97.294	no cnx
2020_06_11_exp3_TH	Rorb	Ai167	2	pyramidal	2	204	31.774	Point 33	682.815	-280.009	98.184	no cnx
2020_06_11_exp3_TH	Rorb	Ai167	2	pyramidal	2	204	31.774	Point 38	693.208	-620.187	107.514	no cnx
2020_06_11_exp2_TH	Rorb	Ai167	0	pyramidal	2	193	216.964	Point 5	358.413	73.6241	216.434	no cnx
2020_06_11_exp2_TH	Rorb	Ai167	0	pyramidal	2	193	216.964	Point 4	346.452	198.658	243.274	no cnx
2020_06_11_exp2_TH	Rorb	Ai167	0	pyramidal	2	193	216.964	Point 7	434.013	34.6657	205.404	no cnx
2020_06_11_exp2_TH	Rorb	Ai167	0	pyramidal	2	193	216.964	Point 6	486.561	79.354	216.434	excitatory	0.774848
2020_06_11_exp2_TH	Rorb	Ai167	0	pyramidal	2	193	216.964	Point 1	395.075	219.371	288.104	no cnx
2020_06_11_exp2_TH	Rorb	Ai167	0	pyramidal	2	193	216.964	Point 3	350.674	47.2959	250.604	no cnx
2020_06_11_exp2_TH	Rorb	Ai167	0	pyramidal	2	193	216.964	Point 2	373.448	194.461	277.834	no cnx
2020_06_11_exp2_TH	Rorb	Ai167	0	pyramidal	2	193	216.964	Point 8	525.952	-5.71022	205.404	excitatory	0.319597
2020_06_11_exp2_TH	Rorb	Ai167	0	pyramidal	2	193	216.964	Point 12	502.081	89.9597	231.294	no cnx
2020_06_11_exp1_TH	Rorb	Ai167	1	pyramidal	2	206	217.594	Point 5	406.841	119.886	201.374	no cnx
2020_06_11_exp1_TH	Rorb	Ai167	1	pyramidal	2	206	217.594	Point 4	399.04	145.916	225.164	no cnx
2020_06_11_exp1_TH	Rorb	Ai167	1	pyramidal	2	206	217.594	Point 7	401.353	-116.615	174.054	no cnx
2020_06_11_exp1_TH	Rorb	Ai167	1	pyramidal	2	206	217.594	Point 6	414.601	-3.30663	186.894	no cnx
2020_06_11_exp1_TH	Rorb	Ai167	1	pyramidal	2	206	217.594	Point 1	390.11	38.3458	223.014	no cnx
2020_06_11_exp1_TH	Rorb	Ai167	1	pyramidal	2	206	217.594	Point 3	408.897	181.051	231.924	no cnx
2020_06_11_exp1_TH	Rorb	Ai167	1	pyramidal	2	206	217.594	Point 2	369.258	218.409	231.924	no cnx
2020_06_11_exp1_TH	Rorb	Ai167	1	pyramidal	2	206	217.594	Point 9	767.508	54.9924	168.114	no cnx
2020_06_11_exp1_TH	Rorb	Ai167	1	pyramidal	2	206	217.594	Point 8	776.427	49.895	168.114	no cnx
2020_06_11_exp1_TH	Rorb	Ai167	1	pyramidal	2	206	217.594	Point 11	380.336	-41.9337	158.094	no cnx
2020_06_11_exp1_TH	Rorb	Ai167	1	pyramidal	2	206	217.594	Point 10	638.049	10.1474	164.744	no cnx
2020_06_11_exp1_TH	Rorb	Ai167	1	pyramidal	2	206	217.594	Point 13	249.114	31.4011	197.224	no cnx
2020_06_11_exp1_TH	Rorb	Ai167	1	pyramidal	2	206	217.594	Point 12	358.855	-58.5976	201.374	no cnx
2020_06_11_exp1_TH	Rorb	Ai167	1	pyramidal	2	206	217.594	Point 15	262.946	57.4587	223.104	no cnx
2020_06_11_exp1_TH	Rorb	Ai167	1	pyramidal	2	206	217.594	Point 14	165.69	-7.97349	223.104	no cnx
2020_06_11_exp1_TH	Rorb	Ai167	0	pyramidal	2	157	196.054	Point 5	394.215	268.932	201.374	no cnx
2020_06_11_exp1_TH	Rorb	Ai167	0	pyramidal	2	157	196.054	Point 4	386.414	294.962	225.164	no cnx
2020_06_11_exp1_TH	Rorb	Ai167	0	pyramidal	2	157	196.054	Point 7	388.727	32.4304	174.054	no cnx
2020_06_11_exp1_TH	Rorb	Ai167	0	pyramidal	2	157	196.054	Point 6	401.975	145.739	186.894	no cnx
2020_06_11_exp1_TH	Rorb	Ai167	0	pyramidal	2	157	196.054	Point 1	377.484	187.392	223.014	no cnx
2020_06_11_exp1_TH	Rorb	Ai167	0	pyramidal	2	157	196.054	Point 3	396.271	330.097	231.924	no cnx
2020_06_11_exp1_TH	Rorb	Ai167	0	pyramidal	2	157	196.054	Point 2	356.632	367.455	231.924	no cnx
2020_06_11_exp1_TH	Rorb	Ai167	0	pyramidal	2	157	196.054	Point 9	754.882	204.038	168.114	no cnx
2020_06_11_exp1_TH	Rorb	Ai167	0	pyramidal	2	157	196.054	Point 8	763.801	198.941	168.114	no cnx
2020_06_11_exp1_TH	Rorb	Ai167	0	pyramidal	2	157	196.054	Point 11	367.709	107.112	158.094	no cnx
2020_06_11_exp1_TH	Rorb	Ai167	0	pyramidal	2	157	196.054	Point 10	625.423	159.193	164.744	no cnx
2020_06_11_exp1_TH	Rorb	Ai167	0	pyramidal	2	157	196.054	Point 13	236.488	180.447	197.224	no cnx
2020_06_11_exp1_TH	Rorb	Ai167	0	pyramidal	2	157	196.054	Point 12	346.229	90.4482	201.374	no cnx
2020_06_11_exp1_TH	Rorb	Ai167	0	pyramidal	2	157	196.054	Point 15	250.32	206.505	223.104	no cnx
2020_06_11_exp1_TH	Rorb	Ai167	0	pyramidal	2	157	196.054	Point 14	153.063	141.072	223.104	no cnx
2020_06_05_exp3_TH	Rorb	Ai167	2	pyramidal	2	224	265	Point 5	388.403	125.977	285.994	no cnx
2020_06_05_exp3_TH	Rorb	Ai167	2	pyramidal	2	224	265	Point 4	341.446	13.8774	289.164	excitatory	0.632884
2020_06_05_exp3_TH	Rorb	Ai167	2	pyramidal	2	224	265	Point 7	444.65	-80.2006	285.994	no cnx
2020_06_05_exp3_TH	Rorb	Ai167	2	pyramidal	2	224	265	Point 6	517.594	41.5355	285.994	no cnx
2020_06_05_exp3_TH	Rorb	Ai167	2	pyramidal	2	224	265	Point 1	491.468	116.127	294.984	no cnx
2020_06_05_exp3_TH	Rorb	Ai167	2	pyramidal	2	224	265	Point 3	342.653	-1.18139	297.504	no cnx
2020_06_05_exp3_TH	Rorb	Ai167	2	pyramidal	2	224	265	Point 2	446.998	49.5018	294.984	no cnx
2020_06_05_exp3_TH	Rorb	Ai167	2	pyramidal	2	224	265	Point 9	550.378	160.389	285.994	no cnx
2020_06_05_exp3_TH	Rorb	Ai167	2	pyramidal	2	224	265	Point 8	572.817	-50.5637	285.994	no cnx
2020_06_05_exp3_TH	Rorb	Ai167	2	pyramidal	2	224	265	Point 11	369.649	88.2125	285.994	no cnx
2020_06_05_exp3_TH	Rorb	Ai167	2	pyramidal	2	224	265	Point 10	450.416	-59.9898	285.994	excitatory	0.155393
2020_06_05_exp3_TH	Rorb	Ai167	2	pyramidal	2	224	265	Point 12	446.095	-59.5062	293.204	no cnx	0.145786
2020_06_05_exp2_TH	Rorb	Ai167	1	pyramidal	2	240	141.284	Point 11	399.582	93.4561	135.524	no cnx
2020_06_05_exp2_TH	Rorb	Ai167	1	pyramidal	2	240	141.284	Point 10	472.187	-100.799	135.524	no cnx
2020_06_05_exp2_TH	Rorb	Ai167	1	pyramidal	2	240	141.284	Point 13	447.592	1.83059	133.254	no cnx
2020_06_05_exp2_TH	Rorb	Ai167	1	pyramidal	2	240	141.284	Point 12	420.664	75.8754	135.524	no cnx
2020_06_05_exp2_TH	Rorb	Ai167	1	pyramidal	2	240	141.284	Point 15	455.381	-57.8272	125.074	no cnx
2020_06_05_exp2_TH	Rorb	Ai167	1	pyramidal	2	240	141.284	Point 14	380.166	102.223	125.074	no cnx
2020_06_05_exp2_TH	Rorb	Ai167	1	pyramidal	2	240	141.284	Point 17	439.814	-86.0272	125.074	no cnx
2020_06_05_exp2_TH	Rorb	Ai167	1	pyramidal	2	240	141.284	Point 16	475.735	68.3248	125.074	no cnx
2020_06_05_exp2_TH	Rorb	Ai167	1	pyramidal	2	240	141.284	Point 19	465.683	55.2257	107.764	no cnx
2020_06_05_exp2_TH	Rorb	Ai167	1	pyramidal	2	240	141.284	Point 18	433.999	30.061	116.254	no cnx
2020_06_05_exp2_TH	Rorb	Ai167	1	pyramidal	2	240	141.284	Point 5	563.513	-75.6999	155.374	no cnx
2020_06_05_exp2_TH	Rorb	Ai167	1	pyramidal	2	240	141.284	Point 4	532.213	20.5156	155.374	no cnx
2020_06_05_exp2_TH	Rorb	Ai167	1	pyramidal	2	240	141.284	Point 7	515.953	39.5688	144.334	no cnx
2020_06_05_exp2_TH	Rorb	Ai167	1	pyramidal	2	240	141.284	Point 6	401.639	33.4812	144.334	no cnx
2020_06_05_exp2_TH	Rorb	Ai167	1	pyramidal	2	240	141.284	Point 1	398.421	72.6868	161.764	no cnx
2020_06_05_exp2_TH	Rorb	Ai167	1	pyramidal	2	240	141.284	Point 3	387.395	111.148	155.374	no cnx
2020_06_05_exp2_TH	Rorb	Ai167	1	pyramidal	2	240	141.284	Point 2	516.56	-71.6406	161.764	no cnx
2020_06_05_exp2_TH	Rorb	Ai167	1	pyramidal	2	240	141.284	Point 9	425.373	-27.5858	142.534	no cnx
2020_06_05_exp2_TH	Rorb	Ai167	1	pyramidal	2	240	141.284	Point 8	557.482	94.8442	142.534	no cnx
2020_06_05_exp2_TH	Rorb	Ai167	1	pyramidal	2	240	141.284	Point 20	496.762	139.013	107.764	no cnx
2020_06_05_exp2_TH	Rorb	Ai167	1	pyramidal	2	240	141.284	Point 21	408.532	67.8952	78.504	excitatory	0.521291
2020_06_05_exp2_TH	Rorb	Ai167	1	pyramidal	2	240	141.284	Point 23	535.008	164.833	55.934	no cnx
2020_06_05_exp2_TH	Rorb	Ai167	1	pyramidal	2	240	141.284	Point 24	569.759	84.4568	55.934	no cnx
2020_06_05_exp2_TH	Rorb	Ai167	1	pyramidal	2	240	141.284	Point 25	439.184	1.94874	55.934	no cnx
2020_06_05_exp2_TH	Rorb	Ai167	1	pyramidal	2	240	141.284	Point 26	700.671	-23.2675	76.774	no cnx
2020_06_05_exp2_TH	Rorb	Ai167	1	pyramidal	2	240	141.284	Point 27	659.653	-66.5446	76.774	no cnx
2020_06_05_exp2_TH	Rorb	Ai167	0	pyramidal	2	182	150.494	Point 11	396.678	114.444	135.524	no cnx
2020_06_05_exp2_TH	Rorb	Ai167	0	pyramidal	2	182	150.494	Point 10	469.283	-79.8107	135.524	no cnx
2020_06_05_exp2_TH	Rorb	Ai167	0	pyramidal	2	182	150.494	Point 13	444.688	22.8188	133.254	no cnx
2020_06_05_exp2_TH	Rorb	Ai167	0	pyramidal	2	182	150.494	Point 12	417.76	96.8636	135.524	no cnx
2020_06_05_exp2_TH	Rorb	Ai167	0	pyramidal	2	182	150.494	Point 5	560.609	-54.7117	155.374	no cnx
2020_06_05_exp2_TH	Rorb	Ai167	0	pyramidal	2	182	150.494	Point 4	529.309	41.5038	155.374	no cnx
2020_06_05_exp2_TH	Rorb	Ai167	0	pyramidal	2	182	150.494	Point 7	513.05	60.5569	144.334	no cnx
2020_06_05_exp2_TH	Rorb	Ai167	0	pyramidal	2	182	150.494	Point 6	398.735	54.4694	144.334	no cnx
2020_06_05_exp2_TH	Rorb	Ai167	0	pyramidal	2	182	150.494	Point 1	395.517	93.6749	161.764	no cnx
2020_06_05_exp2_TH	Rorb	Ai167	0	pyramidal	2	182	150.494	Point 3	384.491	132.136	155.374	no cnx
2020_06_05_exp2_TH	Rorb	Ai167	0	pyramidal	2	182	150.494	Point 2	513.656	-50.6524	161.764	no cnx
2020_06_05_exp2_TH	Rorb	Ai167	0	pyramidal	2	182	150.494	Point 9	422.469	-6.59769	142.534	excitatory	0.257291
2020_06_05_exp2_TH	Rorb	Ai167	0	pyramidal	2	182	150.494	Point 8	554.578	115.832	142.534	no cnx
2020_06_05_exp1_TH	Rorb	Ai167	2	pyramidal	2	204	185.224	Point 5	694.998	-156.392	184.724	no cnx
2020_06_05_exp1_TH	Rorb	Ai167	2	pyramidal	2	204	185.224	Point 4	816.963	-109.409	184.724	no cnx
2020_06_05_exp1_TH	Rorb	Ai167	2	pyramidal	2	204	185.224	Point 7	782.408	-385.529	184.084	no cnx
2020_06_05_exp1_TH	Rorb	Ai167	2	pyramidal	2	204	185.224	Point 6	649.921	-157.894	140.374	no cnx
2020_06_05_exp1_TH	Rorb	Ai167	2	pyramidal	2	204	185.224	Point 1	385.963	4.44005	205.464	no cnx
2020_06_05_exp1_TH	Rorb	Ai167	2	pyramidal	2	204	185.224	Point 3	748.908	-26.8545	184.724	no cnx
2020_06_05_exp1_TH	Rorb	Ai167	2	pyramidal	2	204	185.224	Point 2	754.106	-46.8411	219.904	no cnx
2020_06_05_exp1_TH	Rorb	Ai167	2	pyramidal	2	204	185.224	Point 9	595.441	-315.057	138.244	excitatory	0.512747
2020_06_05_exp1_TH	Rorb	Ai167	2	pyramidal	2	204	185.224	Point 8	637.093	-328.447	166.194	no cnx
2020_06_04_exp3_TH	Rorb	Ai167	2	pyramidal	2	249	120.724	Point 4	410.72	10.4039	111.974	excitatory	0.450692
2020_06_04_exp3_TH	Rorb	Ai167	2	pyramidal	2	249	120.724	Point 7	444.84	20.0785	116.314	no cnx
2020_06_04_exp3_TH	Rorb	Ai167	2	pyramidal	2	249	120.724	Point 6	347.737	7.67319	100.804	no cnx
2020_06_04_exp3_TH	Rorb	Ai167	2	pyramidal	2	249	120.724	Point 1	454.868	-79.7498	129.594	excitatory	1.56907
2020_06_04_exp3_TH	Rorb	Ai167	2	pyramidal	2	249	120.724	Point 3	368.354	135.924	130.724	no cnx
2020_06_04_exp3_TH	Rorb	Ai167	2	pyramidal	2	249	120.724	Point 2	548.283	-56.283	130.724	no cnx
2020_06_04_exp2_TH	Rorb	Ai167	3	pyramidal	2	218	316.514	Point 5	349.774	90.475	256.574	no cnx
2020_06_04_exp2_TH	Rorb	Ai167	3	pyramidal	2	218	316.514	Point 4	426.909	159.391	292.994	no cnx
2020_06_04_exp2_TH	Rorb	Ai167	3	pyramidal	2	218	316.514	Point 7	420.839	-1.30718	242.474	no cnx
2020_06_04_exp2_TH	Rorb	Ai167	3	pyramidal	2	218	316.514	Point 6	398.575	-37.7214	256.574	no cnx
2020_06_04_exp2_TH	Rorb	Ai167	3	pyramidal	2	218	316.514	Point 1	307.76	76.3228	320.994	no cnx
2020_06_04_exp2_TH	Rorb	Ai167	3	pyramidal	2	218	316.514	Point 3	423.136	47.3097	305.794	no cnx
2020_06_04_exp2_TH	Rorb	Ai167	3	pyramidal	2	218	316.514	Point 2	358.086	17.4318	314.644	no cnx
2020_06_04_exp2_TH	Rorb	Ai167	3	pyramidal	2	218	316.514	Point 9	349.823	-5.90976	236.264	no cnx
2020_06_04_exp2_TH	Rorb	Ai167	3	pyramidal	2	218	316.514	Point 8	344.14	162.741	236.264	no cnx
2020_06_04_exp2_TH	Rorb	Ai167	3	pyramidal	2	218	316.514	Point 11	617.572	156.162	349.754	no cnx
2020_06_04_exp2_TH	Rorb	Ai167	3	pyramidal	2	218	316.514	Point 10	583.932	156.703	349.754	no cnx
2020_06_04_exp2_TH	Rorb	Ai167	3	pyramidal	2	218	316.514	Point 13	587.847	-19.823	332.104	no cnx
2020_06_04_exp2_TH	Rorb	Ai167	3	pyramidal	2	218	316.514	Point 12	613.376	-74.1874	349.754	no cnx
2020_06_04_exp2_TH	Rorb	Ai167	3	pyramidal	2	218	316.514	Point 14	589.167	103.521	114.584	excitatory	0.483663
2020_05_29_exp2_TH	Tlx3	ChrimsonR_kv_eyfp_AAV	3	pyramidal	2	241	79.4241	Point 11	485.102	165.297	106.824	no cnx
2020_05_29_exp2_TH	Tlx3	ChrimsonR_kv_eyfp_AAV	3	pyramidal	2	241	79.4241	Point 10	504.574	211.682	106.824	no cnx
2020_05_29_exp2_TH	Tlx3	ChrimsonR_kv_eyfp_AAV	3	pyramidal	2	241	79.4241	Point 13	531.241	55.7741	106.824	no cnx
2020_05_29_exp2_TH	Tlx3	ChrimsonR_kv_eyfp_AAV	3	pyramidal	2	241	79.4241	Point 12	569.508	95.6278	106.824	no cnx
2020_05_29_exp2_TH	Tlx3	ChrimsonR_kv_eyfp_AAV	3	pyramidal	2	241	79.4241	Point 15	558.963	48.6893	106.824	no cnx
2020_05_29_exp2_TH	Tlx3	ChrimsonR_kv_eyfp_AAV	3	pyramidal	2	241	79.4241	Point 14	500.07	73.4922	106.824	no cnx
2020_05_29_exp2_TH	Tlx3	ChrimsonR_kv_eyfp_AAV	3	pyramidal	2	241	79.4241	Point 17	463.427	105.683	105.304	no cnx
2020_05_29_exp2_TH	Tlx3	ChrimsonR_kv_eyfp_AAV	3	pyramidal	2	241	79.4241	Point 16	447.077	67.7575	98.994	no cnx
2020_05_29_exp2_TH	Tlx3	ChrimsonR_kv_eyfp_AAV	3	pyramidal	2	241	79.4241	Point 19	430.251	60.3026	98.214	no cnx
2020_05_29_exp2_TH	Tlx3	ChrimsonR_kv_eyfp_AAV	3	pyramidal	2	241	79.4241	Point 18	464.082	44.3473	105.304	no cnx
2020_05_29_exp2_TH	Tlx3	ChrimsonR_kv_eyfp_AAV	3	pyramidal	2	241	79.4241	Point 5	475.599	144.27	118.244	no cnx
2020_05_29_exp2_TH	Tlx3	ChrimsonR_kv_eyfp_AAV	3	pyramidal	2	241	79.4241	Point 4	467.766	99.4688	118.244	no cnx
2020_05_29_exp2_TH	Tlx3	ChrimsonR_kv_eyfp_AAV	3	pyramidal	2	241	79.4241	Point 7	491.698	98.5712	118.244	no cnx
2020_05_29_exp2_TH	Tlx3	ChrimsonR_kv_eyfp_AAV	3	pyramidal	2	241	79.4241	Point 6	561.236	179.413	118.244	no cnx
2020_05_29_exp2_TH	Tlx3	ChrimsonR_kv_eyfp_AAV	3	pyramidal	2	241	79.4241	Point 1	498.894	166.001	118.224	no cnx
2020_05_29_exp2_TH	Tlx3	ChrimsonR_kv_eyfp_AAV	3	pyramidal	2	241	79.4241	Point 3	481.052	80.0991	118.224	no cnx
2020_05_29_exp2_TH	Tlx3	ChrimsonR_kv_eyfp_AAV	3	pyramidal	2	241	79.4241	Point 2	514.413	95.5817	118.224	no cnx
2020_05_29_exp2_TH	Tlx3	ChrimsonR_kv_eyfp_AAV	3	pyramidal	2	241	79.4241	Point 9	492.009	139.888	118.244	excitatory	0.0765939
2020_05_29_exp2_TH	Tlx3	ChrimsonR_kv_eyfp_AAV	3	pyramidal	2	241	79.4241	Point 8	466.66	119.849	118.244	no cnx
2020_05_29_exp2_TH	Tlx3	ChrimsonR_kv_eyfp_AAV	3	pyramidal	2	241	79.4241	Point 20	464.688	59.6828	98.214	no cnx
2020_05_29_exp2_TH	Tlx3	ChrimsonR_kv_eyfp_AAV	3	pyramidal	2	241	79.4241	Point 21	468.198	55.5513	98.994	excitatory	0.329297
2020_05_29_exp2_TH	Tlx3	ChrimsonR_kv_eyfp_AAV	2	pyramidal	2	285	92.254	Point 11	483.859	78.3641	106.824	no cnx
2020_05_29_exp2_TH	Tlx3	ChrimsonR_kv_eyfp_AAV	2	pyramidal	2	285	92.254	Point 10	503.331	124.749	106.824	no cnx
2020_05_29_exp2_TH	Tlx3	ChrimsonR_kv_eyfp_AAV	2	pyramidal	2	285	92.254	Point 13	529.999	-31.1584	106.824	no cnx
2020_05_29_exp2_TH	Tlx3	ChrimsonR_kv_eyfp_AAV	2	pyramidal	2	285	92.254	Point 12	568.266	8.69531	106.824	no cnx
2020_05_29_exp2_TH	Tlx3	ChrimsonR_kv_eyfp_AAV	2	pyramidal	2	285	92.254	Point 15	557.721	-38.2433	106.824	no cnx
2020_05_29_exp2_TH	Tlx3	ChrimsonR_kv_eyfp_AAV	2	pyramidal	2	285	92.254	Point 14	498.827	-13.4403	106.824	no cnx
2020_05_29_exp2_TH	Tlx3	ChrimsonR_kv_eyfp_AAV	2	pyramidal	2	285	92.254	Point 17	462.185	18.7504	105.304	no cnx
2020_05_29_exp2_TH	Tlx3	ChrimsonR_kv_eyfp_AAV	2	pyramidal	2	285	92.254	Point 16	445.834	-19.1751	98.994	excitatory	0.996763
2020_05_29_exp2_TH	Tlx3	ChrimsonR_kv_eyfp_AAV	2	pyramidal	2	285	92.254	Point 19	429.008	-26.6299	98.214	no cnx
2020_05_29_exp2_TH	Tlx3	ChrimsonR_kv_eyfp_AAV	2	pyramidal	2	285	92.254	Point 18	462.84	-42.5852	105.304	no cnx
2020_05_29_exp2_TH	Tlx3	ChrimsonR_kv_eyfp_AAV	2	pyramidal	2	285	92.254	Point 31	508.152	-27.3083	108.564	no cnx
2020_05_29_exp2_TH	Tlx3	ChrimsonR_kv_eyfp_AAV	2	pyramidal	2	285	92.254	Point 30	463.959	-67.8882	108.564	no cnx
2020_05_29_exp2_TH	Tlx3	ChrimsonR_kv_eyfp_AAV	2	pyramidal	2	285	92.254	Point 5	474.357	57.3379	118.244	no cnx
2020_05_29_exp2_TH	Tlx3	ChrimsonR_kv_eyfp_AAV	2	pyramidal	2	285	92.254	Point 4	466.523	12.5363	118.244	no cnx
2020_05_29_exp2_TH	Tlx3	ChrimsonR_kv_eyfp_AAV	2	pyramidal	2	285	92.254	Point 7	490.456	11.6387	118.244	no cnx
2020_05_29_exp2_TH	Tlx3	ChrimsonR_kv_eyfp_AAV	2	pyramidal	2	285	92.254	Point 6	559.993	92.4809	118.244	no cnx
2020_05_29_exp2_TH	Tlx3	ChrimsonR_kv_eyfp_AAV	2	pyramidal	2	285	92.254	Point 1	497.652	79.0684	118.224	no cnx
2020_05_29_exp2_TH	Tlx3	ChrimsonR_kv_eyfp_AAV	2	pyramidal	2	285	92.254	Point 3	479.809	-6.83339	118.224	no cnx
2020_05_29_exp2_TH	Tlx3	ChrimsonR_kv_eyfp_AAV	2	pyramidal	2	285	92.254	Point 2	513.17	8.64915	118.224	no cnx
2020_05_29_exp2_TH	Tlx3	ChrimsonR_kv_eyfp_AAV	2	pyramidal	2	285	92.254	Point 9	490.766	52.9557	118.244	no cnx
2020_05_29_exp2_TH	Tlx3	ChrimsonR_kv_eyfp_AAV	2	pyramidal	2	285	92.254	Point 8	465.418	32.9163	118.244	no cnx
2020_05_29_exp2_TH	Tlx3	ChrimsonR_kv_eyfp_AAV	2	pyramidal	2	285	92.254	Point 28	542.788	-204.052	108.564	no cnx
2020_05_29_exp2_TH	Tlx3	ChrimsonR_kv_eyfp_AAV	2	pyramidal	2	285	92.254	Point 29	468.577	-161.785	108.564	no cnx
2020_05_29_exp2_TH	Tlx3	ChrimsonR_kv_eyfp_AAV	2	pyramidal	2	285	92.254	Point 21	466.956	-31.3813	98.994	no cnx
2020_05_29_exp2_TH	Tlx3	ChrimsonR_kv_eyfp_AAV	2	pyramidal	2	285	92.254	Point 23	508.481	-74.1781	106.614	no cnx
2020_05_29_exp2_TH	Tlx3	ChrimsonR_kv_eyfp_AAV	2	pyramidal	2	285	92.254	Point 24	505.551	-94.4529	106.614	no cnx
2020_05_29_exp2_TH	Tlx3	ChrimsonR_kv_eyfp_AAV	2	pyramidal	2	285	92.254	Point 25	524.412	-158.935	106.614	no cnx
2020_05_29_exp2_TH	Tlx3	ChrimsonR_kv_eyfp_AAV	2	pyramidal	2	285	92.254	Point 26	473.063	-139.248	106.614	no cnx
2020_05_29_exp2_TH	Tlx3	ChrimsonR_kv_eyfp_AAV	2	pyramidal	2	285	92.254	Point 27	498.974	-184.789	108.564	no cnx
2020_05_29_exp1_TH	Tlx3	ChrimsonR_kv_eyfp_AAV	3	pyramidal	2	184	128.954	Point 11	518.891	10.0362	193.944	no cnx
2020_05_29_exp1_TH	Tlx3	ChrimsonR_kv_eyfp_AAV	3	pyramidal	2	184	128.954	Point 10	541.28	84.9822	162.134	no cnx
2020_05_29_exp1_TH	Tlx3	ChrimsonR_kv_eyfp_AAV	3	pyramidal	2	184	128.954	Point 13	474.203	-49.1768	193.944	no cnx
2020_05_29_exp1_TH	Tlx3	ChrimsonR_kv_eyfp_AAV	3	pyramidal	2	184	128.954	Point 12	520.943	-31.5726	193.944	excitatory	0.306044
2020_05_29_exp1_TH	Tlx3	ChrimsonR_kv_eyfp_AAV	3	pyramidal	2	184	128.954	Point 15	450.438	-100.773	193.944	no cnx
2020_05_29_exp1_TH	Tlx3	ChrimsonR_kv_eyfp_AAV	3	pyramidal	2	184	128.954	Point 14	413.551	-19.6371	193.944	no cnx
2020_05_29_exp1_TH	Tlx3	ChrimsonR_kv_eyfp_AAV	3	pyramidal	2	184	128.954	Point 17	389.921	-39.5118	193.944	no cnx
2020_05_29_exp1_TH	Tlx3	ChrimsonR_kv_eyfp_AAV	3	pyramidal	2	184	128.954	Point 16	415.452	-89.387	193.944	no cnx
2020_05_29_exp1_TH	Tlx3	ChrimsonR_kv_eyfp_AAV	3	pyramidal	2	184	128.954	Point 19	376.528	-69.0791	193.944	excitatory	0.317416
2020_05_29_exp1_TH	Tlx3	ChrimsonR_kv_eyfp_AAV	3	pyramidal	2	184	128.954	Point 18	376.434	-47.5979	193.944	no cnx
2020_05_29_exp1_TH	Tlx3	ChrimsonR_kv_eyfp_AAV	3	pyramidal	2	184	128.954	Point 5	460.235	-88.1335	175.114	no cnx
2020_05_29_exp1_TH	Tlx3	ChrimsonR_kv_eyfp_AAV	3	pyramidal	2	184	128.954	Point 4	434.264	101.507	175.114	no cnx
2020_05_29_exp1_TH	Tlx3	ChrimsonR_kv_eyfp_AAV	3	pyramidal	2	184	128.954	Point 7	511.043	105.511	162.134	excitatory	0.564563
2020_05_29_exp1_TH	Tlx3	ChrimsonR_kv_eyfp_AAV	3	pyramidal	2	184	128.954	Point 6	527.679	105.392	175.114	excitatory	0.718997
2020_05_29_exp1_TH	Tlx3	ChrimsonR_kv_eyfp_AAV	3	pyramidal	2	184	128.954	Point 1	469.375	126.935	175.114	no cnx
2020_05_29_exp1_TH	Tlx3	ChrimsonR_kv_eyfp_AAV	3	pyramidal	2	184	128.954	Point 3	425.677	-19.1479	175.114	no cnx
2020_05_29_exp1_TH	Tlx3	ChrimsonR_kv_eyfp_AAV	3	pyramidal	2	184	128.954	Point 2	452.821	80.4875	175.114	no cnx
2020_05_29_exp1_TH	Tlx3	ChrimsonR_kv_eyfp_AAV	3	pyramidal	2	184	128.954	Point 9	506.297	64.3965	162.134	no cnx
2020_05_29_exp1_TH	Tlx3	ChrimsonR_kv_eyfp_AAV	3	pyramidal	2	184	128.954	Point 8	534.159	96.7181	162.134	no cnx
2020_05_29_exp1_TH	Tlx3	ChrimsonR_kv_eyfp_AAV	3	pyramidal	2	184	128.954	Point 20	488.004	-15.8449	191.064	no cnx
2020_05_29_exp1_TH	Tlx3	ChrimsonR_kv_eyfp_AAV	3	pyramidal	2	184	128.954	Point 21	541.837	-43.1822	195.144	excitatory	0.323952
2020_05_29_exp1_TH	Tlx3	ChrimsonR_kv_eyfp_AAV	3	pyramidal	2	184	128.954	Point 22	548.587	5.68944	191.064	no cnx
2020_05_29_exp1_TH	Tlx3	ChrimsonR_kv_eyfp_AAV	3	pyramidal	2	184	128.954	Point 23	543.114	21.9934	191.064	excitatory	0.0467628
2020_05_29_exp1_TH	Tlx3	ChrimsonR_kv_eyfp_AAV	3	pyramidal	2	184	128.954	Point 24	560.233	-18.6287	188.924	excitatory	0.057846
2020_05_29_exp1_TH	Tlx3	ChrimsonR_kv_eyfp_AAV	3	pyramidal	2	184	128.954	Point 25	593.904	-47.0552	188.924	no cnx
2020_05_29_exp1_TH	Tlx3	ChrimsonR_kv_eyfp_AAV	3	pyramidal	2	184	128.954	Point 26	466.323	1.1861	188.924	no cnx
2020_05_29_exp1_TH	Tlx3	ChrimsonR_kv_eyfp_AAV	3	pyramidal	2	184	128.954	Point 27	555.928	-56.1609	200.944	excitatory	0.209447
2020_05_28_exp1_TH	Rorb	ChrimsonR_kv_eyfp_AAV	1	pyramidal	2	154	118.784	Point 11	296.366	50.7172	163.254	no cnx
2020_05_28_exp1_TH	Rorb	ChrimsonR_kv_eyfp_AAV	1	pyramidal	2	154	118.784	Point 10	456.071	124.773	163.254	no cnx
2020_05_28_exp1_TH	Rorb	ChrimsonR_kv_eyfp_AAV	1	pyramidal	2	154	118.784	Point 13	383.959	-20.2351	161.474	excitatory	0.1553
2020_05_28_exp1_TH	Rorb	ChrimsonR_kv_eyfp_AAV	1	pyramidal	2	154	118.784	Point 12	369.53	17.5138	155.624	excitatory	0.0576065
2020_05_28_exp1_TH	Rorb	ChrimsonR_kv_eyfp_AAV	1	pyramidal	2	154	118.784	Point 15	384.62	50.0824	155.624	no cnx
2020_05_28_exp1_TH	Rorb	ChrimsonR_kv_eyfp_AAV	1	pyramidal	2	154	118.784	Point 14	418.811	12.0325	155.624	inhibitory
2020_05_28_exp1_TH	Rorb	ChrimsonR_kv_eyfp_AAV	1	pyramidal	2	154	118.784	Point 17	379.763	-52.5873	161.474	no cnx
2020_05_28_exp1_TH	Rorb	ChrimsonR_kv_eyfp_AAV	1	pyramidal	2	154	118.784	Point 16	332.731	35.22	155.624	no cnx
2020_05_28_exp1_TH	Rorb	ChrimsonR_kv_eyfp_AAV	1	pyramidal	2	154	118.784	Point 19	540.722	53.0472	161.484	no cnx
2020_05_28_exp1_TH	Rorb	ChrimsonR_kv_eyfp_AAV	1	pyramidal	2	154	118.784	Point 18	569.313	25.6991	161.484	no cnx
2020_05_28_exp1_TH	Rorb	ChrimsonR_kv_eyfp_AAV	1	pyramidal	2	154	118.784	Point 31	455.015	-29.6016	160.534	no cnx
2020_05_28_exp1_TH	Rorb	ChrimsonR_kv_eyfp_AAV	1	pyramidal	2	154	118.784	Point 30	409.025	-30.7696	160.534	no cnx
2020_05_28_exp1_TH	Rorb	ChrimsonR_kv_eyfp_AAV	1	pyramidal	2	154	118.784	Point 37	426.748	-104.471	150.864	no cnx
2020_05_28_exp1_TH	Rorb	ChrimsonR_kv_eyfp_AAV	1	pyramidal	2	154	118.784	Point 36	510.86	-20.0335	150.864	no cnx
2020_05_28_exp1_TH	Rorb	ChrimsonR_kv_eyfp_AAV	1	pyramidal	2	154	118.784	Point 35	458.44	-6.31722	150.864	excitatory	0.385124
2020_05_28_exp1_TH	Rorb	ChrimsonR_kv_eyfp_AAV	1	pyramidal	2	154	118.784	Point 34	446.228	-134.027	160.534	no cnx
2020_05_28_exp1_TH	Rorb	ChrimsonR_kv_eyfp_AAV	1	pyramidal	2	154	118.784	Point 5	373.062	53.2986	147.044	no cnx
2020_05_28_exp1_TH	Rorb	ChrimsonR_kv_eyfp_AAV	1	pyramidal	2	154	118.784	Point 4	351.11	-69.172	147.044	no cnx
2020_05_28_exp1_TH	Rorb	ChrimsonR_kv_eyfp_AAV	1	pyramidal	2	154	118.784	Point 7	339.759	7.36594	163.244	no cnx
2020_05_28_exp1_TH	Rorb	ChrimsonR_kv_eyfp_AAV	1	pyramidal	2	154	118.784	Point 6	352.957	-117.207	147.044	no cnx
2020_05_28_exp1_TH	Rorb	ChrimsonR_kv_eyfp_AAV	1	pyramidal	2	154	118.784	Point 1	277.146	69.2227	147.044	no cnx
2020_05_28_exp1_TH	Rorb	ChrimsonR_kv_eyfp_AAV	1	pyramidal	2	154	118.784	Point 3	349.415	-84.7387	147.044	no cnx
2020_05_28_exp1_TH	Rorb	ChrimsonR_kv_eyfp_AAV	1	pyramidal	2	154	118.784	Point 2	279.727	-72.7333	147.044	no cnx
2020_05_28_exp1_TH	Rorb	ChrimsonR_kv_eyfp_AAV	1	pyramidal	2	154	118.784	Point 9	361.142	126.364	163.254	no cnx
2020_05_28_exp1_TH	Rorb	ChrimsonR_kv_eyfp_AAV	1	pyramidal	2	154	118.784	Point 8	381.162	19.0066	163.244	excitatory	0.208493
2020_05_28_exp1_TH	Rorb	ChrimsonR_kv_eyfp_AAV	1	pyramidal	2	154	118.784	Point 32	446.486	7.38353	160.534	excitatory	0.0994865
2020_05_28_exp1_TH	Rorb	ChrimsonR_kv_eyfp_AAV	1	pyramidal	2	154	118.784	Point 40	462.441	3.77506	130.494	no cnx
2020_05_28_exp1_TH	Rorb	ChrimsonR_kv_eyfp_AAV	1	pyramidal	2	154	118.784	Point 41	445.167	-18.2365	130.534	excitatory	0.672381
2020_05_28_exp1_TH	Rorb	ChrimsonR_kv_eyfp_AAV	1	pyramidal	2	154	118.784	Point 28	485.743	-69.3768	152.974	no cnx
2020_05_28_exp1_TH	Rorb	ChrimsonR_kv_eyfp_AAV	1	pyramidal	2	154	118.784	Point 29	400.205	-69.7272	160.534	no cnx
2020_05_28_exp1_TH	Rorb	ChrimsonR_kv_eyfp_AAV	1	pyramidal	2	154	118.784	Point 20	563.613	-7.01635	161.484	no cnx
2020_05_28_exp1_TH	Rorb	ChrimsonR_kv_eyfp_AAV	1	pyramidal	2	154	118.784	Point 21	522.414	-60.909	161.484	no cnx
2020_05_28_exp1_TH	Rorb	ChrimsonR_kv_eyfp_AAV	1	pyramidal	2	154	118.784	Point 22	529.34	-7.83158	152.964	no cnx
2020_05_28_exp1_TH	Rorb	ChrimsonR_kv_eyfp_AAV	1	pyramidal	2	154	118.784	Point 23	597.701	-42.5784	152.974	no cnx
2020_05_28_exp1_TH	Rorb	ChrimsonR_kv_eyfp_AAV	1	pyramidal	2	154	118.784	Point 24	441.882	35.5402	152.974	no cnx
2020_05_28_exp1_TH	Rorb	ChrimsonR_kv_eyfp_AAV	1	pyramidal	2	154	118.784	Point 25	484.405	39.1724	152.974	no cnx
2020_05_28_exp1_TH	Rorb	ChrimsonR_kv_eyfp_AAV	1	pyramidal	2	154	118.784	Point 26	587.309	129.732	152.974	no cnx
2020_05_28_exp1_TH	Rorb	ChrimsonR_kv_eyfp_AAV	1	pyramidal	2	154	118.784	Point 27	571.591	-53.2827	152.974	no cnx
2020_05_28_exp1_TH	Rorb	ChrimsonR_kv_eyfp_AAV	1	pyramidal	2	154	118.784	Point 39	420.937	-158.711	150.864	no cnx
2020_05_28_exp1_TH	Rorb	ChrimsonR_kv_eyfp_AAV	1	pyramidal	2	154	118.784	Point 33	444.855	-4.07411	160.534	no cnx
2020_05_28_exp1_TH	Rorb	ChrimsonR_kv_eyfp_AAV	1	pyramidal	2	154	118.784	Point 38	417.269	-117.366	150.864	no cnx
2020_05_27_exp2_TH	Penk	ChrimsonR_kv_eyfp_AAV	2	pyramidal	2	161	13.4309	Point 11	153.462	-292.847	-15.429	no cnx
2020_05_27_exp2_TH	Penk	ChrimsonR_kv_eyfp_AAV	2	pyramidal	2	161	13.4309	Point 10	163.925	-28.6383	-15.429	direct
2020_05_27_exp2_TH	Penk	ChrimsonR_kv_eyfp_AAV	2	pyramidal	2	161	13.4309	Point 13	152.874	-67.6342	-15.429	excitatory	0.0934493
2020_05_27_exp2_TH	Penk	ChrimsonR_kv_eyfp_AAV	2	pyramidal	2	161	13.4309	Point 12	225.838	-122.869	-15.429	no cnx
2020_05_27_exp2_TH	Penk	ChrimsonR_kv_eyfp_AAV	2	pyramidal	2	161	13.4309	Point 15	164.07	-223.51	-22.929	no cnx
2020_05_27_exp2_TH	Penk	ChrimsonR_kv_eyfp_AAV	2	pyramidal	2	161	13.4309	Point 14	168.635	-221.375	-15.429	no cnx
2020_05_27_exp2_TH	Penk	ChrimsonR_kv_eyfp_AAV	2	pyramidal	2	161	13.4309	Point 17	163.797	-133.729	-22.569	no cnx
2020_05_27_exp2_TH	Penk	ChrimsonR_kv_eyfp_AAV	2	pyramidal	2	161	13.4309	Point 16	161.487	-195.795	-22.929	no cnx
2020_05_27_exp2_TH	Penk	ChrimsonR_kv_eyfp_AAV	2	pyramidal	2	161	13.4309	Point 19	135.374	-82.9531	-22.929	no cnx
2020_05_27_exp2_TH	Penk	ChrimsonR_kv_eyfp_AAV	2	pyramidal	2	161	13.4309	Point 18	113.454	-116.428	-22.569	no cnx
2020_05_27_exp2_TH	Penk	ChrimsonR_kv_eyfp_AAV	2	pyramidal	2	161	13.4309	Point 5	193.614	-240.926	-6.609	no cnx
2020_05_27_exp2_TH	Penk	ChrimsonR_kv_eyfp_AAV	2	pyramidal	2	161	13.4309	Point 4	264.013	-36.387	-6.609	no cnx
2020_05_27_exp2_TH	Penk	ChrimsonR_kv_eyfp_AAV	2	pyramidal	2	161	13.4309	Point 7	131.11	-285.982	-15.429	no cnx
2020_05_27_exp2_TH	Penk	ChrimsonR_kv_eyfp_AAV	2	pyramidal	2	161	13.4309	Point 6	202.878	-58.8121	-6.609	no cnx
2020_05_27_exp2_TH	Penk	ChrimsonR_kv_eyfp_AAV	2	pyramidal	2	161	13.4309	Point 1	110.198	-228.013	-6.609	no cnx
2020_05_27_exp2_TH	Penk	ChrimsonR_kv_eyfp_AAV	2	pyramidal	2	161	13.4309	Point 3	206.701	-37.8385	-6.599	direct
2020_05_27_exp2_TH	Penk	ChrimsonR_kv_eyfp_AAV	2	pyramidal	2	161	13.4309	Point 2	222.285	-170.596	-6.609	no cnx
2020_05_27_exp2_TH	Penk	ChrimsonR_kv_eyfp_AAV	2	pyramidal	2	161	13.4309	Point 9	284.437	-146.104	-15.429	no cnx
2020_05_27_exp2_TH	Penk	ChrimsonR_kv_eyfp_AAV	2	pyramidal	2	161	13.4309	Point 8	175.839	-148.844	-15.429	no cnx
2020_05_27_exp2_TH	Penk	ChrimsonR_kv_eyfp_AAV	2	pyramidal	2	161	13.4309	Point 20	191.345	-51.2297	-22.569	direct
2020_05_27_exp2_TH	Penk	ChrimsonR_kv_eyfp_AAV	1	pyramidal	2	166	13.0408	Point 11	159.074	-173.35	-15.429	no cnx
2020_05_27_exp2_TH	Penk	ChrimsonR_kv_eyfp_AAV	1	pyramidal	2	166	13.0408	Point 10	169.538	90.8587	-15.429	no cnx
2020_05_27_exp2_TH	Penk	ChrimsonR_kv_eyfp_AAV	1	pyramidal	2	166	13.0408	Point 13	158.486	51.8628	-15.429	no cnx
2020_05_27_exp2_TH	Penk	ChrimsonR_kv_eyfp_AAV	1	pyramidal	2	166	13.0408	Point 12	231.45	-3.3718	-15.429	no cnx
2020_05_27_exp2_TH	Penk	ChrimsonR_kv_eyfp_AAV	1	pyramidal	2	166	13.0408	Point 15	169.682	-104.013	-22.929	no cnx
2020_05_27_exp2_TH	Penk	ChrimsonR_kv_eyfp_AAV	1	pyramidal	2	166	13.0408	Point 14	174.247	-101.878	-15.429	no cnx
2020_05_27_exp2_TH	Penk	ChrimsonR_kv_eyfp_AAV	1	pyramidal	2	166	13.0408	Point 17	169.409	-14.2324	-22.569	no cnx
2020_05_27_exp2_TH	Penk	ChrimsonR_kv_eyfp_AAV	1	pyramidal	2	166	13.0408	Point 16	167.099	-76.2983	-22.929	no cnx
2020_05_27_exp2_TH	Penk	ChrimsonR_kv_eyfp_AAV	1	pyramidal	2	166	13.0408	Point 19	140.986	36.5439	-22.929	no cnx
2020_05_27_exp2_TH	Penk	ChrimsonR_kv_eyfp_AAV	1	pyramidal	2	166	13.0408	Point 18	119.067	3.06889	-22.569	excitatory	0.177704
2020_05_27_exp2_TH	Penk	ChrimsonR_kv_eyfp_AAV	1	pyramidal	2	166	13.0408	Point 31	173.31	-193.444	11.431	no cnx
2020_05_27_exp2_TH	Penk	ChrimsonR_kv_eyfp_AAV	1	pyramidal	2	166	13.0408	Point 30	195.576	-292.48	11.431	no cnx
2020_05_27_exp2_TH	Penk	ChrimsonR_kv_eyfp_AAV	1	pyramidal	2	166	13.0408	Point 37	244.279	-94.7256	2.991	no cnx
2020_05_27_exp2_TH	Penk	ChrimsonR_kv_eyfp_AAV	1	pyramidal	2	166	13.0408	Point 36	260.929	-192.772	2.991	no cnx
2020_05_27_exp2_TH	Penk	ChrimsonR_kv_eyfp_AAV	1	pyramidal	2	166	13.0408	Point 35	210.12	-78.4581	2.991	no cnx
2020_05_27_exp2_TH	Penk	ChrimsonR_kv_eyfp_AAV	1	pyramidal	2	166	13.0408	Point 34	226.571	-247.17	11.431	no cnx
2020_05_27_exp2_TH	Penk	ChrimsonR_kv_eyfp_AAV	1	pyramidal	2	166	13.0408	Point 5	199.226	-121.429	-6.609	no cnx
2020_05_27_exp2_TH	Penk	ChrimsonR_kv_eyfp_AAV	1	pyramidal	2	166	13.0408	Point 4	269.625	83.11	-6.609	no cnx
2020_05_27_exp2_TH	Penk	ChrimsonR_kv_eyfp_AAV	1	pyramidal	2	166	13.0408	Point 7	136.722	-166.485	-15.429	no cnx
2020_05_27_exp2_TH	Penk	ChrimsonR_kv_eyfp_AAV	1	pyramidal	2	166	13.0408	Point 6	208.49	60.6849	-6.609	no cnx
2020_05_27_exp2_TH	Penk	ChrimsonR_kv_eyfp_AAV	1	pyramidal	2	166	13.0408	Point 1	115.81	-108.516	-6.609	no cnx
2020_05_27_exp2_TH	Penk	ChrimsonR_kv_eyfp_AAV	1	pyramidal	2	166	13.0408	Point 3	212.313	81.6585	-6.599	no cnx
2020_05_27_exp2_TH	Penk	ChrimsonR_kv_eyfp_AAV	1	pyramidal	2	166	13.0408	Point 2	227.897	-51.0988	-6.609	no cnx
2020_05_27_exp2_TH	Penk	ChrimsonR_kv_eyfp_AAV	1	pyramidal	2	166	13.0408	Point 9	290.049	-26.6068	-15.429	no cnx
2020_05_27_exp2_TH	Penk	ChrimsonR_kv_eyfp_AAV	1	pyramidal	2	166	13.0408	Point 8	181.452	-29.3473	-15.429	excitatory	0.13653
2020_05_27_exp2_TH	Penk	ChrimsonR_kv_eyfp_AAV	1	pyramidal	2	166	13.0408	Point 32	283.346	-168.061	11.431	no cnx
2020_05_27_exp2_TH	Penk	ChrimsonR_kv_eyfp_AAV	1	pyramidal	2	166	13.0408	Point 40	274.516	-249.301	2.991	no cnx
2020_05_27_exp2_TH	Penk	ChrimsonR_kv_eyfp_AAV	1	pyramidal	2	166	13.0408	Point 41	202.617	-342.682	2.991	no cnx
2020_05_27_exp2_TH	Penk	ChrimsonR_kv_eyfp_AAV	1	pyramidal	2	166	13.0408	Point 28	165.088	185.256	5.861	no cnx
2020_05_27_exp2_TH	Penk	ChrimsonR_kv_eyfp_AAV	1	pyramidal	2	166	13.0408	Point 29	340.565	157.14	5.861	no cnx
2020_05_27_exp2_TH	Penk	ChrimsonR_kv_eyfp_AAV	1	pyramidal	2	166	13.0408	Point 20	196.958	68.2673	-22.569	no cnx
2020_05_27_exp2_TH	Penk	ChrimsonR_kv_eyfp_AAV	1	pyramidal	2	166	13.0408	Point 21	271.547	-36.0267	5.861	no cnx
2020_05_27_exp2_TH	Penk	ChrimsonR_kv_eyfp_AAV	1	pyramidal	2	166	13.0408	Point 22	218.137	-62.089	5.861	no cnx
2020_05_27_exp2_TH	Penk	ChrimsonR_kv_eyfp_AAV	1	pyramidal	2	166	13.0408	Point 23	140.049	-94.7564	5.861	no cnx
2020_05_27_exp2_TH	Penk	ChrimsonR_kv_eyfp_AAV	1	pyramidal	2	166	13.0408	Point 24	151.205	-61.5941	5.861	no cnx
2020_05_27_exp2_TH	Penk	ChrimsonR_kv_eyfp_AAV	1	pyramidal	2	166	13.0408	Point 25	228.666	98.757	5.861	no cnx
2020_05_27_exp2_TH	Penk	ChrimsonR_kv_eyfp_AAV	1	pyramidal	2	166	13.0408	Point 26	155.998	114.86	5.861	no cnx
2020_05_27_exp2_TH	Penk	ChrimsonR_kv_eyfp_AAV	1	pyramidal	2	166	13.0408	Point 27	207.156	5.20313	5.861	direct
2020_05_27_exp2_TH	Penk	ChrimsonR_kv_eyfp_AAV	1	pyramidal	2	166	13.0408	Point 39	182.128	-133.081	2.991	no cnx
2020_05_27_exp2_TH	Penk	ChrimsonR_kv_eyfp_AAV	1	pyramidal	2	166	13.0408	Point 33	262.627	-262.523	11.431	no cnx
2020_05_27_exp2_TH	Penk	ChrimsonR_kv_eyfp_AAV	1	pyramidal	2	166	13.0408	Point 38	263.41	-247.834	2.991	no cnx
2020_05_27_exp2_TH	Penk	ChrimsonR_kv_eyfp_AAV	0	pyramidal	2	238	19.961	Point 11	159.588	-103.465	-15.429	no cnx
2020_05_27_exp2_TH	Penk	ChrimsonR_kv_eyfp_AAV	0	pyramidal	2	238	19.961	Point 10	170.051	160.744	-15.429	no cnx
2020_05_27_exp2_TH	Penk	ChrimsonR_kv_eyfp_AAV	0	pyramidal	2	238	19.961	Point 13	159	121.748	-15.429	no cnx
2020_05_27_exp2_TH	Penk	ChrimsonR_kv_eyfp_AAV	0	pyramidal	2	238	19.961	Point 12	231.964	66.513	-15.429	no cnx
2020_05_27_exp2_TH	Penk	ChrimsonR_kv_eyfp_AAV	0	pyramidal	2	238	19.961	Point 15	170.196	-34.1286	-22.929	no cnx
2020_05_27_exp2_TH	Penk	ChrimsonR_kv_eyfp_AAV	0	pyramidal	2	238	19.961	Point 14	174.761	-31.993	-15.429	no cnx
2020_05_27_exp2_TH	Penk	ChrimsonR_kv_eyfp_AAV	0	pyramidal	2	238	19.961	Point 17	169.923	55.6524	-22.569	no cnx
2020_05_27_exp2_TH	Penk	ChrimsonR_kv_eyfp_AAV	0	pyramidal	2	238	19.961	Point 16	167.613	-6.41348	-22.929	no cnx
2020_05_27_exp2_TH	Penk	ChrimsonR_kv_eyfp_AAV	0	pyramidal	2	238	19.961	Point 19	141.5	106.429	-22.929	no cnx
2020_05_27_exp2_TH	Penk	ChrimsonR_kv_eyfp_AAV	0	pyramidal	2	238	19.961	Point 18	119.58	72.9537	-22.569	no cnx
2020_05_27_exp2_TH	Penk	ChrimsonR_kv_eyfp_AAV	0	pyramidal	2	238	19.961	Point 31	173.824	-123.559	11.431	no cnx
2020_05_27_exp2_TH	Penk	ChrimsonR_kv_eyfp_AAV	0	pyramidal	2	238	19.961	Point 30	196.09	-222.595	11.431	no cnx
2020_05_27_exp2_TH	Penk	ChrimsonR_kv_eyfp_AAV	0	pyramidal	2	238	19.961	Point 37	244.793	-24.8408	2.991	no cnx
2020_05_27_exp2_TH	Penk	ChrimsonR_kv_eyfp_AAV	0	pyramidal	2	238	19.961	Point 36	261.443	-122.887	2.991	no cnx
2020_05_27_exp2_TH	Penk	ChrimsonR_kv_eyfp_AAV	0	pyramidal	2	238	19.961	Point 35	210.634	-8.57331	2.991	no cnx
2020_05_27_exp2_TH	Penk	ChrimsonR_kv_eyfp_AAV	0	pyramidal	2	238	19.961	Point 34	227.084	-177.285	11.431	no cnx
2020_05_27_exp2_TH	Penk	ChrimsonR_kv_eyfp_AAV	0	pyramidal	2	238	19.961	Point 5	199.739	-51.5437	-6.609	no cnx
2020_05_27_exp2_TH	Penk	ChrimsonR_kv_eyfp_AAV	0	pyramidal	2	238	19.961	Point 4	270.139	152.995	-6.609	no cnx
2020_05_27_exp2_TH	Penk	ChrimsonR_kv_eyfp_AAV	0	pyramidal	2	238	19.961	Point 7	137.236	-96.6	-15.429	no cnx
2020_05_27_exp2_TH	Penk	ChrimsonR_kv_eyfp_AAV	0	pyramidal	2	238	19.961	Point 6	209.004	130.57	-6.609	no cnx
2020_05_27_exp2_TH	Penk	ChrimsonR_kv_eyfp_AAV	0	pyramidal	2	238	19.961	Point 1	116.324	-38.6307	-6.609	no cnx
2020_05_27_exp2_TH	Penk	ChrimsonR_kv_eyfp_AAV	0	pyramidal	2	238	19.961	Point 3	212.827	151.543	-6.599	no cnx
2020_05_27_exp2_TH	Penk	ChrimsonR_kv_eyfp_AAV	0	pyramidal	2	238	19.961	Point 2	228.411	18.7861	-6.609	no cnx
2020_05_27_exp2_TH	Penk	ChrimsonR_kv_eyfp_AAV	0	pyramidal	2	238	19.961	Point 9	290.563	43.278	-15.429	no cnx
2020_05_27_exp2_TH	Penk	ChrimsonR_kv_eyfp_AAV	0	pyramidal	2	238	19.961	Point 8	181.965	40.5375	-15.429	no cnx
2020_05_27_exp2_TH	Penk	ChrimsonR_kv_eyfp_AAV	0	pyramidal	2	238	19.961	Point 32	283.86	-98.1758	11.431	no cnx
2020_05_27_exp2_TH	Penk	ChrimsonR_kv_eyfp_AAV	0	pyramidal	2	238	19.961	Point 40	275.03	-179.416	2.991	no cnx
2020_05_27_exp2_TH	Penk	ChrimsonR_kv_eyfp_AAV	0	pyramidal	2	238	19.961	Point 41	203.131	-272.797	2.991	no cnx
2020_05_27_exp2_TH	Penk	ChrimsonR_kv_eyfp_AAV	0	pyramidal	2	238	19.961	Point 28	165.601	255.141	5.861	no cnx
2020_05_27_exp2_TH	Penk	ChrimsonR_kv_eyfp_AAV	0	pyramidal	2	238	19.961	Point 29	341.079	227.025	5.861	no cnx
2020_05_27_exp2_TH	Penk	ChrimsonR_kv_eyfp_AAV	0	pyramidal	2	238	19.961	Point 20	197.471	138.152	-22.569	no cnx
2020_05_27_exp2_TH	Penk	ChrimsonR_kv_eyfp_AAV	0	pyramidal	2	238	19.961	Point 21	272.06	33.8581	5.861	no cnx
2020_05_27_exp2_TH	Penk	ChrimsonR_kv_eyfp_AAV	0	pyramidal	2	238	19.961	Point 22	218.651	7.79581	5.861	no cnx
2020_05_27_exp2_TH	Penk	ChrimsonR_kv_eyfp_AAV	0	pyramidal	2	238	19.961	Point 23	140.562	-24.8715	5.861	no cnx
2020_05_27_exp2_TH	Penk	ChrimsonR_kv_eyfp_AAV	0	pyramidal	2	238	19.961	Point 24	151.718	8.29072	5.861	no cnx
2020_05_27_exp2_TH	Penk	ChrimsonR_kv_eyfp_AAV	0	pyramidal	2	238	19.961	Point 25	229.179	168.642	5.861	no cnx
2020_05_27_exp2_TH	Penk	ChrimsonR_kv_eyfp_AAV	0	pyramidal	2	238	19.961	Point 26	156.512	184.745	5.861	no cnx
2020_05_27_exp2_TH	Penk	ChrimsonR_kv_eyfp_AAV	0	pyramidal	2	238	19.961	Point 27	207.67	75.088	5.861	no cnx
2020_05_27_exp2_TH	Penk	ChrimsonR_kv_eyfp_AAV	0	pyramidal	2	238	19.961	Point 39	182.642	-63.196	2.991	no cnx
2020_05_27_exp2_TH	Penk	ChrimsonR_kv_eyfp_AAV	0	pyramidal	2	238	19.961	Point 33	263.14	-192.638	11.431	no cnx
2020_05_27_exp2_TH	Penk	ChrimsonR_kv_eyfp_AAV	0	pyramidal	2	238	19.961	Point 38	263.924	-177.949	2.991	no cnx
2020_05_27_exp1_TH	Penk	ChrimsonR_kv_eyfp_AAV	1	pyramidal	2	164	67.371	Point 5	178.751	-146.15	73.551	excitatory	0.0544341
2020_05_27_exp1_TH	Penk	ChrimsonR_kv_eyfp_AAV	1	pyramidal	2	164	67.371	Point 4	148.891	-92.4171	73.551	no cnx
2020_05_27_exp1_TH	Penk	ChrimsonR_kv_eyfp_AAV	1	pyramidal	2	164	67.371	Point 7	195.157	-166.63	73.551	no cnx
2020_05_27_exp1_TH	Penk	ChrimsonR_kv_eyfp_AAV	1	pyramidal	2	164	67.371	Point 6	203.143	-61.6668	73.551	no cnx
2020_05_27_exp1_TH	Penk	ChrimsonR_kv_eyfp_AAV	1	pyramidal	2	164	67.371	Point 1	174.896	-172.432	73.551	no cnx
2020_05_27_exp1_TH	Penk	ChrimsonR_kv_eyfp_AAV	1	pyramidal	2	164	67.371	Point 3	196.139	-149.682	73.551	no cnx
2020_05_27_exp1_TH	Penk	ChrimsonR_kv_eyfp_AAV	1	pyramidal	2	164	67.371	Point 2	217.899	-78.5251	73.551	no cnx
2020_05_27_exp1_TH	Penk	ChrimsonR_kv_eyfp_AAV	1	pyramidal	2	164	67.371	Point 9	192.06	-107.365	68.701	no cnx
2020_05_27_exp1_TH	Penk	ChrimsonR_kv_eyfp_AAV	1	pyramidal	2	164	67.371	Point 8	176.589	46.9663	68.701	no cnx
2020_05_27_exp1_TH	Penk	ChrimsonR_kv_eyfp_AAV	1	pyramidal	2	164	67.371	Point 11	190.005	-189.577	68.701	no cnx
2020_05_27_exp1_TH	Penk	ChrimsonR_kv_eyfp_AAV	1	pyramidal	2	164	67.371	Point 10	203.474	-151.839	68.701	no cnx
2020_05_27_exp1_TH	Penk	ChrimsonR_kv_eyfp_AAV	1	pyramidal	2	164	67.371	Point 12	158.809	75.5771	68.711	no cnx
2020_05_26_exp2_TH	Penk	ChrimsonR_kv_eyfp_AAV	2	pyramidal	2	135	-3.05895	Point 51	177.443	293.555	-41.099	no cnx
2020_05_26_exp2_TH	Penk	ChrimsonR_kv_eyfp_AAV	2	pyramidal	2	135	-3.05895	Point 50	123.257	268.496	-41.099	no cnx
2020_05_26_exp2_TH	Penk	ChrimsonR_kv_eyfp_AAV	2	pyramidal	2	135	-3.05895	Point 11	172.186	-113.693	8.881	direct
2020_05_26_exp2_TH	Penk	ChrimsonR_kv_eyfp_AAV	2	pyramidal	2	135	-3.05895	Point 13	161.351	4.1294	8.881	no cnx
2020_05_26_exp2_TH	Penk	ChrimsonR_kv_eyfp_AAV	2	pyramidal	2	135	-3.05895	Point 12	142.241	-160.048	8.881	no cnx
2020_05_26_exp2_TH	Penk	ChrimsonR_kv_eyfp_AAV	2	pyramidal	2	135	-3.05895	Point 15	150.275	65.4368	8.881	direct
2020_05_26_exp2_TH	Penk	ChrimsonR_kv_eyfp_AAV	2	pyramidal	2	135	-3.05895	Point 14	320.853	13.9745	8.881	no cnx
2020_05_26_exp2_TH	Penk	ChrimsonR_kv_eyfp_AAV	2	pyramidal	2	135	-3.05895	Point 17	306.493	146.792	-0.129	no cnx
2020_05_26_exp2_TH	Penk	ChrimsonR_kv_eyfp_AAV	2	pyramidal	2	135	-3.05895	Point 16	312.056	57.7228	8.881	no cnx
2020_05_26_exp2_TH	Penk	ChrimsonR_kv_eyfp_AAV	2	pyramidal	2	135	-3.05895	Point 19	161.979	-35.4122	-0.129	no cnx
2020_05_26_exp2_TH	Penk	ChrimsonR_kv_eyfp_AAV	2	pyramidal	2	135	-3.05895	Point 18	202.196	-5.35715	-0.129	no cnx
2020_05_26_exp2_TH	Penk	ChrimsonR_kv_eyfp_AAV	2	pyramidal	2	135	-3.05895	Point 31	257.544	31.0173	-18.389	no cnx
2020_05_26_exp2_TH	Penk	ChrimsonR_kv_eyfp_AAV	2	pyramidal	2	135	-3.05895	Point 30	124.063	-10.2312	-18.389	direct
2020_05_26_exp2_TH	Penk	ChrimsonR_kv_eyfp_AAV	2	pyramidal	2	135	-3.05895	Point 37	109.777	40.2494	-29.339	no cnx
2020_05_26_exp2_TH	Penk	ChrimsonR_kv_eyfp_AAV	2	pyramidal	2	135	-3.05895	Point 35	139.073	75.047	-18.389	no cnx
2020_05_26_exp2_TH	Penk	ChrimsonR_kv_eyfp_AAV	2	pyramidal	2	135	-3.05895	Point 34	111.134	67.2766	-18.389	no cnx
2020_05_26_exp2_TH	Penk	ChrimsonR_kv_eyfp_AAV	2	pyramidal	2	135	-3.05895	Point 32	123.53	105.983	-18.389	no cnx
2020_05_26_exp2_TH	Penk	ChrimsonR_kv_eyfp_AAV	2	pyramidal	2	135	-3.05895	Point 48	164.208	313.498	-41.099	no cnx
2020_05_26_exp2_TH	Penk	ChrimsonR_kv_eyfp_AAV	2	pyramidal	2	135	-3.05895	Point 49	219.138	417.149	-41.099	no cnx
2020_05_26_exp2_TH	Penk	ChrimsonR_kv_eyfp_AAV	2	pyramidal	2	135	-3.05895	Point 42	164.896	254.795	-29.339	no cnx
2020_05_26_exp2_TH	Penk	ChrimsonR_kv_eyfp_AAV	2	pyramidal	2	135	-3.05895	Point 43	222.011	151.01	-28.709	no cnx
2020_05_26_exp2_TH	Penk	ChrimsonR_kv_eyfp_AAV	2	pyramidal	2	135	-3.05895	Point 40	151.184	185.654	-29.339	no cnx
2020_05_26_exp2_TH	Penk	ChrimsonR_kv_eyfp_AAV	2	pyramidal	2	135	-3.05895	Point 41	121.519	136.372	-29.339	no cnx
2020_05_26_exp2_TH	Penk	ChrimsonR_kv_eyfp_AAV	2	pyramidal	2	135	-3.05895	Point 46	109.673	122.476	-38.199	no cnx
2020_05_26_exp2_TH	Penk	ChrimsonR_kv_eyfp_AAV	2	pyramidal	2	135	-3.05895	Point 47	141.953	270.974	-38.199	no cnx
2020_05_26_exp2_TH	Penk	ChrimsonR_kv_eyfp_AAV	2	pyramidal	2	135	-3.05895	Point 44	124.928	294.936	-29.339	no cnx
2020_05_26_exp2_TH	Penk	ChrimsonR_kv_eyfp_AAV	2	pyramidal	2	135	-3.05895	Point 28	102.293	-20.1167	-18.389	no cnx
2020_05_26_exp2_TH	Penk	ChrimsonR_kv_eyfp_AAV	2	pyramidal	2	135	-3.05895	Point 29	155.517	-102.493	-18.389	no cnx
2020_05_26_exp2_TH	Penk	ChrimsonR_kv_eyfp_AAV	2	pyramidal	2	135	-3.05895	Point 20	156.949	-123.479	-0.129	no cnx
2020_05_26_exp2_TH	Penk	ChrimsonR_kv_eyfp_AAV	2	pyramidal	2	135	-3.05895	Point 21	129.449	-95.4973	-0.129	no cnx
2020_05_26_exp2_TH	Penk	ChrimsonR_kv_eyfp_AAV	2	pyramidal	2	135	-3.05895	Point 22	135.489	59.5055	-0.129	no cnx
2020_05_26_exp2_TH	Penk	ChrimsonR_kv_eyfp_AAV	2	pyramidal	2	135	-3.05895	Point 23	148.531	-37.7736	-0.129	no cnx
2020_05_26_exp2_TH	Penk	ChrimsonR_kv_eyfp_AAV	2	pyramidal	2	135	-3.05895	Point 24	193.031	-48.5576	-3.349	no cnx
2020_05_26_exp2_TH	Penk	ChrimsonR_kv_eyfp_AAV	2	pyramidal	2	135	-3.05895	Point 25	205.657	-34.4652	-6.149	no cnx
2020_05_26_exp2_TH	Penk	ChrimsonR_kv_eyfp_AAV	2	pyramidal	2	135	-3.05895	Point 26	108.977	-65.5288	-6.149	no cnx
2020_05_26_exp2_TH	Penk	ChrimsonR_kv_eyfp_AAV	2	pyramidal	2	135	-3.05895	Point 27	124.54	61.331	-3.349	no cnx
2020_05_26_exp2_TH	Penk	ChrimsonR_kv_eyfp_AAV	2	pyramidal	2	135	-3.05895	Point 39	173.559	84.1569	-29.339	no cnx
2020_05_26_exp2_TH	Penk	ChrimsonR_kv_eyfp_AAV	2	pyramidal	2	135	-3.05895	Point 33	130.238	-25.6874	-18.389	no cnx
2020_05_26_exp2_TH	Penk	ChrimsonR_kv_eyfp_AAV	2	pyramidal	2	135	-3.05895	Point 38	209.696	96.311	-29.339	no cnx
2020_05_26_exp2_TH	Penk	ChrimsonR_kv_eyfp_AAV	1	pyramidal	2	146	15.4418	Point 51	168.676	424.172	-41.099	no cnx
2020_05_26_exp2_TH	Penk	ChrimsonR_kv_eyfp_AAV	1	pyramidal	2	146	15.4418	Point 50	114.491	399.113	-41.099	no cnx
2020_05_26_exp2_TH	Penk	ChrimsonR_kv_eyfp_AAV	1	pyramidal	2	146	15.4418	Point 13	152.584	134.746	8.881	no cnx
2020_05_26_exp2_TH	Penk	ChrimsonR_kv_eyfp_AAV	1	pyramidal	2	146	15.4418	Point 12	133.474	-29.4312	8.881	no cnx
2020_05_26_exp2_TH	Penk	ChrimsonR_kv_eyfp_AAV	1	pyramidal	2	146	15.4418	Point 15	141.508	196.054	8.881	no cnx
2020_05_26_exp2_TH	Penk	ChrimsonR_kv_eyfp_AAV	1	pyramidal	2	146	15.4418	Point 14	312.086	144.591	8.881	no cnx
2020_05_26_exp2_TH	Penk	ChrimsonR_kv_eyfp_AAV	1	pyramidal	2	146	15.4418	Point 17	297.727	277.409	-0.129	no cnx
2020_05_26_exp2_TH	Penk	ChrimsonR_kv_eyfp_AAV	1	pyramidal	2	146	15.4418	Point 16	303.29	188.34	8.881	no cnx
2020_05_26_exp2_TH	Penk	ChrimsonR_kv_eyfp_AAV	1	pyramidal	2	146	15.4418	Point 19	153.212	95.2048	-0.129	excitatory	0.0969945
2020_05_26_exp2_TH	Penk	ChrimsonR_kv_eyfp_AAV	1	pyramidal	2	146	15.4418	Point 18	193.429	125.26	-0.129	no cnx
2020_05_26_exp2_TH	Penk	ChrimsonR_kv_eyfp_AAV	1	pyramidal	2	146	15.4418	Point 31	248.777	161.634	-18.389	no cnx
2020_05_26_exp2_TH	Penk	ChrimsonR_kv_eyfp_AAV	1	pyramidal	2	146	15.4418	Point 37	101.01	170.866	-29.339	no cnx
2020_05_26_exp2_TH	Penk	ChrimsonR_kv_eyfp_AAV	1	pyramidal	2	146	15.4418	Point 35	130.307	205.664	-18.389	no cnx
2020_05_26_exp2_TH	Penk	ChrimsonR_kv_eyfp_AAV	1	pyramidal	2	146	15.4418	Point 34	102.367	197.894	-18.389	no cnx
2020_05_26_exp2_TH	Penk	ChrimsonR_kv_eyfp_AAV	1	pyramidal	2	146	15.4418	Point 32	114.763	236.6	-18.389	no cnx
2020_05_26_exp2_TH	Penk	ChrimsonR_kv_eyfp_AAV	1	pyramidal	2	146	15.4418	Point 48	155.441	444.115	-41.099	no cnx
2020_05_26_exp2_TH	Penk	ChrimsonR_kv_eyfp_AAV	1	pyramidal	2	146	15.4418	Point 49	210.372	547.766	-41.099	no cnx
2020_05_26_exp2_TH	Penk	ChrimsonR_kv_eyfp_AAV	1	pyramidal	2	146	15.4418	Point 42	156.129	385.412	-29.339	no cnx
2020_05_26_exp2_TH	Penk	ChrimsonR_kv_eyfp_AAV	1	pyramidal	2	146	15.4418	Point 43	213.244	281.627	-28.709	no cnx
2020_05_26_exp2_TH	Penk	ChrimsonR_kv_eyfp_AAV	1	pyramidal	2	146	15.4418	Point 40	142.417	316.271	-29.339	no cnx
2020_05_26_exp2_TH	Penk	ChrimsonR_kv_eyfp_AAV	1	pyramidal	2	146	15.4418	Point 41	112.752	266.989	-29.339	no cnx
2020_05_26_exp2_TH	Penk	ChrimsonR_kv_eyfp_AAV	1	pyramidal	2	146	15.4418	Point 46	100.906	253.093	-38.199	no cnx
2020_05_26_exp2_TH	Penk	ChrimsonR_kv_eyfp_AAV	1	pyramidal	2	146	15.4418	Point 47	133.186	401.591	-38.199	no cnx
2020_05_26_exp2_TH	Penk	ChrimsonR_kv_eyfp_AAV	1	pyramidal	2	146	15.4418	Point 44	116.162	425.553	-29.339	no cnx
2020_05_26_exp2_TH	Penk	ChrimsonR_kv_eyfp_AAV	1	pyramidal	2	146	15.4418	Point 28	93.5264	110.5	-18.389	no cnx
2020_05_26_exp2_TH	Penk	ChrimsonR_kv_eyfp_AAV	1	pyramidal	2	146	15.4418	Point 29	146.75	28.1241	-18.389	direct
2020_05_26_exp2_TH	Penk	ChrimsonR_kv_eyfp_AAV	1	pyramidal	2	146	15.4418	Point 20	148.183	7.13831	-0.129	direct
2020_05_26_exp2_TH	Penk	ChrimsonR_kv_eyfp_AAV	1	pyramidal	2	146	15.4418	Point 21	120.682	35.1197	-0.129	direct
2020_05_26_exp2_TH	Penk	ChrimsonR_kv_eyfp_AAV	1	pyramidal	2	146	15.4418	Point 22	126.723	190.122	-0.129	excitatory	0.0639522
2020_05_26_exp2_TH	Penk	ChrimsonR_kv_eyfp_AAV	1	pyramidal	2	146	15.4418	Point 23	139.764	92.8434	-0.129	direct
2020_05_26_exp2_TH	Penk	ChrimsonR_kv_eyfp_AAV	1	pyramidal	2	146	15.4418	Point 24	184.265	82.0594	-3.349	excitatory	0.108946
2020_05_26_exp2_TH	Penk	ChrimsonR_kv_eyfp_AAV	1	pyramidal	2	146	15.4418	Point 25	196.891	96.1518	-6.149	direct
2020_05_26_exp2_TH	Penk	ChrimsonR_kv_eyfp_AAV	1	pyramidal	2	146	15.4418	Point 26	100.21	65.0882	-6.149	no cnx
2020_05_26_exp2_TH	Penk	ChrimsonR_kv_eyfp_AAV	1	pyramidal	2	146	15.4418	Point 27	115.774	191.948	-3.349	no cnx
2020_05_26_exp2_TH	Penk	ChrimsonR_kv_eyfp_AAV	1	pyramidal	2	146	15.4418	Point 39	164.793	214.774	-29.339	no cnx
2020_05_26_exp2_TH	Penk	ChrimsonR_kv_eyfp_AAV	1	pyramidal	2	146	15.4418	Point 33	121.471	104.93	-18.389	no cnx
2020_05_26_exp2_TH	Penk	ChrimsonR_kv_eyfp_AAV	1	pyramidal	2	146	15.4418	Point 38	200.929	226.928	-29.339	no cnx
2020_05_22_exp2_TH	Rorb	Ai167	3	pyramidal	2	227	39.5612	Point 5	356.998	178.64	34.071	no cnx
2020_05_22_exp2_TH	Rorb	Ai167	3	pyramidal	2	227	39.5612	Point 4	401.706	38.4416	39.041	no cnx
2020_05_22_exp2_TH	Rorb	Ai167	3	pyramidal	2	227	39.5612	Point 7	338.535	112.378	28.331	no cnx
2020_05_22_exp2_TH	Rorb	Ai167	3	pyramidal	2	227	39.5612	Point 6	352.789	28.0371	34.071	no cnx
2020_05_22_exp2_TH	Rorb	Ai167	3	pyramidal	2	227	39.5612	Point 1	400.817	44.355	58.341	no cnx
2020_05_22_exp2_TH	Rorb	Ai167	3	pyramidal	2	227	39.5612	Point 3	386.595	141.401	39.041	no cnx
2020_05_22_exp2_TH	Rorb	Ai167	3	pyramidal	2	227	39.5612	Point 2	332.325	42.392	48.541	no cnx
2020_05_22_exp2_TH	Rorb	Ai167	3	pyramidal	2	227	39.5612	Point 9	395.464	-41.697	28.331	no cnx
2020_05_22_exp2_TH	Rorb	Ai167	3	pyramidal	2	227	39.5612	Point 8	331.115	32.9714	28.331	no cnx
2020_05_22_exp2_TH	Rorb	Ai167	3	pyramidal	2	227	39.5612	Point 11	401.401	148.678	20.181	excitatory	0.14924
2020_05_22_exp2_TH	Rorb	Ai167	3	pyramidal	2	227	39.5612	Point 10	442.675	249.475	23.311	no cnx
2020_05_22_exp2_TH	Rorb	Ai167	3	pyramidal	2	227	39.5612	Point 13	445.084	36.3802	21.701	no cnx
2020_05_22_exp2_TH	Rorb	Ai167	3	pyramidal	2	227	39.5612	Point 12	489.387	47.6442	21.701	no cnx
2020_05_22_exp2_TH	Rorb	Ai167	3	pyramidal	2	227	39.5612	Point 15	449.123	80.3975	7.161	excitatory	0.782069
2020_05_22_exp2_TH	Rorb	Ai167	3	pyramidal	2	227	39.5612	Point 14	324.653	134.923	7.161	no cnx
2020_05_22_exp2_TH	Rorb	Ai167	3	pyramidal	2	227	39.5612	Point 17	342.475	-25.491	7.161	excitatory	0.655237
2020_05_22_exp2_TH	Rorb	Ai167	3	pyramidal	2	227	39.5612	Point 16	452.047	6.11443	7.161	no cnx
2020_05_22_exp2_TH	Rorb	Ai167	3	pyramidal	2	227	39.5612	Point 19	482.175	111.768	9.101	no cnx
2020_05_22_exp2_TH	Rorb	Ai167	3	pyramidal	2	227	39.5612	Point 18	347.291	128.353	9.101	no cnx
2020_05_22_exp2_TH	Rorb	Ai167	3	pyramidal	2	227	39.5612	Point 20	433.038	17.236	9.101	no cnx
2020_05_22_exp2_TH	Rorb	Ai167	2	pyramidal	2	253	33.031	Point 5	351.232	171.475	34.071	no cnx
2020_05_22_exp2_TH	Rorb	Ai167	2	pyramidal	2	253	33.031	Point 4	395.941	31.2766	39.041	no cnx
2020_05_22_exp2_TH	Rorb	Ai167	2	pyramidal	2	253	33.031	Point 7	332.769	105.213	28.331	no cnx
2020_05_22_exp2_TH	Rorb	Ai167	2	pyramidal	2	253	33.031	Point 6	347.023	20.8722	34.071	no cnx
2020_05_22_exp2_TH	Rorb	Ai167	2	pyramidal	2	253	33.031	Point 1	395.051	37.19	58.341	no cnx
2020_05_22_exp2_TH	Rorb	Ai167	2	pyramidal	2	253	33.031	Point 3	380.829	134.236	39.041	no cnx
2020_05_22_exp2_TH	Rorb	Ai167	2	pyramidal	2	253	33.031	Point 2	326.559	35.2271	48.541	no cnx
2020_05_22_exp2_TH	Rorb	Ai167	2	pyramidal	2	253	33.031	Point 9	389.698	-48.862	28.331	no cnx
2020_05_22_exp2_TH	Rorb	Ai167	2	pyramidal	2	253	33.031	Point 8	325.349	25.8065	28.331	no cnx
2020_05_22_exp2_TH	Rorb	Ai167	2	pyramidal	2	253	33.031	Point 11	395.635	141.513	20.181	no cnx
2020_05_22_exp2_TH	Rorb	Ai167	2	pyramidal	2	253	33.031	Point 10	436.909	242.31	23.311	no cnx
2020_05_22_exp2_TH	Rorb	Ai167	2	pyramidal	2	253	33.031	Point 13	439.318	29.2153	21.701	no cnx
2020_05_22_exp2_TH	Rorb	Ai167	2	pyramidal	2	253	33.031	Point 12	483.621	40.4793	21.701	no cnx
2020_05_22_exp2_TH	Rorb	Ai167	2	pyramidal	2	253	33.031	Point 15	443.357	73.2326	7.161	no cnx
2020_05_22_exp2_TH	Rorb	Ai167	2	pyramidal	2	253	33.031	Point 14	318.887	127.758	7.161	no cnx
2020_05_22_exp2_TH	Rorb	Ai167	2	pyramidal	2	253	33.031	Point 17	336.71	-32.6559	7.161	no cnx
2020_05_22_exp2_TH	Rorb	Ai167	2	pyramidal	2	253	33.031	Point 16	446.281	-1.05049	7.161	excitatory	0.27332
2020_05_22_exp2_TH	Rorb	Ai167	2	pyramidal	2	253	33.031	Point 19	476.409	104.603	9.101	no cnx
2020_05_22_exp2_TH	Rorb	Ai167	2	pyramidal	2	253	33.031	Point 18	341.525	121.188	9.101	no cnx
2020_05_22_exp2_TH	Rorb	Ai167	2	pyramidal	2	253	33.031	Point 20	427.273	10.0711	9.101	no cnx
2019_08_28_exp1_TH	Ntsr1	Ai167	3	pyramidal	2	146	475.636	Point 11	914.654	-713.028	242.316	no cnx
2019_08_28_exp1_TH	Ntsr1	Ai167	3	pyramidal	2	146	475.636	Point 10	950.265	-670.818	242.316	no cnx
2019_08_28_exp1_TH	Ntsr1	Ai167	3	pyramidal	2	146	475.636	Point 13	836.987	-800.705	242.316	no cnx
2019_08_28_exp1_TH	Ntsr1	Ai167	3	pyramidal	2	146	475.636	Point 12	812.437	-665.751	242.316	no cnx
2019_08_28_exp1_TH	Ntsr1	Ai167	3	pyramidal	2	146	475.636	Point 15	888.918	-809.499	228.046	no cnx
2019_08_28_exp1_TH	Ntsr1	Ai167	3	pyramidal	2	146	475.636	Point 14	820.374	-748.8	228.046	no cnx
2019_08_28_exp1_TH	Ntsr1	Ai167	3	pyramidal	2	146	475.636	Point 17	817.8	-779.84	228.046	no cnx
2019_08_28_exp1_TH	Ntsr1	Ai167	3	pyramidal	2	146	475.636	Point 16	938.334	-788.878	228.046	no cnx
2019_08_28_exp1_TH	Ntsr1	Ai167	3	pyramidal	2	146	475.636	Point 19	917.276	-660.996	228.046	no cnx
2019_08_28_exp1_TH	Ntsr1	Ai167	3	pyramidal	2	146	475.636	Point 18	821.349	-671.131	228.046	no cnx
2019_08_28_exp1_TH	Ntsr1	Ai167	3	pyramidal	2	146	475.636	Point 31	796.183	-807.615	204.706	no cnx
2019_08_28_exp1_TH	Ntsr1	Ai167	3	pyramidal	2	146	475.636	Point 30	930.858	-798.122	204.706	no cnx
2019_08_28_exp1_TH	Ntsr1	Ai167	3	pyramidal	2	146	475.636	Point 34	855.035	-760.376	204.706	no cnx
2019_08_28_exp1_TH	Ntsr1	Ai167	3	pyramidal	2	146	475.636	Point 5	867.721	-633.355	237.496	no cnx
2019_08_28_exp1_TH	Ntsr1	Ai167	3	pyramidal	2	146	475.636	Point 4	835.523	-606.976	237.496	no cnx
2019_08_28_exp1_TH	Ntsr1	Ai167	3	pyramidal	2	146	475.636	Point 7	865.649	-595.338	237.496	no cnx
2019_08_28_exp1_TH	Ntsr1	Ai167	3	pyramidal	2	146	475.636	Point 6	875.931	-675.454	237.496	no cnx
2019_08_28_exp1_TH	Ntsr1	Ai167	3	pyramidal	2	146	475.636	Point 1	922.57	-464.268	266.006	no cnx
2019_08_28_exp1_TH	Ntsr1	Ai167	3	pyramidal	2	146	475.636	Point 3	735.288	-397.165	266.006	no cnx
2019_08_28_exp1_TH	Ntsr1	Ai167	3	pyramidal	2	146	475.636	Point 2	840.568	-444.661	266.006	no cnx
2019_08_28_exp1_TH	Ntsr1	Ai167	3	pyramidal	2	146	475.636	Point 9	888.296	-641.544	237.496	no cnx
2019_08_28_exp1_TH	Ntsr1	Ai167	3	pyramidal	2	146	475.636	Point 8	904.016	-507.336	237.496	no cnx
2019_08_28_exp1_TH	Ntsr1	Ai167	3	pyramidal	2	146	475.636	Point 32	908.496	-826.52	204.706	no cnx
2019_08_28_exp1_TH	Ntsr1	Ai167	3	pyramidal	2	146	475.636	Point 28	892.59	-829.207	204.706	no cnx
2019_08_28_exp1_TH	Ntsr1	Ai167	3	pyramidal	2	146	475.636	Point 29	933.733	-870.847	204.706	no cnx
2019_08_28_exp1_TH	Ntsr1	Ai167	3	pyramidal	2	146	475.636	Point 20	924.878	-789.289	224.276	no cnx
2019_08_28_exp1_TH	Ntsr1	Ai167	3	pyramidal	2	146	475.636	Point 21	889.319	-791.367	224.276	no cnx
2019_08_28_exp1_TH	Ntsr1	Ai167	3	pyramidal	2	146	475.636	Point 22	819.958	-661.664	224.276	no cnx
2019_08_28_exp1_TH	Ntsr1	Ai167	3	pyramidal	2	146	475.636	Point 23	863.757	-833.667	207.026	no cnx
2019_08_28_exp1_TH	Ntsr1	Ai167	3	pyramidal	2	146	475.636	Point 24	812.107	-860.345	207.026	no cnx
2019_08_28_exp1_TH	Ntsr1	Ai167	3	pyramidal	2	146	475.636	Point 25	861.176	-823.715	207.026	no cnx
2019_08_28_exp1_TH	Ntsr1	Ai167	3	pyramidal	2	146	475.636	Point 26	910.491	-796.286	207.026	no cnx
2019_08_28_exp1_TH	Ntsr1	Ai167	3	pyramidal	2	146	475.636	Point 27	950.022	-865.683	207.026	no cnx
2019_08_28_exp1_TH	Ntsr1	Ai167	3	pyramidal	2	146	475.636	Point 33	804.121	-814.659	204.706	no cnx
2019_08_28_exp1_TH	Ntsr1	Ai167	1	pyramidal	2	103	475.766	Point 11	906.421	-485.824	242.316	no cnx
2019_08_28_exp1_TH	Ntsr1	Ai167	1	pyramidal	2	103	475.766	Point 10	942.032	-443.614	242.316	no cnx
2019_08_28_exp1_TH	Ntsr1	Ai167	1	pyramidal	2	103	475.766	Point 13	828.754	-573.501	242.316	no cnx
2019_08_28_exp1_TH	Ntsr1	Ai167	1	pyramidal	2	103	475.766	Point 12	804.204	-438.548	242.316	no cnx
2019_08_28_exp1_TH	Ntsr1	Ai167	1	pyramidal	2	103	475.766	Point 15	880.685	-582.295	228.046	no cnx
2019_08_28_exp1_TH	Ntsr1	Ai167	1	pyramidal	2	103	475.766	Point 14	812.141	-521.596	228.046	no cnx
2019_08_28_exp1_TH	Ntsr1	Ai167	1	pyramidal	2	103	475.766	Point 17	809.567	-552.636	228.046	no cnx
2019_08_28_exp1_TH	Ntsr1	Ai167	1	pyramidal	2	103	475.766	Point 16	930.101	-561.674	228.046	no cnx
2019_08_28_exp1_TH	Ntsr1	Ai167	1	pyramidal	2	103	475.766	Point 19	909.043	-433.792	228.046	no cnx
2019_08_28_exp1_TH	Ntsr1	Ai167	1	pyramidal	2	103	475.766	Point 18	813.116	-443.927	228.046	no cnx
2019_08_28_exp1_TH	Ntsr1	Ai167	1	pyramidal	2	103	475.766	Point 31	787.95	-580.411	204.706	no cnx
2019_08_28_exp1_TH	Ntsr1	Ai167	1	pyramidal	2	103	475.766	Point 30	922.625	-570.918	204.706	no cnx
2019_08_28_exp1_TH	Ntsr1	Ai167	1	pyramidal	2	103	475.766	Point 34	846.802	-533.172	204.706	no cnx
2019_08_28_exp1_TH	Ntsr1	Ai167	1	pyramidal	2	103	475.766	Point 5	859.488	-406.151	237.496	no cnx
2019_08_28_exp1_TH	Ntsr1	Ai167	1	pyramidal	2	103	475.766	Point 4	827.29	-379.772	237.496	no cnx
2019_08_28_exp1_TH	Ntsr1	Ai167	1	pyramidal	2	103	475.766	Point 7	857.416	-368.134	237.496	no cnx
2019_08_28_exp1_TH	Ntsr1	Ai167	1	pyramidal	2	103	475.766	Point 6	867.698	-448.25	237.496	no cnx
2019_08_28_exp1_TH	Ntsr1	Ai167	1	pyramidal	2	103	475.766	Point 1	914.337	-237.064	266.006	no cnx
2019_08_28_exp1_TH	Ntsr1	Ai167	1	pyramidal	2	103	475.766	Point 3	727.055	-169.961	266.006	no cnx
2019_08_28_exp1_TH	Ntsr1	Ai167	1	pyramidal	2	103	475.766	Point 2	832.335	-217.457	266.006	no cnx
2019_08_28_exp1_TH	Ntsr1	Ai167	1	pyramidal	2	103	475.766	Point 9	880.063	-414.34	237.496	no cnx
2019_08_28_exp1_TH	Ntsr1	Ai167	1	pyramidal	2	103	475.766	Point 8	895.783	-280.132	237.496	no cnx
2019_08_28_exp1_TH	Ntsr1	Ai167	1	pyramidal	2	103	475.766	Point 32	900.263	-599.316	204.706	no cnx
2019_08_28_exp1_TH	Ntsr1	Ai167	1	pyramidal	2	103	475.766	Point 28	884.357	-602.003	204.706	no cnx
2019_08_28_exp1_TH	Ntsr1	Ai167	1	pyramidal	2	103	475.766	Point 29	925.5	-643.643	204.706	no cnx
2019_08_28_exp1_TH	Ntsr1	Ai167	1	pyramidal	2	103	475.766	Point 20	916.645	-562.085	224.276	no cnx
2019_08_28_exp1_TH	Ntsr1	Ai167	1	pyramidal	2	103	475.766	Point 21	881.086	-564.164	224.276	no cnx
2019_08_28_exp1_TH	Ntsr1	Ai167	1	pyramidal	2	103	475.766	Point 22	811.725	-434.46	224.276	no cnx
2019_08_28_exp1_TH	Ntsr1	Ai167	1	pyramidal	2	103	475.766	Point 23	855.524	-606.463	207.026	no cnx
2019_08_28_exp1_TH	Ntsr1	Ai167	1	pyramidal	2	103	475.766	Point 24	803.874	-633.141	207.026	no cnx
2019_08_28_exp1_TH	Ntsr1	Ai167	1	pyramidal	2	103	475.766	Point 25	852.943	-596.511	207.026	no cnx
2019_08_28_exp1_TH	Ntsr1	Ai167	1	pyramidal	2	103	475.766	Point 26	902.258	-569.082	207.026	no cnx
2019_08_28_exp1_TH	Ntsr1	Ai167	1	pyramidal	2	103	475.766	Point 27	941.789	-638.479	207.026	no cnx
2019_08_28_exp1_TH	Ntsr1	Ai167	1	pyramidal	2	103	475.766	Point 33	795.888	-587.455	204.706	no cnx
2019_08_28_exp1_TH	Ntsr1	Ai167	0	pyramidal	2	159	475.866	Point 11	920.218	-423.94	242.316	no cnx
2019_08_28_exp1_TH	Ntsr1	Ai167	0	pyramidal	2	159	475.866	Point 10	955.829	-381.729	242.316	no cnx
2019_08_28_exp1_TH	Ntsr1	Ai167	0	pyramidal	2	159	475.866	Point 13	842.551	-511.616	242.316	no cnx
2019_08_28_exp1_TH	Ntsr1	Ai167	0	pyramidal	2	159	475.866	Point 12	818.001	-376.663	242.316	no cnx
2019_08_28_exp1_TH	Ntsr1	Ai167	0	pyramidal	2	159	475.866	Point 15	894.482	-520.41	228.046	no cnx
2019_08_28_exp1_TH	Ntsr1	Ai167	0	pyramidal	2	159	475.866	Point 14	825.938	-459.711	228.046	no cnx
2019_08_28_exp1_TH	Ntsr1	Ai167	0	pyramidal	2	159	475.866	Point 17	823.364	-490.751	228.046	no cnx
2019_08_28_exp1_TH	Ntsr1	Ai167	0	pyramidal	2	159	475.866	Point 16	943.899	-499.789	228.046	no cnx
2019_08_28_exp1_TH	Ntsr1	Ai167	0	pyramidal	2	159	475.866	Point 19	922.84	-371.907	228.046	no cnx
2019_08_28_exp1_TH	Ntsr1	Ai167	0	pyramidal	2	159	475.866	Point 18	826.913	-382.042	228.046	no cnx
2019_08_28_exp1_TH	Ntsr1	Ai167	0	pyramidal	2	159	475.866	Point 31	801.747	-518.526	204.706	no cnx
2019_08_28_exp1_TH	Ntsr1	Ai167	0	pyramidal	2	159	475.866	Point 30	936.422	-509.034	204.706	no cnx
2019_08_28_exp1_TH	Ntsr1	Ai167	0	pyramidal	2	159	475.866	Point 34	860.599	-471.287	204.706	no cnx
2019_08_28_exp1_TH	Ntsr1	Ai167	0	pyramidal	2	159	475.866	Point 5	873.285	-344.266	237.496	no cnx
2019_08_28_exp1_TH	Ntsr1	Ai167	0	pyramidal	2	159	475.866	Point 4	841.087	-317.887	237.496	no cnx
2019_08_28_exp1_TH	Ntsr1	Ai167	0	pyramidal	2	159	475.866	Point 7	871.213	-306.249	237.496	no cnx
2019_08_28_exp1_TH	Ntsr1	Ai167	0	pyramidal	2	159	475.866	Point 6	881.496	-386.365	237.496	no cnx
2019_08_28_exp1_TH	Ntsr1	Ai167	0	pyramidal	2	159	475.866	Point 1	928.134	-175.179	266.006	no cnx
2019_08_28_exp1_TH	Ntsr1	Ai167	0	pyramidal	2	159	475.866	Point 3	740.852	-108.076	266.006	no cnx
2019_08_28_exp1_TH	Ntsr1	Ai167	0	pyramidal	2	159	475.866	Point 2	846.132	-155.572	266.006	no cnx
2019_08_28_exp1_TH	Ntsr1	Ai167	0	pyramidal	2	159	475.866	Point 9	893.86	-352.455	237.496	no cnx
2019_08_28_exp1_TH	Ntsr1	Ai167	0	pyramidal	2	159	475.866	Point 8	909.58	-218.247	237.496	no cnx
2019_08_28_exp1_TH	Ntsr1	Ai167	0	pyramidal	2	159	475.866	Point 32	914.06	-537.432	204.706	no cnx
2019_08_28_exp1_TH	Ntsr1	Ai167	0	pyramidal	2	159	475.866	Point 28	898.154	-540.118	204.706	no cnx
2019_08_28_exp1_TH	Ntsr1	Ai167	0	pyramidal	2	159	475.866	Point 29	939.297	-581.758	204.706	no cnx
2019_08_28_exp1_TH	Ntsr1	Ai167	0	pyramidal	2	159	475.866	Point 20	930.442	-500.2	224.276	no cnx
2019_08_28_exp1_TH	Ntsr1	Ai167	0	pyramidal	2	159	475.866	Point 21	894.883	-502.279	224.276	no cnx
2019_08_28_exp1_TH	Ntsr1	Ai167	0	pyramidal	2	159	475.866	Point 22	825.522	-372.575	224.276	no cnx
2019_08_28_exp1_TH	Ntsr1	Ai167	0	pyramidal	2	159	475.866	Point 23	869.321	-544.579	207.026	no cnx
2019_08_28_exp1_TH	Ntsr1	Ai167	0	pyramidal	2	159	475.866	Point 24	817.671	-571.256	207.026	no cnx
2019_08_28_exp1_TH	Ntsr1	Ai167	0	pyramidal	2	159	475.866	Point 25	866.74	-534.626	207.026	no cnx
2019_08_28_exp1_TH	Ntsr1	Ai167	0	pyramidal	2	159	475.866	Point 26	916.055	-507.197	207.026	no cnx
2019_08_28_exp1_TH	Ntsr1	Ai167	0	pyramidal	2	159	475.866	Point 27	955.586	-576.594	207.026	no cnx
2019_08_28_exp1_TH	Ntsr1	Ai167	0	pyramidal	2	159	475.866	Point 33	809.685	-525.57	204.706	no cnx
2019_08_26_exp2_TH	Tlx3	ChrimsonR_kv_eyfp_AAV	3	pyramidal	2	216	101.186	Point 51	455.196	174.171	68.416	no cnx
2019_08_26_exp2_TH	Tlx3	ChrimsonR_kv_eyfp_AAV	3	pyramidal	2	216	101.186	Point 50	489.283	174.241	68.416	no cnx
2019_08_26_exp2_TH	Tlx3	ChrimsonR_kv_eyfp_AAV	3	pyramidal	2	216	101.186	Point 11	474.635	125.623	86.686	no cnx
2019_08_26_exp2_TH	Tlx3	ChrimsonR_kv_eyfp_AAV	3	pyramidal	2	216	101.186	Point 10	525.683	81.4759	90.856	no cnx
2019_08_26_exp2_TH	Tlx3	ChrimsonR_kv_eyfp_AAV	3	pyramidal	2	216	101.186	Point 13	545.715	295.567	86.686	excitatory	0.275913
2019_08_26_exp2_TH	Tlx3	ChrimsonR_kv_eyfp_AAV	3	pyramidal	2	216	101.186	Point 12	505.021	258.2	86.686	no cnx
2019_08_26_exp2_TH	Tlx3	ChrimsonR_kv_eyfp_AAV	3	pyramidal	2	216	101.186	Point 15	475.009	35.1808	86.686	no cnx
2019_08_26_exp2_TH	Tlx3	ChrimsonR_kv_eyfp_AAV	3	pyramidal	2	216	101.186	Point 14	618.051	225.866	86.686	no cnx
2019_08_26_exp2_TH	Tlx3	ChrimsonR_kv_eyfp_AAV	3	pyramidal	2	216	101.186	Point 17	444.114	68.7056	86.686	no cnx
2019_08_26_exp2_TH	Tlx3	ChrimsonR_kv_eyfp_AAV	3	pyramidal	2	216	101.186	Point 16	550.746	245.071	86.686	no cnx
2019_08_26_exp2_TH	Tlx3	ChrimsonR_kv_eyfp_AAV	3	pyramidal	2	216	101.186	Point 19	489.55	273.031	86.686	no cnx
2019_08_26_exp2_TH	Tlx3	ChrimsonR_kv_eyfp_AAV	3	pyramidal	2	216	101.186	Point 18	516.151	286.43	86.686	no cnx
2019_08_26_exp2_TH	Tlx3	ChrimsonR_kv_eyfp_AAV	3	pyramidal	2	216	101.186	Point 31	480.672	365.75	80.996	no cnx
2019_08_26_exp2_TH	Tlx3	ChrimsonR_kv_eyfp_AAV	3	pyramidal	2	216	101.186	Point 30	457.329	227.813	80.996	no cnx
2019_08_26_exp2_TH	Tlx3	ChrimsonR_kv_eyfp_AAV	3	pyramidal	2	216	101.186	Point 37	498.62	231.628	80.996	no cnx
2019_08_26_exp2_TH	Tlx3	ChrimsonR_kv_eyfp_AAV	3	pyramidal	2	216	101.186	Point 36	494.763	442.093	80.996	no cnx
2019_08_26_exp2_TH	Tlx3	ChrimsonR_kv_eyfp_AAV	3	pyramidal	2	216	101.186	Point 35	497.84	251.719	80.996	no cnx
2019_08_26_exp2_TH	Tlx3	ChrimsonR_kv_eyfp_AAV	3	pyramidal	2	216	101.186	Point 34	482.565	346.76	80.996	no cnx
2019_08_26_exp2_TH	Tlx3	ChrimsonR_kv_eyfp_AAV	3	pyramidal	2	216	101.186	Point 5	528.139	51.3217	90.856	no cnx
2019_08_26_exp2_TH	Tlx3	ChrimsonR_kv_eyfp_AAV	3	pyramidal	2	216	101.186	Point 4	551.195	153.251	90.856	no cnx
2019_08_26_exp2_TH	Tlx3	ChrimsonR_kv_eyfp_AAV	3	pyramidal	2	216	101.186	Point 7	481.711	28.43	90.856	no cnx
2019_08_26_exp2_TH	Tlx3	ChrimsonR_kv_eyfp_AAV	3	pyramidal	2	216	101.186	Point 6	500.485	112.221	90.856	no cnx
2019_08_26_exp2_TH	Tlx3	ChrimsonR_kv_eyfp_AAV	3	pyramidal	2	216	101.186	Point 1	476.531	102.638	90.856	no cnx
2019_08_26_exp2_TH	Tlx3	ChrimsonR_kv_eyfp_AAV	3	pyramidal	2	216	101.186	Point 3	580.119	268.496	90.856	no cnx
2019_08_26_exp2_TH	Tlx3	ChrimsonR_kv_eyfp_AAV	3	pyramidal	2	216	101.186	Point 2	523.645	201.983	90.856	excitatory	0.334657
2019_08_26_exp2_TH	Tlx3	ChrimsonR_kv_eyfp_AAV	3	pyramidal	2	216	101.186	Point 9	450.608	101.716	90.856	no cnx
2019_08_26_exp2_TH	Tlx3	ChrimsonR_kv_eyfp_AAV	3	pyramidal	2	216	101.186	Point 8	443.71	120.955	90.856	no cnx
2019_08_26_exp2_TH	Tlx3	ChrimsonR_kv_eyfp_AAV	3	pyramidal	2	216	101.186	Point 32	476.671	217.009	80.996	no cnx
2019_08_26_exp2_TH	Tlx3	ChrimsonR_kv_eyfp_AAV	3	pyramidal	2	216	101.186	Point 48	487.338	373.519	68.416	no cnx
2019_08_26_exp2_TH	Tlx3	ChrimsonR_kv_eyfp_AAV	3	pyramidal	2	216	101.186	Point 49	445.538	190.051	68.416	no cnx
2019_08_26_exp2_TH	Tlx3	ChrimsonR_kv_eyfp_AAV	3	pyramidal	2	216	101.186	Point 42	532.315	372.111	68.416	no cnx
2019_08_26_exp2_TH	Tlx3	ChrimsonR_kv_eyfp_AAV	3	pyramidal	2	216	101.186	Point 43	551.594	310.697	68.416	no cnx
2019_08_26_exp2_TH	Tlx3	ChrimsonR_kv_eyfp_AAV	3	pyramidal	2	216	101.186	Point 40	452.211	247.33	68.416	no cnx
2019_08_26_exp2_TH	Tlx3	ChrimsonR_kv_eyfp_AAV	3	pyramidal	2	216	101.186	Point 41	420.41	252.799	68.416	no cnx
2019_08_26_exp2_TH	Tlx3	ChrimsonR_kv_eyfp_AAV	3	pyramidal	2	216	101.186	Point 46	537.15	344.215	68.416	no cnx
2019_08_26_exp2_TH	Tlx3	ChrimsonR_kv_eyfp_AAV	3	pyramidal	2	216	101.186	Point 47	498.213	433.694	68.416	no cnx
2019_08_26_exp2_TH	Tlx3	ChrimsonR_kv_eyfp_AAV	3	pyramidal	2	216	101.186	Point 44	479.96	294.923	68.416	no cnx
2019_08_26_exp2_TH	Tlx3	ChrimsonR_kv_eyfp_AAV	3	pyramidal	2	216	101.186	Point 45	469.172	415.584	68.416	no cnx
2019_08_26_exp2_TH	Tlx3	ChrimsonR_kv_eyfp_AAV	3	pyramidal	2	216	101.186	Point 28	497.049	340.259	80.996	no cnx
2019_08_26_exp2_TH	Tlx3	ChrimsonR_kv_eyfp_AAV	3	pyramidal	2	216	101.186	Point 29	448.669	375.846	80.996	no cnx
2019_08_26_exp2_TH	Tlx3	ChrimsonR_kv_eyfp_AAV	3	pyramidal	2	216	101.186	Point 20	500.973	219.905	86.686	no cnx
2019_08_26_exp2_TH	Tlx3	ChrimsonR_kv_eyfp_AAV	3	pyramidal	2	216	101.186	Point 21	529.75	439.828	80.996	no cnx
2019_08_26_exp2_TH	Tlx3	ChrimsonR_kv_eyfp_AAV	3	pyramidal	2	216	101.186	Point 22	474.465	328.046	80.996	no cnx
2019_08_26_exp2_TH	Tlx3	ChrimsonR_kv_eyfp_AAV	3	pyramidal	2	216	101.186	Point 23	484.3	396.001	80.996	no cnx
2019_08_26_exp2_TH	Tlx3	ChrimsonR_kv_eyfp_AAV	3	pyramidal	2	216	101.186	Point 24	518.774	249.987	80.996	no cnx
2019_08_26_exp2_TH	Tlx3	ChrimsonR_kv_eyfp_AAV	3	pyramidal	2	216	101.186	Point 25	516.952	362.722	80.996	no cnx
2019_08_26_exp2_TH	Tlx3	ChrimsonR_kv_eyfp_AAV	3	pyramidal	2	216	101.186	Point 26	465.008	245.184	80.996	no cnx
2019_08_26_exp2_TH	Tlx3	ChrimsonR_kv_eyfp_AAV	3	pyramidal	2	216	101.186	Point 27	418.948	179.708	80.996	no cnx
2019_08_26_exp2_TH	Tlx3	ChrimsonR_kv_eyfp_AAV	3	pyramidal	2	216	101.186	Point 39	474.026	437.042	68.416	no cnx
2019_08_26_exp2_TH	Tlx3	ChrimsonR_kv_eyfp_AAV	3	pyramidal	2	216	101.186	Point 33	486.143	283.25	80.996	no cnx
2019_08_26_exp2_TH	Tlx3	ChrimsonR_kv_eyfp_AAV	3	pyramidal	2	216	101.186	Point 38	542.668	400.287	68.416	no cnx
2019_08_26_exp2_TH	Tlx3	ChrimsonR_kv_eyfp_AAV	0	pyramidal	2	229	120.836	Point 11	475.485	-83.1445	86.686	no cnx
2019_08_26_exp2_TH	Tlx3	ChrimsonR_kv_eyfp_AAV	0	pyramidal	2	229	120.836	Point 10	526.533	-127.291	90.856	no cnx
2019_08_26_exp2_TH	Tlx3	ChrimsonR_kv_eyfp_AAV	0	pyramidal	2	229	120.836	Point 13	546.565	86.7996	86.686	no cnx
2019_08_26_exp2_TH	Tlx3	ChrimsonR_kv_eyfp_AAV	0	pyramidal	2	229	120.836	Point 12	505.871	49.4325	86.686	no cnx
2019_08_26_exp2_TH	Tlx3	ChrimsonR_kv_eyfp_AAV	0	pyramidal	2	229	120.836	Point 15	475.859	-173.586	86.686	no cnx
2019_08_26_exp2_TH	Tlx3	ChrimsonR_kv_eyfp_AAV	0	pyramidal	2	229	120.836	Point 14	618.901	17.0991	86.686	no cnx
2019_08_26_exp2_TH	Tlx3	ChrimsonR_kv_eyfp_AAV	0	pyramidal	2	229	120.836	Point 17	444.964	-140.062	86.686	no cnx
2019_08_26_exp2_TH	Tlx3	ChrimsonR_kv_eyfp_AAV	0	pyramidal	2	229	120.836	Point 16	551.596	36.3035	86.686	no cnx
2019_08_26_exp2_TH	Tlx3	ChrimsonR_kv_eyfp_AAV	0	pyramidal	2	229	120.836	Point 19	490.4	64.2643	86.686	no cnx
2019_08_26_exp2_TH	Tlx3	ChrimsonR_kv_eyfp_AAV	0	pyramidal	2	229	120.836	Point 18	517.001	77.6633	86.686	no cnx
2019_08_26_exp2_TH	Tlx3	ChrimsonR_kv_eyfp_AAV	0	pyramidal	2	229	120.836	Point 30	458.179	19.0459	80.996	no cnx
2019_08_26_exp2_TH	Tlx3	ChrimsonR_kv_eyfp_AAV	0	pyramidal	2	229	120.836	Point 37	499.47	22.861	80.996	no cnx
2019_08_26_exp2_TH	Tlx3	ChrimsonR_kv_eyfp_AAV	0	pyramidal	2	229	120.836	Point 36	495.614	233.326	80.996	no cnx
2019_08_26_exp2_TH	Tlx3	ChrimsonR_kv_eyfp_AAV	0	pyramidal	2	229	120.836	Point 34	483.415	137.993	80.996	no cnx
2019_08_26_exp2_TH	Tlx3	ChrimsonR_kv_eyfp_AAV	0	pyramidal	2	229	120.836	Point 5	528.989	-157.446	90.856	no cnx
2019_08_26_exp2_TH	Tlx3	ChrimsonR_kv_eyfp_AAV	0	pyramidal	2	229	120.836	Point 4	552.045	-55.5161	90.856	no cnx
2019_08_26_exp2_TH	Tlx3	ChrimsonR_kv_eyfp_AAV	0	pyramidal	2	229	120.836	Point 7	482.561	-180.337	90.856	no cnx
2019_08_26_exp2_TH	Tlx3	ChrimsonR_kv_eyfp_AAV	0	pyramidal	2	229	120.836	Point 6	501.335	-96.5467	90.856	no cnx
2019_08_26_exp2_TH	Tlx3	ChrimsonR_kv_eyfp_AAV	0	pyramidal	2	229	120.836	Point 1	477.381	-106.129	90.856	no cnx
2019_08_26_exp2_TH	Tlx3	ChrimsonR_kv_eyfp_AAV	0	pyramidal	2	229	120.836	Point 3	580.97	59.729	90.856	no cnx
2019_08_26_exp2_TH	Tlx3	ChrimsonR_kv_eyfp_AAV	0	pyramidal	2	229	120.836	Point 2	524.496	-6.78401	90.856	no cnx
2019_08_26_exp2_TH	Tlx3	ChrimsonR_kv_eyfp_AAV	0	pyramidal	2	229	120.836	Point 9	451.458	-107.051	90.856	no cnx
2019_08_26_exp2_TH	Tlx3	ChrimsonR_kv_eyfp_AAV	0	pyramidal	2	229	120.836	Point 8	444.56	-87.8118	90.856	no cnx
2019_08_26_exp2_TH	Tlx3	ChrimsonR_kv_eyfp_AAV	0	pyramidal	2	229	120.836	Point 32	477.521	8.24218	80.996	no cnx
2019_08_26_exp2_TH	Tlx3	ChrimsonR_kv_eyfp_AAV	0	pyramidal	2	229	120.836	Point 28	497.899	131.492	80.996	no cnx
2019_08_26_exp2_TH	Tlx3	ChrimsonR_kv_eyfp_AAV	0	pyramidal	2	229	120.836	Point 29	449.519	167.078	80.996	no cnx
2019_08_26_exp2_TH	Tlx3	ChrimsonR_kv_eyfp_AAV	0	pyramidal	2	229	120.836	Point 20	501.823	11.1375	86.686	no cnx
2019_08_26_exp2_TH	Tlx3	ChrimsonR_kv_eyfp_AAV	0	pyramidal	2	229	120.836	Point 21	530.6	231.061	80.996	no cnx
2019_08_26_exp2_TH	Tlx3	ChrimsonR_kv_eyfp_AAV	0	pyramidal	2	229	120.836	Point 22	475.315	119.279	80.996	no cnx
2019_08_26_exp2_TH	Tlx3	ChrimsonR_kv_eyfp_AAV	0	pyramidal	2	229	120.836	Point 23	485.15	187.234	80.996	no cnx
2019_08_26_exp2_TH	Tlx3	ChrimsonR_kv_eyfp_AAV	0	pyramidal	2	229	120.836	Point 24	519.624	41.2196	80.996	no cnx
2019_08_26_exp2_TH	Tlx3	ChrimsonR_kv_eyfp_AAV	0	pyramidal	2	229	120.836	Point 25	517.802	153.955	80.996	no cnx
2019_08_26_exp2_TH	Tlx3	ChrimsonR_kv_eyfp_AAV	0	pyramidal	2	229	120.836	Point 26	465.858	36.4164	80.996	no cnx
2019_08_26_exp2_TH	Tlx3	ChrimsonR_kv_eyfp_AAV	0	pyramidal	2	229	120.836	Point 33	486.993	74.483	80.996	no cnx
2019_08_26_exp1_TH	Tlx3	ChrimsonR_kv_eyfp_AAV	1	pyramidal	2	155	230.716	Point 51	453.689	365.929	203.616	no cnx
2019_08_26_exp1_TH	Tlx3	ChrimsonR_kv_eyfp_AAV	1	pyramidal	2	155	230.716	Point 50	421.379	411.549	203.616	no cnx
2019_08_26_exp1_TH	Tlx3	ChrimsonR_kv_eyfp_AAV	1	pyramidal	2	155	230.716	Point 53	474.241	402.846	203.616	no cnx
2019_08_26_exp1_TH	Tlx3	ChrimsonR_kv_eyfp_AAV	1	pyramidal	2	155	230.716	Point 52	505.949	456.62	203.616	no cnx
2019_08_26_exp1_TH	Tlx3	ChrimsonR_kv_eyfp_AAV	1	pyramidal	2	155	230.716	Point 11	567.559	110.912	192.216	no cnx
2019_08_26_exp1_TH	Tlx3	ChrimsonR_kv_eyfp_AAV	1	pyramidal	2	155	230.716	Point 10	481.18	183.766	215.806	excitatory
2019_08_26_exp1_TH	Tlx3	ChrimsonR_kv_eyfp_AAV	1	pyramidal	2	155	230.716	Point 13	487.996	301.43	192.216	no cnx
2019_08_26_exp1_TH	Tlx3	ChrimsonR_kv_eyfp_AAV	1	pyramidal	2	155	230.716	Point 12	534.629	241.02	215.806	excitatory	0.523521
2019_08_26_exp1_TH	Tlx3	ChrimsonR_kv_eyfp_AAV	1	pyramidal	2	155	230.716	Point 15	573.111	313.83	192.216	no cnx
2019_08_26_exp1_TH	Tlx3	ChrimsonR_kv_eyfp_AAV	1	pyramidal	2	155	230.716	Point 14	540.198	210.128	192.216	no cnx
2019_08_26_exp1_TH	Tlx3	ChrimsonR_kv_eyfp_AAV	1	pyramidal	2	155	230.716	Point 17	598.28	217.254	192.216	no cnx
2019_08_26_exp1_TH	Tlx3	ChrimsonR_kv_eyfp_AAV	1	pyramidal	2	155	230.716	Point 16	589.803	143.577	192.216	no cnx
2019_08_26_exp1_TH	Tlx3	ChrimsonR_kv_eyfp_AAV	1	pyramidal	2	155	230.716	Point 19	501.182	258.111	197.166	no cnx
2019_08_26_exp1_TH	Tlx3	ChrimsonR_kv_eyfp_AAV	1	pyramidal	2	155	230.716	Point 18	559.36	94.9785	192.216	no cnx
2019_08_26_exp1_TH	Tlx3	ChrimsonR_kv_eyfp_AAV	1	pyramidal	2	155	230.716	Point 31	463.976	435.862	199.466	no cnx
2019_08_26_exp1_TH	Tlx3	ChrimsonR_kv_eyfp_AAV	1	pyramidal	2	155	230.716	Point 30	481.971	466.581	199.466	no cnx
2019_08_26_exp1_TH	Tlx3	ChrimsonR_kv_eyfp_AAV	1	pyramidal	2	155	230.716	Point 37	580.949	419.152	200.616	no cnx
2019_08_26_exp1_TH	Tlx3	ChrimsonR_kv_eyfp_AAV	1	pyramidal	2	155	230.716	Point 36	447.375	482.812	200.616	no cnx
2019_08_26_exp1_TH	Tlx3	ChrimsonR_kv_eyfp_AAV	1	pyramidal	2	155	230.716	Point 35	616.695	355.349	199.466	no cnx
2019_08_26_exp1_TH	Tlx3	ChrimsonR_kv_eyfp_AAV	1	pyramidal	2	155	230.716	Point 34	540.685	276.217	219.536	excitatory	0.14188
2019_08_26_exp1_TH	Tlx3	ChrimsonR_kv_eyfp_AAV	1	pyramidal	2	155	230.716	Point 5	514.365	85.6023	204.786	no cnx
2019_08_26_exp1_TH	Tlx3	ChrimsonR_kv_eyfp_AAV	1	pyramidal	2	155	230.716	Point 4	528.738	42.2417	204.786	no cnx
2019_08_26_exp1_TH	Tlx3	ChrimsonR_kv_eyfp_AAV	1	pyramidal	2	155	230.716	Point 7	582.672	234.409	192.216	no cnx
2019_08_26_exp1_TH	Tlx3	ChrimsonR_kv_eyfp_AAV	1	pyramidal	2	155	230.716	Point 6	516.881	65.6921	192.216	no cnx
2019_08_26_exp1_TH	Tlx3	ChrimsonR_kv_eyfp_AAV	1	pyramidal	2	155	230.716	Point 1	525.653	228.419	204.786	no cnx
2019_08_26_exp1_TH	Tlx3	ChrimsonR_kv_eyfp_AAV	1	pyramidal	2	155	230.716	Point 3	533.164	113.133	204.786	no cnx
2019_08_26_exp1_TH	Tlx3	ChrimsonR_kv_eyfp_AAV	1	pyramidal	2	155	230.716	Point 2	507.163	112.74	204.786	no cnx
2019_08_26_exp1_TH	Tlx3	ChrimsonR_kv_eyfp_AAV	1	pyramidal	2	155	230.716	Point 9	513.012	239.463	192.216	no cnx
2019_08_26_exp1_TH	Tlx3	ChrimsonR_kv_eyfp_AAV	1	pyramidal	2	155	230.716	Point 8	579.86	113.141	192.216	no cnx
2019_08_26_exp1_TH	Tlx3	ChrimsonR_kv_eyfp_AAV	1	pyramidal	2	155	230.716	Point 32	499.863	366.893	199.466	no cnx
2019_08_26_exp1_TH	Tlx3	ChrimsonR_kv_eyfp_AAV	1	pyramidal	2	155	230.716	Point 48	540.754	416.914	203.616	no cnx
2019_08_26_exp1_TH	Tlx3	ChrimsonR_kv_eyfp_AAV	1	pyramidal	2	155	230.716	Point 49	483.865	381.99	203.616	no cnx
2019_08_26_exp1_TH	Tlx3	ChrimsonR_kv_eyfp_AAV	1	pyramidal	2	155	230.716	Point 42	451.457	436.746	200.616	no cnx
2019_08_26_exp1_TH	Tlx3	ChrimsonR_kv_eyfp_AAV	1	pyramidal	2	155	230.716	Point 43	564.149	331.188	200.616	no cnx
2019_08_26_exp1_TH	Tlx3	ChrimsonR_kv_eyfp_AAV	1	pyramidal	2	155	230.716	Point 40	438.675	360.187	200.616	no cnx
2019_08_26_exp1_TH	Tlx3	ChrimsonR_kv_eyfp_AAV	1	pyramidal	2	155	230.716	Point 41	461.249	324.217	200.616	no cnx
2019_08_26_exp1_TH	Tlx3	ChrimsonR_kv_eyfp_AAV	1	pyramidal	2	155	230.716	Point 46	496.084	387.095	203.616	no cnx
2019_08_26_exp1_TH	Tlx3	ChrimsonR_kv_eyfp_AAV	1	pyramidal	2	155	230.716	Point 47	459.881	530.367	203.616	no cnx
2019_08_26_exp1_TH	Tlx3	ChrimsonR_kv_eyfp_AAV	1	pyramidal	2	155	230.716	Point 44	452.046	345.972	203.616	no cnx
2019_08_26_exp1_TH	Tlx3	ChrimsonR_kv_eyfp_AAV	1	pyramidal	2	155	230.716	Point 45	441.447	452.593	203.616	no cnx
2019_08_26_exp1_TH	Tlx3	ChrimsonR_kv_eyfp_AAV	1	pyramidal	2	155	230.716	Point 28	601.89	424.754	199.466	no cnx
2019_08_26_exp1_TH	Tlx3	ChrimsonR_kv_eyfp_AAV	1	pyramidal	2	155	230.716	Point 29	638.536	554.206	199.466	no cnx
2019_08_26_exp1_TH	Tlx3	ChrimsonR_kv_eyfp_AAV	1	pyramidal	2	155	230.716	Point 20	531.53	304.869	207.556	excitatory	1.24679
2019_08_26_exp1_TH	Tlx3	ChrimsonR_kv_eyfp_AAV	1	pyramidal	2	155	230.716	Point 21	539.92	86.3087	197.166	no cnx
2019_08_26_exp1_TH	Tlx3	ChrimsonR_kv_eyfp_AAV	1	pyramidal	2	155	230.716	Point 22	513.103	192.87	207.556	excitatory	0.0592239
2019_08_26_exp1_TH	Tlx3	ChrimsonR_kv_eyfp_AAV	1	pyramidal	2	155	230.716	Point 23	563.433	141.553	197.166	no cnx
2019_08_26_exp1_TH	Tlx3	ChrimsonR_kv_eyfp_AAV	1	pyramidal	2	155	230.716	Point 24	584.543	71.6965	207.556	excitatory	0.0589893
2019_08_26_exp1_TH	Tlx3	ChrimsonR_kv_eyfp_AAV	1	pyramidal	2	155	230.716	Point 25	444.832	301.728	199.466	no cnx
2019_08_26_exp1_TH	Tlx3	ChrimsonR_kv_eyfp_AAV	1	pyramidal	2	155	230.716	Point 26	512.361	293.297	199.466	no cnx
2019_08_26_exp1_TH	Tlx3	ChrimsonR_kv_eyfp_AAV	1	pyramidal	2	155	230.716	Point 27	508.437	474.216	199.466	no cnx
2019_08_26_exp1_TH	Tlx3	ChrimsonR_kv_eyfp_AAV	1	pyramidal	2	155	230.716	Point 39	451.575	450.714	200.616	no cnx
2019_08_26_exp1_TH	Tlx3	ChrimsonR_kv_eyfp_AAV	1	pyramidal	2	155	230.716	Point 33	598.194	325.556	199.466	no cnx
2019_08_26_exp1_TH	Tlx3	ChrimsonR_kv_eyfp_AAV	1	pyramidal	2	155	230.716	Point 38	446.92	318.559	200.616	no cnx
2019_08_23_exp2_TH	Tlx3	ChrimsonR_kv_eyfp_AAV	2	pyramidal	2	144	-16.544	Point 59	629.409	-67.2587	-10.764	no cnx
2019_08_23_exp2_TH	Tlx3	ChrimsonR_kv_eyfp_AAV	2	pyramidal	2	144	-16.544	Point 58	557.25	-64.2667	-10.764	no cnx
2019_08_23_exp2_TH	Tlx3	ChrimsonR_kv_eyfp_AAV	2	pyramidal	2	144	-16.544	Point 55	477.799	-218.493	-10.764	no cnx
2019_08_23_exp2_TH	Tlx3	ChrimsonR_kv_eyfp_AAV	2	pyramidal	2	144	-16.544	Point 54	525.012	-34.1013	-10.764	no cnx
2019_08_23_exp2_TH	Tlx3	ChrimsonR_kv_eyfp_AAV	2	pyramidal	2	144	-16.544	Point 57	691.359	-149.801	-10.764	no cnx
2019_08_23_exp2_TH	Tlx3	ChrimsonR_kv_eyfp_AAV	2	pyramidal	2	144	-16.544	Point 56	586.529	-102.57	-10.764	no cnx
2019_08_23_exp2_TH	Tlx3	ChrimsonR_kv_eyfp_AAV	2	pyramidal	2	144	-16.544	Point 51	494.619	-69.5291	-10.764	no cnx
2019_08_23_exp2_TH	Tlx3	ChrimsonR_kv_eyfp_AAV	2	pyramidal	2	144	-16.544	Point 50	524.684	-196.018	-10.764	no cnx
2019_08_23_exp2_TH	Tlx3	ChrimsonR_kv_eyfp_AAV	2	pyramidal	2	144	-16.544	Point 53	637.432	-160.937	-10.764	no cnx
2019_08_23_exp2_TH	Tlx3	ChrimsonR_kv_eyfp_AAV	2	pyramidal	2	144	-16.544	Point 52	644.677	-111.307	-10.764	no cnx
2019_08_23_exp2_TH	Tlx3	ChrimsonR_kv_eyfp_AAV	2	pyramidal	2	144	-16.544	Point 11	570.408	67.9469	15.886	no cnx
2019_08_23_exp2_TH	Tlx3	ChrimsonR_kv_eyfp_AAV	2	pyramidal	2	144	-16.544	Point 10	616.91	-54.7834	22.936	no cnx
2019_08_23_exp2_TH	Tlx3	ChrimsonR_kv_eyfp_AAV	2	pyramidal	2	144	-16.544	Point 13	507.415	144.865	15.886	no cnx
2019_08_23_exp2_TH	Tlx3	ChrimsonR_kv_eyfp_AAV	2	pyramidal	2	144	-16.544	Point 12	504.572	27.2914	15.886	no cnx
2019_08_23_exp2_TH	Tlx3	ChrimsonR_kv_eyfp_AAV	2	pyramidal	2	144	-16.544	Point 15	695.149	-39.4219	15.886	no cnx
2019_08_23_exp2_TH	Tlx3	ChrimsonR_kv_eyfp_AAV	2	pyramidal	2	144	-16.544	Point 14	610.953	102.478	15.886	no cnx
2019_08_23_exp2_TH	Tlx3	ChrimsonR_kv_eyfp_AAV	2	pyramidal	2	144	-16.544	Point 17	630.743	-1.30547	15.886	no cnx
2019_08_23_exp2_TH	Tlx3	ChrimsonR_kv_eyfp_AAV	2	pyramidal	2	144	-16.544	Point 16	568.313	86.377	15.886	no cnx
2019_08_23_exp2_TH	Tlx3	ChrimsonR_kv_eyfp_AAV	2	pyramidal	2	144	-16.544	Point 19	597.526	69.7505	15.886	no cnx
2019_08_23_exp2_TH	Tlx3	ChrimsonR_kv_eyfp_AAV	2	pyramidal	2	144	-16.544	Point 18	543.513	47.3949	15.886	no cnx
2019_08_23_exp2_TH	Tlx3	ChrimsonR_kv_eyfp_AAV	2	pyramidal	2	144	-16.544	Point 31	551.887	60.6754	7.186	no cnx
2019_08_23_exp2_TH	Tlx3	ChrimsonR_kv_eyfp_AAV	2	pyramidal	2	144	-16.544	Point 30	610.332	78.9707	7.186	no cnx
2019_08_23_exp2_TH	Tlx3	ChrimsonR_kv_eyfp_AAV	2	pyramidal	2	144	-16.544	Point 37	676.153	5.73368	7.916	no cnx
2019_08_23_exp2_TH	Tlx3	ChrimsonR_kv_eyfp_AAV	2	pyramidal	2	144	-16.544	Point 36	667.217	37.8273	7.916	no cnx
2019_08_23_exp2_TH	Tlx3	ChrimsonR_kv_eyfp_AAV	2	pyramidal	2	144	-16.544	Point 35	479.773	37.9783	7.916	no cnx
2019_08_23_exp2_TH	Tlx3	ChrimsonR_kv_eyfp_AAV	2	pyramidal	2	144	-16.544	Point 34	553.328	-72.2704	7.916	no cnx
2019_08_23_exp2_TH	Tlx3	ChrimsonR_kv_eyfp_AAV	2	pyramidal	2	144	-16.544	Point 5	535.405	-6.63831	22.936	no cnx
2019_08_23_exp2_TH	Tlx3	ChrimsonR_kv_eyfp_AAV	2	pyramidal	2	144	-16.544	Point 4	523.985	104.532	22.936	no cnx
2019_08_23_exp2_TH	Tlx3	ChrimsonR_kv_eyfp_AAV	2	pyramidal	2	144	-16.544	Point 7	705.808	-5.80294	22.936	no cnx
2019_08_23_exp2_TH	Tlx3	ChrimsonR_kv_eyfp_AAV	2	pyramidal	2	144	-16.544	Point 6	583.484	-28.6454	22.936	no cnx
2019_08_23_exp2_TH	Tlx3	ChrimsonR_kv_eyfp_AAV	2	pyramidal	2	144	-16.544	Point 1	527.527	-3.14594	22.936	no cnx
2019_08_23_exp2_TH	Tlx3	ChrimsonR_kv_eyfp_AAV	2	pyramidal	2	144	-16.544	Point 3	701.008	118.33	22.936	no cnx
2019_08_23_exp2_TH	Tlx3	ChrimsonR_kv_eyfp_AAV	2	pyramidal	2	144	-16.544	Point 2	635.878	33.0781	22.936	no cnx
2019_08_23_exp2_TH	Tlx3	ChrimsonR_kv_eyfp_AAV	2	pyramidal	2	144	-16.544	Point 9	533.967	-26.5226	22.936	no cnx
2019_08_23_exp2_TH	Tlx3	ChrimsonR_kv_eyfp_AAV	2	pyramidal	2	144	-16.544	Point 8	556.417	46.8746	22.936	no cnx
2019_08_23_exp2_TH	Tlx3	ChrimsonR_kv_eyfp_AAV	2	pyramidal	2	144	-16.544	Point 32	524.404	-75.9695	7.186	no cnx
2019_08_23_exp2_TH	Tlx3	ChrimsonR_kv_eyfp_AAV	2	pyramidal	2	144	-16.544	Point 48	499.297	-111.077	0.966	no cnx
2019_08_23_exp2_TH	Tlx3	ChrimsonR_kv_eyfp_AAV	2	pyramidal	2	144	-16.544	Point 49	479.621	-109.926	0.966	no cnx
2019_08_23_exp2_TH	Tlx3	ChrimsonR_kv_eyfp_AAV	2	pyramidal	2	144	-16.544	Point 42	543.58	-35.0529	0.966	no cnx
2019_08_23_exp2_TH	Tlx3	ChrimsonR_kv_eyfp_AAV	2	pyramidal	2	144	-16.544	Point 43	501.766	61.7575	0.966	no cnx
2019_08_23_exp2_TH	Tlx3	ChrimsonR_kv_eyfp_AAV	2	pyramidal	2	144	-16.544	Point 40	604.336	1.19969	0.966	no cnx
2019_08_23_exp2_TH	Tlx3	ChrimsonR_kv_eyfp_AAV	2	pyramidal	2	144	-16.544	Point 41	547.907	32.5029	0.966	no cnx
2019_08_23_exp2_TH	Tlx3	ChrimsonR_kv_eyfp_AAV	2	pyramidal	2	144	-16.544	Point 46	572.799	-42.9932	0.966	no cnx
2019_08_23_exp2_TH	Tlx3	ChrimsonR_kv_eyfp_AAV	2	pyramidal	2	144	-16.544	Point 47	676.314	-58.6357	0.966	no cnx
2019_08_23_exp2_TH	Tlx3	ChrimsonR_kv_eyfp_AAV	2	pyramidal	2	144	-16.544	Point 44	518.597	-42.0616	0.966	no cnx
2019_08_23_exp2_TH	Tlx3	ChrimsonR_kv_eyfp_AAV	2	pyramidal	2	144	-16.544	Point 45	511.935	-144.679	0.966	no cnx
2019_08_23_exp2_TH	Tlx3	ChrimsonR_kv_eyfp_AAV	2	pyramidal	2	144	-16.544	Point 28	613.468	24.7251	7.186	no cnx
2019_08_23_exp2_TH	Tlx3	ChrimsonR_kv_eyfp_AAV	2	pyramidal	2	144	-16.544	Point 29	504.9	-77.5872	7.186	no cnx
2019_08_23_exp2_TH	Tlx3	ChrimsonR_kv_eyfp_AAV	2	pyramidal	2	144	-16.544	Point 60	673.79	-79.8793	-10.764	no cnx
2019_08_23_exp2_TH	Tlx3	ChrimsonR_kv_eyfp_AAV	2	pyramidal	2	144	-16.544	Point 61	536.832	-171.85	-10.764	no cnx
2019_08_23_exp2_TH	Tlx3	ChrimsonR_kv_eyfp_AAV	2	pyramidal	2	144	-16.544	Point 62	563.465	-99.3037	-10.764	no cnx
2019_08_23_exp2_TH	Tlx3	ChrimsonR_kv_eyfp_AAV	2	pyramidal	2	144	-16.544	Point 63	586.117	-37.2179	-10.764	no cnx
2019_08_23_exp2_TH	Tlx3	ChrimsonR_kv_eyfp_AAV	2	pyramidal	2	144	-16.544	Point 20	508.237	55.2067	15.886	no cnx
2019_08_23_exp2_TH	Tlx3	ChrimsonR_kv_eyfp_AAV	2	pyramidal	2	144	-16.544	Point 21	537.134	97.8615	15.886	no cnx
2019_08_23_exp2_TH	Tlx3	ChrimsonR_kv_eyfp_AAV	2	pyramidal	2	144	-16.544	Point 22	503.127	18.1644	7.186	excitatory	1.25374
2019_08_23_exp2_TH	Tlx3	ChrimsonR_kv_eyfp_AAV	2	pyramidal	2	144	-16.544	Point 23	606.706	38.5447	7.186	no cnx
2019_08_23_exp2_TH	Tlx3	ChrimsonR_kv_eyfp_AAV	2	pyramidal	2	144	-16.544	Point 24	558.156	-28.1564	7.186	no cnx
2019_08_23_exp2_TH	Tlx3	ChrimsonR_kv_eyfp_AAV	2	pyramidal	2	144	-16.544	Point 25	682.376	-50.9604	7.186	no cnx
2019_08_23_exp2_TH	Tlx3	ChrimsonR_kv_eyfp_AAV	2	pyramidal	2	144	-16.544	Point 26	572.474	-101.946	7.186	no cnx
2019_08_23_exp2_TH	Tlx3	ChrimsonR_kv_eyfp_AAV	2	pyramidal	2	144	-16.544	Point 27	541.059	4.07135	7.186	no cnx
2019_08_23_exp2_TH	Tlx3	ChrimsonR_kv_eyfp_AAV	2	pyramidal	2	144	-16.544	Point 39	522.392	-4.41533	0.966	no cnx
2019_08_23_exp2_TH	Tlx3	ChrimsonR_kv_eyfp_AAV	2	pyramidal	2	144	-16.544	Point 33	630.659	-19.0429	7.916	no cnx
2019_08_23_exp2_TH	Tlx3	ChrimsonR_kv_eyfp_AAV	2	pyramidal	2	144	-16.544	Point 38	512.201	88.8243	0.966	no cnx
2019_08_23_exp1_TH	Tlx3	ChrimsonR_kv_eyfp_AAV	3	pyramidal	2	231	-88.4342	Point 51	683.038	-338.348	-119.634	no cnx
2019_08_23_exp1_TH	Tlx3	ChrimsonR_kv_eyfp_AAV	3	pyramidal	2	231	-88.4342	Point 50	599.357	-412.538	-119.634	no cnx
2019_08_23_exp1_TH	Tlx3	ChrimsonR_kv_eyfp_AAV	3	pyramidal	2	231	-88.4342	Point 52	549.098	-342.515	-119.634	no cnx
2019_08_23_exp1_TH	Tlx3	ChrimsonR_kv_eyfp_AAV	3	pyramidal	2	231	-88.4342	Point 11	609.108	-297.308	-89.514	no cnx
2019_08_23_exp1_TH	Tlx3	ChrimsonR_kv_eyfp_AAV	3	pyramidal	2	231	-88.4342	Point 10	572.111	-283.762	-89.514	no cnx
2019_08_23_exp1_TH	Tlx3	ChrimsonR_kv_eyfp_AAV	3	pyramidal	2	231	-88.4342	Point 13	665.677	-473.893	-89.514	no cnx
2019_08_23_exp1_TH	Tlx3	ChrimsonR_kv_eyfp_AAV	3	pyramidal	2	231	-88.4342	Point 12	553.515	-299.57	-89.514	no cnx
2019_08_23_exp1_TH	Tlx3	ChrimsonR_kv_eyfp_AAV	3	pyramidal	2	231	-88.4342	Point 15	735.952	-367.987	-97.764	no cnx
2019_08_23_exp1_TH	Tlx3	ChrimsonR_kv_eyfp_AAV	3	pyramidal	2	231	-88.4342	Point 14	581.596	-508.388	-97.764	no cnx
2019_08_23_exp1_TH	Tlx3	ChrimsonR_kv_eyfp_AAV	3	pyramidal	2	231	-88.4342	Point 17	576.011	-456.259	-97.764	no cnx
2019_08_23_exp1_TH	Tlx3	ChrimsonR_kv_eyfp_AAV	3	pyramidal	2	231	-88.4342	Point 16	758.554	-433.29	-97.764	no cnx
2019_08_23_exp1_TH	Tlx3	ChrimsonR_kv_eyfp_AAV	3	pyramidal	2	231	-88.4342	Point 19	513.694	-313.87	-97.764	no cnx
2019_08_23_exp1_TH	Tlx3	ChrimsonR_kv_eyfp_AAV	3	pyramidal	2	231	-88.4342	Point 18	540.394	-374.414	-97.764	no cnx
2019_08_23_exp1_TH	Tlx3	ChrimsonR_kv_eyfp_AAV	3	pyramidal	2	231	-88.4342	Point 31	503.681	-381.192	-102.254	no cnx
2019_08_23_exp1_TH	Tlx3	ChrimsonR_kv_eyfp_AAV	3	pyramidal	2	231	-88.4342	Point 30	586.765	-383.284	-102.254	no cnx
2019_08_23_exp1_TH	Tlx3	ChrimsonR_kv_eyfp_AAV	3	pyramidal	2	231	-88.4342	Point 37	515.386	-427.201	-109.824	no cnx
2019_08_23_exp1_TH	Tlx3	ChrimsonR_kv_eyfp_AAV	3	pyramidal	2	231	-88.4342	Point 36	723.654	-339.555	-109.824	no cnx
2019_08_23_exp1_TH	Tlx3	ChrimsonR_kv_eyfp_AAV	3	pyramidal	2	231	-88.4342	Point 35	667.963	-325.078	-109.824	no cnx
2019_08_23_exp1_TH	Tlx3	ChrimsonR_kv_eyfp_AAV	3	pyramidal	2	231	-88.4342	Point 34	536.82	-435.985	-109.824	no cnx
2019_08_23_exp1_TH	Tlx3	ChrimsonR_kv_eyfp_AAV	3	pyramidal	2	231	-88.4342	Point 5	697.507	-483.217	-89.044	no cnx
2019_08_23_exp1_TH	Tlx3	ChrimsonR_kv_eyfp_AAV	3	pyramidal	2	231	-88.4342	Point 4	618.809	-458.578	-89.044	no cnx
2019_08_23_exp1_TH	Tlx3	ChrimsonR_kv_eyfp_AAV	3	pyramidal	2	231	-88.4342	Point 7	547.444	-369.169	-89.044	no cnx
2019_08_23_exp1_TH	Tlx3	ChrimsonR_kv_eyfp_AAV	3	pyramidal	2	231	-88.4342	Point 6	582.564	-340.07	-89.044	no cnx
2019_08_23_exp1_TH	Tlx3	ChrimsonR_kv_eyfp_AAV	3	pyramidal	2	231	-88.4342	Point 1	572.425	-471.826	-89.044	no cnx
2019_08_23_exp1_TH	Tlx3	ChrimsonR_kv_eyfp_AAV	3	pyramidal	2	231	-88.4342	Point 3	704.057	-407.978	-89.044	no cnx
2019_08_23_exp1_TH	Tlx3	ChrimsonR_kv_eyfp_AAV	3	pyramidal	2	231	-88.4342	Point 2	570.549	-354.355	-89.044	no cnx
2019_08_23_exp1_TH	Tlx3	ChrimsonR_kv_eyfp_AAV	3	pyramidal	2	231	-88.4342	Point 9	614.838	-375.404	-89.044	no cnx
2019_08_23_exp1_TH	Tlx3	ChrimsonR_kv_eyfp_AAV	3	pyramidal	2	231	-88.4342	Point 8	632.361	-468.843	-89.044	no cnx
2019_08_23_exp1_TH	Tlx3	ChrimsonR_kv_eyfp_AAV	3	pyramidal	2	231	-88.4342	Point 32	736.954	-400.776	-102.254	no cnx
2019_08_23_exp1_TH	Tlx3	ChrimsonR_kv_eyfp_AAV	3	pyramidal	2	231	-88.4342	Point 48	691.7	-436.257	-119.634	no cnx
2019_08_23_exp1_TH	Tlx3	ChrimsonR_kv_eyfp_AAV	3	pyramidal	2	231	-88.4342	Point 49	589.866	-550.83	-119.634	no cnx
2019_08_23_exp1_TH	Tlx3	ChrimsonR_kv_eyfp_AAV	3	pyramidal	2	231	-88.4342	Point 42	596.258	-431.135	-109.824	no cnx
2019_08_23_exp1_TH	Tlx3	ChrimsonR_kv_eyfp_AAV	3	pyramidal	2	231	-88.4342	Point 43	526.818	-385.989	-109.824	no cnx
2019_08_23_exp1_TH	Tlx3	ChrimsonR_kv_eyfp_AAV	3	pyramidal	2	231	-88.4342	Point 40	706.104	-373.766	-109.824	no cnx
2019_08_23_exp1_TH	Tlx3	ChrimsonR_kv_eyfp_AAV	3	pyramidal	2	231	-88.4342	Point 41	527.377	-411.253	-109.824	no cnx
2019_08_23_exp1_TH	Tlx3	ChrimsonR_kv_eyfp_AAV	3	pyramidal	2	231	-88.4342	Point 46	599.216	-481.805	-119.634	no cnx
2019_08_23_exp1_TH	Tlx3	ChrimsonR_kv_eyfp_AAV	3	pyramidal	2	231	-88.4342	Point 47	636.31	-523.646	-119.634	no cnx
2019_08_23_exp1_TH	Tlx3	ChrimsonR_kv_eyfp_AAV	3	pyramidal	2	231	-88.4342	Point 44	690.769	-380.641	-109.824	no cnx
2019_08_23_exp1_TH	Tlx3	ChrimsonR_kv_eyfp_AAV	3	pyramidal	2	231	-88.4342	Point 45	551.752	-498.944	-119.634	no cnx
2019_08_23_exp1_TH	Tlx3	ChrimsonR_kv_eyfp_AAV	3	pyramidal	2	231	-88.4342	Point 28	579.194	-377.32	-102.254	no cnx
2019_08_23_exp1_TH	Tlx3	ChrimsonR_kv_eyfp_AAV	3	pyramidal	2	231	-88.4342	Point 29	570.782	-456.622	-102.254	no cnx
2019_08_23_exp1_TH	Tlx3	ChrimsonR_kv_eyfp_AAV	3	pyramidal	2	231	-88.4342	Point 20	591.523	-288.054	-97.764	no cnx
2019_08_23_exp1_TH	Tlx3	ChrimsonR_kv_eyfp_AAV	3	pyramidal	2	231	-88.4342	Point 21	622.005	-541.879	-97.764	no cnx
2019_08_23_exp1_TH	Tlx3	ChrimsonR_kv_eyfp_AAV	3	pyramidal	2	231	-88.4342	Point 22	662.009	-292.376	-97.764	no cnx
2019_08_23_exp1_TH	Tlx3	ChrimsonR_kv_eyfp_AAV	3	pyramidal	2	231	-88.4342	Point 23	578.222	-300.727	-97.764	no cnx
2019_08_23_exp1_TH	Tlx3	ChrimsonR_kv_eyfp_AAV	3	pyramidal	2	231	-88.4342	Point 24	580.533	-347.461	-97.764	no cnx
2019_08_23_exp1_TH	Tlx3	ChrimsonR_kv_eyfp_AAV	3	pyramidal	2	231	-88.4342	Point 25	622.9	-289.465	-97.764	no cnx
2019_08_23_exp1_TH	Tlx3	ChrimsonR_kv_eyfp_AAV	3	pyramidal	2	231	-88.4342	Point 26	721.366	-416.382	-97.764	no cnx
2019_08_23_exp1_TH	Tlx3	ChrimsonR_kv_eyfp_AAV	3	pyramidal	2	231	-88.4342	Point 27	586.007	-476.094	-97.764	no cnx
2019_08_23_exp1_TH	Tlx3	ChrimsonR_kv_eyfp_AAV	3	pyramidal	2	231	-88.4342	Point 39	550.155	-430.858	-109.824	no cnx
2019_08_23_exp1_TH	Tlx3	ChrimsonR_kv_eyfp_AAV	3	pyramidal	2	231	-88.4342	Point 33	569.494	-537.957	-109.824	no cnx
2019_08_23_exp1_TH	Tlx3	ChrimsonR_kv_eyfp_AAV	3	pyramidal	2	231	-88.4342	Point 38	530.824	-290.062	-109.824	no cnx
2019_08_22_exp3_TH	Tlx3	ChrimsonR_kv_eyfp_AAV	2	pyramidal	2	188	-15.8842	Point 11	687.276	70.1731	-70.324	no cnx
2019_08_22_exp3_TH	Tlx3	ChrimsonR_kv_eyfp_AAV	2	pyramidal	2	188	-15.8842	Point 10	686.913	23.7867	-70.324	no cnx
2019_08_22_exp3_TH	Tlx3	ChrimsonR_kv_eyfp_AAV	2	pyramidal	2	188	-15.8842	Point 13	582.534	143.71	-70.324	no cnx
2019_08_22_exp3_TH	Tlx3	ChrimsonR_kv_eyfp_AAV	2	pyramidal	2	188	-15.8842	Point 12	615.173	73.3914	-70.324	excitatory	0.235981
2019_08_22_exp3_TH	Tlx3	ChrimsonR_kv_eyfp_AAV	2	pyramidal	2	188	-15.8842	Point 15	545.331	111.255	-70.324	no cnx
2019_08_22_exp3_TH	Tlx3	ChrimsonR_kv_eyfp_AAV	2	pyramidal	2	188	-15.8842	Point 14	510.855	125.758	-70.324	no cnx
2019_08_22_exp3_TH	Tlx3	ChrimsonR_kv_eyfp_AAV	2	pyramidal	2	188	-15.8842	Point 17	584.039	90.8923	-70.324	no cnx
2019_08_22_exp3_TH	Tlx3	ChrimsonR_kv_eyfp_AAV	2	pyramidal	2	188	-15.8842	Point 16	577.77	-3.53365	-70.324	no cnx
2019_08_22_exp3_TH	Tlx3	ChrimsonR_kv_eyfp_AAV	2	pyramidal	2	188	-15.8842	Point 19	541.003	47.4793	-78.574	no cnx
2019_08_22_exp3_TH	Tlx3	ChrimsonR_kv_eyfp_AAV	2	pyramidal	2	188	-15.8842	Point 18	576.977	55.3995	-70.324	no cnx
2019_08_22_exp3_TH	Tlx3	ChrimsonR_kv_eyfp_AAV	2	pyramidal	2	188	-15.8842	Point 30	546.404	135.243	-67.584	excitatory	0.100224
2019_08_22_exp3_TH	Tlx3	ChrimsonR_kv_eyfp_AAV	2	pyramidal	2	188	-15.8842	Point 37	536.251	153.604	-83.774	no cnx
2019_08_22_exp3_TH	Tlx3	ChrimsonR_kv_eyfp_AAV	2	pyramidal	2	188	-15.8842	Point 36	501.858	149.079	-83.774	no cnx
2019_08_22_exp3_TH	Tlx3	ChrimsonR_kv_eyfp_AAV	2	pyramidal	2	188	-15.8842	Point 35	687.128	148.347	-83.774	no cnx
2019_08_22_exp3_TH	Tlx3	ChrimsonR_kv_eyfp_AAV	2	pyramidal	2	188	-15.8842	Point 34	610.193	117.561	-83.774	no cnx
2019_08_22_exp3_TH	Tlx3	ChrimsonR_kv_eyfp_AAV	2	pyramidal	2	188	-15.8842	Point 5	549.803	128.228	-62.424	excitatory	0.592872
2019_08_22_exp3_TH	Tlx3	ChrimsonR_kv_eyfp_AAV	2	pyramidal	2	188	-15.8842	Point 4	612.515	62.1282	-62.424	no cnx
2019_08_22_exp3_TH	Tlx3	ChrimsonR_kv_eyfp_AAV	2	pyramidal	2	188	-15.8842	Point 7	558.69	135.008	-62.424	no cnx
2019_08_22_exp3_TH	Tlx3	ChrimsonR_kv_eyfp_AAV	2	pyramidal	2	188	-15.8842	Point 6	706.342	27.548	-62.424	excitatory	0.241068
2019_08_22_exp3_TH	Tlx3	ChrimsonR_kv_eyfp_AAV	2	pyramidal	2	188	-15.8842	Point 1	543.969	54.8222	-62.424	no cnx
2019_08_22_exp3_TH	Tlx3	ChrimsonR_kv_eyfp_AAV	2	pyramidal	2	188	-15.8842	Point 3	526.76	75.5032	-62.424	no cnx
2019_08_22_exp3_TH	Tlx3	ChrimsonR_kv_eyfp_AAV	2	pyramidal	2	188	-15.8842	Point 2	688.985	41.8777	-62.424	no cnx
2019_08_22_exp3_TH	Tlx3	ChrimsonR_kv_eyfp_AAV	2	pyramidal	2	188	-15.8842	Point 9	636.001	58.4048	-70.324	no cnx
2019_08_22_exp3_TH	Tlx3	ChrimsonR_kv_eyfp_AAV	2	pyramidal	2	188	-15.8842	Point 8	521.312	95.4385	-70.324	no cnx
2019_08_22_exp3_TH	Tlx3	ChrimsonR_kv_eyfp_AAV	2	pyramidal	2	188	-15.8842	Point 32	528.131	89.1445	-83.774	no cnx
2019_08_22_exp3_TH	Tlx3	ChrimsonR_kv_eyfp_AAV	2	pyramidal	2	188	-15.8842	Point 42	640.617	59.9417	-92.834	no cnx
2019_08_22_exp3_TH	Tlx3	ChrimsonR_kv_eyfp_AAV	2	pyramidal	2	188	-15.8842	Point 43	687.721	61.6158	-92.834	no cnx
2019_08_22_exp3_TH	Tlx3	ChrimsonR_kv_eyfp_AAV	2	pyramidal	2	188	-15.8842	Point 40	706.841	97.5445	-92.834	no cnx
2019_08_22_exp3_TH	Tlx3	ChrimsonR_kv_eyfp_AAV	2	pyramidal	2	188	-15.8842	Point 41	589.271	89.968	-92.834	excitatory	0.108904
2019_08_22_exp3_TH	Tlx3	ChrimsonR_kv_eyfp_AAV	2	pyramidal	2	188	-15.8842	Point 28	588.258	143.857	-78.574	no cnx
2019_08_22_exp3_TH	Tlx3	ChrimsonR_kv_eyfp_AAV	2	pyramidal	2	188	-15.8842	Point 29	617.349	106.206	-78.574	no cnx
2019_08_22_exp3_TH	Tlx3	ChrimsonR_kv_eyfp_AAV	2	pyramidal	2	188	-15.8842	Point 20	611.939	132.237	-78.574	no cnx
2019_08_22_exp3_TH	Tlx3	ChrimsonR_kv_eyfp_AAV	2	pyramidal	2	188	-15.8842	Point 21	567.802	168.896	-78.574	no cnx
2019_08_22_exp3_TH	Tlx3	ChrimsonR_kv_eyfp_AAV	2	pyramidal	2	188	-15.8842	Point 22	551.132	31.114	-78.574	no cnx
2019_08_22_exp3_TH	Tlx3	ChrimsonR_kv_eyfp_AAV	2	pyramidal	2	188	-15.8842	Point 23	573.737	59.213	-78.574	no cnx
2019_08_22_exp3_TH	Tlx3	ChrimsonR_kv_eyfp_AAV	2	pyramidal	2	188	-15.8842	Point 24	648.741	88.2194	-78.574	no cnx
2019_08_22_exp3_TH	Tlx3	ChrimsonR_kv_eyfp_AAV	2	pyramidal	2	188	-15.8842	Point 25	652.023	126.934	-78.574	no cnx
2019_08_22_exp3_TH	Tlx3	ChrimsonR_kv_eyfp_AAV	2	pyramidal	2	188	-15.8842	Point 26	580.334	96.3771	-78.574	no cnx
2019_08_22_exp3_TH	Tlx3	ChrimsonR_kv_eyfp_AAV	2	pyramidal	2	188	-15.8842	Point 39	602.521	154.991	-92.834	no cnx
2019_08_22_exp3_TH	Tlx3	ChrimsonR_kv_eyfp_AAV	2	pyramidal	2	188	-15.8842	Point 33	589.982	72.8911	-83.774	no cnx
2019_08_22_exp3_TH	Tlx3	ChrimsonR_kv_eyfp_AAV	2	pyramidal	2	188	-15.8842	Point 38	500.382	86.4982	-92.834	no cnx
2019_08_22_exp3_TH	Tlx3	ChrimsonR_kv_eyfp_AAV	1	pyramidal	2	245	-23.8437	Point 11	685.984	146.566	-70.324	no cnx
2019_08_22_exp3_TH	Tlx3	ChrimsonR_kv_eyfp_AAV	1	pyramidal	2	245	-23.8437	Point 10	685.622	100.18	-70.324	no cnx
2019_08_22_exp3_TH	Tlx3	ChrimsonR_kv_eyfp_AAV	1	pyramidal	2	245	-23.8437	Point 13	581.243	220.103	-70.324	no cnx
2019_08_22_exp3_TH	Tlx3	ChrimsonR_kv_eyfp_AAV	1	pyramidal	2	245	-23.8437	Point 12	613.881	149.784	-70.324	no cnx
2019_08_22_exp3_TH	Tlx3	ChrimsonR_kv_eyfp_AAV	1	pyramidal	2	245	-23.8437	Point 15	544.04	187.648	-70.324	no cnx
2019_08_22_exp3_TH	Tlx3	ChrimsonR_kv_eyfp_AAV	1	pyramidal	2	245	-23.8437	Point 14	509.564	202.151	-70.324	no cnx
2019_08_22_exp3_TH	Tlx3	ChrimsonR_kv_eyfp_AAV	1	pyramidal	2	245	-23.8437	Point 17	582.747	167.285	-70.324	no cnx
2019_08_22_exp3_TH	Tlx3	ChrimsonR_kv_eyfp_AAV	1	pyramidal	2	245	-23.8437	Point 16	576.479	72.8593	-70.324	no cnx
2019_08_22_exp3_TH	Tlx3	ChrimsonR_kv_eyfp_AAV	1	pyramidal	2	245	-23.8437	Point 19	539.712	123.872	-78.574	excitatory	0.371522
2019_08_22_exp3_TH	Tlx3	ChrimsonR_kv_eyfp_AAV	1	pyramidal	2	245	-23.8437	Point 18	575.685	131.792	-70.324	no cnx
2019_08_22_exp3_TH	Tlx3	ChrimsonR_kv_eyfp_AAV	1	pyramidal	2	245	-23.8437	Point 30	545.112	211.636	-67.584	no cnx
2019_08_22_exp3_TH	Tlx3	ChrimsonR_kv_eyfp_AAV	1	pyramidal	2	245	-23.8437	Point 37	534.96	229.997	-83.774	no cnx
2019_08_22_exp3_TH	Tlx3	ChrimsonR_kv_eyfp_AAV	1	pyramidal	2	245	-23.8437	Point 36	500.567	225.472	-83.774	no cnx
2019_08_22_exp3_TH	Tlx3	ChrimsonR_kv_eyfp_AAV	1	pyramidal	2	245	-23.8437	Point 35	685.837	224.74	-83.774	no cnx
2019_08_22_exp3_TH	Tlx3	ChrimsonR_kv_eyfp_AAV	1	pyramidal	2	245	-23.8437	Point 34	608.902	193.954	-83.774	no cnx
2019_08_22_exp3_TH	Tlx3	ChrimsonR_kv_eyfp_AAV	1	pyramidal	2	245	-23.8437	Point 5	548.512	204.621	-62.424	excitatory	0.0688393
2019_08_22_exp3_TH	Tlx3	ChrimsonR_kv_eyfp_AAV	1	pyramidal	2	245	-23.8437	Point 4	611.223	138.521	-62.424	no cnx
2019_08_22_exp3_TH	Tlx3	ChrimsonR_kv_eyfp_AAV	1	pyramidal	2	245	-23.8437	Point 7	557.399	211.401	-62.424	no cnx
2019_08_22_exp3_TH	Tlx3	ChrimsonR_kv_eyfp_AAV	1	pyramidal	2	245	-23.8437	Point 6	705.051	103.941	-62.424	no cnx
2019_08_22_exp3_TH	Tlx3	ChrimsonR_kv_eyfp_AAV	1	pyramidal	2	245	-23.8437	Point 1	542.678	131.215	-62.424	no cnx
2019_08_22_exp3_TH	Tlx3	ChrimsonR_kv_eyfp_AAV	1	pyramidal	2	245	-23.8437	Point 3	525.469	151.896	-62.424	no cnx
2019_08_22_exp3_TH	Tlx3	ChrimsonR_kv_eyfp_AAV	1	pyramidal	2	245	-23.8437	Point 2	687.693	118.271	-62.424	no cnx
2019_08_22_exp3_TH	Tlx3	ChrimsonR_kv_eyfp_AAV	1	pyramidal	2	245	-23.8437	Point 9	634.709	134.798	-70.324	no cnx
2019_08_22_exp3_TH	Tlx3	ChrimsonR_kv_eyfp_AAV	1	pyramidal	2	245	-23.8437	Point 8	520.021	171.831	-70.324	no cnx
2019_08_22_exp3_TH	Tlx3	ChrimsonR_kv_eyfp_AAV	1	pyramidal	2	245	-23.8437	Point 32	526.84	165.537	-83.774	excitatory	0.196302
2019_08_22_exp3_TH	Tlx3	ChrimsonR_kv_eyfp_AAV	1	pyramidal	2	245	-23.8437	Point 42	639.326	136.335	-92.834	no cnx
2019_08_22_exp3_TH	Tlx3	ChrimsonR_kv_eyfp_AAV	1	pyramidal	2	245	-23.8437	Point 43	686.43	138.009	-92.834	no cnx
2019_08_22_exp3_TH	Tlx3	ChrimsonR_kv_eyfp_AAV	1	pyramidal	2	245	-23.8437	Point 40	705.55	173.937	-92.834	no cnx
2019_08_22_exp3_TH	Tlx3	ChrimsonR_kv_eyfp_AAV	1	pyramidal	2	245	-23.8437	Point 41	587.98	166.361	-92.834	no cnx
2019_08_22_exp3_TH	Tlx3	ChrimsonR_kv_eyfp_AAV	1	pyramidal	2	245	-23.8437	Point 28	586.967	220.25	-78.574	no cnx
[truncated: 5,369 more rows]

## Sheet: Fig7D_exc_L23FSI_map
exp_id	presynapticCre	presynapticEffector	headstage	post_class	post_layer	postPia	post_z	MP_ID	prePia	x_ap	pre_z	cnx	peakOfAvg
2020_10_23_exp2_TH	Tlx3	ChrimsonR_kv_eyfp_AAV	1	interneuron	2	219	572.634	Point 5	451.075	106.844	570.664	no cnx
2020_10_23_exp2_TH	Tlx3	ChrimsonR_kv_eyfp_AAV	1	interneuron	2	219	572.634	Point 4	458.449	33.0839	570.664	no cnx
2020_10_23_exp2_TH	Tlx3	ChrimsonR_kv_eyfp_AAV	1	interneuron	2	219	572.634	Point 7	591.831	-84.1301	566.214	no cnx
2020_10_23_exp2_TH	Tlx3	ChrimsonR_kv_eyfp_AAV	1	interneuron	2	219	572.634	Point 6	480.874	-30.4043	566.214	no cnx
2020_10_23_exp2_TH	Tlx3	ChrimsonR_kv_eyfp_AAV	1	interneuron	2	219	572.634	Point 1	429.89	-76.7017	570.654	no cnx
2020_10_23_exp2_TH	Tlx3	ChrimsonR_kv_eyfp_AAV	1	interneuron	2	219	572.634	Point 3	465.742	-44.1844	570.654	no cnx
2020_10_23_exp2_TH	Tlx3	ChrimsonR_kv_eyfp_AAV	1	interneuron	2	219	572.634	Point 2	440.159	-40.8702	570.654	no cnx
2020_10_23_exp2_TH	Tlx3	ChrimsonR_kv_eyfp_AAV	1	interneuron	2	219	572.634	Point 9	589.553	-38.0096	566.214	no cnx
2020_10_23_exp2_TH	Tlx3	ChrimsonR_kv_eyfp_AAV	1	interneuron	2	219	572.634	Point 8	544.049	-4.37135	566.214	no cnx
2020_10_23_exp2_TH	Tlx3	ChrimsonR_kv_eyfp_AAV	1	interneuron	2	219	572.634	Point 11	601.246	27.054	566.214	no cnx
2020_10_23_exp2_TH	Tlx3	ChrimsonR_kv_eyfp_AAV	1	interneuron	2	219	572.634	Point 10	622.735	-32.9379	566.214	no cnx
2020_10_23_exp2_TH	Tlx3	ChrimsonR_kv_eyfp_AAV	1	interneuron	2	219	572.634	Point 13	539.071	90.4447	559.724	no cnx
2020_10_23_exp2_TH	Tlx3	ChrimsonR_kv_eyfp_AAV	1	interneuron	2	219	572.634	Point 12	436.832	45.0116	565.484	no cnx
2020_10_23_exp2_TH	Tlx3	ChrimsonR_kv_eyfp_AAV	1	interneuron	2	219	572.634	Point 15	535.585	-5.81318	559.724	no cnx
2020_10_23_exp2_TH	Tlx3	ChrimsonR_kv_eyfp_AAV	1	interneuron	2	219	572.634	Point 14	467.199	28.0238	559.724	no cnx
2020_10_23_exp2_TH	Tlx3	ChrimsonR_kv_eyfp_AAV	1	interneuron	2	219	572.634	Point 17	442.26	57.7491	565.484	no cnx
2020_10_23_exp2_TH	Tlx3	ChrimsonR_kv_eyfp_AAV	1	interneuron	2	219	572.634	Point 16	602.92	42.5926	559.724	no cnx
2020_10_23_exp2_TH	Tlx3	ChrimsonR_kv_eyfp_AAV	1	interneuron	2	219	572.634	Point 19	441.426	47.2394	556.444	no cnx
2020_10_23_exp2_TH	Tlx3	ChrimsonR_kv_eyfp_AAV	1	interneuron	2	219	572.634	Point 18	437.682	35.4166	558.634	excitatory	0.101678
2020_10_23_exp2_TH	Tlx3	ChrimsonR_kv_eyfp_AAV	1	interneuron	2	219	572.634	Point 20	441.752	68.211	556.444	no cnx
2020_08_21_exp1_TH	Penk	ChrimsonR_kv_eyfp_AAV	3	interneuron	2	133	67.844	Point 11	224.337	141.728	54.564	no cnx
2020_08_21_exp1_TH	Penk	ChrimsonR_kv_eyfp_AAV	3	interneuron	2	133	67.844	Point 10	184.39	174.056	59.584	no cnx
2020_08_21_exp1_TH	Penk	ChrimsonR_kv_eyfp_AAV	3	interneuron	2	133	67.844	Point 13	191.911	205.225	45.364	no cnx
2020_08_21_exp1_TH	Penk	ChrimsonR_kv_eyfp_AAV	3	interneuron	2	133	67.844	Point 12	311.923	64.3973	54.564	no cnx
2020_08_21_exp1_TH	Penk	ChrimsonR_kv_eyfp_AAV	3	interneuron	2	133	67.844	Point 15	88.7701	143.601	45.364	no cnx
2020_08_21_exp1_TH	Penk	ChrimsonR_kv_eyfp_AAV	3	interneuron	2	133	67.844	Point 14	121.106	156.772	45.364	no cnx
2020_08_21_exp1_TH	Penk	ChrimsonR_kv_eyfp_AAV	3	interneuron	2	133	67.844	Point 17	238.316	93.2248	45.364	no cnx
2020_08_21_exp1_TH	Penk	ChrimsonR_kv_eyfp_AAV	3	interneuron	2	133	67.844	Point 16	169.557	-10.751	43.054	no cnx
2020_08_21_exp1_TH	Penk	ChrimsonR_kv_eyfp_AAV	3	interneuron	2	133	67.844	Point 19	217.888	-37.0548	43.054	no cnx
2020_08_21_exp1_TH	Penk	ChrimsonR_kv_eyfp_AAV	3	interneuron	2	133	67.844	Point 18	156.642	-39.2035	43.054	excitatory	2.68899
2020_08_21_exp1_TH	Penk	ChrimsonR_kv_eyfp_AAV	3	interneuron	2	133	67.844	Point 31	134.234	202.418	23.344	no cnx
2020_08_21_exp1_TH	Penk	ChrimsonR_kv_eyfp_AAV	3	interneuron	2	133	67.844	Point 30	266.88	113.006	23.344	no cnx
2020_08_21_exp1_TH	Penk	ChrimsonR_kv_eyfp_AAV	3	interneuron	2	133	67.844	Point 37	77.1693	64.6461	15.704	no cnx
2020_08_21_exp1_TH	Penk	ChrimsonR_kv_eyfp_AAV	3	interneuron	2	133	67.844	Point 36	164.553	199.046	15.704	no cnx
2020_08_21_exp1_TH	Penk	ChrimsonR_kv_eyfp_AAV	3	interneuron	2	133	67.844	Point 35	145.868	231.685	15.704	no cnx
2020_08_21_exp1_TH	Penk	ChrimsonR_kv_eyfp_AAV	3	interneuron	2	133	67.844	Point 34	159.628	224.107	23.344	no cnx
2020_08_21_exp1_TH	Penk	ChrimsonR_kv_eyfp_AAV	3	interneuron	2	133	67.844	Point 5	234.271	157.854	68.664	no cnx
2020_08_21_exp1_TH	Penk	ChrimsonR_kv_eyfp_AAV	3	interneuron	2	133	67.844	Point 4	97.3838	133.648	68.664	no cnx
2020_08_21_exp1_TH	Penk	ChrimsonR_kv_eyfp_AAV	3	interneuron	2	133	67.844	Point 7	111.651	69.0382	59.584	no cnx
2020_08_21_exp1_TH	Penk	ChrimsonR_kv_eyfp_AAV	3	interneuron	2	133	67.844	Point 6	144.058	124.961	68.664	no cnx
2020_08_21_exp1_TH	Penk	ChrimsonR_kv_eyfp_AAV	3	interneuron	2	133	67.844	Point 1	140.917	-49.5152	76.574	no cnx
2020_08_21_exp1_TH	Penk	ChrimsonR_kv_eyfp_AAV	3	interneuron	2	133	67.844	Point 3	69.7638	132.321	76.574	no cnx
2020_08_21_exp1_TH	Penk	ChrimsonR_kv_eyfp_AAV	3	interneuron	2	133	67.844	Point 2	297.563	-55.705	76.574	no cnx
2020_08_21_exp1_TH	Penk	ChrimsonR_kv_eyfp_AAV	3	interneuron	2	133	67.844	Point 9	140.577	157.851	59.584	no cnx
2020_08_21_exp1_TH	Penk	ChrimsonR_kv_eyfp_AAV	3	interneuron	2	133	67.844	Point 8	158.68	127.774	59.584	no cnx
2020_08_21_exp1_TH	Penk	ChrimsonR_kv_eyfp_AAV	3	interneuron	2	133	67.844	Point 32	93.2321	197.443	23.344	no cnx
2020_08_21_exp1_TH	Penk	ChrimsonR_kv_eyfp_AAV	3	interneuron	2	133	67.844	Point 48	84.5424	73.1968	47.894	no cnx
2020_08_21_exp1_TH	Penk	ChrimsonR_kv_eyfp_AAV	3	interneuron	2	133	67.844	Point 49	240.627	184.644	47.894	no cnx
2020_08_21_exp1_TH	Penk	ChrimsonR_kv_eyfp_AAV	3	interneuron	2	133	67.844	Point 42	194.363	98.5442	7.464	no cnx
2020_08_21_exp1_TH	Penk	ChrimsonR_kv_eyfp_AAV	3	interneuron	2	133	67.844	Point 43	82.6147	61.9872	7.464	no cnx
2020_08_21_exp1_TH	Penk	ChrimsonR_kv_eyfp_AAV	3	interneuron	2	133	67.844	Point 40	135.904	190.75	7.464	no cnx
2020_08_21_exp1_TH	Penk	ChrimsonR_kv_eyfp_AAV	3	interneuron	2	133	67.844	Point 41	75.4596	124.746	7.464	no cnx
2020_08_21_exp1_TH	Penk	ChrimsonR_kv_eyfp_AAV	3	interneuron	2	133	67.844	Point 46	168.641	115.524	47.894	no cnx
2020_08_21_exp1_TH	Penk	ChrimsonR_kv_eyfp_AAV	3	interneuron	2	133	67.844	Point 47	142.499	134.84	47.894	no cnx
2020_08_21_exp1_TH	Penk	ChrimsonR_kv_eyfp_AAV	3	interneuron	2	133	67.844	Point 44	100.26	76.237	7.464	no cnx
2020_08_21_exp1_TH	Penk	ChrimsonR_kv_eyfp_AAV	3	interneuron	2	133	67.844	Point 45	127.803	174.522	47.894	no cnx
2020_08_21_exp1_TH	Penk	ChrimsonR_kv_eyfp_AAV	3	interneuron	2	133	67.844	Point 28	106.183	123.165	23.344	excitatory	0.0396443
2020_08_21_exp1_TH	Penk	ChrimsonR_kv_eyfp_AAV	3	interneuron	2	133	67.844	Point 29	162.342	149.704	23.344	no cnx
2020_08_21_exp1_TH	Penk	ChrimsonR_kv_eyfp_AAV	3	interneuron	2	133	67.844	Point 20	219.294	-45.5852	43.054	no cnx
2020_08_21_exp1_TH	Penk	ChrimsonR_kv_eyfp_AAV	3	interneuron	2	133	67.844	Point 21	114.658	3.68187	35.484	excitatory	3.89725
2020_08_21_exp1_TH	Penk	ChrimsonR_kv_eyfp_AAV	3	interneuron	2	133	67.844	Point 22	140.512	21.4324	35.484	excitatory	1.14586
2020_08_21_exp1_TH	Penk	ChrimsonR_kv_eyfp_AAV	3	interneuron	2	133	67.844	Point 23	190.275	30.0556	35.484	no cnx
2020_08_21_exp1_TH	Penk	ChrimsonR_kv_eyfp_AAV	3	interneuron	2	133	67.844	Point 24	246.849	21.7207	35.484	no cnx
2020_08_21_exp1_TH	Penk	ChrimsonR_kv_eyfp_AAV	3	interneuron	2	133	67.844	Point 25	161.586	20.3934	35.484	excitatory	0.323253
2020_08_21_exp1_TH	Penk	ChrimsonR_kv_eyfp_AAV	3	interneuron	2	133	67.844	Point 26	115.713	21.1136	35.484	no cnx
2020_08_21_exp1_TH	Penk	ChrimsonR_kv_eyfp_AAV	3	interneuron	2	133	67.844	Point 27	180.684	-8.35097	23.344	excitatory	1.39186
2020_08_21_exp1_TH	Penk	ChrimsonR_kv_eyfp_AAV	3	interneuron	2	133	67.844	Point 39	200.547	254.848	15.704	no cnx
2020_08_21_exp1_TH	Penk	ChrimsonR_kv_eyfp_AAV	3	interneuron	2	133	67.844	Point 33	274.481	187.104	23.344	no cnx
2020_08_21_exp1_TH	Penk	ChrimsonR_kv_eyfp_AAV	3	interneuron	2	133	67.844	Point 38	102.233	139.919	15.704	no cnx
2020_07_03_exp2_TH	Rorb	ChrimsonR_kv_eyfp_AAV	1	interneuron	2	219	263.274	Point 11	406.599	-87.739	273.074	no cnx
2020_07_03_exp2_TH	Rorb	ChrimsonR_kv_eyfp_AAV	1	interneuron	2	219	263.274	Point 10	344.995	-96.7069	273.074	no cnx
2020_07_03_exp2_TH	Rorb	ChrimsonR_kv_eyfp_AAV	1	interneuron	2	219	263.274	Point 13	437.996	-62.142	273.074	no cnx
2020_07_03_exp2_TH	Rorb	ChrimsonR_kv_eyfp_AAV	1	interneuron	2	219	263.274	Point 12	371.241	-159.159	269.374	excitatory	0.244709
2020_07_03_exp2_TH	Rorb	ChrimsonR_kv_eyfp_AAV	1	interneuron	2	219	263.274	Point 15	411.189	-93.765	273.074	no cnx
2020_07_03_exp2_TH	Rorb	ChrimsonR_kv_eyfp_AAV	1	interneuron	2	219	263.274	Point 14	452.646	-38.0762	273.074	no cnx
2020_07_03_exp2_TH	Rorb	ChrimsonR_kv_eyfp_AAV	1	interneuron	2	219	263.274	Point 17	391.202	-129.869	271.844	no cnx
2020_07_03_exp2_TH	Rorb	ChrimsonR_kv_eyfp_AAV	1	interneuron	2	219	263.274	Point 16	474.745	-85.9222	273.074	no cnx
2020_07_03_exp2_TH	Rorb	ChrimsonR_kv_eyfp_AAV	1	interneuron	2	219	263.274	Point 19	413.944	-139.595	271.844	no cnx
2020_07_03_exp2_TH	Rorb	ChrimsonR_kv_eyfp_AAV	1	interneuron	2	219	263.274	Point 18	336.718	-148.142	271.844	no cnx
2020_07_03_exp2_TH	Rorb	ChrimsonR_kv_eyfp_AAV	1	interneuron	2	219	263.274	Point 5	340.68	-160.889	280.654	no cnx
2020_07_03_exp2_TH	Rorb	ChrimsonR_kv_eyfp_AAV	1	interneuron	2	219	263.274	Point 4	400.992	-131.15	280.654	no cnx
2020_07_03_exp2_TH	Rorb	ChrimsonR_kv_eyfp_AAV	1	interneuron	2	219	263.274	Point 7	405.34	-119.092	280.654	no cnx
2020_07_03_exp2_TH	Rorb	ChrimsonR_kv_eyfp_AAV	1	interneuron	2	219	263.274	Point 6	436.603	-77.0329	280.654	no cnx
2020_07_03_exp2_TH	Rorb	ChrimsonR_kv_eyfp_AAV	1	interneuron	2	219	263.274	Point 1	410.89	-39.0674	280.654	no cnx
2020_07_03_exp2_TH	Rorb	ChrimsonR_kv_eyfp_AAV	1	interneuron	2	219	263.274	Point 3	358.91	-15.0912	280.654	no cnx
2020_07_03_exp2_TH	Rorb	ChrimsonR_kv_eyfp_AAV	1	interneuron	2	219	263.274	Point 2	354.219	-51.6589	280.654	no cnx
2020_07_03_exp2_TH	Rorb	ChrimsonR_kv_eyfp_AAV	1	interneuron	2	219	263.274	Point 9	327.973	31.6968	273.074	no cnx
2020_07_03_exp2_TH	Rorb	ChrimsonR_kv_eyfp_AAV	1	interneuron	2	219	263.274	Point 8	469.816	-66.7864	280.654	no cnx
2020_07_03_exp2_TH	Rorb	ChrimsonR_kv_eyfp_AAV	1	interneuron	2	219	263.274	Point 20	420.094	-177.209	271.844	no cnx
2020_07_03_exp2_TH	Rorb	ChrimsonR_kv_eyfp_AAV	1	interneuron	2	219	263.274	Point 21	397.247	-135.174	284.984	no cnx
2020_07_03_exp2_TH	Rorb	ChrimsonR_kv_eyfp_AAV	1	interneuron	2	219	263.274	Point 22	358.176	-172.732	284.984	no cnx
2020_07_03_exp2_TH	Rorb	ChrimsonR_kv_eyfp_AAV	1	interneuron	2	219	263.274	Point 23	369.076	-172.773	284.984	no cnx
2020_07_03_exp2_TH	Rorb	ChrimsonR_kv_eyfp_AAV	1	interneuron	2	219	263.274	Point 24	383.083	-156.139	284.984	excitatory	0.225508
2020_07_03_exp2_TH	Rorb	ChrimsonR_kv_eyfp_AAV	1	interneuron	2	219	263.274	Point 25	355.703	-164.545	270.174	no cnx
2020_07_03_exp2_TH	Rorb	ChrimsonR_kv_eyfp_AAV	1	interneuron	2	219	263.274	Point 26	403.78	-197.471	270.174	no cnx
2020_07_03_exp2_TH	Rorb	ChrimsonR_kv_eyfp_AAV	1	interneuron	2	219	263.274	Point 27	342.078	-131.186	270.184	no cnx
2020_06_11_exp2_TH	Rorb	Ai167	1	interneuron	2	240	252.874	Point 5	357.55	6.37913	216.434	no cnx
2020_06_11_exp2_TH	Rorb	Ai167	1	interneuron	2	240	252.874	Point 4	345.589	131.413	243.274	no cnx
2020_06_11_exp2_TH	Rorb	Ai167	1	interneuron	2	240	252.874	Point 7	433.15	-32.5793	205.404	excitatory	1.72668
2020_06_11_exp2_TH	Rorb	Ai167	1	interneuron	2	240	252.874	Point 6	485.697	12.109	216.434	excitatory	0.204524
2020_06_11_exp2_TH	Rorb	Ai167	1	interneuron	2	240	252.874	Point 1	394.212	152.126	288.104	no cnx
2020_06_11_exp2_TH	Rorb	Ai167	1	interneuron	2	240	252.874	Point 3	349.811	-19.9491	250.604	no cnx
2020_06_11_exp2_TH	Rorb	Ai167	1	interneuron	2	240	252.874	Point 2	372.584	127.216	277.834	no cnx
2020_06_11_exp2_TH	Rorb	Ai167	1	interneuron	2	240	252.874	Point 8	525.088	-72.9552	205.404	excitatory	0.364662
2020_06_11_exp2_TH	Rorb	Ai167	1	interneuron	2	240	252.874	Point 12	501.218	22.7147	231.294	no cnx
2020_05_28_exp2_TH	Rorb	ChrimsonR_kv_eyfp_AAV	1	interneuron	2	240	118.954	Point 11	317.981	-143.635	123.244	no cnx
2020_05_28_exp2_TH	Rorb	ChrimsonR_kv_eyfp_AAV	1	interneuron	2	240	118.954	Point 10	366.389	-149.604	123.244	no cnx
2020_05_28_exp2_TH	Rorb	ChrimsonR_kv_eyfp_AAV	1	interneuron	2	240	118.954	Point 13	352.53	67.6436	123.244	no cnx
2020_05_28_exp2_TH	Rorb	ChrimsonR_kv_eyfp_AAV	1	interneuron	2	240	118.954	Point 12	329.933	-119.077	123.244	no cnx
2020_05_28_exp2_TH	Rorb	ChrimsonR_kv_eyfp_AAV	1	interneuron	2	240	118.954	Point 15	460.98	15.3463	123.244	no cnx
2020_05_28_exp2_TH	Rorb	ChrimsonR_kv_eyfp_AAV	1	interneuron	2	240	118.954	Point 14	367.489	15.753	123.244	excitatory	0.156006
2020_05_28_exp2_TH	Rorb	ChrimsonR_kv_eyfp_AAV	1	interneuron	2	240	118.954	Point 17	324.045	1.26685	114.444	excitatory	1.13616
2020_05_28_exp2_TH	Rorb	ChrimsonR_kv_eyfp_AAV	1	interneuron	2	240	118.954	Point 16	513.645	-91.4944	123.244	no cnx
2020_05_28_exp2_TH	Rorb	ChrimsonR_kv_eyfp_AAV	1	interneuron	2	240	118.954	Point 19	397.242	11.572	117.654	no cnx
2020_05_28_exp2_TH	Rorb	ChrimsonR_kv_eyfp_AAV	1	interneuron	2	240	118.954	Point 18	335.344	-31.2391	117.654	no cnx
2020_05_28_exp2_TH	Rorb	ChrimsonR_kv_eyfp_AAV	1	interneuron	2	240	118.954	Point 31	506.344	105.73	105.164	no cnx
2020_05_28_exp2_TH	Rorb	ChrimsonR_kv_eyfp_AAV	1	interneuron	2	240	118.954	Point 30	470.004	118.73	96.194	excitatory
2020_05_28_exp2_TH	Rorb	ChrimsonR_kv_eyfp_AAV	1	interneuron	2	240	118.954	Point 5	345.583	43.1584	126.674	no cnx
2020_05_28_exp2_TH	Rorb	ChrimsonR_kv_eyfp_AAV	1	interneuron	2	240	118.954	Point 4	451.812	-46.2846	126.674	no cnx
2020_05_28_exp2_TH	Rorb	ChrimsonR_kv_eyfp_AAV	1	interneuron	2	240	118.954	Point 7	337.754	92.5299	126.674	no cnx
2020_05_28_exp2_TH	Rorb	ChrimsonR_kv_eyfp_AAV	1	interneuron	2	240	118.954	Point 6	488.694	-28.4485	126.674	no cnx
2020_05_28_exp2_TH	Rorb	ChrimsonR_kv_eyfp_AAV	1	interneuron	2	240	118.954	Point 1	344.335	57.2065	126.674	no cnx
2020_05_28_exp2_TH	Rorb	ChrimsonR_kv_eyfp_AAV	1	interneuron	2	240	118.954	Point 3	406.225	-113.056	126.674	no cnx
2020_05_28_exp2_TH	Rorb	ChrimsonR_kv_eyfp_AAV	1	interneuron	2	240	118.954	Point 2	351.921	-45.4645	126.674	no cnx
2020_05_28_exp2_TH	Rorb	ChrimsonR_kv_eyfp_AAV	1	interneuron	2	240	118.954	Point 9	349.169	78.2721	123.244	no cnx
2020_05_28_exp2_TH	Rorb	ChrimsonR_kv_eyfp_AAV	1	interneuron	2	240	118.954	Point 8	376.14	55.1689	126.674	no cnx
2020_05_28_exp2_TH	Rorb	ChrimsonR_kv_eyfp_AAV	1	interneuron	2	240	118.954	Point 32	474.456	136.649	96.194	no cnx
2020_05_28_exp2_TH	Rorb	ChrimsonR_kv_eyfp_AAV	1	interneuron	2	240	118.954	Point 28	367.332	-67.3061	108.514	no cnx
2020_05_28_exp2_TH	Rorb	ChrimsonR_kv_eyfp_AAV	1	interneuron	2	240	118.954	Point 29	485.049	87.1525	96.194	excitatory	0.305312
2020_05_28_exp2_TH	Rorb	ChrimsonR_kv_eyfp_AAV	1	interneuron	2	240	118.954	Point 20	323.922	-23.0423	117.654	no cnx
2020_05_28_exp2_TH	Rorb	ChrimsonR_kv_eyfp_AAV	1	interneuron	2	240	118.954	Point 21	323.299	1.69229	106.704	no cnx
2020_05_28_exp2_TH	Rorb	ChrimsonR_kv_eyfp_AAV	1	interneuron	2	240	118.954	Point 22	309.742	-24.5187	106.704	no cnx
2020_05_28_exp2_TH	Rorb	ChrimsonR_kv_eyfp_AAV	1	interneuron	2	240	118.954	Point 23	333.364	44.1439	106.704	no cnx
2020_05_28_exp2_TH	Rorb	ChrimsonR_kv_eyfp_AAV	1	interneuron	2	240	118.954	Point 24	475.617	67.9673	108.514	no cnx
2020_05_28_exp2_TH	Rorb	ChrimsonR_kv_eyfp_AAV	1	interneuron	2	240	118.954	Point 25	436.089	119.007	108.514	no cnx
2020_05_28_exp2_TH	Rorb	ChrimsonR_kv_eyfp_AAV	1	interneuron	2	240	118.954	Point 26	485.309	-54.5076	108.514	no cnx
2020_05_28_exp2_TH	Rorb	ChrimsonR_kv_eyfp_AAV	1	interneuron	2	240	118.954	Point 27	385.594	-61.241	108.514	no cnx
2020_05_28_exp2_TH	Rorb	ChrimsonR_kv_eyfp_AAV	1	interneuron	2	240	118.954	Point 33	511.64	73.9514	105.164	no cnx
2020_05_28_exp2_TH	Rorb	ChrimsonR_kv_eyfp_AAV	0	interneuron	2	235	107.274	Point 10	366.115	-30.0265	123.244	no cnx
2020_05_28_exp2_TH	Rorb	ChrimsonR_kv_eyfp_AAV	0	interneuron	2	235	107.274	Point 12	329.659	0.501164	123.244	excitatory	0.875349
2020_05_28_exp2_TH	Rorb	ChrimsonR_kv_eyfp_AAV	0	interneuron	2	235	107.274	Point 14	367.215	135.331	123.244	no cnx
2020_05_28_exp2_TH	Rorb	ChrimsonR_kv_eyfp_AAV	0	interneuron	2	235	107.274	Point 16	513.372	28.0834	123.244	no cnx
2020_05_28_exp2_TH	Rorb	ChrimsonR_kv_eyfp_AAV	0	interneuron	2	235	107.274	Point 5	345.31	162.736	126.674	no cnx
2020_05_28_exp2_TH	Rorb	ChrimsonR_kv_eyfp_AAV	0	interneuron	2	235	107.274	Point 4	451.539	73.2932	126.674	no cnx
2020_05_28_exp2_TH	Rorb	ChrimsonR_kv_eyfp_AAV	0	interneuron	2	235	107.274	Point 7	337.481	212.108	126.674	no cnx
2020_05_28_exp2_TH	Rorb	ChrimsonR_kv_eyfp_AAV	0	interneuron	2	235	107.274	Point 6	488.42	91.1293	126.674	no cnx
2020_05_28_exp2_TH	Rorb	ChrimsonR_kv_eyfp_AAV	0	interneuron	2	235	107.274	Point 1	344.062	176.784	126.674	no cnx
2020_05_28_exp2_TH	Rorb	ChrimsonR_kv_eyfp_AAV	0	interneuron	2	235	107.274	Point 3	405.951	6.52199	126.674	no cnx
2020_05_28_exp2_TH	Rorb	ChrimsonR_kv_eyfp_AAV	0	interneuron	2	235	107.274	Point 2	351.647	74.1133	126.674	no cnx
2020_05_28_exp2_TH	Rorb	ChrimsonR_kv_eyfp_AAV	0	interneuron	2	235	107.274	Point 9	348.895	197.85	123.244	no cnx
2020_05_28_exp2_TH	Rorb	ChrimsonR_kv_eyfp_AAV	0	interneuron	2	235	107.274	Point 8	375.866	174.747	126.674	no cnx
2020_05_27_exp3_TH	Penk	ChrimsonR_kv_eyfp_AAV	0	interneuron	2	185	63.6512	Point 11	234.15	79.9643	46.841	no cnx
2020_05_27_exp3_TH	Penk	ChrimsonR_kv_eyfp_AAV	0	interneuron	2	185	63.6512	Point 10	176.778	-82.6858	46.841	no cnx
2020_05_27_exp3_TH	Penk	ChrimsonR_kv_eyfp_AAV	0	interneuron	2	185	63.6512	Point 13	195.92	-86.8029	50.661	excitatory	0.4831
2020_05_27_exp3_TH	Penk	ChrimsonR_kv_eyfp_AAV	0	interneuron	2	185	63.6512	Point 12	268.746	42.2753	50.661	excitatory	0.666521
2020_05_27_exp3_TH	Penk	ChrimsonR_kv_eyfp_AAV	0	interneuron	2	185	63.6512	Point 15	144.43	56.7296	46.841	no cnx
2020_05_27_exp3_TH	Penk	ChrimsonR_kv_eyfp_AAV	0	interneuron	2	185	63.6512	Point 14	197.383	-141.284	46.841	no cnx
2020_05_27_exp3_TH	Penk	ChrimsonR_kv_eyfp_AAV	0	interneuron	2	185	63.6512	Point 17	236.703	1.01596	41.561	excitatory	0.0825916
2020_05_27_exp3_TH	Penk	ChrimsonR_kv_eyfp_AAV	0	interneuron	2	185	63.6512	Point 16	205.054	-4.13911	41.561	excitatory	1.23545
2020_05_27_exp3_TH	Penk	ChrimsonR_kv_eyfp_AAV	0	interneuron	2	185	63.6512	Point 19	188.582	126.335	35.851	no cnx
2020_05_27_exp3_TH	Penk	ChrimsonR_kv_eyfp_AAV	0	interneuron	2	185	63.6512	Point 18	178.263	56.807	35.851	no cnx
2020_05_27_exp3_TH	Penk	ChrimsonR_kv_eyfp_AAV	0	interneuron	2	185	63.6512	Point 31	139.453	-83.1682	45.861	no cnx
2020_05_27_exp3_TH	Penk	ChrimsonR_kv_eyfp_AAV	0	interneuron	2	185	63.6512	Point 30	249.982	-124.951	50.701	no cnx
2020_05_27_exp3_TH	Penk	ChrimsonR_kv_eyfp_AAV	0	interneuron	2	185	63.6512	Point 37	190.947	-150.333	45.861	no cnx
2020_05_27_exp3_TH	Penk	ChrimsonR_kv_eyfp_AAV	0	interneuron	2	185	63.6512	Point 36	290.838	-179.299	45.861	no cnx
2020_05_27_exp3_TH	Penk	ChrimsonR_kv_eyfp_AAV	0	interneuron	2	185	63.6512	Point 35	180.022	-134.52	45.861	no cnx
2020_05_27_exp3_TH	Penk	ChrimsonR_kv_eyfp_AAV	0	interneuron	2	185	63.6512	Point 34	182.961	-234.756	45.861	no cnx
2020_05_27_exp3_TH	Penk	ChrimsonR_kv_eyfp_AAV	0	interneuron	2	185	63.6512	Point 5	198.924	-103.631	51.061	excitatory	0.142098
2020_05_27_exp3_TH	Penk	ChrimsonR_kv_eyfp_AAV	0	interneuron	2	185	63.6512	Point 4	269.327	-97.201	49.671	no cnx
2020_05_27_exp3_TH	Penk	ChrimsonR_kv_eyfp_AAV	0	interneuron	2	185	63.6512	Point 7	177.808	-169.014	49.671	no cnx
2020_05_27_exp3_TH	Penk	ChrimsonR_kv_eyfp_AAV	0	interneuron	2	185	63.6512	Point 6	232.715	-134.324	51.061	excitatory	0.806555
2020_05_27_exp3_TH	Penk	ChrimsonR_kv_eyfp_AAV	0	interneuron	2	185	63.6512	Point 1	168.776	-43.0204	51.061	no cnx
2020_05_27_exp3_TH	Penk	ChrimsonR_kv_eyfp_AAV	0	interneuron	2	185	63.6512	Point 3	192.155	-77.9339	49.671	no cnx
2020_05_27_exp3_TH	Penk	ChrimsonR_kv_eyfp_AAV	0	interneuron	2	185	63.6512	Point 2	257.852	32.7424	49.671	no cnx
2020_05_27_exp3_TH	Penk	ChrimsonR_kv_eyfp_AAV	0	interneuron	2	185	63.6512	Point 9	205.947	-91.8689	51.061	excitatory	0.156263
2020_05_27_exp3_TH	Penk	ChrimsonR_kv_eyfp_AAV	0	interneuron	2	185	63.6512	Point 8	334.649	-125.042	51.061	no cnx
2020_05_27_exp3_TH	Penk	ChrimsonR_kv_eyfp_AAV	0	interneuron	2	185	63.6512	Point 32	223.504	-2.17299	45.861	excitatory	0.133703
2020_05_27_exp3_TH	Penk	ChrimsonR_kv_eyfp_AAV	0	interneuron	2	185	63.6512	Point 28	318.642	-164.134	50.701	no cnx
2020_05_27_exp3_TH	Penk	ChrimsonR_kv_eyfp_AAV	0	interneuron	2	185	63.6512	Point 29	324.288	-83.9697	50.701	no cnx
2020_05_27_exp3_TH	Penk	ChrimsonR_kv_eyfp_AAV	0	interneuron	2	185	63.6512	Point 20	249.83	203.312	35.851	no cnx
2020_05_27_exp3_TH	Penk	ChrimsonR_kv_eyfp_AAV	0	interneuron	2	185	63.6512	Point 21	190.869	55.7529	35.851	no cnx
2020_05_27_exp3_TH	Penk	ChrimsonR_kv_eyfp_AAV	0	interneuron	2	185	63.6512	Point 22	246.889	140.5	35.851	no cnx
2020_05_27_exp3_TH	Penk	ChrimsonR_kv_eyfp_AAV	0	interneuron	2	185	63.6512	Point 23	203.499	119.527	41.561	excitatory	0.13635
2020_05_27_exp3_TH	Penk	ChrimsonR_kv_eyfp_AAV	0	interneuron	2	185	63.6512	Point 24	138.814	-249.502	50.701	no cnx
2020_05_27_exp3_TH	Penk	ChrimsonR_kv_eyfp_AAV	0	interneuron	2	185	63.6512	Point 25	181.389	-151.047	50.701	no cnx
2020_05_27_exp3_TH	Penk	ChrimsonR_kv_eyfp_AAV	0	interneuron	2	185	63.6512	Point 26	177.851	-229.05	50.701	no cnx
2020_05_27_exp3_TH	Penk	ChrimsonR_kv_eyfp_AAV	0	interneuron	2	185	63.6512	Point 27	213.161	-271.666	50.701	no cnx
2020_05_27_exp3_TH	Penk	ChrimsonR_kv_eyfp_AAV	0	interneuron	2	185	63.6512	Point 33	196.785	-169.475	45.861	no cnx
2020_05_26_exp2_TH	Penk	ChrimsonR_kv_eyfp_AAV	3	interneuron	2	171	0.950862	Point 51	176.285	204.147	-41.099	no cnx
2020_05_26_exp2_TH	Penk	ChrimsonR_kv_eyfp_AAV	3	interneuron	2	171	0.950862	Point 50	122.1	179.088	-41.099	no cnx
2020_05_26_exp2_TH	Penk	ChrimsonR_kv_eyfp_AAV	3	interneuron	2	171	0.950862	Point 11	171.029	-203.101	8.881	no cnx
2020_05_26_exp2_TH	Penk	ChrimsonR_kv_eyfp_AAV	3	interneuron	2	171	0.950862	Point 13	160.193	-85.2786	8.881	no cnx
2020_05_26_exp2_TH	Penk	ChrimsonR_kv_eyfp_AAV	3	interneuron	2	171	0.950862	Point 12	141.083	-249.456	8.881	no cnx
2020_05_26_exp2_TH	Penk	ChrimsonR_kv_eyfp_AAV	3	interneuron	2	171	0.950862	Point 15	149.117	-23.9712	8.881	no cnx
2020_05_26_exp2_TH	Penk	ChrimsonR_kv_eyfp_AAV	3	interneuron	2	171	0.950862	Point 14	319.695	-75.4335	8.881	no cnx
2020_05_26_exp2_TH	Penk	ChrimsonR_kv_eyfp_AAV	3	interneuron	2	171	0.950862	Point 17	305.336	57.3837	-0.129	no cnx
2020_05_26_exp2_TH	Penk	ChrimsonR_kv_eyfp_AAV	3	interneuron	2	171	0.950862	Point 16	310.899	-31.6852	8.881	no cnx
2020_05_26_exp2_TH	Penk	ChrimsonR_kv_eyfp_AAV	3	interneuron	2	171	0.950862	Point 19	160.822	-124.82	-0.129	excitatory	0.148229
2020_05_26_exp2_TH	Penk	ChrimsonR_kv_eyfp_AAV	3	interneuron	2	171	0.950862	Point 18	201.038	-94.7652	-0.129	no cnx
2020_05_26_exp2_TH	Penk	ChrimsonR_kv_eyfp_AAV	3	interneuron	2	171	0.950862	Point 31	256.386	-58.3907	-18.389	no cnx
2020_05_26_exp2_TH	Penk	ChrimsonR_kv_eyfp_AAV	3	interneuron	2	171	0.950862	Point 30	122.906	-99.6393	-18.389	no cnx
2020_05_26_exp2_TH	Penk	ChrimsonR_kv_eyfp_AAV	3	interneuron	2	171	0.950862	Point 37	108.619	-49.1586	-29.339	no cnx
2020_05_26_exp2_TH	Penk	ChrimsonR_kv_eyfp_AAV	3	interneuron	2	171	0.950862	Point 35	137.916	-14.361	-18.389	excitatory	1.33284
2020_05_26_exp2_TH	Penk	ChrimsonR_kv_eyfp_AAV	3	interneuron	2	171	0.950862	Point 34	109.976	-22.1314	-18.389	excitatory	2.34619
2020_05_26_exp2_TH	Penk	ChrimsonR_kv_eyfp_AAV	3	interneuron	2	171	0.950862	Point 32	122.372	16.5746	-18.389	excitatory	1.11425
2020_05_26_exp2_TH	Penk	ChrimsonR_kv_eyfp_AAV	3	interneuron	2	171	0.950862	Point 48	163.05	224.09	-41.099	no cnx
2020_05_26_exp2_TH	Penk	ChrimsonR_kv_eyfp_AAV	3	interneuron	2	171	0.950862	Point 49	217.981	327.741	-41.099	no cnx
2020_05_26_exp2_TH	Penk	ChrimsonR_kv_eyfp_AAV	3	interneuron	2	171	0.950862	Point 42	163.738	165.387	-29.339	no cnx
2020_05_26_exp2_TH	Penk	ChrimsonR_kv_eyfp_AAV	3	interneuron	2	171	0.950862	Point 43	220.853	61.6017	-28.709	excitatory	0.252342
2020_05_26_exp2_TH	Penk	ChrimsonR_kv_eyfp_AAV	3	interneuron	2	171	0.950862	Point 40	150.026	96.2456	-29.339	no cnx
2020_05_26_exp2_TH	Penk	ChrimsonR_kv_eyfp_AAV	3	interneuron	2	171	0.950862	Point 41	120.361	46.9644	-29.339	no cnx
2020_05_26_exp2_TH	Penk	ChrimsonR_kv_eyfp_AAV	3	interneuron	2	171	0.950862	Point 46	108.515	33.0682	-38.199	excitatory	1.10493
2020_05_26_exp2_TH	Penk	ChrimsonR_kv_eyfp_AAV	3	interneuron	2	171	0.950862	Point 47	140.795	181.566	-38.199	excitatory	0.891767
2020_05_26_exp2_TH	Penk	ChrimsonR_kv_eyfp_AAV	3	interneuron	2	171	0.950862	Point 44	123.771	205.528	-29.339	no cnx
2020_05_26_exp2_TH	Penk	ChrimsonR_kv_eyfp_AAV	3	interneuron	2	171	0.950862	Point 28	101.135	-109.525	-18.389	excitatory	0.492277
2020_05_26_exp2_TH	Penk	ChrimsonR_kv_eyfp_AAV	3	interneuron	2	171	0.950862	Point 29	154.359	-191.901	-18.389	excitatory	0.19283
2020_05_26_exp2_TH	Penk	ChrimsonR_kv_eyfp_AAV	3	interneuron	2	171	0.950862	Point 20	155.792	-212.887	-0.129	no cnx
2020_05_26_exp2_TH	Penk	ChrimsonR_kv_eyfp_AAV	3	interneuron	2	171	0.950862	Point 21	128.291	-184.905	-0.129	no cnx
2020_05_26_exp2_TH	Penk	ChrimsonR_kv_eyfp_AAV	3	interneuron	2	171	0.950862	Point 22	134.332	-29.9025	-0.129	excitatory	3.29159
2020_05_26_exp2_TH	Penk	ChrimsonR_kv_eyfp_AAV	3	interneuron	2	171	0.950862	Point 23	147.373	-127.182	-0.129	no cnx
2020_05_26_exp2_TH	Penk	ChrimsonR_kv_eyfp_AAV	3	interneuron	2	171	0.950862	Point 24	191.874	-137.966	-3.349	no cnx
2020_05_26_exp2_TH	Penk	ChrimsonR_kv_eyfp_AAV	3	interneuron	2	171	0.950862	Point 25	204.5	-123.873	-6.149	no cnx
2020_05_26_exp2_TH	Penk	ChrimsonR_kv_eyfp_AAV	3	interneuron	2	171	0.950862	Point 26	107.819	-154.937	-6.149	no cnx
2020_05_26_exp2_TH	Penk	ChrimsonR_kv_eyfp_AAV	3	interneuron	2	171	0.950862	Point 27	123.383	-28.0771	-3.349	excitatory	1.82777
2020_05_26_exp2_TH	Penk	ChrimsonR_kv_eyfp_AAV	3	interneuron	2	171	0.950862	Point 39	172.402	-5.25108	-29.339	excitatory	0.816928
2020_05_26_exp2_TH	Penk	ChrimsonR_kv_eyfp_AAV	3	interneuron	2	171	0.950862	Point 33	129.08	-115.095	-18.389	excitatory	0.931812
2020_05_26_exp2_TH	Penk	ChrimsonR_kv_eyfp_AAV	3	interneuron	2	171	0.950862	Point 38	208.538	6.903	-29.339	no cnx
2019_08_09_exp3_TH	Tlx3	ChrimsonR_kv_eyfp_AAV	0	interneuron	2	198	327.106	Point 11	715.671	-520.992	340.776	no cnx
2019_08_09_exp3_TH	Tlx3	ChrimsonR_kv_eyfp_AAV	0	interneuron	2	198	327.106	Point 10	582.153	-601.534	340.776	no cnx
2019_08_09_exp3_TH	Tlx3	ChrimsonR_kv_eyfp_AAV	0	interneuron	2	198	327.106	Point 13	548.112	-455.101	376.286	no cnx
2019_08_09_exp3_TH	Tlx3	ChrimsonR_kv_eyfp_AAV	0	interneuron	2	198	327.106	Point 12	572.871	-574.872	340.776	no cnx
2019_08_09_exp3_TH	Tlx3	ChrimsonR_kv_eyfp_AAV	0	interneuron	2	198	327.106	Point 15	647.747	-436.65	376.286	no cnx
2019_08_09_exp3_TH	Tlx3	ChrimsonR_kv_eyfp_AAV	0	interneuron	2	198	327.106	Point 14	664.187	-282.716	376.286	no cnx
2019_08_09_exp3_TH	Tlx3	ChrimsonR_kv_eyfp_AAV	0	interneuron	2	198	327.106	Point 17	688.759	-440.807	376.286	no cnx
2019_08_09_exp3_TH	Tlx3	ChrimsonR_kv_eyfp_AAV	0	interneuron	2	198	327.106	Point 16	541.59	-477.984	376.286	no cnx
2019_08_09_exp3_TH	Tlx3	ChrimsonR_kv_eyfp_AAV	0	interneuron	2	198	327.106	Point 19	565.154	-529.859	371.506	no cnx
2019_08_09_exp3_TH	Tlx3	ChrimsonR_kv_eyfp_AAV	0	interneuron	2	198	327.106	Point 18	558.478	-452.694	371.506	no cnx
2019_08_09_exp3_TH	Tlx3	ChrimsonR_kv_eyfp_AAV	0	interneuron	2	198	327.106	Point 31	480.008	449.024	332.666	no cnx
2019_08_09_exp3_TH	Tlx3	ChrimsonR_kv_eyfp_AAV	0	interneuron	2	198	327.106	Point 30	485.965	-152.571	375.296	no cnx
2019_08_09_exp3_TH	Tlx3	ChrimsonR_kv_eyfp_AAV	0	interneuron	2	198	327.106	Point 37	505.93	394.168	316.776	excitatory	0.696512
2019_08_09_exp3_TH	Tlx3	ChrimsonR_kv_eyfp_AAV	0	interneuron	2	198	327.106	Point 36	453.901	342.212	316.776	no cnx
2019_08_09_exp3_TH	Tlx3	ChrimsonR_kv_eyfp_AAV	0	interneuron	2	198	327.106	Point 35	522.023	459.837	332.666	no cnx
2019_08_09_exp3_TH	Tlx3	ChrimsonR_kv_eyfp_AAV	0	interneuron	2	198	327.106	Point 34	556.398	393.136	332.666	no cnx
2019_08_09_exp3_TH	Tlx3	ChrimsonR_kv_eyfp_AAV	0	interneuron	2	198	327.106	Point 5	596.647	-571.357	351.176	no cnx
2019_08_09_exp3_TH	Tlx3	ChrimsonR_kv_eyfp_AAV	0	interneuron	2	198	327.106	Point 4	722.431	-561.538	357.056	no cnx
2019_08_09_exp3_TH	Tlx3	ChrimsonR_kv_eyfp_AAV	0	interneuron	2	198	327.106	Point 7	710.866	-496.606	351.176	no cnx
2019_08_09_exp3_TH	Tlx3	ChrimsonR_kv_eyfp_AAV	0	interneuron	2	198	327.106	Point 6	612.034	-532.534	351.176	no cnx
2019_08_09_exp3_TH	Tlx3	ChrimsonR_kv_eyfp_AAV	0	interneuron	2	198	327.106	Point 1	556.976	-641.198	357.056	no cnx
2019_08_09_exp3_TH	Tlx3	ChrimsonR_kv_eyfp_AAV	0	interneuron	2	198	327.106	Point 3	570.573	-602.117	357.056	no cnx
2019_08_09_exp3_TH	Tlx3	ChrimsonR_kv_eyfp_AAV	0	interneuron	2	198	327.106	Point 2	625.739	-536.934	357.056	no cnx
2019_08_09_exp3_TH	Tlx3	ChrimsonR_kv_eyfp_AAV	0	interneuron	2	198	327.106	Point 9	618.619	-498.981	340.776	no cnx
2019_08_09_exp3_TH	Tlx3	ChrimsonR_kv_eyfp_AAV	0	interneuron	2	198	327.106	Point 8	611.047	-585.302	340.776	no cnx
2019_08_09_exp3_TH	Tlx3	ChrimsonR_kv_eyfp_AAV	0	interneuron	2	198	327.106	Point 32	543.911	369.613	332.666	no cnx
2019_08_09_exp3_TH	Tlx3	ChrimsonR_kv_eyfp_AAV	0	interneuron	2	198	327.106	Point 28	597.249	-644.084	322.966	no cnx
2019_08_09_exp3_TH	Tlx3	ChrimsonR_kv_eyfp_AAV	0	interneuron	2	198	327.106	Point 29	509.917	-108.986	375.296	no cnx
2019_08_09_exp3_TH	Tlx3	ChrimsonR_kv_eyfp_AAV	0	interneuron	2	198	327.106	Point 20	560.371	-376.615	371.506	no cnx
2019_08_09_exp3_TH	Tlx3	ChrimsonR_kv_eyfp_AAV	0	interneuron	2	198	327.106	Point 21	500.153	-318.618	371.506	no cnx
2019_08_09_exp3_TH	Tlx3	ChrimsonR_kv_eyfp_AAV	0	interneuron	2	198	327.106	Point 22	593.28	-389.373	359.896	no cnx
2019_08_09_exp3_TH	Tlx3	ChrimsonR_kv_eyfp_AAV	0	interneuron	2	198	327.106	Point 23	579.578	-495.384	359.896	no cnx
2019_08_09_exp3_TH	Tlx3	ChrimsonR_kv_eyfp_AAV	0	interneuron	2	198	327.106	Point 24	622.917	-517.131	359.896	no cnx
2019_08_09_exp3_TH	Tlx3	ChrimsonR_kv_eyfp_AAV	0	interneuron	2	198	327.106	Point 25	602.168	-532.275	359.896	no cnx
2019_08_09_exp3_TH	Tlx3	ChrimsonR_kv_eyfp_AAV	0	interneuron	2	198	327.106	Point 26	611.933	-497.753	359.896	no cnx
2019_08_09_exp3_TH	Tlx3	ChrimsonR_kv_eyfp_AAV	0	interneuron	2	198	327.106	Point 27	584.343	-611.904	322.966	no cnx
2019_08_09_exp3_TH	Tlx3	ChrimsonR_kv_eyfp_AAV	0	interneuron	2	198	327.106	Point 33	590.701	425.587	332.666	no cnx
2019_08_09_exp3_TH	Tlx3	ChrimsonR_kv_eyfp_AAV	0	interneuron	2	198	327.106	Point 38	472.004	369.773	316.776	no cnx
2019_08_09_exp2_TH	Tlx3	ChrimsonR_kv_eyfp_AAV	0	interneuron	2	207	207.586	Point 51	741.105	-423.309	231.226	no cnx
2019_08_09_exp2_TH	Tlx3	ChrimsonR_kv_eyfp_AAV	0	interneuron	2	207	207.586	Point 50	593.333	-217.481	231.226	no cnx
2019_08_09_exp2_TH	Tlx3	ChrimsonR_kv_eyfp_AAV	0	interneuron	2	207	207.586	Point 52	616.216	-239.007	231.226	excitatory	0.467156
2019_08_09_exp2_TH	Tlx3	ChrimsonR_kv_eyfp_AAV	0	interneuron	2	207	207.586	Point 11	610.652	-542.457	229.966	no cnx
2019_08_09_exp2_TH	Tlx3	ChrimsonR_kv_eyfp_AAV	0	interneuron	2	207	207.586	Point 10	681.315	-530.184	229.966	no cnx
2019_08_09_exp2_TH	Tlx3	ChrimsonR_kv_eyfp_AAV	0	interneuron	2	207	207.586	Point 13	659.802	-429.738	229.966	no cnx
2019_08_09_exp2_TH	Tlx3	ChrimsonR_kv_eyfp_AAV	0	interneuron	2	207	207.586	Point 12	746.035	-524.7	229.966	no cnx
2019_08_09_exp2_TH	Tlx3	ChrimsonR_kv_eyfp_AAV	0	interneuron	2	207	207.586	Point 15	625.197	-418.746	229.966	no cnx
2019_08_09_exp2_TH	Tlx3	ChrimsonR_kv_eyfp_AAV	0	interneuron	2	207	207.586	Point 14	671.342	-372.948	229.966	excitatory	0.462598
2019_08_09_exp2_TH	Tlx3	ChrimsonR_kv_eyfp_AAV	0	interneuron	2	207	207.586	Point 17	635.077	-485.591	221.816	no cnx
2019_08_09_exp2_TH	Tlx3	ChrimsonR_kv_eyfp_AAV	0	interneuron	2	207	207.586	Point 16	777.288	-504.697	229.966	no cnx
2019_08_09_exp2_TH	Tlx3	ChrimsonR_kv_eyfp_AAV	0	interneuron	2	207	207.586	Point 19	835.232	-575.587	221.816	no cnx
2019_08_09_exp2_TH	Tlx3	ChrimsonR_kv_eyfp_AAV	0	interneuron	2	207	207.586	Point 18	672.377	-604.909	221.816	no cnx
2019_08_09_exp2_TH	Tlx3	ChrimsonR_kv_eyfp_AAV	0	interneuron	2	207	207.586	Point 31	746.151	-501.182	221.596	no cnx
2019_08_09_exp2_TH	Tlx3	ChrimsonR_kv_eyfp_AAV	0	interneuron	2	207	207.586	Point 30	650.724	-570.914	221.596	no cnx
2019_08_09_exp2_TH	Tlx3	ChrimsonR_kv_eyfp_AAV	0	interneuron	2	207	207.586	Point 37	613.764	-676.435	221.596	no cnx
2019_08_09_exp2_TH	Tlx3	ChrimsonR_kv_eyfp_AAV	0	interneuron	2	207	207.586	Point 36	728.991	-428.574	221.596	no cnx
2019_08_09_exp2_TH	Tlx3	ChrimsonR_kv_eyfp_AAV	0	interneuron	2	207	207.586	Point 35	644.456	-661.792	221.596	no cnx
2019_08_09_exp2_TH	Tlx3	ChrimsonR_kv_eyfp_AAV	0	interneuron	2	207	207.586	Point 34	680.556	-452.901	221.596	no cnx
2019_08_09_exp2_TH	Tlx3	ChrimsonR_kv_eyfp_AAV	0	interneuron	2	207	207.586	Point 5	587.196	-395.185	249.206	no cnx
2019_08_09_exp2_TH	Tlx3	ChrimsonR_kv_eyfp_AAV	0	interneuron	2	207	207.586	Point 4	654.042	-475.071	249.206	no cnx
2019_08_09_exp2_TH	Tlx3	ChrimsonR_kv_eyfp_AAV	0	interneuron	2	207	207.586	Point 7	603.717	-534.689	249.206	no cnx
2019_08_09_exp2_TH	Tlx3	ChrimsonR_kv_eyfp_AAV	0	interneuron	2	207	207.586	Point 6	716.397	-286.599	249.206	no cnx
2019_08_09_exp2_TH	Tlx3	ChrimsonR_kv_eyfp_AAV	0	interneuron	2	207	207.586	Point 1	615.914	-457.042	249.206	no cnx
2019_08_09_exp2_TH	Tlx3	ChrimsonR_kv_eyfp_AAV	0	interneuron	2	207	207.586	Point 3	551.425	-409.935	249.206	no cnx
2019_08_09_exp2_TH	Tlx3	ChrimsonR_kv_eyfp_AAV	0	interneuron	2	207	207.586	Point 2	661.185	-330.138	249.206	no cnx
2019_08_09_exp2_TH	Tlx3	ChrimsonR_kv_eyfp_AAV	0	interneuron	2	207	207.586	Point 9	779.886	-524.341	229.966	no cnx
2019_08_09_exp2_TH	Tlx3	ChrimsonR_kv_eyfp_AAV	0	interneuron	2	207	207.586	Point 8	614.09	-408.139	249.206	no cnx
2019_08_09_exp2_TH	Tlx3	ChrimsonR_kv_eyfp_AAV	0	interneuron	2	207	207.586	Point 32	631.312	-671.618	221.596	no cnx
2019_08_09_exp2_TH	Tlx3	ChrimsonR_kv_eyfp_AAV	0	interneuron	2	207	207.586	Point 48	567.816	-388.686	231.226	no cnx
2019_08_09_exp2_TH	Tlx3	ChrimsonR_kv_eyfp_AAV	0	interneuron	2	207	207.586	Point 49	513.418	-303.024	231.226	no cnx
2019_08_09_exp2_TH	Tlx3	ChrimsonR_kv_eyfp_AAV	0	interneuron	2	207	207.586	Point 42	725.741	-504.011	221.886	no cnx
2019_08_09_exp2_TH	Tlx3	ChrimsonR_kv_eyfp_AAV	0	interneuron	2	207	207.586	Point 43	747.563	-469.104	221.886	no cnx
2019_08_09_exp2_TH	Tlx3	ChrimsonR_kv_eyfp_AAV	0	interneuron	2	207	207.586	Point 40	588.994	-683.708	221.886	no cnx
2019_08_09_exp2_TH	Tlx3	ChrimsonR_kv_eyfp_AAV	0	interneuron	2	207	207.586	Point 41	708.639	-532.099	221.886	no cnx
2019_08_09_exp2_TH	Tlx3	ChrimsonR_kv_eyfp_AAV	0	interneuron	2	207	207.586	Point 46	620.328	-485.644	221.886	no cnx
2019_08_09_exp2_TH	Tlx3	ChrimsonR_kv_eyfp_AAV	0	interneuron	2	207	207.586	Point 47	675.276	-283.677	231.226	no cnx
2019_08_09_exp2_TH	Tlx3	ChrimsonR_kv_eyfp_AAV	0	interneuron	2	207	207.586	Point 44	693.951	-515.737	221.886	no cnx
2019_08_09_exp2_TH	Tlx3	ChrimsonR_kv_eyfp_AAV	0	interneuron	2	207	207.586	Point 45	594.041	-540.427	221.886	no cnx
2019_08_09_exp2_TH	Tlx3	ChrimsonR_kv_eyfp_AAV	0	interneuron	2	207	207.586	Point 28	635.967	-627.517	221.596	no cnx
2019_08_09_exp2_TH	Tlx3	ChrimsonR_kv_eyfp_AAV	0	interneuron	2	207	207.586	Point 29	747.549	-676.631	221.596	no cnx
2019_08_09_exp2_TH	Tlx3	ChrimsonR_kv_eyfp_AAV	0	interneuron	2	207	207.586	Point 20	700.627	-463.279	221.816	no cnx
2019_08_09_exp2_TH	Tlx3	ChrimsonR_kv_eyfp_AAV	0	interneuron	2	207	207.586	Point 21	800.546	-573.71	221.816	no cnx
2019_08_09_exp2_TH	Tlx3	ChrimsonR_kv_eyfp_AAV	0	interneuron	2	207	207.586	Point 22	723.708	-395.683	221.816	no cnx
2019_08_09_exp2_TH	Tlx3	ChrimsonR_kv_eyfp_AAV	0	interneuron	2	207	207.586	Point 23	723.576	-463.53	221.816	no cnx
2019_08_09_exp2_TH	Tlx3	ChrimsonR_kv_eyfp_AAV	0	interneuron	2	207	207.586	Point 24	575.401	-485.82	221.816	no cnx
2019_08_09_exp2_TH	Tlx3	ChrimsonR_kv_eyfp_AAV	0	interneuron	2	207	207.586	Point 25	614.291	-548.268	221.816	no cnx
2019_08_09_exp2_TH	Tlx3	ChrimsonR_kv_eyfp_AAV	0	interneuron	2	207	207.586	Point 26	631.807	-577.156	221.816	no cnx
2019_08_09_exp2_TH	Tlx3	ChrimsonR_kv_eyfp_AAV	0	interneuron	2	207	207.586	Point 27	659.777	-723.63	221.596	no cnx
2019_08_09_exp2_TH	Tlx3	ChrimsonR_kv_eyfp_AAV	0	interneuron	2	207	207.586	Point 39	595.089	-709.353	221.886	no cnx
2019_08_09_exp2_TH	Tlx3	ChrimsonR_kv_eyfp_AAV	0	interneuron	2	207	207.586	Point 33	662.196	-702.537	221.596	no cnx
2019_08_09_exp2_TH	Tlx3	ChrimsonR_kv_eyfp_AAV	0	interneuron	2	207	207.586	Point 38	635.895	-732.839	221.886	no cnx
2019_05_29_exp2_TH	Rorb	ChrimsonR_kv_eyfp_AAV	0	interneuron	2	248	612.805	Point 11	479.268	127.362	584.195	excitatory	0.204569
2019_05_29_exp2_TH	Rorb	ChrimsonR_kv_eyfp_AAV	0	interneuron	2	248	612.805	Point 10	510.529	60.5671	584.195	no cnx
2019_05_29_exp2_TH	Rorb	ChrimsonR_kv_eyfp_AAV	0	interneuron	2	248	612.805	Point 13	484.564	44.6919	575.665	no cnx
2019_05_29_exp2_TH	Rorb	ChrimsonR_kv_eyfp_AAV	0	interneuron	2	248	612.805	Point 12	574.117	209.314	575.665	no cnx
2019_05_29_exp2_TH	Rorb	ChrimsonR_kv_eyfp_AAV	0	interneuron	2	248	612.805	Point 15	543.562	66.7634	575.665	no cnx
2019_05_29_exp2_TH	Rorb	ChrimsonR_kv_eyfp_AAV	0	interneuron	2	248	612.805	Point 14	598.557	49.6227	575.665	no cnx
2019_05_29_exp2_TH	Rorb	ChrimsonR_kv_eyfp_AAV	0	interneuron	2	248	612.805	Point 17	503.125	42.8752	575.665	no cnx
2019_05_29_exp2_TH	Rorb	ChrimsonR_kv_eyfp_AAV	0	interneuron	2	248	612.805	Point 16	585.063	177.115	575.665	no cnx
2019_05_29_exp2_TH	Rorb	ChrimsonR_kv_eyfp_AAV	0	interneuron	2	248	612.805	Point 19	519.174	46.8482	575.665	no cnx
2019_05_29_exp2_TH	Rorb	ChrimsonR_kv_eyfp_AAV	0	interneuron	2	248	612.805	Point 18	508.236	-20.3662	575.665	no cnx
2019_05_29_exp2_TH	Rorb	ChrimsonR_kv_eyfp_AAV	0	interneuron	2	248	612.805	Point 31	298.283	-9.70963	601.005	excitatory	0.350834
2019_05_29_exp2_TH	Rorb	ChrimsonR_kv_eyfp_AAV	0	interneuron	2	248	612.805	Point 30	292.999	-96.6338	601.005	no cnx
2019_05_29_exp2_TH	Rorb	ChrimsonR_kv_eyfp_AAV	0	interneuron	2	248	612.805	Point 37	346.775	-22.1376	601.005	no cnx
2019_05_29_exp2_TH	Rorb	ChrimsonR_kv_eyfp_AAV	0	interneuron	2	248	612.805	Point 36	341.103	190.539	601.005	no cnx
2019_05_29_exp2_TH	Rorb	ChrimsonR_kv_eyfp_AAV	0	interneuron	2	248	612.805	Point 35	317.639	-85.1493	601.005	no cnx
2019_05_29_exp2_TH	Rorb	ChrimsonR_kv_eyfp_AAV	0	interneuron	2	248	612.805	Point 34	303.74	190.586	601.005	no cnx
2019_05_29_exp2_TH	Rorb	ChrimsonR_kv_eyfp_AAV	0	interneuron	2	248	612.805	Point 5	458.56	42.167	584.195	no cnx
2019_05_29_exp2_TH	Rorb	ChrimsonR_kv_eyfp_AAV	0	interneuron	2	248	612.805	Point 4	468.691	94.0908	584.195	no cnx
2019_05_29_exp2_TH	Rorb	ChrimsonR_kv_eyfp_AAV	0	interneuron	2	248	612.805	Point 7	530.635	32.8697	584.195	no cnx
2019_05_29_exp2_TH	Rorb	ChrimsonR_kv_eyfp_AAV	0	interneuron	2	248	612.805	Point 6	460.479	217.804	584.195	no cnx
2019_05_29_exp2_TH	Rorb	ChrimsonR_kv_eyfp_AAV	0	interneuron	2	248	612.805	Point 1	485.646	71.003	584.195	no cnx
2019_05_29_exp2_TH	Rorb	ChrimsonR_kv_eyfp_AAV	0	interneuron	2	248	612.805	Point 3	451.969	269.144	584.195	no cnx
2019_05_29_exp2_TH	Rorb	ChrimsonR_kv_eyfp_AAV	0	interneuron	2	248	612.805	Point 2	500.738	172.919	584.195	no cnx
2019_05_29_exp2_TH	Rorb	ChrimsonR_kv_eyfp_AAV	0	interneuron	2	248	612.805	Point 9	509.555	139.89	584.195	no cnx
2019_05_29_exp2_TH	Rorb	ChrimsonR_kv_eyfp_AAV	0	interneuron	2	248	612.805	Point 8	493.412	96.8753	584.195	no cnx
2019_05_29_exp2_TH	Rorb	ChrimsonR_kv_eyfp_AAV	0	interneuron	2	248	612.805	Point 32	263.333	92.2134	601.005	excitatory	0.411529
2019_05_29_exp2_TH	Rorb	ChrimsonR_kv_eyfp_AAV	0	interneuron	2	248	612.805	Point 28	500.826	-56.5815	567.045	no cnx
2019_05_29_exp2_TH	Rorb	ChrimsonR_kv_eyfp_AAV	0	interneuron	2	248	612.805	Point 29	473.584	277.204	567.045	no cnx
2019_05_29_exp2_TH	Rorb	ChrimsonR_kv_eyfp_AAV	0	interneuron	2	248	612.805	Point 20	462.854	205.194	575.665	no cnx
2019_05_29_exp2_TH	Rorb	ChrimsonR_kv_eyfp_AAV	0	interneuron	2	248	612.805	Point 21	596.285	74.8229	575.665	excitatory	0.447991
2019_05_29_exp2_TH	Rorb	ChrimsonR_kv_eyfp_AAV	0	interneuron	2	248	612.805	Point 22	519.17	-19.6468	567.045	no cnx
2019_05_29_exp2_TH	Rorb	ChrimsonR_kv_eyfp_AAV	0	interneuron	2	248	612.805	Point 23	581.793	30.2363	567.045	no cnx
2019_05_29_exp2_TH	Rorb	ChrimsonR_kv_eyfp_AAV	0	interneuron	2	248	612.805	Point 24	469.189	-23.396	567.045	no cnx
2019_05_29_exp2_TH	Rorb	ChrimsonR_kv_eyfp_AAV	0	interneuron	2	248	612.805	Point 25	467.109	31.6356	567.045	no cnx
2019_05_29_exp2_TH	Rorb	ChrimsonR_kv_eyfp_AAV	0	interneuron	2	248	612.805	Point 26	487.843	231.277	567.045	no cnx
2019_05_29_exp2_TH	Rorb	ChrimsonR_kv_eyfp_AAV	0	interneuron	2	248	612.805	Point 27	547.914	240.398	567.045	no cnx
2019_05_29_exp2_TH	Rorb	ChrimsonR_kv_eyfp_AAV	0	interneuron	2	248	612.805	Point 33	351.851	-71.6188	601.005	no cnx
2019_04_05_exp1_TH	Rorb	ChrimsonR_kv_eyfp_AAV	1	interneuron	2	224	200.385	Point 50	495.673	265.367	165.675	no cnx
2019_04_05_exp1_TH	Rorb	ChrimsonR_kv_eyfp_AAV	1	interneuron	2	224	200.385	Point 11	555.923	59.5825	164.805	no cnx
2019_04_05_exp1_TH	Rorb	ChrimsonR_kv_eyfp_AAV	1	interneuron	2	224	200.385	Point 10	345.464	-73.9122	164.805	no cnx
2019_04_05_exp1_TH	Rorb	ChrimsonR_kv_eyfp_AAV	1	interneuron	2	224	200.385	Point 13	513.288	-27.2189	171.915	no cnx
2019_04_05_exp1_TH	Rorb	ChrimsonR_kv_eyfp_AAV	1	interneuron	2	224	200.385	Point 12	352.378	10.6422	164.805	no cnx
2019_04_05_exp1_TH	Rorb	ChrimsonR_kv_eyfp_AAV	1	interneuron	2	224	200.385	Point 15	518.367	40.1621	168.935	no cnx
2019_04_05_exp1_TH	Rorb	ChrimsonR_kv_eyfp_AAV	1	interneuron	2	224	200.385	Point 14	330.043	81.7949	168.935	no cnx
2019_04_05_exp1_TH	Rorb	ChrimsonR_kv_eyfp_AAV	1	interneuron	2	224	200.385	Point 17	510.125	215.82	168.935	no cnx
2019_04_05_exp1_TH	Rorb	ChrimsonR_kv_eyfp_AAV	1	interneuron	2	224	200.385	Point 16	348.886	145.001	168.935	no cnx
2019_04_05_exp1_TH	Rorb	ChrimsonR_kv_eyfp_AAV	1	interneuron	2	224	200.385	Point 19	410.134	122.69	168.935	no cnx
2019_04_05_exp1_TH	Rorb	ChrimsonR_kv_eyfp_AAV	1	interneuron	2	224	200.385	Point 18	412.282	152.376	168.935	no cnx
2019_04_05_exp1_TH	Rorb	ChrimsonR_kv_eyfp_AAV	1	interneuron	2	224	200.385	Point 31	528.841	101.481	187.105	no cnx
2019_04_05_exp1_TH	Rorb	ChrimsonR_kv_eyfp_AAV	1	interneuron	2	224	200.385	Point 30	539.218	-37.1285	198.945	no cnx
2019_04_05_exp1_TH	Rorb	ChrimsonR_kv_eyfp_AAV	1	interneuron	2	224	200.385	Point 37	528.565	-97.2745	175.045	no cnx
2019_04_05_exp1_TH	Rorb	ChrimsonR_kv_eyfp_AAV	1	interneuron	2	224	200.385	Point 36	536.467	99.1828	187.105	no cnx
2019_04_05_exp1_TH	Rorb	ChrimsonR_kv_eyfp_AAV	1	interneuron	2	224	200.385	Point 35	555.223	144.256	187.105	no cnx
2019_04_05_exp1_TH	Rorb	ChrimsonR_kv_eyfp_AAV	1	interneuron	2	224	200.385	Point 34	360.382	68.6492	187.105	no cnx
2019_04_05_exp1_TH	Rorb	ChrimsonR_kv_eyfp_AAV	1	interneuron	2	224	200.385	Point 5	366.268	-5.89645	174.755	no cnx
2019_04_05_exp1_TH	Rorb	ChrimsonR_kv_eyfp_AAV	1	interneuron	2	224	200.385	Point 4	344.559	-8.5866	174.755	no cnx
2019_04_05_exp1_TH	Rorb	ChrimsonR_kv_eyfp_AAV	1	interneuron	2	224	200.385	Point 7	355.93	-119.979	164.805	no cnx
2019_04_05_exp1_TH	Rorb	ChrimsonR_kv_eyfp_AAV	1	interneuron	2	224	200.385	Point 6	543.235	-22.5996	174.755	no cnx
2019_04_05_exp1_TH	Rorb	ChrimsonR_kv_eyfp_AAV	1	interneuron	2	224	200.385	Point 1	325.682	-67.0444	174.755	no cnx
2019_04_05_exp1_TH	Rorb	ChrimsonR_kv_eyfp_AAV	1	interneuron	2	224	200.385	Point 3	505.66	2.52035	174.755	no cnx
2019_04_05_exp1_TH	Rorb	ChrimsonR_kv_eyfp_AAV	1	interneuron	2	224	200.385	Point 2	380.123	71.3924	174.755	no cnx
2019_04_05_exp1_TH	Rorb	ChrimsonR_kv_eyfp_AAV	1	interneuron	2	224	200.385	Point 9	344.782	67.9168	164.805	no cnx
2019_04_05_exp1_TH	Rorb	ChrimsonR_kv_eyfp_AAV	1	interneuron	2	224	200.385	Point 8	534.487	29.5201	164.805	no cnx
2019_04_05_exp1_TH	Rorb	ChrimsonR_kv_eyfp_AAV	1	interneuron	2	224	200.385	Point 32	514.8	69.6975	187.105	no cnx
2019_04_05_exp1_TH	Rorb	ChrimsonR_kv_eyfp_AAV	1	interneuron	2	224	200.385	Point 48	383.145	157.004	165.675	no cnx
2019_04_05_exp1_TH	Rorb	ChrimsonR_kv_eyfp_AAV	1	interneuron	2	224	200.385	Point 49	545.634	224.097	165.675	no cnx
2019_04_05_exp1_TH	Rorb	ChrimsonR_kv_eyfp_AAV	1	interneuron	2	224	200.385	Point 42	523.807	44.4602	165.675	no cnx
2019_04_05_exp1_TH	Rorb	ChrimsonR_kv_eyfp_AAV	1	interneuron	2	224	200.385	Point 43	526.857	124.874	165.675	no cnx
2019_04_05_exp1_TH	Rorb	ChrimsonR_kv_eyfp_AAV	1	interneuron	2	224	200.385	Point 40	482.621	98.0251	175.045	no cnx
2019_04_05_exp1_TH	Rorb	ChrimsonR_kv_eyfp_AAV	1	interneuron	2	224	200.385	Point 41	575.023	112.242	175.045	no cnx
2019_04_05_exp1_TH	Rorb	ChrimsonR_kv_eyfp_AAV	1	interneuron	2	224	200.385	Point 46	511.791	156.174	165.675	no cnx
2019_04_05_exp1_TH	Rorb	ChrimsonR_kv_eyfp_AAV	1	interneuron	2	224	200.385	Point 47	504.571	240.976	165.675	no cnx
2019_04_05_exp1_TH	Rorb	ChrimsonR_kv_eyfp_AAV	1	interneuron	2	224	200.385	Point 44	576.875	188.799	165.675	no cnx
2019_04_05_exp1_TH	Rorb	ChrimsonR_kv_eyfp_AAV	1	interneuron	2	224	200.385	Point 45	536.314	113.733	165.675	no cnx
2019_04_05_exp1_TH	Rorb	ChrimsonR_kv_eyfp_AAV	1	interneuron	2	224	200.385	Point 28	549.6	45.4678	198.945	no cnx
2019_04_05_exp1_TH	Rorb	ChrimsonR_kv_eyfp_AAV	1	interneuron	2	224	200.385	Point 29	503.193	30.8431	198.945	no cnx
2019_04_05_exp1_TH	Rorb	ChrimsonR_kv_eyfp_AAV	1	interneuron	2	224	200.385	Point 20	414.412	92.3115	171.915	no cnx
2019_04_05_exp1_TH	Rorb	ChrimsonR_kv_eyfp_AAV	1	interneuron	2	224	200.385	Point 21	379.408	9.04719	171.915	no cnx
2019_04_05_exp1_TH	Rorb	ChrimsonR_kv_eyfp_AAV	1	interneuron	2	224	200.385	Point 22	501.263	154.723	171.915	no cnx
2019_04_05_exp1_TH	Rorb	ChrimsonR_kv_eyfp_AAV	1	interneuron	2	224	200.385	Point 23	522.416	206.149	171.915	no cnx
2019_04_05_exp1_TH	Rorb	ChrimsonR_kv_eyfp_AAV	1	interneuron	2	224	200.385	Point 24	485.352	140.306	198.945	no cnx
2019_04_05_exp1_TH	Rorb	ChrimsonR_kv_eyfp_AAV	1	interneuron	2	224	200.385	Point 25	549.394	29.2979	198.945	no cnx
2019_04_05_exp1_TH	Rorb	ChrimsonR_kv_eyfp_AAV	1	interneuron	2	224	200.385	Point 26	607.05	14.2574	198.945	no cnx
2019_04_05_exp1_TH	Rorb	ChrimsonR_kv_eyfp_AAV	1	interneuron	2	224	200.385	Point 27	501.326	117.232	198.945	no cnx
2019_04_05_exp1_TH	Rorb	ChrimsonR_kv_eyfp_AAV	1	interneuron	2	224	200.385	Point 39	583.415	123.583	175.045	no cnx
2019_04_05_exp1_TH	Rorb	ChrimsonR_kv_eyfp_AAV	1	interneuron	2	224	200.385	Point 33	499.709	-104.611	187.105	no cnx
2019_04_05_exp1_TH	Rorb	ChrimsonR_kv_eyfp_AAV	1	interneuron	2	224	200.385	Point 38	549.601	70.1532	175.045	no cnx
2019_03_20_exp1_TH	Rorb	ChrimsonR_kv_eyfp_AAV	1	interneuron	2	138	18.9249	Point 51	382.36	-54.114	22.805	no cnx
2019_03_20_exp1_TH	Rorb	ChrimsonR_kv_eyfp_AAV	1	interneuron	2	138	18.9249	Point 50	381.321	185.067	22.805	no cnx
2019_03_20_exp1_TH	Rorb	ChrimsonR_kv_eyfp_AAV	1	interneuron	2	138	18.9249	Point 53	358.612	71.7306	22.805	no cnx
2019_03_20_exp1_TH	Rorb	ChrimsonR_kv_eyfp_AAV	1	interneuron	2	138	18.9249	Point 52	200.493	64.7044	22.805	no cnx
2019_03_20_exp1_TH	Rorb	ChrimsonR_kv_eyfp_AAV	1	interneuron	2	138	18.9249	Point 11	243.982	-48.7859	34.585	no cnx
2019_03_20_exp1_TH	Rorb	ChrimsonR_kv_eyfp_AAV	1	interneuron	2	138	18.9249	Point 10	388.9	-40.0981	34.585	excitatory	0.396807
2019_03_20_exp1_TH	Rorb	ChrimsonR_kv_eyfp_AAV	1	interneuron	2	138	18.9249	Point 13	241.092	35.4589	34.585	no cnx
2019_03_20_exp1_TH	Rorb	ChrimsonR_kv_eyfp_AAV	1	interneuron	2	138	18.9249	Point 12	319.905	-0.248055	34.585	excitatory	0.620399
2019_03_20_exp1_TH	Rorb	ChrimsonR_kv_eyfp_AAV	1	interneuron	2	138	18.9249	Point 15	275.118	78.1615	34.585	no cnx
2019_03_20_exp1_TH	Rorb	ChrimsonR_kv_eyfp_AAV	1	interneuron	2	138	18.9249	Point 14	369.484	69.386	34.585	excitatory	0.60277
2019_03_20_exp1_TH	Rorb	ChrimsonR_kv_eyfp_AAV	1	interneuron	2	138	18.9249	Point 17	251.749	-12.4362	34.585	excitatory	0.338134
2019_03_20_exp1_TH	Rorb	ChrimsonR_kv_eyfp_AAV	1	interneuron	2	138	18.9249	Point 16	439.337	-15.1619	34.585	no cnx
2019_03_20_exp1_TH	Rorb	ChrimsonR_kv_eyfp_AAV	1	interneuron	2	138	18.9249	Point 19	270.342	-75.403	37.675	no cnx
2019_03_20_exp1_TH	Rorb	ChrimsonR_kv_eyfp_AAV	1	interneuron	2	138	18.9249	Point 18	390.119	-1.75363	34.585	no cnx
2019_03_20_exp1_TH	Rorb	ChrimsonR_kv_eyfp_AAV	1	interneuron	2	138	18.9249	Point 31	207.805	70.9957	25.795	no cnx
2019_03_20_exp1_TH	Rorb	ChrimsonR_kv_eyfp_AAV	1	interneuron	2	138	18.9249	Point 30	340.906	100.392	25.795	no cnx
2019_03_20_exp1_TH	Rorb	ChrimsonR_kv_eyfp_AAV	1	interneuron	2	138	18.9249	Point 37	363.591	-83.4747	27.295	no cnx
2019_03_20_exp1_TH	Rorb	ChrimsonR_kv_eyfp_AAV	1	interneuron	2	138	18.9249	Point 36	229.876	95.1849	27.295	no cnx
2019_03_20_exp1_TH	Rorb	ChrimsonR_kv_eyfp_AAV	1	interneuron	2	138	18.9249	Point 35	439.832	96.9394	27.295	no cnx
2019_03_20_exp1_TH	Rorb	ChrimsonR_kv_eyfp_AAV	1	interneuron	2	138	18.9249	Point 34	323.319	40.9088	27.295	no cnx
2019_03_20_exp1_TH	Rorb	ChrimsonR_kv_eyfp_AAV	1	interneuron	2	138	18.9249	Point 5	279.829	64.5594	34.585	no cnx
2019_03_20_exp1_TH	Rorb	ChrimsonR_kv_eyfp_AAV	1	interneuron	2	138	18.9249	Point 4	229.717	-70.9321	34.585	no cnx
2019_03_20_exp1_TH	Rorb	ChrimsonR_kv_eyfp_AAV	1	interneuron	2	138	18.9249	Point 7	214.949	87.2254	34.585	no cnx
2019_03_20_exp1_TH	Rorb	ChrimsonR_kv_eyfp_AAV	1	interneuron	2	138	18.9249	Point 6	213.965	103.374	34.585	no cnx
2019_03_20_exp1_TH	Rorb	ChrimsonR_kv_eyfp_AAV	1	interneuron	2	138	18.9249	Point 1	200.354	49.8578	34.585	no cnx
2019_03_20_exp1_TH	Rorb	ChrimsonR_kv_eyfp_AAV	1	interneuron	2	138	18.9249	Point 3	325.75	-83.4793	34.585	no cnx
2019_03_20_exp1_TH	Rorb	ChrimsonR_kv_eyfp_AAV	1	interneuron	2	138	18.9249	Point 2	281.173	-37.0557	34.585	no cnx
2019_03_20_exp1_TH	Rorb	ChrimsonR_kv_eyfp_AAV	1	interneuron	2	138	18.9249	Point 9	328.723	89.4222	34.585	no cnx
2019_03_20_exp1_TH	Rorb	ChrimsonR_kv_eyfp_AAV	1	interneuron	2	138	18.9249	Point 8	266.928	97.8351	34.585	no cnx
2019_03_20_exp1_TH	Rorb	ChrimsonR_kv_eyfp_AAV	1	interneuron	2	138	18.9249	Point 32	395.451	-34.515	25.795	no cnx
2019_03_20_exp1_TH	Rorb	ChrimsonR_kv_eyfp_AAV	1	interneuron	2	138	18.9249	Point 48	264.007	-40.4708	22.805	no cnx
2019_03_20_exp1_TH	Rorb	ChrimsonR_kv_eyfp_AAV	1	interneuron	2	138	18.9249	Point 49	364.871	13.2885	22.805	no cnx
2019_03_20_exp1_TH	Rorb	ChrimsonR_kv_eyfp_AAV	1	interneuron	2	138	18.9249	Point 42	294.451	24.3423	27.295	no cnx
2019_03_20_exp1_TH	Rorb	ChrimsonR_kv_eyfp_AAV	1	interneuron	2	138	18.9249	Point 43	220.315	-73.4554	27.295	no cnx
2019_03_20_exp1_TH	Rorb	ChrimsonR_kv_eyfp_AAV	1	interneuron	2	138	18.9249	Point 40	252.87	122.128	27.295	no cnx
2019_03_20_exp1_TH	Rorb	ChrimsonR_kv_eyfp_AAV	1	interneuron	2	138	18.9249	Point 41	213.407	92.3971	27.295	no cnx
2019_03_20_exp1_TH	Rorb	ChrimsonR_kv_eyfp_AAV	1	interneuron	2	138	18.9249	Point 46	359.733	96.0766	27.295	excitatory	0.339226
2019_03_20_exp1_TH	Rorb	ChrimsonR_kv_eyfp_AAV	1	interneuron	2	138	18.9249	Point 47	178.009	123.197	22.805	no cnx
2019_03_20_exp1_TH	Rorb	ChrimsonR_kv_eyfp_AAV	1	interneuron	2	138	18.9249	Point 44	319.016	-55.7203	27.295	no cnx
2019_03_20_exp1_TH	Rorb	ChrimsonR_kv_eyfp_AAV	1	interneuron	2	138	18.9249	Point 45	396.858	-68.7786	27.295	excitatory	0.714188
2019_03_20_exp1_TH	Rorb	ChrimsonR_kv_eyfp_AAV	1	interneuron	2	138	18.9249	Point 28	374.637	45.865	25.795	no cnx
2019_03_20_exp1_TH	Rorb	ChrimsonR_kv_eyfp_AAV	1	interneuron	2	138	18.9249	Point 29	261.907	160.754	25.795	no cnx
2019_03_20_exp1_TH	Rorb	ChrimsonR_kv_eyfp_AAV	1	interneuron	2	138	18.9249	Point 20	354.952	-17.2467	37.675	no cnx
2019_03_20_exp1_TH	Rorb	ChrimsonR_kv_eyfp_AAV	1	interneuron	2	138	18.9249	Point 21	402.128	-47.7912	37.675	no cnx
2019_03_20_exp1_TH	Rorb	ChrimsonR_kv_eyfp_AAV	1	interneuron	2	138	18.9249	Point 22	243.697	154.811	37.675	no cnx
2019_03_20_exp1_TH	Rorb	ChrimsonR_kv_eyfp_AAV	1	interneuron	2	138	18.9249	Point 23	265.252	-65.9301	37.675	no cnx
2019_03_20_exp1_TH	Rorb	ChrimsonR_kv_eyfp_AAV	1	interneuron	2	138	18.9249	Point 24	418.138	4.38067	37.685	no cnx
2019_03_20_exp1_TH	Rorb	ChrimsonR_kv_eyfp_AAV	1	interneuron	2	138	18.9249	Point 25	265.837	37.44	37.685	no cnx
2019_03_20_exp1_TH	Rorb	ChrimsonR_kv_eyfp_AAV	1	interneuron	2	138	18.9249	Point 26	207.765	5.14308	25.795	no cnx
2019_03_20_exp1_TH	Rorb	ChrimsonR_kv_eyfp_AAV	1	interneuron	2	138	18.9249	Point 27	256.126	25.6258	25.795	no cnx
2019_03_20_exp1_TH	Rorb	ChrimsonR_kv_eyfp_AAV	1	interneuron	2	138	18.9249	Point 33	234.654	53.1072	27.295	no cnx
2019_03_20_exp1_TH	Rorb	ChrimsonR_kv_eyfp_AAV	1	interneuron	2	138	18.9249	Point 38	251.209	38.7833	27.295	no cnx
2019_02_28_exp1_TH	Tlx3	ChrimsonR_kv_eyfp_AAV	1	interneuron	2	209	292.019	Point 11	530.862	-54.9789	320.139	no cnx
2019_02_28_exp1_TH	Tlx3	ChrimsonR_kv_eyfp_AAV	1	interneuron	2	209	292.019	Point 10	507.569	102.056	329.809	no cnx
2019_02_28_exp1_TH	Tlx3	ChrimsonR_kv_eyfp_AAV	1	interneuron	2	209	292.019	Point 13	520.454	25.1235	320.139	no cnx
2019_02_28_exp1_TH	Tlx3	ChrimsonR_kv_eyfp_AAV	1	interneuron	2	209	292.019	Point 12	622.149	37.0371	320.139	excitatory	0.158908
2019_02_28_exp1_TH	Tlx3	ChrimsonR_kv_eyfp_AAV	1	interneuron	2	209	292.019	Point 15	524.675	116.765	320.139	no cnx
2019_02_28_exp1_TH	Tlx3	ChrimsonR_kv_eyfp_AAV	1	interneuron	2	209	292.019	Point 14	475.614	40.2496	320.139	no cnx
2019_02_28_exp1_TH	Tlx3	ChrimsonR_kv_eyfp_AAV	1	interneuron	2	209	292.019	Point 17	505.508	62.8324	322.519	no cnx
2019_02_28_exp1_TH	Tlx3	ChrimsonR_kv_eyfp_AAV	1	interneuron	2	209	292.019	Point 16	677.766	46.1584	320.139	no cnx
2019_02_28_exp1_TH	Tlx3	ChrimsonR_kv_eyfp_AAV	1	interneuron	2	209	292.019	Point 19	522.2	146.262	322.519	no cnx
2019_02_28_exp1_TH	Tlx3	ChrimsonR_kv_eyfp_AAV	1	interneuron	2	209	292.019	Point 18	572.465	30.9367	322.519	no cnx
2019_02_28_exp1_TH	Tlx3	ChrimsonR_kv_eyfp_AAV	1	interneuron	2	209	292.019	Point 31	545.64	140.115	312.419	no cnx
2019_02_28_exp1_TH	Tlx3	ChrimsonR_kv_eyfp_AAV	1	interneuron	2	209	292.019	Point 30	490.458	104.112	312.419	no cnx
2019_02_28_exp1_TH	Tlx3	ChrimsonR_kv_eyfp_AAV	1	interneuron	2	209	292.019	Point 37	460.168	49.0171	301.389	no cnx
2019_02_28_exp1_TH	Tlx3	ChrimsonR_kv_eyfp_AAV	1	interneuron	2	209	292.019	Point 36	466.659	-22.69	301.389	excitatory	0.158877
2019_02_28_exp1_TH	Tlx3	ChrimsonR_kv_eyfp_AAV	1	interneuron	2	209	292.019	Point 35	456.451	130.379	314.899	no cnx
2019_02_28_exp1_TH	Tlx3	ChrimsonR_kv_eyfp_AAV	1	interneuron	2	209	292.019	Point 34	551.691	124.614	314.899	no cnx
2019_02_28_exp1_TH	Tlx3	ChrimsonR_kv_eyfp_AAV	1	interneuron	2	209	292.019	Point 5	476.713	-39.0974	327.749	no cnx
2019_02_28_exp1_TH	Tlx3	ChrimsonR_kv_eyfp_AAV	1	interneuron	2	209	292.019	Point 4	536.202	120.176	327.749	no cnx
2019_02_28_exp1_TH	Tlx3	ChrimsonR_kv_eyfp_AAV	1	interneuron	2	209	292.019	Point 7	540.828	-14.7844	329.809	no cnx
2019_02_28_exp1_TH	Tlx3	ChrimsonR_kv_eyfp_AAV	1	interneuron	2	209	292.019	Point 6	584.175	61.2088	327.749	no cnx
2019_02_28_exp1_TH	Tlx3	ChrimsonR_kv_eyfp_AAV	1	interneuron	2	209	292.019	Point 1	465.053	21.196	327.749	no cnx
2019_02_28_exp1_TH	Tlx3	ChrimsonR_kv_eyfp_AAV	1	interneuron	2	209	292.019	Point 3	480.756	-6.18607	327.749	no cnx
2019_02_28_exp1_TH	Tlx3	ChrimsonR_kv_eyfp_AAV	1	interneuron	2	209	292.019	Point 2	560.264	93.8207	327.749	no cnx
2019_02_28_exp1_TH	Tlx3	ChrimsonR_kv_eyfp_AAV	1	interneuron	2	209	292.019	Point 9	544.989	49.3409	329.809	no cnx
2019_02_28_exp1_TH	Tlx3	ChrimsonR_kv_eyfp_AAV	1	interneuron	2	209	292.019	Point 8	500.068	-4.88835	329.809	no cnx
2019_02_28_exp1_TH	Tlx3	ChrimsonR_kv_eyfp_AAV	1	interneuron	2	209	292.019	Point 32	475.342	63.8579	312.419	no cnx
2019_02_28_exp1_TH	Tlx3	ChrimsonR_kv_eyfp_AAV	1	interneuron	2	209	292.019	Point 42	465.927	243.144	361.679	no cnx
2019_02_28_exp1_TH	Tlx3	ChrimsonR_kv_eyfp_AAV	1	interneuron	2	209	292.019	Point 43	470.306	317.386	361.679	no cnx
2019_02_28_exp1_TH	Tlx3	ChrimsonR_kv_eyfp_AAV	1	interneuron	2	209	292.019	Point 40	561.525	17.1909	301.389	no cnx
2019_02_28_exp1_TH	Tlx3	ChrimsonR_kv_eyfp_AAV	1	interneuron	2	209	292.019	Point 41	661.735	59.8696	301.389	no cnx
2019_02_28_exp1_TH	Tlx3	ChrimsonR_kv_eyfp_AAV	1	interneuron	2	209	292.019	Point 44	511.395	405.479	361.679	no cnx
2019_02_28_exp1_TH	Tlx3	ChrimsonR_kv_eyfp_AAV	1	interneuron	2	209	292.019	Point 45	460.587	384.75	361.679	no cnx
2019_02_28_exp1_TH	Tlx3	ChrimsonR_kv_eyfp_AAV	1	interneuron	2	209	292.019	Point 28	671.539	-40.427	312.419	no cnx
2019_02_28_exp1_TH	Tlx3	ChrimsonR_kv_eyfp_AAV	1	interneuron	2	209	292.019	Point 29	465.83	-59.3807	312.419	no cnx
2019_02_28_exp1_TH	Tlx3	ChrimsonR_kv_eyfp_AAV	1	interneuron	2	209	292.019	Point 20	498.418	176.582	322.519	no cnx
2019_02_28_exp1_TH	Tlx3	ChrimsonR_kv_eyfp_AAV	1	interneuron	2	209	292.019	Point 21	622.63	49.8489	312.419	excitatory	0.742536
2019_02_28_exp1_TH	Tlx3	ChrimsonR_kv_eyfp_AAV	1	interneuron	2	209	292.019	Point 22	504.906	-32.2318	312.419	no cnx
2019_02_28_exp1_TH	Tlx3	ChrimsonR_kv_eyfp_AAV	1	interneuron	2	209	292.019	Point 23	528.95	154.686	312.419	no cnx
2019_02_28_exp1_TH	Tlx3	ChrimsonR_kv_eyfp_AAV	1	interneuron	2	209	292.019	Point 24	617.794	-32.1253	312.419	no cnx
2019_02_28_exp1_TH	Tlx3	ChrimsonR_kv_eyfp_AAV	1	interneuron	2	209	292.019	Point 25	524.39	-27.5471	312.419	no cnx
2019_02_28_exp1_TH	Tlx3	ChrimsonR_kv_eyfp_AAV	1	interneuron	2	209	292.019	Point 26	522.311	54.7244	312.419	no cnx
2019_02_28_exp1_TH	Tlx3	ChrimsonR_kv_eyfp_AAV	1	interneuron	2	209	292.019	Point 27	622.581	59.5855	312.419	excitatory	0.340466
2019_02_28_exp1_TH	Tlx3	ChrimsonR_kv_eyfp_AAV	1	interneuron	2	209	292.019	Point 39	458.131	159.837	301.389	no cnx
2019_02_28_exp1_TH	Tlx3	ChrimsonR_kv_eyfp_AAV	1	interneuron	2	209	292.019	Point 33	494.345	126.941	314.899	excitatory	0.439667
2019_02_28_exp1_TH	Tlx3	ChrimsonR_kv_eyfp_AAV	1	interneuron	2	209	292.019	Point 38	444.332	102.608	301.389	no cnx
2019_02_15_exp1_TH	Tlx3	ChrimsonR_kv_eyfp_AAV	1	interneuron	2	231	656.916	Point 11	476.157	272.352	657.416	no cnx
2019_02_15_exp1_TH	Tlx3	ChrimsonR_kv_eyfp_AAV	1	interneuron	2	231	656.916	Point 10	648.256	261.382	657.416	no cnx
2019_02_15_exp1_TH	Tlx3	ChrimsonR_kv_eyfp_AAV	1	interneuron	2	231	656.916	Point 13	566.612	154.129	657.416	no cnx
2019_02_15_exp1_TH	Tlx3	ChrimsonR_kv_eyfp_AAV	1	interneuron	2	231	656.916	Point 12	585.735	263.651	657.416	no cnx
2019_02_15_exp1_TH	Tlx3	ChrimsonR_kv_eyfp_AAV	1	interneuron	2	231	656.916	Point 15	554.821	170.893	655.596	no cnx
2019_02_15_exp1_TH	Tlx3	ChrimsonR_kv_eyfp_AAV	1	interneuron	2	231	656.916	Point 14	584.648	47.9819	655.596	no cnx
2019_02_15_exp1_TH	Tlx3	ChrimsonR_kv_eyfp_AAV	1	interneuron	2	231	656.916	Point 17	507.695	235.998	655.596	no cnx
2019_02_15_exp1_TH	Tlx3	ChrimsonR_kv_eyfp_AAV	1	interneuron	2	231	656.916	Point 16	571.296	77.0047	655.596	no cnx
2019_02_15_exp1_TH	Tlx3	ChrimsonR_kv_eyfp_AAV	1	interneuron	2	231	656.916	Point 19	590.803	93.7378	660.706	no cnx
2019_02_15_exp1_TH	Tlx3	ChrimsonR_kv_eyfp_AAV	1	interneuron	2	231	656.916	Point 18	527.037	118.501	660.706	no cnx
2019_02_15_exp1_TH	Tlx3	ChrimsonR_kv_eyfp_AAV	1	interneuron	2	231	656.916	Point 31	502.553	198.913	653.036	no cnx
2019_02_15_exp1_TH	Tlx3	ChrimsonR_kv_eyfp_AAV	1	interneuron	2	231	656.916	Point 30	415.817	203.02	653.036	no cnx
2019_02_15_exp1_TH	Tlx3	ChrimsonR_kv_eyfp_AAV	1	interneuron	2	231	656.916	Point 5	465.153	195.093	652.626	no cnx
2019_02_15_exp1_TH	Tlx3	ChrimsonR_kv_eyfp_AAV	1	interneuron	2	231	656.916	Point 4	589.967	219.352	652.626	no cnx
2019_02_15_exp1_TH	Tlx3	ChrimsonR_kv_eyfp_AAV	1	interneuron	2	231	656.916	Point 7	518.377	33.2649	657.416	no cnx
2019_02_15_exp1_TH	Tlx3	ChrimsonR_kv_eyfp_AAV	1	interneuron	2	231	656.916	Point 6	532.711	103.292	652.626	no cnx
2019_02_15_exp1_TH	Tlx3	ChrimsonR_kv_eyfp_AAV	1	interneuron	2	231	656.916	Point 1	589.317	3.75842	652.626	no cnx
2019_02_15_exp1_TH	Tlx3	ChrimsonR_kv_eyfp_AAV	1	interneuron	2	231	656.916	Point 3	490.73	217.293	652.626	no cnx
2019_02_15_exp1_TH	Tlx3	ChrimsonR_kv_eyfp_AAV	1	interneuron	2	231	656.916	Point 2	518.452	156.36	652.626	no cnx
2019_02_15_exp1_TH	Tlx3	ChrimsonR_kv_eyfp_AAV	1	interneuron	2	231	656.916	Point 9	482.497	160.376	657.416	no cnx
2019_02_15_exp1_TH	Tlx3	ChrimsonR_kv_eyfp_AAV	1	interneuron	2	231	656.916	Point 8	467.927	249.622	657.416	no cnx
2019_02_15_exp1_TH	Tlx3	ChrimsonR_kv_eyfp_AAV	1	interneuron	2	231	656.916	Point 29	485.631	143.937	653.036	no cnx
2019_02_15_exp1_TH	Tlx3	ChrimsonR_kv_eyfp_AAV	1	interneuron	2	231	656.916	Point 20	455.617	168.762	660.706	no cnx
2019_02_15_exp1_TH	Tlx3	ChrimsonR_kv_eyfp_AAV	1	interneuron	2	231	656.916	Point 21	578.04	230.958	660.706	no cnx
2019_02_15_exp1_TH	Tlx3	ChrimsonR_kv_eyfp_AAV	1	interneuron	2	231	656.916	Point 22	480.083	174.618	653.036	no cnx
2019_02_15_exp1_TH	Tlx3	ChrimsonR_kv_eyfp_AAV	1	interneuron	2	231	656.916	Point 23	574.849	118.516	653.036	no cnx
2019_02_15_exp1_TH	Tlx3	ChrimsonR_kv_eyfp_AAV	1	interneuron	2	231	656.916	Point 24	521.085	263.232	653.036	no cnx
2019_02_15_exp1_TH	Tlx3	ChrimsonR_kv_eyfp_AAV	1	interneuron	2	231	656.916	Point 25	506.125	186.945	653.036	no cnx
2019_02_15_exp1_TH	Tlx3	ChrimsonR_kv_eyfp_AAV	1	interneuron	2	231	656.916	Point 26	447.224	246.489	653.036	no cnx
2019_02_15_exp1_TH	Tlx3	ChrimsonR_kv_eyfp_AAV	1	interneuron	2	231	656.916	Point 27	540.654	231.436	653.036	no cnx
2019_01_24_exp1_TH	Rorb	Ai167	0	interneuron	2	266	463.217	Point 50	302.026	80.6667	468.826	no cnx
2019_01_24_exp1_TH	Rorb	Ai167	0	interneuron	2	266	463.217	Point 11	461.733	166.362	437.746	no cnx
2019_01_24_exp1_TH	Rorb	Ai167	0	interneuron	2	266	463.217	Point 10	525.528	6.52969	437.746	no cnx
2019_01_24_exp1_TH	Rorb	Ai167	0	interneuron	2	266	463.217	Point 13	332.409	52.6243	437.756	no cnx
2019_01_24_exp1_TH	Rorb	Ai167	0	interneuron	2	266	463.217	Point 12	499.744	-17.7929	437.746	no cnx
2019_01_24_exp1_TH	Rorb	Ai167	0	interneuron	2	266	463.217	Point 15	594.627	218.944	488.766	no cnx
2019_01_24_exp1_TH	Rorb	Ai167	0	interneuron	2	266	463.217	Point 14	419.065	162.13	410.576	no cnx
2019_01_24_exp1_TH	Rorb	Ai167	0	interneuron	2	266	463.217	Point 17	705.509	-6.49121	481.066	no cnx
2019_01_24_exp1_TH	Rorb	Ai167	0	interneuron	2	266	463.217	Point 16	466.485	-69.6611	481.066	no cnx
2019_01_24_exp1_TH	Rorb	Ai167	0	interneuron	2	266	463.217	Point 19	451.249	29.8244	476.576	no cnx
2019_01_24_exp1_TH	Rorb	Ai167	0	interneuron	2	266	463.217	Point 18	498.506	-48.1313	481.066	no cnx
2019_01_24_exp1_TH	Rorb	Ai167	0	interneuron	2	266	463.217	Point 31	590.779	237.521	473.916	no cnx
2019_01_24_exp1_TH	Rorb	Ai167	0	interneuron	2	266	463.217	Point 30	464.6	267.961	473.916	no cnx
2019_01_24_exp1_TH	Rorb	Ai167	0	interneuron	2	266	463.217	Point 37	596.538	78.2638	425.726	no cnx
2019_01_24_exp1_TH	Rorb	Ai167	0	interneuron	2	266	463.217	Point 36	623.57	34.1394	425.726	no cnx
2019_01_24_exp1_TH	Rorb	Ai167	0	interneuron	2	266	463.217	Point 35	622.585	160.291	487.386	no cnx
2019_01_24_exp1_TH	Rorb	Ai167	0	interneuron	2	266	463.217	Point 34	470.853	353.301	473.916	no cnx
2019_01_24_exp1_TH	Rorb	Ai167	0	interneuron	2	266	463.217	Point 5	385.654	88.8049	459.056	excitatory	0.632008
2019_01_24_exp1_TH	Rorb	Ai167	0	interneuron	2	266	463.217	Point 4	416.91	178.937	466.796	no cnx
2019_01_24_exp1_TH	Rorb	Ai167	0	interneuron	2	266	463.217	Point 7	488.979	124.245	459.056	no cnx
2019_01_24_exp1_TH	Rorb	Ai167	0	interneuron	2	266	463.217	Point 6	425.097	32.6696	459.056	no cnx
2019_01_24_exp1_TH	Rorb	Ai167	0	interneuron	2	266	463.217	Point 1	439.407	231.672	481.636	no cnx
2019_01_24_exp1_TH	Rorb	Ai167	0	interneuron	2	266	463.217	Point 3	462.149	27.0005	466.796	no cnx
2019_01_24_exp1_TH	Rorb	Ai167	0	interneuron	2	266	463.217	Point 2	414.322	-33.2483	466.796	no cnx
2019_01_24_exp1_TH	Rorb	Ai167	0	interneuron	2	266	463.217	Point 9	429.268	-29.3022	437.746	no cnx
2019_01_24_exp1_TH	Rorb	Ai167	0	interneuron	2	266	463.217	Point 8	321.666	83.657	453.286	no cnx
2019_01_24_exp1_TH	Rorb	Ai167	0	interneuron	2	266	463.217	Point 32	427.627	311.353	473.916	no cnx
2019_01_24_exp1_TH	Rorb	Ai167	0	interneuron	2	266	463.217	Point 48	381.115	409.841	452.346	no cnx
2019_01_24_exp1_TH	Rorb	Ai167	0	interneuron	2	266	463.217	Point 49	429.817	477.31	452.346	excitatory	0.731096
2019_01_24_exp1_TH	Rorb	Ai167	0	interneuron	2	266	463.217	Point 42	354.476	299.118	483.016	no cnx
2019_01_24_exp1_TH	Rorb	Ai167	0	interneuron	2	266	463.217	Point 43	420.692	366.895	483.016	excitatory	0.040055
2019_01_24_exp1_TH	Rorb	Ai167	0	interneuron	2	266	463.217	Point 40	402.049	258.442	467.606	no cnx
2019_01_24_exp1_TH	Rorb	Ai167	0	interneuron	2	266	463.217	Point 41	392.132	304.808	467.606	no cnx
2019_01_24_exp1_TH	Rorb	Ai167	0	interneuron	2	266	463.217	Point 46	430.03	450.159	452.346	no cnx
2019_01_24_exp1_TH	Rorb	Ai167	0	interneuron	2	266	463.217	Point 47	335.687	413.344	452.346	no cnx
2019_01_24_exp1_TH	Rorb	Ai167	0	interneuron	2	266	463.217	Point 44	318.178	332.249	483.016	no cnx
2019_01_24_exp1_TH	Rorb	Ai167	0	interneuron	2	266	463.217	Point 45	424.523	412.962	483.016	no cnx
2019_01_24_exp1_TH	Rorb	Ai167	0	interneuron	2	266	463.217	Point 28	563.861	40.5653	437.646	no cnx
2019_01_24_exp1_TH	Rorb	Ai167	0	interneuron	2	266	463.217	Point 29	582.77	280.193	473.916	no cnx
2019_01_24_exp1_TH	Rorb	Ai167	0	interneuron	2	266	463.217	Point 20	686.071	33.1984	476.576	no cnx
2019_01_24_exp1_TH	Rorb	Ai167	0	interneuron	2	266	463.217	Point 21	381.765	-72.9754	477.096	no cnx
2019_01_24_exp1_TH	Rorb	Ai167	0	interneuron	2	266	463.217	Point 22	380.263	-28.2058	477.096	no cnx
2019_01_24_exp1_TH	Rorb	Ai167	0	interneuron	2	266	463.217	Point 23	435.559	-262.308	461.616	no cnx
2019_01_24_exp1_TH	Rorb	Ai167	0	interneuron	2	266	463.217	Point 24	456.714	-175.384	461.616	no cnx
2019_01_24_exp1_TH	Rorb	Ai167	0	interneuron	2	266	463.217	Point 25	439.575	-283.866	448.956	no cnx
2019_01_24_exp1_TH	Rorb	Ai167	0	interneuron	2	266	463.217	Point 26	451.486	-178.11	448.956	no cnx
2019_01_24_exp1_TH	Rorb	Ai167	0	interneuron	2	266	463.217	Point 27	502.59	50.1697	437.646	no cnx
2019_01_24_exp1_TH	Rorb	Ai167	0	interneuron	2	266	463.217	Point 39	374.873	259.484	425.736	no cnx
2019_01_24_exp1_TH	Rorb	Ai167	0	interneuron	2	266	463.217	Point 33	650.002	301.146	473.916	no cnx
2019_01_24_exp1_TH	Rorb	Ai167	0	interneuron	2	266	463.217	Point 38	410.029	163.788	425.736	no cnx
2018_11_30_exp2_TH	Rorb	Ai167	2	interneuron	2	185	743.596	Point 11	470.944	205.739	730.776	no cnx
2018_11_30_exp2_TH	Rorb	Ai167	2	interneuron	2	185	743.596	Point 10	411.825	228.081	730.776	no cnx
2018_11_30_exp2_TH	Rorb	Ai167	2	interneuron	2	185	743.596	Point 12	277.911	230.14	730.776	no cnx
2018_11_30_exp2_TH	Rorb	Ai167	2	interneuron	2	185	743.596	Point 17	517.902	-69.0656	790.896	no cnx
2018_11_30_exp2_TH	Rorb	Ai167	2	interneuron	2	185	743.596	Point 16	403.499	-45.7871	790.896	excitatory	1.10343
2018_11_30_exp2_TH	Rorb	Ai167	2	interneuron	2	185	743.596	Point 19	475.968	-90.5923	790.896	no cnx
2018_11_30_exp2_TH	Rorb	Ai167	2	interneuron	2	185	743.596	Point 18	609.508	48.6478	790.896	no cnx
2018_11_30_exp2_TH	Rorb	Ai167	2	interneuron	2	185	743.596	Point 31	270.467	-14.2685	758.806	no cnx
2018_11_30_exp2_TH	Rorb	Ai167	2	interneuron	2	185	743.596	Point 35	285.43	-157.955	758.806	no cnx
2018_11_30_exp2_TH	Rorb	Ai167	2	interneuron	2	185	743.596	Point 34	416.507	92.1951	758.806	no cnx
2018_11_30_exp2_TH	Rorb	Ai167	2	interneuron	2	185	743.596	Point 5	425.298	98.5449	748.496	excitatory	0.959597
2018_11_30_exp2_TH	Rorb	Ai167	2	interneuron	2	185	743.596	Point 4	438.359	261.764	745.406	no cnx
2018_11_30_exp2_TH	Rorb	Ai167	2	interneuron	2	185	743.596	Point 7	290.444	120.529	739.646	no cnx
2018_11_30_exp2_TH	Rorb	Ai167	2	interneuron	2	185	743.596	Point 6	440.795	102.449	739.646	no cnx
2018_11_30_exp2_TH	Rorb	Ai167	2	interneuron	2	185	743.596	Point 1	308.974	271.046	769.256	no cnx
2018_11_30_exp2_TH	Rorb	Ai167	2	interneuron	2	185	743.596	Point 3	257.578	85.7595	753.266	no cnx
2018_11_30_exp2_TH	Rorb	Ai167	2	interneuron	2	185	743.596	Point 2	418.017	158.354	769.256	no cnx
2018_11_30_exp2_TH	Rorb	Ai167	2	interneuron	2	185	743.596	Point 9	291.869	46.5768	739.646	no cnx
2018_11_30_exp2_TH	Rorb	Ai167	2	interneuron	2	185	743.596	Point 8	436.175	261.585	739.646	no cnx
2018_11_30_exp2_TH	Rorb	Ai167	2	interneuron	2	185	743.596	Point 32	324.8	-168.526	758.806	no cnx
2018_11_30_exp2_TH	Rorb	Ai167	2	interneuron	2	185	743.596	Point 28	581.126	-80.6676	849.606	no cnx
2018_11_30_exp2_TH	Rorb	Ai167	2	interneuron	2	185	743.596	Point 29	650.462	0.794879	849.606	no cnx
2018_11_30_exp2_TH	Rorb	Ai167	2	interneuron	2	185	743.596	Point 20	403.855	-142.695	790.896	no cnx
2018_11_30_exp2_TH	Rorb	Ai167	2	interneuron	2	185	743.596	Point 21	703.986	-92.8641	839.526	no cnx
2018_11_30_exp2_TH	Rorb	Ai167	2	interneuron	2	185	743.596	Point 22	610.398	-128.844	839.526	no cnx
2018_11_30_exp2_TH	Rorb	Ai167	2	interneuron	2	185	743.596	Point 23	681.942	-22.6453	813.766	no cnx
2018_11_30_exp2_TH	Rorb	Ai167	2	interneuron	2	185	743.596	Point 24	600.536	97.0601	813.766	no cnx	0.133112
2018_11_30_exp2_TH	Rorb	Ai167	2	interneuron	2	185	743.596	Point 25	511.299	-28.6719	849.606	no cnx
2018_11_30_exp2_TH	Rorb	Ai167	2	interneuron	2	185	743.596	Point 26	622.053	20.2851	849.606	no cnx
2018_11_30_exp2_TH	Rorb	Ai167	2	interneuron	2	185	743.596	Point 27	488.74	36.2522	849.606	no cnx
2018_11_30_exp2_TH	Rorb	Ai167	2	interneuron	2	185	743.596	Point 33	246.846	80.7185	758.806	no cnx
2018_04_23_exp3_AB	Rorb	Ai167	1	interneuron	2	201	86.484	TSeries_493_3	309.075	-139.451	54.684	no cnx
2018_04_23_exp3_AB	Rorb	Ai167	1	interneuron	2	201	86.484	TSeries_643_5	252.298	-116.329	48.004	no cnx
2018_04_23_exp3_AB	Rorb	Ai167	1	interneuron	2	201	86.484	TSeries_643_2	303.614	-200.361	48.004	no cnx
2018_04_23_exp3_AB	Rorb	Ai167	1	interneuron	2	201	86.484	TSeries_643_1	321.117	-211.835	48.004	no cnx
2018_04_23_exp3_AB	Rorb	Ai167	1	interneuron	2	201	86.484	TSeries_393_3	369.834	-173.6	90.724	no cnx
2018_04_23_exp3_AB	Rorb	Ai167	1	interneuron	2	201	86.484	TSeries_473_1	311.941	-176.719	78.014	no cnx
2018_04_23_exp3_AB	Rorb	Ai167	1	interneuron	2	201	86.484	TSeries_113_4	301.483	-90.2004	99.884	no cnx	0.88125
2018_04_23_exp3_AB	Rorb	Ai167	1	interneuron	2	201	86.484	TSeries_113_3	325.005	-110.331	99.884	no cnx
2018_04_23_exp3_AB	Rorb	Ai167	1	interneuron	2	201	86.484	TSeries_113_2	282.17	-64.1993	99.884	excitatory
2018_04_23_exp3_AB	Rorb	Ai167	1	interneuron	2	201	86.484	TSeries_113_1	414.929	-48.6229	99.884	no cnx
2018_04_23_exp3_AB	Rorb	Ai167	1	interneuron	2	201	86.484	TSeries_523_1	204.438	-69.4992	115.044	no cnx
2018_04_23_exp3_AB	Rorb	Ai167	1	interneuron	2	201	86.484	TSeries_353_1	181.175	14.2274	114.004	no cnx
2018_04_23_exp3_AB	Rorb	Ai167	1	interneuron	2	201	86.484	TSeries_353_2	255.977	-64.53	114.004	no cnx
2018_04_23_exp3_AB	Rorb	Ai167	1	interneuron	2	201	86.484	TSeries_303_4	345.581	-107.295	90.544	no cnx
2018_04_23_exp3_AB	Rorb	Ai167	1	interneuron	2	201	86.484	TSeries_303_2	235.24	-32.0459	90.544	no cnx
2018_04_23_exp3_AB	Rorb	Ai167	1	interneuron	2	201	86.484	TSeries_303_3	275.29	-152.217	90.544	no cnx
2018_04_23_exp3_AB	Rorb	Ai167	1	interneuron	2	201	86.484	TSeries_303_1	291.856	-87.1998	90.544	no cnx
2018_04_23_exp3_AB	Rorb	Ai167	1	interneuron	2	201	86.484	TSeries_83_1	384.43	-81.415	60.614	no cnx
2018_04_23_exp3_AB	Rorb	Ai167	1	interneuron	2	201	86.484	TSeries_83_2	277.213	-40.3569	60.614	no cnx
2018_04_23_exp3_AB	Rorb	Ai167	1	interneuron	2	201	86.484	TSeries_83_3	345.625	-41.6011	60.614	no cnx
2018_04_23_exp3_AB	Rorb	Ai167	1	interneuron	2	201	86.484	TSeries_583_1	214.081	-268.209	99.884	no cnx
2018_04_23_exp3_AB	Rorb	Ai167	1	interneuron	2	201	86.484	TSeries_583_2	357.846	-314.402	99.884	no cnx
2018_04_23_exp3_AB	Rorb	Ai167	1	interneuron	2	201	86.484	TSeries_583_3	378.134	-154.023	99.884	no cnx
2018_04_23_exp1_TH	Rorb	Ai167	1	interneuron	2	178	-443.051	TSeries_148_3	415.23	65.1749	-386.781	no cnx
2018_04_23_exp1_TH	Rorb	Ai167	1	interneuron	2	178	-443.051	TSeries_148_2	358.456	-20.943	-386.781	no cnx
2018_04_23_exp1_TH	Rorb	Ai167	1	interneuron	2	178	-443.051	TSeries_148_1	385.565	-0.41134	-386.781	no cnx
2018_04_23_exp1_TH	Rorb	Ai167	1	interneuron	2	178	-443.051	TSeries_68_1	421.825	-75.2896	-425.321	no cnx
2018_04_23_exp1_TH	Rorb	Ai167	1	interneuron	2	178	-443.051	TSeries_68_2	398.625	-5.45099	-425.321	no cnx
2018_04_23_exp1_TH	Rorb	Ai167	1	interneuron	2	178	-443.051	TSeries_208_1	321.573	23.5595	-469.331	no cnx
2018_04_23_exp1_TH	Rorb	Ai167	1	interneuron	2	178	-443.051	TSeries_228_2	274.262	-153.633	-484.491	no cnx
2018_04_23_exp1_TH	Rorb	Ai167	1	interneuron	2	178	-443.051	TSeries_228_3	347.654	-141.585	-484.491	no cnx
2018_04_23_exp1_TH	Rorb	Ai167	1	interneuron	2	178	-443.051	TSeries_228_1	398.779	18.4213	-484.491	no cnx
2018_04_23_exp1_TH	Rorb	Ai167	1	interneuron	2	178	-443.051	TSeries_108_1	362.659	-0.152281	-420.831	no cnx
2018_04_23_exp1_TH	Rorb	Ai167	1	interneuron	2	178	-443.051	TSeries_28_1	364.959	-42.4253	-427.771	no cnx
2018_04_23_exp1_TH	Rorb	Ai167	1	interneuron	2	178	-443.051	TSeries_28_2	355.476	-18.0316	-427.771	no cnx
2018_04_23_exp1_TH	Rorb	Ai167	1	interneuron	2	178	-443.051	TSeries_128_1	361.35	37.2493	-399.741	no cnx

[truncated: 4 more sheets: Fig7D_exc_amps_binned, Fig7E_Pvalb_L23PC_map, Fig7E_Sst_L23PC_map, Fig7e_inh_amps_binned]
