# Supplementary material for: Synaptic connectivity to L2/3 of primary visual cortex measured by two-photon optogenetic stimulation
Source: eLife. 2022 Jan 21;11:e71103. doi: 10.7554/eLife.71103 (PMC8824465; doi:10.7554/eLife.71103)
Supplement: Figure 8—source data 1. [file elife-71103-fig8-data1.xlsx]

## Sheet: Fig8B_exc_PPR_pia
Penk_L23PC_PPR	1.20135	1.83611	1.24121	0.959494	0.980634	1.40596	1.14524
Penk_L23PC_prePia	115.688	111.737	125.017	112.05	119.067	181.452	126.723
Rorb_L23PC_PPR	0.996601	0.706253	0.669267	0.933901	0.84334	0.575637	0.441234	0.692509	1.09749	0.323087	0.424649	1.21697	0.840278	0.8723	0.567806	0.935749	0.886406	0.814071	1.1041	0.577411	1.24719	1.37042	1.19137	0.48073	0.982628	0.92006	0.709338	0.955359	0.7191	0.931026	0.822466	1.03753	1.15331	0.843611	0.876424	1.23488	0.548695	0.954436	0.712161	0.793249	0.818216	1.14696	0.814386	1.11118	0.961519	1.10068	1.01994	0.927769	0.826076
Rorb_L23PC_prePia	420.448	341.446	410.72	454.868	589.167	449.123	342.475	319.712	377.459	417.434	325.773	373.095	355.633	381.854	323.421	451.072	370.381	396.893	393.078	539.16	523.333	578.446	572.137	553.442	559.506	412.201	534.936	434.06	557.964	515.437	506.822	401.983	506.02	455.218	571.172	559.841	213.939	243.671	594.776	520.003	463.442	464.523	473.745	483.375	504.948	496.082	338.685	421.549	461.034
Tlx3_L23PC_PPR	0.653975	0.561511	1.31729	0.911709	0.536189	1.16646	0.828738	0.849073	1.27041	1.23904	0.432359	1.00873	0.901924	0.480888	0.90092	1.13864	0.955525	0.813964	0.869895	1.07766	0.965731	0.954673	1.26638	0.963077	0.906315
Tlx3_L23PC_prePia	435.981	444.841	520.943	376.528	527.679	555.928	531.53	503.127	546.404	706.342	526.84	566.51	661.359	651.202	553.11	567.002	617.205	715.185	715.462	518.048	472.183	556.878	455.383	515.623	466.566
Penk_L23FSI_PPR	1.20054	1.77445	1.61998	0.80214	0.999339	0.791776	1.44895	1.2638	1.07637	1.32216
Penk_L23FSI_prePia	156.642	114.658	180.684	205.054	232.715	109.976	108.515	101.135	134.332	172.402
Rorb_L23FSI_PPR	0.657866	0.435368	0.573957	0.53699	1.33937	1.73673	0.703082	0.798313	0.735297	0.476582
Rorb_L23FSI_prePia	371.241	324.045	479.268	263.333	251.749	359.733	396.858	385.654	429.817	403.499
Tlx3_L23FSI_PPR	0.643226	0.788508	0.339455	0.768746	0.862936
Tlx3_L23FSI_prePia	505.93	671.342	622.63	622.581	494.345
[truncated: 3 more columns]

## Sheet: Fig8C_inh_PPR_pia
Sst_L23PC_PPR	1.05197	0.92392	1.05243	0.998673	0.999258	1.13045	1.06864	1.42132	1.08163	1.09226	1.09403	1.07938	0.927974	1.14292	1.1925	1.19206	1.06503	0.996769	1.09649	1.16958	0.841451	1.05899	1.26992	0.959461	1.03712	1.26834	0.809691	1.03006	1.00184	1.11205	1.02081	1.12535	1.08024	1.1299	1.23788	1.02019	0.95932
Sst_L23PC_prePia	267.995	272.268	271.336	339.772	275.041	409.537	404.715	326.721	534.416	406.306	303.069	378.775	315.451	284.212	274.07	318.981	257.999	276.383	335.462	438.345	363.498	351.092	332.586	229.118	217.914	477.222	496.933	251.602	241.247	412.565	629.126	407.759	445.413	389.872	347.984	455.593	172.123
Pvalb_L23PC_PPR	1.03746	0.999626	0.848862	1.05535	0.834756	0.870289	0.924913	1.08889	0.956402	0.899764	0.701361	0.744985	0.709172	0.768616	0.724756	0.966331	0.861243	1.05121	1.04158
Pvalb_L23PC_prePia	308.685	329.751	84.4096	312.15	425.474	388.154	475.154	417.467	389.347	214.961	358.018	357.913	365.144	212.398	214.549	261.68	183.734	384.787	418.024
Sst_L23FSI_PPR	1.05561	1.05662	0.502625	0.704033	1.04184	1.49459	1.00876	0.899187	0.812215	0.798048
Sst_L23FSI_prePia	304.225	305.688	440.867	275.456	377.814	450.786	465.009	508.623	406.996	462.726
Pvalb_L23FSI_PPR	0.910654	0.904952	0.703395	0.655272	0.866024	0.612046	0.735999	0.827562	0.732804
Pvalb_L23FSI_prePia	360.654	85.4188	311.265	208.752	274.74	311.489	270.219	327.387	291.053
