# Supplementary material for: Synaptic connectivity to L2/3 of primary visual cortex measured by two-photon optogenetic stimulation
Source: eLife. 2022 Jan 21;11:e71103. doi: 10.7554/eLife.71103 (PMC8824465; doi:10.7554/eLife.71103)
Supplement: Figure 9—source data 1. [file elife-71103-fig9-data1.xlsx]

## Sheet: Pvalb_L23PC_convergence
cell1_pre_x_ap	-131.115	-10.794	-76.1814
cell1_pre_y_pia	100.422	84.4096	194.205
cell1_post_y_pia	90
cell2_pre_x_ap	16.2558	-55.79	-248.293	-10.5859	10.3726
cell2_pre_y_pia	180.298	134.299	289.069	347.684	183.734
cell2_post_y_pia	93
cell3_pre_x_ap	47.6754	3.06593
cell3_pre_y_pia	308.685	347.374
cell3_post_y_pia	139
cell4_pre_x_ap	35.8079	-181.657	-27.184
cell4_pre_y_pia	311.19	117.853	331.418
cell4_post_y_pia	142
cell5_pre_x_ap	47.6904	226.403	100.219
cell5_pre_y_pia	475.154	449.7	300.777
cell5_post_y_pia	148
cell6_pre_x_ap	-38.679	-32.8931	5.38281	58.2936
cell6_pre_y_pia	205.197	418.024	341.52	210.459
cell6_post_y_pia	170
cell7_pre_x_ap	-31.2587	-200.482	-57.1361	8.37186
cell7_pre_y_pia	369.151	297.056	340.737	340.94
cell7_post_y_pia	173
cell8_pre_x_ap	60.9348	11.7969	53.1759
cell8_pre_y_pia	415.198	212.398	332.752
cell8_post_y_pia	176
cell9_pre_x_ap	79.3762	-35.0073	158.731
cell9_pre_y_pia	384.787	331.002	412.856
cell9_post_y_pia	177
cell10_pre_x_ap	148.126	102.922
cell10_pre_y_pia	341.234	127.848
cell10_post_y_pia	177
cell11_pre_x_ap	-41.0863	-28.2672	104.517
cell11_pre_y_pia	261.68	214.549	337.29
cell11_post_y_pia	178
cell12_pre_x_ap	-15.6762	176.827	248.873
cell12_pre_y_pia	271.502	116.731	162.73
cell12_post_y_pia	178
cell13_pre_x_ap	10.114	-18.8278
cell13_pre_y_pia	158.95	399.96
cell13_post_y_pia	178
cell14_pre_x_ap	68.5325	35.618	66.686	9.52461
cell14_pre_y_pia	425.474	384.381	312.15	254.982
cell14_post_y_pia	180
cell15_pre_x_ap	-113.076	-142.724	11.2358	-49.3518	-52.488	-109.537	-102.483	-37.1469
cell15_pre_y_pia	262.511	279.843	289.893	349.03	214.961	236.284	181.998	311.175
cell15_post_y_pia	184
cell16_pre_x_ap	-189.194	-19.2316
cell16_pre_y_pia	283.803	249.259
cell16_post_y_pia	192
cell17_pre_x_ap	7.26846	-20.885
cell17_pre_y_pia	186.882	388.154
cell17_post_y_pia	204
cell18_pre_x_ap	-18.893	20.3331	-7.79717
cell18_pre_y_pia	423.567	392.44	357.913
cell18_post_y_pia	205
cell19_pre_x_ap	-70.7895	-123.062
cell19_pre_y_pia	537.017	614.155
cell19_post_y_pia	228
cell20_pre_x_ap	53.0633	41.9674	-143.799	81.1935
cell20_pre_y_pia	365.144	430.798	375.407	399.671
cell20_post_y_pia	232
cell21_pre_x_ap	-37.2922	-26.1963	1.9339
cell21_pre_y_pia	423.673	358.018	392.545
cell21_post_y_pia	251
cell22_pre_x_ap	-42.6304	100.847
cell22_pre_y_pia	417.467	389.347
cell22_post_y_pia	271

## Sheet: Sst_L23PC_convergence
cell1_pre_x_ap	-89.7223	-28.352	108.215	94.2352	45.7019	17.7663	77.386	160.086	-129.797
cell1_pre_y_pia	257.999	318.981	294.534	472.229	274.07	284.212	346.601	360.403	283.989
cell1_post_y_pia	137
cell2_pre_x_ap	-7.81553	-34.4033
cell2_pre_y_pia	272.268	149.409
cell2_post_y_pia	147
cell3_pre_x_ap	48.0571	11.5609	70.2854	76.3991
cell3_pre_y_pia	194.069	193.071	412.565	376.069
cell3_post_y_pia	161
cell4_pre_x_ap	170.942	69.462	69.4962	109.571
cell4_pre_y_pia	315.451	378.775	280.459	254.47
cell4_post_y_pia	162
cell5_pre_x_ap	-56.8937	109.105	-72.3209	249.584
cell5_pre_y_pia	222.13	404.715	288.311	145.799
cell5_post_y_pia	163
cell6_pre_x_ap	-80.5783	30.7123	64.5075	-0.713485
cell6_pre_y_pia	435.099	496.067	414.955	213.524
cell6_post_y_pia	166
cell7_pre_x_ap	-191.71	-133.457	-24.5966	-123.975	137.996
cell7_pre_y_pia	104.186	257.942	287.62	214.489	167.81
cell7_post_y_pia	171
cell8_pre_x_ap	-90.0175	64.9067
cell8_pre_y_pia	389.715	326.721
cell8_post_y_pia	173
cell9_pre_x_ap	23.0302	68.9044	-111.121
cell9_pre_y_pia	270.272	447.804	347.902
cell9_post_y_pia	174
cell10_pre_x_ap	60.6401	-114.041
cell10_pre_y_pia	224.586	203.845
cell10_post_y_pia	176
cell11_pre_x_ap	47.0736	29.9568	-129.999	21.6354	-43.3028	-158.674
cell11_pre_y_pia	500.684	414.286	286.555	417.539	270.3	419.656
cell11_post_y_pia	179
cell12_pre_x_ap	95.2492	-5.8633
cell12_pre_y_pia	339.772	275.041
cell12_post_y_pia	180
cell13_pre_x_ap	62.8704	-95.5049
cell13_pre_y_pia	133.234	268.132
cell13_post_y_pia	184
cell14_pre_x_ap	3.55457	123.006	-64.8513	-156.373	-37.0587	95.8572	48.1966
cell14_pre_y_pia	363.498	351.092	332.586	319.823	390.887	299.581	239.728
cell14_post_y_pia	196
cell15_pre_x_ap	-62.3493	-172.24
cell15_pre_y_pia	252.906	550.519
cell15_post_y_pia	197
cell16_pre_x_ap	-40.1075	-122.646	7.8196
cell16_pre_y_pia	195.901	201.34	290.02
cell16_post_y_pia	200
cell17_pre_x_ap	-44.6497	-6.05219	77.0091
cell17_pre_y_pia	191.724	232.505	295.751
cell17_post_y_pia	205
cell18_pre_x_ap	-31.638	16.86
cell18_pre_y_pia	157.612	248.427
cell18_post_y_pia	209
cell19_pre_x_ap	-80.596	-0.244007
cell19_pre_y_pia	197.293	218.294
cell19_post_y_pia	210
cell20_pre_x_ap	-77.7762	17.4636
cell20_pre_y_pia	215.986	654.963
cell20_post_y_pia	212
cell21_pre_x_ap	67.1694	30.0937	131.732
cell21_pre_y_pia	248.181	534.416	559.927
cell21_post_y_pia	213
cell22_pre_x_ap	61.2361	12.2254	43.9499	-109.433	-70.8359	-48.7907
cell22_pre_y_pia	279.561	312.725	217.914	208.699	249.479	404.165
cell22_post_y_pia	215
cell23_pre_x_ap	-98.5817	-136.597
cell23_pre_y_pia	303.069	343.507
cell23_post_y_pia	216
cell24_pre_x_ap	-73.2941	33.5444	-21.8144
cell24_pre_y_pia	242.581	283.29	276.28
cell24_post_y_pia	220
cell25_pre_x_ap	20.2256	49.1636
cell25_pre_y_pia	409.537	497.285
cell25_post_y_pia	235
cell26_pre_x_ap	-40.8984	-42.9108
cell26_pre_y_pia	272.299	276.383
cell26_post_y_pia	239
cell27_pre_x_ap	-78.2478	-127.257
cell27_pre_y_pia	412.342	241.247
cell27_post_y_pia	243
cell28_pre_x_ap	-24.3451	-39.3916	-26.4767
cell28_pre_y_pia	317.601	335.462	245.4
cell28_post_y_pia	244
cell29_pre_x_ap	22.3641	170.016
cell29_pre_y_pia	387.666	335.79
cell29_post_y_pia	250
cell30_pre_x_ap	29.2156	66.9815	6.93572
cell30_pre_y_pia	251.818	251.602	496.933
cell30_post_y_pia	253
cell31_pre_x_ap	24.1671	-180.36	-218.375
cell31_pre_y_pia	329.754	304.692	345.13
cell31_post_y_pia	255
cell32_pre_x_ap	-68.7506	6.29767	-60.4292	-2.81096
cell32_pre_y_pia	407.759	629.126	404.506	424.926
cell32_post_y_pia	281
cell33_pre_x_ap	-93.6322	-0.89167	-32.6162	16.3946	147.432
cell33_pre_y_pia	415.369	229.118	323.929	290.765	499.776
cell33_post_y_pia	293
cell34_pre_x_ap	109.408	133.668	-15.521	53.1947	168.192
cell34_pre_y_pia	500.08	535.201	539.467	564.136	473.746
cell34_post_y_pia	294
cell35_pre_x_ap	-7.53484	-59.178	-86.7741	28.4937	-135.396	76.5432	-45.5851
cell35_pre_y_pia	295.264	347.984	389.872	449.696	346.171	373.972	445.413
cell35_post_y_pia	302
cell36_pre_x_ap	78.2975	78.1996	43.0889	30.6713	-57.4503
cell36_pre_y_pia	425.839	318.867	401.988	406.584	461.126
cell36_post_y_pia	308
cell37_pre_x_ap	-137.32	2.64334
cell37_pre_y_pia	292.513	438.345
cell37_post_y_pia	340
cell38_pre_x_ap	-25.1744	133.937	29.0361	21.9603	-42.1191
cell38_pre_y_pia	486.384	452.689	412.517	559.45	532.645
cell38_post_y_pia	341

## Sheet: Penk_L23PC_convergence
cell1_pre_x_ap	-43.4085	-26.6549
cell1_pre_y_pia	115.688	111.737
cell1_post_y_pia	95
cell2_pre_x_ap	255.775	62.1259
cell2_pre_y_pia	141.955	125.017
cell2_post_y_pia	141
cell3_pre_x_ap	82.0594	190.122	95.2048
cell3_pre_y_pia	184.265	126.723	153.212
cell3_post_y_pia	146
cell4_pre_x_ap	-29.3473	3.06889
cell4_pre_y_pia	181.452	119.067
cell4_post_y_pia	166

## Sheet: Rorb_L23PC_convergence
cell1_pre_x_ap	-80.4427	7.39161	24.2549
cell1_pre_y_pia	444.227	359.085	439.389
cell1_post_y_pia	97
cell2_pre_x_ap	-158.262	-241.493
cell2_pre_y_pia	312.718	318.564
cell2_post_y_pia	130
cell3_pre_x_ap	-130.382	28.7121	80.1484
cell3_pre_y_pia	318.989	213.939	243.671
cell3_post_y_pia	141
cell4_pre_x_ap	64.1058	142.271	67.8251
cell4_pre_y_pia	429.119	548.661	470.043
cell4_post_y_pia	143
cell5_pre_x_ap	273.43	170.872
cell5_pre_y_pia	547.678	559.841
cell5_post_y_pia	143
cell6_pre_x_ap	-115.436	8.12908	-9.72345	196.593	23.2011
cell6_pre_y_pia	478.144	450.108	368.08	421.254	471.906
cell6_post_y_pia	147
cell7_pre_x_ap	19.0066	7.38353	-18.2365	-20.2351	17.5138	-6.31722
cell7_pre_y_pia	381.162	446.486	445.167	383.959	369.53	458.44
cell7_post_y_pia	154
cell8_pre_x_ap	116.12	98.268	-179.199	319.849
cell8_pre_y_pia	458.511	376.483	505.16	414.28
cell8_post_y_pia	155
cell9_pre_x_ap	126.734	-147.598
cell9_pre_y_pia	416.502	480.665
cell9_post_y_pia	157
cell10_pre_x_ap	-130.398	-49.8995	-8.25262	-52.5898	-7.50726
cell10_pre_y_pia	362.993	344.404	290.216	425.156	383.204
cell10_post_y_pia	168
cell11_pre_x_ap	85.8612	7.74582	60.3031
cell11_pre_y_pia	579.56	545.745	478.766
cell11_post_y_pia	177
cell12_pre_x_ap	-310.671	8.93525	-291.603	45.1073	-82.7958
cell12_pre_y_pia	572.137	578.446	523.333	543.928	553.442
cell12_post_y_pia	177
cell13_pre_x_ap	-121.146	87.3149	70.9951	-190.574	10.9256	173.642	54.0115
cell13_pre_y_pia	457.431	488.135	461.034	397.005	447.053	394.31	468.115
cell13_post_y_pia	180
cell14_pre_x_ap	29.7323	-254.647	76.1833
cell14_pre_y_pia	594.776	520.003	440.46
cell14_post_y_pia	185
cell15_pre_x_ap	-120.331	-41.0406	44.2915	57.6064
cell15_pre_y_pia	589.476	529.184	598.393	370.197
cell15_post_y_pia	185
cell16_pre_x_ap	168.113	8.83087	75.0504	-115.848	20.8804	111.655
cell16_pre_y_pia	501.839	571.172	506.02	455.218	401.983	506.822
cell16_post_y_pia	185
cell17_pre_x_ap	-158.671	-42.5983	-109.542
cell17_pre_y_pia	534.936	495.001	412.201
cell17_post_y_pia	187
cell18_pre_x_ap	79.354	-5.71022
cell18_pre_y_pia	486.561	525.952
cell18_post_y_pia	193
cell19_pre_x_ap	62.2935	247.108	226.667	169.435	125.627	320.062
cell19_pre_y_pia	488.804	412.626	323.421	451.072	332.878	415.9
cell19_post_y_pia	199
cell20_pre_x_ap	-12.9872	17.4868
cell20_pre_y_pia	389.346	408.988
cell20_post_y_pia	201
cell21_pre_x_ap	-351.715	-125.379
cell21_pre_y_pia	568.829	557.964
cell21_post_y_pia	202
cell22_pre_x_ap	43.4043	60.5054	-8.76978	100.996
cell22_pre_y_pia	400.617	330.756	302.99	459.799
cell22_post_y_pia	202
cell23_pre_x_ap	10.6743	-37.741
cell23_pre_y_pia	482.577	447.018
cell23_post_y_pia	203
cell24_pre_x_ap	-2.26215	139.366
cell24_pre_y_pia	565.524	530.521
cell24_post_y_pia	206
cell25_pre_x_ap	72.5176	64.5328	15.359
cell25_pre_y_pia	413.978	368.127	349.197
cell25_post_y_pia	209
cell26_pre_x_ap	-91.2433	195.152
cell26_pre_y_pia	349.619	366.435
cell26_post_y_pia	209
cell27_pre_x_ap	236.324	27.675	-42.858
cell27_pre_y_pia	496.082	567.113	504.948
cell27_post_y_pia	211
cell28_pre_x_ap	-30.0311	-31.2812
cell28_pre_y_pia	483.375	599.449
cell28_post_y_pia	212
cell29_pre_x_ap	280.949	267.09	217.752	-39.4764	117.437	119.612	190.594	137.765	291.061	42.3606	-3.07729
cell29_pre_y_pia	445.263	381.854	293.181	498.871	417.434	487.661	464.355	475.072	373.095	325.773	355.633
cell29_post_y_pia	214
cell30_pre_x_ap	151.854	190.689
cell30_pre_y_pia	437.774	468.864
cell30_post_y_pia	214
cell31_pre_x_ap	53.5247	27.2415	189.613	65.6064	125.033	165.337	-88.3267	25.5446	9.53516	-37.1402	76.7169	139.16
cell31_pre_y_pia	391.442	426.208	409.552	421.549	408.003	426.567	352.752	409.224	385.193	436.219	369.135	338.685
cell31_post_y_pia	215
cell32_pre_x_ap	73.0559	60.6825	126.531	103.029	156.392	120.499	126.344	105.328	89.9707
cell32_pre_y_pia	678.587	484.104	646.982	581.526	462.722	660.054	468.786	478.825	756.586
cell32_post_y_pia	220
cell33_pre_x_ap	-2.26818	0.528655
cell33_pre_y_pia	315.635	304.916
cell33_post_y_pia	220
cell34_pre_x_ap	-194.54	-106.705	-280.67	-89.842
cell34_pre_y_pia	447.761	362.618	335.404	442.922
cell34_post_y_pia	222
cell35_pre_x_ap	180.122	216.056
cell35_pre_y_pia	673.35	524.924
cell35_post_y_pia	224
cell36_pre_x_ap	13.8774	-59.9898
cell36_pre_y_pia	341.446	450.416
cell36_post_y_pia	224
cell37_pre_x_ap	132.505	141.545	-68.1858	111.511	188.397	232.476
cell37_pre_y_pia	513.392	494.817	393.078	395.627	453.494	420.051
cell37_post_y_pia	226
cell38_pre_x_ap	148.678	80.3975	-25.491
cell38_pre_y_pia	401.401	449.123	342.475
cell38_post_y_pia	227
cell39_pre_x_ap	413.034	133.936	238.683	124.689	269.255
cell39_pre_y_pia	539.16	504.964	486.986	497.72	369.872
cell39_post_y_pia	230
cell40_pre_x_ap	205.353	172.173
cell40_pre_y_pia	410.198	400.33
cell40_post_y_pia	230
cell41_pre_x_ap	-89.4311	99.1407
cell41_pre_y_pia	496.02	420.448
cell41_post_y_pia	236
cell42_pre_x_ap	-171.341	-53.4653
cell42_pre_y_pia	437.548	385.983
cell42_post_y_pia	239
cell43_pre_x_ap	-214.28	-244.595	-92.7296	-208.041
cell43_pre_y_pia	443.323	422.872	371.584	583.019
cell43_post_y_pia	242
cell44_pre_x_ap	193.544	-100.594	20.887	40.2476	-136.993	93.8414
cell44_pre_y_pia	377.459	359.996	439.744	479.436	503.235	443.018
cell44_post_y_pia	244
cell45_pre_x_ap	-180.56	260.736	24.0435
cell45_pre_y_pia	598.17	319.712	572.919
cell45_post_y_pia	247
cell46_pre_x_ap	264.642	60.2025	220.663
cell46_pre_y_pia	559.506	402.876	423.184
cell46_post_y_pia	247
cell47_pre_x_ap	43.9334	96.4462	57.6117
cell47_pre_y_pia	451.068	476.016	444.926
cell47_post_y_pia	248
cell48_pre_x_ap	-79.7498	10.4039
cell48_pre_y_pia	454.868	410.72
cell48_post_y_pia	249
cell49_pre_x_ap	-1.32409	32.6616
cell49_pre_y_pia	356.459	318.496
cell49_post_y_pia	250
cell50_pre_x_ap	-49.5565	32.225
cell50_pre_y_pia	598.873	444.173
cell50_post_y_pia	252
cell51_pre_x_ap	68.8859	-39.7735	-35.2752	19.8781	-2.04286	-47.8987	-29.3768
cell51_pre_y_pia	555.664	473.745	464.523	426.914	431.217	463.442	440.159
cell51_post_y_pia	253
cell52_pre_x_ap	33.577	52.2478	45.1309	88.7933	142.625	-11.3399
cell52_pre_y_pia	433.25	431.475	419.721	381.301	396.193	417.962
cell52_post_y_pia	253
cell53_pre_x_ap	54.638	52.4184	-7.46284
cell53_pre_y_pia	418.259	503.515	406.912
cell53_post_y_pia	253
cell54_pre_x_ap	-468.925	-187.632	193.285
cell54_pre_y_pia	778.067	589.121	566.978
cell54_post_y_pia	262
cell55_pre_x_ap	89.4798	110.474	126.142	100.503	-90.2174
cell55_pre_y_pia	399.442	517.207	463.81	370.381	396.893
cell55_post_y_pia	268
cell56_pre_x_ap	-72.8243	73.2483	-78.345	-54.4206
cell56_pre_y_pia	447.594	499.516	527.81	505.911
cell56_post_y_pia	269
cell57_pre_x_ap	14.5509	-52.5069
cell57_pre_y_pia	400.395	424.164
cell57_post_y_pia	275
cell58_pre_x_ap	174.881	135.774	51.6386
cell58_pre_y_pia	341.031	423.184	411.767
cell58_post_y_pia	278
cell59_pre_x_ap	-158.486	-274.596
cell59_pre_y_pia	683.353	755.785
cell59_post_y_pia	311
cell60_pre_x_ap	215.564	230.674
cell60_pre_y_pia	493.38	385.872
cell60_post_y_pia	317

## Sheet: Tlx3_L23PC_convergence
cell1_pre_x_ap	86.6589	96.2539
cell1_pre_y_pia	434.711	433.861
cell1_post_y_pia	126
cell2_pre_x_ap	276.217	241.02	183.766	304.869	71.6965	192.87
cell2_pre_y_pia	540.685	534.629	481.18	531.53	584.543	513.103
cell2_post_y_pia	155
cell3_pre_x_ap	-370.213	-392.948	-327.403
cell3_pre_y_pia	661.359	713.725	651.202
cell3_post_y_pia	160
cell4_pre_x_ap	125.109	134.824
cell4_pre_y_pia	399.533	406.045
cell4_post_y_pia	164
cell5_pre_x_ap	-69.0791	105.392	-43.1822	21.9934	-18.6287	-56.1609	105.511	-31.5726
cell5_pre_y_pia	376.528	527.679	541.837	543.114	560.233	555.928	511.043	520.943
cell5_post_y_pia	184
cell6_pre_x_ap	89.968	73.3914	135.243	128.228	27.548
cell6_pre_y_pia	589.271	615.173	546.404	549.803	706.342
cell6_post_y_pia	188
cell7_pre_x_ap	-153.57	8.63132	-111.079
cell7_pre_y_pia	518.048	580.108	563.675
cell7_post_y_pia	189
cell8_pre_x_ap	219.13	226.605	229.006
cell8_pre_y_pia	439.277	444.841	435.981
cell8_post_y_pia	198
cell9_pre_x_ap	80.5764	42.3358
cell9_pre_y_pia	339.342	340.89
cell9_post_y_pia	210
cell10_pre_x_ap	223.439	219.584
cell10_pre_y_pia	403.442	415.588
cell10_post_y_pia	215
cell11_pre_x_ap	295.567	201.983
cell11_pre_y_pia	545.715	523.645
cell11_post_y_pia	216
cell12_pre_x_ap	-179.407	-144.223
cell12_pre_y_pia	706.519	715.185
cell12_post_y_pia	223
cell13_pre_x_ap	-296.855	-292.824
cell13_pre_y_pia	597.816	571.873
cell13_post_y_pia	231
cell14_pre_x_ap	-57.2213	-109.5	-144.589	-75.8331	-230.145
cell14_pre_y_pia	472.183	556.878	575.54	478.313	455.383
cell14_post_y_pia	231
cell15_pre_x_ap	-72.3574	-139.904	-78.1221
cell15_pre_y_pia	466.566	515.623	561.806
cell15_post_y_pia	239
cell16_pre_x_ap	132.925	124.415	152.697	152.684
cell16_pre_y_pia	615.695	595.856	730.035	715.462
cell16_post_y_pia	240
cell17_pre_x_ap	139.888	55.5513
cell17_pre_y_pia	492.009	468.198
cell17_post_y_pia	241
cell18_pre_x_ap	245.289	123.872	204.621	165.537
cell18_pre_y_pia	566.51	539.712	548.512	526.84
cell18_post_y_pia	245
cell19_pre_x_ap	-185.092	-172.76	-166.83	-75.4635	-292.412	-297.472	-177.658	-172.183
cell19_pre_y_pia	748.997	611.101	567.002	704.551	634.289	569.592	617.205	565.002
cell19_post_y_pia	251
cell20_pre_x_ap	194.583	233.667
cell20_pre_y_pia	523.97	545.642
cell20_post_y_pia	273
cell21_pre_x_ap	176.299	100.702	91.9344
cell21_pre_y_pia	550.26	458.737	474.183
cell21_post_y_pia	274
cell22_pre_x_ap	118.568	133.517
cell22_pre_y_pia	589.759	669.385
cell22_post_y_pia	316

## Sheet: Fig9B_exc_L23PC_conv_ij_dist
ij_horiz_d_bins	0	100	200	300	400	500	600
Penk_L23PC_ij_horiz_d_i_cnx_hist	292	185	79	40	16	2
Penk_L23PC_ij_horiz_d_ij_cnx_hist	8	4	0	0	0	0
Penk_L23PC_ij_horiz_d_conv_frac	0.0273973	0.0216216	0	0	0	0
Penk_L23PC_ij_horiz_d_ci_low	0.0130358	0.00734119	6.19597e-06	1.21993e-05	3.02135e-05	0.000216908
Penk_L23PC_ij_horiz_d_ci_high	0.0510264	0.0505831	0.031199	0.060498	0.143184	0.666822
Rorb_L23PC_ij_horiz_d_i_cnx_hist	4444	2562	1084	431	165	107
Rorb_L23PC_ij_horiz_d_ij_cnx_hist	520	234	102	26	4	0
Rorb_L23PC_ij_horiz_d_conv_frac	0.117012	0.0913349	0.0940959	0.0603248	0.0242424	0
Rorb_L23PC_ij_horiz_d_ci_low	0.107811	0.0806406	0.0777966	0.0407322	0.00823692	4.57839e-06
Rorb_L23PC_ij_horiz_d_ci_high	0.126711	0.102952	0.112559	0.0857918	0.0566024	0.0231491
Tlx3_L23PC_ij_horiz_d_i_cnx_hist	2103	921	280	79	22	8
Tlx3_L23PC_ij_horiz_d_ij_cnx_hist	178	70	8	0	0	0
Tlx3_L23PC_ij_horiz_d_conv_frac	0.084641	0.0760043	0.0285714	0	0	0
Tlx3_L23PC_ij_horiz_d_ci_low	0.0733144	0.0602105	0.0135983	6.19597e-06	2.20673e-05	5.94903e-05
Tlx3_L23PC_ij_horiz_d_ci_high	0.0971098	0.094457	0.0531834	0.031199	0.10674	0.262217

## Sheet: Fig9B_inh_L23PC_conv_ij_dist
ij_horiz_d_bins	0	100	200	300	400	500
L23Pvalb_ij_horiz_d_i_cnx_hist	161	81	53	13	6
L23Pvalb_ij_horiz_d_ij_cnx_hist	50	18	8	0	0
L23Pvalb_ij_horiz_d_conv_frac	0.310559	0.222222	0.150943	0	0
L23Pvalb_ij_horiz_d_ci_low	0.24294	0.142418	0.0740413	3.70519e-05	7.84998e-05
L23Pvalb_ij_horiz_d_ci_high	0.38492	0.321466	0.264705	0.172619	0.330389
L23Sst_ij_horiz_d_i_cnx_hist	223	178	85	62	31
L23Sst_ij_horiz_d_ij_cnx_hist	74	42	12	6	0
L23Sst_ij_horiz_d_conv_frac	0.331839	0.235955	0.141176	0.0967742	0
L23Sst_ij_horiz_d_ci_low	0.272514	0.178167	0.079558	0.0414136	1.57125e-05
L23Sst_ij_horiz_d_ci_high	0.395496	0.302249	0.226716	0.188613	0.07723
transPvalb_ij_horiz_d_i_cnx_hist	425	213	191	80	12
transPvalb_ij_horiz_d_ij_cnx_hist	34	12	2	0	0
transPvalb_ij_horiz_d_conv_frac	0.08	0.056338	0.0104712	0	0
transPvalb_ij_horiz_d_ci_low	0.0570329	0.0311631	0.00218216	6.11876e-06	4.00753e-05
transPvalb_ij_horiz_d_ci_high	0.10866	0.0934404	0.0331636	0.0308163	0.185306
transSst_ij_horiz_d_i_cnx_hist	612	402	161	72	19
transSst_ij_horiz_d_ij_cnx_hist	86	50	6	0	0
transSst_ij_horiz_d_conv_frac	0.140523	0.124378	0.0372671	0	0
transSst_ij_horiz_d_ci_low	0.114707	0.0948394	0.0157023	6.79626e-06	2.55058e-05
transSst_ij_horiz_d_ci_high	0.169728	0.159301	0.0751908	0.0341694	0.122309

## Sheet: Fig9C_exc_L23PC_conv_post_j_dis
postToj_horiz_d_bins	0	100	200	300	400	500	600
Penk_L23PC_postToj_horiz_d_i_cnx_hist	232	184	94	48	33	23
Penk_L23PC_postToj_horiz_d_ij_cnx_hist	9	2	1	0	0	0
Penk_L23PC_postToj_horiz_d_conv_frac	0.0387931	0.0108696	0.0106383	0	0	0
Penk_L23PC_postToj_horiz_d_ci_low	0.0193653	0.00226542	0.00115025	1.01767e-05	1.47674e-05	2.11183e-05
Penk_L23PC_postToj_horiz_d_ci_high	0.0695965	0.0344084	0.0486364	0.0507273	0.0727587	0.102394
Rorb_L23PC_postToj_horiz_d_i_cnx_hist	4196	2537	1200	532	205	151
Rorb_L23PC_postToj_horiz_d_ij_cnx_hist	475	298	96	13	6	0
Rorb_L23PC_postToj_horiz_d_conv_frac	0.113203	0.117462	0.08	0.0244361	0.0292683	0
Rorb_L23PC_postToj_horiz_d_ci_low	0.103884	0.105371	0.0656573	0.0137646	0.0123069	3.2465e-06
Rorb_L23PC_postToj_horiz_d_ci_high	0.123056	0.130425	0.0963653	0.0402493	0.0593253	0.0164707
Tlx3_L23PC_postToj_horiz_d_i_cnx_hist	1078	1079	655	246	208	87
Tlx3_L23PC_postToj_horiz_d_ij_cnx_hist	87	111	47	11	0	0
Tlx3_L23PC_postToj_horiz_d_conv_frac	0.080705	0.102873	0.0717557	0.0447154	0	0
Tlx3_L23PC_postToj_horiz_d_ci_low	0.0655638	0.0858115	0.0538599	0.0239863	2.3579e-06	5.62786e-06
Tlx3_L23PC_postToj_horiz_d_ci_high	0.0980934	0.122061	0.0934239	0.0760487	0.0119897	0.0283794

## Sheet: Fig8C_inh_L23PC_conv_post_j_dis
postToj_horiz_d_bins	0	100	200	300	400	500	600
L23Pvalb_postToj_horiz_d_i_cnx_hist	125	101	55	32	2	2
L23Pvalb_postToj_horiz_d_ij_cnx_hist	41	30	5	0	0	0
L23Pvalb_postToj_horiz_d_conv_frac	0.328	0.29703	0.0909091	0	0	0
L23Pvalb_postToj_horiz_d_ci_low	0.25036	0.214579	0.0355418	1.52253e-05	0.000216908	0.000216908
L23Pvalb_postToj_horiz_d_ci_high	0.413501	0.390924	0.187807	0.0749278	0.666822	0.666822
L23Sst_postToj_horiz_d_i_cnx_hist	220	191	79	61	16	24
L23Sst_postToj_horiz_d_ij_cnx_hist	91	41	2	0	0	0
L23Sst_postToj_horiz_d_conv_frac	0.413636	0.21466	0.0253165	0	0	0
L23Sst_postToj_horiz_d_ci_low	0.350037	0.160988	0.00529739	8.01679e-06	3.02135e-05	2.02476e-05
L23Sst_postToj_horiz_d_ci_high	0.479491	0.276902	0.0787328	0.0401809	0.143184	0.0983876
transPvalb_postToj_horiz_d_i_cnx_hist	379	234	210	96	4	6
transPvalb_postToj_horiz_d_ij_cnx_hist	40	7	1	0	0	0
transPvalb_postToj_horiz_d_conv_frac	0.105541	0.0299145	0.0047619	0	0	0
transPvalb_postToj_horiz_d_ci_low	0.0776165	0.0134782	0.000514279	5.10163e-06	0.000115333	7.84998e-05
transPvalb_postToj_horiz_d_ci_high	0.139459	0.0578303	0.0220382	0.0257603	0.444763	0.330389
transSst_postToj_horiz_d_i_cnx_hist	622	398	144	61	36	18
transSst_postToj_horiz_d_ij_cnx_hist	109	33	0	0	0	0
transSst_postToj_horiz_d_conv_frac	0.175241	0.0829146	0	0	0	0
transSst_postToj_horiz_d_ci_low	0.146907	0.0588222	3.40404e-06	8.01679e-06	1.35454e-05	2.69031e-05
transSst_postToj_horiz_d_ci_high	0.20659	0.113042	0.017263	0.0401809	0.0669445	0.128558

## Sheet: Fig8_supp2_amp_conv
Penk_L23PC_amp_i	0.215734	0.280771	0.292989	0.124972	0.177704	0.13653	0.0969945	0.0969945	0.0639522	0.0639522	0.108946	0.108946
Penk_L23PC_amp_j	0.280771	0.215734	0.124972	0.292989	0.13653	0.177704	0.0639522	0.108946	0.0969945	0.108946	0.0969945	0.0639522
Rorb_L23PC_amp_i	0.101221	0.256783	0.60053	0.213301	0.774848	0.319597	0.632884	0.155393	0.450692	1.56907	0.1553	0.1553	0.1553	0.1553	0.1553	0.0576065	0.0576065	0.0576065	0.0576065	0.0576065	0.385124	0.385124	0.385124	0.385124	0.385124	0.208493	0.208493	0.208493	0.208493	0.208493	0.0994865	0.0994865	0.0994865	0.0994865	0.0994865	0.672381	0.672381	0.672381	0.672381	0.672381	0.14924	0.14924	0.782069	0.782069	0.655237	0.655237	0.140737	0.598231	0.105903
Rorb_L23PC_amp_j	0.256783	0.101221	0.213301	0.60053	0.319597	0.774848	0.155393	0.632884	1.56907	0.450692	0.0576065	0.385124	0.208493	0.0994865	0.672381	0.1553	0.385124	0.208493	0.0994865	0.672381	0.1553	0.0576065	0.208493	0.0994865	0.672381	0.1553	0.0576065	0.385124	0.0994865	0.672381	0.1553	0.0576065	0.385124	0.208493	0.672381	0.1553	0.0576065	0.385124	0.208493	0.0994865	0.782069	0.655237	0.14924	0.655237	0.14924	0.782069	0.598231	0.140737	0.297746
Tlx3_L23PC_amp_i	0.286399	0.235824	0.866704	0.866704	0.884682	0.884682	0.841843	0.841843	0.236699	0.0882412	0.139844	0.158077	0.160195	2.14829	0.0765939	0.329297	0.306044	0.306044	0.306044	0.306044	0.306044	0.306044	0.306044	0.317416	0.317416	0.317416	0.317416	0.317416	0.317416	0.317416	0.564563	0.564563	0.564563	0.564563	0.564563	0.564563	0.564563	0.718997	0.718997	0.718997	0.718997	0.718997	0.718997	0.718997	0.323952	0.323952	0.323952	0.323952	0.323952
Tlx3_L23PC_amp_j	0.235824	0.286399	0.884682	0.841843	0.866704	0.841843	0.866704	0.884682	0.0882412	0.236699	0.158077	0.139844	2.14829	0.160195	0.329297	0.0765939	0.317416	0.564563	0.718997	0.323952	0.0467628	0.057846	0.209447	0.306044	0.564563	0.718997	0.323952	0.0467628	0.057846	0.209447	0.306044	0.317416	0.718997	0.323952	0.0467628	0.057846	0.209447	0.306044	0.317416	0.564563	0.323952	0.0467628	0.057846	0.209447	0.306044	0.317416	0.564563	0.718997	0.0467628
Penk_L23FSI_amp_i	2.68899	2.68899	2.68899	2.68899	2.68899	0.0396443	0.0396443	0.0396443	0.0396443	0.0396443	3.89725	3.89725	3.89725	3.89725	3.89725	1.14586	1.14586	1.14586	1.14586	1.14586	0.323253	0.323253	0.323253	0.323253	0.323253	1.39186	1.39186	1.39186	1.39186	1.39186	0.4831	0.4831	0.4831	0.4831	0.4831	0.4831	0.4831	0.4831	0.666521	0.666521	0.666521	0.666521	0.666521	0.666521	0.666521	0.666521	0.0825916	0.0825916	0.0825916
Penk_L23FSI_amp_j	0.0396443	3.89725	1.14586	0.323253	1.39186	2.68899	3.89725	1.14586	0.323253	1.39186	2.68899	0.0396443	1.14586	0.323253	1.39186	2.68899	0.0396443	3.89725	0.323253	1.39186	2.68899	0.0396443	3.89725	1.14586	1.39186	2.68899	0.0396443	3.89725	1.14586	0.323253	0.666521	0.0825916	1.23545	0.142098	0.806555	0.156263	0.133703	0.13635	0.4831	0.0825916	1.23545	0.142098	0.806555	0.156263	0.133703	0.13635	0.4831	0.666521	1.23545
Rorb_L23FSI_amp_i	0.244709	0.225508	1.72668	1.72668	0.204524	0.204524	0.364662	0.364662	0.156006	0.156006	1.13616	1.13616	0.305312	0.305312	0.204569	0.204569	0.204569	0.350834	0.350834	0.350834	0.411529	0.411529	0.411529	0.447991	0.447991	0.447991	0.396807	0.396807	0.396807	0.396807	0.396807	0.620399	0.620399	0.620399	0.620399	0.620399	0.60277	0.60277	0.60277	0.60277	0.60277	0.338134	0.338134	0.338134	0.338134	0.338134	0.339226	0.339226	0.339226
Rorb_L23FSI_amp_j	0.225508	0.244709	0.204524	0.364662	1.72668	0.364662	1.72668	0.204524	1.13616	0.305312	0.156006	0.305312	0.156006	1.13616	0.350834	0.411529	0.447991	0.204569	0.411529	0.447991	0.204569	0.350834	0.447991	0.204569	0.350834	0.411529	0.620399	0.60277	0.338134	0.339226	0.714188	0.396807	0.60277	0.338134	0.339226	0.714188	0.396807	0.620399	0.338134	0.339226	0.714188	0.396807	0.620399	0.60277	0.339226	0.714188	0.396807	0.620399	0.60277
Tlx3_L23FSI_amp_i	0.467156	0.462598	0.158908	0.158908	0.158908	0.158908	0.158877	0.158877	0.158877	0.158877	0.742536	0.742536	0.742536	0.742536	0.340466	0.340466	0.340466	0.340466	0.439667	0.439667	0.439667	0.439667
Tlx3_L23FSI_amp_j	0.462598	0.467156	0.158877	0.742536	0.340466	0.439667	0.158908	0.742536	0.340466	0.439667	0.158908	0.158877	0.340466	0.439667	0.158908	0.158877	0.742536	0.439667	0.158908	0.158877	0.742536	0.340466
Pvalb_L23PC_amp_i	-0.55233	-0.332154	-0.102954	-0.102954	-1.97154	-1.97154	-0.0665569	-0.0665569	-0.0424876	-0.0424876	-0.0424876	-0.116352	-0.116352	-0.116352	-0.0398738	-0.0398738	-0.0398738	-0.266422	-0.266422	-0.266422	-0.366174	-0.624981	-0.537864	-0.0456735	-0.0670541	-0.0374086	-0.242469	-0.2734	-1.0419	-1.0419	-1.0419	-0.283069	-0.283069	-0.283069	-0.333506	-0.333506	-0.333506	-0.340168	-0.340168	-0.340168	-0.105926	-0.105926	-0.103582	-0.103582	-0.165222	-0.165222	-0.628005	-0.331114	-0.031189
Pvalb_L23PC_amp_j	-0.332154	-0.55233	-1.97154	-0.0665569	-0.102954	-0.0665569	-0.102954	-1.97154	-0.116352	-0.0398738	-0.266422	-0.0424876	-0.0398738	-0.266422	-0.0424876	-0.116352	-0.266422	-0.0424876	-0.116352	-0.0398738	-0.624981	-0.366174	-0.0456735	-0.537864	-0.0374086	-0.0670541	-0.2734	-0.242469	-0.283069	-0.333506	-0.340168	-1.0419	-0.333506	-0.340168	-1.0419	-0.283069	-0.340168	-1.0419	-0.283069	-0.333506	-0.103582	-0.165222	-0.105926	-0.165222	-0.105926	-0.103582	-0.331114	-0.628005	-0.10996
Sst_L23PC_amp_i	-0.081368	-0.081368	-0.081368	-0.081368	-0.0739399	-0.0739399	-0.0739399	-0.0739399	-0.113129	-0.113129	-0.113129	-0.113129	-0.121017	-0.121017	-0.121017	-0.121017	-0.0758739	-0.0758739	-0.0758739	-0.0758739	-0.0943548	-0.0943548	-0.0943548	-0.0814344	-0.0814344	-0.0814344	-0.127617	-0.127617	-0.127617	-0.0501834	-0.0501834	-0.0501834	-0.0679203	-0.0679203	-0.0507912	-0.0507912	-0.0953075	-0.0953075	-0.0216678	-0.262124	-0.394798	-0.452979	-0.129191	-0.10738	-0.21424	-0.21424	-0.21424	-0.103433	-0.103433
Sst_L23PC_amp_j	-0.0739399	-0.113129	-0.121017	-0.0758739	-0.081368	-0.113129	-0.121017	-0.0758739	-0.081368	-0.0739399	-0.121017	-0.0758739	-0.081368	-0.0739399	-0.113129	-0.0758739	-0.081368	-0.0739399	-0.113129	-0.121017	-0.0814344	-0.127617	-0.0501834	-0.0943548	-0.127617	-0.0501834	-0.0943548	-0.0814344	-0.0501834	-0.0943548	-0.0814344	-0.127617	-0.0507912	-0.0953075	-0.0679203	-0.0953075	-0.0679203	-0.0507912	-0.262124	-0.0216678	-0.452979	-0.394798	-0.10738	-0.129191	-0.103433	-0.0557893	-0.0753891	-0.21424	-0.0557893
Pvalb_L23FSI_amp_i	-0.205382	-0.205382	-0.205382	-0.318955	-0.318955	-0.318955	-0.155493	-0.155493	-0.155493	-0.299355	-0.299355	-0.299355	-0.111113	-0.111113	-0.111113	-0.374693	-0.374693	-0.374693	-0.407685	-0.407685	-0.407685	-0.0394177	-0.0394177	-0.0394177	-1.00342	-1.00342	-0.185531	-0.185531	-0.0674529	-0.0674529	-0.169515	-0.169515	-0.169515	-0.169515	-0.169515	-0.169515	-0.086572	-0.086572	-0.086572	-0.086572	-0.086572	-0.086572	-0.0762011	-0.0762011	-0.0762011	-0.0762011	-0.0762011	-0.0762011	-0.300392
Pvalb_L23FSI_amp_j	-0.318955	-0.155493	-0.299355	-0.205382	-0.155493	-0.299355	-0.205382	-0.318955	-0.299355	-0.205382	-0.318955	-0.155493	-0.374693	-0.407685	-0.0394177	-0.111113	-0.407685	-0.0394177	-0.111113	-0.374693	-0.0394177	-0.111113	-0.374693	-0.407685	-0.185531	-0.0674529	-1.00342	-0.0674529	-1.00342	-0.185531	-0.086572	-0.0762011	-0.300392	-0.0955223	-0.167823	-0.0437352	-0.169515	-0.0762011	-0.300392	-0.0955223	-0.167823	-0.0437352	-0.169515	-0.086572	-0.300392	-0.0955223	-0.167823	-0.0437352	-0.169515
Sst_L23FSI_amp_i	-0.374273	-0.124722	-0.162478	-0.162478	-0.162478	-0.162478	-0.162478	-1.65978	-1.65978	-1.65978	-1.65978	-1.65978	-0.215949	-0.215949	-0.215949	-0.215949	-0.215949	-0.256114	-0.256114	-0.256114	-0.256114	-0.256114	-0.228082	-0.228082	-0.228082	-0.228082	-0.228082	-0.177475	-0.177475	-0.177475	-0.177475	-0.177475	-0.10155	-0.10155	-0.10155	-0.129868	-0.129868	-0.129868	-0.115503	-0.115503	-0.115503	-0.148234	-0.148234	-0.148234	-0.361168	-0.361168	-0.361168	-0.141441	-0.141441
Sst_L23FSI_amp_j	-0.124722	-0.374273	-1.65978	-0.215949	-0.256114	-0.228082	-0.177475	-0.162478	-0.215949	-0.256114	-0.228082	-0.177475	-0.162478	-1.65978	-0.256114	-0.228082	-0.177475	-0.162478	-1.65978	-0.215949	-0.228082	-0.177475	-0.162478	-1.65978	-0.215949	-0.256114	-0.177475	-0.162478	-1.65978	-0.215949	-0.256114	-0.228082	-0.129868	-0.115503	-0.148234	-0.10155	-0.115503	-0.148234	-0.10155	-0.129868	-0.148234	-0.10155	-0.129868	-0.115503	-0.141441	-0.275805	-1.33083	-0.361168	-0.275805
[truncated: 801 more columns]
