# Supplementary material for: Synaptic connectivity to L2/3 of primary visual cortex measured by two-photon optogenetic stimulation
Source: eLife. 2022 Jan 21;11:e71103. doi: 10.7554/eLife.71103 (PMC8824465; doi:10.7554/eLife.71103)
Supplement: Figure 10—source data 1. [file elife-71103-fig10-data1.xlsx]

## Sheet: Pvalb_divergence
cell1_post_x_ap	-210.321	-52.7849
cell1_post_y_pia	86	70
cell1_post_class	interneuron	interneuron
cell1_pre_y_pia	83.2267
cell2_post_x_ap	128.423	-10.794	285.958
cell2_post_y_pia	86	90	70
cell2_post_class	interneuron	pyramidal	interneuron
cell2_pre_y_pia	84.0128
cell3_post_x_ap	-131.115	165.638
cell3_post_y_pia	90	70
cell3_post_class	pyramidal	interneuron
cell3_pre_y_pia	100.927
cell4_post_x_ap	176.827	102.922	-55.79
cell4_post_y_pia	178	177	93
cell4_post_class	pyramidal	pyramidal	pyramidal
cell4_pre_y_pia	126.293
cell5_post_x_ap	-14.562	10.114
cell5_post_y_pia	134	178
cell5_post_class	pyramidal	pyramidal
cell5_pre_y_pia	158.128
cell6_post_x_ap	248.873	16.2558
cell6_post_y_pia	178	93
cell6_post_class	pyramidal	pyramidal
cell6_pre_y_pia	171.514
cell7_post_x_ap	-55.8478	63.0353	-76.1814	220.571
cell7_post_y_pia	69	86	90	70
cell7_post_class	interneuron	interneuron	pyramidal	interneuron
cell7_pre_y_pia	193.19
cell8_post_x_ap	9.52461	19.603	-96.5092
cell8_post_y_pia	180	296	160
cell8_post_class	pyramidal	interneuron	interneuron
cell8_pre_y_pia	261.391
cell9_post_x_ap	-113.076	-8.39372
cell9_post_y_pia	184	177
cell9_post_class	pyramidal	interneuron
cell9_pre_y_pia	263.411
cell10_post_x_ap	-15.6762	-248.293
cell10_post_y_pia	178	93
cell10_post_class	pyramidal	pyramidal
cell10_pre_y_pia	280.286
cell11_post_x_ap	-200.482	100.219	-40.2991
cell11_post_y_pia	173	148	133
cell11_post_class	pyramidal	pyramidal	interneuron
cell11_pre_y_pia	303.438
cell12_post_x_ap	-37.1469	67.5356
cell12_post_y_pia	184	177
cell12_post_class	pyramidal	interneuron
cell12_pre_y_pia	312.074
cell13_post_x_ap	-102.642	6.64651
cell13_post_y_pia	256	229
cell13_post_class	interneuron	interneuron
cell13_pre_y_pia	311.377
cell14_post_x_ap	66.686	76.7644	-39.3478
cell14_post_y_pia	180	296	160
cell14_post_class	pyramidal	interneuron	interneuron
cell14_pre_y_pia	318.559
cell15_post_x_ap	148.126	-10.5859
cell15_post_y_pia	177	93
cell15_post_class	pyramidal	pyramidal
cell15_pre_y_pia	344.459
cell16_post_x_ap	-27.184	53.1759
cell16_post_y_pia	142	176
cell16_post_class	pyramidal	pyramidal
cell16_pre_y_pia	332.085
cell17_post_x_ap	3.06593	-50.274
cell17_post_y_pia	139	285
cell17_post_class	pyramidal	interneuron
cell17_pre_y_pia	347.902
cell18_post_x_ap	-7.79717	-26.1963	53.0633
cell18_post_y_pia	205	251	232
cell18_post_class	pyramidal	pyramidal	pyramidal
cell18_pre_y_pia	360.358
cell19_post_x_ap	28.9566	-143.799
cell19_post_y_pia	284	232
cell19_post_class	pyramidal	pyramidal
cell19_pre_y_pia	373.527
cell20_post_x_ap	-55.2423	-20.885
cell20_post_y_pia	229	204
cell20_post_class	pyramidal	pyramidal
cell20_pre_y_pia	386.189
cell21_post_x_ap	20.3331	1.9339	81.1935
cell21_post_y_pia	205	251	232
cell21_post_class	pyramidal	pyramidal	pyramidal
cell21_pre_y_pia	394.885
cell22_post_x_ap	158.731	-32.8931
cell22_post_y_pia	177	170
cell22_post_class	pyramidal	pyramidal
cell22_pre_y_pia	415.44
cell23_post_x_ap	-18.893	-37.2922	41.9674
cell23_post_y_pia	205	251	232
cell23_post_class	pyramidal	pyramidal	pyramidal
cell23_pre_y_pia	426.013
cell24_post_x_ap	226.403	85.8853
cell24_post_y_pia	148	133
cell24_post_class	pyramidal	interneuron
cell24_pre_y_pia	455.553

## Sheet: Sst_divergence
cell1_post_x_ap	-44.6497	-109.433
cell1_post_y_pia	205	215
cell1_post_class	pyramidal	pyramidal
cell1_pre_y_pia	200.211
cell2_post_x_ap	43.9499	-0.89167
cell2_post_y_pia	215	293
cell2_post_class	pyramidal	pyramidal
cell2_pre_y_pia	223.516
cell3_post_x_ap	-6.05219	-70.8359
cell3_post_y_pia	205	215
cell3_post_class	pyramidal	pyramidal
cell3_pre_y_pia	240.992
cell4_post_x_ap	109.571	-89.7223
cell4_post_y_pia	162	137
cell4_post_class	pyramidal	pyramidal
cell4_pre_y_pia	256.234
cell5_post_x_ap	61.2361	16.3946
cell5_post_y_pia	215	293
cell5_post_class	pyramidal	pyramidal
cell5_pre_y_pia	285.163
cell6_post_x_ap	101.69	23.0302
cell6_post_y_pia	150	174
cell6_post_class	pyramidal	pyramidal
cell6_pre_y_pia	269.134
cell7_post_x_ap	-99.8977	-7.81553
cell7_post_y_pia	177	147
cell7_post_class	pyramidal	pyramidal
cell7_pre_y_pia	271.802
cell8_post_x_ap	69.4962	-129.797
cell8_post_y_pia	162	137
cell8_post_class	pyramidal	pyramidal
cell8_pre_y_pia	282.224
cell9_post_x_ap	77.0091	12.2254	-32.6162
cell9_post_y_pia	205	215	293
cell9_post_class	pyramidal	pyramidal	pyramidal
cell9_pre_y_pia	310.802
cell10_post_x_ap	-98.5817	-180.36	189.604
cell10_post_y_pia	216	255	285
cell10_post_class	pyramidal	pyramidal	interneuron
cell10_pre_y_pia	304.483
cell11_post_x_ap	170.942	-28.352
cell11_post_y_pia	162	137
cell11_post_class	pyramidal	pyramidal
cell11_pre_y_pia	317.216
cell12_post_x_ap	-136.597	-218.375
cell12_post_y_pia	216	255
cell12_post_class	pyramidal	pyramidal
cell12_pre_y_pia	344.318
cell13_post_x_ap	-111.121	-131.595
cell13_post_y_pia	174	262
cell13_post_class	pyramidal	interneuron
cell13_pre_y_pia	349.634
cell14_post_x_ap	-48.7907	-93.6322
cell14_post_y_pia	215	293
cell14_post_class	pyramidal	pyramidal
cell14_pre_y_pia	409.767
cell15_post_x_ap	-60.4292	29.9568
cell15_post_y_pia	281	179
cell15_post_class	pyramidal	pyramidal
cell15_pre_y_pia	409.396
cell16_post_x_ap	109.105	20.2256
cell16_post_y_pia	163	235
cell16_post_class	pyramidal	pyramidal
cell16_pre_y_pia	407.126
cell17_post_x_ap	-68.7506	21.6354
cell17_post_y_pia	281	179
cell17_post_class	pyramidal	pyramidal
cell17_pre_y_pia	412.649
cell18_post_x_ap	78.2975	2.64334
cell18_post_y_pia	308	340
cell18_post_class	pyramidal	pyramidal
cell18_pre_y_pia	432.092
cell19_post_x_ap	143.786	52.4243
cell19_post_y_pia	196	153
cell19_post_class	pyramidal	pyramidal
cell19_pre_y_pia	435.995
cell20_post_x_ap	157.835	-3.31953
cell20_post_y_pia	308	210
cell20_post_class	pyramidal	interneuron
cell20_pre_y_pia	459.159
cell21_post_x_ap	-109.329	6.93572
cell21_post_y_pia	261	253
cell21_post_class	pyramidal	pyramidal
cell21_pre_y_pia	487.078

## Sheet: Penk_divergence
cell1_post_x_ap	123.165	-43.4085
cell1_post_y_pia	133	95
cell1_post_class	interneuron	pyramidal
cell1_pre_y_pia	110.935
cell2_post_x_ap	190.122	-29.9025
cell2_post_y_pia	146	171
cell2_post_class	pyramidal	interneuron
cell2_pre_y_pia	130.527
cell3_post_x_ap	95.2048	-124.82
cell3_post_y_pia	146	171
cell3_post_class	pyramidal	interneuron
cell3_pre_y_pia	157.017

## Sheet: Rorb_divergence
cell1_post_x_ap	-158.262	-0.248055
cell1_post_y_pia	130	138
cell1_post_class	pyramidal	interneuron
cell1_pre_y_pia	316.311
cell2_post_x_ap	125.627	-3.07729	-100.594
cell2_post_y_pia	199	214	244
cell2_post_class	pyramidal	pyramidal	pyramidal
cell2_pre_y_pia	349.502
cell3_post_x_ap	7.39161	-106.705
cell3_post_y_pia	97	222
cell3_post_class	pyramidal	pyramidal
cell3_pre_y_pia	360.852
cell4_post_x_ap	291.061	193.544
cell4_post_y_pia	214	244
cell4_post_class	pyramidal	pyramidal
cell4_pre_y_pia	375.277
cell5_post_x_ap	230.674	-53.4653
cell5_post_y_pia	317	239
cell5_post_class	pyramidal	pyramidal
cell5_pre_y_pia	385.928
cell6_post_x_ap	269.255	100.503
cell6_post_y_pia	230	268
cell6_post_class	pyramidal	pyramidal
cell6_pre_y_pia	370.126
cell7_post_x_ap	-9.72345	98.268
cell7_post_y_pia	147	155
cell7_post_class	pyramidal	pyramidal
cell7_pre_y_pia	372.282
cell8_post_x_ap	-68.1858	-90.2174
cell8_post_y_pia	226	268
cell8_post_class	pyramidal	pyramidal
cell8_pre_y_pia	394.985
cell9_post_x_ap	111.511	89.4798
cell9_post_y_pia	226	268
cell9_post_class	pyramidal	pyramidal
cell9_pre_y_pia	397.534
cell10_post_x_ap	24.3429	73.1893
cell10_post_y_pia	150	165
cell10_post_class	pyramidal	pyramidal
cell10_pre_y_pia	410.809
cell11_post_x_ap	247.108	20.887
cell11_post_y_pia	199	244
cell11_post_class	pyramidal	pyramidal
cell11_pre_y_pia	426.185
cell12_post_x_ap	320.062	93.8414
cell12_post_y_pia	199	244
cell12_post_class	pyramidal	pyramidal
cell12_pre_y_pia	429.459
cell13_post_x_ap	-244.595	135.774
cell13_post_y_pia	242	278
cell13_post_class	pyramidal	pyramidal
cell13_pre_y_pia	423.028
cell14_post_x_ap	24.2549	-89.842
cell14_post_y_pia	97	222
cell14_post_class	pyramidal	pyramidal
cell14_pre_y_pia	441.156
cell15_post_x_ap	64.1058	-80.4427	-194.54
cell15_post_y_pia	143	97	222
cell15_post_class	pyramidal	pyramidal	pyramidal
cell15_pre_y_pia	440.369
cell16_post_x_ap	151.854	57.6117
cell16_post_y_pia	214	248
cell16_post_class	pyramidal	pyramidal
cell16_pre_y_pia	441.35
cell17_post_x_ap	8.12908	116.12	100.996
cell17_post_y_pia	147	155	202
cell17_post_class	pyramidal	pyramidal	pyramidal
cell17_pre_y_pia	456.14
cell18_post_x_ap	137.765	40.2476
cell18_post_y_pia	214	244
cell18_post_class	pyramidal	pyramidal
cell18_pre_y_pia	477.254
cell19_post_x_ap	190.689	96.4462	215.564
cell19_post_y_pia	214	248	317
cell19_post_class	pyramidal	pyramidal	pyramidal
cell19_pre_y_pia	479.42
cell20_post_x_ap	-39.4764	-136.993
cell20_post_y_pia	214	244
cell20_post_class	pyramidal	pyramidal
cell20_pre_y_pia	501.053
cell21_post_x_ap	12.109	79.354
cell21_post_y_pia	240	193
cell21_post_class	interneuron	pyramidal
cell21_pre_y_pia	486.129
cell22_post_x_ap	75.0504	-44.1723
cell22_post_y_pia	185	245
cell22_post_class	pyramidal	pyramidal
cell22_pre_y_pia	510.729
cell23_post_x_ap	132.505	110.474
cell23_post_y_pia	226	268
cell23_post_class	pyramidal	pyramidal
cell23_pre_y_pia	515.3
cell24_post_x_ap	216.056	-41.0406	139.366
cell24_post_y_pia	224	185	206
cell24_post_class	pyramidal	pyramidal	pyramidal
cell24_pre_y_pia	528.21
cell25_post_x_ap	-72.9552	-5.71022
cell25_post_y_pia	240	193
cell25_post_class	interneuron	pyramidal
cell25_pre_y_pia	525.52
cell26_post_x_ap	409.433	273.43
cell26_post_y_pia	217	143
cell26_post_class	pyramidal	pyramidal
cell26_pre_y_pia	540.777
cell27_post_x_ap	-274.596	-468.925
cell27_post_y_pia	311	262
cell27_post_class	pyramidal	pyramidal
cell27_pre_y_pia	766.926

## Sheet: Tlx3_divergence
cell1_post_x_ap	86.6589	35.4166
cell1_post_y_pia	126	219
cell1_post_class	pyramidal	interneuron
cell1_pre_y_pia	436.197
cell2_post_x_ap	194.583	165.537
cell2_post_y_pia	273	245
cell2_post_class	pyramidal	pyramidal
cell2_pre_y_pia	525.405
cell3_post_x_ap	233.667	204.621	128.228
cell3_post_y_pia	273	245	188
cell3_post_class	pyramidal	pyramidal	pyramidal
cell3_pre_y_pia	547.985
cell4_post_x_ap	176.299	-78.1221
cell4_post_y_pia	274	239
cell4_post_class	pyramidal	pyramidal
cell4_pre_y_pia	556.033
cell5_post_x_ap	-370.213	-372.948
cell5_post_y_pia	160	207
cell5_post_class	pyramidal	interneuron
cell5_pre_y_pia	666.35
cell6_post_x_ap	32.1108	-179.407
cell6_post_y_pia	243	223
cell6_post_class	pyramidal	pyramidal
cell6_pre_y_pia	706.413
cell7_post_x_ap	-144.223	152.684
cell7_post_y_pia	223	240
cell7_post_class	pyramidal	pyramidal
cell7_pre_y_pia	715.323

## Sheet: Fig10B_exc_div_ij_dist
exc_div_ij_dist_bins	0	100	200	300	400
Rorb_icnx_hist	71	159	42	8
Rorb_div_hist	20	35	14	2
Rorb_div_fraction	0.28169	0.220126	0.333333	0.25
Rorb_ci_low	0.187285	0.161132	0.20554	0.0559669
Rorb_ci_high	0.393484	0.289201	0.483222	0.591624
Penk_icnx_hist	23	25	20	0
Penk_div_hist	0	1	2	0
Penk_div_fraction	0	0.04	0.1
Penk_ci_low	2.11183e-05	0.0043504	0.0213725
Penk_ci_high	0.102394	0.172133	0.283853
Tlx3_icnx_hist	50	31	22	0
Tlx3_div_hist	7	3	6	0
Tlx3_div_fraction	0.14	0.0967742	0.272727
Tlx3_ci_low	0.0648717	0.028019	0.122705
Tlx3_ci_high	0.255325	0.236253	0.478231

## Sheet: Fig10B_inh_div_ij_dist
inh_div_ij_dist_bins	0	100	200	300	400
Pvalb_icnx_hist	37	54	20	7
Pvalb_div_hist	27	18	9	2
Pvalb_div_fraction	0.72973	0.333333	0.45	0.285714
Pvalb_ci_low	0.57333	0.21884	0.251023	0.0647283
Pvalb_ci_high	0.851763	0.46516	0.662335	0.647662
Sst_icnx_hist	41	50	15	8
Sst_div_hist	22	15	7	1
Sst_div_fraction	0.536585	0.3	0.466667	0.125
Sst_ci_low	0.38583	0.186877	0.238787	0.0138382
Sst_ci_high	0.682374	0.435528	0.706114	0.453719

## Sheet: Fig10C_exc_div_presyn_layer
presynaptic_layer	2	4	5
Rorb_icnx_hist	19	170	91
Rorb_div_hist	1	48	22
Rorb_div_fraction	0.0526316	0.282353	0.241758
Rorb_div_ci_low	0.0057389	0.218774	0.162783
Rorbdiv_ci_high	0.220729	0.353271	0.33686
presynaptic_layer	2	4	5
Penk_icnx_hist	68
Penk_div_hist	3
Penk_div_fraction	0.0441176
Penk_div_ci_low	0.01258
Penkdiv_ci_high	0.113063
presynaptic_layer	2	4	5
Tlx3_icnx_hist			88
Tlx3_div_hist			15
Tlx3_div_fraction			0.170455
Tlx3_div_ci_low			0.103139
Tlx3div_ci_high			0.259019
exc_con_bins	80	330	480	780	1000
exc_con_midX	205	405	630	890
exc_con_layer	2	4	5	6
exc_con_probed_hist	1009	1870	2258	773
exc_con_exc_hist	34	180	134	1
exc_con_exc_frac	0.0336967	0.0962567	0.0593446	0.00129366
exc_con_exc_ci_low	0.023862	0.0835129	0.0501591	0.000139618
exc_con_exc_ci_high	0.0461991	0.110249	0.0696586	0.00603053

## Sheet: Fig10C_inh_div_presyn_layer
presynaptic_layer	2	4	5
Pvalb_icnx_hist	47	68
Pvalb_div_hist	26	30
Pvalb_div_fraction	0.553191	0.441176
Pvalb_div_ci_low	0.41144	0.327655
Pvalbdiv_ci_high	0.688613	0.559588
presynaptic_layer	2	4	5
Sst_icnx_hist	69	35	10
Sst_div_hist	28	15	2
Sst_div_fraction	0.405797	0.428571	0.2
Sst_div_ci_low	0.295752	0.275685	0.0440594
Sstdiv_ci_high	0.523562	0.592741	0.502774
Pvalb_pia_con_bins	80	330	480	780	1000
Pvalb_pia_con_midX	205	405	630	890
Pvalb_pia_con_probed_hist	133	184	231	13
Pvalb_pia_con_inh_hist	32	35	2	0
Pvalb_pia_con_inh_frac	0.240602	0.190217	0.00865801	0
Pvalb_pia_con_inh_ci_low	0.174056	0.138583	0.0018034	3.70519e-05
Pvalb_pia_con_inh_ci_high	0.318295	0.251507	0.0274821	0.172619
Sst_pia_con_bins	80	330	480	780	1000
Sst_pia_con_midX	205	405	630	890
Sst_pia_con_probed_hist	239	221	310	18
Sst_pia_con_inh_hist	81	48	18	0
Sst_pia_con_inh_frac	0.338912	0.217195	0.0580645	0
Sst_pia_con_inh_ci_low	0.281123	0.166728	0.0360336	2.69031e-05
Sst_pia_con_inh_ci_high	0.400576	0.275012	0.0882871	0.128558

## Sheet: Fig10D_diverge_amplitudes
Pvalb_amp_i	0.0882274	0.537864	0.877874	0.242469	1.0419	0.105926	0.341764	1.52768	0.118495	0.118495	0.224746	0.224746	0.276572	0.276572	0.138535	0.138535	0.102663	0.102663	0.885648	0.885648	0.273958	0.273958	0.344324	0.344324	0.431668	0.431668	1.35244	0.828781	0.731386	0.158452	0.0619072	0.0761625	1.95396	1.95396	0.802445	0.802445	0.424254	0.424254	0.571014	0.140642	0.0966394	0.201014
Pvalb_amp_j	0.537864	0.0882274	0.242469	0.877874	0.105926	1.0419	1.52768	0.341764	0.224746	0.276572	0.118495	0.276572	0.118495	0.224746	0.102663	0.885648	0.138535	0.885648	0.138535	0.102663	0.344324	0.431668	0.273958	0.431668	0.273958	0.344324	0.828781	1.35244	0.158452	0.731386	0.0761625	0.0619072	0.802445	0.424254	1.95396	0.424254	1.95396	0.802445	0.140642	0.571014	0.201014	0.0966394
Sst_amp_i	0.0881513	0.0507912	0.262124	0.0676762	0.124428	0.0675382	0.10738	0.0753891	0.285536	0.0864137	0.127266	0.0899096	0.0199703	0.129586	0.245438	0.252018	0.109079	0.282416	0.232399	0.0798369	0.157517	0.21717	0.306765	0.122349	0.0937619	0.0664521	0.124767	0.147063	0.393963	0.393963	0.914843	0.914843	0.366276	0.366276	0.167298	0.191316	0.0845826	0.182759	0.0980117	0.0843378	0.0709529	0.0426347
Sst_amp_j	0.0507912	0.0881513	0.0676762	0.262124	0.0675382	0.124428	0.0753891	0.10738	0.0864137	0.285536	0.0899096	0.127266	0.129586	0.0199703	0.252018	0.245438	0.282416	0.109079	0.0798369	0.232399	0.21717	0.157517	0.122349	0.306765	0.0664521	0.0937619	0.147063	0.124767	0.914843	0.366276	0.393963	0.366276	0.393963	0.914843	0.191316	0.167298	0.182759	0.0845826	0.0843378	0.0980117	0.0426347	0.0709529
Rorb_amp_i	0.23973	0.430718	0.300014	0.262512	0.136576	0.0519204	0.23798	0.390677	0.277486	0.277486	0.119558	0.119558	0.274886	0.274886	0.387775	1.45789	0.175105	0.0473938	0.376736	0.17859	0.16054	0.256318	0.839082	0.171761	0.0711876	0.324425	0.89712	0.89712	0.113407	0.113407	0.647941	0.647941	0.394853	0.0978008	0.0817154	0.255116	2.84879	2.84879	0.28961	0.28961	0.024482	0.024482	0.168908	0.223602	0.811836	0.167795	1.15741	0.316511	0.164093
Rorb_amp_j	0.430718	0.23973	0.262512	0.300014	0.0519204	0.136576	0.390677	0.23798	0.119558	0.274886	0.277486	0.274886	0.277486	0.119558	1.45789	0.387775	0.0473938	0.175105	0.17859	0.376736	0.256318	0.16054	0.171761	0.839082	0.324425	0.0711876	0.113407	0.647941	0.89712	0.647941	0.89712	0.113407	0.0978008	0.394853	0.255116	0.0817154	0.28961	0.024482	2.84879	0.024482	2.84879	0.28961	0.223602	0.168908	0.167795	0.811836	0.316511	1.15741	0.599144
Tlx3_amp_i	0.592872	0.592872	0.0688393	0.0688393	0.719237	0.719237	0.196302	1.56279	0.304859	0.417297	3.49791	0.340502	0.12039	0.858814
Tlx3_amp_j	0.0688393	0.719237	0.592872	0.719237	0.592872	0.0688393	1.56279	0.196302	0.417297	0.304859	0.340502	3.49791	0.858814	0.12039
[truncated: 15 more columns]
